# Supplementary material
Source: PubMed Central journal article supplement (PMC3121219)
Supplement: supp_kwq471_Web_Material.pdf [file supp_kwq471_Web_Material.pdf]

Web Figure 1

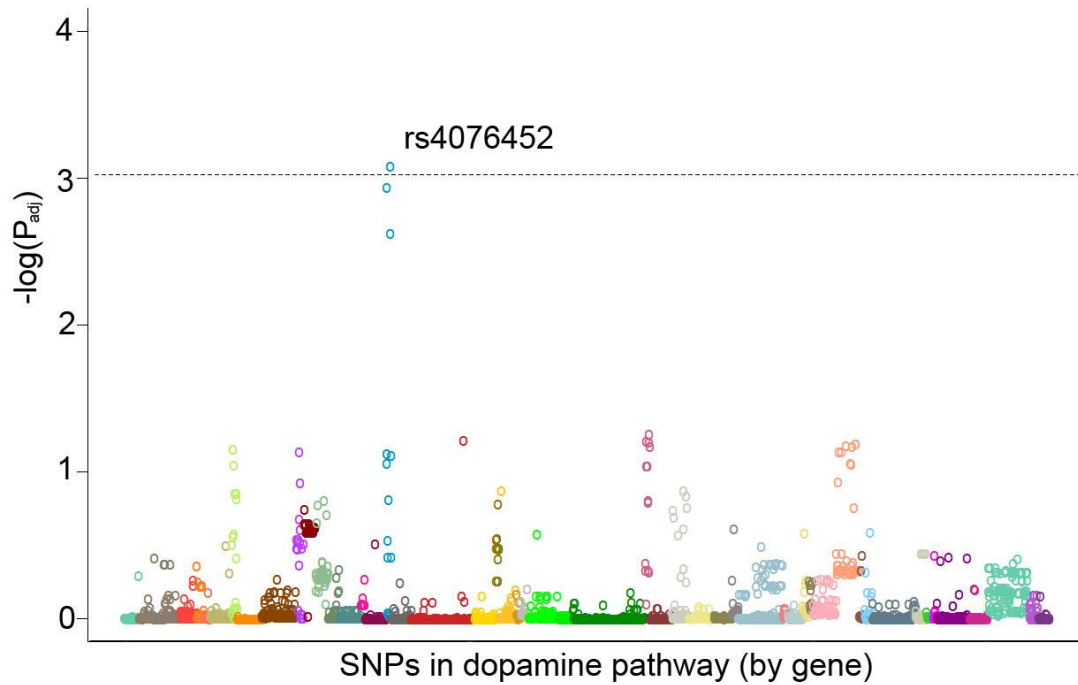

Web Figure 1. Adjusted p-values for the association between the SNPs in dopamine pathway and smoking initiation in the WSPT<sup>§</sup>.

<sup>§</sup>: Different colors indicate SNPs in different genes. Dashed line represents pathway-wide significance.

Genes regions included (from left to right) are ADCYAP1, ANKK1\_DRD2, BDNF, CALM1, CDK5, CHRNA2, CHRNA5\_CHRNA3\_CHRNB4, CHRNA7, CHRNB2, CHRNB3\_CHRNA6, CHRNA4, CLIC6, CNR1, COMT, CREB1, CREBBP, CRHR1, DBH, DDC, DRD, DRD3, DRD4, DRD5, CALY, EPB41, EPB41L1, EPB41L2, FLNA, FOSB, FREQ (NCS1), GNAS, GNAZ, GRB2, HCRTR1, HCRTR2, HTR1A, HTR1B, KCNJ9, KLF16, MAOA\_MAOB, MAPK1, NCK1, NR4A2, NTRK1, OPRM1, PAR4,POMC, PPP1R1B, PRKAR2B, SLC6A3, SNCA, TDO2, TH.

Key for Web Figure 1

|                        |           |             |
|------------------------|-----------|-------------|
| ○ ADCYAP1              | ○ DDC     | ○ HTR1B     |
| ○ ANKK1_DRD2           | ○ DRD1    | ○ KCNJ9     |
| ○ BDNF                 | ○ DRD11P  | ○ KLF16     |
| ○ CALM1                | ○ DRD3    | ○ MAOA_MAOB |
| ○ CDK5                 | ○ DRD4    | ○ MAPK1     |
| ○ CHRNA2               | ○ DRD5    | ○ NCK1      |
| ○ CHRNA4               | ○ EPB41   | ○ NR4A2     |
| ○ CHRNA5_CHRNA3_CHRNB4 | ○ EPB41L1 | ○ NTRK1     |
| ○ CHRNA7               | ○ EPB41L2 | ○ OPRM1     |
| ○ CHRNB2               | ○ FLNA    | ○ PAR4      |
| ○ CHRNB3_CHRNA6        | ○ FOSB    | ○ PICK1     |
| ○ CLIC6                | ○ FREQ    | ○ POMC      |
| ○ CNR1                 | ○ GNAS    | ○ PPP1R1B   |
| ○ COMT                 | ○ GNAZ    | ○ PRKAR2B   |
| ○ CREB1                | ○ GRB2    | ○ SLC6A3    |
| ○ CREBBP               | ○ HCRTR1  | ○ SNCA      |
| ○ CRHR1                | ○ HCRTR2  | ○ TDO2      |
| ○ DBH                  | ○ HTR1A   | ○ TH        |

Web Figure 2

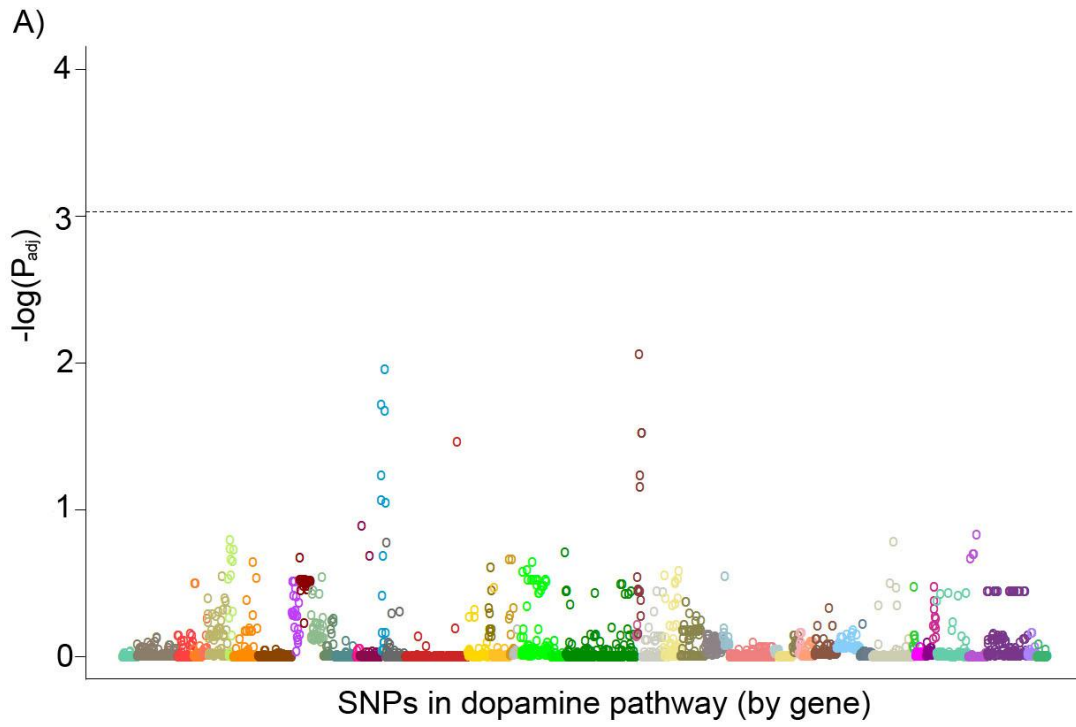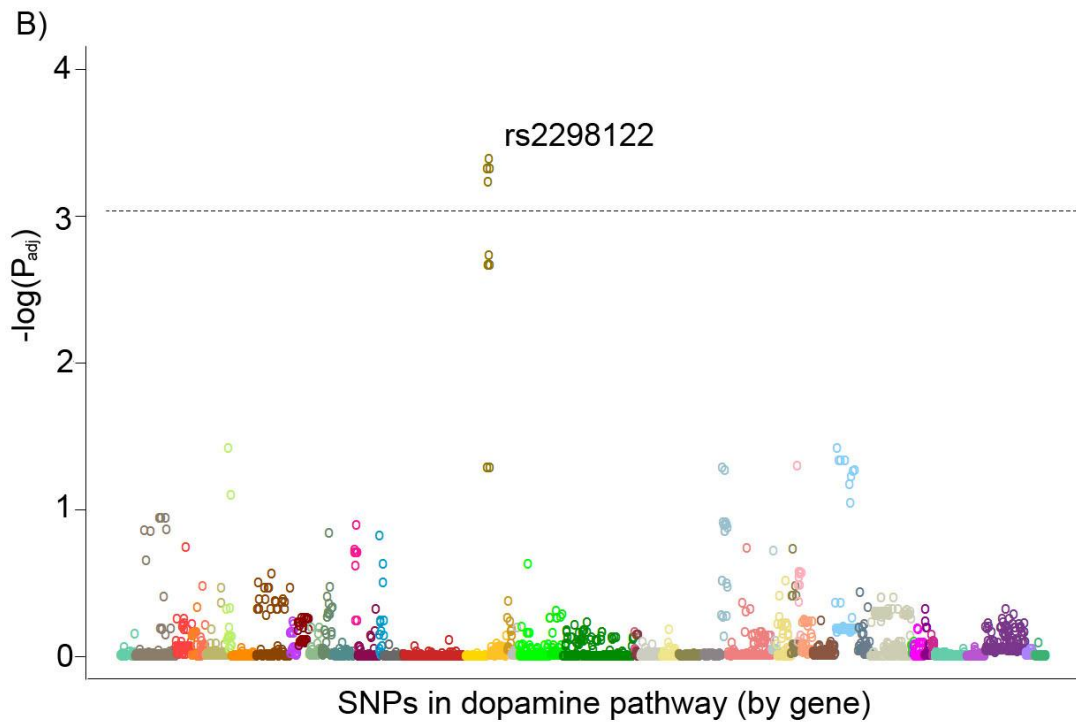

Web Figure 2. Adjusted p-values for the association between the SNPs in dopamine pathway and smoking initiation in different genders of WSPT<sup>§</sup>.

Web Figure 2A. Adjusted p-values of the association between SNPs in dopamine pathway and smoking initiation in males.

Web Figure 2B. Adjusted p-values of the association between SNPs in dopamine pathway and smoking initiation in females.

<sup>§</sup>: Different colors indicate SNPs in different gene regions. Dashed line represents pathway-wide significance.

Genes regions included (from left to right) are ADCYAP1, ANKK1\_DRD2, BDNF, CALM1, CDK5, CHRNA2, CHRNA5\_CHRNA3\_CHRNB4, CHRNA7, CHRNB2, CHRNB3\_CHRNA6, CHRNA4, CLIC6, CNR1, COMT, CREB1, CREBBP, CRHR1, DBH, DDC, DRD, DRD3, DRD4, DRD5, CALY, EPB41, EPB41L1, EPB41L2, FLNA, FOSB, FREQ (NCS1), GNAS, GNAZ, GRB2, HCRTR1, HCRTR2, HTR1A, HTR1B, KCNJ9, KLF16, MAOA\_MAOB, MAPK1, NCK1, NR4A2, NTRK1, OPRM1, PAR4,POMC, PPP1R1B, PRKAR2B, SLC6A3, SNCA, TDO2, TH.

Key for Web Figure 2

|                        |           |             |
|------------------------|-----------|-------------|
| ○ ADCYAP1              | ○ DDC     | ○ HTR1B     |
| ○ ANKK1_DRD2           | ○ DRD1    | ○ KCNJ9     |
| ○ BDNF                 | ○ DRD11P  | ○ KLF16     |
| ○ CALM1                | ○ DRD3    | ○ MAOA_MAOB |
| ○ CDK5                 | ○ DRD4    | ○ MAPK1     |
| ○ CHRNA2               | ○ DRD5    | ○ NCK1      |
| ○ CHRNA4               | ○ EPB41   | ○ NR4A2     |
| ○ CHRNA5_CHRNA3_CHRNB4 | ○ EPB41L1 | ○ NTRK1     |
| ○ CHRNA7               | ○ EPB41L2 | ○ OPRM1     |
| ○ CHRNB2               | ○ FLNA    | ○ PAR4      |
| ○ CHRNB3_CHRNA6        | ○ FOSB    | ○ PICK1     |
| ○ CLIC6                | ○ FREQ    | ○ POMC      |
| ○ CNR1                 | ○ GNAS    | ○ PPP1R1B   |
| ○ COMT                 | ○ GNAZ    | ○ PRKAR2B   |
| ○ CREB1                | ○ GRB2    | ○ SLC6A3    |
| ○ CREBBP               | ○ HCRTR1  | ○ SNCA      |
| ○ CRHR1                | ○ HCRTR2  | ○ TDO2      |
| ○ DBH                  | ○ HTR1A   | ○ TH        |

Web Table1: Complete list of selected candidate genes

| Gene Symbol          | Gene Name                                                | Chr | Total HapA | tagSNPs  |          |
|----------------------|----------------------------------------------------------|-----|------------|----------|----------|
|                      |                                                          |     |            | Selected | Coverage |
| DRD1IP (Calcyon)     | dopamine receptor D1 interactng protein                  | 10  | 18         | 6        | 0.81     |
| ADCYAP1              | adenylate cyclase activating polypeptide 1               | 18  | 71         | 24       | 0.84     |
| ANKK1_DRD2           |                                                          | 11  | 194        | 55       | 0.97     |
| ANKK1                | ankyrin repeat and kinase domain containing 1            |     |            |          |          |
| DRD2                 | dopamine receptor D2                                     |     |            |          |          |
| BDNF                 | brain-derived neurotrophic factor                        | 11  | 86         | 28       | 0.96     |
| CALM1                | calmodulin 1 (phosphorylase kinase, delta)               | 14  | 52         | 11       | 0.82     |
| CDK5                 | cyclin-dependent kinase 5                                | 7   | 27         | 11       | 0.85     |
| CHRNA2               | cholinergic receptor, nicotinic, alpha 2                 | 8   | 94         | 27       | 0.85     |
| CHRNA5_CHRNA3_CHRNB4 |                                                          | 15  | 103        | 30       | 0.89     |
| CHRNA5               | cholinergic receptor, nicotinic, alpha 5                 |     |            |          |          |
| CHRNA3               | cholinergic receptor, nicotinic, alpha 3                 |     |            |          |          |
| CHRNB4               | cholinergic receptor, nicotinic, beta 4                  |     |            |          |          |
| CHRNB3_CHRNA6        |                                                          | 8   | 79         | 8        | 0.76     |
| CHRNA6               | cholinergic receptor, nicotinic, alpha 6                 |     |            |          |          |
| CHRNB3               | cholinergic receptor, nicotinic, beta 3                  |     |            |          |          |
| CHRNA4               | cholinergic receptor, nicotinic, alpha 4                 | 20  | 53         | 12       | 0.92     |
| CHRNA7               | cholinergic receptor, nicotinic, alpha 7                 | 15  | 165        | 33       | 0.92     |
| CHRNB2               | cholinergic receptor, nicotinic, beta 2                  | 1   | 49         | 13       | 0.94     |
| CLIC6                | chloride intracellular channel 6                         | 21  | 80         | 21       | 0.97     |
| CNR1                 | cannabinoid receptor 1 (brain)                           | 6   | 70         | 21       | 0.91     |
| COMT                 | catechol-O-methyltransferase                             | 22  | 84         | 35       | 0.93     |
| CREB1                | cAMP responsive element binding protein 1                | 2   | 64         | 18       | 1.00     |
| CREBBP               | CREB binding protein (Rubinstein-Taybi syndrome)         | 16  | 225        | 30       | 0.90     |
| CRHR1                | corticotropin releasing hormone receptor 1               | 17  | 79         | 18       | 0.95     |
| DBH                  | dopamine beta-hydroxylase (dopamine beta-monooxygenase)  | 9   | 131        | 42       | 0.95     |
| DDC                  | dopa decarboxylase (aromatic L-amino acid decarboxylase) | 7   | 327        | 50       | 0.92     |
| DRD1                 | dopamine receptor D1                                     | 5   | 89         | 34       | 0.79     |
| DRD3                 | dopamine receptor D3                                     | 3   | 106        | 26       | 0.94     |
| DRD4                 | dopamine receptor D4                                     | 11  | 33         | 12       | 0.77     |
| DRD5                 | dopamine receptor D5                                     | 4   | 42         | 12       | 0.90     |

|                 |                                                                |    |             |             |             |
|-----------------|----------------------------------------------------------------|----|-------------|-------------|-------------|
| EPB41           | erythrocyte membrane protein band 4.1 (elliptocytosis 1, RH-1  | 1  | 206         | 48          | 0.97        |
| EPB41L1         | erythrocyte membrane protein band 4.1-like 1                   | 20 | 229         | 25          | 0.98        |
| EPB41L2         | erythrocyte membrane protein band 4.1-like 2                   | 6  | 446         | 51          | 0.84        |
| FLNA            | filamin A, alpha (actin binding protein 280)                   | X  | 39          | 11          | 1.00        |
| FOSB            | FBJ murine osteosarcoma viral oncogene homolog B               | 19 | 25          | 7           | 0.76        |
| GNAS            | GNAS complex locus                                             | 20 | 121         | 32          | 0.98        |
| GNAz            | guanine nucleotide binding protein (G protein), alpha z polype | 22 | 129         | 24          | 0.96        |
| GRB2            | growth factor receptor-bound protein 2                         | 17 | 111         | 23          | 0.96        |
| HCRTR1          | hypocretin (orexin) receptor 1                                 | 1  | 36          | 11          | 0.94        |
| HCRTR2          | hypocretin (orexin) receptor 2                                 | 6  | 229         | 56          | 0.94        |
| HTR1A           | 5-hydroxytryptamine (serotonin) receptor 1A                    | 5  | 28          | 6           | 1.00        |
| HTR1B           | 5-hydroxytryptamine (serotonin) receptor 1B                    | 6  | 67          | 29          | 0.93        |
| KCNJ9           | potassium inwardly-rectifying channel, subfamily J, member 9   | 1  | 31          | 11          | 0.97        |
| KLF16           | Kruppel-like factor 16                                         | 19 | 23          | 6           | 0.59        |
| MAOA_MAOB       |                                                                | X  | 217         | 42          | 0.98        |
| MAOA            | monoamine oxidase A                                            |    |             |             |             |
| MAOB            | monoamine oxidase B                                            |    |             |             |             |
| MAPK1           | mitogen-activated protein kinase 1                             | 22 | 145         | 28          | 0.97        |
| NCK1            | NCK adaptor protein 1                                          | 3  | 85          | 25          | 0.99        |
| FREQ (NCS1)     | frequenin homolog (Drosophila)                                 | 9  | 120         | 42          | 0.97        |
| NR4A2           | nuclear receptor subfamily 4, group A, member 2                | 2  | 32          | 10          | 1.00        |
| NTRK1           | neurotrophic tyrosine kinase, receptor, type 1                 | 1  | 119         | 14          | 0.71        |
| OPRM1           | opioid receptor, mu 1                                          | 6  | 426         | 46          | 0.74        |
| POMC            | proopiomelanocortin                                            | 2  | 36          | 16          | 0.94        |
| PPP1R1B         | protein phosphatase 1, regulatory (inhibitor) subunit 1B (DAR  | 17 | 24          | 9           | 0.91        |
| PRKAR2B         | protein kinase, cAMP-dependent, regulatory, type II, beta      | 7  | 151         | 36          | 0.92        |
| PICK1 (PRKCABP) | protein interacting with PRKCA 1                               | 22 | 51          | 16          | 0.90        |
| SLC6A3          | solute carrier family 6, member 3 (dopamine transporter)       | 5  | 140         | 27          | 0.89        |
| SNCA            | synuclein, alpha (non A4 component of amyloid precursor)       | 4  | 234         | 39          | 0.98        |
| TDO2            | tryptophan 2,3-dioxygenase                                     | 4  | 53          | 12          | 0.88        |
| TH              | tyrosine hydroxylase                                           | 11 | 52          | 16          | 0.81        |
| Total           |                                                                |    | <b>5926</b> | <b>1295</b> | <b>0.93</b> |

Web Table2: Association of the SNPs in dopamine pathway with smoking initiation in WSPT (Combining males and females)

| SNP        | Chr | Gene    | maf  | model | OR.CI           | p        | p <sub>adj</sub> |
|------------|-----|---------|------|-------|-----------------|----------|------------------|
| rs8192595  | 18  | ADCYAP1 | 0.08 | Add   | 0.76(0.59-0.98) | 3.79E-02 | 5.09E-01         |
| rs17579719 | 18  | ADCYAP1 | 0.08 | Dom   | 0.99(0.76-1.3)  | 9.61E-01 | 9.61E-01         |
| rs7228988  | 18  | ADCYAP1 | 0.08 | Dom   | 0.96(0.73-1.25) | 7.51E-01 | 9.76E-01         |
| rs9957039  | 18  | ADCYAP1 | 0.41 | Dom   | 1.07(0.88-1.31) | 4.89E-01 | 9.84E-01         |
| rs12961210 | 18  | ADCYAP1 | 0.21 | Rec   | 0.98(0.61-1.55) | 9.16E-01 | 9.93E-01         |
| rs12967004 | 18  | ADCYAP1 | 0.21 | Rec   | 0.98(0.61-1.55) | 9.16E-01 | 9.93E-01         |
| rs12608148 | 18  | ADCYAP1 | 0.32 | Add   | 0.96(0.83-1.11) | 5.91E-01 | 9.93E-01         |
| rs11665625 | 18  | ADCYAP1 | 0.41 | Dom   | 1.08(0.88-1.32) | 4.63E-01 | 9.94E-01         |
| rs2846578  | 18  | ADCYAP1 | 0.33 | Add   | 0.96(0.83-1.11) | 5.78E-01 | 9.95E-01         |
| rs12968039 | 18  | ADCYAP1 | 0.21 | Dom   | 1.12(0.92-1.37) | 2.57E-01 | 9.95E-01         |
| rs11663363 | 18  | ADCYAP1 | 0.03 | Add   | 0.82(0.55-1.22) | 3.28E-01 | 9.96E-01         |
| rs11081411 | 18  | ADCYAP1 | 0.21 | Dom   | 1.12(0.92-1.36) | 2.64E-01 | 9.96E-01         |
| rs10775442 | 18  | ADCYAP1 | 0.21 | Dom   | 1.12(0.92-1.36) | 2.68E-01 | 9.96E-01         |
| rs4798684  | 18  | ADCYAP1 | 0.21 | Dom   | 1.12(0.92-1.36) | 2.68E-01 | 9.96E-01         |
| rs1916610  | 18  | ADCYAP1 | 0.47 | Rec   | 0.93(0.73-1.17) | 5.28E-01 | 9.98E-01         |
| rs10853372 | 18  | ADCYAP1 | 0.49 | Add   | 0.92(0.8-1.06)  | 2.52E-01 | 9.98E-01         |
| rs10853365 | 18  | ADCYAP1 | 0.21 | Dom   | 1.14(0.93-1.38) | 2.04E-01 | 9.98E-01         |
| rs7241142  | 18  | ADCYAP1 | 0.21 | Dom   | 1.14(0.93-1.38) | 2.04E-01 | 9.98E-01         |
| rs4797328  | 18  | ADCYAP1 | 0.21 | Dom   | 1.14(0.93-1.38) | 2.04E-01 | 9.98E-01         |
| rs940196   | 18  | ADCYAP1 | 0.04 | Add   | 0.86(0.59-1.27) | 4.59E-01 | 9.98E-01         |
| rs4798767  | 18  | ADCYAP1 | 0.47 | Rec   | 0.87(0.69-1.1)  | 2.32E-01 | 9.98E-01         |
| rs11081461 | 18  | ADCYAP1 | 0.38 | Dom   | 1.12(0.92-1.37) | 2.43E-01 | 9.98E-01         |
| rs12373400 | 18  | ADCYAP1 | 0.38 | Dom   | 1.12(0.92-1.37) | 2.43E-01 | 9.98E-01         |
| rs11663168 | 18  | ADCYAP1 | 0.03 | Add   | 0.86(0.59-1.27) | 4.46E-01 | 9.99E-01         |
| rs2846584  | 18  | ADCYAP1 | 0.32 | Rec   | 0.87(0.63-1.21) | 4.11E-01 | 9.99E-01         |
| rs1599789  | 18  | ADCYAP1 | 0.21 | Dom   | 1.13(0.93-1.38) | 2.13E-01 | 9.99E-01         |
| rs17500692 | 18  | ADCYAP1 | 0.25 | Rec   | 0.78(0.53-1.17) | 2.30E-01 | 9.99E-01         |
| rs7242260  | 18  | ADCYAP1 | 0.25 | Rec   | 0.78(0.53-1.17) | 2.30E-01 | 9.99E-01         |
| rs11663172 | 18  | ADCYAP1 | 0.38 | Dom   | 1.13(0.93-1.38) | 2.24E-01 | 9.99E-01         |
| rs2846581  | 18  | ADCYAP1 | 0.33 | Add   | 0.95(0.82-1.1)  | 4.67E-01 | 9.99E-01         |
| rs11877293 | 18  | ADCYAP1 | 0.47 | Dom   | 1.09(0.88-1.35) | 4.47E-01 | 9.99E-01         |



|            |             |          |                 |          |          |
|------------|-------------|----------|-----------------|----------|----------|
| rs2846807  | 18 ADCYAP1  | 0.46 Dom | 1.11(0.9-1.37)  | 3.37E-01 | 9.99E-01 |
| rs9635870  | 18 ADCYAP1  | 0.45 Dom | 1.11(0.9-1.37)  | 3.40E-01 | 9.99E-01 |
| rs2040177  | 18 ADCYAP1  | 0.47 Dom | 1.07(0.86-1.33) | 5.34E-01 | 9.99E-01 |
| rs11081414 | 18 ADCYAP1  | 0.32 Add | 0.95(0.82-1.1)  | 5.22E-01 | 9.99E-01 |
| rs6506614  | 18 ADCYAP1  | 0.32 Add | 0.95(0.82-1.1)  | 5.22E-01 | 9.99E-01 |
| rs8093310  | 18 ADCYAP1  | 0.32 Add | 0.95(0.82-1.1)  | 5.22E-01 | 9.99E-01 |
| rs16952813 | 18 ADCYAP1  | 0.24 Dom | 1.1(0.91-1.34)  | 3.13E-01 | 9.99E-01 |
| rs2846583  | 18 ADCYAP1  | 0.33 Add | 0.94(0.82-1.09) | 4.30E-01 | 9.99E-01 |
| rs11659736 | 18 ADCYAP1  | 0.23 Rec | 0.82(0.52-1.28) | 3.75E-01 | 9.99E-01 |
| rs11660066 | 18 ADCYAP1  | 0.24 Dom | 1.1(0.91-1.34)  | 3.20E-01 | 9.99E-01 |
| rs4797325  | 18 ADCYAP1  | 0.48 Rec | 0.91(0.72-1.15) | 4.18E-01 | 1.00E+00 |
| rs17501915 | 18 ADCYAP1  | 0.14 Dom | 1.09(0.88-1.36) | 4.24E-01 | 1.00E+00 |
| rs17501755 | 18 ADCYAP1  | 0.14 Dom | 1.09(0.88-1.36) | 4.34E-01 | 1.00E+00 |
| rs17601612 | 11 ANKK1_DI | 0.03 Add | 1.64(1.09-2.45) | 1.73E-02 | 3.84E-01 |
| rs4245147  | 11 ANKK1_DI | 0.17 Dom | 1.3(1.06-1.6)   | 1.13E-02 | 4.24E-01 |
| rs4274224  | 11 ANKK1_DI | 0.17 Dom | 1.3(1.06-1.6)   | 1.13E-02 | 4.25E-01 |
| rs4245146  | 11 ANKK1_DI | 0.17 Dom | 1.3(1.06-1.6)   | 1.13E-02 | 4.26E-01 |
| rs4936271  | 11 ANKK1_DI | 0.17 Dom | 1.3(1.06-1.6)   | 1.13E-02 | 4.26E-01 |
| rs4630328  | 11 ANKK1_DI | 0.03 Add | 1.5(1-2.25)     | 4.78E-02 | 6.89E-01 |
| rs6589377  | 11 ANKK1_DI | 0.03 Add | 1.49(1-2.22)    | 4.88E-02 | 6.94E-01 |
| rs4581480  | 11 ANKK1_DI | 0.14 Dom | 1.27(1.02-1.57) | 3.11E-02 | 7.27E-01 |
| rs4936274  | 11 ANKK1_DI | 0.11 Dom | 1.29(1.02-1.63) | 3.14E-02 | 7.30E-01 |
| rs11214613 | 11 ANKK1_DI | 0.11 Dom | 1.29(1.02-1.63) | 3.14E-02 | 7.30E-01 |
| rs4460839  | 11 ANKK1_DI | 0.14 Dom | 1.26(1.01-1.56) | 3.73E-02 | 7.76E-01 |
| rs4245148  | 11 ANKK1_DI | 0.14 Dom | 1.26(1.01-1.56) | 3.86E-02 | 7.85E-01 |
| rs11601054 | 11 ANKK1_DI | 0.02 Add | 1.52(0.95-2.44) | 8.11E-02 | 8.42E-01 |
| rs11214611 | 11 ANKK1_DI | 0.39 Add | 0.88(0.77-1.01) | 7.40E-02 | 8.71E-01 |
| rs4936270  | 11 ANKK1_DI | 0.14 Dom | 1.23(0.99-1.53) | 5.62E-02 | 8.71E-01 |
| rs4648317  | 11 ANKK1_DI | 0.39 Add | 0.88(0.77-1.02) | 8.56E-02 | 8.93E-01 |
| rs10891551 | 11 ANKK1_DI | 0.39 Add | 0.88(0.77-1.02) | 8.56E-02 | 8.93E-01 |
| rs4648318  | 11 ANKK1_DI | 0.45 Dom | 1.05(0.85-1.29) | 6.80E-01 | 8.96E-01 |
| rs877137   | 11 ANKK1_DI | 0.05 Add | 1.28(0.92-1.76) | 1.40E-01 | 9.07E-01 |
| rs2734849  | 11 ANKK1_DI | 0.06 Dom | 1.26(0.93-1.71) | 1.41E-01 | 9.08E-01 |
| rs4938019  | 11 ANKK1_DI | 0.37 Add | 0.89(0.77-1.02) | 1.00E-01 | 9.25E-01 |

|            |             |          |                 |          |          |
|------------|-------------|----------|-----------------|----------|----------|
| rs4350392  | 11 ANKK1_DI | 0.37 Add | 0.89(0.77-1.02) | 1.03E-01 | 9.30E-01 |
| rs10891549 | 11 ANKK1_DI | 0.05 Add | 1.25(0.93-1.66) | 1.34E-01 | 9.30E-01 |
| rs12360992 | 11 ANKK1_DI | 0.06 Dom | 1.24(0.92-1.69) | 1.61E-01 | 9.34E-01 |
| rs11214596 | 11 ANKK1_DI | 0.06 Dom | 1.24(0.92-1.69) | 1.61E-01 | 9.35E-01 |
| rs6277     | 11 ANKK1_DI | 0.05 Add | 1.24(0.92-1.65) | 1.53E-01 | 9.50E-01 |
| rs2734838  | 11 ANKK1_DI | 0.05 Dom | 1.24(0.91-1.68) | 1.78E-01 | 9.51E-01 |
| rs2734839  | 11 ANKK1_DI | 0.05 Dom | 1.24(0.91-1.68) | 1.78E-01 | 9.51E-01 |
| rs2734837  | 11 ANKK1_DI | 0.05 Dom | 1.24(0.91-1.68) | 1.78E-01 | 9.51E-01 |
| rs1554929  | 11 ANKK1_DI | 0.05 Add | 1.23(0.92-1.64) | 1.56E-01 | 9.55E-01 |
| rs11604671 | 11 ANKK1_DI | 0.05 Add | 1.22(0.92-1.63) | 1.70E-01 | 9.65E-01 |
| rs754672   | 11 ANKK1_DI | 0.05 Add | 1.22(0.9-1.65)  | 1.98E-01 | 9.66E-01 |
| rs7125415  | 11 ANKK1_DI | 0.41 Dom | 0.95(0.77-1.16) | 5.88E-01 | 9.69E-01 |
| rs4587762  | 11 ANKK1_DI | 0.05 Add | 1.22(0.91-1.64) | 1.88E-01 | 9.75E-01 |
| rs10891546 | 11 ANKK1_DI | 0.46 Dom | 1.19(0.96-1.47) | 1.17E-01 | 9.77E-01 |
| rs4938016  | 11 ANKK1_DI | 0.46 Rec | 1.15(0.91-1.45) | 2.29E-01 | 9.80E-01 |
| rs7122246  | 11 ANKK1_DI | 0.05 Add | 1.21(0.9-1.63)  | 2.00E-01 | 9.80E-01 |
| rs7107223  | 11 ANKK1_DI | 0.05 Add | 1.2(0.89-1.62)  | 2.38E-01 | 9.82E-01 |
| rs7122454  | 11 ANKK1_DI | 0.39 Dom | 0.86(0.71-1.05) | 1.31E-01 | 9.83E-01 |
| rs1079596  | 11 ANKK1_DI | 0.44 Dom | 1.17(0.95-1.45) | 1.35E-01 | 9.84E-01 |
| rs17115439 | 11 ANKK1_DI | 0.45 Dom | 1.18(0.95-1.45) | 1.36E-01 | 9.84E-01 |
| rs11214598 | 11 ANKK1_DI | 0.46 Rec | 1.14(0.91-1.44) | 2.61E-01 | 9.84E-01 |
| rs1076563  | 11 ANKK1_DI | 0.05 Add | 1.19(0.88-1.59) | 2.59E-01 | 9.84E-01 |
| rs1116313  | 11 ANKK1_DI | 0.05 Add | 1.19(0.88-1.59) | 2.59E-01 | 9.84E-01 |
| rs4938015  | 11 ANKK1_DI | 0.45 Dom | 1.17(0.95-1.45) | 1.40E-01 | 9.85E-01 |
| rs2471854  | 11 ANKK1_DI | 0.44 Dom | 1.17(0.95-1.44) | 1.43E-01 | 9.85E-01 |
| rs4938013  | 11 ANKK1_DI | 0.45 Dom | 1.17(0.95-1.45) | 1.40E-01 | 9.85E-01 |
| rs7118900  | 11 ANKK1_DI | 0.41 Dom | 1.17(0.95-1.43) | 1.40E-01 | 9.85E-01 |
| rs10891544 | 11 ANKK1_DI | 0.04 Add | 1.21(0.87-1.69) | 2.59E-01 | 9.85E-01 |
| rs12364051 | 11 ANKK1_DI | 0.05 Add | 1.21(0.89-1.63) | 2.18E-01 | 9.85E-01 |
| rs10891552 | 11 ANKK1_DI | 0.37 Add | 0.9(0.78-1.03)  | 1.34E-01 | 9.85E-01 |
| rs11214589 | 11 ANKK1_DI | 0.05 Add | 1.19(0.88-1.61) | 2.65E-01 | 9.86E-01 |
| rs1800497  | 11 ANKK1_DI | 0.41 Dom | 1.16(0.94-1.42) | 1.57E-01 | 9.86E-01 |
| rs2734833  | 11 ANKK1_DI | 0.06 Add | 1.18(0.89-1.56) | 2.50E-01 | 9.86E-01 |
| rs4586205  | 11 ANKK1_DI | 0.44 Dom | 1.08(0.87-1.32) | 4.88E-01 | 9.87E-01 |

|            |             |          |                 |          |          |
|------------|-------------|----------|-----------------|----------|----------|
| rs2440390  | 11 ANKK1_DI | 0.04 Add | 0.82(0.58-1.17) | 2.70E-01 | 9.87E-01 |
| rs12574471 | 11 ANKK1_DI | 0.11 Dom | 1.19(0.94-1.51) | 1.44E-01 | 9.87E-01 |
| rs10891545 | 11 ANKK1_DI | 0.49 Rec | 0.85(0.67-1.06) | 1.49E-01 | 9.87E-01 |
| rs11214605 | 11 ANKK1_DI | 0.05 Dom | 1.06(0.76-1.48) | 7.18E-01 | 9.88E-01 |
| rs7123797  | 11 ANKK1_DI | 0.45 Dom | 1.16(0.94-1.44) | 1.70E-01 | 9.91E-01 |
| rs7945132  | 11 ANKK1_DI | 0.45 Dom | 1.16(0.94-1.43) | 1.75E-01 | 9.92E-01 |
| rs11214601 | 11 ANKK1_DI | 0.41 Dom | 1.15(0.94-1.41) | 1.78E-01 | 9.93E-01 |
| rs2283265  | 11 ANKK1_DI | 0.43 Dom | 1.15(0.94-1.42) | 1.80E-01 | 9.93E-01 |
| rs4938012  | 11 ANKK1_DI | 0.45 Dom | 1.16(0.94-1.43) | 1.80E-01 | 9.93E-01 |
| rs1799978  | 11 ANKK1_DI | 0.20 Rec | 1.1(0.68-1.77)  | 6.96E-01 | 9.94E-01 |
| rs2242592  | 11 ANKK1_DI | 0.47 Rec | 1.12(0.89-1.41) | 3.36E-01 | 9.94E-01 |
| rs1003641  | 11 ANKK1_DI | 0.47 Rec | 1.12(0.89-1.41) | 3.36E-01 | 9.94E-01 |
| rs11214602 | 11 ANKK1_DI | 0.47 Rec | 1.12(0.89-1.41) | 3.36E-01 | 9.94E-01 |
| rs2587550  | 11 ANKK1_DI | 0.47 Rec | 1.12(0.89-1.41) | 3.36E-01 | 9.94E-01 |
| rs17115583 | 11 ANKK1_DI | 0.42 Add | 0.95(0.83-1.09) | 4.75E-01 | 9.95E-01 |
| rs6275     | 11 ANKK1_DI | 0.47 Add | 1.08(0.95-1.24) | 2.44E-01 | 9.95E-01 |
| rs4648319  | 11 ANKK1_DI | 0.39 Dom | 1.09(0.89-1.33) | 3.96E-01 | 9.95E-01 |
| rs1124491  | 11 ANKK1_DI | 0.41 Dom | 1.14(0.93-1.4)  | 2.00E-01 | 9.96E-01 |
| rs4938014  | 11 ANKK1_DI | 0.49 Rec | 0.86(0.69-1.09) | 2.10E-01 | 9.96E-01 |
| rs12224538 | 11 ANKK1_DI | 0.49 Dom | 0.9(0.73-1.12)  | 3.59E-01 | 9.96E-01 |
| rs4590907  | 11 ANKK1_DI | 0.50 Dom | 0.9(0.73-1.12)  | 3.59E-01 | 9.96E-01 |
| rs2075652  | 11 ANKK1_DI | 0.42 Rec | 0.92(0.71-1.2)  | 5.51E-01 | 9.96E-01 |
| rs4938017  | 11 ANKK1_DI | 0.05 Add | 1.11(0.8-1.53)  | 5.45E-01 | 9.96E-01 |
| rs7131440  | 11 ANKK1_DI | 0.05 Add | 1.11(0.8-1.53)  | 5.45E-01 | 9.96E-01 |
| rs4436578  | 11 ANKK1_DI | 0.43 Rec | 0.93(0.73-1.19) | 5.74E-01 | 9.96E-01 |
| rs1079594  | 11 ANKK1_DI | 0.41 Dom | 1.14(0.93-1.4)  | 2.05E-01 | 9.97E-01 |
| rs1079595  | 11 ANKK1_DI | 0.41 Dom | 1.14(0.93-1.4)  | 2.05E-01 | 9.97E-01 |
| rs4938010  | 11 ANKK1_DI | 0.49 Add | 0.93(0.81-1.06) | 2.69E-01 | 9.97E-01 |
| rs1076560  | 11 ANKK1_DI | 0.43 Dom | 1.14(0.93-1.41) | 2.08E-01 | 9.97E-01 |
| rs2734842  | 11 ANKK1_DI | 0.47 Rec | 1.11(0.88-1.4)  | 3.74E-01 | 9.97E-01 |
| rs2734841  | 11 ANKK1_DI | 0.47 Rec | 1.11(0.88-1.4)  | 3.74E-01 | 9.97E-01 |
| rs6276     | 11 ANKK1_DI | 0.47 Rec | 1.11(0.88-1.4)  | 3.74E-01 | 9.97E-01 |
| rs4620755  | 11 ANKK1_DI | 0.42 Rec | 0.95(0.73-1.23) | 6.90E-01 | 9.97E-01 |
| rs12800853 | 11 ANKK1_DI | 0.05 Add | 1.09(0.8-1.47)  | 5.93E-01 | 9.97E-01 |

|            |             |          |                 |          |          |
|------------|-------------|----------|-----------------|----------|----------|
| rs2471857  | 11 ANKK1_DI | 0.44 Dom | 1.14(0.93-1.41) | 2.12E-01 | 9.97E-01 |
| rs1107162  | 11 ANKK1_DI | 0.05 Dom | 1.16(0.85-1.59) | 3.58E-01 | 9.97E-01 |
| rs7350522  | 11 ANKK1_DI | 0.39 Rec | 0.87(0.67-1.14) | 3.20E-01 | 9.97E-01 |
| rs2471851  | 11 ANKK1_DI | 0.39 Rec | 0.87(0.67-1.14) | 3.20E-01 | 9.97E-01 |
| rs2859545  | 11 ANKK1_DI | 0.47 Rec | 1.11(0.88-1.39) | 3.89E-01 | 9.98E-01 |
| rs877138   | 11 ANKK1_DI | 0.47 Dom | 1.14(0.92-1.42) | 2.19E-01 | 9.98E-01 |
| rs11214607 | 11 ANKK1_DI | 0.41 Rec | 0.87(0.67-1.13) | 3.06E-01 | 9.98E-01 |
| rs6279     | 11 ANKK1_DI | 0.47 Add | 1.09(0.95-1.25) | 2.26E-01 | 9.98E-01 |
| rs2245805  | 11 ANKK1_DI | 0.49 Add | 1.08(0.94-1.24) | 2.92E-01 | 9.98E-01 |
| rs7131056  | 11 ANKK1_DI | 0.43 Add | 1.05(0.92-1.21) | 4.62E-01 | 9.98E-01 |
| rs1076562  | 11 ANKK1_DI | 0.49 Add | 1.08(0.94-1.23) | 2.88E-01 | 9.98E-01 |
| rs4938011  | 11 ANKK1_DI | 0.49 Rec | 0.87(0.69-1.09) | 2.27E-01 | 9.98E-01 |
| rs1124492  | 11 ANKK1_DI | 0.49 Add | 0.94(0.82-1.08) | 4.00E-01 | 9.98E-01 |
| rs2734848  | 11 ANKK1_DI | 0.04 Add | 0.85(0.6-1.21)  | 3.74E-01 | 9.98E-01 |
| rs2002453  | 11 ANKK1_DI | 0.49 Add | 1.08(0.94-1.23) | 2.94E-01 | 9.98E-01 |
| rs12422191 | 11 ANKK1_DI | 0.03 Add | 0.85(0.56-1.3)  | 4.60E-01 | 9.98E-01 |
| rs1125394  | 11 ANKK1_DI | 0.44 Dom | 1.14(0.92-1.4)  | 2.34E-01 | 9.98E-01 |
| rs4601821  | 11 ANKK1_DI | 0.47 Dom | 1.12(0.91-1.39) | 2.84E-01 | 9.98E-01 |
| rs1124493  | 11 ANKK1_DI | 0.47 Rec | 1.1(0.87-1.38)  | 4.17E-01 | 9.98E-01 |
| rs2234689  | 11 ANKK1_DI | 0.04 Add | 0.87(0.62-1.24) | 4.51E-01 | 9.99E-01 |
| rs2005313  | 11 ANKK1_DI | 0.49 Dom | 1.14(0.91-1.42) | 2.48E-01 | 9.99E-01 |
| rs1079727  | 11 ANKK1_DI | 0.43 Dom | 1.13(0.92-1.39) | 2.47E-01 | 9.99E-01 |
| rs7103679  | 11 ANKK1_DI | 0.39 Dom | 1.1(0.9-1.35)   | 3.39E-01 | 9.99E-01 |
| rs1079597  | 11 ANKK1_DI | 0.43 Dom | 1.13(0.91-1.39) | 2.66E-01 | 9.99E-01 |
| rs3897584  | 11 ANKK1_DI | 0.46 Dom | 1.13(0.91-1.4)  | 2.66E-01 | 9.99E-01 |
| rs17529477 | 11 ANKK1_DI | 0.03 Add | 1.17(0.76-1.78) | 4.77E-01 | 9.99E-01 |
| rs2587548  | 11 ANKK1_DI | 0.05 Dom | 1.14(0.83-1.57) | 4.19E-01 | 9.99E-01 |
| rs10891541 | 11 ANKK1_DI | 0.49 Dom | 0.92(0.74-1.14) | 4.55E-01 | 9.99E-01 |
| rs2734836  | 11 ANKK1_DI | 0.44 Dom | 1.12(0.91-1.38) | 2.77E-01 | 9.99E-01 |
| rs2075654  | 11 ANKK1_DI | 0.43 Dom | 1.12(0.91-1.38) | 2.77E-01 | 9.99E-01 |
| rs7124442  | 11 BDNF     | 0.07 Add | 1.27(0.99-1.63) | 6.15E-02 | 5.45E-01 |
| rs7127507  | 11 BDNF     | 0.07 Add | 1.26(0.98-1.62) | 7.13E-02 | 5.95E-01 |
| rs11030121 | 11 BDNF     | 0.08 Dom | 1.25(0.95-1.63) | 1.06E-01 | 7.30E-01 |
| rs4923468  | 11 BDNF     | 0.02 Dom | 1.41(0.92-2.16) | 1.19E-01 | 7.94E-01 |

|            |         |          |                 |          |          |
|------------|---------|----------|-----------------|----------|----------|
| rs1519480  | 11 BDNF | 0.25 Add | 1.15(0.99-1.34) | 7.45E-02 | 8.13E-01 |
| rs10835210 | 11 BDNF | 0.27 Rec | 0.92(0.64-1.33) | 6.69E-01 | 8.89E-01 |
| rs12419948 | 11 BDNF | 0.47 Add | 0.9(0.79-1.03)  | 1.35E-01 | 8.90E-01 |
| rs10501087 | 11 BDNF | 0.47 Add | 0.9(0.79-1.03)  | 1.37E-01 | 8.93E-01 |
| rs2030323  | 11 BDNF | 0.47 Add | 0.9(0.79-1.03)  | 1.41E-01 | 9.00E-01 |
| rs10767664 | 11 BDNF | 0.47 Dom | 0.85(0.69-1.05) | 1.27E-01 | 9.00E-01 |
| rs1013402  | 11 BDNF | 0.05 Dom | 1.24(0.9-1.71)  | 1.83E-01 | 9.03E-01 |
| rs11030101 | 11 BDNF | 0.27 Rec | 0.89(0.61-1.29) | 5.30E-01 | 9.05E-01 |
| rs988748   | 11 BDNF | 0.47 Add | 0.91(0.79-1.04) | 1.48E-01 | 9.09E-01 |
| rs925947   | 11 BDNF | 0.47 Add | 0.91(0.79-1.04) | 1.50E-01 | 9.13E-01 |
| rs925946   | 11 BDNF | 0.05 Dom | 1.22(0.89-1.68) | 2.19E-01 | 9.14E-01 |
| rs10767658 | 11 BDNF | 0.05 Dom | 1.22(0.89-1.68) | 2.19E-01 | 9.14E-01 |
| rs11030119 | 11 BDNF | 0.05 Dom | 1.22(0.89-1.68) | 2.17E-01 | 9.14E-01 |
| rs7103411  | 11 BDNF | 0.48 Add | 0.9(0.79-1.03)  | 1.31E-01 | 9.15E-01 |
| rs6484320  | 11 BDNF | 0.48 Add | 0.9(0.79-1.03)  | 1.31E-01 | 9.15E-01 |
| rs16917237 | 11 BDNF | 0.48 Add | 0.9(0.79-1.03)  | 1.31E-01 | 9.15E-01 |
| rs2049048  | 11 BDNF | 0.06 Dom | 0.82(0.6-1.12)  | 2.08E-01 | 9.15E-01 |
| rs962369   | 11 BDNF | 0.05 Dom | 1.22(0.89-1.67) | 2.23E-01 | 9.16E-01 |
| rs11030104 | 11 BDNF | 0.48 Dom | 0.89(0.72-1.09) | 2.63E-01 | 9.24E-01 |
| rs11030108 | 11 BDNF | 0.05 Dom | 1.21(0.88-1.66) | 2.42E-01 | 9.31E-01 |
| rs1401635  | 11 BDNF | 0.05 Dom | 1.21(0.88-1.66) | 2.42E-01 | 9.31E-01 |
| rs7931247  | 11 BDNF | 0.47 Rec | 1.05(0.83-1.32) | 6.84E-01 | 9.35E-01 |
| rs1519479  | 11 BDNF | 0.28 Rec | 0.91(0.64-1.32) | 6.31E-01 | 9.56E-01 |
| rs2203877  | 11 BDNF | 0.28 Rec | 0.91(0.64-1.32) | 6.31E-01 | 9.56E-01 |
| rs6265     | 11 BDNF | 0.48 Dom | 0.91(0.73-1.12) | 3.65E-01 | 9.70E-01 |
| rs1491850  | 11 BDNF | 0.45 Rec | 0.89(0.71-1.13) | 3.56E-01 | 9.72E-01 |
| rs7940188  | 11 BDNF | 0.17 Rec | 1.13(0.65-1.94) | 6.70E-01 | 9.74E-01 |
| rs16917234 | 11 BDNF | 0.17 Rec | 1.13(0.65-1.94) | 6.70E-01 | 9.74E-01 |
| rs12273539 | 11 BDNF | 0.17 Rec | 1.13(0.65-1.94) | 6.70E-01 | 9.74E-01 |
| rs12291063 | 11 BDNF | 0.17 Rec | 1.13(0.65-1.94) | 6.70E-01 | 9.74E-01 |
| rs12291186 | 11 BDNF | 0.17 Rec | 1.13(0.65-1.94) | 6.70E-01 | 9.74E-01 |
| rs908867   | 11 BDNF | 0.04 Dom | 1.16(0.81-1.65) | 4.21E-01 | 9.89E-01 |
| rs11030123 | 11 BDNF | 0.04 Dom | 1.16(0.81-1.65) | 4.21E-01 | 9.89E-01 |
| rs7103873  | 11 BDNF | 0.45 Dom | 1.05(0.85-1.29) | 6.64E-01 | 9.90E-01 |

|            |          |          |                 |          |          |
|------------|----------|----------|-----------------|----------|----------|
| rs10767665 | 11 BDNF  | 0.45 Dom | 1.05(0.85-1.29) | 6.54E-01 | 9.90E-01 |
| rs7934165  | 11 BDNF  | 0.45 Dom | 1.05(0.85-1.29) | 6.54E-01 | 9.90E-01 |
| rs2030324  | 11 BDNF  | 0.45 Dom | 1.05(0.85-1.29) | 6.54E-01 | 9.90E-01 |
| rs11030107 | 11 BDNF  | 0.05 Dom | 0.89(0.63-1.25) | 4.88E-01 | 9.91E-01 |
| rs7927728  | 11 BDNF  | 0.04 Dom | 1.13(0.8-1.59)  | 4.89E-01 | 9.91E-01 |
| rs11030098 | 11 BDNF  | 0.17 Add | 1.08(0.9-1.29)  | 4.15E-01 | 9.92E-01 |
| rs7102921  | 11 BDNF  | 0.17 Add | 1.08(0.9-1.29)  | 4.15E-01 | 9.92E-01 |
| rs2049046  | 11 BDNF  | 0.45 Rec | 1.06(0.84-1.34) | 6.11E-01 | 9.93E-01 |
| rs16917271 | 11 BDNF  | 0.18 Add | 1.08(0.91-1.29) | 3.70E-01 | 9.93E-01 |
| rs11629265 | 14 CALM1 | 0.18 Rec | 1.86(1.1-3.14)  | 2.06E-02 | 4.37E-01 |
| rs12885713 | 14 CALM1 | 0.18 Rec | 1.76(1.05-2.93) | 3.14E-02 | 5.63E-01 |
| rs3213718  | 14 CALM1 | 0.19 Rec | 1.68(1.04-2.72) | 3.50E-02 | 5.93E-01 |
| rs2300500  | 14 CALM1 | 0.17 Rec | 1.74(1.03-2.93) | 3.71E-02 | 6.01E-01 |
| rs2300496  | 14 CALM1 | 0.17 Rec | 1.74(1.03-2.93) | 3.71E-02 | 6.01E-01 |
| rs3179089  | 14 CALM1 | 0.17 Rec | 1.74(1.03-2.93) | 3.71E-02 | 6.01E-01 |
| rs6575134  | 14 CALM1 | 0.09 Add | 1.02(0.81-1.29) | 8.75E-01 | 8.75E-01 |
| rs12433818 | 14 CALM1 | 0.47 Dom | 0.86(0.7-1.06)  | 1.63E-01 | 9.39E-01 |
| rs12895068 | 14 CALM1 | 0.47 Dom | 0.86(0.7-1.06)  | 1.63E-01 | 9.39E-01 |
| rs3814843  | 14 CALM1 | 0.09 Dom | 1.02(0.79-1.32) | 8.66E-01 | 9.40E-01 |
| rs7147045  | 14 CALM1 | 0.02 Add | 0.74(0.44-1.24) | 2.53E-01 | 9.41E-01 |
| rs12891145 | 14 CALM1 | 0.21 Rec | 1.4(0.88-2.23)  | 1.51E-01 | 9.47E-01 |
| rs5871     | 14 CALM1 | 0.39 Dom | 1.09(0.89-1.33) | 3.91E-01 | 9.49E-01 |
| rs8006462  | 14 CALM1 | 0.16 Dom | 0.94(0.76-1.17) | 5.96E-01 | 9.69E-01 |
| rs10129175 | 14 CALM1 | 0.37 Add | 0.94(0.82-1.09) | 4.03E-01 | 9.78E-01 |
| rs2896135  | 14 CALM1 | 0.22 Dom | 0.91(0.75-1.11) | 3.56E-01 | 9.83E-01 |
| rs2110114  | 14 CALM1 | 0.21 Dom | 0.98(0.8-1.19)  | 8.42E-01 | 9.86E-01 |
| rs2300497  | 14 CALM1 | 0.21 Dom | 0.98(0.8-1.19)  | 8.42E-01 | 9.86E-01 |
| rs6575131  | 14 CALM1 | 0.21 Dom | 0.98(0.8-1.19)  | 8.42E-01 | 9.86E-01 |
| rs2300502  | 14 CALM1 | 0.21 Dom | 0.98(0.8-1.19)  | 8.42E-01 | 9.86E-01 |
| rs2110113  | 14 CALM1 | 0.21 Dom | 0.98(0.8-1.19)  | 8.42E-01 | 9.86E-01 |
| rs759062   | 14 CALM1 | 0.16 Rec | 0.84(0.46-1.53) | 5.68E-01 | 9.90E-01 |
| rs876259   | 14 CALM1 | 0.37 Dom | 0.91(0.75-1.1)  | 3.34E-01 | 9.92E-01 |
| rs4904690  | 14 CALM1 | 0.37 Dom | 0.9(0.74-1.09)  | 2.93E-01 | 9.92E-01 |
| rs2268433  | 14 CALM1 | 0.23 Rec | 0.86(0.54-1.37) | 5.24E-01 | 9.93E-01 |

|            |          |          |                 |          |          |
|------------|----------|----------|-----------------|----------|----------|
| rs3814847  | 14 CALM1 | 0.23 Dom | 0.94(0.77-1.14) | 5.20E-01 | 9.94E-01 |
| rs2303928  | 7 CDK5   | 0.30 Add | 0.86(0.75-1)    | 5.36E-02 | 6.59E-01 |
| rs2069456  | 7 CDK5   | 0.34 Rec | 1.24(0.93-1.67) | 1.48E-01 | 9.45E-01 |
| rs1549760  | 7 CDK5   | 0.28 Rec | 0.95(0.67-1.35) | 7.88E-01 | 9.54E-01 |
| rs2303933  | 7 CDK5   | 0.26 Add | 1.11(0.95-1.29) | 1.81E-01 | 9.66E-01 |
| rs2303937  | 7 CDK5   | 0.42 Add | 0.93(0.81-1.06) | 2.77E-01 | 9.66E-01 |
| rs2303936  | 7 CDK5   | 0.01 Add | 0.75(0.4-1.4)   | 3.66E-01 | 9.76E-01 |
| rs2069443  | 7 CDK5   | 0.30 Add | 0.96(0.83-1.11) | 6.08E-01 | 9.91E-01 |
| rs2303929  | 7 CDK5   | 0.30 Dom | 0.97(0.8-1.17)  | 7.27E-01 | 9.94E-01 |
| rs11765015 | 7 CDK5   | 0.39 Dom | 0.95(0.78-1.15) | 5.81E-01 | 9.94E-01 |
| rs891507   | 7 CDK5   | 0.05 Dom | 1.02(0.74-1.41) | 9.01E-01 | 9.97E-01 |
| rs1549759  | 7 CDK5   | 0.05 Dom | 1.02(0.74-1.41) | 9.01E-01 | 9.97E-01 |
| rs2069459  | 7 CDK5   | 0.37 Rec | 1.09(0.82-1.46) | 5.36E-01 | 9.98E-01 |
| rs2288645  | 7 CDK5   | 0.22 Dom | 0.93(0.76-1.13) | 4.44E-01 | 9.99E-01 |
| rs3793336  | 7 CDK5   | 0.06 Dom | 1.08(0.8-1.46)  | 5.95E-01 | 9.99E-01 |
| rs2303934  | 7 CDK5   | 0.11 Add | 0.95(0.77-1.19) | 6.73E-01 | 9.99E-01 |
| rs6558000  | 8 CHRNA2 | 0.12 Rec | 0.36(0.15-0.85) | 2.02E-02 | 3.19E-01 |
| rs876891   | 8 CHRNA2 | 0.12 Rec | 0.39(0.16-0.93) | 3.34E-02 | 4.85E-01 |
| rs2278319  | 8 CHRNA2 | 0.18 Dom | 1.02(0.83-1.25) | 8.44E-01 | 8.44E-01 |
| rs1106359  | 8 CHRNA2 | 0.19 Dom | 1.19(0.97-1.45) | 8.71E-02 | 8.75E-01 |
| rs2472554  | 8 CHRNA2 | 0.19 Dom | 1.19(0.97-1.45) | 9.53E-02 | 9.11E-01 |
| rs751018   | 8 CHRNA2 | 0.19 Add | 1.15(0.97-1.37) | 9.78E-02 | 9.17E-01 |
| rs2251430  | 8 CHRNA2 | 0.50 Add | 1.12(0.98-1.28) | 1.02E-01 | 9.22E-01 |
| rs891393   | 8 CHRNA2 | 0.50 Add | 1.12(0.98-1.28) | 1.02E-01 | 9.23E-01 |
| rs1583092  | 8 CHRNA2 | 0.50 Dom | 0.87(0.7-1.08)  | 2.11E-01 | 9.33E-01 |
| rs2565065  | 8 CHRNA2 | 0.19 Dom | 1.18(0.96-1.44) | 1.07E-01 | 9.34E-01 |
| rs2292977  | 8 CHRNA2 | 0.50 Add | 1.12(0.97-1.28) | 1.16E-01 | 9.44E-01 |
| rs1879182  | 8 CHRNA2 | 0.50 Add | 0.9(0.78-1.03)  | 1.16E-01 | 9.44E-01 |
| rs748282   | 8 CHRNA2 | 0.50 Add | 0.9(0.78-1.03)  | 1.16E-01 | 9.44E-01 |
| rs1879181  | 8 CHRNA2 | 0.50 Add | 0.9(0.78-1.03)  | 1.16E-01 | 9.44E-01 |
| rs2292976  | 8 CHRNA2 | 0.50 Dom | 0.87(0.7-1.09)  | 2.25E-01 | 9.45E-01 |
| rs748281   | 8 CHRNA2 | 0.50 Add | 0.9(0.78-1.03)  | 1.22E-01 | 9.49E-01 |
| rs2280375  | 8 CHRNA2 | 0.50 Add | 0.9(0.78-1.03)  | 1.22E-01 | 9.50E-01 |
| rs7007145  | 8 CHRNA2 | 0.19 Add | 1.14(0.97-1.35) | 1.22E-01 | 9.52E-01 |

|            |          |          |                 |          |          |
|------------|----------|----------|-----------------|----------|----------|
| rs1879184  | 8 CHRNA2 | 0.50 Add | 0.9(0.78-1.03)  | 1.27E-01 | 9.56E-01 |
| rs919494   | 8 CHRNA2 | 0.19 Add | 1.14(0.96-1.35) | 1.25E-01 | 9.56E-01 |
| rs891394   | 8 CHRNA2 | 0.19 Rec | 1.17(0.7-1.96)  | 5.45E-01 | 9.57E-01 |
| rs2271920  | 8 CHRNA2 | 0.19 Add | 1.13(0.96-1.34) | 1.51E-01 | 9.60E-01 |
| rs10093964 | 8 CHRNA2 | 0.19 Add | 1.14(0.96-1.35) | 1.31E-01 | 9.61E-01 |
| rs2565067  | 8 CHRNA2 | 0.19 Dom | 1.17(0.95-1.42) | 1.35E-01 | 9.63E-01 |
| rs2099166  | 8 CHRNA2 | 0.47 Add | 0.91(0.8-1.05)  | 1.98E-01 | 9.64E-01 |
| rs2565062  | 8 CHRNA2 | 0.47 Add | 0.91(0.79-1.04) | 1.62E-01 | 9.65E-01 |
| rs1057137  | 8 CHRNA2 | 0.19 Dom | 1.16(0.95-1.42) | 1.42E-01 | 9.67E-01 |
| rs2565045  | 8 CHRNA2 | 0.19 Dom | 1.16(0.95-1.42) | 1.40E-01 | 9.68E-01 |
| rs7815010  | 8 CHRNA2 | 0.45 Rec | 0.84(0.66-1.07) | 1.60E-01 | 9.69E-01 |
| rs1864375  | 8 CHRNA2 | 0.47 Add | 0.92(0.8-1.05)  | 2.10E-01 | 9.71E-01 |
| rs891399   | 8 CHRNA2 | 0.47 Rec | 0.85(0.67-1.07) | 1.59E-01 | 9.71E-01 |
| rs3735757  | 8 CHRNA2 | 0.47 Dom | 0.91(0.73-1.12) | 3.71E-01 | 9.87E-01 |
| rs3824103  | 8 CHRNA2 | 0.47 Dom | 0.91(0.74-1.12) | 3.70E-01 | 9.87E-01 |
| rs9314347  | 8 CHRNA2 | 0.04 Add | 1.05(0.74-1.49) | 7.77E-01 | 9.89E-01 |
| rs2472553  | 8 CHRNA2 | 0.47 Add | 0.93(0.81-1.07) | 2.91E-01 | 9.91E-01 |
| rs2565055  | 8 CHRNA2 | 0.19 Add | 0.91(0.76-1.07) | 2.58E-01 | 9.92E-01 |
| rs2565061  | 8 CHRNA2 | 0.46 Dom | 0.91(0.74-1.13) | 4.04E-01 | 9.92E-01 |
| rs2292975  | 8 CHRNA2 | 0.31 Dom | 1.09(0.9-1.32)  | 3.79E-01 | 9.93E-01 |
| rs1560344  | 8 CHRNA2 | 0.31 Dom | 1.08(0.89-1.3)  | 4.55E-01 | 9.95E-01 |
| rs2280376  | 8 CHRNA2 | 0.18 Add | 1.04(0.87-1.24) | 6.59E-01 | 9.95E-01 |
| rs748283   | 8 CHRNA2 | 0.31 Dom | 1.07(0.89-1.3)  | 4.63E-01 | 9.95E-01 |
| rs747111   | 8 CHRNA2 | 0.18 Rec | 1.28(0.75-2.18) | 3.72E-01 | 9.96E-01 |
| rs751019   | 8 CHRNA2 | 0.31 Dom | 1.06(0.88-1.29) | 5.27E-01 | 9.96E-01 |
| rs4733065  | 8 CHRNA2 | 0.31 Add | 1.03(0.89-1.19) | 7.40E-01 | 9.96E-01 |
| rs2741343  | 8 CHRNA2 | 0.35 Rec | 1.1(0.82-1.48)  | 5.11E-01 | 9.97E-01 |
| rs2741342  | 8 CHRNA2 | 0.46 Add | 0.94(0.82-1.07) | 3.42E-01 | 9.97E-01 |
| rs2043063  | 8 CHRNA2 | 0.47 Dom | 0.93(0.75-1.14) | 4.73E-01 | 9.97E-01 |
| rs2322584  | 8 CHRNA2 | 0.47 Dom | 0.93(0.75-1.14) | 4.73E-01 | 9.97E-01 |
| rs2163177  | 8 CHRNA2 | 0.47 Dom | 0.93(0.75-1.14) | 4.73E-01 | 9.97E-01 |
| rs2322583  | 8 CHRNA2 | 0.47 Dom | 0.93(0.75-1.14) | 4.73E-01 | 9.97E-01 |
| rs2292974  | 8 CHRNA2 | 0.31 Dom | 1.08(0.89-1.31) | 4.20E-01 | 9.97E-01 |
| rs752993   | 8 CHRNA2 | 0.31 Dom | 1.08(0.89-1.31) | 4.19E-01 | 9.97E-01 |



|            |             |          |                 |          |          |
|------------|-------------|----------|-----------------|----------|----------|
| rs2741339  | 8 CHRNA2    | 0.20 Add | 0.92(0.78-1.09) | 3.38E-01 | 9.97E-01 |
| rs2741337  | 8 CHRNA2    | 0.20 Dom | 0.9(0.73-1.1)   | 2.88E-01 | 9.97E-01 |
| rs2741338  | 8 CHRNA2    | 0.20 Dom | 0.9(0.73-1.1)   | 2.88E-01 | 9.97E-01 |
| rs735421   | 8 CHRNA2    | 0.19 Rec | 1.16(0.7-1.92)  | 5.71E-01 | 9.97E-01 |
| rs891398   | 8 CHRNA2    | 0.37 Rec | 1.06(0.81-1.4)  | 6.74E-01 | 9.97E-01 |
| rs2741335  | 8 CHRNA2    | 0.20 Add | 0.92(0.78-1.09) | 3.26E-01 | 9.97E-01 |
| rs2565056  | 8 CHRNA2    | 0.19 Add | 0.92(0.77-1.09) | 3.27E-01 | 9.98E-01 |
| rs2565059  | 8 CHRNA2    | 0.08 Dom | 0.92(0.7-1.21)  | 5.56E-01 | 9.98E-01 |
| rs2322581  | 8 CHRNA2    | 0.47 Dom | 0.93(0.75-1.15) | 5.09E-01 | 9.98E-01 |
| rs2273505  | 20 CHRNA4   | 0.13 Dom | 1.38(1.11-1.72) | 3.61E-03 | 7.04E-02 |
| rs3787138  | 20 CHRNA4   | 0.14 Dom | 1.36(1.1-1.68)  | 4.93E-03 | 9.00E-02 |
| rs755204   | 20 CHRNA4   | 0.14 Dom | 1.33(1.08-1.65) | 8.34E-03 | 1.40E-01 |
| rs3787140  | 20 CHRNA4   | 0.14 Dom | 1.34(1.08-1.66) | 8.61E-03 | 1.40E-01 |
| rs6011776  | 20 CHRNA4   | 0.14 Dom | 1.33(1.07-1.65) | 9.61E-03 | 1.52E-01 |
| rs3787137  | 20 CHRNA4   | 0.36 Add | 0.86(0.74-0.99) | 3.11E-02 | 2.67E-01 |
| rs2236196  | 20 CHRNA4   | 0.15 Dom | 1.28(1.04-1.59) | 2.13E-02 | 2.77E-01 |
| rs1044396  | 20 CHRNA4   | 0.25 Dom | 0.81(0.66-0.98) | 3.05E-02 | 3.11E-01 |
| rs755203   | 20 CHRNA4   | 0.37 Add | 0.87(0.75-1)    | 4.58E-02 | 3.84E-01 |
| rs4809538  | 20 CHRNA4   | 0.41 Add | 1.09(0.95-1.25) | 1.98E-01 | 7.70E-01 |
| rs4809549  | 20 CHRNA4   | 0.38 Rec | 1.19(0.92-1.55) | 1.89E-01 | 8.40E-01 |
| rs9680065  | 20 CHRNA4   | 0.43 Rec | 1.08(0.84-1.39) | 5.33E-01 | 8.57E-01 |
| rs4603829  | 20 CHRNA4   | 0.43 Rec | 1.08(0.84-1.39) | 5.33E-01 | 8.57E-01 |
| rs2273504  | 20 CHRNA4   | 0.48 Rec | 1.13(0.9-1.42)  | 2.88E-01 | 8.61E-01 |
| rs2093107  | 20 CHRNA4   | 0.49 Rec | 1.04(0.83-1.3)  | 7.09E-01 | 9.13E-01 |
| rs4522666  | 20 CHRNA4   | 0.43 Dom | 0.96(0.78-1.18) | 7.02E-01 | 9.89E-01 |
| rs11072773 | 15 CHRNA5_C | 0.02 Dom | 0.98(0.6-1.58)  | 9.20E-01 | 9.60E-01 |
| rs8040868  | 15 CHRNA5_C | 0.34 Dom | 0.86(0.71-1.05) | 1.36E-01 | 9.97E-01 |
| rs1878399  | 15 CHRNA5_C | 0.19 Add | 0.99(0.84-1.18) | 9.50E-01 | 9.98E-01 |
| rs7180002  | 15 CHRNA5_C | 0.03 Add | 0.81(0.55-1.18) | 2.71E-01 | 9.99E-01 |
| rs11633223 | 15 CHRNA5_C | 0.09 Dom | 0.87(0.68-1.12) | 2.81E-01 | 9.99E-01 |
| rs10519205 | 15 CHRNA5_C | 0.07 Add | 0.87(0.66-1.15) | 3.32E-01 | 9.99E-01 |
| rs951266   | 15 CHRNA5_C | 0.03 Add | 0.81(0.55-1.19) | 2.87E-01 | 9.99E-01 |
| rs16969949 | 15 CHRNA5_C | 0.07 Add | 0.87(0.66-1.15) | 3.38E-01 | 9.99E-01 |
| rs1875869  | 15 CHRNA5_C | 0.07 Add | 0.87(0.66-1.15) | 3.38E-01 | 9.99E-01 |

|            |             |          |                 |          |          |
|------------|-------------|----------|-----------------|----------|----------|
| rs1317286  | 15 CHRNA5_C | 0.10 Dom | 0.85(0.66-1.08) | 1.83E-01 | 9.99E-01 |
| rs3971872  | 15 CHRNA5_C | 0.20 Add | 1.1(0.93-1.31)  | 2.63E-01 | 9.99E-01 |
| rs12440014 | 15 CHRNA5_C | 0.47 Rec | 1.17(0.93-1.47) | 1.69E-01 | 9.99E-01 |
| rs16969948 | 15 CHRNA5_C | 0.07 Add | 0.88(0.66-1.16) | 3.50E-01 | 9.99E-01 |
| rs7163480  | 15 CHRNA5_C | 0.07 Dom | 0.87(0.65-1.16) | 3.35E-01 | 1.00E+00 |
| rs637137   | 15 CHRNA5_C | 0.48 Rec | 1.04(0.83-1.3)  | 7.50E-01 | 1.00E+00 |
| rs7178897  | 15 CHRNA5_C | 0.07 Add | 0.88(0.67-1.17) | 3.90E-01 | 1.00E+00 |
| rs667282   | 15 CHRNA5_C | 0.48 Rec | 1.04(0.83-1.3)  | 7.47E-01 | 1.00E+00 |
| rs7178270  | 15 CHRNA5_C | 0.39 Rec | 0.85(0.64-1.11) | 2.31E-01 | 1.00E+00 |
| rs1316971  | 15 CHRNA5_C | 0.21 Dom | 0.92(0.76-1.13) | 4.34E-01 | 1.00E+00 |
| rs3743073  | 15 CHRNA5_C | 0.45 Rec | 0.87(0.68-1.11) | 2.61E-01 | 1.00E+00 |
| rs950776   | 15 CHRNA5_C | 0.14 Rec | 1.46(0.78-2.71) | 2.38E-01 | 1.00E+00 |
| rs16969968 | 15 CHRNA5_C | 0.03 Add | 0.86(0.58-1.26) | 4.36E-01 | 1.00E+00 |
| rs692780   | 15 CHRNA5_C | 0.19 Rec | 1.33(0.83-2.15) | 2.37E-01 | 1.00E+00 |
| rs495956   | 15 CHRNA5_C | 0.24 Rec | 1.25(0.84-1.87) | 2.76E-01 | 1.00E+00 |
| rs871058   | 15 CHRNA5_C | 0.12 Rec | 1.52(0.72-3.21) | 2.68E-01 | 1.00E+00 |
| rs481134   | 15 CHRNA5_C | 0.17 Rec | 1.19(0.71-2.01) | 5.04E-01 | 1.00E+00 |
| rs1051730  | 15 CHRNA5_C | 0.03 Add | 0.86(0.57-1.3)  | 4.80E-01 | 1.00E+00 |
| rs514743   | 15 CHRNA5_C | 0.19 Rec | 1.29(0.8-2.08)  | 2.98E-01 | 1.00E+00 |
| rs615470   | 15 CHRNA5_C | 0.19 Rec | 1.29(0.8-2.08)  | 2.98E-01 | 1.00E+00 |
| rs660652   | 15 CHRNA5_C | 0.19 Rec | 1.29(0.8-2.08)  | 2.98E-01 | 1.00E+00 |
| rs472054   | 15 CHRNA5_C | 0.19 Rec | 1.29(0.8-2.08)  | 2.98E-01 | 1.00E+00 |
| rs680244   | 15 CHRNA5_C | 0.24 Rec | 1.23(0.82-1.84) | 3.10E-01 | 1.00E+00 |
| rs17487223 | 15 CHRNA5_C | 0.03 Add | 0.97(0.64-1.49) | 9.05E-01 | 1.00E+00 |
| rs569207   | 15 CHRNA5_C | 0.48 Rec | 1.05(0.84-1.31) | 6.86E-01 | 1.00E+00 |
| rs8042374  | 15 CHRNA5_C | 0.29 Dom | 0.92(0.76-1.11) | 3.93E-01 | 1.00E+00 |
| rs7177514  | 15 CHRNA5_C | 0.29 Dom | 0.92(0.76-1.11) | 3.93E-01 | 1.00E+00 |
| rs8042059  | 15 CHRNA5_C | 0.29 Dom | 0.92(0.76-1.11) | 3.93E-01 | 1.00E+00 |
| rs4887069  | 15 CHRNA5_C | 0.29 Dom | 0.92(0.76-1.11) | 3.93E-01 | 1.00E+00 |
| rs6495308  | 15 CHRNA5_C | 0.29 Dom | 0.92(0.76-1.11) | 3.93E-01 | 1.00E+00 |
| rs11072768 | 15 CHRNA5_C | 0.21 Rec | 0.87(0.56-1.36) | 5.47E-01 | 1.00E+00 |
| rs12441998 | 15 CHRNA5_C | 0.21 Rec | 0.87(0.56-1.36) | 5.47E-01 | 1.00E+00 |
| rs621849   | 15 CHRNA5_C | 0.25 Rec | 1.19(0.8-1.77)  | 4.02E-01 | 1.00E+00 |
| rs7173512  | 15 CHRNA5_C | 0.17 Rec | 1.27(0.74-2.16) | 3.85E-01 | 1.00E+00 |

|            |             |          |                 |          |          |
|------------|-------------|----------|-----------------|----------|----------|
| rs4275821  | 15 CHRNA5_C | 0.17 Rec | 1.27(0.74-2.16) | 3.85E-01 | 1.00E+00 |
| rs601079   | 15 CHRNA5_C | 0.25 Rec | 1.15(0.77-1.73) | 4.97E-01 | 1.00E+00 |
| rs11637630 | 15 CHRNA5_C | 0.46 Add | 1.05(0.92-1.21) | 4.40E-01 | 1.00E+00 |
| rs17408276 | 15 CHRNA5_C | 0.19 Rec | 1.26(0.78-2.05) | 3.41E-01 | 1.00E+00 |
| rs938682   | 15 CHRNA5_C | 0.46 Rec | 1.12(0.89-1.41) | 3.39E-01 | 1.00E+00 |
| rs3743075  | 15 CHRNA5_C | 0.44 Dom | 1.09(0.88-1.34) | 4.35E-01 | 1.00E+00 |
| rs3743072  | 15 CHRNA5_C | 0.06 Dom | 0.94(0.69-1.27) | 6.77E-01 | 1.00E+00 |
| rs1948     | 15 CHRNA5_C | 0.47 Rec | 0.9(0.72-1.14)  | 3.93E-01 | 1.00E+00 |
| rs3743078  | 15 CHRNA5_C | 0.23 Rec | 0.91(0.6-1.37)  | 6.45E-01 | 1.00E+00 |
| rs11636753 | 15 CHRNA5_C | 0.18 Rec | 1.16(0.7-1.94)  | 5.67E-01 | 1.00E+00 |
| rs11636605 | 15 CHRNA5_C | 0.21 Rec | 0.91(0.58-1.44) | 6.98E-01 | 1.00E+00 |
| rs2869546  | 15 CHRNA5_C | 0.19 Rec | 1.18(0.73-1.89) | 4.97E-01 | 1.00E+00 |
| rs588765   | 15 CHRNA5_C | 0.18 Rec | 1.16(0.69-1.95) | 5.81E-01 | 1.00E+00 |
| rs6495306  | 15 CHRNA5_C | 0.18 Rec | 1.16(0.69-1.95) | 5.81E-01 | 1.00E+00 |
| rs3743074  | 15 CHRNA5_C | 0.44 Dom | 1.08(0.88-1.33) | 4.70E-01 | 1.00E+00 |
| rs11637635 | 15 CHRNA5_C | 0.17 Add | 1.06(0.89-1.26) | 5.40E-01 | 1.00E+00 |
| rs647041   | 15 CHRNA5_C | 0.19 Rec | 1.11(0.69-1.78) | 6.72E-01 | 1.00E+00 |
| rs3743076  | 15 CHRNA5_C | 0.25 Rec | 0.94(0.61-1.46) | 7.91E-01 | 1.00E+00 |
| rs6495309  | 15 CHRNA5_C | 0.46 Add | 1.05(0.92-1.2)  | 4.78E-01 | 1.00E+00 |
| rs684513   | 15 CHRNA5_C | 0.25 Dom | 1.08(0.89-1.31) | 4.37E-01 | 1.00E+00 |
| rs555018   | 15 CHRNA5_C | 0.18 Add | 1.06(0.89-1.26) | 5.12E-01 | 1.00E+00 |
| rs518425   | 15 CHRNA5_C | 0.22 Rec | 1.02(0.67-1.55) | 9.25E-01 | 1.00E+00 |
| rs578776   | 15 CHRNA5_C | 0.22 Rec | 1.02(0.67-1.55) | 9.25E-01 | 1.00E+00 |
| rs2036527  | 15 CHRNA5_C | 0.03 Add | 0.9(0.62-1.31)  | 5.75E-01 | 1.00E+00 |
| rs12914385 | 15 CHRNA5_C | 0.28 Rec | 0.96(0.65-1.42) | 8.50E-01 | 1.00E+00 |
| rs12910984 | 15 CHRNA5_C | 0.46 Rec | 1.11(0.88-1.4)  | 3.71E-01 | 1.00E+00 |
| rs17486278 | 15 CHRNA5_C | 0.28 Dom | 0.98(0.81-1.19) | 8.30E-01 | 1.00E+00 |
| rs6495307  | 15 CHRNA5_C | 0.19 Rec | 1.14(0.71-1.82) | 5.86E-01 | 1.00E+00 |
| rs2133965  | 15 CHRNA7   | 0.20 Add | 0.82(0.69-0.97) | 2.12E-02 | 5.40E-01 |
| rs8024987  | 15 CHRNA7   | 0.17 Rec | 2.07(1.12-3.82) | 2.00E-02 | 6.37E-01 |
| rs1514250  | 15 CHRNA7   | 0.20 Add | 0.83(0.7-0.98)  | 2.61E-02 | 6.56E-01 |
| rs982574   | 15 CHRNA7   | 0.20 Add | 0.83(0.7-0.98)  | 2.61E-02 | 6.57E-01 |
| rs12914788 | 15 CHRNA7   | 0.20 Add | 0.83(0.7-0.98)  | 2.61E-02 | 6.59E-01 |
| rs1604265  | 15 CHRNA7   | 0.20 Add | 0.83(0.7-0.98)  | 2.61E-02 | 6.59E-01 |

|            |           |          |                 |          |          |
|------------|-----------|----------|-----------------|----------|----------|
| rs4779956  | 15 CHRNA7 | 0.05 Add | 0.72(0.52-1)    | 5.34E-02 | 6.59E-01 |
| rs7179733  | 15 CHRNA7 | 0.18 Rec | 1.86(1.09-3.19) | 2.28E-02 | 6.61E-01 |
| rs1514248  | 15 CHRNA7 | 0.20 Add | 0.83(0.7-0.98)  | 2.68E-02 | 6.65E-01 |
| rs12899561 | 15 CHRNA7 | 0.08 Add | 0.78(0.61-1.01) | 5.50E-02 | 7.10E-01 |
| rs12904275 | 15 CHRNA7 | 0.08 Add | 0.78(0.61-1.01) | 5.50E-02 | 7.11E-01 |
| rs11071530 | 15 CHRNA7 | 0.19 Add | 0.83(0.7-0.99)  | 3.38E-02 | 7.38E-01 |
| rs4779975  | 15 CHRNA7 | 0.05 Add | 0.75(0.55-1.02) | 6.91E-02 | 7.54E-01 |
| rs7164518  | 15 CHRNA7 | 0.09 Add | 0.79(0.62-1.01) | 6.43E-02 | 7.57E-01 |
| rs12916592 | 15 CHRNA7 | 0.20 Add | 0.84(0.71-0.99) | 4.13E-02 | 7.88E-01 |
| rs11071532 | 15 CHRNA7 | 0.20 Add | 0.84(0.71-0.99) | 4.13E-02 | 7.89E-01 |
| rs8027035  | 15 CHRNA7 | 0.20 Add | 0.84(0.71-0.99) | 4.13E-02 | 7.89E-01 |
| rs965435   | 15 CHRNA7 | 0.19 Rec | 1.78(1.04-3.07) | 3.71E-02 | 7.94E-01 |
| rs2175886  | 15 CHRNA7 | 0.19 Rec | 1.73(1.02-2.94) | 4.17E-02 | 8.26E-01 |
| rs1355920  | 15 CHRNA7 | 0.19 Add | 0.85(0.71-1)    | 5.16E-02 | 8.50E-01 |
| rs8027814  | 15 CHRNA7 | 0.21 Rec | 1.61(0.99-2.63) | 5.62E-02 | 8.59E-01 |
| rs1514246  | 15 CHRNA7 | 0.19 Rec | 1.68(1-2.81)    | 4.82E-02 | 8.60E-01 |
| rs883473   | 15 CHRNA7 | 0.19 Rec | 1.72(1-2.94)    | 4.94E-02 | 8.61E-01 |
| rs2337980  | 15 CHRNA7 | 0.25 Rec | 0.66(0.43-1.02) | 6.45E-02 | 8.66E-01 |
| rs868437   | 15 CHRNA7 | 0.19 Rec | 1.7(0.99-2.9)   | 5.36E-02 | 8.70E-01 |
| rs12591836 | 15 CHRNA7 | 0.07 Add | 0.8(0.62-1.04)  | 1.00E-01 | 8.71E-01 |
| rs12593470 | 15 CHRNA7 | 0.07 Add | 0.8(0.62-1.04)  | 1.00E-01 | 8.71E-01 |
| rs7179008  | 15 CHRNA7 | 0.09 Add | 0.82(0.64-1.04) | 1.02E-01 | 8.72E-01 |
| rs7178176  | 15 CHRNA7 | 0.09 Add | 0.82(0.64-1.04) | 1.02E-01 | 8.72E-01 |
| rs12906868 | 15 CHRNA7 | 0.12 Dom | 0.81(0.64-1.03) | 8.35E-02 | 9.04E-01 |
| rs11071518 | 15 CHRNA7 | 0.07 Add | 0.82(0.63-1.08) | 1.52E-01 | 9.14E-01 |
| rs8029400  | 15 CHRNA7 | 0.42 Add | 0.93(0.81-1.06) | 2.82E-01 | 9.27E-01 |
| rs8028396  | 15 CHRNA7 | 0.42 Add | 0.93(0.81-1.06) | 2.82E-01 | 9.27E-01 |
| rs35057608 | 15 CHRNA7 | 0.04 Dom | 0.79(0.55-1.13) | 1.92E-01 | 9.31E-01 |
| rs12915265 | 15 CHRNA7 | 0.04 Dom | 0.79(0.55-1.13) | 1.92E-01 | 9.31E-01 |
| rs11852956 | 15 CHRNA7 | 0.04 Dom | 0.79(0.55-1.13) | 1.92E-01 | 9.31E-01 |
| rs1500946  | 15 CHRNA7 | 0.04 Dom | 0.79(0.55-1.13) | 1.92E-01 | 9.31E-01 |
| rs11858834 | 15 CHRNA7 | 0.04 Dom | 0.79(0.55-1.13) | 1.92E-01 | 9.31E-01 |
| rs8030315  | 15 CHRNA7 | 0.07 Add | 0.82(0.62-1.09) | 1.77E-01 | 9.35E-01 |
| rs11071515 | 15 CHRNA7 | 0.07 Add | 0.83(0.63-1.08) | 1.71E-01 | 9.37E-01 |

|            |           |          |                 |          |          |
|------------|-----------|----------|-----------------|----------|----------|
| rs7175581  | 15 CHRNA7 | 0.42 Dom | 0.88(0.72-1.08) | 2.24E-01 | 9.39E-01 |
| rs16956147 | 15 CHRNA7 | 0.07 Add | 0.83(0.64-1.08) | 1.77E-01 | 9.40E-01 |
| rs12900540 | 15 CHRNA7 | 0.07 Add | 0.84(0.64-1.09) | 1.78E-01 | 9.41E-01 |
| rs965434   | 15 CHRNA7 | 0.07 Add | 0.84(0.64-1.09) | 1.78E-01 | 9.41E-01 |
| rs16956132 | 15 CHRNA7 | 0.07 Add | 0.84(0.64-1.09) | 1.83E-01 | 9.46E-01 |
| rs1514247  | 15 CHRNA7 | 0.07 Add | 0.84(0.64-1.09) | 1.84E-01 | 9.47E-01 |
| rs9788679  | 15 CHRNA7 | 0.06 Add | 0.84(0.63-1.11) | 2.15E-01 | 9.51E-01 |
| rs6494223  | 15 CHRNA7 | 0.42 Add | 0.92(0.81-1.06) | 2.65E-01 | 9.54E-01 |
| rs10438287 | 15 CHRNA7 | 0.04 Dom | 0.8(0.56-1.14)  | 2.14E-01 | 9.54E-01 |
| rs4779565  | 15 CHRNA7 | 0.35 Dom | 0.9(0.74-1.09)  | 2.81E-01 | 9.55E-01 |
| rs12915695 | 15 CHRNA7 | 0.05 Dom | 0.81(0.58-1.14) | 2.36E-01 | 9.55E-01 |
| rs2651418  | 15 CHRNA7 | 0.42 Add | 1.08(0.94-1.23) | 2.75E-01 | 9.58E-01 |
| rs1500948  | 15 CHRNA7 | 0.06 Add | 0.84(0.63-1.12) | 2.26E-01 | 9.59E-01 |
| rs6494216  | 15 CHRNA7 | 0.07 Add | 0.85(0.64-1.12) | 2.40E-01 | 9.61E-01 |
| rs3826029  | 15 CHRNA7 | 0.39 Dom | 0.9(0.74-1.1)   | 2.96E-01 | 9.61E-01 |
| rs6494185  | 15 CHRNA7 | 0.12 Dom | 0.86(0.69-1.09) | 2.10E-01 | 9.65E-01 |
| rs6494212  | 15 CHRNA7 | 0.11 Dom | 0.84(0.66-1.06) | 1.36E-01 | 9.65E-01 |
| rs885071   | 15 CHRNA7 | 0.38 Dom | 0.9(0.74-1.1)   | 3.13E-01 | 9.68E-01 |
| rs8035668  | 15 CHRNA7 | 0.07 Add | 0.85(0.64-1.12) | 2.56E-01 | 9.69E-01 |
| rs8036104  | 15 CHRNA7 | 0.07 Add | 0.85(0.64-1.12) | 2.56E-01 | 9.69E-01 |
| rs9788657  | 15 CHRNA7 | 0.07 Add | 0.85(0.64-1.12) | 2.56E-01 | 9.69E-01 |
| rs1392808  | 15 CHRNA7 | 0.01 Add | 1.08(0.62-1.88) | 7.74E-01 | 9.70E-01 |
| rs16956223 | 15 CHRNA7 | 0.01 Add | 1.08(0.62-1.88) | 7.74E-01 | 9.70E-01 |
| rs13329490 | 15 CHRNA7 | 0.01 Add | 1.08(0.62-1.88) | 7.74E-01 | 9.70E-01 |
| rs2221223  | 15 CHRNA7 | 0.01 Add | 1.08(0.62-1.88) | 7.74E-01 | 9.70E-01 |
| rs12440000 | 15 CHRNA7 | 0.01 Add | 1.08(0.62-1.88) | 7.74E-01 | 9.70E-01 |
| rs2651417  | 15 CHRNA7 | 0.40 Dom | 1.14(0.93-1.39) | 2.09E-01 | 9.71E-01 |
| rs6494211  | 15 CHRNA7 | 0.39 Dom | 0.87(0.71-1.05) | 1.51E-01 | 9.72E-01 |
| rs12440480 | 15 CHRNA7 | 0.30 Dom | 1(0.82-1.21)    | 9.77E-01 | 9.77E-01 |
| rs6494165  | 15 CHRNA7 | 0.12 Dom | 0.86(0.68-1.08) | 2.04E-01 | 9.77E-01 |
| rs6494182  | 15 CHRNA7 | 0.12 Dom | 0.86(0.68-1.08) | 2.04E-01 | 9.77E-01 |
| rs1913459  | 15 CHRNA7 | 0.12 Dom | 0.86(0.68-1.08) | 2.04E-01 | 9.77E-01 |
| rs8035663  | 15 CHRNA7 | 0.12 Dom | 0.86(0.68-1.08) | 2.04E-01 | 9.77E-01 |
| rs11071512 | 15 CHRNA7 | 0.12 Dom | 0.86(0.68-1.08) | 2.04E-01 | 9.77E-01 |

|            |           |          |                 |          |          |
|------------|-----------|----------|-----------------|----------|----------|
| rs11071511 | 15 CHRNA7 | 0.12 Dom | 0.86(0.68-1.08) | 2.04E-01 | 9.77E-01 |
| rs11635209 | 15 CHRNA7 | 0.12 Dom | 0.86(0.68-1.08) | 2.04E-01 | 9.77E-01 |
| rs8033518  | 15 CHRNA7 | 0.12 Dom | 0.85(0.67-1.07) | 1.64E-01 | 9.78E-01 |
| rs7170028  | 15 CHRNA7 | 0.30 Add | 1.09(0.94-1.26) | 2.51E-01 | 9.78E-01 |
| rs7175359  | 15 CHRNA7 | 0.30 Add | 1.09(0.94-1.26) | 2.51E-01 | 9.78E-01 |
| rs10438342 | 15 CHRNA7 | 0.06 Dom | 0.86(0.64-1.17) | 3.41E-01 | 9.78E-01 |
| rs904951   | 15 CHRNA7 | 0.30 Rec | 1.25(0.91-1.72) | 1.72E-01 | 9.78E-01 |
| rs8025554  | 15 CHRNA7 | 0.30 Rec | 1.25(0.91-1.72) | 1.72E-01 | 9.78E-01 |
| rs8027034  | 15 CHRNA7 | 0.12 Dom | 0.85(0.68-1.08) | 1.81E-01 | 9.78E-01 |
| rs11635941 | 15 CHRNA7 | 0.39 Dom | 0.92(0.75-1.11) | 3.78E-01 | 9.79E-01 |
| rs4779969  | 15 CHRNA7 | 0.12 Dom | 0.85(0.67-1.07) | 1.66E-01 | 9.79E-01 |
| rs4779970  | 15 CHRNA7 | 0.12 Dom | 0.85(0.67-1.07) | 1.66E-01 | 9.79E-01 |
| rs1606659  | 15 CHRNA7 | 0.39 Dom | 0.92(0.75-1.11) | 3.78E-01 | 9.79E-01 |
| rs4779968  | 15 CHRNA7 | 0.27 Rec | 1.19(0.82-1.74) | 3.65E-01 | 9.79E-01 |
| rs7402321  | 15 CHRNA7 | 0.35 Dom | 0.88(0.73-1.07) | 1.97E-01 | 9.80E-01 |
| rs12438848 | 15 CHRNA7 | 0.35 Dom | 0.91(0.75-1.11) | 3.49E-01 | 9.80E-01 |
| rs8037084  | 15 CHRNA7 | 0.07 Add | 0.86(0.65-1.14) | 2.89E-01 | 9.80E-01 |
| rs11071503 | 15 CHRNA7 | 0.26 Rec | 1.15(0.78-1.69) | 4.81E-01 | 9.81E-01 |
| rs4779563  | 15 CHRNA7 | 0.26 Rec | 1.15(0.78-1.69) | 4.81E-01 | 9.81E-01 |
| rs8037484  | 15 CHRNA7 | 0.26 Rec | 1.15(0.78-1.69) | 4.81E-01 | 9.81E-01 |
| rs4779971  | 15 CHRNA7 | 0.26 Rec | 1.15(0.78-1.69) | 4.81E-01 | 9.81E-01 |
| rs1913456  | 15 CHRNA7 | 0.39 Dom | 0.92(0.75-1.12) | 3.91E-01 | 9.82E-01 |
| rs9672321  | 15 CHRNA7 | 0.39 Dom | 0.92(0.75-1.12) | 3.91E-01 | 9.82E-01 |
| rs12904458 | 15 CHRNA7 | 0.30 Rec | 1.24(0.9-1.71)  | 1.88E-01 | 9.83E-01 |
| rs904952   | 15 CHRNA7 | 0.30 Rec | 1.24(0.9-1.71)  | 1.88E-01 | 9.83E-01 |
| rs11637923 | 15 CHRNA7 | 0.39 Dom | 0.93(0.76-1.14) | 4.83E-01 | 9.94E-01 |
| rs2072660  | 1 CHRNB2  | 0.26 Add | 0.79(0.67-0.92) | 3.38E-03 | 7.31E-02 |
| rs3811450  | 1 CHRNB2  | 0.17 Dom | 0.74(0.6-0.92)  | 5.97E-03 | 1.18E-01 |
| rs2072661  | 1 CHRNB2  | 0.27 Add | 0.82(0.7-0.96)  | 1.19E-02 | 2.08E-01 |
| rs9427092  | 1 CHRNB2  | 0.21 Add | 1.23(1.05-1.45) | 1.29E-02 | 2.29E-01 |
| rs2131902  | 1 CHRNB2  | 0.29 Add | 0.83(0.71-0.97) | 1.66E-02 | 2.48E-01 |
| rs1127326  | 1 CHRNB2  | 0.28 Add | 0.83(0.71-0.97) | 2.06E-02 | 2.90E-01 |
| rs11264222 | 1 CHRNB2  | 0.28 Add | 0.83(0.71-0.97) | 2.06E-02 | 2.90E-01 |
| rs1127317  | 1 CHRNB2  | 0.28 Add | 0.83(0.72-0.97) | 2.17E-02 | 3.02E-01 |

|            |   |          |      |     |                 |          |          |
|------------|---|----------|------|-----|-----------------|----------|----------|
| rs1127314  | 1 | CHRNA2   | 0.28 | Add | 0.83(0.72-0.97) | 2.17E-02 | 3.02E-01 |
| rs3766927  | 1 | CHRNA2   | 0.28 | Add | 0.84(0.72-0.97) | 2.25E-02 | 3.04E-01 |
| rs9427094  | 1 | CHRNA2   | 0.46 | Add | 0.86(0.76-0.99) | 2.99E-02 | 3.08E-01 |
| rs1127311  | 1 | CHRNA2   | 0.45 | Add | 0.87(0.76-0.99) | 3.63E-02 | 3.30E-01 |
| rs6656743  | 1 | CHRNA2   | 0.28 | Add | 0.84(0.72-0.98) | 2.54E-02 | 3.33E-01 |
| rs1127313  | 1 | CHRNA2   | 0.45 | Add | 0.87(0.76-0.99) | 3.70E-02 | 3.34E-01 |
| rs2072659  | 1 | CHRNA2   | 0.19 | Dom | 0.81(0.67-0.99) | 4.46E-02 | 4.31E-01 |
| rs2072658  | 1 | CHRNA2   | 0.18 | Rec | 1.37(0.86-2.17) | 1.85E-01 | 8.70E-01 |
| rs4074436  | 1 | CHRNA2   | 0.11 | Dom | 1.04(0.83-1.31) | 7.32E-01 | 9.29E-01 |
| rs7543174  | 1 | CHRNA2   | 0.14 | Dom | 1.08(0.87-1.34) | 4.92E-01 | 9.36E-01 |
| rs6660775  | 1 | CHRNA2   | 0.14 | Rec | 0.86(0.42-1.78) | 6.89E-01 | 9.90E-01 |
| rs4845652  | 1 | CHRNA2   | 0.14 | Rec | 0.86(0.42-1.78) | 6.89E-01 | 9.90E-01 |
| rs7539745  | 1 | CHRNA2   | 0.12 | Rec | 1.13(0.49-2.58) | 7.74E-01 | 9.97E-01 |
| rs7553602  | 1 | CHRNA2   | 0.12 | Dom | 1.06(0.85-1.33) | 5.93E-01 | 9.97E-01 |
| rs9616     | 1 | CHRNA2   | 0.34 | Rec | 1.07(0.8-1.44)  | 6.49E-01 | 9.98E-01 |
| rs10107450 | 8 | CHRNA3_C | 0.20 | Dom | 1.24(1.02-1.51) | 3.19E-02 | 1.79E-01 |
| rs10109429 | 8 | CHRNA3_C | 0.23 | Dom | 1.21(1-1.47)    | 5.27E-02 | 2.25E-01 |
| rs2196128  | 8 | CHRNA3_C | 0.23 | Dom | 1.21(1-1.47)    | 5.27E-02 | 2.25E-01 |
| rs10087172 | 8 | CHRNA3_C | 0.23 | Dom | 1.21(1-1.47)    | 5.27E-02 | 2.25E-01 |
| rs1072003  | 8 | CHRNA3_C | 0.23 | Dom | 1.21(1-1.47)    | 5.42E-02 | 2.29E-01 |
| rs2217732  | 8 | CHRNA3_C | 0.23 | Dom | 1.21(1-1.47)    | 5.42E-02 | 2.30E-01 |
| rs10109040 | 8 | CHRNA3_C | 0.21 | Dom | 1.22(1-1.48)    | 4.98E-02 | 2.30E-01 |
| rs6474419  | 8 | CHRNA3_C | 0.21 | Dom | 1.22(1-1.49)    | 4.72E-02 | 2.36E-01 |
| rs7824155  | 8 | CHRNA3_C | 0.23 | Dom | 1.21(0.99-1.47) | 5.67E-02 | 2.37E-01 |
| rs892413   | 8 | CHRNA3_C | 0.23 | Dom | 1.21(0.99-1.47) | 5.67E-02 | 2.37E-01 |
| rs7812298  | 8 | CHRNA3_C | 0.23 | Dom | 1.21(0.99-1.47) | 5.67E-02 | 2.37E-01 |
| rs7845663  | 8 | CHRNA3_C | 0.23 | Dom | 1.21(0.99-1.47) | 5.67E-02 | 2.37E-01 |
| rs9298629  | 8 | CHRNA3_C | 0.23 | Dom | 1.21(0.99-1.46) | 5.79E-02 | 2.40E-01 |
| rs9298628  | 8 | CHRNA3_C | 0.23 | Dom | 1.21(0.99-1.46) | 5.79E-02 | 2.40E-01 |
| rs2304297  | 8 | CHRNA3_C | 0.23 | Dom | 1.21(0.99-1.46) | 5.96E-02 | 2.44E-01 |
| rs6982753  | 8 | CHRNA3_C | 0.23 | Dom | 1.2(0.99-1.46)  | 6.08E-02 | 2.46E-01 |
| rs16891561 | 8 | CHRNA3_C | 0.23 | Dom | 1.2(0.99-1.45)  | 6.92E-02 | 2.57E-01 |
| rs7017612  | 8 | CHRNA3_C | 0.23 | Dom | 1.2(0.99-1.45)  | 6.92E-02 | 2.57E-01 |
| rs4236926  | 8 | CHRNA3_C | 0.23 | Dom | 1.2(0.99-1.45)  | 6.92E-02 | 2.57E-01 |

|            |            |          |                 |          |          |
|------------|------------|----------|-----------------|----------|----------|
| rs6474414  | 8 CHRNA3_C | 0.23 Dom | 1.2(0.99-1.45)  | 6.92E-02 | 2.58E-01 |
| rs6997909  | 8 CHRNA3_C | 0.23 Dom | 1.2(0.99-1.45)  | 6.92E-02 | 2.58E-01 |
| rs6474415  | 8 CHRNA3_C | 0.23 Dom | 1.2(0.99-1.45)  | 6.92E-02 | 2.58E-01 |
| rs4950     | 8 CHRNA3_C | 0.23 Dom | 1.2(0.99-1.45)  | 6.92E-02 | 2.58E-01 |
| rs7004381  | 8 CHRNA3_C | 0.23 Dom | 1.2(0.99-1.45)  | 6.92E-02 | 2.58E-01 |
| rs6474412  | 8 CHRNA3_C | 0.23 Dom | 1.2(0.99-1.45)  | 6.92E-02 | 2.58E-01 |
| rs1530848  | 8 CHRNA3_C | 0.23 Dom | 1.2(0.99-1.45)  | 6.92E-02 | 2.58E-01 |
| rs13280604 | 8 CHRNA3_C | 0.23 Dom | 1.2(0.99-1.45)  | 6.92E-02 | 2.58E-01 |
| rs1451240  | 8 CHRNA3_C | 0.23 Dom | 1.2(0.99-1.45)  | 6.92E-02 | 2.58E-01 |
| rs1530847  | 8 CHRNA3_C | 0.23 Dom | 1.2(0.99-1.45)  | 6.92E-02 | 2.58E-01 |
| rs13273442 | 8 CHRNA3_C | 0.23 Dom | 1.2(0.99-1.45)  | 6.92E-02 | 2.58E-01 |
| rs1451239  | 8 CHRNA3_C | 0.23 Dom | 1.2(0.99-1.45)  | 6.92E-02 | 2.58E-01 |
| rs1955185  | 8 CHRNA3_C | 0.23 Dom | 1.2(0.99-1.45)  | 6.92E-02 | 2.58E-01 |
| rs16891569 | 8 CHRNA3_C | 0.02 Dom | 0.98(0.57-1.67) | 9.36E-01 | 9.68E-01 |
| rs2834593  | 21 CLIC6   | 0.19 Add | 1.24(1.05-1.46) | 1.14E-02 | 1.57E-01 |
| rs2070367  | 21 CLIC6   | 0.21 Add | 1.23(1.05-1.44) | 1.24E-02 | 1.67E-01 |
| rs6517254  | 21 CLIC6   | 0.20 Dom | 1.29(1.05-1.57) | 1.28E-02 | 1.95E-01 |
| rs11702251 | 21 CLIC6   | 0.20 Dom | 1.28(1.05-1.56) | 1.51E-02 | 2.22E-01 |
| rs2834579  | 21 CLIC6   | 0.17 Dom | 1.24(1.01-1.52) | 3.87E-02 | 4.09E-01 |
| rs2834577  | 21 CLIC6   | 0.17 Dom | 1.24(1.01-1.52) | 3.95E-02 | 4.16E-01 |
| rs7281040  | 21 CLIC6   | 0.17 Dom | 1.24(1.01-1.52) | 4.22E-02 | 4.34E-01 |
| rs2834586  | 21 CLIC6   | 0.17 Add | 1.19(1-1.43)    | 4.95E-02 | 4.62E-01 |
| rs2834576  | 21 CLIC6   | 0.17 Add | 1.2(1-1.43)     | 4.43E-02 | 4.76E-01 |
| rs2236610  | 21 CLIC6   | 0.17 Add | 1.2(1-1.43)     | 4.53E-02 | 4.84E-01 |
| rs2834587  | 21 CLIC6   | 0.17 Add | 1.18(0.99-1.41) | 6.24E-02 | 4.89E-01 |
| rs7275340  | 21 CLIC6   | 0.17 Add | 1.19(1-1.42)    | 5.41E-02 | 4.89E-01 |
| rs717578   | 21 CLIC6   | 0.17 Add | 1.19(1-1.42)    | 5.41E-02 | 4.89E-01 |
| rs1075704  | 21 CLIC6   | 0.17 Add | 1.19(1-1.42)    | 5.41E-02 | 4.89E-01 |
| rs2834585  | 21 CLIC6   | 0.17 Add | 1.19(1-1.42)    | 5.41E-02 | 4.89E-01 |
| rs733014   | 21 CLIC6   | 0.17 Add | 1.19(1-1.42)    | 5.41E-02 | 4.89E-01 |
| rs2409531  | 21 CLIC6   | 0.17 Add | 1.2(1-1.43)     | 4.71E-02 | 4.95E-01 |
| rs2834575  | 21 CLIC6   | 0.17 Add | 1.2(1-1.43)     | 4.71E-02 | 4.95E-01 |
| rs11088294 | 21 CLIC6   | 0.29 Dom | 0.83(0.68-1)    | 5.12E-02 | 5.12E-01 |
| rs2834574  | 21 CLIC6   | 0.17 Add | 1.18(0.99-1.4)  | 6.91E-02 | 5.24E-01 |



|            |          |          |                 |          |          |
|------------|----------|----------|-----------------|----------|----------|
| rs2834578  | 21 CLIC6 | 0.36 Dom | 1.14(0.93-1.38) | 2.00E-01 | 5.26E-01 |
| rs1557271  | 21 CLIC6 | 0.17 Add | 1.17(0.98-1.4)  | 8.03E-02 | 5.29E-01 |
| rs2834591  | 21 CLIC6 | 0.17 Add | 1.17(0.98-1.4)  | 8.03E-02 | 5.30E-01 |
| rs2186288  | 21 CLIC6 | 0.17 Add | 1.17(0.98-1.4)  | 8.03E-02 | 5.30E-01 |
| rs7281533  | 21 CLIC6 | 0.17 Add | 1.18(0.99-1.41) | 6.25E-02 | 5.30E-01 |
| rs2154443  | 21 CLIC6 | 0.17 Dom | 1.21(0.99-1.48) | 6.67E-02 | 5.35E-01 |
| rs2070368  | 21 CLIC6 | 0.39 Add | 1.1(0.96-1.27)  | 1.58E-01 | 5.38E-01 |
| rs3819041  | 21 CLIC6 | 0.39 Add | 1.1(0.96-1.27)  | 1.58E-01 | 5.38E-01 |
| rs2834573  | 21 CLIC6 | 0.17 Add | 1.18(0.99-1.41) | 6.46E-02 | 5.40E-01 |
| rs2834572  | 21 CLIC6 | 0.17 Add | 1.18(0.99-1.41) | 6.46E-02 | 5.40E-01 |
| rs2834603  | 21 CLIC6 | 0.11 Add | 1.21(0.98-1.49) | 7.79E-02 | 5.58E-01 |
| rs2834601  | 21 CLIC6 | 0.11 Add | 1.21(0.98-1.49) | 7.79E-02 | 5.58E-01 |
| rs2834599  | 21 CLIC6 | 0.38 Add | 1.08(0.94-1.25) | 2.65E-01 | 5.96E-01 |
| rs2186287  | 21 CLIC6 | 0.17 Add | 1.16(0.97-1.38) | 1.03E-01 | 6.00E-01 |
| rs1107470  | 21 CLIC6 | 0.14 Dom | 1.14(0.92-1.42) | 2.30E-01 | 6.49E-01 |
| rs2154444  | 21 CLIC6 | 0.19 Rec | 0.68(0.39-1.17) | 1.63E-01 | 6.55E-01 |
| rs2834604  | 21 CLIC6 | 0.26 Dom | 0.97(0.8-1.18)  | 7.91E-01 | 7.91E-01 |
| rs9444584  | 6 CNR1   | 0.14 Rec | 2.37(1.16-4.84) | 1.73E-02 | 4.61E-01 |
| rs806377   | 6 CNR1   | 0.30 Rec | 1.44(1.05-1.98) | 2.31E-02 | 5.23E-01 |
| rs9353525  | 6 CNR1   | 0.45 Dom | 0.8(0.65-0.99)  | 3.64E-02 | 6.48E-01 |
| rs9353524  | 6 CNR1   | 0.45 Dom | 0.81(0.66-0.99) | 3.86E-02 | 6.65E-01 |
| rs806375   | 6 CNR1   | 0.25 Rec | 1.42(0.99-2.05) | 5.88E-02 | 8.01E-01 |
| rs806374   | 6 CNR1   | 0.47 Add | 0.89(0.77-1.02) | 8.25E-02 | 8.71E-01 |
| rs806369   | 6 CNR1   | 0.41 Rec | 0.8(0.61-1.04)  | 9.12E-02 | 8.76E-01 |
| rs806371   | 6 CNR1   | 0.48 Add | 0.9(0.79-1.03)  | 1.30E-01 | 8.77E-01 |
| rs806381   | 6 CNR1   | 0.29 Rec | 1.36(0.96-1.92) | 8.25E-02 | 8.80E-01 |
| rs806366   | 6 CNR1   | 0.41 Rec | 0.8(0.62-1.04)  | 9.85E-02 | 8.86E-01 |
| rs806376   | 6 CNR1   | 0.24 Dom | 0.87(0.71-1.05) | 1.46E-01 | 8.91E-01 |
| rs12205430 | 6 CNR1   | 0.15 Dom | 0.96(0.77-1.19) | 6.91E-01 | 9.04E-01 |
| rs806370   | 6 CNR1   | 0.48 Add | 0.9(0.78-1.03)  | 1.11E-01 | 9.07E-01 |
| rs806372   | 6 CNR1   | 0.48 Add | 0.9(0.78-1.03)  | 1.11E-01 | 9.07E-01 |
| rs806365   | 6 CNR1   | 0.38 Add | 0.9(0.78-1.03)  | 1.31E-01 | 9.37E-01 |
| rs806368   | 6 CNR1   | 0.48 Add | 0.9(0.79-1.04)  | 1.47E-01 | 9.50E-01 |
| rs2023239  | 6 CNR1   | 0.03 Add | 0.96(0.62-1.5)  | 8.72E-01 | 9.84E-01 |

|            |         |          |                 |          |          |
|------------|---------|----------|-----------------|----------|----------|
| rs2057276  | 6 CNR1  | 0.05 Add | 1.14(0.85-1.53) | 3.86E-01 | 9.86E-01 |
| rs6454673  | 6 CNR1  | 0.21 Rec | 1.31(0.84-2.02) | 2.32E-01 | 9.90E-01 |
| rs7752758  | 6 CNR1  | 0.02 Add | 1.2(0.7-2.03)   | 5.08E-01 | 9.92E-01 |
| rs6454672  | 6 CNR1  | 0.02 Add | 1.2(0.7-2.03)   | 5.08E-01 | 9.92E-01 |
| rs806380   | 6 CNR1  | 0.16 Dom | 0.91(0.73-1.12) | 3.78E-01 | 9.95E-01 |
| rs4707436  | 6 CNR1  | 0.07 Add | 0.95(0.73-1.25) | 7.29E-01 | 9.96E-01 |
| rs10485171 | 6 CNR1  | 0.07 Add | 0.96(0.74-1.25) | 7.72E-01 | 9.97E-01 |
| rs6938321  | 6 CNR1  | 0.09 Add | 0.93(0.73-1.17) | 5.31E-01 | 9.97E-01 |
| rs7766029  | 6 CNR1  | 0.08 Dom | 0.97(0.73-1.27) | 8.01E-01 | 9.97E-01 |
| rs9450898  | 6 CNR1  | 0.03 Add | 0.96(0.62-1.49) | 8.52E-01 | 9.97E-01 |
| rs6928813  | 6 CNR1  | 0.03 Add | 0.96(0.62-1.49) | 8.52E-01 | 9.97E-01 |
| rs6928499  | 6 CNR1  | 0.03 Add | 0.96(0.62-1.49) | 8.52E-01 | 9.97E-01 |
| rs806379   | 6 CNR1  | 0.18 Dom | 0.93(0.76-1.15) | 5.10E-01 | 9.98E-01 |
| rs806378   | 6 CNR1  | 0.15 Add | 0.96(0.79-1.16) | 6.83E-01 | 9.98E-01 |
| rs12528858 | 6 CNR1  | 0.06 Add | 1.06(0.81-1.41) | 6.58E-01 | 9.98E-01 |
| rs1049353  | 6 CNR1  | 0.06 Dom | 0.96(0.72-1.29) | 7.95E-01 | 9.99E-01 |
| rs5993891  | 22 COMT | 0.03 Add | 0.71(0.47-1.07) | 1.05E-01 | 8.70E-01 |
| rs4680     | 22 COMT | 0.26 Rec | 0.66(0.43-1.01) | 5.80E-02 | 8.71E-01 |
| rs8137828  | 22 COMT | 0.31 Add | 0.87(0.75-1)    | 5.54E-02 | 8.76E-01 |
| rs6518592  | 22 COMT | 0.29 Add | 0.87(0.75-1.01) | 5.89E-02 | 8.77E-01 |
| rs174697   | 22 COMT | 0.39 Rec | 0.98(0.75-1.28) | 8.78E-01 | 8.78E-01 |
| rs758373   | 22 COMT | 0.03 Dom | 0.71(0.46-1.1)  | 1.23E-01 | 8.85E-01 |
| rs2239394  | 22 COMT | 0.03 Dom | 0.71(0.46-1.1)  | 1.23E-01 | 8.85E-01 |
| rs2240713  | 22 COMT | 0.03 Dom | 0.71(0.46-1.1)  | 1.23E-01 | 8.85E-01 |
| rs2239395  | 22 COMT | 0.03 Dom | 0.71(0.46-1.1)  | 1.23E-01 | 8.85E-01 |
| rs1544325  | 22 COMT | 0.29 Add | 0.87(0.75-1.01) | 6.21E-02 | 8.89E-01 |
| rs165728   | 22 COMT | 0.41 Rec | 1.07(0.83-1.38) | 5.89E-01 | 9.49E-01 |
| rs174699   | 22 COMT | 0.41 Rec | 1.07(0.83-1.38) | 5.89E-01 | 9.49E-01 |
| rs5748489  | 22 COMT | 0.30 Dom | 0.85(0.7-1.03)  | 9.19E-02 | 9.51E-01 |
| rs5748485  | 22 COMT | 0.30 Dom | 0.85(0.7-1.03)  | 9.19E-02 | 9.52E-01 |
| rs9606186  | 22 COMT | 0.30 Dom | 0.85(0.7-1.03)  | 9.34E-02 | 9.54E-01 |
| rs5748483  | 22 COMT | 0.30 Dom | 0.85(0.7-1.03)  | 9.44E-02 | 9.55E-01 |
| rs5746847  | 22 COMT | 0.30 Dom | 0.85(0.7-1.03)  | 9.44E-02 | 9.55E-01 |
| rs4646316  | 22 COMT | 0.33 Dom | 1.18(0.97-1.43) | 9.27E-02 | 9.59E-01 |

|            |         |          |                 |          |          |
|------------|---------|----------|-----------------|----------|----------|
| rs5746848  | 22 COMT | 0.31 Add | 0.88(0.76-1.02) | 9.89E-02 | 9.65E-01 |
| rs165774   | 22 COMT | 0.13 Add | 0.84(0.68-1.04) | 1.02E-01 | 9.66E-01 |
| rs5746846  | 22 COMT | 0.31 Add | 0.89(0.77-1.02) | 1.00E-01 | 9.67E-01 |
| rs4485648  | 22 COMT | 0.08 Dom | 1.18(0.91-1.54) | 2.03E-01 | 9.77E-01 |
| rs12627876 | 22 COMT | 0.06 Dom | 1.19(0.89-1.58) | 2.32E-01 | 9.79E-01 |
| rs5992500  | 22 COMT | 0.08 Add | 1.16(0.91-1.48) | 2.29E-01 | 9.79E-01 |
| rs7290221  | 22 COMT | 0.42 Dom | 1.17(0.95-1.43) | 1.34E-01 | 9.82E-01 |
| rs1110479  | 22 COMT | 0.41 Add | 1.03(0.9-1.18)  | 6.66E-01 | 9.82E-01 |
| rs6267     | 22 COMT | 0.03 Add | 1.1(0.73-1.65)  | 6.46E-01 | 9.85E-01 |
| rs1110478  | 22 COMT | 0.49 Dom | 0.91(0.73-1.13) | 4.02E-01 | 9.85E-01 |
| rs165599   | 22 COMT | 0.49 Dom | 0.93(0.75-1.15) | 4.89E-01 | 9.85E-01 |
| rs2518824  | 22 COMT | 0.49 Dom | 0.91(0.73-1.13) | 4.04E-01 | 9.85E-01 |
| rs887200   | 22 COMT | 0.49 Dom | 0.91(0.73-1.13) | 4.04E-01 | 9.85E-01 |
| rs887199   | 22 COMT | 0.49 Dom | 0.93(0.74-1.15) | 4.85E-01 | 9.86E-01 |
| rs1110477  | 22 COMT | 0.41 Rec | 1.08(0.85-1.39) | 5.23E-01 | 9.89E-01 |
| rs165815   | 22 COMT | 0.49 Dom | 0.94(0.75-1.16) | 5.51E-01 | 9.93E-01 |
| rs174673   | 22 COMT | 0.32 Rec | 1.23(0.91-1.66) | 1.69E-01 | 9.93E-01 |
| rs4633     | 22 COMT | 0.25 Rec | 0.74(0.48-1.14) | 1.70E-01 | 9.93E-01 |
| rs11705619 | 22 COMT | 0.02 Dom | 0.88(0.53-1.46) | 6.12E-01 | 9.94E-01 |
| rs737866   | 22 COMT | 0.29 Dom | 1.09(0.9-1.32)  | 3.61E-01 | 9.95E-01 |
| rs933271   | 22 COMT | 0.42 Add | 1.08(0.94-1.23) | 2.86E-01 | 9.95E-01 |
| rs5748484  | 22 COMT | 0.29 Dom | 1.11(0.92-1.34) | 2.89E-01 | 9.96E-01 |
| rs9605031  | 22 COMT | 0.29 Dom | 1.11(0.92-1.34) | 2.89E-01 | 9.96E-01 |
| rs8140265  | 22 COMT | 0.29 Dom | 1.11(0.92-1.34) | 2.89E-01 | 9.96E-01 |
| rs4646312  | 22 COMT | 0.35 Dom | 1.12(0.93-1.36) | 2.40E-01 | 9.96E-01 |
| rs5993883  | 22 COMT | 0.39 Dom | 1.12(0.92-1.37) | 2.46E-01 | 9.96E-01 |
| rs2871047  | 22 COMT | 0.31 Rec | 1.23(0.9-1.66)  | 1.88E-01 | 9.96E-01 |
| rs10483103 | 22 COMT | 0.31 Rec | 1.23(0.9-1.66)  | 1.88E-01 | 9.96E-01 |
| rs174674   | 22 COMT | 0.41 Rec | 1.17(0.91-1.51) | 2.10E-01 | 9.96E-01 |
| rs165824   | 22 COMT | 0.49 Dom | 1.1(0.88-1.37)  | 4.15E-01 | 9.96E-01 |
| rs740603   | 22 COMT | 0.42 Dom | 1.14(0.93-1.4)  | 2.02E-01 | 9.97E-01 |
| rs5993882  | 22 COMT | 0.09 Dom | 1.1(0.86-1.41)  | 4.35E-01 | 9.97E-01 |
| rs2518823  | 22 COMT | 0.49 Add | 1.08(0.94-1.24) | 2.60E-01 | 9.97E-01 |
| rs9606189  | 22 COMT | 0.30 Dom | 1.12(0.92-1.35) | 2.55E-01 | 9.97E-01 |

|            |           |          |                 |          |          |
|------------|-----------|----------|-----------------|----------|----------|
| rs9605030  | 22 COMT   | 0.30 Dom | 1.12(0.92-1.35) | 2.56E-01 | 9.97E-01 |
| rs4646310  | 22 COMT   | 0.02 Dom | 0.85(0.51-1.41) | 5.29E-01 | 9.97E-01 |
| rs174675   | 22 COMT   | 0.42 Add | 1.07(0.94-1.23) | 3.04E-01 | 9.97E-01 |
| rs9332315  | 22 COMT   | 0.03 Dom | 1.16(0.8-1.7)   | 4.36E-01 | 9.97E-01 |
| rs2020917  | 22 COMT   | 0.29 Dom | 1.1(0.91-1.33)  | 3.41E-01 | 9.97E-01 |
| rs8185002  | 22 COMT   | 0.29 Dom | 1.1(0.91-1.33)  | 3.38E-01 | 9.97E-01 |
| rs165656   | 22 COMT   | 0.25 Add | 0.92(0.79-1.08) | 3.09E-01 | 9.97E-01 |
| rs2239393  | 22 COMT   | 0.35 Dom | 1.12(0.92-1.35) | 2.66E-01 | 9.97E-01 |
| rs737865   | 22 COMT   | 0.29 Dom | 1.09(0.9-1.32)  | 3.58E-01 | 9.98E-01 |
| rs174696   | 22 COMT   | 0.47 Rec | 1.11(0.89-1.4)  | 3.59E-01 | 9.98E-01 |
| rs6518591  | 22 COMT   | 0.08 Dom | 1.1(0.84-1.43)  | 4.84E-01 | 9.98E-01 |
| rs7569963  | 2 CREB1   | 0.14 Dom | 1.12(0.9-1.39)  | 3.17E-01 | 5.40E-01 |
| rs2253206  | 2 CREB1   | 0.39 Rec | 0.86(0.66-1.13) | 2.87E-01 | 7.24E-01 |
| rs16839883 | 2 CREB1   | 0.24 Dom | 0.93(0.76-1.12) | 4.34E-01 | 7.95E-01 |
| rs2551640  | 2 CREB1   | 0.38 Rec | 0.85(0.65-1.12) | 2.41E-01 | 8.00E-01 |
| rs6740584  | 2 CREB1   | 0.39 Rec | 0.85(0.65-1.12) | 2.47E-01 | 8.02E-01 |
| rs11904814 | 2 CREB1   | 0.39 Rec | 0.85(0.65-1.12) | 2.47E-01 | 8.02E-01 |
| rs2254137  | 2 CREB1   | 0.39 Rec | 0.85(0.65-1.12) | 2.47E-01 | 8.02E-01 |
| rs2551645  | 2 CREB1   | 0.39 Rec | 0.85(0.65-1.12) | 2.47E-01 | 8.02E-01 |
| rs7369949  | 2 CREB1   | 0.39 Rec | 0.85(0.65-1.11) | 2.41E-01 | 8.03E-01 |
| rs10932201 | 2 CREB1   | 0.39 Rec | 0.85(0.65-1.11) | 2.39E-01 | 8.04E-01 |
| rs3770704  | 2 CREB1   | 0.24 Dom | 0.92(0.76-1.12) | 4.18E-01 | 8.05E-01 |
| rs2072381  | 16 CREBBP | 0.09 Add | 1.32(1.05-1.66) | 1.54E-02 | 3.08E-01 |
| rs130021   | 16 CREBBP | 0.41 Dom | 1.2(0.98-1.47)  | 8.19E-02 | 9.33E-01 |
| rs3789033  | 16 CREBBP | 0.11 Dom | 1.21(0.96-1.53) | 1.05E-01 | 9.70E-01 |
| rs2283480  | 16 CREBBP | 0.11 Dom | 1.21(0.96-1.54) | 1.06E-01 | 9.71E-01 |
| rs12599202 | 16 CREBBP | 0.04 Add | 1.25(0.88-1.77) | 2.22E-01 | 9.74E-01 |
| rs130006   | 16 CREBBP | 0.01 Add | 1.01(0.52-1.93) | 9.86E-01 | 9.86E-01 |
| rs130007   | 16 CREBBP | 0.01 Add | 1.01(0.52-1.93) | 9.86E-01 | 9.86E-01 |
| rs130005   | 16 CREBBP | 0.31 Add | 1.11(0.96-1.28) | 1.65E-01 | 9.94E-01 |
| rs8052927  | 16 CREBBP | 0.22 Rec | 0.73(0.45-1.18) | 2.02E-01 | 9.98E-01 |
| rs2540044  | 16 CREBBP | 0.02 Add | 0.8(0.49-1.32)  | 3.88E-01 | 9.99E-01 |
| rs2526687  | 16 CREBBP | 0.02 Add | 0.8(0.49-1.32)  | 3.88E-01 | 9.99E-01 |
| rs130028   | 16 CREBBP | 0.02 Add | 0.81(0.48-1.36) | 4.24E-01 | 9.99E-01 |

|            |           |          |                 |          |          |
|------------|-----------|----------|-----------------|----------|----------|
| rs2191416  | 16 CREBBP | 0.38 Rec | 0.9(0.68-1.17)  | 4.24E-01 | 9.99E-01 |
| rs2239318  | 16 CREBBP | 0.30 Dom | 1.12(0.92-1.35) | 2.59E-01 | 9.99E-01 |
| rs130052   | 16 CREBBP | 0.31 Dom | 1.12(0.92-1.36) | 2.50E-01 | 9.99E-01 |
| rs3025684  | 16 CREBBP | 0.22 Add | 0.93(0.79-1.1)  | 3.78E-01 | 9.99E-01 |
| rs11076786 | 16 CREBBP | 0.19 Rec | 1.22(0.76-1.98) | 4.10E-01 | 9.99E-01 |
| rs3025697  | 16 CREBBP | 0.02 Add | 0.82(0.49-1.38) | 4.54E-01 | 9.99E-01 |
| rs13334803 | 16 CREBBP | 0.02 Add | 0.82(0.5-1.37)  | 4.55E-01 | 9.99E-01 |
| rs2239317  | 16 CREBBP | 0.30 Add | 1.08(0.93-1.25) | 3.02E-01 | 9.99E-01 |
| rs11644593 | 16 CREBBP | 0.30 Add | 1.08(0.93-1.25) | 3.08E-01 | 9.99E-01 |
| rs2239316  | 16 CREBBP | 0.33 Dom | 1.02(0.84-1.23) | 8.56E-01 | 1.00E+00 |
| rs6500556  | 16 CREBBP | 0.02 Add | 0.86(0.52-1.43) | 5.64E-01 | 1.00E+00 |
| rs9921319  | 16 CREBBP | 0.02 Add | 0.86(0.52-1.43) | 5.64E-01 | 1.00E+00 |
| rs2526691  | 16 CREBBP | 0.22 Rec | 0.79(0.49-1.28) | 3.43E-01 | 1.00E+00 |
| rs4567717  | 16 CREBBP | 0.02 Add | 0.87(0.53-1.41) | 5.62E-01 | 1.00E+00 |
| rs130002   | 16 CREBBP | 0.21 Add | 0.92(0.77-1.09) | 3.19E-01 | 1.00E+00 |
| rs130046   | 16 CREBBP | 0.02 Add | 0.85(0.51-1.42) | 5.36E-01 | 1.00E+00 |
| rs6500553  | 16 CREBBP | 0.02 Add | 0.85(0.51-1.42) | 5.42E-01 | 1.00E+00 |
| rs9936092  | 16 CREBBP | 0.02 Add | 0.85(0.51-1.42) | 5.42E-01 | 1.00E+00 |
| rs11864123 | 16 CREBBP | 0.22 Add | 0.94(0.8-1.11)  | 4.52E-01 | 1.00E+00 |
| rs130037   | 16 CREBBP | 0.02 Add | 0.85(0.51-1.42) | 5.42E-01 | 1.00E+00 |
| rs12051375 | 16 CREBBP | 0.21 Add | 0.92(0.78-1.09) | 3.43E-01 | 1.00E+00 |
| rs129968   | 16 CREBBP | 0.44 Dom | 1.11(0.9-1.37)  | 3.26E-01 | 1.00E+00 |
| rs9931922  | 16 CREBBP | 0.15 Add | 0.93(0.76-1.13) | 4.68E-01 | 1.00E+00 |
| rs129963   | 16 CREBBP | 0.14 Rec | 0.65(0.28-1.5)  | 3.13E-01 | 1.00E+00 |
| rs129993   | 16 CREBBP | 0.19 Dom | 0.95(0.77-1.16) | 5.93E-01 | 1.00E+00 |
| rs9940938  | 16 CREBBP | 0.02 Add | 0.88(0.53-1.46) | 6.19E-01 | 1.00E+00 |
| rs129982   | 16 CREBBP | 0.19 Dom | 0.95(0.78-1.16) | 6.13E-01 | 1.00E+00 |
| rs2110534  | 16 CREBBP | 0.02 Add | 0.89(0.53-1.49) | 6.58E-01 | 1.00E+00 |
| rs886528   | 16 CREBBP | 0.44 Rec | 1.02(0.8-1.3)   | 8.60E-01 | 1.00E+00 |
| rs2540038  | 16 CREBBP | 0.02 Add | 0.9(0.54-1.5)   | 6.79E-01 | 1.00E+00 |
| rs130025   | 16 CREBBP | 0.02 Add | 0.9(0.53-1.51)  | 6.81E-01 | 1.00E+00 |
| rs13380693 | 16 CREBBP | 0.23 Rec | 0.91(0.58-1.43) | 6.77E-01 | 1.00E+00 |
| rs13332076 | 16 CREBBP | 0.01 Add | 1.12(0.62-2.02) | 7.05E-01 | 1.00E+00 |
| rs7202140  | 16 CREBBP | 0.23 Rec | 0.92(0.58-1.46) | 7.33E-01 | 1.00E+00 |

|            |           |          |                 |          |          |
|------------|-----------|----------|-----------------|----------|----------|
| rs9392     | 16 CREBBP | 0.43 Rec | 0.99(0.78-1.26) | 9.42E-01 | 1.00E+00 |
| rs9929384  | 16 CREBBP | 0.02 Add | 0.91(0.54-1.52) | 7.21E-01 | 1.00E+00 |
| rs8047652  | 16 CREBBP | 0.22 Rec | 0.84(0.52-1.35) | 4.61E-01 | 1.00E+00 |
| rs8044812  | 16 CREBBP | 0.01 Dom | 1.11(0.62-2)    | 7.30E-01 | 1.00E+00 |
| rs9302779  | 16 CREBBP | 0.20 Dom | 0.96(0.79-1.17) | 7.04E-01 | 1.00E+00 |
| rs129985   | 16 CREBBP | 0.01 Add | 1.06(0.56-2)    | 8.61E-01 | 1.00E+00 |
| rs130051   | 16 CREBBP | 0.19 Add | 0.97(0.82-1.16) | 7.45E-01 | 1.00E+00 |
| rs130018   | 16 CREBBP | 0.01 Add | 1.08(0.6-1.95)  | 7.89E-01 | 1.00E+00 |
| rs130045   | 16 CREBBP | 0.01 Add | 1.08(0.6-1.95)  | 7.89E-01 | 1.00E+00 |
| rs1296721  | 16 CREBBP | 0.01 Add | 1.08(0.6-1.95)  | 7.89E-01 | 1.00E+00 |
| rs3025702  | 16 CREBBP | 0.01 Add | 1.08(0.6-1.95)  | 7.89E-01 | 1.00E+00 |
| rs130030   | 16 CREBBP | 0.01 Add | 1.08(0.6-1.95)  | 7.89E-01 | 1.00E+00 |
| rs8055118  | 16 CREBBP | 0.01 Add | 1.08(0.6-1.95)  | 7.89E-01 | 1.00E+00 |
| rs129984   | 16 CREBBP | 0.19 Rec | 0.96(0.57-1.64) | 8.93E-01 | 1.00E+00 |
| rs8046065  | 16 CREBBP | 0.07 Add | 0.96(0.74-1.25) | 7.75E-01 | 1.00E+00 |
| rs4076452  | 17 CRHR1  | 0.11 Rec | 4.47(2.15-9.31) | 6.35E-05 | 8.18E-04 |
| rs12953076 | 17 CRHR1  | 0.10 Rec | 4.72(2.16-10.3) | 1.00E-04 | 1.14E-03 |
| rs4074461  | 17 CRHR1  | 0.11 Rec | 3.91(1.94-7.88) | 1.43E-04 | 2.37E-03 |
| rs110402   | 17 CRHR1  | 0.09 Add | 1.34(1.08-1.68) | 9.22E-03 | 7.49E-02 |
| rs7209436  | 17 CRHR1  | 0.09 Add | 1.34(1.07-1.68) | 9.61E-03 | 7.69E-02 |
| rs12944712 | 17 CRHR1  | 0.09 Add | 1.33(1.07-1.67) | 1.13E-02 | 8.76E-02 |
| rs242924   | 17 CRHR1  | 0.07 Add | 1.33(1.04-1.71) | 2.45E-02 | 1.53E-01 |
| rs173365   | 17 CRHR1  | 0.10 Dom | 1.25(0.98-1.58) | 7.23E-02 | 2.94E-01 |
| rs81189    | 17 CRHR1  | 0.12 Add | 1.22(1-1.49)    | 5.20E-02 | 3.80E-01 |
| rs171440   | 17 CRHR1  | 0.12 Add | 1.22(1-1.49)    | 5.20E-02 | 3.80E-01 |
| rs17689966 | 17 CRHR1  | 0.19 Dom | 0.93(0.76-1.13) | 4.58E-01 | 9.07E-01 |
| rs17763658 | 17 CRHR1  | 0.16 Rec | 0.81(0.41-1.57) | 5.25E-01 | 9.27E-01 |
| rs242942   | 17 CRHR1  | 0.01 Dom | 1.03(0.59-1.8)  | 9.14E-01 | 9.51E-01 |
| rs3785877  | 17 CRHR1  | 0.01 Dom | 1.03(0.59-1.8)  | 9.14E-01 | 9.51E-01 |
| rs242944   | 17 CRHR1  | 0.20 Rec | 0.9(0.56-1.46)  | 6.78E-01 | 9.64E-01 |
| rs1611115  | 9 DBH     | 0.16 Dom | 1.29(1.05-1.59) | 1.51E-02 | 5.73E-01 |
| rs2519143  | 9 DBH     | 0.16 Dom | 1.26(1.03-1.55) | 2.64E-02 | 7.50E-01 |
| rs10993950 | 9 DBH     | 0.05 Dom | 1.33(0.98-1.8)  | 7.04E-02 | 8.55E-01 |
| rs7851898  | 9 DBH     | 0.47 Rec | 1.26(1.01-1.59) | 4.23E-02 | 8.74E-01 |

|            |       |          |                 |          |          |
|------------|-------|----------|-----------------|----------|----------|
| rs3025373  | 9 DBH | 0.08 Add | 0.8(0.61-1.04)  | 9.82E-02 | 8.81E-01 |
| rs129886   | 9 DBH | 0.39 Dom | 0.82(0.67-1)    | 4.76E-02 | 8.90E-01 |
| rs6479643  | 9 DBH | 0.27 Add | 1.16(0.99-1.35) | 6.12E-02 | 9.38E-01 |
| rs5320     | 9 DBH | 0.14 Rec | 1.11(0.56-2.17) | 7.70E-01 | 9.47E-01 |
| rs129885   | 9 DBH | 0.39 Dom | 0.83(0.68-1.01) | 6.67E-02 | 9.48E-01 |
| rs3025369  | 9 DBH | 0.18 Rec | 1.07(0.62-1.87) | 8.04E-01 | 9.49E-01 |
| rs2283124  | 9 DBH | 0.14 Rec | 1.81(0.92-3.57) | 8.39E-02 | 9.76E-01 |
| rs2283123  | 9 DBH | 0.14 Rec | 1.81(0.92-3.57) | 8.39E-02 | 9.77E-01 |
| rs1611118  | 9 DBH | 0.03 Add | 0.76(0.49-1.17) | 2.07E-01 | 9.86E-01 |
| rs3025399  | 9 DBH | 0.10 Dom | 0.96(0.75-1.22) | 7.36E-01 | 9.89E-01 |
| rs129931   | 9 DBH | 0.22 Add | 1.14(0.97-1.34) | 1.12E-01 | 9.91E-01 |
| rs1076150  | 9 DBH | 0.10 Add | 0.85(0.67-1.08) | 1.93E-01 | 9.91E-01 |
| rs10993885 | 9 DBH | 0.45 Add | 1.1(0.96-1.26)  | 1.59E-01 | 9.92E-01 |
| rs129882   | 9 DBH | 0.37 Add | 0.9(0.78-1.04)  | 1.56E-01 | 9.93E-01 |
| rs3025425  | 9 DBH | 0.08 Dom | 1.18(0.91-1.52) | 2.08E-01 | 9.93E-01 |
| rs129915   | 9 DBH | 0.44 Dom | 0.85(0.69-1.06) | 1.42E-01 | 9.95E-01 |
| rs129884   | 9 DBH | 0.37 Dom | 0.86(0.71-1.05) | 1.36E-01 | 9.95E-01 |
| rs129930   | 9 DBH | 0.16 Rec | 1.56(0.87-2.8)  | 1.36E-01 | 9.96E-01 |
| rs13306304 | 9 DBH | 0.16 Rec | 1.56(0.87-2.8)  | 1.36E-01 | 9.96E-01 |
| rs1541333  | 9 DBH | 0.11 Rec | 0.89(0.4-1.98)  | 7.74E-01 | 9.96E-01 |
| rs3025382  | 9 DBH | 0.02 Add | 0.78(0.49-1.26) | 3.12E-01 | 9.97E-01 |
| rs2519148  | 9 DBH | 0.42 Add | 1.09(0.95-1.25) | 2.07E-01 | 9.97E-01 |
| rs12337651 | 9 DBH | 0.03 Dom | 1.09(0.72-1.67) | 6.78E-01 | 9.98E-01 |
| rs1548367  | 9 DBH | 0.03 Dom | 0.8(0.52-1.24)  | 3.20E-01 | 9.98E-01 |
| rs129888   | 9 DBH | 0.39 Rec | 1.2(0.92-1.57)  | 1.85E-01 | 9.99E-01 |
| rs129928   | 9 DBH | 0.39 Rec | 1.2(0.92-1.57)  | 1.85E-01 | 9.99E-01 |
| rs1108580  | 9 DBH | 0.16 Add | 0.89(0.73-1.07) | 2.01E-01 | 9.99E-01 |
| rs77905    | 9 DBH | 0.09 Add | 1.11(0.88-1.4)  | 3.65E-01 | 9.99E-01 |
| rs1611119  | 9 DBH | 0.02 Add | 0.79(0.46-1.36) | 4.01E-01 | 9.99E-01 |
| rs2519154  | 9 DBH | 0.11 Add | 0.95(0.77-1.18) | 6.52E-01 | 9.99E-01 |
| rs2073835  | 9 DBH | 0.39 Rec | 1.19(0.91-1.55) | 2.14E-01 | 9.99E-01 |
| rs1108581  | 9 DBH | 0.16 Add | 0.91(0.76-1.09) | 3.13E-01 | 1.00E+00 |
| rs2073833  | 9 DBH | 0.46 Add | 0.94(0.82-1.08) | 3.56E-01 | 1.00E+00 |
| rs1611122  | 9 DBH | 0.16 Dom | 0.89(0.72-1.1)  | 2.75E-01 | 1.00E+00 |

|            |       |          |                 |          |          |
|------------|-------|----------|-----------------|----------|----------|
| rs2519147  | 9 DBH | 0.03 Add | 1.15(0.78-1.69) | 4.84E-01 | 1.00E+00 |
| rs2873804  | 9 DBH | 0.16 Rec | 0.81(0.44-1.47) | 4.83E-01 | 1.00E+00 |
| rs1611114  | 9 DBH | 0.33 Dom | 1.11(0.91-1.34) | 3.02E-01 | 1.00E+00 |
| rs1611125  | 9 DBH | 0.16 Dom | 0.88(0.72-1.09) | 2.51E-01 | 1.00E+00 |
| rs3025388  | 9 DBH | 0.16 Add | 0.91(0.75-1.09) | 3.00E-01 | 1.00E+00 |
| rs3739885  | 9 DBH | 0.02 Add | 0.83(0.52-1.33) | 4.48E-01 | 1.00E+00 |
| rs10993949 | 9 DBH | 0.10 Dom | 1.11(0.87-1.41) | 3.98E-01 | 1.00E+00 |
| rs1548364  | 9 DBH | 0.16 Rec | 0.8(0.44-1.46)  | 4.62E-01 | 1.00E+00 |
| rs2007153  | 9 DBH | 0.32 Dom | 1.07(0.88-1.3)  | 4.78E-01 | 1.00E+00 |
| rs3025422  | 9 DBH | 0.10 Add | 1.09(0.87-1.36) | 4.69E-01 | 1.00E+00 |
| rs2097628  | 9 DBH | 0.08 Dom | 0.9(0.68-1.2)   | 4.79E-01 | 1.00E+00 |
| rs732833   | 9 DBH | 0.46 Rec | 0.93(0.74-1.18) | 5.76E-01 | 1.00E+00 |
| rs2097629  | 9 DBH | 0.45 Add | 0.96(0.83-1.1)  | 5.33E-01 | 1.00E+00 |
| rs1611123  | 9 DBH | 0.14 Dom | 0.91(0.73-1.13) | 3.97E-01 | 1.00E+00 |
| rs3025406  | 9 DBH | 0.14 Dom | 0.9(0.72-1.12)  | 3.34E-01 | 1.00E+00 |
| rs1076153  | 9 DBH | 0.34 Dom | 1.1(0.91-1.33)  | 3.40E-01 | 1.00E+00 |
| rs1541332  | 9 DBH | 0.03 Dom | 0.91(0.62-1.33) | 6.29E-01 | 1.00E+00 |
| rs1076152  | 9 DBH | 0.26 Dom | 1.1(0.9-1.33)   | 3.46E-01 | 1.00E+00 |
| rs10993948 | 9 DBH | 0.09 Add | 1.06(0.85-1.33) | 6.11E-01 | 1.00E+00 |
| rs1611120  | 9 DBH | 0.13 Dom | 0.91(0.73-1.14) | 4.21E-01 | 1.00E+00 |
| rs6593011  | 7 DDC | 0.01 Add | 0.32(0.15-0.71) | 4.72E-03 | 6.12E-02 |
| rs6263     | 7 DDC | 0.06 Dom | 0.73(0.53-0.99) | 4.28E-02 | 6.96E-01 |
| rs6951648  | 7 DDC | 0.02 Dom | 0.63(0.39-1.03) | 6.58E-02 | 7.61E-01 |
| rs11575516 | 7 DDC | 0.06 Dom | 0.74(0.55-1.01) | 5.57E-02 | 7.75E-01 |
| rs1376523  | 7 DDC | 0.11 Dom | 0.76(0.6-0.98)  | 3.08E-02 | 7.76E-01 |
| rs11575506 | 7 DDC | 0.08 Add | 1.25(0.98-1.58) | 7.16E-02 | 8.74E-01 |
| rs11575288 | 7 DDC | 0.14 Add | 0.84(0.68-1.02) | 8.20E-02 | 9.75E-01 |
| rs11575383 | 7 DDC | 0.02 Add | 0.73(0.46-1.16) | 1.78E-01 | 9.78E-01 |
| rs11575388 | 7 DDC | 0.02 Add | 0.73(0.46-1.16) | 1.78E-01 | 9.79E-01 |
| rs11575489 | 7 DDC | 0.06 Dom | 0.81(0.6-1.09)  | 1.61E-01 | 9.82E-01 |
| rs4947511  | 7 DDC | 0.07 Add | 1.2(0.93-1.54)  | 1.56E-01 | 9.82E-01 |
| rs11575553 | 7 DDC | 0.09 Dom | 1(0.77-1.29)    | 9.91E-01 | 9.91E-01 |
| rs17133842 | 7 DDC | 0.02 Add | 0.77(0.49-1.22) | 2.67E-01 | 9.97E-01 |
| rs4329234  | 7 DDC | 0.34 Add | 0.91(0.79-1.05) | 2.03E-01 | 9.98E-01 |



|            |       |          |                 |          |          |
|------------|-------|----------|-----------------|----------|----------|
| rs17133853 | 7 DDC | 0.02 Add | 0.75(0.45-1.25) | 2.75E-01 | 9.98E-01 |
| rs7791875  | 7 DDC | 0.02 Add | 0.75(0.45-1.25) | 2.75E-01 | 9.98E-01 |
| rs11575387 | 7 DDC | 0.02 Add | 0.75(0.45-1.25) | 2.75E-01 | 9.98E-01 |
| rs17133881 | 7 DDC | 0.03 Add | 0.79(0.51-1.21) | 2.81E-01 | 9.98E-01 |
| rs11575450 | 7 DDC | 0.02 Add | 0.78(0.49-1.23) | 2.83E-01 | 9.98E-01 |
| rs17152014 | 7 DDC | 0.02 Add | 0.78(0.49-1.23) | 2.89E-01 | 9.98E-01 |
| rs2329340  | 7 DDC | 0.47 Dom | 0.86(0.7-1.06)  | 1.55E-01 | 9.99E-01 |
| rs1451374  | 7 DDC | 0.47 Dom | 0.86(0.7-1.06)  | 1.55E-01 | 9.99E-01 |
| rs1451373  | 7 DDC | 0.47 Dom | 0.86(0.7-1.06)  | 1.55E-01 | 9.99E-01 |
| rs4452748  | 7 DDC | 0.47 Dom | 0.86(0.7-1.06)  | 1.55E-01 | 9.99E-01 |
| rs6949897  | 7 DDC | 0.47 Dom | 0.86(0.7-1.06)  | 1.55E-01 | 9.99E-01 |
| rs921450   | 7 DDC | 0.47 Dom | 0.86(0.7-1.06)  | 1.55E-01 | 9.99E-01 |
| rs1451375  | 7 DDC | 0.47 Dom | 0.86(0.7-1.06)  | 1.55E-01 | 9.99E-01 |
| rs921451   | 7 DDC | 0.47 Dom | 0.86(0.7-1.06)  | 1.55E-01 | 9.99E-01 |
| rs10250513 | 7 DDC | 0.47 Dom | 0.86(0.7-1.06)  | 1.55E-01 | 9.99E-01 |
| rs2329342  | 7 DDC | 0.47 Dom | 0.86(0.7-1.06)  | 1.55E-01 | 9.99E-01 |
| rs2876829  | 7 DDC | 0.48 Dom | 1.12(0.9-1.39)  | 3.09E-01 | 9.99E-01 |
| rs3807558  | 7 DDC | 0.48 Dom | 1.12(0.9-1.39)  | 3.09E-01 | 9.99E-01 |
| rs2329367  | 7 DDC | 0.09 Dom | 1.01(0.79-1.3)  | 9.37E-01 | 9.99E-01 |
| rs17634958 | 7 DDC | 0.09 Dom | 1.01(0.79-1.3)  | 9.37E-01 | 9.99E-01 |
| rs11238131 | 7 DDC | 0.49 Add | 0.92(0.8-1.05)  | 2.20E-01 | 9.99E-01 |
| rs896307   | 7 DDC | 0.48 Dom | 1.12(0.9-1.39)  | 3.12E-01 | 9.99E-01 |
| rs6592952  | 7 DDC | 0.34 Add | 0.92(0.8-1.06)  | 2.43E-01 | 9.99E-01 |
| rs17733244 | 7 DDC | 0.48 Dom | 1.11(0.9-1.38)  | 3.26E-01 | 9.99E-01 |
| rs11763051 | 7 DDC | 0.03 Add | 0.81(0.54-1.23) | 3.31E-01 | 9.99E-01 |
| rs4245549  | 7 DDC | 0.03 Add | 0.81(0.54-1.23) | 3.31E-01 | 9.99E-01 |
| rs11771860 | 7 DDC | 0.03 Add | 0.81(0.54-1.23) | 3.31E-01 | 9.99E-01 |
| rs4947631  | 7 DDC | 0.03 Add | 0.81(0.54-1.23) | 3.31E-01 | 9.99E-01 |
| rs2167363  | 7 DDC | 0.03 Add | 0.81(0.54-1.23) | 3.31E-01 | 9.99E-01 |
| rs4602840  | 7 DDC | 0.09 Dom | 1(0.78-1.29)    | 9.79E-01 | 1.00E+00 |
| rs17665398 | 7 DDC | 0.07 Dom | 1.15(0.88-1.51) | 3.14E-01 | 1.00E+00 |
| rs7792474  | 7 DDC | 0.07 Dom | 1.15(0.88-1.51) | 3.14E-01 | 1.00E+00 |
| rs11575413 | 7 DDC | 0.07 Dom | 1.14(0.86-1.5)  | 3.64E-01 | 1.00E+00 |
| rs3735275  | 7 DDC | 0.46 Add | 1.08(0.94-1.24) | 2.61E-01 | 1.00E+00 |

|            |       |          |                 |          |          |
|------------|-------|----------|-----------------|----------|----------|
| rs7790758  | 7 DDC | 0.48 Dom | 1.1(0.89-1.37)  | 3.84E-01 | 1.00E+00 |
| rs7786398  | 7 DDC | 0.47 Dom | 0.87(0.71-1.08) | 2.17E-01 | 1.00E+00 |
| rs7790230  | 7 DDC | 0.45 Add | 0.93(0.81-1.06) | 2.84E-01 | 1.00E+00 |
| rs1966839  | 7 DDC | 0.46 Dom | 0.88(0.71-1.08) | 2.25E-01 | 1.00E+00 |
| rs4947510  | 7 DDC | 0.45 Add | 0.93(0.81-1.07) | 3.05E-01 | 1.00E+00 |
| rs2060762  | 7 DDC | 0.46 Dom | 1.13(0.92-1.4)  | 2.46E-01 | 1.00E+00 |
| rs896309   | 7 DDC | 0.44 Dom | 1.08(0.88-1.33) | 4.52E-01 | 1.00E+00 |
| rs3807566  | 7 DDC | 0.34 Add | 0.94(0.81-1.08) | 3.59E-01 | 1.00E+00 |
| rs6962356  | 7 DDC | 0.44 Dom | 0.89(0.72-1.09) | 2.60E-01 | 1.00E+00 |
| rs6969081  | 7 DDC | 0.44 Dom | 0.89(0.72-1.09) | 2.60E-01 | 1.00E+00 |
| rs4947594  | 7 DDC | 0.07 Dom | 1(0.76-1.34)    | 9.75E-01 | 1.00E+00 |
| rs2122817  | 7 DDC | 0.09 Dom | 1.01(0.78-1.29) | 9.65E-01 | 1.00E+00 |
| rs1107743  | 7 DDC | 0.09 Dom | 1.01(0.78-1.29) | 9.65E-01 | 1.00E+00 |
| rs4580999  | 7 DDC | 0.41 Dom | 0.89(0.73-1.09) | 2.66E-01 | 1.00E+00 |
| rs12718528 | 7 DDC | 0.41 Dom | 0.89(0.73-1.09) | 2.66E-01 | 1.00E+00 |
| rs11238138 | 7 DDC | 0.41 Dom | 0.89(0.73-1.09) | 2.66E-01 | 1.00E+00 |
| rs2329365  | 7 DDC | 0.41 Dom | 0.89(0.73-1.09) | 2.66E-01 | 1.00E+00 |
| rs4992502  | 7 DDC | 0.41 Dom | 0.89(0.73-1.09) | 2.66E-01 | 1.00E+00 |
| rs4579483  | 7 DDC | 0.41 Dom | 0.89(0.73-1.09) | 2.66E-01 | 1.00E+00 |
| rs1349492  | 7 DDC | 0.41 Dom | 0.89(0.73-1.09) | 2.66E-01 | 1.00E+00 |
| rs2876827  | 7 DDC | 0.41 Dom | 0.89(0.73-1.09) | 2.66E-01 | 1.00E+00 |
| rs3823674  | 7 DDC | 0.34 Dom | 0.93(0.77-1.13) | 4.65E-01 | 1.00E+00 |
| rs12718574 | 7 DDC | 0.34 Dom | 0.93(0.77-1.13) | 4.65E-01 | 1.00E+00 |
| rs17133878 | 7 DDC | 0.44 Dom | 0.91(0.74-1.11) | 3.56E-01 | 1.00E+00 |
| rs2242041  | 7 DDC | 0.09 Dom | 1(0.77-1.29)    | 9.74E-01 | 1.00E+00 |
| rs4947644  | 7 DDC | 0.44 Rec | 1.14(0.9-1.44)  | 2.83E-01 | 1.00E+00 |
| rs731689   | 7 DDC | 0.08 Add | 1.09(0.85-1.4)  | 4.90E-01 | 1.00E+00 |
| rs12718529 | 7 DDC | 0.41 Dom | 0.9(0.74-1.1)   | 2.91E-01 | 1.00E+00 |
| rs4433100  | 7 DDC | 0.41 Dom | 0.9(0.74-1.1)   | 2.91E-01 | 1.00E+00 |
| rs12718527 | 7 DDC | 0.41 Dom | 0.9(0.74-1.1)   | 2.91E-01 | 1.00E+00 |
| rs3887825  | 7 DDC | 0.41 Dom | 0.9(0.74-1.1)   | 2.91E-01 | 1.00E+00 |
| rs3735273  | 7 DDC | 0.43 Rec | 1.09(0.85-1.39) | 5.05E-01 | 1.00E+00 |
| rs6950777  | 7 DDC | 0.43 Rec | 1.09(0.85-1.39) | 5.05E-01 | 1.00E+00 |
| rs9942686  | 7 DDC | 0.43 Rec | 1.09(0.85-1.39) | 5.05E-01 | 1.00E+00 |

|            |       |          |                 |          |          |
|------------|-------|----------|-----------------|----------|----------|
| rs1451368  | 7 DDC | 0.19 Add | 0.93(0.79-1.11) | 4.39E-01 | 1.00E+00 |
| rs3779078  | 7 DDC | 0.43 Rec | 1.09(0.85-1.39) | 5.07E-01 | 1.00E+00 |
| rs10276473 | 7 DDC | 0.43 Rec | 1.09(0.85-1.39) | 5.07E-01 | 1.00E+00 |
| rs11575320 | 7 DDC | 0.43 Rec | 1.09(0.85-1.39) | 5.07E-01 | 1.00E+00 |
| rs2329371  | 7 DDC | 0.43 Rec | 1.09(0.85-1.39) | 5.07E-01 | 1.00E+00 |
| rs3807556  | 7 DDC | 0.43 Rec | 1.09(0.85-1.39) | 5.07E-01 | 1.00E+00 |
| rs3807555  | 7 DDC | 0.43 Rec | 1.09(0.85-1.39) | 5.07E-01 | 1.00E+00 |
| rs11772714 | 7 DDC | 0.41 Dom | 1.11(0.91-1.36) | 3.01E-01 | 1.00E+00 |
| rs4947535  | 7 DDC | 0.50 Rec | 0.89(0.71-1.11) | 3.05E-01 | 1.00E+00 |
| rs17665588 | 7 DDC | 0.06 Dom | 1.1(0.82-1.46)  | 5.26E-01 | 1.00E+00 |
| rs4948197  | 7 DDC | 0.06 Dom | 1.1(0.82-1.46)  | 5.26E-01 | 1.00E+00 |
| rs4947576  | 7 DDC | 0.06 Dom | 1.1(0.82-1.46)  | 5.26E-01 | 1.00E+00 |
| rs732215   | 7 DDC | 0.43 Dom | 0.97(0.79-1.19) | 7.98E-01 | 1.00E+00 |
| rs11575321 | 7 DDC | 0.10 Dom | 1.03(0.81-1.32) | 8.12E-01 | 1.00E+00 |
| rs11575313 | 7 DDC | 0.10 Dom | 1.03(0.81-1.32) | 8.12E-01 | 1.00E+00 |
| rs11575322 | 7 DDC | 0.10 Dom | 1.03(0.81-1.32) | 8.12E-01 | 1.00E+00 |
| rs2100280  | 7 DDC | 0.19 Dom | 0.94(0.77-1.15) | 5.34E-01 | 1.00E+00 |
| rs12535064 | 7 DDC | 0.20 Rec | 0.77(0.46-1.29) | 3.23E-01 | 1.00E+00 |
| rs10499695 | 7 DDC | 0.44 Rec | 1.13(0.89-1.43) | 3.18E-01 | 1.00E+00 |
| rs12538830 | 7 DDC | 0.20 Rec | 0.77(0.46-1.29) | 3.23E-01 | 1.00E+00 |
| rs10271341 | 7 DDC | 0.43 Rec | 1.08(0.85-1.37) | 5.46E-01 | 1.00E+00 |
| rs7785224  | 7 DDC | 0.50 Dom | 0.93(0.75-1.16) | 5.44E-01 | 1.00E+00 |
| rs10244632 | 7 DDC | 0.20 Rec | 0.78(0.46-1.3)  | 3.35E-01 | 1.00E+00 |
| rs10249982 | 7 DDC | 0.20 Rec | 0.78(0.46-1.3)  | 3.35E-01 | 1.00E+00 |
| rs1982406  | 7 DDC | 0.20 Rec | 0.78(0.46-1.3)  | 3.35E-01 | 1.00E+00 |
| rs9918702  | 7 DDC | 0.20 Rec | 0.78(0.46-1.3)  | 3.35E-01 | 1.00E+00 |
| rs3735274  | 7 DDC | 0.20 Rec | 0.78(0.46-1.3)  | 3.35E-01 | 1.00E+00 |
| rs6592963  | 7 DDC | 0.19 Dom | 0.94(0.77-1.15) | 5.54E-01 | 1.00E+00 |
| rs730092   | 7 DDC | 0.41 Dom | 0.94(0.77-1.15) | 5.57E-01 | 1.00E+00 |
| rs11768267 | 7 DDC | 0.41 Dom | 0.94(0.77-1.15) | 5.57E-01 | 1.00E+00 |
| rs7808025  | 7 DDC | 0.19 Rec | 0.92(0.55-1.55) | 7.59E-01 | 1.00E+00 |
| rs2122822  | 7 DDC | 0.41 Add | 0.94(0.82-1.08) | 4.06E-01 | 1.00E+00 |
| rs12718541 | 7 DDC | 0.41 Add | 0.94(0.82-1.08) | 4.06E-01 | 1.00E+00 |
| rs11575457 | 7 DDC | 0.41 Add | 0.94(0.82-1.08) | 4.06E-01 | 1.00E+00 |

|            |       |          |                 |          |          |
|------------|-------|----------|-----------------|----------|----------|
| rs10899734 | 7 DDC | 0.41 Add | 0.94(0.82-1.08) | 4.06E-01 | 1.00E+00 |
| rs10899735 | 7 DDC | 0.41 Add | 0.94(0.82-1.08) | 4.06E-01 | 1.00E+00 |
| rs4947577  | 7 DDC | 0.41 Add | 0.94(0.82-1.08) | 4.06E-01 | 1.00E+00 |
| rs1451372  | 7 DDC | 0.41 Add | 0.94(0.82-1.08) | 4.06E-01 | 1.00E+00 |
| rs13311361 | 7 DDC | 0.41 Add | 0.94(0.82-1.08) | 4.06E-01 | 1.00E+00 |
| rs11980368 | 7 DDC | 0.41 Add | 0.94(0.82-1.08) | 4.06E-01 | 1.00E+00 |
| rs4948196  | 7 DDC | 0.41 Add | 0.94(0.82-1.08) | 4.06E-01 | 1.00E+00 |
| rs17133877 | 7 DDC | 0.10 Add | 0.96(0.77-1.21) | 7.58E-01 | 1.00E+00 |
| rs6592961  | 7 DDC | 0.18 Dom | 0.98(0.8-1.2)   | 8.30E-01 | 1.00E+00 |
| rs11575338 | 7 DDC | 0.10 Dom | 1.02(0.8-1.31)  | 8.66E-01 | 1.00E+00 |
| rs4947584  | 7 DDC | 0.19 Rec | 0.92(0.54-1.54) | 7.40E-01 | 1.00E+00 |
| rs7809758  | 7 DDC | 0.19 Rec | 0.92(0.54-1.54) | 7.40E-01 | 1.00E+00 |
| rs2198144  | 7 DDC | 0.19 Rec | 0.92(0.54-1.54) | 7.40E-01 | 1.00E+00 |
| rs10899736 | 7 DDC | 0.40 Dom | 0.93(0.76-1.13) | 4.65E-01 | 1.00E+00 |
| rs1451371  | 7 DDC | 0.40 Dom | 0.93(0.76-1.13) | 4.65E-01 | 1.00E+00 |
| rs4948201  | 7 DDC | 0.07 Dom | 1.02(0.77-1.33) | 9.12E-01 | 1.00E+00 |
| rs10499694 | 7 DDC | 0.38 Rec | 0.95(0.72-1.25) | 7.01E-01 | 1.00E+00 |
| rs1037351  | 7 DDC | 0.12 Add | 0.9(0.73-1.11)  | 3.44E-01 | 1.00E+00 |
| rs17635123 | 7 DDC | 0.10 Add | 1.01(0.8-1.28)  | 9.03E-01 | 1.00E+00 |
| rs4947582  | 7 DDC | 0.40 Dom | 0.93(0.76-1.13) | 4.73E-01 | 1.00E+00 |
| rs3807552  | 7 DDC | 0.41 Add | 1.04(0.91-1.2)  | 5.50E-01 | 1.00E+00 |
| rs3807553  | 7 DDC | 0.10 Add | 1.03(0.82-1.3)  | 8.01E-01 | 1.00E+00 |
| rs11575286 | 7 DDC | 0.10 Add | 1.03(0.82-1.3)  | 8.01E-01 | 1.00E+00 |
| rs1349491  | 7 DDC | 0.10 Add | 1.03(0.82-1.3)  | 8.01E-01 | 1.00E+00 |
| rs2876830  | 7 DDC | 0.10 Add | 1.03(0.82-1.3)  | 8.01E-01 | 1.00E+00 |
| rs7777600  | 7 DDC | 0.10 Add | 0.95(0.76-1.2)  | 6.96E-01 | 1.00E+00 |
| rs11575334 | 7 DDC | 0.38 Dom | 0.96(0.79-1.17) | 6.98E-01 | 1.00E+00 |
| rs998850   | 7 DDC | 0.38 Dom | 0.96(0.79-1.17) | 6.98E-01 | 1.00E+00 |
| rs2329368  | 7 DDC | 0.06 Add | 0.93(0.69-1.27) | 6.59E-01 | 1.00E+00 |
| rs11575453 | 7 DDC | 0.06 Add | 0.93(0.69-1.27) | 6.59E-01 | 1.00E+00 |
| rs2329364  | 7 DDC | 0.09 Add | 0.94(0.75-1.19) | 6.30E-01 | 1.00E+00 |
| rs6944090  | 7 DDC | 0.10 Add | 0.94(0.75-1.19) | 6.26E-01 | 1.00E+00 |
| rs17152020 | 7 DDC | 0.15 Rec | 0.72(0.36-1.45) | 3.60E-01 | 1.00E+00 |
| rs7803247  | 7 DDC | 0.42 Dom | 0.94(0.77-1.16) | 5.82E-01 | 1.00E+00 |

|            |       |          |                 |          |          |
|------------|-------|----------|-----------------|----------|----------|
| rs11575548 | 7 DDC | 0.09 Dom | 0.98(0.76-1.27) | 9.02E-01 | 1.00E+00 |
| rs17634717 | 7 DDC | 0.09 Dom | 0.98(0.76-1.27) | 9.02E-01 | 1.00E+00 |
| rs17665670 | 7 DDC | 0.06 Dom | 1.08(0.81-1.44) | 5.87E-01 | 1.00E+00 |
| rs11575305 | 7 DDC | 0.01 Add | 1.09(0.59-2.01) | 7.86E-01 | 1.00E+00 |
| rs1470750  | 7 DDC | 0.23 Rec | 1.1(0.73-1.65)  | 6.47E-01 | 1.00E+00 |
| rs10228056 | 7 DDC | 0.10 Add | 0.97(0.77-1.22) | 7.89E-01 | 1.00E+00 |
| rs7803440  | 7 DDC | 0.44 Dom | 1.04(0.85-1.28) | 6.84E-01 | 1.00E+00 |
| rs7803788  | 7 DDC | 0.44 Dom | 1.04(0.85-1.28) | 6.84E-01 | 1.00E+00 |
| rs2167364  | 7 DDC | 0.12 Dom | 0.9(0.71-1.13)  | 3.71E-01 | 1.00E+00 |
| rs11575575 | 7 DDC | 0.03 Add | 1.05(0.7-1.57)  | 8.24E-01 | 1.00E+00 |
| rs12718572 | 7 DDC | 0.23 Rec | 1.14(0.75-1.72) | 5.35E-01 | 1.00E+00 |
| rs11761683 | 7 DDC | 0.50 Add | 0.96(0.83-1.09) | 5.05E-01 | 1.00E+00 |
| rs3779084  | 7 DDC | 0.11 Rec | 0.81(0.28-2.29) | 6.86E-01 | 1.00E+00 |
| rs11974297 | 7 DDC | 0.44 Dom | 0.91(0.74-1.12) | 3.80E-01 | 1.00E+00 |
| rs3779075  | 7 DDC | 0.07 Dom | 1.09(0.82-1.43) | 5.59E-01 | 1.00E+00 |
| rs3779076  | 7 DDC | 0.07 Dom | 1.09(0.82-1.43) | 5.59E-01 | 1.00E+00 |
| rs1007702  | 7 DDC | 0.06 Dom | 1.07(0.8-1.43)  | 6.37E-01 | 1.00E+00 |
| rs1817073  | 7 DDC | 0.06 Dom | 1.07(0.8-1.43)  | 6.37E-01 | 1.00E+00 |
| rs1007749  | 7 DDC | 0.06 Dom | 1.07(0.8-1.43)  | 6.37E-01 | 1.00E+00 |
| rs880028   | 7 DDC | 0.12 Rec | 0.84(0.39-1.79) | 6.45E-01 | 1.00E+00 |
| rs4585697  | 7 DDC | 0.19 Rec | 0.8(0.47-1.34)  | 3.91E-01 | 1.00E+00 |
| rs2044859  | 7 DDC | 0.43 Dom | 1.04(0.85-1.28) | 6.75E-01 | 1.00E+00 |
| rs3779074  | 7 DDC | 0.43 Dom | 1.04(0.85-1.28) | 6.75E-01 | 1.00E+00 |
| rs7456339  | 7 DDC | 0.20 Rec | 0.8(0.47-1.34)  | 3.91E-01 | 1.00E+00 |
| rs11765748 | 7 DDC | 0.38 Dom | 0.95(0.78-1.16) | 6.35E-01 | 1.00E+00 |
| rs1470747  | 7 DDC | 0.44 Rec | 1.05(0.83-1.33) | 6.80E-01 | 1.00E+00 |
| rs10265930 | 7 DDC | 0.44 Rec | 1.05(0.83-1.33) | 6.80E-01 | 1.00E+00 |
| rs10249420 | 7 DDC | 0.44 Rec | 1.05(0.83-1.33) | 6.80E-01 | 1.00E+00 |
| rs745043   | 7 DDC | 0.42 Dom | 1.09(0.89-1.34) | 4.00E-01 | 1.00E+00 |
| rs745042   | 7 DDC | 0.42 Dom | 1.09(0.89-1.34) | 4.00E-01 | 1.00E+00 |
| rs11238133 | 7 DDC | 0.50 Dom | 0.91(0.73-1.13) | 3.93E-01 | 1.00E+00 |
| rs1817074  | 7 DDC | 0.18 Rec | 0.89(0.52-1.5)  | 6.56E-01 | 1.00E+00 |
| rs4490786  | 7 DDC | 0.15 Rec | 0.75(0.37-1.51) | 4.22E-01 | 1.00E+00 |
| rs12535024 | 7 DDC | 0.07 Dom | 1.08(0.82-1.42) | 6.02E-01 | 1.00E+00 |

|            |        |          |                 |          |          |
|------------|--------|----------|-----------------|----------|----------|
| rs2168631  | 5 DRD1 | 0.38 Dom | 1.25(1.02-1.52) | 2.78E-02 | 6.98E-01 |
| rs10463051 | 5 DRD1 | 0.24 Dom | 1.21(0.99-1.46) | 5.65E-02 | 8.98E-01 |
| rs17065021 | 5 DRD1 | 0.24 Dom | 1.21(0.99-1.46) | 5.65E-02 | 9.00E-01 |
| rs6882300  | 5 DRD1 | 0.19 Dom | 1.21(0.99-1.47) | 6.38E-02 | 9.23E-01 |
| rs10063286 | 5 DRD1 | 0.19 Dom | 1.21(0.99-1.47) | 6.38E-02 | 9.23E-01 |
| rs4867798  | 5 DRD1 | 0.44 Dom | 1.21(0.98-1.49) | 7.93E-02 | 9.54E-01 |
| rs1310277  | 5 DRD1 | 0.10 Rec | 0.89(0.36-2.2)  | 7.95E-01 | 9.57E-01 |
| rs6878159  | 5 DRD1 | 0.19 Dom | 1.19(0.98-1.46) | 8.19E-02 | 9.60E-01 |
| rs10042826 | 5 DRD1 | 0.20 Dom | 1.19(0.98-1.45) | 8.44E-02 | 9.63E-01 |
| rs7724863  | 5 DRD1 | 0.27 Dom | 1.18(0.98-1.43) | 8.70E-02 | 9.66E-01 |
| rs265974   | 5 DRD1 | 0.47 Dom | 1.19(0.96-1.48) | 1.11E-01 | 9.84E-01 |
| rs10476156 | 5 DRD1 | 0.19 Rec | 0.67(0.4-1.12)  | 1.25E-01 | 9.87E-01 |
| rs10039221 | 5 DRD1 | 0.19 Rec | 0.68(0.41-1.14) | 1.43E-01 | 9.93E-01 |
| rs12518222 | 5 DRD1 | 0.23 Dom | 1.16(0.96-1.41) | 1.34E-01 | 9.94E-01 |
| rs2457090  | 5 DRD1 | 0.14 Dom | 0.85(0.68-1.06) | 1.38E-01 | 9.94E-01 |
| rs265977   | 5 DRD1 | 0.21 Dom | 0.97(0.79-1.18) | 7.42E-01 | 9.96E-01 |
| rs5326     | 5 DRD1 | 0.23 Dom | 1.16(0.95-1.4)  | 1.43E-01 | 9.96E-01 |
| rs11746172 | 5 DRD1 | 0.19 Rec | 0.69(0.41-1.16) | 1.58E-01 | 9.96E-01 |
| rs267417   | 5 DRD1 | 0.14 Dom | 0.85(0.68-1.06) | 1.50E-01 | 9.96E-01 |
| rs2471005  | 5 DRD1 | 0.14 Dom | 0.85(0.69-1.06) | 1.61E-01 | 9.97E-01 |
| rs267416   | 5 DRD1 | 0.47 Rec | 0.85(0.67-1.07) | 1.73E-01 | 9.98E-01 |
| rs265975   | 5 DRD1 | 0.36 Dom | 1.14(0.94-1.39) | 1.85E-01 | 9.99E-01 |
| rs265973   | 5 DRD1 | 0.44 Add | 1.01(0.88-1.15) | 9.10E-01 | 9.99E-01 |
| rs267418   | 5 DRD1 | 0.46 Rec | 0.86(0.68-1.08) | 1.95E-01 | 9.99E-01 |
| rs4867796  | 5 DRD1 | 0.19 Dom | 1.1(0.9-1.34)   | 3.65E-01 | 9.99E-01 |
| rs267405   | 5 DRD1 | 0.45 Rec | 0.86(0.68-1.1)  | 2.27E-01 | 9.99E-01 |
| rs267406   | 5 DRD1 | 0.45 Rec | 0.86(0.68-1.1)  | 2.27E-01 | 9.99E-01 |
| rs267407   | 5 DRD1 | 0.45 Rec | 0.86(0.68-1.1)  | 2.27E-01 | 9.99E-01 |
| rs265981   | 5 DRD1 | 0.13 Add | 0.89(0.72-1.08) | 2.40E-01 | 9.99E-01 |
| rs265978   | 5 DRD1 | 0.14 Dom | 0.87(0.7-1.08)  | 2.06E-01 | 9.99E-01 |
| rs4532     | 5 DRD1 | 0.14 Add | 0.88(0.72-1.08) | 2.32E-01 | 9.99E-01 |
| rs686      | 5 DRD1 | 0.14 Add | 0.88(0.72-1.08) | 2.32E-01 | 9.99E-01 |
| rs863126   | 5 DRD1 | 0.44 Rec | 1.17(0.92-1.48) | 2.07E-01 | 9.99E-01 |
| rs11749676 | 5 DRD1 | 0.13 Add | 0.88(0.72-1.08) | 2.36E-01 | 9.99E-01 |

|            |           |          |                 |          |          |
|------------|-----------|----------|-----------------|----------|----------|
| rs267400   | 5 DRD1    | 0.45 Rec | 0.87(0.68-1.1)  | 2.33E-01 | 9.99E-01 |
| rs11747728 | 5 DRD1    | 0.19 Dom | 1.11(0.91-1.35) | 3.19E-01 | 9.99E-01 |
| rs265968   | 5 DRD1    | 0.34 Dom | 0.89(0.73-1.07) | 2.19E-01 | 9.99E-01 |
| rs11742274 | 5 DRD1    | 0.19 Rec | 0.72(0.43-1.2)  | 2.13E-01 | 9.99E-01 |
| rs835616   | 5 DRD1    | 0.18 Rec | 1.39(0.81-2.38) | 2.38E-01 | 1.00E+00 |
| rs11747886 | 5 DRD1    | 0.18 Dom | 1.09(0.89-1.34) | 3.90E-01 | 1.00E+00 |
| rs4867797  | 5 DRD1    | 0.18 Dom | 1.09(0.89-1.34) | 3.97E-01 | 1.00E+00 |
| rs10042051 | 5 DRD1    | 0.20 Dom | 1.13(0.92-1.37) | 2.43E-01 | 1.00E+00 |
| rs265969   | 5 DRD1    | 0.17 Add | 0.91(0.75-1.09) | 2.93E-01 | 1.00E+00 |
| rs703748   | 5 DRD1    | 0.41 Rec | 0.87(0.67-1.12) | 2.76E-01 | 1.00E+00 |
| rs265972   | 5 DRD1    | 0.36 Rec | 0.87(0.65-1.16) | 3.29E-01 | 1.00E+00 |
| rs265971   | 5 DRD1    | 0.17 Add | 0.91(0.76-1.09) | 3.12E-01 | 1.00E+00 |
| rs251937   | 5 DRD1    | 0.45 Rec | 0.88(0.69-1.12) | 3.07E-01 | 1.00E+00 |
| rs265976   | 5 DRD1    | 0.17 Rec | 0.72(0.39-1.32) | 2.94E-01 | 1.00E+00 |
| rs11749035 | 5 DRD1    | 0.18 Dom | 1.1(0.9-1.35)   | 3.47E-01 | 1.00E+00 |
| rs6881740  | 5 DRD1    | 0.37 Dom | 0.97(0.8-1.18)  | 7.76E-01 | 1.00E+00 |
| rs1587176  | 5 DRD1    | 0.12 Add | 1.03(0.84-1.28) | 7.68E-01 | 1.00E+00 |
| rs11738801 | 5 DRD1    | 0.18 Dom | 1.1(0.9-1.35)   | 3.68E-01 | 1.00E+00 |
| rs11746641 | 5 DRD1    | 0.19 Dom | 1.07(0.87-1.31) | 5.25E-01 | 1.00E+00 |
| rs835540   | 5 DRD1    | 0.48 Dom | 0.96(0.77-1.19) | 6.90E-01 | 1.00E+00 |
| rs2644635  | 5 DRD1    | 0.45 Dom | 1.07(0.87-1.32) | 5.16E-01 | 1.00E+00 |
| rs11954565 | 5 DRD1    | 0.45 Dom | 1.07(0.87-1.32) | 5.16E-01 | 1.00E+00 |
| rs1799914  | 5 DRD1    | 0.08 Add | 1.07(0.83-1.36) | 6.13E-01 | 1.00E+00 |
| rs28465440 | 5 DRD1    | 0.16 Dom | 1.05(0.85-1.29) | 6.58E-01 | 1.00E+00 |
| rs2453737  | 5 DRD1    | 0.38 Rec | 0.95(0.73-1.25) | 7.17E-01 | 1.00E+00 |
| rs11739696 | 5 DRD1    | 0.37 Add | 0.96(0.83-1.1)  | 5.56E-01 | 1.00E+00 |
| rs265967   | 5 DRD1    | 0.37 Add | 0.96(0.83-1.1)  | 5.61E-01 | 1.00E+00 |
| rs2298122  | 10 DRD1IP | 0.07 Add | 1.3(1-1.68)     | 4.86E-02 | 1.65E-01 |
| rs2105341  | 10 DRD1IP | 0.06 Add | 1.25(0.96-1.64) | 9.85E-02 | 2.84E-01 |
| rs11101694 | 10 DRD1IP | 0.06 Add | 1.25(0.96-1.64) | 1.00E-01 | 2.87E-01 |
| rs12244716 | 10 DRD1IP | 0.06 Add | 1.24(0.94-1.64) | 1.21E-01 | 3.31E-01 |
| rs12250582 | 10 DRD1IP | 0.06 Add | 1.24(0.94-1.64) | 1.21E-01 | 3.31E-01 |
| rs7085530  | 10 DRD1IP | 0.06 Add | 1.24(0.94-1.64) | 1.21E-01 | 3.31E-01 |
| rs4838721  | 10 DRD1IP | 0.06 Add | 1.23(0.94-1.6)  | 1.36E-01 | 3.36E-01 |

|            |           |          |                 |          |          |
|------------|-----------|----------|-----------------|----------|----------|
| rs2275723  | 10 DRD1IP | 0.03 Add | 1.18(0.81-1.72) | 3.91E-01 | 3.94E-01 |
| rs10776672 | 10 DRD1IP | 0.03 Dom | 1.24(0.82-1.89) | 3.10E-01 | 5.53E-01 |
| rs2864417  | 10 DRD1IP | 0.03 Dom | 1.24(0.82-1.89) | 3.10E-01 | 5.53E-01 |
| rs1486009  | 3 DRD3    | 0.01 Add | 0.35(0.15-0.81) | 1.48E-02 | 1.33E-01 |
| rs9880168  | 3 DRD3    | 0.12 Add | 1.26(1.02-1.55) | 2.96E-02 | 6.32E-01 |
| rs6787134  | 3 DRD3    | 0.06 Dom | 1.32(0.98-1.78) | 7.24E-02 | 7.23E-01 |
| rs7633291  | 3 DRD3    | 0.27 Add | 1.16(0.99-1.34) | 5.84E-02 | 7.54E-01 |
| rs324036   | 3 DRD3    | 0.17 Add | 1.19(0.99-1.41) | 5.88E-02 | 8.21E-01 |
| rs3773678  | 3 DRD3    | 0.17 Add | 1.18(0.99-1.41) | 6.26E-02 | 8.38E-01 |
| rs2630350  | 3 DRD3    | 0.10 Add | 1.22(0.98-1.52) | 7.14E-02 | 8.72E-01 |
| rs2630351  | 3 DRD3    | 0.10 Add | 1.22(0.98-1.52) | 7.14E-02 | 8.72E-01 |
| rs324032   | 3 DRD3    | 0.10 Add | 1.22(0.98-1.52) | 7.14E-02 | 8.72E-01 |
| rs9825563  | 3 DRD3    | 0.29 Add | 1.14(0.98-1.33) | 8.51E-02 | 9.06E-01 |
| rs10934256 | 3 DRD3    | 0.28 Dom | 1.18(0.98-1.43) | 8.83E-02 | 9.11E-01 |
| rs2630349  | 3 DRD3    | 0.12 Add | 1.19(0.97-1.46) | 1.00E-01 | 9.39E-01 |
| rs324022   | 3 DRD3    | 0.30 Dom | 1.17(0.96-1.41) | 1.17E-01 | 9.55E-01 |
| rs9859762  | 3 DRD3    | 0.02 Add | 0.99(0.57-1.7)  | 9.63E-01 | 9.63E-01 |
| rs1800828  | 3 DRD3    | 0.29 Add | 1.12(0.96-1.3)  | 1.40E-01 | 9.76E-01 |
| rs2399496  | 3 DRD3    | 0.45 Add | 0.9(0.79-1.04)  | 1.42E-01 | 9.76E-01 |
| rs7625282  | 3 DRD3    | 0.28 Dom | 1.15(0.95-1.39) | 1.47E-01 | 9.79E-01 |
| rs324035   | 3 DRD3    | 0.18 Rec | 1.32(0.8-2.2)   | 2.78E-01 | 9.81E-01 |
| rs9880494  | 3 DRD3    | 0.30 Add | 1.11(0.96-1.29) | 1.60E-01 | 9.82E-01 |
| rs226082   | 3 DRD3    | 0.28 Dom | 1.15(0.95-1.39) | 1.62E-01 | 9.82E-01 |
| rs324029   | 3 DRD3    | 0.28 Dom | 1.15(0.95-1.39) | 1.62E-01 | 9.82E-01 |
| rs324030   | 3 DRD3    | 0.28 Dom | 1.15(0.95-1.39) | 1.62E-01 | 9.82E-01 |
| rs1354348  | 3 DRD3    | 0.02 Dom | 0.76(0.45-1.29) | 3.12E-01 | 9.83E-01 |
| rs9817063  | 3 DRD3    | 0.45 Add | 0.92(0.8-1.06)  | 2.34E-01 | 9.86E-01 |
| rs7629232  | 3 DRD3    | 0.30 Add | 1.11(0.95-1.29) | 1.87E-01 | 9.87E-01 |
| rs9824856  | 3 DRD3    | 0.02 Dom | 1.03(0.59-1.79) | 9.19E-01 | 9.88E-01 |
| rs12639080 | 3 DRD3    | 0.30 Add | 1.1(0.94-1.27)  | 2.31E-01 | 9.89E-01 |
| rs11721264 | 3 DRD3    | 0.28 Dom | 1.13(0.94-1.37) | 1.98E-01 | 9.89E-01 |
| rs6280     | 3 DRD3    | 0.31 Add | 1.1(0.95-1.28)  | 1.98E-01 | 9.89E-01 |
| rs324026   | 3 DRD3    | 0.31 Add | 1.1(0.95-1.27)  | 2.18E-01 | 9.91E-01 |
| rs167770   | 3 DRD3    | 0.28 Dom | 1.13(0.93-1.37) | 2.06E-01 | 9.91E-01 |



|            |         |          |                 |          |          |
|------------|---------|----------|-----------------|----------|----------|
| rs1486012  | 3 DRD3  | 0.49 Dom | 1.05(0.84-1.31) | 6.54E-01 | 9.91E-01 |
| rs3732783  | 3 DRD3  | 0.02 Add | 0.8(0.49-1.31)  | 3.75E-01 | 9.92E-01 |
| rs1486008  | 3 DRD3  | 0.02 Add | 0.8(0.49-1.31)  | 3.75E-01 | 9.92E-01 |
| rs7638961  | 3 DRD3  | 0.31 Add | 1.09(0.94-1.27) | 2.29E-01 | 9.93E-01 |
| rs167771   | 3 DRD3  | 0.18 Add | 1.11(0.93-1.32) | 2.40E-01 | 9.94E-01 |
| rs3732790  | 3 DRD3  | 0.35 Dom | 0.92(0.76-1.12) | 4.26E-01 | 9.94E-01 |
| rs10934253 | 3 DRD3  | 0.03 Add | 0.91(0.6-1.37)  | 6.52E-01 | 9.95E-01 |
| rs9682405  | 3 DRD3  | 0.03 Add | 0.91(0.6-1.37)  | 6.52E-01 | 9.95E-01 |
| rs16822393 | 3 DRD3  | 0.01 Dom | 1.14(0.63-2.06) | 6.67E-01 | 9.96E-01 |
| rs1587757  | 3 DRD3  | 0.23 Rec | 1.16(0.76-1.75) | 4.94E-01 | 9.96E-01 |
| rs7638876  | 3 DRD3  | 0.33 Add | 1.06(0.92-1.23) | 4.20E-01 | 9.96E-01 |
| rs1587756  | 3 DRD3  | 0.24 Add | 1.08(0.93-1.27) | 3.19E-01 | 9.97E-01 |
| rs6808291  | 3 DRD3  | 0.03 Add | 0.91(0.61-1.38) | 6.69E-01 | 9.97E-01 |
| rs2134655  | 3 DRD3  | 0.26 Dom | 0.91(0.75-1.11) | 3.49E-01 | 9.97E-01 |
| rs963468   | 3 DRD3  | 0.38 Rec | 0.94(0.72-1.24) | 6.81E-01 | 9.98E-01 |
| rs3773679  | 3 DRD3  | 0.35 Dom | 0.94(0.78-1.15) | 5.66E-01 | 9.98E-01 |
| rs1385884  | 3 DRD3  | 0.49 Rec | 0.94(0.75-1.18) | 5.86E-01 | 9.98E-01 |
| rs2087017  | 3 DRD3  | 0.49 Rec | 0.98(0.78-1.23) | 8.69E-01 | 9.99E-01 |
| rs9869286  | 3 DRD3  | 0.03 Add | 0.94(0.62-1.41) | 7.52E-01 | 9.99E-01 |
| rs11246226 | 11 DRD4 | 0.27 Rec | 1.41(0.99-2.01) | 5.67E-02 | 6.86E-01 |
| rs4331145  | 11 DRD4 | 0.27 Rec | 1.39(0.97-1.99) | 7.43E-02 | 7.73E-01 |
| rs10902188 | 11 DRD4 | 0.18 Dom | 0.87(0.71-1.07) | 2.02E-01 | 9.40E-01 |
| rs4987059  | 11 DRD4 | 0.01 Add | 1.42(0.78-2.59) | 2.49E-01 | 9.41E-01 |
| rs11604855 | 11 DRD4 | 0.18 Add | 0.89(0.74-1.06) | 1.91E-01 | 9.43E-01 |
| rs936465   | 11 DRD4 | 0.26 Rec | 1.3(0.89-1.91)  | 1.74E-01 | 9.51E-01 |
| rs11246228 | 11 DRD4 | 0.45 Dom | 0.9(0.73-1.1)   | 2.89E-01 | 9.67E-01 |
| rs6598007  | 11 DRD4 | 0.29 Rec | 1.2(0.86-1.66)  | 2.79E-01 | 9.79E-01 |
| rs3758653  | 11 DRD4 | 0.27 Add | 0.95(0.82-1.11) | 5.31E-01 | 9.80E-01 |
| rs7932167  | 11 DRD4 | 0.31 Rec | 0.85(0.61-1.19) | 3.49E-01 | 9.80E-01 |
| rs936461   | 11 DRD4 | 0.26 Dom | 0.98(0.81-1.2)  | 8.72E-01 | 9.84E-01 |
| rs12280580 | 11 DRD4 | 0.03 Add | 0.92(0.59-1.43) | 7.11E-01 | 9.86E-01 |
| rs4963126  | 11 DRD4 | 0.48 Dom | 1.03(0.83-1.27) | 8.00E-01 | 9.98E-01 |
| rs2740373  | 11 DRD4 | 0.02 Add | 0.98(0.63-1.52) | 9.13E-01 | 1.00E+00 |
| rs6282     | 4 DRD5  | 0.02 Add | 1.51(0.92-2.49) | 1.05E-01 | 6.29E-01 |

|            |         |          |                 |          |          |
|------------|---------|----------|-----------------|----------|----------|
| rs10001006 | 4 DRD5  | 0.28 Rec | 1.06(0.74-1.52) | 7.63E-01 | 7.63E-01 |
| rs13106539 | 4 DRD5  | 0.19 Add | 1.15(0.97-1.36) | 1.13E-01 | 8.34E-01 |
| rs1519097  | 4 DRD5  | 0.39 Rec | 1.24(0.95-1.62) | 1.12E-01 | 8.48E-01 |
| rs2867383  | 4 DRD5  | 0.49 Add | 1.08(0.94-1.23) | 2.82E-01 | 8.62E-01 |
| rs10939514 | 4 DRD5  | 0.20 Rec | 1.4(0.89-2.22)  | 1.49E-01 | 8.98E-01 |
| rs10939507 | 4 DRD5  | 0.20 Rec | 1.4(0.89-2.22)  | 1.49E-01 | 8.98E-01 |
| rs10939504 | 4 DRD5  | 0.20 Rec | 1.4(0.89-2.22)  | 1.49E-01 | 8.98E-01 |
| rs6449000  | 4 DRD5  | 0.21 Rec | 1.39(0.88-2.18) | 1.59E-01 | 9.06E-01 |
| rs7685396  | 4 DRD5  | 0.19 Rec | 1.3(0.78-2.16)  | 3.12E-01 | 9.09E-01 |
| rs2280207  | 4 DRD5  | 0.19 Rec | 1.3(0.78-2.16)  | 3.12E-01 | 9.09E-01 |
| rs2280206  | 4 DRD5  | 0.19 Rec | 1.3(0.78-2.16)  | 3.12E-01 | 9.09E-01 |
| rs1850744  | 4 DRD5  | 0.21 Rec | 1.34(0.85-2.1)  | 2.09E-01 | 9.10E-01 |
| rs938556   | 4 DRD5  | 0.21 Rec | 1.38(0.88-2.17) | 1.65E-01 | 9.13E-01 |
| rs2280208  | 4 DRD5  | 0.21 Rec | 1.38(0.88-2.17) | 1.65E-01 | 9.13E-01 |
| rs1850739  | 4 DRD5  | 0.21 Rec | 1.38(0.88-2.17) | 1.65E-01 | 9.13E-01 |
| rs10003216 | 4 DRD5  | 0.33 Dom | 0.92(0.76-1.11) | 3.67E-01 | 9.23E-01 |
| rs11731100 | 4 DRD5  | 0.33 Dom | 0.92(0.76-1.11) | 3.67E-01 | 9.23E-01 |
| rs10033951 | 4 DRD5  | 0.44 Dom | 1.11(0.9-1.36)  | 3.26E-01 | 9.33E-01 |
| rs10939515 | 4 DRD5  | 0.31 Add | 0.96(0.83-1.11) | 5.56E-01 | 9.39E-01 |
| rs7655090  | 4 DRD5  | 0.46 Rec | 1.05(0.83-1.33) | 6.97E-01 | 9.67E-01 |
| rs157206   | 1 EPB41 | 0.15 Rec | 0.34(0.14-0.84) | 1.99E-02 | 2.67E-01 |
| rs6656832  | 1 EPB41 | 0.16 Rec | 0.54(0.28-1.04) | 6.47E-02 | 7.03E-01 |
| rs203278   | 1 EPB41 | 0.16 Rec | 0.54(0.28-1.04) | 6.47E-02 | 7.03E-01 |
| rs2985327  | 1 EPB41 | 0.16 Rec | 0.54(0.28-1.04) | 6.47E-02 | 7.03E-01 |
| rs150089   | 1 EPB41 | 0.16 Rec | 0.54(0.28-1.04) | 6.47E-02 | 7.03E-01 |
| rs2985319  | 1 EPB41 | 0.18 Rec | 1.7(1.01-2.88)  | 4.66E-02 | 7.04E-01 |
| rs204058   | 1 EPB41 | 0.16 Rec | 0.54(0.28-1.05) | 6.90E-02 | 7.26E-01 |
| rs2985322  | 1 EPB41 | 0.16 Rec | 0.54(0.28-1.05) | 6.90E-02 | 7.26E-01 |
| rs1185779  | 1 EPB41 | 0.08 Dom | 0.83(0.63-1.08) | 1.64E-01 | 8.21E-01 |
| rs203277   | 1 EPB41 | 0.08 Add | 0.83(0.64-1.07) | 1.47E-01 | 8.27E-01 |
| rs3102739  | 1 EPB41 | 0.08 Add | 0.84(0.65-1.08) | 1.81E-01 | 8.89E-01 |
| rs204060   | 1 EPB41 | 0.08 Add | 0.84(0.65-1.08) | 1.81E-01 | 8.89E-01 |
| rs150085   | 1 EPB41 | 0.08 Add | 0.84(0.65-1.08) | 1.81E-01 | 8.89E-01 |
| rs2930836  | 1 EPB41 | 0.08 Add | 0.84(0.65-1.08) | 1.81E-01 | 8.89E-01 |

|            |         |          |                 |          |          |
|------------|---------|----------|-----------------|----------|----------|
| rs2762682  | 1 EPB41 | 0.08 Add | 0.84(0.65-1.09) | 1.85E-01 | 8.94E-01 |
| rs126014   | 1 EPB41 | 0.08 Dom | 0.83(0.63-1.09) | 1.84E-01 | 9.00E-01 |
| rs2985344  | 1 EPB41 | 0.08 Add | 0.85(0.66-1.09) | 2.01E-01 | 9.10E-01 |
| rs2985331  | 1 EPB41 | 0.08 Dom | 0.85(0.65-1.11) | 2.30E-01 | 9.11E-01 |
| rs2985340  | 1 EPB41 | 0.08 Add | 0.85(0.66-1.1)  | 2.10E-01 | 9.18E-01 |
| rs2993715  | 1 EPB41 | 0.08 Add | 0.85(0.66-1.1)  | 2.10E-01 | 9.18E-01 |
| rs2985334  | 1 EPB41 | 0.08 Dom | 0.84(0.64-1.1)  | 2.09E-01 | 9.19E-01 |
| rs2788889  | 1 EPB41 | 0.08 Add | 0.85(0.66-1.1)  | 2.10E-01 | 9.19E-01 |
| rs2985325  | 1 EPB41 | 0.08 Dom | 0.84(0.64-1.1)  | 2.14E-01 | 9.23E-01 |
| rs2930842  | 1 EPB41 | 0.08 Dom | 0.85(0.65-1.11) | 2.20E-01 | 9.29E-01 |
| rs457618   | 1 EPB41 | 0.09 Dom | 0.85(0.66-1.11) | 2.35E-01 | 9.38E-01 |
| rs2762686  | 1 EPB41 | 0.42 Dom | 1.16(0.94-1.42) | 1.64E-01 | 9.62E-01 |
| rs157220   | 1 EPB41 | 0.09 Dom | 0.86(0.67-1.12) | 2.68E-01 | 9.63E-01 |
| rs2153165  | 1 EPB41 | 0.42 Dom | 1.15(0.94-1.42) | 1.70E-01 | 9.65E-01 |
| rs150083   | 1 EPB41 | 0.42 Dom | 1.15(0.94-1.42) | 1.73E-01 | 9.67E-01 |
| rs157213   | 1 EPB41 | 0.42 Dom | 1.15(0.94-1.42) | 1.73E-01 | 9.67E-01 |
| rs3003628  | 1 EPB41 | 0.42 Dom | 1.15(0.94-1.41) | 1.86E-01 | 9.69E-01 |
| rs6686151  | 1 EPB41 | 0.42 Dom | 1.15(0.94-1.41) | 1.87E-01 | 9.70E-01 |
| rs204057   | 1 EPB41 | 0.16 Rec | 0.67(0.36-1.23) | 1.97E-01 | 9.71E-01 |
| rs4578183  | 1 EPB41 | 0.16 Rec | 0.67(0.36-1.23) | 1.97E-01 | 9.71E-01 |
| rs3003631  | 1 EPB41 | 0.42 Dom | 1.15(0.93-1.41) | 1.91E-01 | 9.72E-01 |
| rs9426306  | 1 EPB41 | 0.42 Dom | 1.14(0.93-1.4)  | 2.15E-01 | 9.72E-01 |
| rs157194   | 1 EPB41 | 0.43 Dom | 1.15(0.94-1.41) | 1.83E-01 | 9.73E-01 |
| rs2486200  | 1 EPB41 | 0.42 Dom | 1.15(0.94-1.41) | 1.83E-01 | 9.73E-01 |
| rs126013   | 1 EPB41 | 0.09 Dom | 0.87(0.67-1.13) | 3.01E-01 | 9.74E-01 |
| rs10915208 | 1 EPB41 | 0.42 Rec | 0.85(0.66-1.1)  | 2.20E-01 | 9.74E-01 |
| rs2985337  | 1 EPB41 | 0.42 Dom | 1.14(0.93-1.4)  | 1.97E-01 | 9.75E-01 |
| rs2788888  | 1 EPB41 | 0.42 Dom | 1.14(0.93-1.4)  | 1.97E-01 | 9.75E-01 |
| rs2788890  | 1 EPB41 | 0.42 Dom | 1.14(0.93-1.4)  | 2.02E-01 | 9.76E-01 |
| rs2985338  | 1 EPB41 | 0.42 Dom | 1.14(0.93-1.4)  | 2.02E-01 | 9.76E-01 |
| rs2993713  | 1 EPB41 | 0.42 Dom | 1.14(0.93-1.4)  | 2.02E-01 | 9.76E-01 |
| rs4360499  | 1 EPB41 | 0.42 Dom | 1.14(0.93-1.4)  | 1.99E-01 | 9.76E-01 |
| rs12045777 | 1 EPB41 | 0.50 Dom | 1.16(0.93-1.44) | 2.02E-01 | 9.76E-01 |
| rs2985328  | 1 EPB41 | 0.16 Rec | 0.67(0.36-1.25) | 2.08E-01 | 9.77E-01 |

|            |         |          |                 |          |          |
|------------|---------|----------|-----------------|----------|----------|
| rs502393   | 1 EPB41 | 0.43 Dom | 1.14(0.92-1.4)  | 2.25E-01 | 9.77E-01 |
| rs12072831 | 1 EPB41 | 0.42 Dom | 1.14(0.93-1.4)  | 2.08E-01 | 9.79E-01 |
| rs157208   | 1 EPB41 | 0.16 Rec | 0.68(0.37-1.26) | 2.20E-01 | 9.81E-01 |
| rs157217   | 1 EPB41 | 0.12 Add | 1(0.81-1.23)    | 9.81E-01 | 9.81E-01 |
| rs157216   | 1 EPB41 | 0.12 Add | 1(0.81-1.23)    | 9.81E-01 | 9.81E-01 |
| rs157198   | 1 EPB41 | 0.12 Add | 1(0.81-1.23)    | 9.81E-01 | 9.81E-01 |
| rs10915216 | 1 EPB41 | 0.49 Rec | 0.87(0.7-1.09)  | 2.39E-01 | 9.83E-01 |
| rs553253   | 1 EPB41 | 0.43 Dom | 1.13(0.92-1.39) | 2.42E-01 | 9.84E-01 |
| rs4654388  | 1 EPB41 | 0.06 Dom | 1.04(0.78-1.4)  | 7.72E-01 | 9.84E-01 |
| rs12045054 | 1 EPB41 | 0.42 Rec | 0.86(0.67-1.11) | 2.54E-01 | 9.87E-01 |
| rs2503015  | 1 EPB41 | 0.42 Dom | 1.13(0.92-1.38) | 2.54E-01 | 9.87E-01 |
| rs2254241  | 1 EPB41 | 0.42 Dom | 1.13(0.92-1.38) | 2.54E-01 | 9.87E-01 |
| rs3003627  | 1 EPB41 | 0.42 Dom | 1.13(0.92-1.38) | 2.56E-01 | 9.87E-01 |
| rs12070152 | 1 EPB41 | 0.42 Dom | 1.12(0.92-1.38) | 2.62E-01 | 9.88E-01 |
| rs2486198  | 1 EPB41 | 0.42 Dom | 1.12(0.92-1.38) | 2.62E-01 | 9.88E-01 |
| rs7544914  | 1 EPB41 | 0.42 Dom | 1.13(0.92-1.38) | 2.57E-01 | 9.88E-01 |
| rs6703599  | 1 EPB41 | 0.42 Dom | 1.13(0.92-1.38) | 2.57E-01 | 9.88E-01 |
| rs2985335  | 1 EPB41 | 0.42 Dom | 1.12(0.91-1.38) | 2.73E-01 | 9.88E-01 |
| rs2985332  | 1 EPB41 | 0.42 Dom | 1.12(0.91-1.38) | 2.73E-01 | 9.88E-01 |
| rs2985330  | 1 EPB41 | 0.42 Dom | 1.12(0.91-1.38) | 2.73E-01 | 9.88E-01 |
| rs4654390  | 1 EPB41 | 0.49 Rec | 0.88(0.7-1.1)   | 2.60E-01 | 9.88E-01 |
| rs2249138  | 1 EPB41 | 0.43 Add | 1.07(0.93-1.23) | 3.26E-01 | 9.88E-01 |
| rs12021667 | 1 EPB41 | 0.08 Dom | 1.1(0.84-1.43)  | 4.97E-01 | 9.88E-01 |
| rs957633   | 1 EPB41 | 0.42 Rec | 0.88(0.68-1.14) | 3.36E-01 | 9.89E-01 |
| rs4275422  | 1 EPB41 | 0.42 Rec | 0.88(0.68-1.14) | 3.36E-01 | 9.89E-01 |
| rs12047323 | 1 EPB41 | 0.42 Rec | 0.88(0.68-1.14) | 3.36E-01 | 9.89E-01 |
| rs2985329  | 1 EPB41 | 0.42 Dom | 1.12(0.91-1.37) | 2.85E-01 | 9.90E-01 |
| rs2452788  | 1 EPB41 | 0.39 Dom | 1.11(0.91-1.36) | 2.91E-01 | 9.91E-01 |
| rs10915207 | 1 EPB41 | 0.20 Dom | 0.94(0.77-1.15) | 5.48E-01 | 9.92E-01 |
| rs12045750 | 1 EPB41 | 0.43 Rec | 0.89(0.69-1.15) | 3.68E-01 | 9.93E-01 |
| rs12038347 | 1 EPB41 | 0.42 Rec | 0.88(0.68-1.13) | 3.23E-01 | 9.94E-01 |
| rs550712   | 1 EPB41 | 0.42 Dom | 1.11(0.9-1.36)  | 3.25E-01 | 9.94E-01 |
| rs10429865 | 1 EPB41 | 0.08 Dom | 1.08(0.83-1.42) | 5.63E-01 | 9.95E-01 |
| rs12021646 | 1 EPB41 | 0.08 Dom | 1.08(0.83-1.42) | 5.63E-01 | 9.95E-01 |

|            |            |          |                 |          |          |
|------------|------------|----------|-----------------|----------|----------|
| rs12039988 | 1 EPB41    | 0.08 Dom | 1.05(0.8-1.37)  | 7.36E-01 | 9.95E-01 |
| rs12027267 | 1 EPB41    | 0.07 Add | 0.93(0.72-1.2)  | 5.90E-01 | 9.96E-01 |
| rs6702335  | 1 EPB41    | 0.08 Dom | 1.06(0.81-1.38) | 6.81E-01 | 9.97E-01 |
| rs4654381  | 1 EPB41    | 0.24 Dom | 1.08(0.89-1.31) | 4.45E-01 | 9.98E-01 |
| rs16837840 | 1 EPB41    | 0.42 Rec | 0.91(0.71-1.17) | 4.68E-01 | 9.98E-01 |
| rs157224   | 1 EPB41    | 0.12 Dom | 1(0.8-1.26)     | 9.79E-01 | 9.98E-01 |
| rs11581096 | 1 EPB41    | 0.24 Dom | 1.06(0.88-1.29) | 5.31E-01 | 9.98E-01 |
| rs6058427  | 20 EPB41L1 | 0.14 Rec | 0.53(0.23-1.23) | 1.42E-01 | 9.55E-01 |
| rs2179666  | 20 EPB41L1 | 0.14 Rec | 0.53(0.23-1.23) | 1.42E-01 | 9.55E-01 |
| rs2590947  | 20 EPB41L1 | 0.14 Rec | 0.53(0.23-1.23) | 1.42E-01 | 9.55E-01 |
| rs6058429  | 20 EPB41L1 | 0.14 Rec | 0.53(0.23-1.23) | 1.42E-01 | 9.55E-01 |
| rs6060840  | 20 EPB41L1 | 0.14 Rec | 0.53(0.23-1.23) | 1.42E-01 | 9.55E-01 |
| rs6121163  | 20 EPB41L1 | 0.14 Rec | 0.53(0.23-1.23) | 1.42E-01 | 9.55E-01 |
| rs1998147  | 20 EPB41L1 | 0.14 Rec | 0.53(0.23-1.23) | 1.42E-01 | 9.55E-01 |
| rs6060842  | 20 EPB41L1 | 0.14 Rec | 0.53(0.23-1.23) | 1.42E-01 | 9.55E-01 |
| rs6060820  | 20 EPB41L1 | 0.14 Rec | 0.53(0.23-1.23) | 1.42E-01 | 9.55E-01 |
| rs2281579  | 20 EPB41L1 | 0.14 Rec | 0.53(0.23-1.23) | 1.42E-01 | 9.55E-01 |
| rs6142512  | 20 EPB41L1 | 0.10 Dom | 0.99(0.78-1.27) | 9.60E-01 | 9.60E-01 |
| rs4142032  | 20 EPB41L1 | 0.14 Rec | 0.54(0.23-1.26) | 1.54E-01 | 9.66E-01 |
| rs6142508  | 20 EPB41L1 | 0.10 Rec | 0.95(0.39-2.29) | 9.07E-01 | 9.91E-01 |
| rs6121156  | 20 EPB41L1 | 0.14 Rec | 0.59(0.26-1.35) | 2.14E-01 | 9.93E-01 |
| rs6119695  | 20 EPB41L1 | 0.14 Rec | 0.6(0.26-1.38)  | 2.34E-01 | 9.96E-01 |
| rs2859715  | 20 EPB41L1 | 0.06 Dom | 0.88(0.65-1.19) | 3.93E-01 | 9.96E-01 |
| rs2590949  | 20 EPB41L1 | 0.24 Rec | 0.77(0.51-1.18) | 2.32E-01 | 9.96E-01 |
| rs752697   | 20 EPB41L1 | 0.24 Rec | 0.77(0.51-1.18) | 2.32E-01 | 9.96E-01 |
| rs6142509  | 20 EPB41L1 | 0.05 Add | 0.97(0.7-1.33)  | 8.40E-01 | 9.98E-01 |
| rs6141601  | 20 EPB41L1 | 0.05 Add | 0.97(0.72-1.3)  | 8.15E-01 | 9.99E-01 |
| rs2746103  | 20 EPB41L1 | 0.24 Rec | 0.81(0.53-1.23) | 3.15E-01 | 1.00E+00 |
| rs11700298 | 20 EPB41L1 | 0.27 Rec | 1.03(0.72-1.49) | 8.60E-01 | 1.00E+00 |
| rs6058435  | 20 EPB41L1 | 0.27 Rec | 1.03(0.72-1.49) | 8.60E-01 | 1.00E+00 |
| rs6060845  | 20 EPB41L1 | 0.19 Rec | 0.82(0.49-1.35) | 4.28E-01 | 1.00E+00 |
| rs2425188  | 20 EPB41L1 | 0.04 Add | 1.1(0.78-1.56)  | 5.89E-01 | 1.00E+00 |
| rs2752898  | 20 EPB41L1 | 0.24 Rec | 0.82(0.53-1.26) | 3.63E-01 | 1.00E+00 |
| rs2425191  | 20 EPB41L1 | 0.31 Rec | 1.09(0.78-1.51) | 6.09E-01 | 1.00E+00 |

|            |            |          |                 |          |          |
|------------|------------|----------|-----------------|----------|----------|
| rs2295568  | 20 EPB41L1 | 0.16 Rec | 0.75(0.39-1.45) | 3.91E-01 | 1.00E+00 |
| rs17093377 | 20 EPB41L1 | 0.14 Rec | 0.72(0.33-1.61) | 4.30E-01 | 1.00E+00 |
| rs2590991  | 20 EPB41L1 | 0.24 Rec | 0.84(0.55-1.27) | 4.01E-01 | 1.00E+00 |
| rs9789814  | 20 EPB41L1 | 0.07 Add | 1.07(0.81-1.4)  | 6.40E-01 | 1.00E+00 |
| rs6121179  | 20 EPB41L1 | 0.27 Add | 1.05(0.9-1.22)  | 5.23E-01 | 1.00E+00 |
| rs3813918  | 20 EPB41L1 | 0.27 Dom | 1.07(0.88-1.3)  | 4.84E-01 | 1.00E+00 |
| rs3850528  | 20 EPB41L1 | 0.10 Add | 0.98(0.78-1.22) | 8.33E-01 | 1.00E+00 |
| rs6060831  | 20 EPB41L1 | 0.02 Add | 0.87(0.54-1.42) | 5.89E-01 | 1.00E+00 |
| rs709050   | 20 EPB41L1 | 0.26 Dom | 1.05(0.87-1.27) | 6.21E-01 | 1.00E+00 |
| rs2247688  | 20 EPB41L1 | 0.26 Rec | 0.89(0.61-1.31) | 5.58E-01 | 1.00E+00 |
| rs2425185  | 20 EPB41L1 | 0.04 Add | 1.05(0.74-1.48) | 7.80E-01 | 1.00E+00 |
| rs6141600  | 20 EPB41L1 | 0.25 Rec | 0.88(0.58-1.32) | 5.32E-01 | 1.00E+00 |
| rs11700361 | 20 EPB41L1 | 0.27 Dom | 1.06(0.88-1.29) | 5.21E-01 | 1.00E+00 |
| rs1046383  | 20 EPB41L1 | 0.27 Dom | 1.06(0.88-1.29) | 5.21E-01 | 1.00E+00 |
| rs915171   | 6 EPB41L2  | 0.14 Add | 0.79(0.64-0.96) | 2.08E-02 | 6.64E-01 |
| rs928592   | 6 EPB41L2  | 0.14 Add | 0.8(0.65-0.98)  | 2.99E-02 | 7.75E-01 |
| rs10457563 | 6 EPB41L2  | 0.05 Dom | 0.74(0.53-1.02) | 6.71E-02 | 7.85E-01 |
| rs9402295  | 6 EPB41L2  | 0.05 Dom | 0.74(0.53-1.02) | 6.71E-02 | 7.86E-01 |
| rs10457562 | 6 EPB41L2  | 0.05 Dom | 0.74(0.53-1.02) | 6.71E-02 | 7.86E-01 |
| rs3777432  | 6 EPB41L2  | 0.05 Dom | 0.74(0.53-1.03) | 7.31E-02 | 8.09E-01 |
| rs10457561 | 6 EPB41L2  | 0.05 Dom | 0.75(0.55-1.04) | 8.70E-02 | 8.57E-01 |
| rs1043596  | 6 EPB41L2  | 0.28 Add | 0.86(0.74-1.01) | 6.23E-02 | 8.59E-01 |
| rs867707   | 6 EPB41L2  | 0.29 Add | 0.87(0.74-1.01) | 6.35E-02 | 8.63E-01 |
| rs9388860  | 6 EPB41L2  | 0.05 Dom | 0.76(0.55-1.05) | 9.16E-02 | 8.68E-01 |
| rs9385567  | 6 EPB41L2  | 0.05 Dom | 0.76(0.55-1.05) | 9.16E-02 | 8.69E-01 |
| rs9375778  | 6 EPB41L2  | 0.05 Dom | 0.76(0.55-1.05) | 9.16E-02 | 8.70E-01 |
| rs12194612 | 6 EPB41L2  | 0.26 Add | 0.87(0.74-1.02) | 9.06E-02 | 9.24E-01 |
| rs915172   | 6 EPB41L2  | 0.29 Rec | 0.71(0.49-1.02) | 6.71E-02 | 9.27E-01 |
| rs6931804  | 6 EPB41L2  | 0.09 Dom | 0.82(0.63-1.06) | 1.31E-01 | 9.64E-01 |
| rs13437326 | 6 EPB41L2  | 0.10 Dom | 0.83(0.65-1.07) | 1.55E-01 | 9.80E-01 |
| rs954211   | 6 EPB41L2  | 0.09 Dom | 0.83(0.64-1.08) | 1.61E-01 | 9.80E-01 |
| rs17831009 | 6 EPB41L2  | 0.17 Rec | 0.6(0.32-1.11)  | 1.05E-01 | 9.81E-01 |
| rs3734186  | 6 EPB41L2  | 0.38 Dom | 1.14(0.94-1.39) | 1.90E-01 | 9.82E-01 |
| rs17059736 | 6 EPB41L2  | 0.08 Add | 0.84(0.66-1.09) | 1.90E-01 | 9.88E-01 |

|            |           |          |                 |          |          |
|------------|-----------|----------|-----------------|----------|----------|
| rs17059678 | 6 EPB41L2 | 0.08 Add | 0.85(0.66-1.09) | 1.98E-01 | 9.91E-01 |
| rs17784418 | 6 EPB41L2 | 0.04 Add | 1(0.71-1.4)     | 9.91E-01 | 9.91E-01 |
| rs933063   | 6 EPB41L2 | 0.49 Add | 1.1(0.96-1.26)  | 1.68E-01 | 9.94E-01 |
| rs1811949  | 6 EPB41L2 | 0.09 Dom | 0.86(0.66-1.11) | 2.50E-01 | 9.95E-01 |
| rs6919007  | 6 EPB41L2 | 0.45 Add | 1.11(0.97-1.27) | 1.31E-01 | 9.95E-01 |
| rs9402291  | 6 EPB41L2 | 0.39 Add | 1.1(0.96-1.26)  | 1.85E-01 | 9.96E-01 |
| rs6922177  | 6 EPB41L2 | 0.10 Dom | 0.83(0.65-1.06) | 1.35E-01 | 9.96E-01 |
| rs2095961  | 6 EPB41L2 | 0.10 Dom | 0.83(0.65-1.06) | 1.35E-01 | 9.96E-01 |
| rs6941909  | 6 EPB41L2 | 0.08 Add | 0.86(0.66-1.11) | 2.35E-01 | 9.96E-01 |
| rs9492767  | 6 EPB41L2 | 0.21 Rec | 0.69(0.41-1.14) | 1.43E-01 | 9.96E-01 |
| rs6926250  | 6 EPB41L2 | 0.10 Dom | 0.85(0.66-1.1)  | 2.25E-01 | 9.96E-01 |
| rs6922045  | 6 EPB41L2 | 0.10 Dom | 0.85(0.66-1.1)  | 2.25E-01 | 9.96E-01 |
| rs6928920  | 6 EPB41L2 | 0.09 Add | 0.88(0.7-1.11)  | 2.70E-01 | 9.97E-01 |
| rs9372985  | 6 EPB41L2 | 0.10 Dom | 0.83(0.65-1.07) | 1.45E-01 | 9.97E-01 |
| rs9492776  | 6 EPB41L2 | 0.08 Add | 0.86(0.67-1.11) | 2.54E-01 | 9.98E-01 |
| rs9385564  | 6 EPB41L2 | 0.45 Add | 1.1(0.96-1.27)  | 1.51E-01 | 9.98E-01 |
| rs3777457  | 6 EPB41L2 | 0.24 Rec | 0.73(0.47-1.13) | 1.59E-01 | 9.98E-01 |
| rs9492782  | 6 EPB41L2 | 0.08 Add | 0.86(0.67-1.12) | 2.67E-01 | 9.98E-01 |
| rs3777434  | 6 EPB41L2 | 0.45 Rec | 1.14(0.9-1.44)  | 2.93E-01 | 9.98E-01 |
| rs2183967  | 6 EPB41L2 | 0.45 Rec | 1.14(0.9-1.44)  | 2.93E-01 | 9.98E-01 |
| rs3777435  | 6 EPB41L2 | 0.45 Add | 1.1(0.96-1.26)  | 1.61E-01 | 9.99E-01 |
| rs3777436  | 6 EPB41L2 | 0.45 Add | 1.1(0.96-1.26)  | 1.61E-01 | 9.99E-01 |
| rs7775013  | 6 EPB41L2 | 0.45 Add | 1.1(0.96-1.26)  | 1.70E-01 | 9.99E-01 |
| rs12965    | 6 EPB41L2 | 0.14 Rec | 0.59(0.28-1.27) | 1.80E-01 | 9.99E-01 |
| rs2327006  | 6 EPB41L2 | 0.08 Add | 0.87(0.67-1.12) | 2.83E-01 | 9.99E-01 |
| rs9492784  | 6 EPB41L2 | 0.08 Add | 0.87(0.67-1.12) | 2.83E-01 | 9.99E-01 |
| rs12527605 | 6 EPB41L2 | 0.08 Add | 0.87(0.67-1.12) | 2.83E-01 | 9.99E-01 |
| rs7747059  | 6 EPB41L2 | 0.08 Add | 0.87(0.67-1.12) | 2.83E-01 | 9.99E-01 |
| rs9388863  | 6 EPB41L2 | 0.45 Add | 1.1(0.96-1.26)  | 1.66E-01 | 9.99E-01 |
| rs11969461 | 6 EPB41L2 | 0.08 Add | 0.87(0.67-1.12) | 2.83E-01 | 9.99E-01 |
| rs12529894 | 6 EPB41L2 | 0.08 Add | 0.87(0.67-1.12) | 2.83E-01 | 9.99E-01 |
| rs6923182  | 6 EPB41L2 | 0.08 Add | 0.87(0.67-1.12) | 2.83E-01 | 9.99E-01 |
| rs12206057 | 6 EPB41L2 | 0.24 Rec | 0.73(0.47-1.14) | 1.72E-01 | 9.99E-01 |
| rs6938586  | 6 EPB41L2 | 0.24 Rec | 0.73(0.47-1.14) | 1.72E-01 | 9.99E-01 |

|            |           |          |                 |          |          |
|------------|-----------|----------|-----------------|----------|----------|
| rs17059681 | 6 EPB41L2 | 0.12 Rec | 0.52(0.2-1.36)  | 1.84E-01 | 9.99E-01 |
| rs9492785  | 6 EPB41L2 | 0.08 Add | 0.87(0.67-1.12) | 2.83E-01 | 9.99E-01 |
| rs12664355 | 6 EPB41L2 | 0.12 Rec | 0.52(0.2-1.36)  | 1.84E-01 | 9.99E-01 |
| rs2236078  | 6 EPB41L2 | 0.11 Rec | 0.49(0.17-1.41) | 1.87E-01 | 9.99E-01 |
| rs17059698 | 6 EPB41L2 | 0.12 Rec | 0.52(0.2-1.36)  | 1.84E-01 | 9.99E-01 |
| rs1043598  | 6 EPB41L2 | 0.12 Rec | 0.52(0.2-1.36)  | 1.84E-01 | 9.99E-01 |
| rs10499174 | 6 EPB41L2 | 0.12 Rec | 0.52(0.2-1.36)  | 1.84E-01 | 9.99E-01 |
| rs17059702 | 6 EPB41L2 | 0.12 Rec | 0.52(0.2-1.36)  | 1.84E-01 | 9.99E-01 |
| rs17059683 | 6 EPB41L2 | 0.12 Rec | 0.52(0.2-1.36)  | 1.84E-01 | 9.99E-01 |
| rs9402310  | 6 EPB41L2 | 0.42 Rec | 1.18(0.93-1.5)  | 1.75E-01 | 9.99E-01 |
| rs6916206  | 6 EPB41L2 | 0.42 Rec | 1.18(0.93-1.5)  | 1.75E-01 | 9.99E-01 |
| rs9375794  | 6 EPB41L2 | 0.42 Rec | 1.18(0.93-1.5)  | 1.75E-01 | 9.99E-01 |
| rs9492774  | 6 EPB41L2 | 0.32 Add | 1(0.86-1.16)    | 9.68E-01 | 9.99E-01 |
| rs9375790  | 6 EPB41L2 | 0.42 Rec | 1.18(0.93-1.5)  | 1.75E-01 | 9.99E-01 |
| rs6905151  | 6 EPB41L2 | 0.42 Rec | 1.18(0.93-1.5)  | 1.75E-01 | 9.99E-01 |
| rs9375789  | 6 EPB41L2 | 0.43 Rec | 1.18(0.93-1.5)  | 1.75E-01 | 9.99E-01 |
| rs9402306  | 6 EPB41L2 | 0.43 Rec | 1.18(0.93-1.5)  | 1.75E-01 | 9.99E-01 |
| rs9388873  | 6 EPB41L2 | 0.42 Rec | 1.18(0.93-1.5)  | 1.75E-01 | 9.99E-01 |
| rs9398967  | 6 EPB41L2 | 0.43 Rec | 1.18(0.93-1.5)  | 1.75E-01 | 9.99E-01 |
| rs11760051 | 6 EPB41L2 | 0.43 Rec | 1.18(0.93-1.5)  | 1.75E-01 | 9.99E-01 |
| rs17180687 | 6 EPB41L2 | 0.09 Dom | 0.87(0.67-1.13) | 2.90E-01 | 9.99E-01 |
| rs6569708  | 6 EPB41L2 | 0.47 Dom | 1.11(0.9-1.37)  | 3.44E-01 | 9.99E-01 |
| rs9388861  | 6 EPB41L2 | 0.47 Dom | 1.11(0.9-1.37)  | 3.44E-01 | 9.99E-01 |
| rs7760965  | 6 EPB41L2 | 0.47 Rec | 1.12(0.89-1.4)  | 3.42E-01 | 9.99E-01 |
| rs6569707  | 6 EPB41L2 | 0.47 Dom | 1.11(0.89-1.37) | 3.52E-01 | 9.99E-01 |
| rs1332492  | 6 EPB41L2 | 0.07 Add | 0.88(0.67-1.15) | 3.41E-01 | 1.00E+00 |
| rs9402292  | 6 EPB41L2 | 0.48 Add | 1.09(0.95-1.25) | 2.05E-01 | 1.00E+00 |
| rs4897468  | 6 EPB41L2 | 0.48 Dom | 1.1(0.89-1.37)  | 3.70E-01 | 1.00E+00 |
| rs12110524 | 6 EPB41L2 | 0.23 Rec | 0.75(0.48-1.19) | 2.23E-01 | 1.00E+00 |
| rs1855078  | 6 EPB41L2 | 0.07 Add | 0.88(0.67-1.16) | 3.68E-01 | 1.00E+00 |
| rs12528626 | 6 EPB41L2 | 0.08 Add | 0.89(0.69-1.15) | 3.71E-01 | 1.00E+00 |
| rs9375785  | 6 EPB41L2 | 0.43 Add | 1.07(0.94-1.22) | 3.16E-01 | 1.00E+00 |
| rs3777438  | 6 EPB41L2 | 0.20 Add | 0.92(0.78-1.09) | 3.58E-01 | 1.00E+00 |
| rs10499177 | 6 EPB41L2 | 0.08 Add | 0.9(0.7-1.15)   | 4.01E-01 | 1.00E+00 |



|            |           |          |                 |          |          |
|------------|-----------|----------|-----------------|----------|----------|
| rs9492762  | 6 EPB41L2 | 0.10 Add | 0.88(0.7-1.11)  | 2.75E-01 | 1.00E+00 |
| rs17059851 | 6 EPB41L2 | 0.26 Rec | 1.01(0.7-1.45)  | 9.68E-01 | 1.00E+00 |
| rs942      | 6 EPB41L2 | 0.09 Add | 0.92(0.72-1.16) | 4.77E-01 | 1.00E+00 |
| rs9375791  | 6 EPB41L2 | 0.22 Dom | 0.93(0.77-1.13) | 4.85E-01 | 1.00E+00 |
| rs2297853  | 6 EPB41L2 | 0.07 Add | 0.9(0.69-1.18)  | 4.48E-01 | 1.00E+00 |
| rs9483206  | 6 EPB41L2 | 0.08 Dom | 0.91(0.69-1.2)  | 5.06E-01 | 1.00E+00 |
| rs1413755  | 6 EPB41L2 | 0.07 Add | 0.9(0.68-1.18)  | 4.53E-01 | 1.00E+00 |
| rs2281487  | 6 EPB41L2 | 0.10 Dom | 0.88(0.68-1.12) | 2.93E-01 | 1.00E+00 |
| rs2236075  | 6 EPB41L2 | 0.36 Rec | 1.04(0.78-1.39) | 7.83E-01 | 1.00E+00 |
| rs12202038 | 6 EPB41L2 | 0.36 Rec | 1.04(0.78-1.39) | 7.83E-01 | 1.00E+00 |
| rs7752292  | 6 EPB41L2 | 0.50 Dom | 0.89(0.72-1.11) | 3.11E-01 | 1.00E+00 |
| rs17059896 | 6 EPB41L2 | 0.12 Rec | 0.67(0.29-1.55) | 3.46E-01 | 1.00E+00 |
| rs4897473  | 6 EPB41L2 | 0.06 Add | 0.91(0.69-1.2)  | 5.12E-01 | 1.00E+00 |
| rs12199765 | 6 EPB41L2 | 0.47 Rec | 0.96(0.77-1.22) | 7.61E-01 | 1.00E+00 |
| rs9492775  | 6 EPB41L2 | 0.21 Rec | 0.8(0.5-1.29)   | 3.61E-01 | 1.00E+00 |
| rs9321265  | 6 EPB41L2 | 0.21 Rec | 0.8(0.5-1.29)   | 3.61E-01 | 1.00E+00 |
| rs2281490  | 6 EPB41L2 | 0.34 Rec | 1.01(0.75-1.36) | 9.38E-01 | 1.00E+00 |
| rs7765757  | 6 EPB41L2 | 0.13 Rec | 0.69(0.3-1.56)  | 3.74E-01 | 1.00E+00 |
| rs9372988  | 6 EPB41L2 | 0.13 Rec | 0.69(0.3-1.56)  | 3.74E-01 | 1.00E+00 |
| rs6569720  | 6 EPB41L2 | 0.13 Rec | 0.69(0.3-1.56)  | 3.74E-01 | 1.00E+00 |
| rs6569718  | 6 EPB41L2 | 0.12 Rec | 0.68(0.29-1.6)  | 3.78E-01 | 1.00E+00 |
| rs1332491  | 6 EPB41L2 | 0.12 Rec | 0.68(0.29-1.6)  | 3.78E-01 | 1.00E+00 |
| rs1338905  | 6 EPB41L2 | 0.12 Rec | 0.68(0.29-1.6)  | 3.78E-01 | 1.00E+00 |
| rs2007339  | 6 EPB41L2 | 0.12 Rec | 0.68(0.29-1.6)  | 3.78E-01 | 1.00E+00 |
| rs6900810  | 6 EPB41L2 | 0.12 Rec | 0.68(0.29-1.6)  | 3.78E-01 | 1.00E+00 |
| rs2151069  | 6 EPB41L2 | 0.12 Rec | 0.68(0.29-1.6)  | 3.78E-01 | 1.00E+00 |
| rs13193246 | 6 EPB41L2 | 0.12 Rec | 0.68(0.29-1.6)  | 3.78E-01 | 1.00E+00 |
| rs6906478  | 6 EPB41L2 | 0.05 Dom | 0.92(0.67-1.26) | 5.86E-01 | 1.00E+00 |
| rs4897485  | 6 EPB41L2 | 0.04 Add | 0.91(0.64-1.29) | 6.09E-01 | 1.00E+00 |
| rs9321260  | 6 EPB41L2 | 0.47 Rec | 0.96(0.77-1.21) | 7.43E-01 | 1.00E+00 |
| rs4357159  | 6 EPB41L2 | 0.47 Rec | 0.96(0.77-1.21) | 7.43E-01 | 1.00E+00 |
| rs28482889 | 6 EPB41L2 | 0.05 Add | 0.92(0.67-1.28) | 6.35E-01 | 1.00E+00 |
| rs17785507 | 6 EPB41L2 | 0.04 Add | 0.92(0.65-1.3)  | 6.43E-01 | 1.00E+00 |
| rs17770255 | 6 EPB41L2 | 0.04 Add | 0.92(0.64-1.32) | 6.50E-01 | 1.00E+00 |

|            |           |          |                 |          |          |
|------------|-----------|----------|-----------------|----------|----------|
| rs3777466  | 6 EPB41L2 | 0.50 Add | 1.05(0.92-1.2)  | 5.06E-01 | 1.00E+00 |
| rs7747881  | 6 EPB41L2 | 0.13 Rec | 0.73(0.33-1.59) | 4.24E-01 | 1.00E+00 |
| rs6918160  | 6 EPB41L2 | 0.06 Add | 0.94(0.69-1.26) | 6.57E-01 | 1.00E+00 |
| rs1413754  | 6 EPB41L2 | 0.36 Rec | 0.95(0.71-1.28) | 7.37E-01 | 1.00E+00 |
| rs3777461  | 6 EPB41L2 | 0.50 Rec | 0.91(0.73-1.14) | 4.30E-01 | 1.00E+00 |
| rs12195366 | 6 EPB41L2 | 0.47 Add | 1.05(0.92-1.2)  | 5.11E-01 | 1.00E+00 |
| rs12196734 | 6 EPB41L2 | 0.47 Add | 1.05(0.92-1.2)  | 5.11E-01 | 1.00E+00 |
| rs7769153  | 6 EPB41L2 | 0.13 Rec | 0.72(0.32-1.62) | 4.30E-01 | 1.00E+00 |
| rs9321263  | 6 EPB41L2 | 0.05 Dom | 0.93(0.68-1.28) | 6.62E-01 | 1.00E+00 |
| rs9375787  | 6 EPB41L2 | 0.48 Add | 1.04(0.91-1.2)  | 5.21E-01 | 1.00E+00 |
| rs9375788  | 6 EPB41L2 | 0.48 Add | 1.04(0.91-1.2)  | 5.21E-01 | 1.00E+00 |
| rs6938552  | 6 EPB41L2 | 0.04 Add | 0.93(0.64-1.34) | 6.81E-01 | 1.00E+00 |
| rs3777450  | 6 EPB41L2 | 0.12 Rec | 0.73(0.32-1.65) | 4.46E-01 | 1.00E+00 |
| rs3777453  | 6 EPB41L2 | 0.12 Rec | 0.73(0.32-1.65) | 4.46E-01 | 1.00E+00 |
| rs4895908  | 6 EPB41L2 | 0.03 Add | 0.93(0.64-1.35) | 7.00E-01 | 1.00E+00 |
| rs17059853 | 6 EPB41L2 | 0.26 Rec | 1.02(0.71-1.47) | 9.09E-01 | 1.00E+00 |
| rs1999473  | 6 EPB41L2 | 0.27 Rec | 1.02(0.71-1.47) | 9.09E-01 | 1.00E+00 |
| rs3822865  | 6 EPB41L2 | 0.26 Rec | 1.02(0.71-1.47) | 9.09E-01 | 1.00E+00 |
| rs17059909 | 6 EPB41L2 | 0.27 Rec | 1.02(0.71-1.47) | 9.09E-01 | 1.00E+00 |
| rs6921207  | 6 EPB41L2 | 0.45 Rec | 1.01(0.79-1.29) | 9.28E-01 | 1.00E+00 |
| rs2236081  | 6 EPB41L2 | 0.36 Rec | 0.98(0.74-1.3)  | 8.99E-01 | 1.00E+00 |
| rs17059938 | 6 EPB41L2 | 0.27 Add | 1.02(0.88-1.19) | 7.60E-01 | 1.00E+00 |
| rs6928986  | 6 EPB41L2 | 0.39 Dom | 1.01(0.83-1.24) | 8.96E-01 | 1.00E+00 |
| rs3822859  | 6 EPB41L2 | 0.26 Dom | 1.04(0.85-1.26) | 7.22E-01 | 1.00E+00 |
| rs4895907  | 6 EPB41L2 | 0.03 Add | 0.94(0.64-1.37) | 7.28E-01 | 1.00E+00 |
| rs9385568  | 6 EPB41L2 | 0.04 Add | 0.98(0.7-1.37)  | 8.96E-01 | 1.00E+00 |
| rs7769678  | 6 EPB41L2 | 0.04 Add | 0.98(0.7-1.37)  | 8.96E-01 | 1.00E+00 |
| rs3777451  | 6 EPB41L2 | 0.26 Rec | 1.06(0.75-1.52) | 7.30E-01 | 1.00E+00 |
| rs1413753  | 6 EPB41L2 | 0.27 Rec | 0.94(0.66-1.35) | 7.34E-01 | 1.00E+00 |
| rs4895903  | 6 EPB41L2 | 0.04 Add | 0.94(0.67-1.33) | 7.33E-01 | 1.00E+00 |
| rs6935108  | 6 EPB41L2 | 0.04 Add | 0.98(0.69-1.38) | 8.92E-01 | 1.00E+00 |
| rs10499181 | 6 EPB41L2 | 0.27 Rec | 1.03(0.71-1.47) | 8.88E-01 | 1.00E+00 |
| rs17059968 | 6 EPB41L2 | 0.27 Rec | 1.03(0.71-1.47) | 8.88E-01 | 1.00E+00 |
| rs12661081 | 6 EPB41L2 | 0.13 Rec | 0.78(0.38-1.6)  | 4.98E-01 | 1.00E+00 |

|            |           |          |                 |          |          |
|------------|-----------|----------|-----------------|----------|----------|
| rs3777458  | 6 EPB41L2 | 0.47 Rec | 0.95(0.76-1.2)  | 6.75E-01 | 1.00E+00 |
| rs4895901  | 6 EPB41L2 | 0.05 Add | 0.95(0.68-1.32) | 7.51E-01 | 1.00E+00 |
| rs7741148  | 6 EPB41L2 | 0.05 Add | 0.95(0.68-1.32) | 7.51E-01 | 1.00E+00 |
| rs17059760 | 6 EPB41L2 | 0.26 Rec | 1.05(0.73-1.51) | 7.72E-01 | 1.00E+00 |
| rs3777447  | 6 EPB41L2 | 0.26 Rec | 1.05(0.73-1.51) | 7.72E-01 | 1.00E+00 |
| rs17059799 | 6 EPB41L2 | 0.26 Rec | 1.05(0.73-1.51) | 7.72E-01 | 1.00E+00 |
| rs17059801 | 6 EPB41L2 | 0.26 Rec | 1.05(0.73-1.51) | 7.72E-01 | 1.00E+00 |
| rs3777448  | 6 EPB41L2 | 0.26 Rec | 1.05(0.73-1.51) | 7.72E-01 | 1.00E+00 |
| rs17059787 | 6 EPB41L2 | 0.26 Rec | 1.05(0.73-1.51) | 7.72E-01 | 1.00E+00 |
| rs10499178 | 6 EPB41L2 | 0.27 Dom | 1.01(0.84-1.23) | 8.79E-01 | 1.00E+00 |
| rs2275064  | 6 EPB41L2 | 0.26 Rec | 1.05(0.73-1.51) | 7.72E-01 | 1.00E+00 |
| rs3777455  | 6 EPB41L2 | 0.50 Add | 0.97(0.84-1.1)  | 6.13E-01 | 1.00E+00 |
| rs3798249  | 6 EPB41L2 | 0.50 Add | 0.97(0.84-1.1)  | 6.12E-01 | 1.00E+00 |
| rs6921396  | 6 EPB41L2 | 0.04 Add | 0.94(0.65-1.37) | 7.64E-01 | 1.00E+00 |
| rs4897472  | 6 EPB41L2 | 0.50 Rec | 0.93(0.75-1.16) | 5.30E-01 | 1.00E+00 |
| rs4897471  | 6 EPB41L2 | 0.50 Rec | 0.93(0.75-1.16) | 5.30E-01 | 1.00E+00 |
| rs2068147  | 6 EPB41L2 | 0.50 Rec | 0.93(0.75-1.16) | 5.30E-01 | 1.00E+00 |
| rs2839942  | 6 EPB41L2 | 0.27 Rec | 1.06(0.74-1.51) | 7.61E-01 | 1.00E+00 |
| rs6975     | 6 EPB41L2 | 0.48 Dom | 0.98(0.79-1.22) | 8.86E-01 | 1.00E+00 |
| rs12193574 | 6 EPB41L2 | 0.50 Rec | 0.93(0.75-1.16) | 5.25E-01 | 1.00E+00 |
| rs17059925 | 6 EPB41L2 | 0.13 Rec | 0.9(0.44-1.84)  | 7.81E-01 | 1.00E+00 |
| rs3777463  | 6 EPB41L2 | 0.12 Rec | 0.77(0.34-1.74) | 5.26E-01 | 1.00E+00 |
| rs12197829 | 6 EPB41L2 | 0.48 Dom | 1.07(0.86-1.32) | 5.47E-01 | 1.00E+00 |
| rs3822864  | 6 EPB41L2 | 0.12 Rec | 0.77(0.34-1.74) | 5.26E-01 | 1.00E+00 |
| rs3777433  | 6 EPB41L2 | 0.26 Dom | 1.05(0.86-1.27) | 6.51E-01 | 1.00E+00 |
| rs17059739 | 6 EPB41L2 | 0.26 Rec | 1.04(0.72-1.49) | 8.49E-01 | 1.00E+00 |
| rs3777456  | 6 EPB41L2 | 0.26 Rec | 1.05(0.73-1.5)  | 7.86E-01 | 1.00E+00 |
| rs12530288 | 6 EPB41L2 | 0.47 Dom | 0.97(0.79-1.2)  | 7.88E-01 | 1.00E+00 |
| rs6941712  | 6 EPB41L2 | 0.47 Dom | 0.97(0.79-1.2)  | 7.88E-01 | 1.00E+00 |
| rs12526896 | 6 EPB41L2 | 0.47 Dom | 0.97(0.79-1.2)  | 7.88E-01 | 1.00E+00 |
| rs3777464  | 6 EPB41L2 | 0.35 Add | 0.97(0.84-1.12) | 6.66E-01 | 1.00E+00 |
| rs872576   | 6 EPB41L2 | 0.06 Add | 0.95(0.72-1.26) | 7.41E-01 | 1.00E+00 |
| rs3777442  | 6 EPB41L2 | 0.50 Add | 0.97(0.85-1.11) | 6.53E-01 | 1.00E+00 |
| rs3798250  | 6 EPB41L2 | 0.50 Add | 0.97(0.85-1.11) | 6.53E-01 | 1.00E+00 |

|            |           |          |                 |          |          |
|------------|-----------|----------|-----------------|----------|----------|
| rs3777441  | 6 EPB41L2 | 0.50 Add | 0.97(0.85-1.11) | 6.53E-01 | 1.00E+00 |
| rs17059963 | 6 EPB41L2 | 0.26 Rec | 0.96(0.66-1.4)  | 8.49E-01 | 1.00E+00 |
| rs3822860  | 6 EPB41L2 | 0.26 Rec | 1.04(0.73-1.49) | 8.24E-01 | 1.00E+00 |
| rs10499176 | 6 EPB41L2 | 0.26 Add | 1.04(0.89-1.2)  | 6.56E-01 | 1.00E+00 |
| rs17059669 | 6 EPB41L2 | 0.27 Dom | 1.05(0.87-1.28) | 6.01E-01 | 1.00E+00 |
| rs4897484  | 6 EPB41L2 | 0.04 Add | 0.97(0.69-1.37) | 8.67E-01 | 1.00E+00 |
| rs2275063  | 6 EPB41L2 | 0.14 Dom | 0.98(0.79-1.22) | 8.74E-01 | 1.00E+00 |
| rs714709   | 6 EPB41L2 | 0.27 Dom | 1.05(0.87-1.28) | 5.99E-01 | 1.00E+00 |
| rs6569716  | 6 EPB41L2 | 0.13 Add | 1.02(0.84-1.25) | 8.23E-01 | 1.00E+00 |
| rs4142581  | 6 EPB41L2 | 0.27 Rec | 1.03(0.72-1.48) | 8.66E-01 | 1.00E+00 |
| rs9492755  | 6 EPB41L2 | 0.47 Rec | 0.95(0.75-1.19) | 6.37E-01 | 1.00E+00 |
| rs933064   | 6 EPB41L2 | 0.38 Add | 1.03(0.9-1.18)  | 6.69E-01 | 1.00E+00 |
| rs17059808 | 6 EPB41L2 | 0.26 Rec | 1.04(0.72-1.49) | 8.44E-01 | 1.00E+00 |
| rs17059810 | 6 EPB41L2 | 0.26 Rec | 1.04(0.72-1.49) | 8.44E-01 | 1.00E+00 |
| rs10499175 | 6 EPB41L2 | 0.27 Rec | 1.03(0.72-1.48) | 8.70E-01 | 1.00E+00 |
| rs17059735 | 6 EPB41L2 | 0.26 Rec | 1.03(0.72-1.48) | 8.70E-01 | 1.00E+00 |
| rs17059726 | 6 EPB41L2 | 0.26 Rec | 1.03(0.72-1.48) | 8.70E-01 | 1.00E+00 |
| rs7765007  | 6 EPB41L2 | 0.13 Rec | 0.92(0.45-1.89) | 8.30E-01 | 1.00E+00 |
| rs4895902  | 6 EPB41L2 | 0.14 Add | 1.02(0.84-1.24) | 8.62E-01 | 1.00E+00 |
| rs6509214  | 19 FOSB   | 0.50 Add | 0.82(0.72-0.94) | 5.45E-03 | 5.51E-02 |
| rs1603     | 19 FOSB   | 0.28 Dom | 1.33(1.1-1.61)  | 3.83E-03 | 6.21E-02 |
| rs7245548  | 19 FOSB   | 0.50 Add | 0.83(0.72-0.95) | 6.20E-03 | 6.22E-02 |
| rs7250901  | 19 FOSB   | 0.50 Add | 0.83(0.72-0.95) | 6.80E-03 | 6.68E-02 |
| rs2238687  | 19 FOSB   | 0.41 Rec | 0.69(0.53-0.91) | 8.34E-03 | 9.08E-02 |
| rs12373539 | 19 FOSB   | 0.41 Rec | 0.69(0.53-0.91) | 8.34E-03 | 9.10E-02 |
| rs2238686  | 19 FOSB   | 0.41 Rec | 0.69(0.53-0.91) | 8.34E-03 | 9.10E-02 |
| rs2276470  | 19 FOSB   | 0.41 Dom | 1.28(1.04-1.57) | 1.88E-02 | 1.55E-01 |
| rs2276469  | 19 FOSB   | 0.41 Add | 1.19(1.03-1.37) | 1.82E-02 | 1.61E-01 |
| rs10402243 | 19 FOSB   | 0.40 Add | 0.88(0.77-1.01) | 7.06E-02 | 4.21E-01 |
| rs3760846  | 19 FOSB   | 0.22 Add | 0.87(0.74-1.03) | 1.17E-01 | 4.69E-01 |
| rs10415949 | 19 FOSB   | 0.40 Add | 0.89(0.77-1.02) | 8.35E-02 | 4.71E-01 |
| rs4511641  | 19 FOSB   | 0.22 Dom | 1.15(0.95-1.4)  | 1.48E-01 | 4.82E-01 |
| rs10423854 | 19 FOSB   | 0.28 Rec | 0.95(0.68-1.35) | 7.89E-01 | 7.89E-01 |
| rs2277200  | 9 FREQ    | 0.15 Rec | 2.05(1.07-3.93) | 3.08E-02 | 8.51E-01 |

|            |   |      |      |     |                 |          |          |
|------------|---|------|------|-----|-----------------|----------|----------|
| rs2900286  | 9 | FREQ | 0.15 | Rec | 2.05(1.07-3.93) | 3.08E-02 | 8.51E-01 |
| rs7873936  | 9 | FREQ | 0.11 | Rec | 2.56(1.03-6.36) | 4.36E-02 | 9.30E-01 |
| rs3829905  | 9 | FREQ | 0.15 | Rec | 1.93(0.99-3.78) | 5.33E-02 | 9.53E-01 |
| rs10819615 | 9 | FREQ | 0.09 | Add | 0.99(0.78-1.25) | 9.01E-01 | 9.56E-01 |
| rs917690   | 9 | FREQ | 0.16 | Rec | 1.73(0.99-3.02) | 5.50E-02 | 9.57E-01 |
| rs10819609 | 9 | FREQ | 0.39 | Dom | 0.84(0.69-1.02) | 7.89E-02 | 9.83E-01 |
| rs4837480  | 9 | FREQ | 0.39 | Dom | 0.84(0.69-1.02) | 7.89E-02 | 9.83E-01 |
| rs3780707  | 9 | FREQ | 0.39 | Dom | 0.84(0.69-1.02) | 7.92E-02 | 9.83E-01 |
| rs13288372 | 9 | FREQ | 0.13 | Rec | 1.97(0.92-4.22) | 8.08E-02 | 9.87E-01 |
| rs11552451 | 9 | FREQ | 0.11 | Dom | 1.18(0.94-1.49) | 1.57E-01 | 9.91E-01 |
| rs947513   | 9 | FREQ | 0.15 | Dom | 0.83(0.67-1.04) | 9.87E-02 | 9.92E-01 |
| rs7023210  | 9 | FREQ | 0.15 | Dom | 0.83(0.67-1.04) | 1.00E-01 | 9.92E-01 |
| rs10819611 | 9 | FREQ | 0.13 | Rec | 1.91(0.9-4.05)  | 9.32E-02 | 9.92E-01 |
| rs3780710  | 9 | FREQ | 0.39 | Dom | 0.85(0.69-1.03) | 9.98E-02 | 9.93E-01 |
| rs3780711  | 9 | FREQ | 0.40 | Dom | 0.85(0.7-1.04)  | 1.18E-01 | 9.97E-01 |
| rs12003792 | 9 | FREQ | 0.09 | Dom | 0.98(0.76-1.26) | 8.89E-01 | 9.97E-01 |
| rs887534   | 9 | FREQ | 0.04 | Add | 0.81(0.56-1.19) | 2.86E-01 | 9.99E-01 |
| rs7022964  | 9 | FREQ | 0.04 | Add | 0.81(0.56-1.19) | 2.86E-01 | 9.99E-01 |
| rs12346070 | 9 | FREQ | 0.10 | Dom | 0.84(0.66-1.07) | 1.61E-01 | 1.00E+00 |
| rs4836697  | 9 | FREQ | 0.10 | Dom | 0.84(0.66-1.07) | 1.65E-01 | 1.00E+00 |
| rs13287767 | 9 | FREQ | 0.03 | Dom | 0.93(0.63-1.38) | 7.24E-01 | 1.00E+00 |
| rs4837479  | 9 | FREQ | 0.32 | Dom | 0.88(0.72-1.06) | 1.84E-01 | 1.00E+00 |
| rs3897499  | 9 | FREQ | 0.11 | Rec | 1.65(0.81-3.36) | 1.68E-01 | 1.00E+00 |
| rs4836695  | 9 | FREQ | 0.10 | Dom | 0.85(0.66-1.08) | 1.83E-01 | 1.00E+00 |
| rs4240447  | 9 | FREQ | 0.10 | Dom | 0.85(0.66-1.08) | 1.83E-01 | 1.00E+00 |
| rs10988653 | 9 | FREQ | 0.06 | Dom | 0.98(0.73-1.31) | 8.89E-01 | 1.00E+00 |
| rs10988625 | 9 | FREQ | 0.43 | Dom | 0.87(0.71-1.07) | 1.85E-01 | 1.00E+00 |
| rs3824544  | 9 | FREQ | 0.09 | Dom | 0.95(0.74-1.22) | 6.97E-01 | 1.00E+00 |
| rs3780709  | 9 | FREQ | 0.09 | Dom | 0.88(0.68-1.13) | 3.18E-01 | 1.00E+00 |
| rs3780712  | 9 | FREQ | 0.32 | Rec | 0.86(0.62-1.2)  | 3.71E-01 | 1.00E+00 |
| rs1342043  | 9 | FREQ | 0.05 | Dom | 0.89(0.64-1.24) | 4.98E-01 | 1.00E+00 |
| rs10988645 | 9 | FREQ | 0.10 | Dom | 0.86(0.67-1.09) | 2.14E-01 | 1.00E+00 |
| rs7037293  | 9 | FREQ | 0.04 | Dom | 0.89(0.63-1.27) | 5.26E-01 | 1.00E+00 |
| rs7868148  | 9 | FREQ | 0.29 | Dom | 1.07(0.88-1.3)  | 4.91E-01 | 1.00E+00 |

|            |    |      |      |     |                 |          |          |
|------------|----|------|------|-----|-----------------|----------|----------|
| rs3780715  | 9  | FREQ | 0.13 | Rec | 1.47(0.73-2.98) | 2.82E-01 | 1.00E+00 |
| rs4240446  | 9  | FREQ | 0.04 | Dom | 0.89(0.63-1.27) | 5.29E-01 | 1.00E+00 |
| rs3780708  | 9  | FREQ | 0.22 | Add | 0.93(0.79-1.1)  | 4.13E-01 | 1.00E+00 |
| rs870811   | 9  | FREQ | 0.14 | Dom | 0.87(0.7-1.09)  | 2.25E-01 | 1.00E+00 |
| rs7856531  | 9  | FREQ | 0.14 | Rec | 1.55(0.78-3.1)  | 2.12E-01 | 1.00E+00 |
| rs7867364  | 9  | FREQ | 0.03 | Dom | 1.19(0.8-1.78)  | 3.85E-01 | 1.00E+00 |
| rs7024495  | 9  | FREQ | 0.13 | Dom | 0.91(0.73-1.14) | 4.17E-01 | 1.00E+00 |
| rs10819610 | 9  | FREQ | 0.15 | Rec | 1.45(0.72-2.93) | 3.00E-01 | 1.00E+00 |
| rs3824542  | 9  | FREQ | 0.32 | Add | 0.92(0.79-1.07) | 2.63E-01 | 1.00E+00 |
| rs7045735  | 9  | FREQ | 0.14 | Add | 0.94(0.77-1.15) | 5.56E-01 | 1.00E+00 |
| rs4424362  | 9  | FREQ | 0.15 | Rec | 1.47(0.74-2.91) | 2.67E-01 | 1.00E+00 |
| rs7862394  | 9  | FREQ | 0.15 | Rec | 1.47(0.74-2.91) | 2.67E-01 | 1.00E+00 |
| rs7852859  | 9  | FREQ | 0.08 | Dom | 0.88(0.67-1.15) | 3.58E-01 | 1.00E+00 |
| rs740918   | 9  | FREQ | 0.10 | Dom | 0.95(0.74-1.21) | 6.73E-01 | 1.00E+00 |
| rs11789529 | 9  | FREQ | 0.16 | Rec | 0.78(0.41-1.51) | 4.69E-01 | 1.00E+00 |
| rs9802616  | 9  | FREQ | 0.06 | Add | 0.88(0.65-1.2)  | 4.16E-01 | 1.00E+00 |
| rs1054879  | 9  | FREQ | 0.19 | Dom | 1.12(0.91-1.37) | 2.83E-01 | 1.00E+00 |
| rs7847694  | 9  | FREQ | 0.26 | Rec | 0.78(0.52-1.19) | 2.54E-01 | 1.00E+00 |
| rs1009502  | 9  | FREQ | 0.10 | Rec | 1.82(0.68-4.91) | 2.33E-01 | 1.00E+00 |
| rs1017112  | 9  | FREQ | 0.28 | Add | 0.95(0.82-1.11) | 5.40E-01 | 1.00E+00 |
| rs12378342 | 9  | FREQ | 0.04 | Add | 1.02(0.73-1.43) | 9.03E-01 | 1.00E+00 |
| rs7863731  | 9  | FREQ | 0.29 | Dom | 1.09(0.9-1.32)  | 3.89E-01 | 1.00E+00 |
| rs1557123  | 9  | FREQ | 0.22 | Dom | 1.07(0.88-1.3)  | 4.86E-01 | 1.00E+00 |
| rs868964   | 9  | FREQ | 0.04 | Dom | 0.91(0.64-1.29) | 6.02E-01 | 1.00E+00 |
| rs13710    | 9  | FREQ | 0.21 | Add | 1.06(0.9-1.25)  | 4.77E-01 | 1.00E+00 |
| rs12376641 | 9  | FREQ | 0.03 | Add | 1.08(0.73-1.59) | 7.01E-01 | 1.00E+00 |
| rs709611   | 9  | FREQ | 0.21 | Dom | 1.07(0.88-1.31) | 4.76E-01 | 1.00E+00 |
| rs7849345  | 9  | FREQ | 0.16 | Add | 0.96(0.8-1.16)  | 6.73E-01 | 1.00E+00 |
| rs3780714  | 9  | FREQ | 0.06 | Dom | 0.98(0.72-1.33) | 8.81E-01 | 1.00E+00 |
| rs6026592  | 20 | GNAS | 0.30 | Add | 1.25(1.08-1.45) | 2.59E-03 | 1.34E-01 |
| rs6128461  | 20 | GNAS | 0.30 | Add | 1.25(1.08-1.45) | 2.89E-03 | 1.47E-01 |
| rs8121252  | 20 | GNAS | 0.27 | Add | 1.25(1.08-1.45) | 3.59E-03 | 1.74E-01 |
| rs13831    | 20 | GNAS | 0.27 | Add | 1.25(1.07-1.45) | 3.85E-03 | 1.83E-01 |
| rs2057291  | 20 | GNAS | 0.26 | Add | 1.24(1.07-1.44) | 4.42E-03 | 2.05E-01 |

|            |         |          |                 |          |          |
|------------|---------|----------|-----------------|----------|----------|
| rs6026584  | 20 GNAS | 0.27 Add | 1.23(1.06-1.43) | 5.60E-03 | 2.45E-01 |
| rs3730168  | 20 GNAS | 0.26 Add | 1.24(1.06-1.44) | 6.28E-03 | 2.68E-01 |
| rs6026574  | 20 GNAS | 0.27 Add | 1.21(1.04-1.4)  | 1.35E-02 | 4.54E-01 |
| rs4812042  | 20 GNAS | 0.28 Add | 1.2(1.03-1.39)  | 1.65E-02 | 5.14E-01 |
| rs7121     | 20 GNAS | 0.34 Add | 1.18(1.03-1.37) | 1.94E-02 | 5.60E-01 |
| rs2180696  | 20 GNAS | 0.34 Add | 1.16(1-1.33)    | 4.27E-02 | 8.04E-01 |
| rs6123833  | 20 GNAS | 0.16 Rec | 0.5(0.23-1.07)  | 7.33E-02 | 8.79E-01 |
| rs4812040  | 20 GNAS | 0.16 Rec | 0.5(0.23-1.07)  | 7.33E-02 | 8.79E-01 |
| rs2145288  | 20 GNAS | 0.15 Rec | 0.48(0.22-1.08) | 7.63E-02 | 8.86E-01 |
| rs12625436 | 20 GNAS | 0.35 Rec | 1.06(0.79-1.43) | 7.03E-01 | 9.11E-01 |
| rs12479894 | 20 GNAS | 0.02 Add | 0.64(0.34-1.18) | 1.54E-01 | 9.13E-01 |
| rs6100269  | 20 GNAS | 0.09 Dom | 0.83(0.64-1.07) | 1.49E-01 | 9.20E-01 |
| rs4810147  | 20 GNAS | 0.17 Rec | 0.54(0.26-1.11) | 9.33E-02 | 9.33E-01 |
| rs8125112  | 20 GNAS | 0.02 Add | 0.67(0.37-1.21) | 1.86E-01 | 9.38E-01 |
| rs6015389  | 20 GNAS | 0.02 Add | 0.67(0.38-1.2)  | 1.79E-01 | 9.40E-01 |
| rs6026557  | 20 GNAS | 0.11 Rec | 0.4(0.13-1.24)  | 1.13E-01 | 9.42E-01 |
| rs35113254 | 20 GNAS | 0.02 Add | 0.68(0.37-1.24) | 2.09E-01 | 9.57E-01 |
| rs6026562  | 20 GNAS | 0.02 Add | 0.68(0.37-1.24) | 2.09E-01 | 9.57E-01 |
| rs919197   | 20 GNAS | 0.32 Dom | 1.17(0.96-1.41) | 1.19E-01 | 9.69E-01 |
| rs6026561  | 20 GNAS | 0.02 Add | 0.7(0.4-1.25)   | 2.34E-01 | 9.72E-01 |
| rs234630   | 20 GNAS | 0.14 Rec | 0.93(0.46-1.86) | 8.35E-01 | 9.72E-01 |
| rs1800900  | 20 GNAS | 0.16 Add | 0.87(0.72-1.05) | 1.37E-01 | 9.81E-01 |
| rs3787493  | 20 GNAS | 0.32 Dom | 1.15(0.95-1.4)  | 1.43E-01 | 9.83E-01 |
| rs3761264  | 20 GNAS | 0.18 Dom | 0.89(0.73-1.09) | 2.71E-01 | 9.84E-01 |
| rs234623   | 20 GNAS | 0.44 Dom | 1.17(0.95-1.44) | 1.52E-01 | 9.87E-01 |
| rs6026567  | 20 GNAS | 0.33 Rec | 1.1(0.8-1.5)    | 5.63E-01 | 9.87E-01 |
| rs2295583  | 20 GNAS | 0.05 Dom | 0.83(0.6-1.16)  | 2.77E-01 | 9.90E-01 |
| rs234628   | 20 GNAS | 0.32 Dom | 1.11(0.92-1.34) | 2.90E-01 | 9.91E-01 |
| rs6026593  | 20 GNAS | 0.10 Add | 0.86(0.68-1.08) | 1.90E-01 | 9.92E-01 |
| rs7273251  | 20 GNAS | 0.01 Add | 1.36(0.7-2.63)  | 3.59E-01 | 9.92E-01 |
| rs6123832  | 20 GNAS | 0.18 Dom | 0.9(0.74-1.11)  | 3.33E-01 | 9.92E-01 |
| rs7271854  | 20 GNAS | 0.33 Rec | 1.14(0.84-1.56) | 4.06E-01 | 9.94E-01 |
| rs3787496  | 20 GNAS | 0.07 Add | 0.9(0.68-1.18)  | 4.51E-01 | 9.95E-01 |
| rs234627   | 20 GNAS | 0.25 Dom | 1.06(0.88-1.29) | 5.25E-01 | 9.95E-01 |

|           |         |          |                 |          |          |
|-----------|---------|----------|-----------------|----------|----------|
| rs234629  | 20 GNAS | 0.32 Dom | 1.11(0.92-1.35) | 2.69E-01 | 9.96E-01 |
| rs3730170 | 20 GNAS | 0.02 Dom | 0.89(0.52-1.52) | 6.64E-01 | 9.96E-01 |
| rs965808  | 20 GNAS | 0.17 Rec | 0.79(0.41-1.53) | 4.86E-01 | 9.97E-01 |
| rs151331  | 20 GNAS | 0.26 Rec | 1.09(0.74-1.6)  | 6.55E-01 | 9.97E-01 |
| rs4810148 | 20 GNAS | 0.33 Add | 1.08(0.93-1.25) | 3.09E-01 | 9.97E-01 |
| rs6123836 | 20 GNAS | 0.33 Add | 1.08(0.93-1.25) | 3.09E-01 | 9.97E-01 |
| rs234618  | 20 GNAS | 0.26 Rec | 1.1(0.75-1.61)  | 6.38E-01 | 9.98E-01 |
| rs234625  | 20 GNAS | 0.26 Rec | 1.1(0.75-1.61)  | 6.38E-01 | 9.98E-01 |
| rs234621  | 20 GNAS | 0.26 Rec | 1.1(0.75-1.61)  | 6.38E-01 | 9.98E-01 |
| rs919196  | 20 GNAS | 0.18 Dom | 1.09(0.89-1.33) | 4.05E-01 | 9.99E-01 |
| rs3788341 | 22 GNAZ | 0.44 Add | 1.12(0.97-1.28) | 1.12E-01 | 8.33E-01 |
| rs3788340 | 22 GNAZ | 0.41 Add | 1.12(0.97-1.28) | 1.17E-01 | 8.46E-01 |
| rs756632  | 22 GNAZ | 0.05 Dom | 0.96(0.69-1.34) | 8.06E-01 | 8.52E-01 |
| rs5751574 | 22 GNAZ | 0.41 Add | 1.11(0.97-1.28) | 1.25E-01 | 8.62E-01 |
| rs3788339 | 22 GNAZ | 0.36 Dom | 1.18(0.97-1.43) | 1.04E-01 | 8.75E-01 |
| rs9612225 | 22 GNAZ | 0.04 Add | 1.05(0.76-1.45) | 7.70E-01 | 9.47E-01 |
| rs5751579 | 22 GNAZ | 0.38 Rec | 1.21(0.93-1.57) | 1.57E-01 | 9.57E-01 |
| rs2266997 | 22 GNAZ | 0.39 Rec | 1.2(0.93-1.55)  | 1.68E-01 | 9.66E-01 |
| rs2266998 | 22 GNAZ | 0.39 Rec | 1.2(0.93-1.55)  | 1.68E-01 | 9.66E-01 |
| rs2330338 | 22 GNAZ | 0.40 Rec | 1.2(0.93-1.54)  | 1.72E-01 | 9.69E-01 |
| rs3788337 | 22 GNAZ | 0.42 Dom | 1.15(0.94-1.41) | 1.76E-01 | 9.69E-01 |
| rs2266996 | 22 GNAZ | 0.41 Rec | 1.18(0.92-1.52) | 1.92E-01 | 9.78E-01 |
| rs885962  | 22 GNAZ | 0.39 Rec | 1.19(0.92-1.53) | 1.95E-01 | 9.79E-01 |
| rs1989777 | 22 GNAZ | 0.39 Rec | 1.18(0.91-1.53) | 2.15E-01 | 9.87E-01 |
| rs1989778 | 22 GNAZ | 0.39 Rec | 1.18(0.91-1.53) | 2.15E-01 | 9.87E-01 |
| rs5751589 | 22 GNAZ | 0.42 Dom | 1.07(0.87-1.31) | 5.19E-01 | 9.87E-01 |
| rs739362  | 22 GNAZ | 0.38 Rec | 1.17(0.9-1.53)  | 2.44E-01 | 9.92E-01 |
| rs2330336 | 22 GNAZ | 0.39 Rec | 1.17(0.9-1.51)  | 2.44E-01 | 9.92E-01 |
| rs2266995 | 22 GNAZ | 0.39 Rec | 1.17(0.9-1.51)  | 2.44E-01 | 9.92E-01 |
| rs1805058 | 22 GNAZ | 0.39 Rec | 1.17(0.9-1.51)  | 2.44E-01 | 9.92E-01 |
| rs6003502 | 22 GNAZ | 0.39 Rec | 1.17(0.9-1.51)  | 2.44E-01 | 9.92E-01 |
| rs874138  | 22 GNAZ | 0.39 Rec | 1.17(0.9-1.51)  | 2.44E-01 | 9.92E-01 |
| rs4820537 | 22 GNAZ | 0.40 Dom | 1.08(0.89-1.32) | 4.32E-01 | 9.92E-01 |
| rs3788346 | 22 GNAZ | 0.39 Add | 1.07(0.93-1.23) | 3.28E-01 | 9.93E-01 |



|            |         |          |                 |          |          |
|------------|---------|----------|-----------------|----------|----------|
| rs4822354  | 22 GNAZ | 0.39 Add | 1.07(0.93-1.23) | 3.28E-01 | 9.93E-01 |
| rs1989776  | 22 GNAZ | 0.39 Rec | 1.17(0.9-1.52)  | 2.41E-01 | 9.93E-01 |
| rs4820536  | 22 GNAZ | 0.39 Add | 1.07(0.93-1.23) | 3.28E-01 | 9.93E-01 |
| rs3827315  | 22 GNAZ | 0.39 Rec | 1.17(0.9-1.52)  | 2.41E-01 | 9.93E-01 |
| rs5751576  | 22 GNAZ | 0.39 Rec | 1.17(0.9-1.52)  | 2.41E-01 | 9.93E-01 |
| rs5751578  | 22 GNAZ | 0.39 Rec | 1.17(0.9-1.52)  | 2.41E-01 | 9.93E-01 |
| rs5759580  | 22 GNAZ | 0.39 Rec | 1.17(0.9-1.52)  | 2.41E-01 | 9.93E-01 |
| rs3788342  | 22 GNAZ | 0.39 Rec | 1.17(0.9-1.52)  | 2.41E-01 | 9.93E-01 |
| rs3788343  | 22 GNAZ | 0.39 Rec | 1.17(0.9-1.52)  | 2.41E-01 | 9.93E-01 |
| rs1858746  | 22 GNAZ | 0.41 Rec | 1.16(0.9-1.5)   | 2.44E-01 | 9.93E-01 |
| rs2283802  | 22 GNAZ | 0.36 Add | 1.07(0.93-1.23) | 3.58E-01 | 9.95E-01 |
| rs9306383  | 22 GNAZ | 0.06 Add | 1.1(0.84-1.46)  | 4.85E-01 | 9.95E-01 |
| rs2266999  | 22 GNAZ | 0.45 Dom | 0.93(0.76-1.15) | 5.14E-01 | 9.96E-01 |
| rs5751583  | 22 GNAZ | 0.49 Dom | 0.89(0.72-1.11) | 3.13E-01 | 9.96E-01 |
| rs6519411  | 22 GNAZ | 0.39 Add | 1.06(0.93-1.22) | 3.69E-01 | 9.96E-01 |
| rs3810614  | 22 GNAZ | 0.39 Rec | 1.16(0.89-1.5)  | 2.80E-01 | 9.96E-01 |
| rs2157710  | 22 GNAZ | 0.41 Dom | 1.1(0.9-1.35)   | 3.56E-01 | 9.97E-01 |
| rs2267000  | 22 GNAZ | 0.41 Dom | 1.1(0.9-1.34)   | 3.60E-01 | 9.98E-01 |
| rs2283803  | 22 GNAZ | 0.41 Dom | 1.1(0.9-1.34)   | 3.60E-01 | 9.98E-01 |
| rs916583   | 22 GNAZ | 0.42 Add | 1.04(0.91-1.19) | 5.72E-01 | 9.98E-01 |
| rs6003518  | 22 GNAZ | 0.42 Add | 1.04(0.91-1.19) | 5.72E-01 | 9.98E-01 |
| rs5751587  | 22 GNAZ | 0.42 Add | 1.04(0.91-1.19) | 5.72E-01 | 9.98E-01 |
| rs1051875  | 22 GNAZ | 0.42 Add | 1.04(0.91-1.19) | 5.72E-01 | 9.98E-01 |
| rs916585   | 22 GNAZ | 0.42 Add | 1.04(0.91-1.19) | 5.72E-01 | 9.98E-01 |
| rs4822357  | 22 GNAZ | 0.42 Add | 1.04(0.91-1.19) | 5.72E-01 | 9.98E-01 |
| rs3788347  | 22 GNAZ | 0.42 Add | 1.04(0.91-1.19) | 5.72E-01 | 9.98E-01 |
| rs4822359  | 22 GNAZ | 0.42 Add | 1.04(0.91-1.19) | 5.72E-01 | 9.98E-01 |
| rs916584   | 22 GNAZ | 0.42 Add | 1.04(0.91-1.19) | 5.72E-01 | 9.98E-01 |
| rs3788350  | 22 GNAZ | 0.42 Add | 1.04(0.91-1.19) | 5.72E-01 | 9.98E-01 |
| rs885964   | 22 GNAZ | 0.42 Add | 1.05(0.92-1.21) | 4.79E-01 | 9.98E-01 |
| rs9612237  | 22 GNAZ | 0.42 Dom | 1.08(0.88-1.32) | 4.82E-01 | 9.98E-01 |
| rs13054985 | 22 GNAZ | 0.41 Dom | 1.09(0.89-1.33) | 4.08E-01 | 9.98E-01 |
| rs2267001  | 22 GNAZ | 0.41 Dom | 1.09(0.89-1.33) | 4.08E-01 | 9.98E-01 |
| rs2267003  | 22 GNAZ | 0.41 Dom | 1.09(0.89-1.33) | 4.08E-01 | 9.98E-01 |

|            |         |          |                 |          |          |
|------------|---------|----------|-----------------|----------|----------|
| rs9612234  | 22 GNAZ | 0.42 Add | 1.04(0.91-1.2)  | 5.51E-01 | 9.98E-01 |
| rs3788348  | 22 GNAZ | 0.42 Add | 1.04(0.91-1.19) | 5.76E-01 | 9.98E-01 |
| rs9608071  | 22 GNAZ | 0.04 Add | 1.06(0.77-1.46) | 7.32E-01 | 9.98E-01 |
| rs13054904 | 22 GNAZ | 0.04 Add | 1.06(0.77-1.46) | 7.32E-01 | 9.98E-01 |
| rs885965   | 22 GNAZ | 0.43 Add | 1.05(0.92-1.2)  | 4.85E-01 | 9.98E-01 |
| rs2267005  | 22 GNAZ | 0.43 Add | 1.05(0.92-1.2)  | 4.85E-01 | 9.98E-01 |
| rs756631   | 22 GNAZ | 0.43 Add | 1.05(0.92-1.2)  | 4.85E-01 | 9.98E-01 |
| rs2267004  | 22 GNAZ | 0.41 Dom | 1.09(0.89-1.33) | 4.20E-01 | 9.98E-01 |
| rs3788351  | 22 GNAZ | 0.42 Add | 1.04(0.91-1.2)  | 5.67E-01 | 9.98E-01 |
| rs5759593  | 22 GNAZ | 0.42 Dom | 1.07(0.88-1.31) | 5.00E-01 | 9.98E-01 |
| rs13054331 | 22 GNAZ | 0.04 Add | 1.06(0.77-1.45) | 7.42E-01 | 9.98E-01 |
| rs12484077 | 22 GNAZ | 0.06 Add | 0.93(0.7-1.24)  | 6.36E-01 | 9.98E-01 |
| rs9624019  | 22 GNAZ | 0.37 Dom | 1.09(0.89-1.32) | 4.06E-01 | 9.99E-01 |
| rs885963   | 22 GNAZ | 0.43 Add | 1.05(0.92-1.21) | 4.68E-01 | 9.99E-01 |
| rs13055979 | 22 GNAZ | 0.05 Dom | 0.92(0.65-1.3)  | 6.42E-01 | 9.99E-01 |
| rs12950752 | 17 GRB2 | 0.09 Add | 1.13(0.89-1.44) | 3.18E-01 | 9.45E-01 |
| rs6501775  | 17 GRB2 | 0.07 Add | 1.14(0.88-1.48) | 3.16E-01 | 9.47E-01 |
| rs12600908 | 17 GRB2 | 0.03 Dom | 1.02(0.67-1.55) | 9.27E-01 | 9.55E-01 |
| rs9909076  | 17 GRB2 | 0.07 Add | 1.13(0.87-1.49) | 3.59E-01 | 9.65E-01 |
| rs2053158  | 17 GRB2 | 0.07 Add | 1.13(0.86-1.48) | 3.73E-01 | 9.70E-01 |
| rs16967789 | 17 GRB2 | 0.03 Dom | 1.03(0.67-1.57) | 8.95E-01 | 9.71E-01 |
| rs4789182  | 17 GRB2 | 0.09 Add | 1.11(0.89-1.39) | 3.68E-01 | 9.72E-01 |
| rs9892166  | 17 GRB2 | 0.09 Add | 1.11(0.89-1.39) | 3.68E-01 | 9.72E-01 |
| rs4789189  | 17 GRB2 | 0.07 Add | 1.13(0.86-1.48) | 3.80E-01 | 9.73E-01 |
| rs2053156  | 17 GRB2 | 0.07 Add | 1.13(0.86-1.48) | 3.80E-01 | 9.73E-01 |
| rs4789173  | 17 GRB2 | 0.07 Add | 1.13(0.86-1.48) | 3.81E-01 | 9.74E-01 |
| rs1369299  | 17 GRB2 | 0.07 Add | 1.13(0.86-1.48) | 3.81E-01 | 9.74E-01 |
| rs9302990  | 17 GRB2 | 0.07 Add | 1.13(0.86-1.48) | 3.81E-01 | 9.74E-01 |
| rs4789176  | 17 GRB2 | 0.07 Add | 1.13(0.86-1.48) | 3.81E-01 | 9.74E-01 |
| rs4789178  | 17 GRB2 | 0.07 Add | 1.13(0.86-1.48) | 3.92E-01 | 9.77E-01 |
| rs7222002  | 17 GRB2 | 0.07 Add | 1.13(0.86-1.48) | 3.92E-01 | 9.77E-01 |
| rs2033607  | 17 GRB2 | 0.07 Add | 1.13(0.86-1.48) | 3.92E-01 | 9.77E-01 |
| rs930297   | 17 GRB2 | 0.07 Add | 1.12(0.86-1.47) | 4.01E-01 | 9.79E-01 |
| rs6501786  | 17 GRB2 | 0.07 Dom | 1.12(0.84-1.49) | 4.46E-01 | 9.80E-01 |

|            |          |          |                 |          |          |
|------------|----------|----------|-----------------|----------|----------|
| rs2117563  | 17 GRB2  | 0.07 Dom | 1.12(0.84-1.49) | 4.46E-01 | 9.80E-01 |
| rs4789181  | 17 GRB2  | 0.07 Dom | 1.12(0.84-1.49) | 4.46E-01 | 9.80E-01 |
| rs9902966  | 17 GRB2  | 0.07 Add | 1.12(0.86-1.47) | 4.04E-01 | 9.80E-01 |
| rs9912608  | 17 GRB2  | 0.09 Add | 1.1(0.88-1.38)  | 4.14E-01 | 9.83E-01 |
| rs4789170  | 17 GRB2  | 0.09 Add | 1.1(0.88-1.38)  | 4.14E-01 | 9.83E-01 |
| rs7207618  | 17 GRB2  | 0.09 Dom | 1.1(0.85-1.41)  | 4.71E-01 | 9.83E-01 |
| rs7219     | 17 GRB2  | 0.11 Add | 1.13(0.91-1.39) | 2.65E-01 | 9.84E-01 |
| rs8065441  | 17 GRB2  | 0.07 Add | 1.11(0.85-1.46) | 4.37E-01 | 9.86E-01 |
| rs4350602  | 17 GRB2  | 0.09 Add | 1.09(0.87-1.37) | 4.34E-01 | 9.86E-01 |
| rs9908820  | 17 GRB2  | 0.06 Dom | 1.12(0.83-1.52) | 4.49E-01 | 9.86E-01 |
| rs8081778  | 17 GRB2  | 0.07 Add | 1.11(0.85-1.46) | 4.43E-01 | 9.86E-01 |
| rs4559942  | 17 GRB2  | 0.09 Add | 1.09(0.87-1.38) | 4.41E-01 | 9.87E-01 |
| rs12946365 | 17 GRB2  | 0.09 Add | 1.09(0.87-1.36) | 4.54E-01 | 9.88E-01 |
| rs3744233  | 17 GRB2  | 0.03 Add | 1.07(0.72-1.58) | 7.52E-01 | 9.92E-01 |
| rs4542691  | 17 GRB2  | 0.09 Add | 1.08(0.86-1.36) | 4.95E-01 | 9.93E-01 |
| rs4789172  | 17 GRB2  | 0.24 Rec | 0.91(0.6-1.39)  | 6.75E-01 | 9.94E-01 |
| rs8079197  | 17 GRB2  | 0.09 Add | 1.08(0.86-1.35) | 5.06E-01 | 9.94E-01 |
| rs930296   | 17 GRB2  | 0.06 Dom | 1.08(0.81-1.45) | 6.01E-01 | 9.95E-01 |
| rs8067903  | 17 GRB2  | 0.06 Add | 1.09(0.83-1.44) | 5.31E-01 | 9.95E-01 |
| rs12945469 | 17 GRB2  | 0.06 Add | 1.08(0.8-1.45)  | 6.27E-01 | 9.95E-01 |
| rs9909443  | 17 GRB2  | 0.03 Dom | 1.1(0.74-1.63)  | 6.28E-01 | 9.96E-01 |
| rs4788890  | 17 GRB2  | 0.03 Add | 1.1(0.72-1.69)  | 6.47E-01 | 9.96E-01 |
| rs2891713  | 17 GRB2  | 0.03 Add | 1.1(0.72-1.69)  | 6.47E-01 | 9.96E-01 |
| rs4788889  | 17 GRB2  | 0.03 Add | 1.08(0.7-1.68)  | 7.16E-01 | 9.96E-01 |
| rs9901434  | 17 GRB2  | 0.03 Add | 1.08(0.7-1.68)  | 7.16E-01 | 9.96E-01 |
| rs12940914 | 17 GRB2  | 0.03 Add | 1.08(0.7-1.68)  | 7.16E-01 | 9.96E-01 |
| rs4789186  | 17 GRB2  | 0.03 Add | 1.08(0.7-1.68)  | 7.16E-01 | 9.96E-01 |
| rs9897815  | 17 GRB2  | 0.02 Dom | 1.12(0.72-1.75) | 6.16E-01 | 9.96E-01 |
| rs4788891  | 17 GRB2  | 0.03 Dom | 1.1(0.74-1.66)  | 6.30E-01 | 9.97E-01 |
| rs4789188  | 17 GRB2  | 0.03 Dom | 1.1(0.74-1.66)  | 6.30E-01 | 9.97E-01 |
| rs9914731  | 17 GRB2  | 0.03 Dom | 1.1(0.74-1.66)  | 6.30E-01 | 9.97E-01 |
| rs7207506  | 17 GRB2  | 0.03 Add | 1.04(0.7-1.53)  | 8.57E-01 | 9.99E-01 |
| rs4789193  | 17 GRB2  | 0.03 Add | 1.03(0.7-1.52)  | 8.89E-01 | 9.99E-01 |
| rs10914457 | 1 HCRTR1 | 0.14 Add | 1.23(1.01-1.49) | 3.48E-02 | 2.44E-01 |

|            |          |          |                 |          |          |
|------------|----------|----------|-----------------|----------|----------|
| rs10798882 | 1 HCRTR1 | 0.27 Rec | 1.41(0.98-2.04) | 6.66E-02 | 5.42E-01 |
| rs10914453 | 1 HCRTR1 | 0.32 Dom | 1.06(0.88-1.29) | 5.38E-01 | 7.85E-01 |
| rs871634   | 1 HCRTR1 | 0.31 Rec | 1.16(0.84-1.6)  | 3.65E-01 | 8.33E-01 |
| rs7546297  | 1 HCRTR1 | 0.32 Rec | 1.17(0.86-1.61) | 3.20E-01 | 8.62E-01 |
| rs3753612  | 1 HCRTR1 | 0.28 Add | 1.07(0.92-1.24) | 3.95E-01 | 8.71E-01 |
| rs7524405  | 1 HCRTR1 | 0.28 Rec | 1.26(0.89-1.77) | 1.86E-01 | 8.73E-01 |
| rs4949454  | 1 HCRTR1 | 0.26 Dom | 1.09(0.9-1.32)  | 3.90E-01 | 8.80E-01 |
| rs10914458 | 1 HCRTR1 | 0.26 Dom | 1.09(0.9-1.32)  | 3.97E-01 | 8.84E-01 |
| rs7529064  | 1 HCRTR1 | 0.26 Dom | 1.09(0.9-1.32)  | 3.97E-01 | 8.84E-01 |
| rs968335   | 1 HCRTR1 | 0.26 Dom | 1.09(0.9-1.32)  | 3.95E-01 | 8.85E-01 |
| rs2176807  | 1 HCRTR1 | 0.26 Dom | 1.09(0.9-1.32)  | 4.05E-01 | 8.91E-01 |
| rs3753614  | 1 HCRTR1 | 0.27 Rec | 1.12(0.78-1.63) | 5.36E-01 | 9.03E-01 |
| rs3753613  | 1 HCRTR1 | 0.27 Rec | 1.12(0.78-1.63) | 5.32E-01 | 9.03E-01 |
| rs6703093  | 1 HCRTR1 | 0.26 Dom | 1.08(0.89-1.31) | 4.22E-01 | 9.03E-01 |
| rs10914456 | 1 HCRTR1 | 0.28 Add | 1.09(0.94-1.27) | 2.62E-01 | 9.14E-01 |
| rs2271933  | 1 HCRTR1 | 0.27 Dom | 1.08(0.89-1.3)  | 4.54E-01 | 9.23E-01 |
| rs12402191 | 1 HCRTR1 | 0.06 Dom | 1.11(0.83-1.48) | 4.84E-01 | 9.25E-01 |
| rs10798880 | 1 HCRTR1 | 0.31 Rec | 1.19(0.87-1.63) | 2.78E-01 | 9.25E-01 |
| rs3134711  | 6 HCRTR2 | 0.24 Rec | 1.74(1.19-2.55) | 4.49E-03 | 3.22E-01 |
| rs9367624  | 6 HCRTR2 | 0.19 Rec | 1.93(1.2-3.1)   | 6.73E-03 | 4.22E-01 |
| rs4311512  | 6 HCRTR2 | 0.19 Rec | 1.93(1.2-3.1)   | 6.73E-03 | 4.23E-01 |
| rs9357849  | 6 HCRTR2 | 0.19 Rec | 1.93(1.2-3.1)   | 6.73E-03 | 4.23E-01 |
| rs7771240  | 6 HCRTR2 | 0.19 Rec | 1.92(1.2-3.09)  | 6.85E-03 | 4.27E-01 |
| rs7741664  | 6 HCRTR2 | 0.19 Rec | 1.92(1.2-3.09)  | 6.85E-03 | 4.28E-01 |
| rs9382471  | 6 HCRTR2 | 0.19 Rec | 1.92(1.2-3.09)  | 6.85E-03 | 4.28E-01 |
| rs9396069  | 6 HCRTR2 | 0.19 Rec | 1.92(1.2-3.09)  | 6.85E-03 | 4.29E-01 |
| rs9357853  | 6 HCRTR2 | 0.19 Rec | 1.92(1.2-3.09)  | 6.85E-03 | 4.29E-01 |
| rs3122160  | 6 HCRTR2 | 0.19 Rec | 1.86(1.17-2.96) | 8.57E-03 | 4.45E-01 |
| rs9349774  | 6 HCRTR2 | 0.18 Rec | 1.93(1.19-3.12) | 7.54E-03 | 4.53E-01 |
| rs4074181  | 6 HCRTR2 | 0.18 Rec | 1.93(1.19-3.15) | 7.87E-03 | 4.62E-01 |
| rs4631286  | 6 HCRTR2 | 0.19 Rec | 1.88(1.17-3.02) | 8.86E-03 | 4.96E-01 |
| rs4311511  | 6 HCRTR2 | 0.19 Rec | 1.87(1.17-3)    | 9.18E-03 | 5.07E-01 |
| rs3122164  | 6 HCRTR2 | 0.25 Rec | 1.63(1.12-2.37) | 9.97E-03 | 5.26E-01 |
| rs3134710  | 6 HCRTR2 | 0.24 Add | 1.22(1.05-1.43) | 1.15E-02 | 5.47E-01 |

|            |          |          |                 |          |          |
|------------|----------|----------|-----------------|----------|----------|
| rs4496804  | 6 HCRTR2 | 0.19 Rec | 1.84(1.15-2.95) | 1.17E-02 | 5.74E-01 |
| rs9396062  | 6 HCRTR2 | 0.19 Rec | 1.84(1.14-2.96) | 1.26E-02 | 5.96E-01 |
| rs9349768  | 6 HCRTR2 | 0.19 Rec | 1.84(1.14-2.96) | 1.26E-02 | 5.96E-01 |
| rs9382465  | 6 HCRTR2 | 0.19 Rec | 1.84(1.14-2.96) | 1.26E-02 | 5.96E-01 |
| rs9396063  | 6 HCRTR2 | 0.19 Rec | 1.84(1.14-2.96) | 1.26E-02 | 5.97E-01 |
| rs4530845  | 6 HCRTR2 | 0.19 Rec | 1.84(1.14-2.96) | 1.26E-02 | 5.97E-01 |
| rs9357855  | 6 HCRTR2 | 0.19 Rec | 1.83(1.14-2.95) | 1.28E-02 | 6.00E-01 |
| rs9357850  | 6 HCRTR2 | 0.19 Rec | 1.83(1.14-2.95) | 1.28E-02 | 6.01E-01 |
| rs7754675  | 6 HCRTR2 | 0.19 Rec | 1.83(1.14-2.95) | 1.28E-02 | 6.01E-01 |
| rs9349772  | 6 HCRTR2 | 0.19 Rec | 1.83(1.14-2.95) | 1.28E-02 | 6.02E-01 |
| rs9357851  | 6 HCRTR2 | 0.19 Rec | 1.83(1.14-2.95) | 1.28E-02 | 6.02E-01 |
| rs3122156  | 6 HCRTR2 | 0.24 Add | 1.22(1.04-1.42) | 1.40E-02 | 6.05E-01 |
| rs9349771  | 6 HCRTR2 | 0.18 Rec | 1.83(1.13-2.98) | 1.42E-02 | 6.30E-01 |
| rs9367626  | 6 HCRTR2 | 0.18 Rec | 1.83(1.13-2.98) | 1.42E-02 | 6.30E-01 |
| rs3122169  | 6 HCRTR2 | 0.46 Dom | 0.78(0.63-0.96) | 1.74E-02 | 6.73E-01 |
| rs1542896  | 6 HCRTR2 | 0.22 Dom | 0.79(0.65-0.96) | 1.90E-02 | 6.78E-01 |
| rs12191932 | 6 HCRTR2 | 0.22 Dom | 0.79(0.65-0.96) | 1.90E-02 | 6.79E-01 |
| rs2292041  | 6 HCRTR2 | 0.22 Dom | 0.79(0.65-0.96) | 1.90E-02 | 6.79E-01 |
| rs10456702 | 6 HCRTR2 | 0.22 Dom | 0.79(0.65-0.96) | 1.90E-02 | 6.79E-01 |
| rs1910123  | 6 HCRTR2 | 0.22 Dom | 0.79(0.65-0.96) | 2.02E-02 | 6.99E-01 |
| rs9382464  | 6 HCRTR2 | 0.24 Add | 1.18(1.01-1.38) | 3.55E-02 | 8.67E-01 |
| rs9357845  | 6 HCRTR2 | 0.19 Dom | 1.01(0.83-1.24) | 9.18E-01 | 9.18E-01 |
| rs7756097  | 6 HCRTR2 | 0.19 Dom | 1.02(0.83-1.24) | 8.82E-01 | 9.37E-01 |
| rs3122167  | 6 HCRTR2 | 0.30 Rec | 1.39(1-1.95)    | 5.03E-02 | 9.42E-01 |
| rs9475214  | 6 HCRTR2 | 0.22 Rec | 1.51(1-2.28)    | 5.22E-02 | 9.47E-01 |
| rs3122162  | 6 HCRTR2 | 0.30 Rec | 1.38(0.99-1.91) | 5.45E-02 | 9.48E-01 |
| rs4431422  | 6 HCRTR2 | 0.19 Dom | 1.01(0.83-1.24) | 9.10E-01 | 9.54E-01 |
| rs7771743  | 6 HCRTR2 | 0.19 Dom | 1.01(0.83-1.24) | 9.10E-01 | 9.54E-01 |
| rs3134708  | 6 HCRTR2 | 0.28 Add | 1.15(0.99-1.33) | 6.22E-02 | 9.57E-01 |
| rs6922310  | 6 HCRTR2 | 0.28 Add | 1.15(0.99-1.33) | 6.31E-02 | 9.59E-01 |
| rs3122153  | 6 HCRTR2 | 0.28 Add | 1.15(0.99-1.33) | 6.51E-02 | 9.63E-01 |
| rs7758861  | 6 HCRTR2 | 0.03 Add | 1.32(0.91-1.92) | 1.40E-01 | 9.69E-01 |
| rs4142972  | 6 HCRTR2 | 0.31 Dom | 0.84(0.69-1.02) | 7.34E-02 | 9.70E-01 |
| rs2811239  | 6 HCRTR2 | 0.41 Dom | 0.83(0.68-1.02) | 7.01E-02 | 9.71E-01 |

|            |          |          |                 |          |          |
|------------|----------|----------|-----------------|----------|----------|
| rs9382467  | 6 HCRTR2 | 0.29 Rec | 1.36(0.97-1.9)  | 7.58E-02 | 9.76E-01 |
| rs9396060  | 6 HCRTR2 | 0.28 Add | 1.13(0.98-1.32) | 9.67E-02 | 9.88E-01 |
| rs12662510 | 6 HCRTR2 | 0.28 Add | 1.13(0.98-1.32) | 9.95E-02 | 9.89E-01 |
| rs2811228  | 6 HCRTR2 | 0.49 Add | 0.9(0.79-1.03)  | 1.39E-01 | 9.91E-01 |
| rs9370402  | 6 HCRTR2 | 0.02 Add | 0.74(0.45-1.2)  | 2.25E-01 | 9.92E-01 |
| rs7452651  | 6 HCRTR2 | 0.16 Dom | 1.14(0.93-1.41) | 2.10E-01 | 9.92E-01 |
| rs2653354  | 6 HCRTR2 | 0.49 Dom | 0.84(0.67-1.04) | 1.09E-01 | 9.92E-01 |
| rs2653353  | 6 HCRTR2 | 0.49 Dom | 0.84(0.67-1.04) | 1.09E-01 | 9.92E-01 |
| rs2653352  | 6 HCRTR2 | 0.49 Dom | 0.84(0.67-1.04) | 1.09E-01 | 9.92E-01 |
| rs2653343  | 6 HCRTR2 | 0.06 Add | 0.97(0.72-1.31) | 8.43E-01 | 9.93E-01 |
| rs10456181 | 6 HCRTR2 | 0.16 Dom | 0.97(0.78-1.19) | 7.55E-01 | 9.95E-01 |
| rs1553332  | 6 HCRTR2 | 0.32 Dom | 0.86(0.71-1.05) | 1.31E-01 | 9.96E-01 |
| rs2653357  | 6 HCRTR2 | 0.50 Add | 0.91(0.79-1.04) | 1.75E-01 | 9.96E-01 |
| rs2653359  | 6 HCRTR2 | 0.50 Add | 0.91(0.79-1.04) | 1.75E-01 | 9.96E-01 |
| rs2811231  | 6 HCRTR2 | 0.50 Add | 0.91(0.79-1.04) | 1.75E-01 | 9.96E-01 |
| rs2811232  | 6 HCRTR2 | 0.50 Add | 0.91(0.79-1.04) | 1.75E-01 | 9.96E-01 |
| rs2811233  | 6 HCRTR2 | 0.50 Add | 0.91(0.79-1.04) | 1.75E-01 | 9.96E-01 |
| rs10456182 | 6 HCRTR2 | 0.16 Dom | 0.97(0.79-1.2)  | 7.82E-01 | 9.97E-01 |
| rs2653346  | 6 HCRTR2 | 0.45 Dom | 0.86(0.7-1.05)  | 1.45E-01 | 9.97E-01 |
| rs13200042 | 6 HCRTR2 | 0.03 Add | 1.26(0.84-1.88) | 2.68E-01 | 9.98E-01 |
| rs13198993 | 6 HCRTR2 | 0.03 Add | 1.26(0.84-1.88) | 2.68E-01 | 9.98E-01 |
| rs4609033  | 6 HCRTR2 | 0.03 Add | 1.26(0.84-1.88) | 2.68E-01 | 9.98E-01 |
| rs6927478  | 6 HCRTR2 | 0.23 Add | 1.1(0.94-1.29)  | 2.34E-01 | 9.98E-01 |
| rs4236127  | 6 HCRTR2 | 0.25 Dom | 1.11(0.91-1.34) | 2.98E-01 | 9.98E-01 |
| rs3134689  | 6 HCRTR2 | 0.25 Dom | 1.11(0.91-1.34) | 2.98E-01 | 9.98E-01 |
| rs3006854  | 6 HCRTR2 | 0.25 Dom | 1.11(0.91-1.34) | 2.98E-01 | 9.98E-01 |
| rs3122151  | 6 HCRTR2 | 0.25 Dom | 1.11(0.91-1.34) | 2.98E-01 | 9.98E-01 |
| rs12526414 | 6 HCRTR2 | 0.25 Dom | 1.1(0.91-1.34)  | 3.16E-01 | 9.98E-01 |
| rs3122148  | 6 HCRTR2 | 0.26 Rec | 1.21(0.84-1.75) | 3.05E-01 | 9.99E-01 |
| rs2134294  | 6 HCRTR2 | 0.37 Dom | 0.87(0.72-1.06) | 1.70E-01 | 9.99E-01 |
| rs4364482  | 6 HCRTR2 | 0.45 Rec | 1.07(0.84-1.35) | 5.87E-01 | 9.99E-01 |
| rs2653349  | 6 HCRTR2 | 0.06 Add | 0.95(0.71-1.27) | 7.18E-01 | 9.99E-01 |
| rs3122149  | 6 HCRTR2 | 0.29 Dom | 1.1(0.91-1.33)  | 3.44E-01 | 9.99E-01 |
| rs13343017 | 6 HCRTR2 | 0.29 Dom | 1.1(0.91-1.33)  | 3.44E-01 | 9.99E-01 |

|            |          |          |                 |          |          |
|------------|----------|----------|-----------------|----------|----------|
| rs2653350  | 6 HCRTR2 | 0.41 Add | 1.1(0.96-1.26)  | 1.86E-01 | 9.99E-01 |
| rs2653351  | 6 HCRTR2 | 0.41 Add | 1.1(0.96-1.26)  | 1.86E-01 | 9.99E-01 |
| rs11751491 | 6 HCRTR2 | 0.06 Dom | 1.16(0.87-1.57) | 3.15E-01 | 9.99E-01 |
| rs4712099  | 6 HCRTR2 | 0.30 Dom | 0.88(0.73-1.07) | 1.93E-01 | 9.99E-01 |
| rs10498801 | 6 HCRTR2 | 0.25 Rec | 1.19(0.82-1.73) | 3.51E-01 | 9.99E-01 |
| rs6937705  | 6 HCRTR2 | 0.25 Rec | 1.19(0.82-1.73) | 3.51E-01 | 9.99E-01 |
| rs6937878  | 6 HCRTR2 | 0.25 Rec | 1.19(0.82-1.73) | 3.51E-01 | 9.99E-01 |
| rs7767642  | 6 HCRTR2 | 0.19 Dom | 1.03(0.84-1.26) | 7.95E-01 | 9.99E-01 |
| rs2653342  | 6 HCRTR2 | 0.06 Add | 0.96(0.72-1.27) | 7.67E-01 | 9.99E-01 |
| rs12111375 | 6 HCRTR2 | 0.01 Add | 0.73(0.35-1.54) | 4.08E-01 | 9.99E-01 |
| rs9370403  | 6 HCRTR2 | 0.40 Add | 0.96(0.84-1.11) | 6.05E-01 | 9.99E-01 |
| rs3134696  | 6 HCRTR2 | 0.25 Dom | 1.09(0.9-1.32)  | 3.67E-01 | 9.99E-01 |
| rs9396056  | 6 HCRTR2 | 0.16 Add | 0.98(0.82-1.17) | 8.04E-01 | 1.00E+00 |
| rs3122163  | 6 HCRTR2 | 0.06 Dom | 1.15(0.86-1.54) | 3.59E-01 | 1.00E+00 |
| rs9382460  | 6 HCRTR2 | 0.30 Dom | 0.89(0.73-1.07) | 2.19E-01 | 1.00E+00 |
| rs4467775  | 6 HCRTR2 | 0.30 Dom | 0.88(0.73-1.07) | 2.08E-01 | 1.00E+00 |
| rs3134699  | 6 HCRTR2 | 0.25 Rec | 1.18(0.81-1.71) | 3.84E-01 | 1.00E+00 |
| rs3134701  | 6 HCRTR2 | 0.25 Rec | 1.18(0.81-1.71) | 3.84E-01 | 1.00E+00 |
| rs10948894 | 6 HCRTR2 | 0.25 Rec | 1.18(0.81-1.71) | 3.84E-01 | 1.00E+00 |
| rs12527963 | 6 HCRTR2 | 0.19 Dom | 1.13(0.93-1.38) | 2.14E-01 | 1.00E+00 |
| rs6929450  | 6 HCRTR2 | 0.45 Rec | 0.96(0.75-1.22) | 7.44E-01 | 1.00E+00 |
| rs3122154  | 6 HCRTR2 | 0.02 Add | 1.17(0.75-1.83) | 4.95E-01 | 1.00E+00 |
| rs2292040  | 6 HCRTR2 | 0.27 Dom | 0.93(0.76-1.12) | 4.35E-01 | 1.00E+00 |
| rs9464203  | 6 HCRTR2 | 0.03 Add | 1.15(0.75-1.75) | 5.32E-01 | 1.00E+00 |
| rs9367630  | 6 HCRTR2 | 0.27 Dom | 0.93(0.77-1.12) | 4.39E-01 | 1.00E+00 |
| rs9367622  | 6 HCRTR2 | 0.28 Dom | 1.07(0.89-1.3)  | 4.60E-01 | 1.00E+00 |
| rs7775745  | 6 HCRTR2 | 0.25 Add | 1.06(0.91-1.24) | 4.31E-01 | 1.00E+00 |
| rs6929837  | 6 HCRTR2 | 0.06 Add | 0.92(0.68-1.23) | 5.57E-01 | 1.00E+00 |
| rs3134704  | 6 HCRTR2 | 0.41 Dom | 0.97(0.79-1.18) | 7.34E-01 | 1.00E+00 |
| rs3134707  | 6 HCRTR2 | 0.02 Add | 1.18(0.75-1.85) | 4.75E-01 | 1.00E+00 |
| rs12663056 | 6 HCRTR2 | 0.25 Rec | 1.13(0.78-1.63) | 5.18E-01 | 1.00E+00 |
| rs7738215  | 6 HCRTR2 | 0.38 Dom | 0.93(0.77-1.13) | 4.89E-01 | 1.00E+00 |
| rs9475195  | 6 HCRTR2 | 0.39 Add | 0.95(0.82-1.09) | 4.46E-01 | 1.00E+00 |
| rs2653355  | 6 HCRTR2 | 0.12 Dom | 1.13(0.9-1.42)  | 2.88E-01 | 1.00E+00 |

|            |          |          |                 |          |          |
|------------|----------|----------|-----------------|----------|----------|
| rs9367621  | 6 HCRTR2 | 0.35 Rec | 1.17(0.87-1.57) | 3.01E-01 | 1.00E+00 |
| rs3122155  | 6 HCRTR2 | 0.43 Rec | 0.94(0.74-1.21) | 6.38E-01 | 1.00E+00 |
| rs10498802 | 6 HCRTR2 | 0.28 Dom | 1.08(0.89-1.31) | 4.21E-01 | 1.00E+00 |
| rs2653347  | 6 HCRTR2 | 0.06 Add | 0.93(0.69-1.25) | 6.44E-01 | 1.00E+00 |
| rs2653344  | 6 HCRTR2 | 0.06 Add | 0.93(0.69-1.25) | 6.44E-01 | 1.00E+00 |
| rs2653348  | 6 HCRTR2 | 0.34 Dom | 1.07(0.88-1.3)  | 4.81E-01 | 1.00E+00 |
| rs3134705  | 6 HCRTR2 | 0.41 Dom | 0.96(0.79-1.17) | 6.84E-01 | 1.00E+00 |
| rs7768760  | 6 HCRTR2 | 0.45 Rec | 0.95(0.75-1.21) | 6.91E-01 | 1.00E+00 |
| rs9370399  | 6 HCRTR2 | 0.45 Dom | 0.96(0.78-1.18) | 7.01E-01 | 1.00E+00 |
| rs9367629  | 6 HCRTR2 | 0.28 Dom | 1.08(0.89-1.31) | 4.37E-01 | 1.00E+00 |
| rs3800539  | 6 HCRTR2 | 0.28 Dom | 1.08(0.89-1.31) | 4.37E-01 | 1.00E+00 |
| rs12660136 | 6 HCRTR2 | 0.49 Dom | 0.92(0.74-1.15) | 4.77E-01 | 1.00E+00 |
| rs1364043  | 5 HTR1A  | 0.40 Dom | 0.92(0.75-1.12) | 4.01E-01 | 8.51E-01 |
| rs13361335 | 5 HTR1A  | 0.40 Dom | 0.92(0.75-1.12) | 4.01E-01 | 8.51E-01 |
| rs13436914 | 5 HTR1A  | 0.05 Add | 1.13(0.82-1.56) | 4.64E-01 | 8.76E-01 |
| rs6295     | 5 HTR1A  | 0.25 Rec | 1.09(0.73-1.61) | 6.83E-01 | 9.13E-01 |
| rs12653018 | 5 HTR1A  | 0.21 Add | 1.03(0.87-1.21) | 7.57E-01 | 9.29E-01 |
| rs6878612  | 5 HTR1A  | 0.21 Add | 1.03(0.87-1.21) | 7.57E-01 | 9.29E-01 |
| rs1423691  | 5 HTR1A  | 0.21 Add | 1.03(0.87-1.21) | 7.57E-01 | 9.29E-01 |
| rs878567   | 5 HTR1A  | 0.21 Add | 1.03(0.87-1.21) | 7.57E-01 | 9.29E-01 |
| rs6449693  | 5 HTR1A  | 0.21 Add | 1.03(0.87-1.21) | 7.57E-01 | 9.29E-01 |
| rs10042486 | 5 HTR1A  | 0.21 Add | 1.03(0.87-1.21) | 7.57E-01 | 9.29E-01 |
| rs2161615  | 5 HTR1A  | 0.21 Dom | 1.04(0.85-1.26) | 7.27E-01 | 9.84E-01 |
| rs1549274  | 5 HTR1A  | 0.21 Dom | 1.04(0.85-1.26) | 7.27E-01 | 9.84E-01 |
| rs4521432  | 5 HTR1A  | 0.21 Dom | 1.04(0.85-1.26) | 7.27E-01 | 9.84E-01 |
| rs10085024 | 5 HTR1A  | 0.21 Dom | 1.04(0.85-1.26) | 7.27E-01 | 9.84E-01 |
| rs6859392  | 5 HTR1A  | 0.21 Dom | 1.04(0.85-1.26) | 7.27E-01 | 9.84E-01 |
| rs130058   | 6 HTR1B  | 0.10 Add | 0.81(0.64-1.02) | 7.35E-02 | 8.02E-01 |
| rs10806098 | 6 HTR1B  | 0.50 Dom | 0.81(0.65-1.01) | 5.89E-02 | 8.98E-01 |
| rs6298     | 6 HTR1B  | 0.49 Dom | 0.82(0.66-1.01) | 6.57E-02 | 9.20E-01 |
| rs13192352 | 6 HTR1B  | 0.49 Dom | 0.82(0.66-1.01) | 6.57E-02 | 9.20E-01 |
| rs12173930 | 6 HTR1B  | 0.14 Dom | 0.82(0.66-1.02) | 8.12E-02 | 9.49E-01 |
| rs2226183  | 6 HTR1B  | 0.03 Add | 1.3(0.92-1.85)  | 1.42E-01 | 9.52E-01 |
| rs1213371  | 6 HTR1B  | 0.14 Rec | 0.49(0.21-1.14) | 9.98E-02 | 9.53E-01 |



|            |         |          |                 |          |          |
|------------|---------|----------|-----------------|----------|----------|
| rs1213373  | 6 HTR1B | 0.14 Rec | 0.49(0.21-1.14) | 9.98E-02 | 9.54E-01 |
| rs1213366  | 6 HTR1B | 0.14 Rec | 0.49(0.21-1.14) | 9.98E-02 | 9.54E-01 |
| rs6296     | 6 HTR1B | 0.50 Dom | 0.83(0.67-1.03) | 8.65E-02 | 9.58E-01 |
| rs12662392 | 6 HTR1B | 0.50 Rec | 1.21(0.97-1.5)  | 9.38E-02 | 9.68E-01 |
| rs10943458 | 6 HTR1B | 0.10 Add | 1.18(0.94-1.48) | 1.62E-01 | 9.68E-01 |
| rs12203487 | 6 HTR1B | 0.10 Add | 1.18(0.94-1.48) | 1.62E-01 | 9.68E-01 |
| rs2211488  | 6 HTR1B | 0.10 Add | 1.18(0.94-1.48) | 1.62E-01 | 9.68E-01 |
| rs2000292  | 6 HTR1B | 0.48 Rec | 1.2(0.96-1.5)   | 1.07E-01 | 9.78E-01 |
| rs6908090  | 6 HTR1B | 0.06 Dom | 1(0.74-1.36)    | 9.78E-01 | 9.78E-01 |
| rs9352483  | 6 HTR1B | 0.06 Dom | 1(0.74-1.36)    | 9.78E-01 | 9.78E-01 |
| rs1213368  | 6 HTR1B | 0.39 Dom | 0.86(0.7-1.04)  | 1.24E-01 | 9.80E-01 |
| rs12527143 | 6 HTR1B | 0.10 Add | 1.15(0.92-1.44) | 2.16E-01 | 9.83E-01 |
| rs4543330  | 6 HTR1B | 0.03 Add | 1.26(0.88-1.82) | 2.12E-01 | 9.83E-01 |
| rs9361235  | 6 HTR1B | 0.13 Rec | 0.52(0.22-1.22) | 1.36E-01 | 9.84E-01 |
| rs11568817 | 6 HTR1B | 0.13 Rec | 0.52(0.22-1.22) | 1.36E-01 | 9.84E-01 |
| rs17273700 | 6 HTR1B | 0.13 Rec | 0.52(0.22-1.22) | 1.36E-01 | 9.84E-01 |
| rs9361233  | 6 HTR1B | 0.13 Rec | 0.52(0.22-1.22) | 1.36E-01 | 9.84E-01 |
| rs1936158  | 6 HTR1B | 0.29 Dom | 0.87(0.72-1.05) | 1.55E-01 | 9.90E-01 |
| rs1213370  | 6 HTR1B | 0.28 Add | 0.92(0.79-1.07) | 2.78E-01 | 9.97E-01 |
| rs1213365  | 6 HTR1B | 0.27 Dom | 0.92(0.76-1.11) | 3.66E-01 | 9.97E-01 |
| rs13212041 | 6 HTR1B | 0.23 Rec | 1.05(0.69-1.59) | 8.18E-01 | 9.99E-01 |
| rs4140535  | 6 HTR1B | 0.36 Dom | 0.89(0.73-1.08) | 2.53E-01 | 9.99E-01 |
| rs9359271  | 6 HTR1B | 0.50 Rec | 0.88(0.7-1.09)  | 2.39E-01 | 9.99E-01 |
| rs6297     | 6 HTR1B | 0.11 Dom | 0.9(0.71-1.14)  | 3.83E-01 | 9.99E-01 |
| rs2143823  | 6 HTR1B | 0.23 Dom | 0.91(0.75-1.11) | 3.71E-01 | 9.99E-01 |
| rs1778258  | 6 HTR1B | 0.11 Rec | 1.47(0.74-2.91) | 2.68E-01 | 9.99E-01 |
| rs1213369  | 6 HTR1B | 0.25 Add | 0.93(0.79-1.08) | 3.36E-01 | 9.99E-01 |
| rs1228814  | 6 HTR1B | 0.19 Add | 1.01(0.85-1.2)  | 9.20E-01 | 9.99E-01 |
| rs1343491  | 6 HTR1B | 0.14 Dom | 0.95(0.77-1.19) | 6.74E-01 | 1.00E+00 |
| rs2798949  | 6 HTR1B | 0.10 Rec | 0.62(0.22-1.79) | 3.80E-01 | 1.00E+00 |
| rs9350712  | 6 HTR1B | 0.46 Rec | 1.06(0.84-1.33) | 6.35E-01 | 1.00E+00 |
| rs9352481  | 6 HTR1B | 0.46 Rec | 1.06(0.84-1.33) | 6.42E-01 | 1.00E+00 |
| rs13218546 | 6 HTR1B | 0.14 Rec | 0.84(0.44-1.6)  | 5.87E-01 | 1.00E+00 |
| rs1343485  | 6 HTR1B | 0.06 Add | 1.05(0.79-1.39) | 7.43E-01 | 1.00E+00 |

|            |          |          |                 |          |          |
|------------|----------|----------|-----------------|----------|----------|
| rs1145831  | 6 HTR1B  | 0.14 Rec | 1.17(0.64-2.13) | 6.16E-01 | 1.00E+00 |
| rs1186675  | 1 KCNJ9  | 0.05 Add | 1.37(1.02-1.85) | 3.96E-02 | 2.61E-01 |
| rs2295621  | 1 KCNJ9  | 0.22 Dom | 0.83(0.68-1.01) | 6.87E-02 | 5.48E-01 |
| rs12408242 | 1 KCNJ9  | 0.22 Dom | 0.84(0.69-1.02) | 7.48E-02 | 5.77E-01 |
| rs12401728 | 1 KCNJ9  | 0.22 Dom | 0.85(0.69-1.03) | 9.42E-02 | 6.55E-01 |
| rs11265318 | 1 KCNJ9  | 0.27 Dom | 1.12(0.92-1.35) | 2.50E-01 | 8.18E-01 |
| rs6677510  | 1 KCNJ9  | 0.27 Dom | 1.14(0.94-1.38) | 1.74E-01 | 8.24E-01 |
| rs4656876  | 1 KCNJ9  | 0.27 Dom | 1.14(0.94-1.38) | 1.78E-01 | 8.31E-01 |
| rs1321649  | 1 KCNJ9  | 0.27 Dom | 1.14(0.94-1.38) | 1.78E-01 | 8.31E-01 |
| rs2737703  | 1 KCNJ9  | 0.27 Add | 1.03(0.89-1.2)  | 6.81E-01 | 8.61E-01 |
| rs11265320 | 1 KCNJ9  | 0.32 Dom | 1.13(0.93-1.37) | 2.06E-01 | 8.61E-01 |
| rs3747619  | 1 KCNJ9  | 0.05 Add | 1.15(0.85-1.56) | 3.74E-01 | 8.73E-01 |
| rs12402888 | 1 KCNJ9  | 0.05 Add | 1.15(0.85-1.56) | 3.74E-01 | 8.73E-01 |
| rs1131891  | 1 KCNJ9  | 0.05 Add | 1.15(0.85-1.56) | 3.74E-01 | 8.73E-01 |
| rs3180694  | 1 KCNJ9  | 0.05 Add | 1.15(0.84-1.58) | 3.69E-01 | 8.81E-01 |
| rs2494211  | 1 KCNJ9  | 0.27 Dom | 1.1(0.91-1.34)  | 3.12E-01 | 8.87E-01 |
| rs2753268  | 1 KCNJ9  | 0.27 Dom | 1.1(0.91-1.33)  | 3.26E-01 | 8.99E-01 |
| rs2369406  | 1 KCNJ9  | 0.50 Rec | 0.91(0.73-1.14) | 4.18E-01 | 9.38E-01 |
| rs4656874  | 1 KCNJ9  | 0.22 Dom | 1.03(0.84-1.25) | 7.96E-01 | 9.58E-01 |
| rs10401329 | 19 KLF16 | 0.28 Dom | 1.2(0.99-1.45)  | 7.00E-02 | 5.53E-01 |
| rs4807154  | 19 KLF16 | 0.31 Rec | 1.1(0.8-1.52)   | 5.57E-01 | 5.58E-01 |
| rs12460105 | 19 KLF16 | 0.43 Add | 1.12(0.98-1.29) | 1.06E-01 | 5.83E-01 |
| rs4807152  | 19 KLF16 | 0.43 Add | 1.12(0.98-1.29) | 1.06E-01 | 5.83E-01 |
| rs1609761  | 19 KLF16 | 0.42 Dom | 1.19(0.97-1.46) | 9.90E-02 | 6.33E-01 |
| rs4806815  | 19 KLF16 | 0.30 Dom | 1.1(0.91-1.33)  | 3.23E-01 | 7.85E-01 |
| rs1609760  | 19 KLF16 | 0.23 Rec | 1.33(0.87-2.03) | 1.81E-01 | 8.11E-01 |
| rs893541   | 19 KLF16 | 0.32 Rec | 1.13(0.83-1.53) | 4.51E-01 | 8.30E-01 |
| rs893539   | 19 KLF16 | 0.23 Rec | 1.32(0.86-2.02) | 2.04E-01 | 8.42E-01 |
| rs893540   | 19 KLF16 | 0.23 Rec | 1.32(0.86-2.02) | 2.04E-01 | 8.42E-01 |
| rs4806814  | 19 KLF16 | 0.30 Rec | 0.85(0.6-1.21)  | 3.58E-01 | 8.60E-01 |
| rs3810417  | 19 KLF16 | 0.30 Dom | 1.11(0.91-1.34) | 3.03E-01 | 8.60E-01 |
| rs2298432  | 22 MAPK1 | 0.48 Dom | 1.25(1-1.55)    | 4.69E-02 | 5.41E-01 |
| rs5755074  | 22 MAPK1 | 0.14 Rec | 1.99(1.05-3.79) | 3.60E-02 | 5.41E-01 |
| rs2266967  | 22 MAPK1 | 0.44 Add | 1.15(1-1.32)    | 4.35E-02 | 5.50E-01 |

|            |          |          |                 |          |          |
|------------|----------|----------|-----------------|----------|----------|
| rs5749998  | 22 MAPK1 | 0.44 Add | 1.15(1-1.32)    | 4.35E-02 | 5.50E-01 |
| rs5749986  | 22 MAPK1 | 0.44 Add | 1.15(1-1.32)    | 4.60E-02 | 5.64E-01 |
| rs5999550  | 22 MAPK1 | 0.44 Add | 1.15(1-1.32)    | 4.57E-02 | 5.64E-01 |
| rs9607287  | 22 MAPK1 | 0.44 Add | 1.15(1-1.31)    | 4.87E-02 | 5.83E-01 |
| rs3788332  | 22 MAPK1 | 0.44 Add | 1.14(1-1.31)    | 5.61E-02 | 6.29E-01 |
| rs13943    | 22 MAPK1 | 0.43 Add | 1.13(0.99-1.3)  | 7.58E-02 | 7.32E-01 |
| rs6928     | 22 MAPK1 | 0.43 Dom | 1.16(0.94-1.42) | 1.56E-01 | 7.36E-01 |
| rs3810610  | 22 MAPK1 | 0.43 Dom | 1.16(0.94-1.42) | 1.56E-01 | 7.37E-01 |
| rs3810609  | 22 MAPK1 | 0.43 Dom | 1.16(0.94-1.42) | 1.60E-01 | 7.45E-01 |
| rs9607272  | 22 MAPK1 | 0.09 Dom | 1.06(0.83-1.36) | 6.46E-01 | 7.47E-01 |
| rs2876981  | 22 MAPK1 | 0.10 Dom | 1.05(0.82-1.35) | 6.86E-01 | 7.49E-01 |
| rs9610470  | 22 MAPK1 | 0.10 Dom | 1.06(0.83-1.36) | 6.45E-01 | 7.56E-01 |
| rs11704205 | 22 MAPK1 | 0.43 Add | 1.12(0.98-1.29) | 9.57E-02 | 8.01E-01 |
| rs2283792  | 22 MAPK1 | 0.43 Add | 1.12(0.98-1.28) | 1.03E-01 | 8.12E-01 |
| rs5755099  | 22 MAPK1 | 0.43 Add | 1.12(0.98-1.28) | 9.94E-02 | 8.13E-01 |
| rs5999521  | 22 MAPK1 | 0.43 Add | 1.12(0.98-1.28) | 1.01E-01 | 8.16E-01 |
| rs5999515  | 22 MAPK1 | 0.43 Add | 1.12(0.98-1.28) | 1.01E-01 | 8.16E-01 |
| rs1892848  | 22 MAPK1 | 0.43 Add | 1.12(0.98-1.28) | 1.06E-01 | 8.20E-01 |
| rs8136867  | 22 MAPK1 | 0.43 Dom | 1.14(0.93-1.4)  | 2.02E-01 | 8.22E-01 |
| rs2006893  | 22 MAPK1 | 0.43 Add | 1.12(0.98-1.28) | 1.09E-01 | 8.27E-01 |
| rs1892846  | 22 MAPK1 | 0.43 Add | 1.12(0.97-1.28) | 1.13E-01 | 8.38E-01 |
| rs5755694  | 22 MAPK1 | 0.43 Add | 1.12(0.97-1.28) | 1.14E-01 | 8.39E-01 |
| rs2283794  | 22 MAPK1 | 0.43 Add | 1.11(0.97-1.27) | 1.23E-01 | 8.62E-01 |
| rs2276006  | 22 MAPK1 | 0.21 Add | 1.06(0.9-1.25)  | 4.91E-01 | 8.67E-01 |
| rs5754970  | 22 MAPK1 | 0.21 Add | 1.06(0.9-1.25)  | 4.97E-01 | 8.70E-01 |
| rs13515    | 22 MAPK1 | 0.21 Add | 1.06(0.9-1.25)  | 4.96E-01 | 8.71E-01 |
| rs7290469  | 22 MAPK1 | 0.19 Add | 1.12(0.94-1.33) | 2.04E-01 | 8.79E-01 |
| rs5749811  | 22 MAPK1 | 0.21 Add | 1.06(0.89-1.25) | 5.17E-01 | 8.84E-01 |
| rs5754968  | 22 MAPK1 | 0.21 Add | 1.06(0.89-1.25) | 5.17E-01 | 8.84E-01 |
| rs4821401  | 22 MAPK1 | 0.21 Add | 1.05(0.89-1.24) | 5.38E-01 | 8.88E-01 |
| rs5749939  | 22 MAPK1 | 0.21 Add | 1.06(0.89-1.25) | 5.23E-01 | 8.88E-01 |
| rs5755040  | 22 MAPK1 | 0.21 Add | 1.06(0.89-1.25) | 5.23E-01 | 8.89E-01 |
| rs2276005  | 22 MAPK1 | 0.21 Add | 1.06(0.89-1.25) | 5.25E-01 | 8.89E-01 |
| rs7286558  | 22 MAPK1 | 0.03 Dom | 1.26(0.85-1.87) | 2.46E-01 | 8.90E-01 |

|            |          |          |                 |          |          |
|------------|----------|----------|-----------------|----------|----------|
| rs7285387  | 22 MAPK1 | 0.03 Dom | 1.26(0.85-1.87) | 2.46E-01 | 8.90E-01 |
| rs1892847  | 22 MAPK1 | 0.03 Dom | 1.26(0.85-1.87) | 2.46E-01 | 8.91E-01 |
| rs4821263  | 22 MAPK1 | 0.21 Add | 1.05(0.89-1.24) | 5.38E-01 | 8.93E-01 |
| rs2298434  | 22 MAPK1 | 0.22 Dom | 1.09(0.9-1.32)  | 3.94E-01 | 8.96E-01 |
| rs9610338  | 22 MAPK1 | 0.19 Rec | 1.22(0.72-2.05) | 4.59E-01 | 9.00E-01 |
| rs2283791  | 22 MAPK1 | 0.19 Rec | 1.22(0.72-2.05) | 4.59E-01 | 9.00E-01 |
| rs2266968  | 22 MAPK1 | 0.22 Dom | 1.09(0.89-1.32) | 4.02E-01 | 9.01E-01 |
| rs2266969  | 22 MAPK1 | 0.19 Rec | 1.21(0.72-2.04) | 4.65E-01 | 9.02E-01 |
| rs2283795  | 22 MAPK1 | 0.21 Add | 1.05(0.89-1.24) | 5.71E-01 | 9.03E-01 |
| rs4821367  | 22 MAPK1 | 0.21 Add | 1.05(0.89-1.24) | 5.61E-01 | 9.03E-01 |
| rs2266966  | 22 MAPK1 | 0.19 Rec | 1.21(0.72-2.03) | 4.71E-01 | 9.05E-01 |
| rs4821371  | 22 MAPK1 | 0.21 Add | 1.05(0.89-1.24) | 5.65E-01 | 9.05E-01 |
| rs3827303  | 22 MAPK1 | 0.21 Add | 1.05(0.89-1.24) | 5.65E-01 | 9.05E-01 |
| rs9610375  | 22 MAPK1 | 0.22 Add | 1.11(0.95-1.31) | 1.94E-01 | 9.12E-01 |
| rs9340     | 22 MAPK1 | 0.19 Rec | 1.23(0.73-2.08) | 4.32E-01 | 9.17E-01 |
| rs9610355  | 22 MAPK1 | 0.22 Rec | 1.22(0.78-1.89) | 3.81E-01 | 9.21E-01 |
| rs17821423 | 22 MAPK1 | 0.03 Dom | 1.23(0.83-1.81) | 3.10E-01 | 9.23E-01 |
| rs13058    | 22 MAPK1 | 0.03 Dom | 1.23(0.83-1.81) | 3.10E-01 | 9.23E-01 |
| rs1063311  | 22 MAPK1 | 0.19 Add | 1.1(0.92-1.3)   | 2.93E-01 | 9.26E-01 |
| rs5999752  | 22 MAPK1 | 0.19 Rec | 1.22(0.73-2.06) | 4.51E-01 | 9.26E-01 |
| rs9607298  | 22 MAPK1 | 0.19 Rec | 1.22(0.73-2.06) | 4.51E-01 | 9.26E-01 |
| rs5999749  | 22 MAPK1 | 0.19 Rec | 1.22(0.73-2.06) | 4.51E-01 | 9.26E-01 |
| rs2283793  | 22 MAPK1 | 0.19 Rec | 1.22(0.73-2.06) | 4.51E-01 | 9.26E-01 |
| rs9610374  | 22 MAPK1 | 0.19 Rec | 1.22(0.73-2.06) | 4.51E-01 | 9.26E-01 |
| rs3729910  | 22 MAPK1 | 0.03 Dom | 1.22(0.83-1.81) | 3.17E-01 | 9.27E-01 |
| rs9607285  | 22 MAPK1 | 0.19 Rec | 1.17(0.7-1.97)  | 5.46E-01 | 9.27E-01 |
| rs743409   | 22 MAPK1 | 0.46 Add | 1.09(0.95-1.24) | 2.29E-01 | 9.28E-01 |
| rs5755745  | 22 MAPK1 | 0.20 Dom | 1.06(0.87-1.3)  | 5.39E-01 | 9.36E-01 |
| rs17759568 | 22 MAPK1 | 0.10 Add | 1.12(0.89-1.41) | 3.23E-01 | 9.39E-01 |
| rs11913240 | 22 MAPK1 | 0.10 Add | 1.12(0.89-1.41) | 3.23E-01 | 9.39E-01 |
| rs9845460  | 3 NCK1   | 0.09 Add | 0.71(0.55-0.92) | 1.06E-02 | 6.45E-02 |
| rs4678275  | 3 NCK1   | 0.09 Add | 0.71(0.55-0.93) | 1.08E-02 | 6.58E-02 |
| rs835637   | 3 NCK1   | 0.09 Add | 0.72(0.56-0.93) | 1.10E-02 | 6.72E-02 |
| rs16844241 | 3 NCK1   | 0.09 Add | 0.72(0.55-0.93) | 1.21E-02 | 7.29E-02 |

|            |        |          |                 |          |          |
|------------|--------|----------|-----------------|----------|----------|
| rs12629000 | 3 NCK1 | 0.09 Add | 0.72(0.55-0.93) | 1.21E-02 | 7.30E-02 |
| rs7648198  | 3 NCK1 | 0.09 Add | 0.73(0.56-0.94) | 1.47E-02 | 8.68E-02 |
| rs835636   | 3 NCK1 | 0.09 Add | 0.73(0.57-0.94) | 1.53E-02 | 8.91E-02 |
| rs12054220 | 3 NCK1 | 0.09 Add | 0.74(0.58-0.96) | 2.13E-02 | 1.16E-01 |
| rs9824147  | 3 NCK1 | 0.11 Dom | 0.75(0.59-0.96) | 2.05E-02 | 1.76E-01 |
| rs1048145  | 3 NCK1 | 0.04 Add | 1.19(0.85-1.66) | 3.17E-01 | 3.58E-01 |
| rs17301365 | 3 NCK1 | 0.04 Add | 1.19(0.85-1.66) | 3.17E-01 | 3.58E-01 |
| rs6761993  | 3 NCK1 | 0.13 Dom | 0.81(0.64-1.02) | 7.14E-02 | 4.04E-01 |
| rs835648   | 3 NCK1 | 0.13 Dom | 0.81(0.65-1.02) | 7.78E-02 | 4.11E-01 |
| rs835634   | 3 NCK1 | 0.30 Dom | 0.89(0.74-1.08) | 2.46E-01 | 4.30E-01 |
| rs12054408 | 3 NCK1 | 0.30 Dom | 0.89(0.74-1.08) | 2.46E-01 | 4.30E-01 |
| rs835632   | 3 NCK1 | 0.30 Dom | 0.89(0.74-1.08) | 2.46E-01 | 4.30E-01 |
| rs12054219 | 3 NCK1 | 0.30 Dom | 0.89(0.74-1.08) | 2.46E-01 | 4.30E-01 |
| rs2343662  | 3 NCK1 | 0.13 Add | 0.84(0.68-1.03) | 9.83E-02 | 4.39E-01 |
| rs9818792  | 3 NCK1 | 0.13 Dom | 0.83(0.66-1.04) | 1.03E-01 | 4.65E-01 |
| rs12487901 | 3 NCK1 | 0.13 Dom | 0.83(0.66-1.04) | 1.03E-01 | 4.65E-01 |
| rs1805300  | 3 NCK1 | 0.13 Dom | 0.83(0.66-1.04) | 1.03E-01 | 4.66E-01 |
| rs4678448  | 3 NCK1 | 0.13 Dom | 0.83(0.66-1.04) | 1.03E-01 | 4.66E-01 |
| rs9859810  | 3 NCK1 | 0.13 Dom | 0.83(0.66-1.04) | 1.02E-01 | 4.68E-01 |
| rs2117009  | 3 NCK1 | 0.13 Dom | 0.83(0.66-1.04) | 1.02E-01 | 4.68E-01 |
| rs9837990  | 3 NCK1 | 0.13 Dom | 0.83(0.66-1.04) | 1.02E-01 | 4.68E-01 |
| rs9828009  | 3 NCK1 | 0.13 Dom | 0.83(0.66-1.04) | 1.02E-01 | 4.69E-01 |
| rs9881139  | 3 NCK1 | 0.13 Add | 0.85(0.69-1.04) | 1.14E-01 | 4.73E-01 |
| rs7629882  | 3 NCK1 | 0.13 Dom | 0.83(0.66-1.04) | 1.06E-01 | 4.74E-01 |
| rs9874887  | 3 NCK1 | 0.13 Dom | 0.83(0.66-1.04) | 1.06E-01 | 4.74E-01 |
| rs6439672  | 3 NCK1 | 0.13 Dom | 0.83(0.66-1.04) | 1.06E-01 | 4.74E-01 |
| rs1347209  | 3 NCK1 | 0.13 Dom | 0.83(0.66-1.04) | 1.06E-01 | 4.74E-01 |
| rs9848867  | 3 NCK1 | 0.13 Dom | 0.83(0.66-1.04) | 1.06E-01 | 4.74E-01 |
| rs9865545  | 3 NCK1 | 0.13 Dom | 0.83(0.66-1.04) | 1.06E-01 | 4.74E-01 |
| rs6797509  | 3 NCK1 | 0.13 Dom | 0.83(0.66-1.04) | 1.06E-01 | 4.74E-01 |
| rs6803618  | 3 NCK1 | 0.13 Dom | 0.83(0.66-1.04) | 1.06E-01 | 4.74E-01 |
| rs938525   | 3 NCK1 | 0.13 Dom | 0.83(0.66-1.04) | 1.06E-01 | 4.74E-01 |
| rs9827648  | 3 NCK1 | 0.13 Dom | 0.83(0.66-1.04) | 1.06E-01 | 4.74E-01 |
| rs1865149  | 3 NCK1 | 0.13 Dom | 0.83(0.66-1.04) | 1.06E-01 | 4.74E-01 |

|            |         |          |                 |          |          |
|------------|---------|----------|-----------------|----------|----------|
| rs9855314  | 3 NCK1  | 0.13 Dom | 0.83(0.66-1.04) | 1.06E-01 | 4.74E-01 |
| rs1052618  | 3 NCK1  | 0.13 Dom | 0.83(0.66-1.04) | 1.06E-01 | 4.74E-01 |
| rs9846691  | 3 NCK1  | 0.13 Dom | 0.83(0.66-1.04) | 1.06E-01 | 4.74E-01 |
| rs6786648  | 3 NCK1  | 0.13 Dom | 0.83(0.66-1.04) | 1.06E-01 | 4.74E-01 |
| rs9836807  | 3 NCK1  | 0.13 Dom | 0.83(0.66-1.04) | 1.06E-01 | 4.74E-01 |
| rs12330283 | 3 NCK1  | 0.13 Dom | 0.83(0.66-1.04) | 1.06E-01 | 4.74E-01 |
| rs2031029  | 3 NCK1  | 0.13 Dom | 0.83(0.66-1.04) | 1.06E-01 | 4.74E-01 |
| rs9859665  | 3 NCK1  | 0.13 Dom | 0.83(0.66-1.04) | 1.06E-01 | 4.74E-01 |
| rs9878464  | 3 NCK1  | 0.13 Dom | 0.83(0.66-1.04) | 1.06E-01 | 4.74E-01 |
| rs12637949 | 3 NCK1  | 0.13 Dom | 0.83(0.66-1.04) | 1.06E-01 | 4.74E-01 |
| rs6783508  | 3 NCK1  | 0.13 Dom | 0.83(0.66-1.04) | 1.06E-01 | 4.75E-01 |
| rs6771717  | 3 NCK1  | 0.13 Dom | 0.83(0.66-1.04) | 1.07E-01 | 4.78E-01 |
| rs3963921  | 3 NCK1  | 0.13 Dom | 0.83(0.66-1.04) | 1.07E-01 | 4.78E-01 |
| rs7611847  | 3 NCK1  | 0.13 Dom | 0.83(0.66-1.04) | 1.07E-01 | 4.78E-01 |
| rs3845925  | 3 NCK1  | 0.13 Dom | 0.83(0.66-1.04) | 1.07E-01 | 4.78E-01 |
| rs6786302  | 3 NCK1  | 0.13 Dom | 0.83(0.66-1.04) | 1.07E-01 | 4.78E-01 |
| rs1965109  | 3 NCK1  | 0.13 Dom | 0.83(0.66-1.04) | 1.07E-01 | 4.78E-01 |
| rs9833952  | 3 NCK1  | 0.13 Dom | 0.83(0.66-1.04) | 1.07E-01 | 4.78E-01 |
| rs1433319  | 3 NCK1  | 0.13 Dom | 0.83(0.66-1.04) | 1.07E-01 | 4.78E-01 |
| rs1433318  | 3 NCK1  | 0.13 Dom | 0.83(0.66-1.04) | 1.07E-01 | 4.78E-01 |
| rs6775389  | 3 NCK1  | 0.13 Dom | 0.83(0.66-1.04) | 1.07E-01 | 4.78E-01 |
| rs1344790  | 3 NCK1  | 0.13 Dom | 0.83(0.66-1.04) | 1.07E-01 | 4.78E-01 |
| rs835647   | 3 NCK1  | 0.13 Dom | 0.83(0.66-1.04) | 1.12E-01 | 4.91E-01 |
| rs7648817  | 3 NCK1  | 0.13 Dom | 0.83(0.66-1.05) | 1.15E-01 | 4.97E-01 |
| rs10935210 | 3 NCK1  | 0.13 Dom | 0.83(0.66-1.05) | 1.15E-01 | 4.97E-01 |
| rs3856623  | 3 NCK1  | 0.13 Dom | 0.83(0.66-1.05) | 1.16E-01 | 4.97E-01 |
| rs9289523  | 3 NCK1  | 0.13 Dom | 0.83(0.66-1.05) | 1.16E-01 | 4.97E-01 |
| rs4678274  | 3 NCK1  | 0.13 Dom | 0.83(0.66-1.05) | 1.16E-01 | 4.97E-01 |
| rs3772388  | 3 NCK1  | 0.13 Dom | 0.83(0.66-1.05) | 1.16E-01 | 4.97E-01 |
| rs3769340  | 2 NR4A2 | 0.13 Dom | 1.27(1.02-1.57) | 3.27E-02 | 3.70E-01 |
| rs13428968 | 2 NR4A2 | 0.26 Dom | 0.83(0.68-1)    | 5.56E-02 | 4.71E-01 |
| rs834834   | 2 NR4A2 | 0.43 Dom | 0.89(0.73-1.09) | 2.50E-01 | 9.43E-01 |
| rs1150144  | 2 NR4A2 | 0.43 Dom | 0.89(0.73-1.09) | 2.53E-01 | 9.45E-01 |
| rs834835   | 2 NR4A2 | 0.43 Dom | 0.89(0.73-1.09) | 2.71E-01 | 9.56E-01 |

|            |         |          |                 |          |          |
|------------|---------|----------|-----------------|----------|----------|
| rs10195293 | 2 NR4A2 | 0.33 Dom | 0.98(0.8-1.18)  | 7.98E-01 | 9.59E-01 |
| rs16840216 | 2 NR4A2 | 0.33 Dom | 0.98(0.8-1.18)  | 7.98E-01 | 9.59E-01 |
| rs1528454  | 2 NR4A2 | 0.33 Dom | 0.98(0.8-1.18)  | 7.98E-01 | 9.59E-01 |
| rs707130   | 2 NR4A2 | 0.43 Dom | 0.9(0.73-1.1)   | 2.86E-01 | 9.64E-01 |
| rs12803    | 2 NR4A2 | 0.17 Add | 1.09(0.91-1.3)  | 3.55E-01 | 9.69E-01 |
| rs834829   | 2 NR4A2 | 0.46 Dom | 0.92(0.75-1.14) | 4.46E-01 | 9.72E-01 |
| rs1150143  | 2 NR4A2 | 0.43 Rec | 0.93(0.73-1.19) | 5.68E-01 | 9.79E-01 |
| rs834830   | 2 NR4A2 | 0.46 Dom | 0.92(0.74-1.13) | 4.32E-01 | 9.81E-01 |
| rs707127   | 2 NR4A2 | 0.32 Rec | 1.08(0.79-1.47) | 6.32E-01 | 9.91E-01 |
| rs16840214 | 2 NR4A2 | 0.33 Rec | 1.05(0.78-1.42) | 7.39E-01 | 9.95E-01 |
| rs2768762  | 1 NTRK1 | 0.20 Rec | 1.95(1.17-3.25) | 1.08E-02 | 2.57E-01 |
| rs12132885 | 1 NTRK1 | 0.03 Dom | 1.45(0.99-2.14) | 5.83E-02 | 4.82E-01 |
| rs1800878  | 1 NTRK1 | 0.09 Add | 1.21(0.97-1.51) | 9.52E-02 | 6.62E-01 |
| rs6677720  | 1 NTRK1 | 0.09 Add | 1.21(0.97-1.51) | 9.52E-02 | 6.62E-01 |
| rs6334     | 1 NTRK1 | 0.33 Rec | 0.74(0.53-1.02) | 6.96E-02 | 7.02E-01 |
| rs10908523 | 1 NTRK1 | 0.06 Add | 1.21(0.91-1.61) | 1.95E-01 | 8.63E-01 |
| rs2935228  | 1 NTRK1 | 0.33 Add | 0.89(0.77-1.03) | 1.27E-01 | 8.77E-01 |
| rs2644620  | 1 NTRK1 | 0.33 Add | 0.89(0.77-1.03) | 1.27E-01 | 8.77E-01 |
| rs2986716  | 1 NTRK1 | 0.33 Add | 0.89(0.77-1.03) | 1.27E-01 | 8.77E-01 |
| rs2644621  | 1 NTRK1 | 0.33 Add | 0.89(0.77-1.03) | 1.27E-01 | 8.77E-01 |
| rs1800879  | 1 NTRK1 | 0.05 Add | 1.13(0.84-1.53) | 4.07E-01 | 9.28E-01 |
| rs6337     | 1 NTRK1 | 0.04 Dom | 1.19(0.86-1.66) | 3.00E-01 | 9.31E-01 |
| rs2274497  | 1 NTRK1 | 0.08 Add | 1.14(0.89-1.45) | 2.96E-01 | 9.33E-01 |
| rs943552   | 1 NTRK1 | 0.50 Rec | 1.02(0.82-1.27) | 8.40E-01 | 9.56E-01 |
| rs12239574 | 1 NTRK1 | 0.01 Add | 0.76(0.37-1.55) | 4.47E-01 | 9.57E-01 |
| rs2644604  | 1 NTRK1 | 0.35 Rec | 0.87(0.65-1.17) | 3.62E-01 | 9.62E-01 |
| rs1410082  | 1 NTRK1 | 0.01 Add | 0.75(0.37-1.53) | 4.27E-01 | 9.70E-01 |
| rs11264577 | 1 NTRK1 | 0.08 Add | 1.12(0.87-1.42) | 3.77E-01 | 9.71E-01 |
| rs2644596  | 1 NTRK1 | 0.41 Dom | 0.97(0.79-1.18) | 7.43E-01 | 9.86E-01 |
| rs1800880  | 1 NTRK1 | 0.49 Rec | 1.03(0.82-1.28) | 8.06E-01 | 9.91E-01 |
| rs12564129 | 1 NTRK1 | 0.50 Dom | 0.97(0.78-1.21) | 7.89E-01 | 9.99E-01 |
| rs943551   | 1 NTRK1 | 0.50 Add | 1.01(0.88-1.15) | 9.23E-01 | 9.99E-01 |
| rs10485057 | 6 OPRM1 | 0.04 Add | 0.72(0.49-1.06) | 9.41E-02 | 7.87E-01 |
| rs9282821  | 6 OPRM1 | 0.22 Rec | 1.59(1.03-2.47) | 3.79E-02 | 7.89E-01 |

|            |         |          |                 |          |          |
|------------|---------|----------|-----------------|----------|----------|
| rs610231   | 6 OPRM1 | 0.06 Add | 1.29(0.97-1.72) | 7.48E-02 | 7.93E-01 |
| rs540825   | 6 OPRM1 | 0.07 Add | 1.27(0.98-1.65) | 7.12E-02 | 7.94E-01 |
| rs2075572  | 6 OPRM1 | 0.22 Rec | 1.56(1.01-2.42) | 4.58E-02 | 8.25E-01 |
| rs9322447  | 6 OPRM1 | 0.22 Rec | 1.49(0.96-2.3)  | 7.66E-02 | 9.37E-01 |
| rs598160   | 6 OPRM1 | 0.11 Rec | 2.19(0.92-5.23) | 7.63E-02 | 9.38E-01 |
| rs613355   | 6 OPRM1 | 0.11 Rec | 2.2(0.91-5.33)  | 7.97E-02 | 9.42E-01 |
| rs3798678  | 6 OPRM1 | 0.04 Add | 0.79(0.55-1.12) | 1.83E-01 | 9.52E-01 |
| rs9478501  | 6 OPRM1 | 0.04 Add | 0.79(0.56-1.13) | 1.93E-01 | 9.59E-01 |
| rs13193545 | 6 OPRM1 | 0.02 Add | 0.73(0.45-1.19) | 2.04E-01 | 9.65E-01 |
| rs548646   | 6 OPRM1 | 0.11 Rec | 2.04(0.88-4.7)  | 9.52E-02 | 9.65E-01 |
| rs634479   | 6 OPRM1 | 0.04 Add | 0.79(0.56-1.13) | 2.06E-01 | 9.66E-01 |
| rs509544   | 6 OPRM1 | 0.04 Add | 0.8(0.56-1.14)  | 2.10E-01 | 9.68E-01 |
| rs3778146  | 6 OPRM1 | 0.04 Add | 0.8(0.56-1.14)  | 2.10E-01 | 9.68E-01 |
| rs9478503  | 6 OPRM1 | 0.04 Add | 0.8(0.56-1.14)  | 2.10E-01 | 9.68E-01 |
| rs520321   | 6 OPRM1 | 0.04 Add | 0.8(0.56-1.14)  | 2.10E-01 | 9.68E-01 |
| rs6923231  | 6 OPRM1 | 0.04 Add | 0.8(0.56-1.14)  | 2.10E-01 | 9.68E-01 |
| rs3778153  | 6 OPRM1 | 0.04 Add | 0.8(0.56-1.14)  | 2.10E-01 | 9.68E-01 |
| rs3778148  | 6 OPRM1 | 0.04 Add | 0.8(0.56-1.14)  | 2.10E-01 | 9.68E-01 |
| rs7772959  | 6 OPRM1 | 0.04 Add | 0.8(0.56-1.14)  | 2.10E-01 | 9.68E-01 |
| rs9285542  | 6 OPRM1 | 0.04 Add | 0.8(0.56-1.14)  | 2.10E-01 | 9.68E-01 |
| rs17275521 | 6 OPRM1 | 0.04 Add | 0.8(0.56-1.14)  | 2.11E-01 | 9.69E-01 |
| rs9478504  | 6 OPRM1 | 0.04 Add | 0.8(0.56-1.14)  | 2.11E-01 | 9.69E-01 |
| rs1323041  | 6 OPRM1 | 0.22 Rec | 1.42(0.92-2.2)  | 1.11E-01 | 9.77E-01 |
| rs668394   | 6 OPRM1 | 0.04 Add | 0.81(0.57-1.15) | 2.41E-01 | 9.81E-01 |
| rs1853384  | 6 OPRM1 | 0.11 Rec | 1.94(0.83-4.54) | 1.29E-01 | 9.88E-01 |
| rs618207   | 6 OPRM1 | 0.11 Rec | 1.94(0.83-4.54) | 1.29E-01 | 9.88E-01 |
| rs3778156  | 6 OPRM1 | 0.04 Dom | 0.83(0.58-1.18) | 3.01E-01 | 9.94E-01 |
| rs4870266  | 6 OPRM1 | 0.19 Rec | 1.52(0.85-2.71) | 1.58E-01 | 9.95E-01 |
| rs1323042  | 6 OPRM1 | 0.22 Rec | 1.39(0.87-2.21) | 1.69E-01 | 9.95E-01 |
| rs645027   | 6 OPRM1 | 0.11 Dom | 1.12(0.89-1.41) | 3.51E-01 | 9.97E-01 |
| rs9479757  | 6 OPRM1 | 0.05 Dom | 0.86(0.62-1.17) | 3.35E-01 | 9.98E-01 |
| rs3778152  | 6 OPRM1 | 0.10 Dom | 1(0.78-1.28)    | 9.98E-01 | 9.98E-01 |
| rs620496   | 6 OPRM1 | 0.02 Add | 0.79(0.45-1.39) | 4.10E-01 | 9.98E-01 |
| rs9479756  | 6 OPRM1 | 0.04 Add | 0.85(0.59-1.23) | 3.86E-01 | 9.98E-01 |



|            |         |          |                 |          |          |
|------------|---------|----------|-----------------|----------|----------|
| rs3798683  | 6 OPRM1 | 0.36 Dom | 0.88(0.73-1.07) | 2.16E-01 | 9.98E-01 |
| rs681243   | 6 OPRM1 | 0.11 Rec | 1.8(0.71-4.58)  | 2.15E-01 | 9.98E-01 |
| rs635522   | 6 OPRM1 | 0.02 Add | 0.79(0.45-1.41) | 4.30E-01 | 9.99E-01 |
| rs494328   | 6 OPRM1 | 0.02 Add | 0.79(0.45-1.41) | 4.30E-01 | 9.99E-01 |
| rs625109   | 6 OPRM1 | 0.02 Add | 0.79(0.45-1.41) | 4.30E-01 | 9.99E-01 |
| rs563649   | 6 OPRM1 | 0.10 Dom | 1(0.78-1.27)    | 9.70E-01 | 9.99E-01 |
| rs3778145  | 6 OPRM1 | 0.05 Dom | 0.87(0.62-1.21) | 4.03E-01 | 9.99E-01 |
| rs3778147  | 6 OPRM1 | 0.05 Dom | 0.87(0.62-1.21) | 4.03E-01 | 9.99E-01 |
| rs1461773  | 6 OPRM1 | 0.05 Dom | 0.87(0.62-1.21) | 4.03E-01 | 9.99E-01 |
| rs9479754  | 6 OPRM1 | 0.05 Dom | 0.87(0.62-1.21) | 4.03E-01 | 9.99E-01 |
| rs1381376  | 6 OPRM1 | 0.05 Dom | 0.87(0.62-1.21) | 4.03E-01 | 9.99E-01 |
| rs3778151  | 6 OPRM1 | 0.05 Dom | 0.87(0.62-1.21) | 4.03E-01 | 9.99E-01 |
| rs3823010  | 6 OPRM1 | 0.05 Dom | 0.87(0.62-1.21) | 4.03E-01 | 9.99E-01 |
| rs6927269  | 6 OPRM1 | 0.05 Dom | 0.87(0.62-1.21) | 4.03E-01 | 9.99E-01 |
| rs3778150  | 6 OPRM1 | 0.05 Dom | 0.87(0.62-1.21) | 4.03E-01 | 9.99E-01 |
| rs3778149  | 6 OPRM1 | 0.05 Dom | 0.87(0.62-1.21) | 4.03E-01 | 9.99E-01 |
| rs17209711 | 6 OPRM1 | 0.05 Dom | 0.87(0.63-1.21) | 4.08E-01 | 9.99E-01 |
| rs7748401  | 6 OPRM1 | 0.10 Add | 1(0.8-1.26)     | 9.89E-01 | 1.00E+00 |
| rs10457090 | 6 OPRM1 | 0.10 Add | 1(0.8-1.26)     | 9.89E-01 | 1.00E+00 |
| rs3778158  | 6 OPRM1 | 0.05 Dom | 0.88(0.63-1.22) | 4.37E-01 | 1.00E+00 |
| rs3778157  | 6 OPRM1 | 0.05 Dom | 0.88(0.63-1.22) | 4.37E-01 | 1.00E+00 |
| rs514980   | 6 OPRM1 | 0.06 Add | 0.9(0.66-1.21)  | 4.79E-01 | 1.00E+00 |
| rs511420   | 6 OPRM1 | 0.02 Add | 0.82(0.47-1.45) | 5.01E-01 | 1.00E+00 |
| rs645189   | 6 OPRM1 | 0.02 Add | 0.82(0.47-1.45) | 5.01E-01 | 1.00E+00 |
| rs653011   | 6 OPRM1 | 0.02 Add | 0.82(0.47-1.45) | 5.01E-01 | 1.00E+00 |
| rs607759   | 6 OPRM1 | 0.05 Dom | 0.89(0.64-1.23) | 4.66E-01 | 1.00E+00 |
| rs511435   | 6 OPRM1 | 0.05 Add | 0.9(0.66-1.23)  | 5.08E-01 | 1.00E+00 |
| rs499796   | 6 OPRM1 | 0.05 Dom | 0.89(0.64-1.23) | 4.77E-01 | 1.00E+00 |
| rs524731   | 6 OPRM1 | 0.05 Dom | 0.89(0.64-1.23) | 4.77E-01 | 1.00E+00 |
| rs12203621 | 6 OPRM1 | 0.11 Dom | 1.08(0.85-1.37) | 5.17E-01 | 1.00E+00 |
| rs599548   | 6 OPRM1 | 0.11 Dom | 1.08(0.85-1.37) | 5.17E-01 | 1.00E+00 |
| rs7773995  | 6 OPRM1 | 0.05 Dom | 0.89(0.64-1.24) | 4.96E-01 | 1.00E+00 |
| rs3778155  | 6 OPRM1 | 0.05 Dom | 0.89(0.64-1.24) | 4.96E-01 | 1.00E+00 |
| rs3798688  | 6 OPRM1 | 0.11 Dom | 1.08(0.85-1.37) | 5.28E-01 | 1.00E+00 |

|            |         |          |                 |          |          |
|------------|---------|----------|-----------------|----------|----------|
| rs9322445  | 6 OPRM1 | 0.05 Add | 0.91(0.67-1.25) | 5.75E-01 | 1.00E+00 |
| rs6936615  | 6 OPRM1 | 0.05 Add | 0.91(0.67-1.25) | 5.75E-01 | 1.00E+00 |
| rs557748   | 6 OPRM1 | 0.05 Add | 0.91(0.67-1.25) | 5.75E-01 | 1.00E+00 |
| rs477292   | 6 OPRM1 | 0.05 Add | 0.91(0.67-1.25) | 5.75E-01 | 1.00E+00 |
| rs9478506  | 6 OPRM1 | 0.05 Dom | 0.9(0.65-1.26)  | 5.46E-01 | 1.00E+00 |
| rs10485058 | 6 OPRM1 | 0.05 Dom | 0.98(0.7-1.38)  | 9.21E-01 | 1.00E+00 |
| rs495491   | 6 OPRM1 | 0.15 Rec | 1.18(0.62-2.25) | 6.17E-01 | 1.00E+00 |
| rs583664   | 6 OPRM1 | 0.09 Add | 1.04(0.82-1.31) | 7.77E-01 | 1.00E+00 |
| rs677830   | 6 OPRM1 | 0.09 Add | 1.03(0.81-1.31) | 7.82E-01 | 1.00E+00 |
| rs589046   | 6 OPRM1 | 0.15 Add | 0.96(0.79-1.16) | 6.70E-01 | 1.00E+00 |
| rs644261   | 6 OPRM1 | 0.09 Add | 1.03(0.81-1.31) | 7.89E-01 | 1.00E+00 |
| rs613341   | 6 OPRM1 | 0.02 Add | 1.11(0.7-1.78)  | 6.54E-01 | 1.00E+00 |
| rs3798676  | 6 OPRM1 | 0.10 Add | 1(0.79-1.25)    | 9.66E-01 | 1.00E+00 |
| rs648007   | 6 OPRM1 | 0.11 Rec | 1.55(0.55-4.4)  | 4.09E-01 | 1.00E+00 |
| rs558948   | 6 OPRM1 | 0.09 Dom | 1.03(0.8-1.33)  | 7.99E-01 | 1.00E+00 |
| rs676252   | 6 OPRM1 | 0.09 Add | 1.03(0.81-1.31) | 8.12E-01 | 1.00E+00 |
| rs648893   | 6 OPRM1 | 0.09 Dom | 1.03(0.8-1.32)  | 8.18E-01 | 1.00E+00 |
| rs653107   | 6 OPRM1 | 0.02 Dom | 0.93(0.55-1.56) | 7.77E-01 | 1.00E+00 |
| rs650245   | 6 OPRM1 | 0.02 Dom | 0.93(0.55-1.56) | 7.77E-01 | 1.00E+00 |
| rs617648   | 6 OPRM1 | 0.02 Dom | 0.93(0.55-1.56) | 7.77E-01 | 1.00E+00 |
| rs664247   | 6 OPRM1 | 0.02 Dom | 0.93(0.55-1.56) | 7.77E-01 | 1.00E+00 |
| rs590761   | 6 OPRM1 | 0.02 Dom | 0.93(0.55-1.56) | 7.77E-01 | 1.00E+00 |
| rs633387   | 6 OPRM1 | 0.09 Add | 1.03(0.81-1.31) | 8.06E-01 | 1.00E+00 |
| rs628618   | 6 OPRM1 | 0.02 Dom | 0.93(0.56-1.55) | 7.76E-01 | 1.00E+00 |
| rs544093   | 6 OPRM1 | 0.02 Dom | 0.93(0.56-1.55) | 7.76E-01 | 1.00E+00 |
| rs556716   | 6 OPRM1 | 0.02 Dom | 0.93(0.56-1.55) | 7.76E-01 | 1.00E+00 |
| rs616585   | 6 OPRM1 | 0.02 Dom | 0.94(0.56-1.56) | 7.99E-01 | 1.00E+00 |
| rs606148   | 6 OPRM1 | 0.02 Add | 1.07(0.67-1.72) | 7.65E-01 | 1.00E+00 |
| rs599945   | 6 OPRM1 | 0.02 Add | 1.07(0.67-1.72) | 7.65E-01 | 1.00E+00 |
| rs1799971  | 6 OPRM1 | 0.35 Add | 0.96(0.83-1.11) | 5.94E-01 | 1.00E+00 |
| rs13194785 | 6 OPRM1 | 0.09 Dom | 1.05(0.81-1.35) | 7.13E-01 | 1.00E+00 |
| rs642489   | 6 OPRM1 | 0.09 Add | 1.04(0.82-1.32) | 7.31E-01 | 1.00E+00 |
| rs9322446  | 6 OPRM1 | 0.05 Dom | 0.94(0.68-1.3)  | 7.29E-01 | 1.00E+00 |
| rs647192   | 6 OPRM1 | 0.09 Dom | 1.03(0.81-1.33) | 7.91E-01 | 1.00E+00 |

|            |          |          |                 |          |          |
|------------|----------|----------|-----------------|----------|----------|
| rs650825   | 6 OPRM1  | 0.09 Dom | 1.03(0.81-1.33) | 7.91E-01 | 1.00E+00 |
| rs606545   | 6 OPRM1  | 0.09 Dom | 1.03(0.81-1.33) | 7.91E-01 | 1.00E+00 |
| rs609148   | 6 OPRM1  | 0.09 Dom | 1.03(0.81-1.33) | 7.91E-01 | 1.00E+00 |
| rs504932   | 6 OPRM1  | 0.09 Dom | 1.03(0.81-1.33) | 7.91E-01 | 1.00E+00 |
| rs636433   | 6 OPRM1  | 0.02 Dom | 0.91(0.55-1.52) | 7.32E-01 | 1.00E+00 |
| rs649840   | 6 OPRM1  | 0.02 Dom | 0.91(0.55-1.52) | 7.32E-01 | 1.00E+00 |
| rs632395   | 6 OPRM1  | 0.02 Add | 1.09(0.68-1.73) | 7.28E-01 | 1.00E+00 |
| rs12205732 | 6 OPRM1  | 0.10 Add | 1.01(0.81-1.27) | 9.12E-01 | 1.00E+00 |
| rs6912029  | 6 OPRM1  | 0.10 Add | 1.01(0.81-1.27) | 9.12E-01 | 1.00E+00 |
| rs623956   | 6 OPRM1  | 0.09 Dom | 1.04(0.81-1.35) | 7.54E-01 | 1.00E+00 |
| rs9371776  | 6 OPRM1  | 0.01 Add | 0.97(0.49-1.88) | 9.17E-01 | 1.00E+00 |
| rs510769   | 6 OPRM1  | 0.15 Rec | 1.11(0.57-2.15) | 7.68E-01 | 1.00E+00 |
| rs12209447 | 6 OPRM1  | 0.10 Dom | 1.02(0.8-1.3)   | 8.96E-01 | 1.00E+00 |
| rs2010884  | 6 OPRM1  | 0.39 Add | 1(0.87-1.15)    | 9.66E-01 | 1.00E+00 |
| rs12210856 | 6 OPRM1  | 0.10 Dom | 0.99(0.78-1.27) | 9.55E-01 | 1.00E+00 |
| rs1883005  | 15 PAR4  | 0.30 Rec | 1.26(0.92-1.73) | 1.42E-01 | 7.63E-01 |
| rs2739765  | 15 PAR4  | 0.25 Rec | 1.17(0.8-1.7)   | 4.14E-01 | 8.04E-01 |
| rs11855532 | 15 PAR4  | 0.26 Dom | 1.13(0.93-1.37) | 2.18E-01 | 8.18E-01 |
| rs7180829  | 15 PAR4  | 0.24 Add | 1.08(0.93-1.26) | 3.23E-01 | 8.39E-01 |
| rs1883006  | 15 PAR4  | 0.29 Dom | 1.13(0.93-1.37) | 2.11E-01 | 8.57E-01 |
| rs2739768  | 15 PAR4  | 0.25 Add | 1.05(0.89-1.23) | 5.88E-01 | 9.04E-01 |
| rs2719923  | 15 PAR4  | 0.03 Dom | 1.02(0.68-1.53) | 9.34E-01 | 9.34E-01 |
| rs760973   | 22 PICK1 | 0.24 Add | 0.82(0.7-0.97)  | 1.75E-02 | 3.61E-01 |
| rs742395   | 22 PICK1 | 0.24 Add | 0.82(0.7-0.97)  | 1.75E-02 | 3.61E-01 |
| rs5756890  | 22 PICK1 | 0.24 Add | 0.82(0.7-0.97)  | 1.75E-02 | 3.61E-01 |
| rs4384887  | 22 PICK1 | 0.24 Add | 0.82(0.7-0.97)  | 1.75E-02 | 3.61E-01 |
| rs13053681 | 22 PICK1 | 0.29 Add | 1.15(0.99-1.33) | 7.54E-02 | 8.83E-01 |
| rs3948     | 22 PICK1 | 0.35 Rec | 1.01(0.76-1.35) | 9.42E-01 | 9.42E-01 |
| rs3026685  | 22 PICK1 | 0.35 Rec | 1.01(0.76-1.35) | 9.42E-01 | 9.42E-01 |
| rs742396   | 22 PICK1 | 0.28 Dom | 0.86(0.71-1.04) | 1.28E-01 | 9.59E-01 |
| rs2018980  | 22 PICK1 | 0.29 Dom | 0.87(0.71-1.05) | 1.40E-01 | 9.61E-01 |
| rs13054174 | 22 PICK1 | 0.01 Add | 0.67(0.33-1.35) | 2.62E-01 | 9.61E-01 |
| rs738443   | 22 PICK1 | 0.28 Dom | 0.86(0.71-1.04) | 1.20E-01 | 9.64E-01 |
| rs1004764  | 22 PICK1 | 0.07 Add | 0.85(0.65-1.1)  | 2.17E-01 | 9.65E-01 |

|            |          |          |                 |          |          |
|------------|----------|----------|-----------------|----------|----------|
| rs2076371  | 22 PICK1 | 0.06 Add | 0.84(0.64-1.11) | 2.16E-01 | 9.67E-01 |
| rs2076369  | 22 PICK1 | 0.28 Dom | 0.86(0.71-1.04) | 1.24E-01 | 9.68E-01 |
| rs6000991  | 22 PICK1 | 0.28 Dom | 0.86(0.71-1.04) | 1.24E-01 | 9.68E-01 |
| rs2076370  | 22 PICK1 | 0.28 Dom | 0.86(0.71-1.04) | 1.24E-01 | 9.68E-01 |
| rs4821735  | 22 PICK1 | 0.28 Dom | 0.86(0.71-1.04) | 1.24E-01 | 9.68E-01 |
| rs3026688  | 22 PICK1 | 0.23 Add | 1.11(0.95-1.31) | 1.92E-01 | 9.69E-01 |
| rs5756908  | 22 PICK1 | 0.47 Add | 0.92(0.8-1.05)  | 2.18E-01 | 9.87E-01 |
| rs2235573  | 22 PICK1 | 0.47 Add | 0.92(0.8-1.05)  | 2.11E-01 | 9.89E-01 |
| rs4821733  | 22 PICK1 | 0.38 Add | 0.92(0.8-1.06)  | 2.63E-01 | 9.89E-01 |
| rs2267366  | 22 PICK1 | 0.15 Dom | 1.15(0.93-1.42) | 1.97E-01 | 9.90E-01 |
| rs3952     | 22 PICK1 | 0.35 Dom | 1.03(0.85-1.26) | 7.28E-01 | 9.94E-01 |
| rs6000987  | 22 PICK1 | 0.04 Add | 0.87(0.61-1.26) | 4.72E-01 | 9.95E-01 |
| rs760975   | 22 PICK1 | 0.19 Dom | 0.9(0.74-1.1)   | 3.08E-01 | 9.96E-01 |
| rs737662   | 22 PICK1 | 0.35 Rec | 1.01(0.76-1.36) | 9.24E-01 | 9.98E-01 |
| rs8142185  | 22 PICK1 | 0.35 Rec | 1.01(0.76-1.36) | 9.24E-01 | 9.98E-01 |
| rs2076372  | 22 PICK1 | 0.37 Dom | 1.05(0.86-1.28) | 6.25E-01 | 9.99E-01 |
| rs2012859  | 22 PICK1 | 0.36 Rec | 1.06(0.8-1.42)  | 6.84E-01 | 9.99E-01 |
| rs8135665  | 22 PICK1 | 0.11 Rec | 0.93(0.32-2.71) | 8.89E-01 | 9.99E-01 |
| rs3026681  | 22 PICK1 | 0.01 Add | 0.96(0.54-1.71) | 8.82E-01 | 1.00E+00 |
| rs4821732  | 22 PICK1 | 0.04 Add | 1.05(0.74-1.49) | 7.97E-01 | 1.00E+00 |
| rs12473543 | 2 POMC   | 0.39 Rec | 1.06(0.82-1.37) | 6.79E-01 | 8.95E-01 |
| rs1561289  | 2 POMC   | 0.29 Dom | 0.88(0.73-1.07) | 2.09E-01 | 9.68E-01 |
| rs3769671  | 2 POMC   | 0.06 Dom | 1.04(0.77-1.41) | 7.97E-01 | 9.80E-01 |
| rs13428823 | 2 POMC   | 0.30 Dom | 0.9(0.74-1.08)  | 2.59E-01 | 9.82E-01 |
| rs7605927  | 2 POMC   | 0.39 Rec | 1.06(0.81-1.38) | 6.74E-01 | 9.84E-01 |
| rs3731634  | 2 POMC   | 0.33 Dom | 1.07(0.88-1.3)  | 4.92E-01 | 9.84E-01 |
| rs934778   | 2 POMC   | 0.12 Dom | 1.14(0.91-1.44) | 2.50E-01 | 9.87E-01 |
| rs6713532  | 2 POMC   | 0.39 Dom | 1.04(0.85-1.27) | 6.95E-01 | 9.87E-01 |
| rs7565877  | 2 POMC   | 0.05 Dom | 1.05(0.77-1.44) | 7.49E-01 | 9.89E-01 |
| rs6545975  | 2 POMC   | 0.39 Rec | 1.07(0.83-1.39) | 6.06E-01 | 9.89E-01 |
| rs3795955  | 2 POMC   | 0.26 Dom | 0.9(0.74-1.1)   | 3.05E-01 | 9.91E-01 |
| rs874401   | 2 POMC   | 0.18 Add | 0.95(0.8-1.14)  | 6.06E-01 | 9.93E-01 |
| rs4665773  | 2 POMC   | 0.18 Add | 0.95(0.8-1.14)  | 6.06E-01 | 9.93E-01 |
| rs4665771  | 2 POMC   | 0.18 Add | 0.95(0.8-1.14)  | 6.06E-01 | 9.93E-01 |

|            |            |          |                 |          |          |
|------------|------------|----------|-----------------|----------|----------|
| rs4665775  | 2 POMC     | 0.18 Add | 0.95(0.8-1.14)  | 6.06E-01 | 9.93E-01 |
| rs4665774  | 2 POMC     | 0.18 Add | 0.95(0.8-1.14)  | 6.06E-01 | 9.93E-01 |
| rs1866146  | 2 POMC     | 0.39 Rec | 1.04(0.8-1.36)  | 7.46E-01 | 9.93E-01 |
| rs2118404  | 2 POMC     | 0.39 Dom | 1.03(0.85-1.26) | 7.65E-01 | 9.94E-01 |
| rs6545976  | 2 POMC     | 0.09 Add | 0.92(0.72-1.18) | 5.27E-01 | 9.95E-01 |
| rs6719226  | 2 POMC     | 0.09 Add | 0.92(0.72-1.18) | 5.27E-01 | 9.95E-01 |
| rs1877032  | 17 PPP1R1B | 0.02 Add | 1.43(0.92-2.22) | 1.13E-01 | 3.70E-01 |
| rs2271309  | 17 PPP1R1B | 0.44 Rec | 0.93(0.73-1.18) | 5.40E-01 | 8.80E-01 |
| rs1874228  | 17 PPP1R1B | 0.44 Dom | 0.95(0.77-1.16) | 6.12E-01 | 8.99E-01 |
| rs879606   | 17 PPP1R1B | 0.44 Add | 0.96(0.84-1.1)  | 5.41E-01 | 9.55E-01 |
| rs9972882  | 17 PPP1R1B | 0.41 Dom | 0.98(0.8-1.19)  | 8.16E-01 | 9.65E-01 |
| rs3764352  | 17 PPP1R1B | 0.44 Add | 0.96(0.84-1.1)  | 5.82E-01 | 9.70E-01 |
| rs907094   | 17 PPP1R1B | 0.44 Add | 0.97(0.84-1.11) | 6.09E-01 | 9.80E-01 |
| rs1495099  | 17 PPP1R1B | 0.44 Add | 0.97(0.84-1.11) | 6.16E-01 | 9.81E-01 |
| rs9915323  | 17 PPP1R1B | 0.45 Dom | 0.99(0.8-1.22)  | 9.12E-01 | 9.96E-01 |
| rs12453682 | 17 PPP1R1B | 0.43 Dom | 0.99(0.81-1.22) | 9.51E-01 | 9.96E-01 |
| rs2237648  | 7 PRKAR2B  | 0.36 Rec | 1.41(1.08-1.85) | 1.22E-02 | 3.81E-01 |
| rs758943   | 7 PRKAR2B  | 0.36 Rec | 1.41(1.08-1.85) | 1.24E-02 | 3.87E-01 |
| rs11766415 | 7 PRKAR2B  | 0.37 Rec | 1.39(1.07-1.81) | 1.35E-02 | 4.04E-01 |
| rs257384   | 7 PRKAR2B  | 0.40 Rec | 1.32(1.02-1.71) | 3.51E-02 | 6.83E-01 |
| rs10227616 | 7 PRKAR2B  | 0.40 Rec | 1.29(1-1.67)    | 4.80E-02 | 7.79E-01 |
| rs2395836  | 7 PRKAR2B  | 0.40 Rec | 1.29(0.99-1.67) | 5.75E-02 | 8.20E-01 |
| rs2395833  | 7 PRKAR2B  | 0.45 Rec | 1.25(0.99-1.57) | 5.79E-02 | 8.21E-01 |
| rs7778076  | 7 PRKAR2B  | 0.09 Add | 0.85(0.67-1.09) | 1.99E-01 | 9.38E-01 |
| rs12154324 | 7 PRKAR2B  | 0.08 Add | 0.84(0.66-1.09) | 1.87E-01 | 9.50E-01 |
| rs11760966 | 7 PRKAR2B  | 0.09 Add | 0.86(0.67-1.1)  | 2.29E-01 | 9.60E-01 |
| rs10248105 | 7 PRKAR2B  | 0.09 Add | 0.86(0.67-1.1)  | 2.29E-01 | 9.61E-01 |
| rs1860804  | 7 PRKAR2B  | 0.09 Add | 0.86(0.67-1.1)  | 2.29E-01 | 9.61E-01 |
| rs1860805  | 7 PRKAR2B  | 0.09 Add | 0.86(0.67-1.1)  | 2.29E-01 | 9.61E-01 |
| rs11764389 | 7 PRKAR2B  | 0.09 Dom | 0.85(0.66-1.11) | 2.31E-01 | 9.62E-01 |
| rs11767753 | 7 PRKAR2B  | 0.09 Dom | 0.85(0.66-1.11) | 2.31E-01 | 9.62E-01 |
| rs257378   | 7 PRKAR2B  | 0.09 Dom | 0.86(0.66-1.11) | 2.48E-01 | 9.71E-01 |
| rs257382   | 7 PRKAR2B  | 0.09 Dom | 0.86(0.66-1.11) | 2.48E-01 | 9.71E-01 |
| rs3729877  | 7 PRKAR2B  | 0.09 Dom | 0.86(0.66-1.11) | 2.48E-01 | 9.72E-01 |

|            |           |          |                 |          |          |
|------------|-----------|----------|-----------------|----------|----------|
| rs6977868  | 7 PRKAR2B | 0.09 Dom | 0.86(0.66-1.11) | 2.48E-01 | 9.72E-01 |
| rs3779500  | 7 PRKAR2B | 0.09 Dom | 0.86(0.66-1.11) | 2.48E-01 | 9.72E-01 |
| rs257377   | 7 PRKAR2B | 0.09 Dom | 0.86(0.66-1.11) | 2.48E-01 | 9.72E-01 |
| rs6960148  | 7 PRKAR2B | 0.09 Dom | 0.86(0.66-1.11) | 2.48E-01 | 9.72E-01 |
| rs6946931  | 7 PRKAR2B | 0.09 Dom | 0.86(0.66-1.11) | 2.48E-01 | 9.72E-01 |
| rs257372   | 7 PRKAR2B | 0.09 Dom | 0.86(0.66-1.11) | 2.48E-01 | 9.72E-01 |
| rs12705405 | 7 PRKAR2B | 0.09 Dom | 0.86(0.66-1.11) | 2.48E-01 | 9.72E-01 |
| rs975935   | 7 PRKAR2B | 0.09 Dom | 0.86(0.66-1.11) | 2.48E-01 | 9.72E-01 |
| rs10253172 | 7 PRKAR2B | 0.09 Dom | 0.86(0.66-1.11) | 2.48E-01 | 9.72E-01 |
| rs257375   | 7 PRKAR2B | 0.09 Dom | 0.86(0.66-1.11) | 2.48E-01 | 9.72E-01 |
| rs3729876  | 7 PRKAR2B | 0.09 Dom | 0.86(0.66-1.11) | 2.48E-01 | 9.72E-01 |
| rs6947857  | 7 PRKAR2B | 0.09 Dom | 0.86(0.66-1.11) | 2.48E-01 | 9.72E-01 |
| rs10253291 | 7 PRKAR2B | 0.09 Dom | 0.86(0.66-1.11) | 2.48E-01 | 9.72E-01 |
| rs1981696  | 7 PRKAR2B | 0.09 Dom | 0.86(0.66-1.11) | 2.48E-01 | 9.72E-01 |
| rs257373   | 7 PRKAR2B | 0.09 Dom | 0.86(0.66-1.11) | 2.48E-01 | 9.72E-01 |
| rs6466160  | 7 PRKAR2B | 0.09 Dom | 0.86(0.66-1.11) | 2.48E-01 | 9.72E-01 |
| rs12055940 | 7 PRKAR2B | 0.09 Add | 0.87(0.68-1.11) | 2.56E-01 | 9.73E-01 |
| rs2536504  | 7 PRKAR2B | 0.31 Dom | 0.99(0.81-1.2)  | 8.92E-01 | 9.74E-01 |
| rs2191917  | 7 PRKAR2B | 0.09 Add | 0.87(0.68-1.11) | 2.54E-01 | 9.74E-01 |
| rs17153861 | 7 PRKAR2B | 0.09 Add | 0.87(0.68-1.11) | 2.54E-01 | 9.74E-01 |
| rs10235601 | 7 PRKAR2B | 0.09 Add | 0.87(0.69-1.1)  | 2.55E-01 | 9.74E-01 |
| rs2250121  | 7 PRKAR2B | 0.09 Add | 0.87(0.68-1.11) | 2.61E-01 | 9.76E-01 |
| rs2536502  | 7 PRKAR2B | 0.31 Dom | 0.98(0.81-1.19) | 8.65E-01 | 9.78E-01 |
| rs17425839 | 7 PRKAR2B | 0.09 Add | 0.87(0.68-1.11) | 2.70E-01 | 9.79E-01 |
| rs11767623 | 7 PRKAR2B | 0.09 Dom | 0.87(0.67-1.13) | 2.93E-01 | 9.84E-01 |
| rs6957586  | 7 PRKAR2B | 0.45 Rec | 1.19(0.94-1.5)  | 1.49E-01 | 9.84E-01 |
| rs2707378  | 7 PRKAR2B | 0.09 Add | 0.88(0.69-1.12) | 3.01E-01 | 9.85E-01 |
| rs3801969  | 7 PRKAR2B | 0.38 Rec | 1.21(0.93-1.57) | 1.66E-01 | 9.87E-01 |
| rs6969719  | 7 PRKAR2B | 0.42 Rec | 1.19(0.92-1.53) | 1.81E-01 | 9.91E-01 |
| rs257387   | 7 PRKAR2B | 0.09 Add | 0.88(0.7-1.12)  | 3.09E-01 | 9.92E-01 |
| rs741008   | 7 PRKAR2B | 0.39 Rec | 1.18(0.91-1.53) | 2.22E-01 | 9.96E-01 |
| rs17340577 | 7 PRKAR2B | 0.08 Add | 0.89(0.69-1.14) | 3.59E-01 | 9.97E-01 |
| rs1860803  | 7 PRKAR2B | 0.46 Dom | 1.01(0.82-1.24) | 9.47E-01 | 9.98E-01 |
| rs2536501  | 7 PRKAR2B | 0.31 Dom | 0.98(0.81-1.19) | 8.37E-01 | 9.98E-01 |

|            |           |          |                 |          |          |
|------------|-----------|----------|-----------------|----------|----------|
| rs9656136  | 7 PRKAR2B | 0.13 Dom | 0.88(0.7-1.1)   | 2.58E-01 | 9.98E-01 |
| rs7809330  | 7 PRKAR2B | 0.38 Rec | 1.15(0.88-1.51) | 2.93E-01 | 9.99E-01 |
| rs2302453  | 7 PRKAR2B | 0.37 Add | 1.07(0.93-1.23) | 3.75E-01 | 9.99E-01 |
| rs9656135  | 7 PRKAR2B | 0.18 Add | 0.93(0.78-1.11) | 4.41E-01 | 9.99E-01 |
| rs2237656  | 7 PRKAR2B | 0.37 Add | 1.06(0.92-1.22) | 4.01E-01 | 9.99E-01 |
| rs2536490  | 7 PRKAR2B | 0.05 Add | 1.12(0.81-1.56) | 4.91E-01 | 9.99E-01 |
| rs9648946  | 7 PRKAR2B | 0.39 Rec | 1.14(0.88-1.49) | 3.24E-01 | 9.99E-01 |
| rs2283037  | 7 PRKAR2B | 0.38 Rec | 1.14(0.87-1.49) | 3.44E-01 | 1.00E+00 |
| rs917760   | 7 PRKAR2B | 0.38 Rec | 1.14(0.87-1.49) | 3.44E-01 | 1.00E+00 |
| rs12705403 | 7 PRKAR2B | 0.38 Rec | 1.14(0.87-1.49) | 3.44E-01 | 1.00E+00 |
| rs12705404 | 7 PRKAR2B | 0.33 Rec | 1.04(0.77-1.41) | 7.91E-01 | 1.00E+00 |
| rs2251838  | 7 PRKAR2B | 0.32 Dom | 1.01(0.84-1.23) | 8.83E-01 | 1.00E+00 |
| rs2536508  | 7 PRKAR2B | 0.32 Rec | 1.09(0.8-1.48)  | 5.69E-01 | 1.00E+00 |
| rs1544582  | 7 PRKAR2B | 0.36 Dom | 0.91(0.75-1.11) | 3.67E-01 | 1.00E+00 |
| rs13311274 | 7 PRKAR2B | 0.47 Dom | 0.96(0.77-1.18) | 6.84E-01 | 1.00E+00 |
| rs11760261 | 7 PRKAR2B | 0.46 Rec | 1.04(0.82-1.31) | 7.49E-01 | 1.00E+00 |
| rs3801968  | 7 PRKAR2B | 0.46 Rec | 1.04(0.82-1.31) | 7.49E-01 | 1.00E+00 |
| rs2536503  | 7 PRKAR2B | 0.21 Rec | 0.93(0.6-1.45)  | 7.60E-01 | 1.00E+00 |
| rs2536505  | 7 PRKAR2B | 0.22 Rec | 0.94(0.6-1.46)  | 7.68E-01 | 1.00E+00 |
| rs10281856 | 7 PRKAR2B | 0.47 Rec | 1.05(0.84-1.33) | 6.53E-01 | 1.00E+00 |
| rs717099   | 7 PRKAR2B | 0.46 Dom | 0.91(0.74-1.12) | 3.75E-01 | 1.00E+00 |
| rs2237654  | 7 PRKAR2B | 0.39 Rec | 1.13(0.86-1.47) | 3.77E-01 | 1.00E+00 |
| rs12667954 | 7 PRKAR2B | 0.39 Rec | 1.13(0.86-1.47) | 3.77E-01 | 1.00E+00 |
| rs3735613  | 7 PRKAR2B | 0.39 Rec | 1.13(0.86-1.47) | 3.77E-01 | 1.00E+00 |
| rs6466156  | 7 PRKAR2B | 0.47 Dom | 0.97(0.79-1.2)  | 7.87E-01 | 1.00E+00 |
| rs1476878  | 7 PRKAR2B | 0.37 Dom | 0.92(0.76-1.12) | 4.04E-01 | 1.00E+00 |
| rs6466157  | 7 PRKAR2B | 0.38 Rec | 1.13(0.86-1.48) | 3.82E-01 | 1.00E+00 |
| rs257376   | 7 PRKAR2B | 0.47 Dom | 0.91(0.74-1.13) | 3.86E-01 | 1.00E+00 |
| rs2237649  | 7 PRKAR2B | 0.37 Dom | 0.93(0.76-1.13) | 4.49E-01 | 1.00E+00 |
| rs2536495  | 7 PRKAR2B | 0.37 Dom | 0.94(0.77-1.14) | 5.03E-01 | 1.00E+00 |
| rs1476879  | 7 PRKAR2B | 0.37 Dom | 0.94(0.77-1.14) | 5.03E-01 | 1.00E+00 |
| rs2536492  | 7 PRKAR2B | 0.36 Dom | 0.92(0.76-1.12) | 4.12E-01 | 1.00E+00 |
| rs997381   | 7 PRKAR2B | 0.36 Dom | 0.92(0.76-1.12) | 4.12E-01 | 1.00E+00 |
| rs2237652  | 7 PRKAR2B | 0.38 Rec | 1.11(0.85-1.46) | 4.52E-01 | 1.00E+00 |

|            |           |          |                 |          |          |
|------------|-----------|----------|-----------------|----------|----------|
| rs2707374  | 7 PRKAR2B | 0.21 Add | 0.96(0.82-1.14) | 6.62E-01 | 1.00E+00 |
| rs2244846  | 7 PRKAR2B | 0.37 Dom | 0.93(0.77-1.13) | 4.76E-01 | 1.00E+00 |
| rs2299419  | 7 PRKAR2B | 0.21 Rec | 0.92(0.59-1.45) | 7.30E-01 | 1.00E+00 |
| rs10249401 | 7 PRKAR2B | 0.21 Rec | 0.92(0.59-1.45) | 7.30E-01 | 1.00E+00 |
| rs6955387  | 7 PRKAR2B | 0.47 Add | 1.01(0.88-1.15) | 9.22E-01 | 1.00E+00 |
| rs2237650  | 7 PRKAR2B | 0.37 Dom | 0.92(0.76-1.12) | 4.26E-01 | 1.00E+00 |
| rs12674011 | 7 PRKAR2B | 0.40 Rec | 1.11(0.85-1.45) | 4.29E-01 | 1.00E+00 |
| rs6960842  | 7 PRKAR2B | 0.40 Dom | 0.93(0.77-1.14) | 5.01E-01 | 1.00E+00 |
| rs10487268 | 7 PRKAR2B | 0.02 Add | 1.12(0.65-1.92) | 6.86E-01 | 1.00E+00 |
| rs16877691 | 5 SLC6A3  | 0.01 Add | 1.81(1.01-3.22) | 4.44E-02 | 6.30E-01 |
| rs2270912  | 5 SLC6A3  | 0.01 Add | 1.81(1.01-3.22) | 4.50E-02 | 6.33E-01 |
| rs8179029  | 5 SLC6A3  | 0.07 Add | 0.8(0.6-1.07)   | 1.30E-01 | 9.44E-01 |
| rs6869645  | 5 SLC6A3  | 0.02 Add | 1.37(0.87-2.17) | 1.75E-01 | 9.75E-01 |
| rs2078247  | 5 SLC6A3  | 0.12 Rec | 0.45(0.17-1.24) | 1.23E-01 | 9.78E-01 |
| rs3776512  | 5 SLC6A3  | 0.07 Add | 0.83(0.63-1.09) | 1.82E-01 | 9.80E-01 |
| rs3776511  | 5 SLC6A3  | 0.07 Add | 0.83(0.63-1.09) | 1.82E-01 | 9.80E-01 |
| rs2550948  | 5 SLC6A3  | 0.13 Rec | 0.5(0.21-1.21)  | 1.23E-01 | 9.81E-01 |
| rs2937639  | 5 SLC6A3  | 0.13 Rec | 0.5(0.21-1.21)  | 1.23E-01 | 9.81E-01 |
| rs11133762 | 5 SLC6A3  | 0.39 Dom | 0.85(0.69-1.03) | 9.76E-02 | 9.81E-01 |
| rs6347     | 5 SLC6A3  | 0.11 Dom | 0.98(0.78-1.24) | 8.69E-01 | 9.83E-01 |
| rs11564767 | 5 SLC6A3  | 0.03 Add | 1.3(0.87-1.93)  | 2.01E-01 | 9.89E-01 |
| rs2550956  | 5 SLC6A3  | 0.12 Rec | 0.51(0.2-1.29)  | 1.56E-01 | 9.93E-01 |
| rs11564773 | 5 SLC6A3  | 0.02 Add | 1.31(0.82-2.09) | 2.66E-01 | 9.93E-01 |
| rs2975226  | 5 SLC6A3  | 0.13 Rec | 0.51(0.2-1.31)  | 1.60E-01 | 9.94E-01 |
| rs12652860 | 5 SLC6A3  | 0.40 Dom | 1.01(0.83-1.23) | 9.35E-01 | 9.96E-01 |
| rs37022    | 5 SLC6A3  | 0.48 Rec | 1.05(0.84-1.31) | 6.80E-01 | 9.99E-01 |
| rs27074    | 5 SLC6A3  | 0.40 Dom | 1.14(0.93-1.39) | 2.14E-01 | 9.99E-01 |
| rs3863145  | 5 SLC6A3  | 0.05 Add | 0.88(0.64-1.19) | 3.95E-01 | 1.00E+00 |
| rs6350     | 5 SLC6A3  | 0.01 Add | 1.25(0.71-2.22) | 4.35E-01 | 1.00E+00 |
| rs11564753 | 5 SLC6A3  | 0.39 Rec | 1.16(0.89-1.51) | 2.68E-01 | 1.00E+00 |
| rs6413429  | 5 SLC6A3  | 0.01 Add | 0.96(0.53-1.73) | 8.94E-01 | 1.00E+00 |
| rs11133767 | 5 SLC6A3  | 0.09 Dom | 0.92(0.71-1.19) | 5.11E-01 | 1.00E+00 |
| rs2652511  | 5 SLC6A3  | 0.15 Rec | 0.7(0.35-1.41)  | 3.18E-01 | 1.00E+00 |
| rs2975292  | 5 SLC6A3  | 0.11 Dom | 0.98(0.78-1.24) | 8.85E-01 | 1.00E+00 |



|            |          |          |                 |          |          |
|------------|----------|----------|-----------------|----------|----------|
| rs458334   | 5 SLC6A3 | 0.36 Rec | 0.96(0.73-1.28) | 7.98E-01 | 1.00E+00 |
| rs250686   | 5 SLC6A3 | 0.36 Rec | 0.96(0.73-1.28) | 7.98E-01 | 1.00E+00 |
| rs464049   | 5 SLC6A3 | 0.36 Rec | 0.96(0.73-1.28) | 7.98E-01 | 1.00E+00 |
| rs250681   | 5 SLC6A3 | 0.36 Rec | 0.96(0.73-1.28) | 7.98E-01 | 1.00E+00 |
| rs456774   | 5 SLC6A3 | 0.47 Dom | 0.9(0.73-1.11)  | 3.44E-01 | 1.00E+00 |
| rs12654851 | 5 SLC6A3 | 0.46 Rec | 1.06(0.84-1.34) | 6.18E-01 | 1.00E+00 |
| rs3756450  | 5 SLC6A3 | 0.46 Rec | 1.06(0.84-1.34) | 6.35E-01 | 1.00E+00 |
| rs40358    | 5 SLC6A3 | 0.38 Dom | 0.97(0.8-1.18)  | 7.75E-01 | 1.00E+00 |
| rs420422   | 5 SLC6A3 | 0.34 Dom | 0.94(0.78-1.14) | 5.53E-01 | 1.00E+00 |
| rs460000   | 5 SLC6A3 | 0.46 Add | 0.95(0.83-1.09) | 4.68E-01 | 1.00E+00 |
| rs464528   | 5 SLC6A3 | 0.47 Add | 0.95(0.83-1.09) | 4.76E-01 | 1.00E+00 |
| rs393795   | 5 SLC6A3 | 0.47 Add | 0.95(0.83-1.09) | 4.76E-01 | 1.00E+00 |
| rs250682   | 5 SLC6A3 | 0.47 Add | 0.95(0.83-1.09) | 4.76E-01 | 1.00E+00 |
| rs409588   | 5 SLC6A3 | 0.47 Add | 0.95(0.83-1.09) | 4.76E-01 | 1.00E+00 |
| rs460700   | 5 SLC6A3 | 0.47 Add | 0.95(0.83-1.09) | 4.76E-01 | 1.00E+00 |
| rs458860   | 5 SLC6A3 | 0.47 Add | 0.95(0.83-1.09) | 4.76E-01 | 1.00E+00 |
| rs464061   | 5 SLC6A3 | 0.47 Add | 0.95(0.83-1.09) | 4.76E-01 | 1.00E+00 |
| rs456082   | 5 SLC6A3 | 0.47 Dom | 0.92(0.75-1.14) | 4.48E-01 | 1.00E+00 |
| rs2652510  | 5 SLC6A3 | 0.14 Rec | 0.72(0.35-1.5)  | 3.86E-01 | 1.00E+00 |
| rs37020    | 5 SLC6A3 | 0.36 Rec | 0.96(0.72-1.27) | 7.54E-01 | 1.00E+00 |
| rs1042098  | 5 SLC6A3 | 0.08 Add | 0.94(0.73-1.21) | 6.33E-01 | 1.00E+00 |
| rs10052016 | 5 SLC6A3 | 0.11 Add | 0.95(0.76-1.17) | 6.02E-01 | 1.00E+00 |
| rs10053602 | 5 SLC6A3 | 0.11 Add | 0.95(0.76-1.17) | 6.02E-01 | 1.00E+00 |
| rs10040882 | 5 SLC6A3 | 0.11 Rec | 0.77(0.34-1.72) | 5.21E-01 | 1.00E+00 |
| rs10064525 | 5 SLC6A3 | 0.06 Dom | 0.93(0.69-1.26) | 6.58E-01 | 1.00E+00 |
| rs403636   | 5 SLC6A3 | 0.34 Dom | 0.93(0.77-1.13) | 4.76E-01 | 1.00E+00 |
| rs40184    | 5 SLC6A3 | 0.25 Rec | 0.87(0.58-1.31) | 4.99E-01 | 1.00E+00 |
| rs2042449  | 5 SLC6A3 | 0.11 Rec | 0.75(0.32-1.75) | 5.00E-01 | 1.00E+00 |
| rs3822090  | 4 SNCA   | 0.46 Add | 0.86(0.75-0.99) | 2.95E-02 | 3.89E-01 |
| rs3775439  | 4 SNCA   | 0.46 Add | 0.86(0.75-0.99) | 3.24E-02 | 4.19E-01 |
| rs10002435 | 4 SNCA   | 0.20 Rec | 1.74(1.07-2.83) | 2.51E-02 | 4.47E-01 |
| rs17016168 | 4 SNCA   | 0.20 Rec | 1.74(1.07-2.83) | 2.51E-02 | 4.47E-01 |
| rs10014396 | 4 SNCA   | 0.20 Rec | 1.74(1.07-2.83) | 2.51E-02 | 4.48E-01 |
| rs356164   | 4 SNCA   | 0.08 Dom | 0.77(0.58-1.01) | 5.93E-02 | 4.72E-01 |

|            |        |          |                 |          |          |
|------------|--------|----------|-----------------|----------|----------|
| rs2737029  | 4 SNCA | 0.46 Add | 0.87(0.76-1)    | 4.45E-02 | 4.81E-01 |
| rs17016183 | 4 SNCA | 0.20 Rec | 1.71(1.06-2.78) | 2.88E-02 | 4.84E-01 |
| rs6829514  | 4 SNCA | 0.20 Rec | 1.71(1.06-2.78) | 2.88E-02 | 4.84E-01 |
| rs3775447  | 4 SNCA | 0.20 Rec | 1.71(1.06-2.78) | 2.88E-02 | 4.84E-01 |
| rs3889917  | 4 SNCA | 0.20 Rec | 1.71(1.06-2.78) | 2.88E-02 | 4.84E-01 |
| rs7689942  | 4 SNCA | 0.20 Rec | 1.71(1.06-2.78) | 2.88E-02 | 4.84E-01 |
| rs3775448  | 4 SNCA | 0.20 Rec | 1.71(1.06-2.78) | 2.88E-02 | 4.84E-01 |
| rs3756057  | 4 SNCA | 0.20 Rec | 1.71(1.06-2.78) | 2.88E-02 | 4.84E-01 |
| rs3775443  | 4 SNCA | 0.20 Rec | 1.71(1.06-2.78) | 2.88E-02 | 4.84E-01 |
| rs17016190 | 4 SNCA | 0.20 Rec | 1.71(1.06-2.78) | 2.88E-02 | 4.85E-01 |
| rs17016255 | 4 SNCA | 0.20 Rec | 1.71(1.06-2.78) | 2.88E-02 | 4.85E-01 |
| rs3775461  | 4 SNCA | 0.20 Rec | 1.71(1.06-2.78) | 2.88E-02 | 4.85E-01 |
| rs7684892  | 4 SNCA | 0.20 Rec | 1.71(1.06-2.78) | 2.88E-02 | 4.85E-01 |
| rs3756056  | 4 SNCA | 0.20 Rec | 1.71(1.06-2.78) | 2.88E-02 | 4.85E-01 |
| rs2035268  | 4 SNCA | 0.20 Rec | 1.71(1.06-2.78) | 2.88E-02 | 4.85E-01 |
| rs7684637  | 4 SNCA | 0.20 Rec | 1.71(1.06-2.78) | 2.88E-02 | 4.86E-01 |
| rs3906824  | 4 SNCA | 0.20 Rec | 1.71(1.06-2.78) | 2.88E-02 | 4.86E-01 |
| rs3775446  | 4 SNCA | 0.20 Rec | 1.71(1.06-2.78) | 2.88E-02 | 4.86E-01 |
| rs3889916  | 4 SNCA | 0.20 Rec | 1.71(1.06-2.78) | 2.88E-02 | 4.86E-01 |
| rs3775429  | 4 SNCA | 0.07 Dom | 0.77(0.57-1.02) | 7.04E-02 | 5.17E-01 |
| rs10516845 | 4 SNCA | 0.46 Add | 0.87(0.76-0.99) | 4.12E-02 | 5.43E-01 |
| rs7690873  | 4 SNCA | 0.46 Add | 0.87(0.76-0.99) | 4.12E-02 | 5.43E-01 |
| rs3796661  | 4 SNCA | 0.46 Add | 0.87(0.76-0.99) | 4.12E-02 | 5.44E-01 |
| rs6834765  | 4 SNCA | 0.46 Add | 0.87(0.76-0.99) | 4.12E-02 | 5.44E-01 |
| rs6532191  | 4 SNCA | 0.13 Dom | 0.79(0.63-0.99) | 4.51E-02 | 5.57E-01 |
| rs1471483  | 4 SNCA | 0.13 Dom | 0.8(0.63-1)     | 5.10E-02 | 5.98E-01 |
| rs356186   | 4 SNCA | 0.13 Dom | 0.8(0.64-1)     | 5.43E-02 | 6.19E-01 |
| rs2572318  | 4 SNCA | 0.13 Dom | 0.8(0.64-1)     | 5.43E-02 | 6.20E-01 |
| rs2197120  | 4 SNCA | 0.13 Dom | 0.8(0.64-1)     | 5.43E-02 | 6.20E-01 |
| rs2619368  | 4 SNCA | 0.13 Dom | 0.8(0.64-1)     | 5.43E-02 | 6.20E-01 |
| rs11931074 | 4 SNCA | 0.47 Add | 0.88(0.77-1.01) | 6.12E-02 | 6.40E-01 |
| rs7687945  | 4 SNCA | 0.13 Dom | 0.8(0.64-1.01)  | 5.84E-02 | 6.43E-01 |
| rs1372522  | 4 SNCA | 0.13 Dom | 0.8(0.64-1.01)  | 5.84E-02 | 6.44E-01 |
| rs2619355  | 4 SNCA | 0.13 Dom | 0.81(0.64-1.01) | 6.41E-02 | 6.44E-01 |

|            |        |          |                 |          |          |
|------------|--------|----------|-----------------|----------|----------|
| rs7681440  | 4 SNCA | 0.13 Dom | 0.8(0.64-1.01)  | 5.84E-02 | 6.44E-01 |
| rs2301134  | 4 SNCA | 0.13 Dom | 0.8(0.64-1.01)  | 5.84E-02 | 6.44E-01 |
| rs1372519  | 4 SNCA | 0.13 Dom | 0.8(0.64-1.01)  | 5.84E-02 | 6.44E-01 |
| rs2583979  | 4 SNCA | 0.13 Dom | 0.81(0.64-1.01) | 6.41E-02 | 6.44E-01 |
| rs1811442  | 4 SNCA | 0.13 Dom | 0.81(0.64-1.01) | 6.41E-02 | 6.44E-01 |
| rs3113355  | 4 SNCA | 0.13 Dom | 0.81(0.64-1.01) | 6.41E-02 | 6.44E-01 |
| rs356191   | 4 SNCA | 0.14 Dom | 0.81(0.65-1.01) | 6.25E-02 | 6.45E-01 |
| rs2619356  | 4 SNCA | 0.13 Dom | 0.81(0.64-1.01) | 6.41E-02 | 6.45E-01 |
| rs2583968  | 4 SNCA | 0.13 Dom | 0.81(0.64-1.01) | 6.41E-02 | 6.45E-01 |
| rs2583978  | 4 SNCA | 0.13 Dom | 0.81(0.64-1.01) | 6.41E-02 | 6.45E-01 |
| rs2583975  | 4 SNCA | 0.13 Dom | 0.81(0.64-1.01) | 6.41E-02 | 6.45E-01 |
| rs356188   | 4 SNCA | 0.14 Dom | 0.81(0.65-1.01) | 6.25E-02 | 6.46E-01 |
| rs1471484  | 4 SNCA | 0.13 Dom | 0.8(0.64-1.01)  | 6.51E-02 | 6.48E-01 |
| rs3775423  | 4 SNCA | 0.47 Add | 0.88(0.77-1.01) | 6.44E-02 | 6.51E-01 |
| rs356204   | 4 SNCA | 0.41 Add | 0.88(0.77-1.01) | 6.45E-02 | 6.52E-01 |
| rs356198   | 4 SNCA | 0.08 Dom | 0.8(0.61-1.05)  | 1.06E-01 | 6.57E-01 |
| rs356220   | 4 SNCA | 0.47 Add | 0.88(0.77-1.01) | 6.52E-02 | 6.57E-01 |
| rs10003708 | 4 SNCA | 0.47 Add | 0.88(0.77-1.01) | 6.52E-02 | 6.57E-01 |
| rs7655792  | 4 SNCA | 0.47 Add | 0.88(0.77-1.01) | 6.52E-02 | 6.57E-01 |
| rs10033209 | 4 SNCA | 0.47 Add | 0.88(0.77-1.01) | 6.55E-02 | 6.58E-01 |
| rs3857052  | 4 SNCA | 0.47 Add | 0.88(0.77-1.01) | 6.65E-02 | 6.63E-01 |
| rs7436973  | 4 SNCA | 0.47 Add | 0.88(0.77-1.01) | 6.65E-02 | 6.64E-01 |
| rs3857051  | 4 SNCA | 0.47 Add | 0.88(0.77-1.01) | 6.65E-02 | 6.64E-01 |
| rs3857059  | 4 SNCA | 0.47 Add | 0.88(0.77-1.01) | 6.87E-02 | 6.74E-01 |
| rs3775424  | 4 SNCA | 0.47 Add | 0.88(0.77-1.01) | 6.87E-02 | 6.74E-01 |
| rs3857057  | 4 SNCA | 0.47 Add | 0.88(0.77-1.01) | 6.87E-02 | 6.74E-01 |
| rs3756054  | 4 SNCA | 0.47 Add | 0.88(0.77-1.01) | 6.87E-02 | 6.75E-01 |
| rs7661330  | 4 SNCA | 0.47 Add | 0.88(0.77-1.01) | 7.11E-02 | 6.86E-01 |
| rs1442144  | 4 SNCA | 0.13 Dom | 0.81(0.64-1.02) | 7.33E-02 | 6.88E-01 |
| rs17016071 | 4 SNCA | 0.47 Add | 0.88(0.77-1.01) | 7.48E-02 | 6.91E-01 |
| rs8180209  | 4 SNCA | 0.47 Add | 0.88(0.77-1.01) | 7.48E-02 | 6.92E-01 |
| rs7675290  | 4 SNCA | 0.47 Add | 0.88(0.77-1.01) | 7.48E-02 | 6.92E-01 |
| rs8180214  | 4 SNCA | 0.47 Add | 0.88(0.77-1.01) | 7.48E-02 | 6.92E-01 |
| rs356168   | 4 SNCA | 0.41 Add | 0.88(0.77-1.01) | 7.63E-02 | 6.96E-01 |

|            |        |          |                 |          |          |
|------------|--------|----------|-----------------|----------|----------|
| rs10005233 | 4 SNCA | 0.13 Dom | 0.81(0.65-1.02) | 7.63E-02 | 6.99E-01 |
| rs1837891  | 4 SNCA | 0.13 Dom | 0.81(0.65-1.02) | 7.63E-02 | 6.99E-01 |
| rs356200   | 4 SNCA | 0.41 Add | 0.89(0.77-1.02) | 8.39E-02 | 7.28E-01 |
| rs2736990  | 4 SNCA | 0.41 Add | 0.89(0.77-1.02) | 8.39E-02 | 7.29E-01 |
| rs356221   | 4 SNCA | 0.41 Add | 0.89(0.77-1.02) | 8.56E-02 | 7.34E-01 |
| rs7681815  | 4 SNCA | 0.47 Add | 0.89(0.78-1.02) | 1.00E-01 | 7.66E-01 |
| rs7681312  | 4 SNCA | 0.47 Add | 0.89(0.78-1.02) | 1.00E-01 | 7.66E-01 |
| rs356219   | 4 SNCA | 0.47 Add | 0.89(0.78-1.02) | 1.00E-01 | 7.66E-01 |
| rs356203   | 4 SNCA | 0.47 Dom | 0.87(0.7-1.07)  | 1.88E-01 | 7.69E-01 |
| rs356165   | 4 SNCA | 0.47 Add | 0.89(0.78-1.02) | 1.04E-01 | 7.76E-01 |
| rs10011157 | 4 SNCA | 0.12 Dom | 0.83(0.66-1.05) | 1.20E-01 | 8.01E-01 |
| rs17795208 | 4 SNCA | 0.06 Dom | 0.97(0.72-1.3)  | 8.21E-01 | 8.21E-01 |
| rs17016188 | 4 SNCA | 0.35 Dom | 1.08(0.89-1.31) | 4.52E-01 | 8.31E-01 |
| rs17016235 | 4 SNCA | 0.35 Dom | 1.09(0.9-1.32)  | 3.84E-01 | 8.39E-01 |
| rs11097238 | 4 SNCA | 0.33 Dom | 0.92(0.76-1.11) | 3.93E-01 | 8.41E-01 |
| rs7356297  | 4 SNCA | 0.33 Dom | 0.92(0.76-1.11) | 3.93E-01 | 8.41E-01 |
| rs2870028  | 4 SNCA | 0.33 Dom | 0.91(0.75-1.11) | 3.59E-01 | 8.77E-01 |
| rs10009760 | 4 SNCA | 0.33 Dom | 0.91(0.75-1.11) | 3.59E-01 | 8.77E-01 |
| rs11097234 | 4 SNCA | 0.33 Add | 0.92(0.8-1.06)  | 2.44E-01 | 8.84E-01 |
| rs12502363 | 4 SNCA | 0.33 Add | 0.92(0.8-1.06)  | 2.44E-01 | 8.84E-01 |
| rs3775450  | 4 SNCA | 0.35 Dom | 1.09(0.9-1.33)  | 3.71E-01 | 8.84E-01 |
| rs10155475 | 4 SNCA | 0.33 Dom | 0.92(0.76-1.11) | 3.77E-01 | 8.88E-01 |
| rs7356228  | 4 SNCA | 0.33 Dom | 0.92(0.76-1.11) | 3.77E-01 | 8.88E-01 |
| rs3822095  | 4 SNCA | 0.33 Dom | 0.92(0.76-1.11) | 3.77E-01 | 8.88E-01 |
| rs17016193 | 4 SNCA | 0.35 Rec | 1.14(0.85-1.52) | 3.80E-01 | 8.91E-01 |
| rs3775444  | 4 SNCA | 0.35 Rec | 1.14(0.85-1.52) | 3.80E-01 | 8.91E-01 |
| rs6532190  | 4 SNCA | 0.35 Rec | 1.14(0.85-1.52) | 3.80E-01 | 8.91E-01 |
| rs894278   | 4 SNCA | 0.35 Rec | 1.14(0.85-1.52) | 3.80E-01 | 8.91E-01 |
| rs10516847 | 4 SNCA | 0.35 Rec | 1.14(0.85-1.52) | 3.80E-01 | 8.91E-01 |
| rs3775442  | 4 SNCA | 0.35 Rec | 1.14(0.85-1.52) | 3.80E-01 | 8.91E-01 |
| rs6848726  | 4 SNCA | 0.33 Add | 0.92(0.8-1.06)  | 2.64E-01 | 9.05E-01 |
| rs2119787  | 4 SNCA | 0.33 Add | 0.92(0.8-1.06)  | 2.64E-01 | 9.05E-01 |
| rs3796664  | 4 SNCA | 0.33 Add | 0.92(0.8-1.06)  | 2.64E-01 | 9.05E-01 |
| rs3775438  | 4 SNCA | 0.35 Rec | 1.15(0.86-1.53) | 3.42E-01 | 9.05E-01 |

|            |        |          |                 |          |          |
|------------|--------|----------|-----------------|----------|----------|
| rs3898322  | 4 SNCA | 0.35 Rec | 1.15(0.86-1.53) | 3.42E-01 | 9.05E-01 |
| rs3822091  | 4 SNCA | 0.35 Rec | 1.15(0.86-1.53) | 3.42E-01 | 9.05E-01 |
| rs3729594  | 4 SNCA | 0.35 Rec | 1.15(0.86-1.53) | 3.42E-01 | 9.05E-01 |
| rs3822088  | 4 SNCA | 0.35 Rec | 1.15(0.86-1.53) | 3.42E-01 | 9.05E-01 |
| rs961386   | 4 SNCA | 0.35 Dom | 1.1(0.9-1.33)   | 3.48E-01 | 9.06E-01 |
| rs3910104  | 4 SNCA | 0.32 Rec | 0.86(0.62-1.18) | 3.52E-01 | 9.07E-01 |
| rs974711   | 4 SNCA | 0.32 Rec | 1.12(0.83-1.52) | 4.50E-01 | 9.18E-01 |
| rs2619372  | 4 SNCA | 0.32 Rec | 1.12(0.83-1.52) | 4.50E-01 | 9.18E-01 |
| rs2737020  | 4 SNCA | 0.32 Rec | 1.12(0.83-1.52) | 4.50E-01 | 9.18E-01 |
| rs1442143  | 4 SNCA | 0.32 Rec | 1.11(0.83-1.5)  | 4.80E-01 | 9.32E-01 |
| rs1837890  | 4 SNCA | 0.32 Rec | 1.11(0.83-1.5)  | 4.80E-01 | 9.32E-01 |
| rs1812923  | 4 SNCA | 0.33 Rec | 1.1(0.81-1.48)  | 5.49E-01 | 9.56E-01 |
| rs3796551  | 4 TDO2 | 0.08 Add | 1.24(0.97-1.58) | 8.71E-02 | 6.89E-01 |
| rs17379906 | 4 TDO2 | 0.10 Rec | 0.35(0.11-1.1)  | 7.17E-02 | 6.93E-01 |
| rs17033763 | 4 TDO2 | 0.10 Rec | 0.35(0.11-1.1)  | 7.17E-02 | 6.93E-01 |
| rs13125676 | 4 TDO2 | 0.08 Add | 1.21(0.95-1.55) | 1.23E-01 | 7.72E-01 |
| rs3755907  | 4 TDO2 | 0.08 Add | 1.21(0.95-1.55) | 1.28E-01 | 7.87E-01 |
| rs10857287 | 4 TDO2 | 0.08 Add | 1.21(0.95-1.54) | 1.31E-01 | 7.92E-01 |
| rs6817205  | 4 TDO2 | 0.04 Add | 1.27(0.91-1.77) | 1.56E-01 | 8.37E-01 |
| rs13434811 | 4 TDO2 | 0.04 Add | 1.27(0.9-1.77)  | 1.68E-01 | 8.54E-01 |
| rs10020753 | 4 TDO2 | 0.04 Add | 1.27(0.9-1.77)  | 1.68E-01 | 8.54E-01 |
| rs13152449 | 4 TDO2 | 0.04 Add | 1.25(0.9-1.75)  | 1.83E-01 | 8.80E-01 |
| rs3775085  | 4 TDO2 | 0.08 Dom | 1.18(0.91-1.53) | 2.17E-01 | 8.85E-01 |
| rs16998970 | 4 TDO2 | 0.06 Add | 1.01(0.76-1.36) | 9.21E-01 | 9.64E-01 |
| rs3755910  | 4 TDO2 | 0.04 Dom | 1.19(0.85-1.66) | 3.10E-01 | 9.66E-01 |
| rs2271538  | 4 TDO2 | 0.04 Dom | 1.18(0.84-1.64) | 3.40E-01 | 9.72E-01 |
| rs12502494 | 4 TDO2 | 0.10 Add | 1.12(0.89-1.41) | 3.16E-01 | 9.74E-01 |
| rs10517626 | 4 TDO2 | 0.10 Add | 1.12(0.89-1.41) | 3.16E-01 | 9.74E-01 |
| rs2878125  | 4 TDO2 | 0.10 Rec | 1.51(0.5-4.54)  | 4.68E-01 | 9.93E-01 |
| rs9044     | 4 TDO2 | 0.23 Dom | 1.01(0.83-1.22) | 9.46E-01 | 9.97E-01 |
| rs6856558  | 4 TDO2 | 0.18 Dom | 0.96(0.78-1.17) | 6.80E-01 | 9.99E-01 |
| rs6856354  | 4 TDO2 | 0.29 Dom | 1.08(0.89-1.31) | 4.31E-01 | 9.99E-01 |
| rs11723579 | 4 TDO2 | 0.25 Dom | 0.99(0.82-1.2)  | 9.27E-01 | 1.00E+00 |
| rs2292537  | 4 TDO2 | 0.03 Add | 0.91(0.61-1.36) | 6.48E-01 | 1.00E+00 |

|            |        |          |                 |          |          |
|------------|--------|----------|-----------------|----------|----------|
| rs2292536  | 4 TDO2 | 0.21 Add | 0.95(0.81-1.13) | 5.73E-01 | 1.00E+00 |
| rs1543108  | 4 TDO2 | 0.05 Add | 0.97(0.71-1.33) | 8.63E-01 | 1.00E+00 |
| rs2271537  | 4 TDO2 | 0.26 Dom | 0.96(0.79-1.16) | 6.77E-01 | 1.00E+00 |
| rs17033799 | 4 TDO2 | 0.01 Add | 1.06(0.55-2.05) | 8.65E-01 | 1.00E+00 |
| rs13128945 | 4 TDO2 | 0.02 Add | 1.04(0.68-1.61) | 8.42E-01 | 1.00E+00 |
| rs10840489 | 11 TH  | 0.11 Add | 1.23(0.99-1.53) | 5.59E-02 | 7.03E-01 |
| rs4320932  | 11 TH  | 0.44 Add | 1.01(0.88-1.15) | 9.28E-01 | 9.28E-01 |
| rs6356     | 11 TH  | 0.18 Dom | 1.17(0.96-1.43) | 1.25E-01 | 9.41E-01 |
| rs11043016 | 11 TH  | 0.09 Add | 0.97(0.76-1.23) | 8.11E-01 | 9.82E-01 |
| rs10840491 | 11 TH  | 0.11 Add | 1.15(0.94-1.41) | 1.82E-01 | 9.85E-01 |
| rs10840490 | 11 TH  | 0.12 Add | 1.13(0.92-1.38) | 2.41E-01 | 9.92E-01 |
| rs1004446  | 11 TH  | 0.29 Dom | 0.89(0.73-1.07) | 2.21E-01 | 9.94E-01 |
| rs11043001 | 11 TH  | 0.13 Rec | 1.31(0.67-2.54) | 4.26E-01 | 9.95E-01 |
| rs7396243  | 11 TH  | 0.22 Dom | 1.12(0.92-1.36) | 2.68E-01 | 9.95E-01 |
| rs4930046  | 11 TH  | 0.18 Dom | 1.12(0.92-1.37) | 2.65E-01 | 9.95E-01 |
| rs4929966  | 11 TH  | 0.03 Dom | 1.04(0.72-1.52) | 8.24E-01 | 9.96E-01 |
| rs7482891  | 11 TH  | 0.08 Add | 0.91(0.71-1.16) | 4.48E-01 | 9.97E-01 |
| rs11042982 | 11 TH  | 0.12 Add | 1.12(0.91-1.37) | 2.94E-01 | 9.98E-01 |
| rs3842748  | 11 TH  | 0.03 Dom | 0.96(0.65-1.41) | 8.39E-01 | 9.99E-01 |
| rs11564710 | 11 TH  | 0.20 Add | 1.05(0.88-1.24) | 5.92E-01 | 9.99E-01 |
| rs10770140 | 11 TH  | 0.08 Dom | 0.96(0.73-1.26) | 7.90E-01 | 9.99E-01 |
| rs11043007 | 11 TH  | 0.21 Dom | 1.1(0.91-1.34)  | 3.29E-01 | 9.99E-01 |
| rs7119275  | 11 TH  | 0.07 Add | 0.93(0.7-1.23)  | 6.07E-01 | 9.99E-01 |
| rs11564703 | 11 TH  | 0.21 Dom | 1.1(0.9-1.34)   | 3.45E-01 | 9.99E-01 |
| rs11042978 | 11 TH  | 0.19 Dom | 1.1(0.9-1.35)   | 3.40E-01 | 9.99E-01 |
| rs11564708 | 11 TH  | 0.04 Add | 1.1(0.77-1.58)  | 5.91E-01 | 9.99E-01 |
| rs11564705 | 11 TH  | 0.08 Add | 0.93(0.72-1.21) | 6.00E-01 | 9.99E-01 |
| rs7115640  | 11 TH  | 0.07 Add | 0.93(0.7-1.23)  | 6.03E-01 | 9.99E-01 |
| rs10840495 | 11 TH  | 0.07 Add | 0.93(0.7-1.23)  | 6.03E-01 | 9.99E-01 |
| rs10743149 | 11 TH  | 0.03 Dom | 0.91(0.62-1.34) | 6.33E-01 | 9.99E-01 |
| rs11564707 | 11 TH  | 0.08 Add | 0.94(0.73-1.21) | 6.17E-01 | 1.00E+00 |
| rs11043003 | 11 TH  | 0.08 Add | 0.94(0.73-1.21) | 6.17E-01 | 1.00E+00 |
| rs7129483  | 11 TH  | 0.08 Add | 0.94(0.73-1.21) | 6.17E-01 | 1.00E+00 |
| rs7924316  | 11 TH  | 0.40 Rec | 0.92(0.71-1.19) | 5.38E-01 | 1.00E+00 |

|            |       |          |                 |          |          |
|------------|-------|----------|-----------------|----------|----------|
| rs2070762  | 11 TH | 0.42 Dom | 0.97(0.79-1.19) | 7.67E-01 | 1.00E+00 |
| rs6578993  | 11 TH | 0.11 Add | 1.07(0.87-1.33) | 5.29E-01 | 1.00E+00 |
| rs10770141 | 11 TH | 0.06 Dom | 0.95(0.71-1.28) | 7.49E-01 | 1.00E+00 |

---

---

Web Table3: Association of SNPs in dopamine pathway with smoking initiation in different genders in WSPT

Web Table3A: Association of SNPs in dopamine pathway with smoking initiation in WSPT (Males)

| SNP        | Chr | Gene    | maf  | model | OR.CI           | p        | p.act2   |
|------------|-----|---------|------|-------|-----------------|----------|----------|
| rs17501915 | 18  | ADCYAP1 | 0.14 | Add   | 1.23(0.97-1.57) | 8.55E-02 | 9.29E-01 |
| rs17501755 | 18  | ADCYAP1 | 0.14 | Add   | 1.23(0.97-1.56) | 8.91E-02 | 9.36E-01 |
| rs11659736 | 18  | ADCYAP1 | 0.22 | Add   | 1.01(0.82-1.24) | 9.55E-01 | 9.55E-01 |
| rs10853372 | 18  | ADCYAP1 | 0.49 | Add   | 0.88(0.74-1.05) | 1.59E-01 | 9.83E-01 |
| rs940196   | 18  | ADCYAP1 | 0.03 | Add   | 0.75(0.46-1.24) | 2.66E-01 | 9.90E-01 |
| rs8192595  | 18  | ADCYAP1 | 0.07 | Add   | 0.82(0.59-1.14) | 2.42E-01 | 9.90E-01 |
| rs11663172 | 18  | ADCYAP1 | 0.37 | Dom   | 1.19(0.93-1.53) | 1.62E-01 | 9.93E-01 |
| rs11660066 | 18  | ADCYAP1 | 0.23 | Rec   | 0.68(0.39-1.18) | 1.71E-01 | 9.94E-01 |
| rs2846584  | 18  | ADCYAP1 | 0.33 | Rec   | 0.98(0.66-1.46) | 9.31E-01 | 9.95E-01 |
| rs11081461 | 18  | ADCYAP1 | 0.37 | Dom   | 1.19(0.92-1.52) | 1.80E-01 | 9.96E-01 |
| rs12373400 | 18  | ADCYAP1 | 0.37 | Dom   | 1.19(0.92-1.52) | 1.80E-01 | 9.96E-01 |
| rs16952813 | 18  | ADCYAP1 | 0.23 | Rec   | 0.7(0.4-1.23)   | 2.17E-01 | 9.97E-01 |
| rs17579719 | 18  | ADCYAP1 | 0.08 | Add   | 1.15(0.85-1.57) | 3.60E-01 | 9.97E-01 |
| rs4798767  | 18  | ADCYAP1 | 0.48 | Rec   | 0.83(0.62-1.11) | 2.13E-01 | 9.98E-01 |
| rs12968039 | 18  | ADCYAP1 | 0.21 | Rec   | 0.71(0.39-1.32) | 2.83E-01 | 9.99E-01 |
| rs11081411 | 18  | ADCYAP1 | 0.21 | Rec   | 0.71(0.39-1.32) | 2.83E-01 | 9.99E-01 |
| rs10775442 | 18  | ADCYAP1 | 0.21 | Rec   | 0.71(0.39-1.32) | 2.83E-01 | 9.99E-01 |
| rs4798684  | 18  | ADCYAP1 | 0.21 | Rec   | 0.71(0.39-1.32) | 2.83E-01 | 9.99E-01 |
| rs10853365 | 18  | ADCYAP1 | 0.22 | Rec   | 0.71(0.39-1.32) | 2.83E-01 | 9.99E-01 |
| rs7241142  | 18  | ADCYAP1 | 0.22 | Rec   | 0.71(0.39-1.32) | 2.83E-01 | 9.99E-01 |
| rs4797328  | 18  | ADCYAP1 | 0.22 | Rec   | 0.71(0.39-1.32) | 2.83E-01 | 9.99E-01 |
| rs1599789  | 18  | ADCYAP1 | 0.22 | Rec   | 0.71(0.39-1.32) | 2.83E-01 | 9.99E-01 |
| rs12961210 | 18  | ADCYAP1 | 0.21 | Dom   | 1.08(0.84-1.38) | 5.62E-01 | 1.00E+00 |
| rs4797325  | 18  | ADCYAP1 | 0.46 | Dom   | 1.05(0.8-1.37)  | 7.36E-01 | 1.00E+00 |
| rs7228988  | 18  | ADCYAP1 | 0.08 | Add   | 1.11(0.82-1.5)  | 4.97E-01 | 1.00E+00 |
| rs12967004 | 18  | ADCYAP1 | 0.21 | Rec   | 1.19(0.67-2.13) | 5.56E-01 | 1.00E+00 |
| rs11877293 | 18  | ADCYAP1 | 0.45 | Rec   | 1.02(0.76-1.37) | 8.95E-01 | 1.00E+00 |
| rs9635870  | 18  | ADCYAP1 | 0.45 | Rec   | 0.88(0.65-1.19) | 3.97E-01 | 1.00E+00 |
| rs11665625 | 18  | ADCYAP1 | 0.41 | Dom   | 1.07(0.83-1.37) | 6.24E-01 | 1.00E+00 |
| rs6506614  | 18  | ADCYAP1 | 0.33 | Rec   | 0.94(0.63-1.38) | 7.41E-01 | 1.00E+00 |



|            |               |          |                 |          |          |
|------------|---------------|----------|-----------------|----------|----------|
| rs8093310  | 18 ADCYAP1    | 0.33 Rec | 0.94(0.63-1.38) | 7.41E-01 | 1.00E+00 |
| rs11081414 | 18 ADCYAP1    | 0.33 Rec | 0.94(0.63-1.38) | 7.41E-01 | 1.00E+00 |
| rs11663168 | 18 ADCYAP1    | 0.03 Add | 0.93(0.57-1.5)  | 7.55E-01 | 1.00E+00 |
| rs11663363 | 18 ADCYAP1    | 0.03 Add | 0.97(0.59-1.58) | 8.92E-01 | 1.00E+00 |
| rs12608148 | 18 ADCYAP1    | 0.33 Rec | 0.94(0.64-1.39) | 7.54E-01 | 1.00E+00 |
| rs2846807  | 18 ADCYAP1    | 0.45 Rec | 0.9(0.66-1.21)  | 4.87E-01 | 1.00E+00 |
| rs9957039  | 18 ADCYAP1    | 0.41 Add | 1.05(0.88-1.25) | 5.70E-01 | 1.00E+00 |
| rs17500692 | 18 ADCYAP1    | 0.24 Rec | 0.89(0.53-1.48) | 6.49E-01 | 1.00E+00 |
| rs7242260  | 18 ADCYAP1    | 0.24 Rec | 0.89(0.53-1.48) | 6.49E-01 | 1.00E+00 |
| rs2846578  | 18 ADCYAP1    | 0.34 Rec | 0.95(0.65-1.39) | 8.11E-01 | 1.00E+00 |
| rs1916610  | 18 ADCYAP1    | 0.45 Rec | 1.03(0.76-1.38) | 8.68E-01 | 1.00E+00 |
| rs2040177  | 18 ADCYAP1    | 0.45 Rec | 1.03(0.76-1.38) | 8.68E-01 | 1.00E+00 |
| rs2846583  | 18 ADCYAP1    | 0.34 Dom | 0.98(0.77-1.25) | 8.57E-01 | 1.00E+00 |
| rs2846581  | 18 ADCYAP1    | 0.34 Dom | 0.98(0.77-1.25) | 8.57E-01 | 1.00E+00 |
| rs2471857  | 11 ANKK1_DRD2 | 0.45 Dom | 1.33(1.02-1.74) | 3.42E-02 | 7.43E-01 |
| rs2471854  | 11 ANKK1_DRD2 | 0.45 Dom | 1.33(1.02-1.74) | 3.55E-02 | 7.55E-01 |
| rs2283265  | 11 ANKK1_DRD2 | 0.44 Dom | 1.32(1.01-1.72) | 4.05E-02 | 7.94E-01 |
| rs1125394  | 11 ANKK1_DRD2 | 0.45 Dom | 1.32(1.01-1.72) | 4.21E-02 | 8.05E-01 |
| rs1076560  | 11 ANKK1_DRD2 | 0.45 Dom | 1.31(1.01-1.71) | 4.49E-02 | 8.25E-01 |
| rs4938015  | 11 ANKK1_DRD2 | 0.46 Dom | 1.31(1-1.72)    | 4.69E-02 | 8.34E-01 |
| rs17115439 | 11 ANKK1_DRD2 | 0.46 Dom | 1.31(1-1.72)    | 4.69E-02 | 8.35E-01 |
| rs4938013  | 11 ANKK1_DRD2 | 0.46 Dom | 1.31(1-1.72)    | 4.69E-02 | 8.35E-01 |
| rs1799978  | 11 ANKK1_DRD2 | 0.20 Add | 1.24(1-1.53)    | 5.12E-02 | 8.63E-01 |
| rs10891546 | 11 ANKK1_DRD2 | 0.46 Dom | 1.3(0.99-1.71)  | 5.59E-02 | 8.69E-01 |
| rs1079727  | 11 ANKK1_DRD2 | 0.45 Dom | 1.3(0.99-1.69)  | 5.63E-02 | 8.72E-01 |
| rs4936274  | 11 ANKK1_DRD2 | 0.11 Rec | 0.29(0.08-1.13) | 7.53E-02 | 8.75E-01 |
| rs11214613 | 11 ANKK1_DRD2 | 0.11 Rec | 0.29(0.08-1.13) | 7.53E-02 | 8.76E-01 |
| rs7123797  | 11 ANKK1_DRD2 | 0.46 Dom | 1.29(0.98-1.69) | 6.51E-02 | 8.94E-01 |
| rs7945132  | 11 ANKK1_DRD2 | 0.46 Dom | 1.29(0.98-1.69) | 6.51E-02 | 8.94E-01 |
| rs1079596  | 11 ANKK1_DRD2 | 0.45 Dom | 1.28(0.98-1.68) | 6.60E-02 | 8.97E-01 |
| rs2734836  | 11 ANKK1_DRD2 | 0.45 Dom | 1.28(0.98-1.67) | 6.64E-02 | 8.98E-01 |
| rs1079597  | 11 ANKK1_DRD2 | 0.45 Dom | 1.28(0.98-1.67) | 6.64E-02 | 8.99E-01 |
| rs2075654  | 11 ANKK1_DRD2 | 0.45 Dom | 1.28(0.98-1.67) | 6.64E-02 | 8.99E-01 |
| rs1800497  | 11 ANKK1_DRD2 | 0.42 Dom | 1.27(0.98-1.65) | 6.82E-02 | 9.03E-01 |

|            |               |          |                 |          |          |
|------------|---------------|----------|-----------------|----------|----------|
| rs4938012  | 11 ANKK1_DRD2 | 0.46 Dom | 1.28(0.98-1.67) | 7.23E-02 | 9.15E-01 |
| rs7118900  | 11 ANKK1_DRD2 | 0.42 Dom | 1.27(0.98-1.64) | 7.32E-02 | 9.17E-01 |
| rs11214601 | 11 ANKK1_DRD2 | 0.42 Dom | 1.26(0.98-1.63) | 7.71E-02 | 9.26E-01 |
| rs12574471 | 11 ANKK1_DRD2 | 0.10 Dom | 1.3(0.96-1.76)  | 8.73E-02 | 9.51E-01 |
| rs1079595  | 11 ANKK1_DRD2 | 0.42 Dom | 1.24(0.96-1.61) | 9.63E-02 | 9.55E-01 |
| rs1079594  | 11 ANKK1_DRD2 | 0.42 Dom | 1.24(0.96-1.61) | 9.63E-02 | 9.55E-01 |
| rs1124491  | 11 ANKK1_DRD2 | 0.42 Dom | 1.24(0.96-1.61) | 9.63E-02 | 9.55E-01 |
| rs7131440  | 11 ANKK1_DRD2 | 0.04 Add | 1.02(0.66-1.58) | 9.18E-01 | 9.61E-01 |
| rs4938017  | 11 ANKK1_DRD2 | 0.04 Add | 1.02(0.66-1.58) | 9.18E-01 | 9.61E-01 |
| rs1076562  | 11 ANKK1_DRD2 | 0.49 Add | 1.14(0.96-1.36) | 1.36E-01 | 9.62E-01 |
| rs2245805  | 11 ANKK1_DRD2 | 0.49 Add | 1.14(0.96-1.36) | 1.38E-01 | 9.64E-01 |
| rs2002453  | 11 ANKK1_DRD2 | 0.49 Add | 1.14(0.96-1.36) | 1.38E-01 | 9.64E-01 |
| rs4460839  | 11 ANKK1_DRD2 | 0.14 Rec | 0.51(0.22-1.18) | 1.14E-01 | 9.66E-01 |
| rs4936270  | 11 ANKK1_DRD2 | 0.14 Rec | 0.51(0.22-1.18) | 1.14E-01 | 9.66E-01 |
| rs4581480  | 11 ANKK1_DRD2 | 0.14 Rec | 0.51(0.22-1.18) | 1.14E-01 | 9.66E-01 |
| rs4245148  | 11 ANKK1_DRD2 | 0.14 Rec | 0.51(0.22-1.18) | 1.14E-01 | 9.66E-01 |
| rs4938014  | 11 ANKK1_DRD2 | 0.49 Add | 0.88(0.74-1.05) | 1.48E-01 | 9.69E-01 |
| rs2005313  | 11 ANKK1_DRD2 | 0.49 Add | 1.14(0.96-1.35) | 1.48E-01 | 9.70E-01 |
| rs877137   | 11 ANKK1_DRD2 | 0.04 Add | 1.3(0.86-1.98)  | 2.18E-01 | 9.72E-01 |
| rs12800853 | 11 ANKK1_DRD2 | 0.04 Dom | 1.05(0.68-1.62) | 8.38E-01 | 9.76E-01 |
| rs4436578  | 11 ANKK1_DRD2 | 0.43 Add | 0.87(0.73-1.04) | 1.25E-01 | 9.81E-01 |
| rs11214605 | 11 ANKK1_DRD2 | 0.04 Dom | 1.02(0.65-1.58) | 9.39E-01 | 9.83E-01 |
| rs4630328  | 11 ANKK1_DRD2 | 0.02 Add | 1.15(0.66-2.02) | 6.27E-01 | 9.85E-01 |
| rs10891545 | 11 ANKK1_DRD2 | 0.49 Add | 0.89(0.75-1.05) | 1.77E-01 | 9.85E-01 |
| rs4938016  | 11 ANKK1_DRD2 | 0.47 Add | 1.14(0.96-1.35) | 1.34E-01 | 9.85E-01 |
| rs4648319  | 11 ANKK1_DRD2 | 0.41 Dom | 1.22(0.94-1.57) | 1.35E-01 | 9.86E-01 |
| rs2075652  | 11 ANKK1_DRD2 | 0.42 Add | 0.87(0.73-1.04) | 1.36E-01 | 9.87E-01 |
| rs17529477 | 11 ANKK1_DRD2 | 0.02 Add | 0.96(0.54-1.7)  | 8.79E-01 | 9.87E-01 |
| rs7103679  | 11 ANKK1_DRD2 | 0.40 Dom | 1.21(0.94-1.56) | 1.46E-01 | 9.90E-01 |
| rs877138   | 11 ANKK1_DRD2 | 0.47 Dom | 1.22(0.93-1.6)  | 1.46E-01 | 9.90E-01 |
| rs11214598 | 11 ANKK1_DRD2 | 0.47 Add | 1.14(0.96-1.35) | 1.46E-01 | 9.90E-01 |
| rs12360992 | 11 ANKK1_DRD2 | 0.05 Dom | 1.25(0.84-1.86) | 2.80E-01 | 9.92E-01 |
| rs11214596 | 11 ANKK1_DRD2 | 0.05 Dom | 1.25(0.84-1.86) | 2.80E-01 | 9.92E-01 |
| rs11214611 | 11 ANKK1_DRD2 | 0.40 Dom | 0.84(0.65-1.08) | 1.64E-01 | 9.92E-01 |

|            |               |          |                 |          |          |
|------------|---------------|----------|-----------------|----------|----------|
| rs4590907  | 11 ANKK1_DRD2 | 0.50 Add | 0.89(0.75-1.05) | 1.67E-01 | 9.92E-01 |
| rs17115583 | 11 ANKK1_DRD2 | 0.42 Add | 0.88(0.74-1.05) | 1.55E-01 | 9.92E-01 |
| rs3897584  | 11 ANKK1_DRD2 | 0.47 Dom | 1.21(0.92-1.58) | 1.67E-01 | 9.92E-01 |
| rs10891544 | 11 ANKK1_DRD2 | 0.04 Add | 1.25(0.81-1.91) | 3.12E-01 | 9.93E-01 |
| rs12224538 | 11 ANKK1_DRD2 | 0.49 Add | 0.88(0.74-1.05) | 1.60E-01 | 9.93E-01 |
| rs7131056  | 11 ANKK1_DRD2 | 0.42 Dom | 0.97(0.75-1.25) | 8.16E-01 | 9.94E-01 |
| rs4648318  | 11 ANKK1_DRD2 | 0.46 Dom | 1.13(0.86-1.47) | 3.89E-01 | 9.94E-01 |
| rs4245147  | 11 ANKK1_DRD2 | 0.17 Rec | 0.58(0.27-1.26) | 1.71E-01 | 9.94E-01 |
| rs4936271  | 11 ANKK1_DRD2 | 0.17 Rec | 0.58(0.27-1.26) | 1.71E-01 | 9.94E-01 |
| rs4274224  | 11 ANKK1_DRD2 | 0.17 Rec | 0.58(0.27-1.26) | 1.71E-01 | 9.94E-01 |
| rs6279     | 11 ANKK1_DRD2 | 0.47 Add | 1.13(0.95-1.34) | 1.77E-01 | 9.94E-01 |
| rs4245146  | 11 ANKK1_DRD2 | 0.17 Rec | 0.58(0.27-1.26) | 1.71E-01 | 9.94E-01 |
| rs1003641  | 11 ANKK1_DRD2 | 0.47 Add | 1.12(0.95-1.34) | 1.79E-01 | 9.95E-01 |
| rs2242592  | 11 ANKK1_DRD2 | 0.47 Add | 1.12(0.95-1.34) | 1.79E-01 | 9.95E-01 |
| rs2587550  | 11 ANKK1_DRD2 | 0.47 Add | 1.12(0.95-1.34) | 1.79E-01 | 9.95E-01 |
| rs11214602 | 11 ANKK1_DRD2 | 0.47 Add | 1.12(0.95-1.34) | 1.79E-01 | 9.95E-01 |
| rs754672   | 11 ANKK1_DRD2 | 0.05 Dom | 1.23(0.81-1.86) | 3.24E-01 | 9.95E-01 |
| rs2859545  | 11 ANKK1_DRD2 | 0.47 Add | 1.12(0.94-1.33) | 1.94E-01 | 9.95E-01 |
| rs1107162  | 11 ANKK1_DRD2 | 0.05 Dom | 1.22(0.8-1.84)  | 3.54E-01 | 9.95E-01 |
| rs4938011  | 11 ANKK1_DRD2 | 0.50 Add | 0.91(0.76-1.08) | 2.72E-01 | 9.95E-01 |
| rs6275     | 11 ANKK1_DRD2 | 0.47 Add | 1.12(0.94-1.33) | 1.96E-01 | 9.95E-01 |
| rs2734837  | 11 ANKK1_DRD2 | 0.05 Dom | 1.22(0.81-1.83) | 3.34E-01 | 9.95E-01 |
| rs2734838  | 11 ANKK1_DRD2 | 0.05 Dom | 1.22(0.81-1.83) | 3.34E-01 | 9.95E-01 |
| rs2734839  | 11 ANKK1_DRD2 | 0.05 Dom | 1.22(0.81-1.83) | 3.34E-01 | 9.95E-01 |
| rs4938010  | 11 ANKK1_DRD2 | 0.50 Add | 0.91(0.76-1.08) | 2.65E-01 | 9.95E-01 |
| rs4587762  | 11 ANKK1_DRD2 | 0.04 Dom | 1.21(0.8-1.84)  | 3.62E-01 | 9.95E-01 |
| rs2734841  | 11 ANKK1_DRD2 | 0.47 Add | 1.12(0.94-1.33) | 2.05E-01 | 9.96E-01 |
| rs2734842  | 11 ANKK1_DRD2 | 0.47 Add | 1.12(0.94-1.33) | 2.05E-01 | 9.96E-01 |
| rs6276     | 11 ANKK1_DRD2 | 0.47 Add | 1.12(0.94-1.33) | 2.05E-01 | 9.96E-01 |
| rs2734849  | 11 ANKK1_DRD2 | 0.05 Dom | 1.23(0.82-1.84) | 3.12E-01 | 9.96E-01 |
| rs10891541 | 11 ANKK1_DRD2 | 0.49 Dom | 0.87(0.66-1.15) | 3.38E-01 | 9.96E-01 |
| rs7125415  | 11 ANKK1_DRD2 | 0.40 Dom | 0.89(0.69-1.14) | 3.49E-01 | 9.96E-01 |
| rs4601821  | 11 ANKK1_DRD2 | 0.47 Dom | 1.19(0.91-1.56) | 2.09E-01 | 9.96E-01 |
| rs4620755  | 11 ANKK1_DRD2 | 0.41 Rec | 0.81(0.58-1.13) | 2.11E-01 | 9.96E-01 |

|            |               |          |                 |          |          |
|------------|---------------|----------|-----------------|----------|----------|
| rs4586205  | 11 ANKK1_DRD2 | 0.45 Dom | 1.18(0.9-1.53)  | 2.27E-01 | 9.96E-01 |
| rs6277     | 11 ANKK1_DRD2 | 0.05 Dom | 1.2(0.8-1.82)   | 3.76E-01 | 9.96E-01 |
| rs1124493  | 11 ANKK1_DRD2 | 0.47 Add | 1.11(0.94-1.32) | 2.26E-01 | 9.97E-01 |
| rs11214607 | 11 ANKK1_DRD2 | 0.42 Dom | 1.17(0.91-1.52) | 2.24E-01 | 9.97E-01 |
| rs2734833  | 11 ANKK1_DRD2 | 0.05 Dom | 1.16(0.78-1.71) | 4.72E-01 | 9.97E-01 |
| rs17601612 | 11 ANKK1_DRD2 | 0.02 Add | 1.19(0.68-2.1)  | 5.43E-01 | 9.97E-01 |
| rs11601054 | 11 ANKK1_DRD2 | 0.01 Add | 0.9(0.44-1.84)  | 7.79E-01 | 9.97E-01 |
| rs12422191 | 11 ANKK1_DRD2 | 0.03 Add | 0.84(0.5-1.4)   | 4.99E-01 | 9.97E-01 |
| rs6589377  | 11 ANKK1_DRD2 | 0.02 Add | 1.25(0.72-2.17) | 4.22E-01 | 9.98E-01 |
| rs11604671 | 11 ANKK1_DRD2 | 0.05 Dom | 1.18(0.79-1.77) | 4.25E-01 | 9.98E-01 |
| rs1116313  | 11 ANKK1_DRD2 | 0.05 Dom | 1.17(0.78-1.76) | 4.51E-01 | 9.98E-01 |
| rs1076563  | 11 ANKK1_DRD2 | 0.05 Dom | 1.17(0.78-1.76) | 4.51E-01 | 9.98E-01 |
| rs12364051 | 11 ANKK1_DRD2 | 0.04 Dom | 1.15(0.75-1.77) | 5.10E-01 | 9.98E-01 |
| rs11214589 | 11 ANKK1_DRD2 | 0.05 Dom | 1.16(0.77-1.76) | 4.75E-01 | 9.98E-01 |
| rs2734848  | 11 ANKK1_DRD2 | 0.04 Add | 0.89(0.57-1.37) | 5.86E-01 | 9.98E-01 |
| rs2234689  | 11 ANKK1_DRD2 | 0.04 Add | 0.89(0.57-1.37) | 5.86E-01 | 9.98E-01 |
| rs7122454  | 11 ANKK1_DRD2 | 0.40 Dom | 0.87(0.68-1.12) | 2.70E-01 | 9.98E-01 |
| rs10891549 | 11 ANKK1_DRD2 | 0.05 Dom | 1.16(0.77-1.74) | 4.89E-01 | 9.98E-01 |
| rs2440390  | 11 ANKK1_DRD2 | 0.04 Add | 0.83(0.54-1.28) | 3.96E-01 | 9.98E-01 |
| rs1554929  | 11 ANKK1_DRD2 | 0.05 Dom | 1.18(0.78-1.77) | 4.38E-01 | 9.98E-01 |
| rs10891551 | 11 ANKK1_DRD2 | 0.39 Dom | 0.87(0.68-1.12) | 2.76E-01 | 9.98E-01 |
| rs4648317  | 11 ANKK1_DRD2 | 0.39 Dom | 0.87(0.68-1.12) | 2.76E-01 | 9.98E-01 |
| rs2587548  | 11 ANKK1_DRD2 | 0.05 Dom | 1.19(0.79-1.8)  | 4.09E-01 | 9.98E-01 |
| rs4938019  | 11 ANKK1_DRD2 | 0.38 Add | 0.92(0.77-1.1)  | 3.55E-01 | 9.98E-01 |
| rs4350392  | 11 ANKK1_DRD2 | 0.38 Add | 0.92(0.77-1.1)  | 3.55E-01 | 9.98E-01 |
| rs7107223  | 11 ANKK1_DRD2 | 0.05 Dom | 1.19(0.78-1.8)  | 4.23E-01 | 9.98E-01 |
| rs1124492  | 11 ANKK1_DRD2 | 0.49 Add | 0.92(0.77-1.09) | 3.42E-01 | 9.98E-01 |
| rs7122246  | 11 ANKK1_DRD2 | 0.05 Dom | 1.18(0.78-1.79) | 4.27E-01 | 9.98E-01 |
| rs2471851  | 11 ANKK1_DRD2 | 0.40 Dom | 1.16(0.9-1.49)  | 2.62E-01 | 9.99E-01 |
| rs7350522  | 11 ANKK1_DRD2 | 0.40 Dom | 1.16(0.9-1.49)  | 2.62E-01 | 9.99E-01 |
| rs10891552 | 11 ANKK1_DRD2 | 0.38 Rec | 0.92(0.65-1.29) | 6.23E-01 | 9.99E-01 |
| rs7124442  | 11 BDNF       | 0.08 Add | 1.31(0.96-1.79) | 8.94E-02 | 7.02E-01 |
| rs1013402  | 11 BDNF       | 0.05 Dom | 1.42(0.96-2.11) | 8.07E-02 | 7.17E-01 |
| rs10767658 | 11 BDNF       | 0.05 Dom | 1.43(0.96-2.12) | 8.04E-02 | 7.18E-01 |

|            |         |          |                 |          |          |
|------------|---------|----------|-----------------|----------|----------|
| rs925946   | 11 BDNF | 0.05 Dom | 1.43(0.96-2.12) | 8.04E-02 | 7.19E-01 |
| rs11030108 | 11 BDNF | 0.05 Dom | 1.4(0.94-2.08)  | 9.82E-02 | 7.81E-01 |
| rs1401635  | 11 BDNF | 0.05 Dom | 1.4(0.94-2.08)  | 9.82E-02 | 7.82E-01 |
| rs11030119 | 11 BDNF | 0.05 Dom | 1.39(0.94-2.06) | 1.01E-01 | 7.89E-01 |
| rs962369   | 11 BDNF | 0.05 Dom | 1.39(0.94-2.06) | 1.01E-01 | 7.90E-01 |
| rs7927728  | 11 BDNF | 0.04 Add | 1.35(0.91-2.01) | 1.41E-01 | 8.41E-01 |
| rs11030123 | 11 BDNF | 0.04 Dom | 1.4(0.91-2.16)  | 1.26E-01 | 8.41E-01 |
| rs908867   | 11 BDNF | 0.04 Dom | 1.4(0.91-2.16)  | 1.26E-01 | 8.42E-01 |
| rs7127507  | 11 BDNF | 0.08 Dom | 1.26(0.9-1.76)  | 1.83E-01 | 8.98E-01 |
| rs11030121 | 11 BDNF | 0.08 Add | 1.23(0.9-1.68)  | 1.86E-01 | 9.33E-01 |
| rs10835210 | 11 BDNF | 0.27 Dom | 1.01(0.79-1.28) | 9.59E-01 | 9.59E-01 |
| rs11030107 | 11 BDNF | 0.05 Add | 0.81(0.53-1.23) | 3.19E-01 | 9.74E-01 |
| rs2049048  | 11 BDNF | 0.06 Dom | 0.8(0.54-1.19)  | 2.75E-01 | 9.76E-01 |
| rs2203877  | 11 BDNF | 0.28 Rec | 0.94(0.59-1.48) | 7.82E-01 | 9.98E-01 |
| rs1519479  | 11 BDNF | 0.28 Rec | 0.94(0.59-1.48) | 7.82E-01 | 9.98E-01 |
| rs988748   | 11 BDNF | 0.47 Rec | 0.98(0.74-1.31) | 9.17E-01 | 9.99E-01 |
| rs7931247  | 11 BDNF | 0.47 Rec | 0.87(0.65-1.17) | 3.52E-01 | 1.00E+00 |
| rs16917271 | 11 BDNF | 0.18 Add | 0.93(0.74-1.16) | 4.97E-01 | 1.00E+00 |
| rs16917234 | 11 BDNF | 0.17 Rec | 0.83(0.4-1.7)   | 6.02E-01 | 1.00E+00 |
| rs12291063 | 11 BDNF | 0.17 Rec | 0.83(0.4-1.7)   | 6.02E-01 | 1.00E+00 |
| rs12291186 | 11 BDNF | 0.17 Rec | 0.83(0.4-1.7)   | 6.02E-01 | 1.00E+00 |
| rs7940188  | 11 BDNF | 0.17 Rec | 0.83(0.4-1.7)   | 6.02E-01 | 1.00E+00 |
| rs12273539 | 11 BDNF | 0.17 Rec | 0.83(0.4-1.7)   | 6.02E-01 | 1.00E+00 |
| rs10767664 | 11 BDNF | 0.47 Rec | 0.97(0.73-1.3)  | 8.59E-01 | 1.00E+00 |
| rs4923468  | 11 BDNF | 0.03 Add | 1.03(0.6-1.78)  | 9.12E-01 | 1.00E+00 |
| rs925947   | 11 BDNF | 0.47 Add | 0.97(0.82-1.14) | 6.79E-01 | 1.00E+00 |
| rs1519480  | 11 BDNF | 0.25 Rec | 1.1(0.68-1.79)  | 6.97E-01 | 1.00E+00 |
| rs2030323  | 11 BDNF | 0.47 Rec | 0.98(0.74-1.3)  | 8.86E-01 | 1.00E+00 |
| rs7102921  | 11 BDNF | 0.17 Dom | 0.95(0.73-1.23) | 6.87E-01 | 1.00E+00 |
| rs11030098 | 11 BDNF | 0.17 Dom | 0.95(0.73-1.23) | 6.87E-01 | 1.00E+00 |
| rs6265     | 11 BDNF | 0.48 Dom | 0.97(0.74-1.27) | 8.38E-01 | 1.00E+00 |
| rs16917237 | 11 BDNF | 0.48 Dom | 0.97(0.74-1.27) | 8.24E-01 | 1.00E+00 |
| rs7103411  | 11 BDNF | 0.48 Dom | 0.97(0.74-1.27) | 8.24E-01 | 1.00E+00 |
| rs6484320  | 11 BDNF | 0.48 Dom | 0.97(0.74-1.27) | 8.24E-01 | 1.00E+00 |

|            |          |          |                 |          |          |
|------------|----------|----------|-----------------|----------|----------|
| rs11030101 | 11 BDNF  | 0.27 Rec | 0.97(0.61-1.56) | 9.10E-01 | 1.00E+00 |
| rs2049046  | 11 BDNF  | 0.45 Add | 0.96(0.81-1.14) | 6.67E-01 | 1.00E+00 |
| rs11030104 | 11 BDNF  | 0.48 Dom | 0.96(0.74-1.26) | 7.92E-01 | 1.00E+00 |
| rs7934165  | 11 BDNF  | 0.45 Dom | 0.96(0.74-1.25) | 7.72E-01 | 1.00E+00 |
| rs10767665 | 11 BDNF  | 0.45 Dom | 0.96(0.74-1.25) | 7.72E-01 | 1.00E+00 |
| rs2030324  | 11 BDNF  | 0.45 Dom | 0.96(0.74-1.25) | 7.72E-01 | 1.00E+00 |
| rs12419948 | 11 BDNF  | 0.47 Rec | 0.96(0.72-1.28) | 7.70E-01 | 1.00E+00 |
| rs1491850  | 11 BDNF  | 0.45 Rec | 0.92(0.68-1.24) | 5.67E-01 | 1.00E+00 |
| rs10501087 | 11 BDNF  | 0.47 Rec | 0.96(0.72-1.28) | 8.02E-01 | 1.00E+00 |
| rs7103873  | 11 BDNF  | 0.45 Dom | 0.97(0.74-1.25) | 7.90E-01 | 1.00E+00 |
| rs12433818 | 14 CALM1 | 0.46 Dom | 0.72(0.55-0.94) | 1.42E-02 | 3.19E-01 |
| rs12895068 | 14 CALM1 | 0.46 Dom | 0.72(0.55-0.94) | 1.42E-02 | 3.19E-01 |
| rs4904690  | 14 CALM1 | 0.37 Add | 0.85(0.71-1.02) | 8.42E-02 | 8.49E-01 |
| rs10129175 | 14 CALM1 | 0.37 Dom | 0.82(0.64-1.05) | 1.09E-01 | 8.96E-01 |
| rs876259   | 14 CALM1 | 0.37 Dom | 0.82(0.64-1.05) | 1.21E-01 | 9.31E-01 |
| rs2300502  | 14 CALM1 | 0.21 Dom | 0.96(0.75-1.24) | 7.66E-01 | 9.46E-01 |
| rs2300497  | 14 CALM1 | 0.21 Dom | 0.96(0.75-1.24) | 7.66E-01 | 9.46E-01 |
| rs6575131  | 14 CALM1 | 0.21 Dom | 0.96(0.75-1.24) | 7.66E-01 | 9.46E-01 |
| rs6575134  | 14 CALM1 | 0.09 Dom | 1.02(0.74-1.4)  | 9.02E-01 | 9.90E-01 |
| rs3814843  | 14 CALM1 | 0.09 Add | 1.03(0.77-1.38) | 8.26E-01 | 9.96E-01 |
| rs11629265 | 14 CALM1 | 0.17 Rec | 1.58(0.74-3.38) | 2.42E-01 | 9.96E-01 |
| rs2110114  | 14 CALM1 | 0.21 Rec | 0.93(0.49-1.78) | 8.34E-01 | 9.97E-01 |
| rs2110113  | 14 CALM1 | 0.21 Rec | 0.93(0.49-1.78) | 8.34E-01 | 9.97E-01 |
| rs3213718  | 14 CALM1 | 0.18 Add | 0.96(0.77-1.2)  | 7.03E-01 | 9.97E-01 |
| rs8006462  | 14 CALM1 | 0.16 Rec | 0.85(0.41-1.74) | 6.53E-01 | 9.98E-01 |
| rs2268433  | 14 CALM1 | 0.23 Rec | 0.87(0.49-1.55) | 6.31E-01 | 9.98E-01 |
| rs5871     | 14 CALM1 | 0.38 Rec | 0.9(0.63-1.27)  | 5.41E-01 | 9.98E-01 |
| rs3179089  | 14 CALM1 | 0.16 Rec | 1.39(0.67-2.89) | 3.80E-01 | 9.99E-01 |
| rs2300496  | 14 CALM1 | 0.16 Rec | 1.39(0.67-2.89) | 3.80E-01 | 9.99E-01 |
| rs2300500  | 14 CALM1 | 0.16 Rec | 1.39(0.67-2.89) | 3.80E-01 | 9.99E-01 |
| rs3814847  | 14 CALM1 | 0.22 Dom | 0.94(0.73-1.2)  | 6.17E-01 | 9.99E-01 |
| rs12885713 | 14 CALM1 | 0.16 Rec | 1.47(0.71-3.04) | 2.95E-01 | 9.99E-01 |
| rs2896135  | 14 CALM1 | 0.22 Dom | 0.88(0.69-1.13) | 3.13E-01 | 9.99E-01 |
| rs759062   | 14 CALM1 | 0.16 Dom | 0.89(0.68-1.16) | 3.80E-01 | 9.99E-01 |

|            |          |          |                 |          |          |
|------------|----------|----------|-----------------|----------|----------|
| rs7147045  | 14 CALM1 | 0.02 Add | 0.82(0.43-1.57) | 5.49E-01 | 1.00E+00 |
| rs12891145 | 14 CALM1 | 0.21 Dom | 0.89(0.69-1.14) | 3.39E-01 | 1.00E+00 |
| rs3793336  | 7 CDK5   | 0.06 Add | 1.4(0.97-2.03)  | 7.57E-02 | 5.57E-01 |
| rs2303936  | 7 CDK5   | 0.02 Add | 0.86(0.42-1.75) | 6.75E-01 | 7.20E-01 |
| rs2303937  | 7 CDK5   | 0.41 Add | 0.88(0.74-1.05) | 1.50E-01 | 8.76E-01 |
| rs2303928  | 7 CDK5   | 0.31 Dom | 0.82(0.64-1.04) | 1.08E-01 | 8.82E-01 |
| rs2303933  | 7 CDK5   | 0.26 Add | 1.17(0.96-1.42) | 1.15E-01 | 8.88E-01 |
| rs2288645  | 7 CDK5   | 0.22 Rec | 1.63(0.88-3.03) | 1.24E-01 | 8.89E-01 |
| rs2303934  | 7 CDK5   | 0.11 Rec | 0.79(0.26-2.38) | 6.74E-01 | 8.91E-01 |
| rs2069456  | 7 CDK5   | 0.33 Rec | 1.3(0.88-1.91)  | 1.88E-01 | 9.26E-01 |
| rs11765015 | 7 CDK5   | 0.37 Rec | 0.8(0.56-1.14)  | 2.24E-01 | 9.41E-01 |
| rs1549759  | 7 CDK5   | 0.05 Add | 1.21(0.81-1.82) | 3.44E-01 | 9.50E-01 |
| rs891507   | 7 CDK5   | 0.05 Add | 1.21(0.81-1.82) | 3.44E-01 | 9.50E-01 |
| rs1549760  | 7 CDK5   | 0.28 Rec | 0.91(0.58-1.41) | 6.64E-01 | 9.61E-01 |
| rs2069459  | 7 CDK5   | 0.37 Rec | 1.19(0.83-1.71) | 3.49E-01 | 9.68E-01 |
| rs2069443  | 7 CDK5   | 0.29 Dom | 0.93(0.73-1.18) | 5.52E-01 | 9.82E-01 |
| rs2303929  | 7 CDK5   | 0.29 Dom | 0.93(0.73-1.19) | 5.67E-01 | 9.83E-01 |
| rs6558000  | 8 CHRNA2 | 0.12 Rec | 0.27(0.09-0.82) | 2.10E-02 | 2.86E-01 |
| rs751018   | 8 CHRNA2 | 0.19 Add | 1.3(1.05-1.62)  | 1.77E-02 | 4.04E-01 |
| rs1106359  | 8 CHRNA2 | 0.19 Add | 1.3(1.05-1.62)  | 1.77E-02 | 4.05E-01 |
| rs876891   | 8 CHRNA2 | 0.11 Rec | 0.29(0.09-0.9)  | 3.17E-02 | 4.19E-01 |
| rs919494   | 8 CHRNA2 | 0.19 Add | 1.28(1.03-1.59) | 2.50E-02 | 4.79E-01 |
| rs7007145  | 8 CHRNA2 | 0.19 Add | 1.28(1.03-1.59) | 2.50E-02 | 4.80E-01 |
| rs2565065  | 8 CHRNA2 | 0.19 Add | 1.28(1.03-1.6)  | 2.63E-02 | 4.95E-01 |
| rs10093964 | 8 CHRNA2 | 0.19 Add | 1.28(1.03-1.58) | 2.82E-02 | 5.17E-01 |
| rs2271920  | 8 CHRNA2 | 0.19 Add | 1.27(1.03-1.58) | 2.85E-02 | 5.18E-01 |
| rs2472554  | 8 CHRNA2 | 0.19 Add | 1.26(1.02-1.57) | 3.48E-02 | 5.28E-01 |
| rs2741343  | 8 CHRNA2 | 0.35 Add | 1.22(1.02-1.46) | 3.37E-02 | 5.70E-01 |
| rs1057137  | 8 CHRNA2 | 0.19 Add | 1.26(1.02-1.57) | 3.62E-02 | 5.86E-01 |
| rs2565067  | 8 CHRNA2 | 0.19 Add | 1.25(1-1.56)    | 5.15E-02 | 6.46E-01 |
| rs2741337  | 8 CHRNA2 | 0.20 Add | 0.81(0.65-1)    | 5.25E-02 | 6.46E-01 |
| rs2741338  | 8 CHRNA2 | 0.20 Add | 0.81(0.65-1)    | 5.25E-02 | 6.47E-01 |
| rs2741339  | 8 CHRNA2 | 0.20 Add | 0.8(0.65-1)     | 4.64E-02 | 6.52E-01 |
| rs891393   | 8 CHRNA2 | 0.50 Add | 1.19(1-1.41)    | 4.93E-02 | 6.59E-01 |

|           |          |          |                 |          |          |
|-----------|----------|----------|-----------------|----------|----------|
| rs2251430 | 8 CHRNA2 | 0.50 Add | 1.19(1-1.41)    | 4.93E-02 | 6.60E-01 |
| rs2565045 | 8 CHRNA2 | 0.19 Add | 1.24(1-1.55)    | 5.49E-02 | 6.63E-01 |
| rs2565059 | 8 CHRNA2 | 0.08 Dom | 0.75(0.54-1.05) | 9.92E-02 | 6.71E-01 |
| rs2741335 | 8 CHRNA2 | 0.20 Add | 0.82(0.66-1.01) | 6.18E-02 | 7.03E-01 |
| rs748282  | 8 CHRNA2 | 0.49 Add | 0.86(0.73-1.03) | 9.73E-02 | 7.07E-01 |
| rs1879182 | 8 CHRNA2 | 0.49 Add | 0.86(0.73-1.03) | 9.73E-02 | 7.07E-01 |
| rs1879181 | 8 CHRNA2 | 0.49 Add | 0.86(0.73-1.03) | 9.73E-02 | 7.07E-01 |
| rs2565055 | 8 CHRNA2 | 0.19 Add | 0.81(0.65-1.01) | 6.45E-02 | 7.12E-01 |
| rs2292977 | 8 CHRNA2 | 0.50 Add | 1.17(0.98-1.39) | 7.43E-02 | 7.18E-01 |
| rs748281  | 8 CHRNA2 | 0.49 Add | 0.87(0.73-1.03) | 1.04E-01 | 7.27E-01 |
| rs2280375 | 8 CHRNA2 | 0.49 Add | 0.87(0.73-1.03) | 1.04E-01 | 7.28E-01 |
| rs1879184 | 8 CHRNA2 | 0.49 Add | 0.86(0.73-1.02) | 9.27E-02 | 7.28E-01 |
| rs2565056 | 8 CHRNA2 | 0.19 Dom | 0.83(0.64-1.07) | 1.41E-01 | 7.31E-01 |
| rs1583092 | 8 CHRNA2 | 0.49 Add | 0.87(0.73-1.03) | 1.13E-01 | 7.56E-01 |
| rs2292976 | 8 CHRNA2 | 0.49 Add | 0.87(0.73-1.04) | 1.20E-01 | 7.77E-01 |
| rs891398  | 8 CHRNA2 | 0.37 Rec | 1.25(0.89-1.77) | 2.03E-01 | 8.21E-01 |
| rs3824103 | 8 CHRNA2 | 0.46 Dom | 0.82(0.63-1.07) | 1.38E-01 | 8.83E-01 |
| rs2565062 | 8 CHRNA2 | 0.47 Dom | 0.82(0.63-1.08) | 1.56E-01 | 9.12E-01 |
| rs891394  | 8 CHRNA2 | 0.20 Dom | 0.84(0.65-1.08) | 1.65E-01 | 9.24E-01 |
| rs1864375 | 8 CHRNA2 | 0.47 Add | 0.9(0.76-1.07)  | 2.48E-01 | 9.49E-01 |
| rs2741342 | 8 CHRNA2 | 0.46 Dom | 0.87(0.67-1.14) | 3.13E-01 | 9.54E-01 |
| rs2278319 | 8 CHRNA2 | 0.19 Dom | 0.87(0.67-1.12) | 2.83E-01 | 9.55E-01 |
| rs735421  | 8 CHRNA2 | 0.19 Dom | 0.87(0.68-1.12) | 2.83E-01 | 9.60E-01 |
| rs2565061 | 8 CHRNA2 | 0.46 Dom | 0.84(0.65-1.1)  | 2.06E-01 | 9.61E-01 |
| rs747111  | 8 CHRNA2 | 0.18 Dom | 0.85(0.66-1.1)  | 2.16E-01 | 9.66E-01 |
| rs2322584 | 8 CHRNA2 | 0.47 Dom | 0.85(0.65-1.11) | 2.28E-01 | 9.68E-01 |
| rs2163177 | 8 CHRNA2 | 0.47 Dom | 0.85(0.65-1.11) | 2.28E-01 | 9.68E-01 |
| rs2322583 | 8 CHRNA2 | 0.47 Dom | 0.85(0.65-1.11) | 2.28E-01 | 9.68E-01 |
| rs2043063 | 8 CHRNA2 | 0.47 Dom | 0.85(0.65-1.11) | 2.28E-01 | 9.68E-01 |
| rs2099166 | 8 CHRNA2 | 0.47 Add | 0.91(0.77-1.08) | 2.93E-01 | 9.69E-01 |
| rs3735757 | 8 CHRNA2 | 0.47 Dom | 0.85(0.65-1.11) | 2.43E-01 | 9.69E-01 |
| rs2280376 | 8 CHRNA2 | 0.19 Dom | 0.86(0.67-1.11) | 2.61E-01 | 9.70E-01 |
| rs9314347 | 8 CHRNA2 | 0.04 Add | 1.1(0.72-1.7)   | 6.56E-01 | 9.70E-01 |
| rs891399  | 8 CHRNA2 | 0.47 Rec | 0.89(0.66-1.19) | 4.16E-01 | 9.70E-01 |



|           |                         |          |                  |          |          |
|-----------|-------------------------|----------|------------------|----------|----------|
| rs2472553 | 8 CHRNA2                | 0.46 Dom | 0.86(0.66-1.12)  | 2.63E-01 | 9.70E-01 |
| rs751019  | 8 CHRNA2                | 0.31 Rec | 0.91(0.61-1.37)  | 6.59E-01 | 9.71E-01 |
| rs2322581 | 8 CHRNA2                | 0.47 Dom | 0.86(0.66-1.12)  | 2.55E-01 | 9.72E-01 |
| rs2292974 | 8 CHRNA2                | 0.31 Rec | 0.96(0.64-1.44)  | 8.40E-01 | 9.74E-01 |
| rs1560344 | 8 CHRNA2                | 0.31 Rec | 0.92(0.61-1.39)  | 6.96E-01 | 9.74E-01 |
| rs7815010 | 8 CHRNA2                | 0.45 Rec | 0.9(0.66-1.22)   | 4.85E-01 | 9.77E-01 |
| rs2292975 | 8 CHRNA2                | 0.31 Dom | 1.04(0.82-1.33)  | 7.24E-01 | 9.93E-01 |
| rs752993  | 8 CHRNA2                | 0.31 Dom | 1.04(0.82-1.33)  | 7.24E-01 | 9.93E-01 |
| rs4733065 | 8 CHRNA2                | 0.31 Rec | 0.96(0.64-1.43)  | 8.31E-01 | 9.94E-01 |
| rs748283  | 8 CHRNA2                | 0.31 Dom | 1.04(0.82-1.32)  | 7.44E-01 | 9.94E-01 |
| rs3787137 | 20 CHRNA4               | 0.36 Dom | 0.72(0.56-0.92)  | 8.64E-03 | 1.60E-01 |
| rs2273505 | 20 CHRNA4               | 0.13 Dom | 1.44(1.09-1.9)   | 1.12E-02 | 1.84E-01 |
| rs755204  | 20 CHRNA4               | 0.14 Dom | 1.42(1.08-1.87)  | 1.11E-02 | 1.86E-01 |
| rs3787140 | 20 CHRNA4               | 0.14 Dom | 1.41(1.07-1.86)  | 1.39E-02 | 2.17E-01 |
| rs6011776 | 20 CHRNA4               | 0.14 Dom | 1.41(1.07-1.86)  | 1.45E-02 | 2.23E-01 |
| rs3787138 | 20 CHRNA4               | 0.14 Dom | 1.38(1.05-1.81)  | 2.25E-02 | 2.82E-01 |
| rs1044396 | 20 CHRNA4               | 0.24 Rec | 1.86(1.1-3.15)   | 2.07E-02 | 2.96E-01 |
| rs755203  | 20 CHRNA4               | 0.36 Dom | 0.78(0.61-1)     | 5.09E-02 | 4.97E-01 |
| rs2236196 | 20 CHRNA4               | 0.14 Add | 1.24(0.98-1.57)  | 7.46E-02 | 5.48E-01 |
| rs4809549 | 20 CHRNA4               | 0.38 Add | 1.15(0.96-1.37)  | 1.21E-01 | 7.20E-01 |
| rs4522666 | 20 CHRNA4               | 0.43 Rec | 1.05(0.77-1.44)  | 7.47E-01 | 9.36E-01 |
| rs2273504 | 20 CHRNA4               | 0.48 Rec | 1.16(0.87-1.56)  | 3.04E-01 | 9.47E-01 |
| rs9680065 | 20 CHRNA4               | 0.42 Dom | 0.99(0.76-1.28)  | 9.25E-01 | 9.93E-01 |
| rs4603829 | 20 CHRNA4               | 0.42 Dom | 0.99(0.76-1.28)  | 9.25E-01 | 9.93E-01 |
| rs2093107 | 20 CHRNA4               | 0.50 Rec | 1.02(0.77-1.35)  | 8.84E-01 | 9.98E-01 |
| rs4809538 | 20 CHRNA4               | 0.41 Rec | 1.08(0.78-1.49)  | 6.42E-01 | 1.00E+00 |
| rs692780  | 15 CHRNA5_CHRNA3_CHRNB4 | 0.17 Rec | 2.7(1.34-5.43)   | 5.37E-03 | 2.28E-01 |
| rs871058  | 15 CHRNA5_CHRNA3_CHRNB4 | 0.11 Rec | 4.27(1.42-12.89) | 9.96E-03 | 2.91E-01 |
| rs495956  | 15 CHRNA5_CHRNA3_CHRNB4 | 0.22 Rec | 2.07(1.18-3.63)  | 1.13E-02 | 4.14E-01 |
| rs680244  | 15 CHRNA5_CHRNA3_CHRNB4 | 0.22 Rec | 1.98(1.14-3.46)  | 1.60E-02 | 5.20E-01 |
| rs621849  | 15 CHRNA5_CHRNA3_CHRNB4 | 0.23 Rec | 1.89(1.09-3.27)  | 2.40E-02 | 6.43E-01 |
| rs950776  | 15 CHRNA5_CHRNA3_CHRNB4 | 0.14 Rec | 2.47(1.12-5.48)  | 2.57E-02 | 6.44E-01 |
| rs514743  | 15 CHRNA5_CHRNA3_CHRNB4 | 0.17 Rec | 2.1(1.09-4.08)   | 2.74E-02 | 6.72E-01 |
| rs615470  | 15 CHRNA5_CHRNA3_CHRNB4 | 0.17 Rec | 2.1(1.09-4.08)   | 2.74E-02 | 6.72E-01 |

|            |                         |          |                 |          |          |
|------------|-------------------------|----------|-----------------|----------|----------|
| rs472054   | 15 CHRNA5_CHRNA3_CHRNB4 | 0.17 Rec | 2.1(1.09-4.08)  | 2.74E-02 | 6.73E-01 |
| rs660652   | 15 CHRNA5_CHRNA3_CHRNB4 | 0.17 Rec | 2.1(1.09-4.08)  | 2.74E-02 | 6.73E-01 |
| rs17408276 | 15 CHRNA5_CHRNA3_CHRNB4 | 0.17 Rec | 2.04(1.05-3.98) | 3.60E-02 | 7.62E-01 |
| rs7173512  | 15 CHRNA5_CHRNA3_CHRNB4 | 0.16 Rec | 2.11(0.99-4.5)  | 5.25E-02 | 8.68E-01 |
| rs4275821  | 15 CHRNA5_CHRNA3_CHRNB4 | 0.16 Rec | 2.11(0.99-4.5)  | 5.25E-02 | 8.68E-01 |
| rs11637635 | 15 CHRNA5_CHRNA3_CHRNB4 | 0.16 Rec | 2.03(0.98-4.22) | 5.78E-02 | 8.90E-01 |
| rs601079   | 15 CHRNA5_CHRNA3_CHRNB4 | 0.23 Rec | 1.71(0.98-2.98) | 5.88E-02 | 8.97E-01 |
| rs555018   | 15 CHRNA5_CHRNA3_CHRNB4 | 0.17 Add | 1.2(0.95-1.5)   | 1.18E-01 | 9.32E-01 |
| rs481134   | 15 CHRNA5_CHRNA3_CHRNB4 | 0.16 Add | 1.2(0.95-1.5)   | 1.24E-01 | 9.39E-01 |
| rs2869546  | 15 CHRNA5_CHRNA3_CHRNB4 | 0.19 Rec | 1.72(0.91-3.23) | 9.44E-02 | 9.67E-01 |
| rs6495306  | 15 CHRNA5_CHRNA3_CHRNB4 | 0.17 Add | 1.18(0.94-1.48) | 1.58E-01 | 9.71E-01 |
| rs588765   | 15 CHRNA5_CHRNA3_CHRNB4 | 0.17 Add | 1.18(0.94-1.48) | 1.58E-01 | 9.71E-01 |
| rs1317286  | 15 CHRNA5_CHRNA3_CHRNB4 | 0.10 Add | 0.82(0.61-1.11) | 2.05E-01 | 9.74E-01 |
| rs6495307  | 15 CHRNA5_CHRNA3_CHRNB4 | 0.18 Rec | 1.66(0.89-3.1)  | 1.13E-01 | 9.81E-01 |
| rs7178270  | 15 CHRNA5_CHRNA3_CHRNB4 | 0.38 Rec | 1(0.71-1.42)    | 9.85E-01 | 9.85E-01 |
| rs3971872  | 15 CHRNA5_CHRNA3_CHRNB4 | 0.20 Rec | 1.44(0.78-2.66) | 2.50E-01 | 9.90E-01 |
| rs647041   | 15 CHRNA5_CHRNA3_CHRNB4 | 0.18 Rec | 1.58(0.84-2.98) | 1.56E-01 | 9.95E-01 |
| rs518425   | 15 CHRNA5_CHRNA3_CHRNB4 | 0.21 Rec | 1.48(0.86-2.56) | 1.59E-01 | 9.95E-01 |
| rs578776   | 15 CHRNA5_CHRNA3_CHRNB4 | 0.21 Rec | 1.48(0.86-2.56) | 1.59E-01 | 9.95E-01 |
| rs7180002  | 15 CHRNA5_CHRNA3_CHRNB4 | 0.04 Add | 0.79(0.49-1.27) | 3.35E-01 | 9.98E-01 |
| rs11633223 | 15 CHRNA5_CHRNA3_CHRNB4 | 0.09 Dom | 0.84(0.61-1.17) | 3.08E-01 | 9.98E-01 |
| rs951266   | 15 CHRNA5_CHRNA3_CHRNB4 | 0.04 Add | 0.79(0.49-1.28) | 3.48E-01 | 9.99E-01 |
| rs11072768 | 15 CHRNA5_CHRNA3_CHRNB4 | 0.21 Dom | 0.85(0.66-1.1)  | 2.12E-01 | 9.99E-01 |
| rs12441998 | 15 CHRNA5_CHRNA3_CHRNB4 | 0.21 Dom | 0.85(0.66-1.1)  | 2.12E-01 | 9.99E-01 |
| rs1875869  | 15 CHRNA5_CHRNA3_CHRNB4 | 0.06 Add | 0.85(0.59-1.23) | 3.94E-01 | 9.99E-01 |
| rs16969948 | 15 CHRNA5_CHRNA3_CHRNB4 | 0.06 Add | 0.85(0.59-1.23) | 3.94E-01 | 9.99E-01 |
| rs10519205 | 15 CHRNA5_CHRNA3_CHRNB4 | 0.06 Add | 0.85(0.59-1.23) | 3.94E-01 | 9.99E-01 |
| rs16969968 | 15 CHRNA5_CHRNA3_CHRNB4 | 0.04 Add | 0.8(0.5-1.3)    | 3.74E-01 | 9.99E-01 |
| rs7178897  | 15 CHRNA5_CHRNA3_CHRNB4 | 0.06 Add | 0.85(0.59-1.23) | 3.94E-01 | 9.99E-01 |
| rs16969949 | 15 CHRNA5_CHRNA3_CHRNB4 | 0.06 Add | 0.85(0.59-1.23) | 3.94E-01 | 9.99E-01 |
| rs1051730  | 15 CHRNA5_CHRNA3_CHRNB4 | 0.03 Add | 0.8(0.48-1.34)  | 3.99E-01 | 9.99E-01 |
| rs11636753 | 15 CHRNA5_CHRNA3_CHRNB4 | 0.17 Dom | 0.85(0.66-1.11) | 2.27E-01 | 9.99E-01 |
| rs7163480  | 15 CHRNA5_CHRNA3_CHRNB4 | 0.06 Add | 0.86(0.6-1.24)  | 4.11E-01 | 9.99E-01 |
| rs1316971  | 15 CHRNA5_CHRNA3_CHRNB4 | 0.21 Add | 0.89(0.73-1.1)  | 2.75E-01 | 9.99E-01 |

|            |                         |      |     |                 |          |          |
|------------|-------------------------|------|-----|-----------------|----------|----------|
| rs12910984 | 15 CHRNA5_CHRNA3_CHRNB4 | 0.47 | Dom | 1.02(0.78-1.34) | 8.65E-01 | 1.00E+00 |
| rs12440014 | 15 CHRNA5_CHRNA3_CHRNB4 | 0.48 | Rec | 1.18(0.89-1.57) | 2.52E-01 | 1.00E+00 |
| rs8040868  | 15 CHRNA5_CHRNA3_CHRNB4 | 0.34 | Dom | 0.87(0.68-1.11) | 2.58E-01 | 1.00E+00 |
| rs637137   | 15 CHRNA5_CHRNA3_CHRNB4 | 0.49 | Add | 0.93(0.78-1.1)  | 3.89E-01 | 1.00E+00 |
| rs569207   | 15 CHRNA5_CHRNA3_CHRNB4 | 0.49 | Add | 0.93(0.78-1.11) | 4.30E-01 | 1.00E+00 |
| rs8042059  | 15 CHRNA5_CHRNA3_CHRNB4 | 0.28 | Rec | 1.28(0.82-2)    | 2.79E-01 | 1.00E+00 |
| rs6495308  | 15 CHRNA5_CHRNA3_CHRNB4 | 0.28 | Rec | 1.28(0.82-2)    | 2.79E-01 | 1.00E+00 |
| rs8042374  | 15 CHRNA5_CHRNA3_CHRNB4 | 0.28 | Rec | 1.28(0.82-2)    | 2.79E-01 | 1.00E+00 |
| rs7177514  | 15 CHRNA5_CHRNA3_CHRNB4 | 0.28 | Rec | 1.28(0.82-2)    | 2.79E-01 | 1.00E+00 |
| rs4887069  | 15 CHRNA5_CHRNA3_CHRNB4 | 0.28 | Rec | 1.28(0.82-2)    | 2.79E-01 | 1.00E+00 |
| rs2036527  | 15 CHRNA5_CHRNA3_CHRNB4 | 0.04 | Add | 0.85(0.53-1.37) | 4.97E-01 | 1.00E+00 |
| rs684513   | 15 CHRNA5_CHRNA3_CHRNB4 | 0.26 | Rec | 0.77(0.46-1.27) | 3.03E-01 | 1.00E+00 |
| rs17486278 | 15 CHRNA5_CHRNA3_CHRNB4 | 0.28 | Add | 1.01(0.83-1.23) | 9.48E-01 | 1.00E+00 |
| rs667282   | 15 CHRNA5_CHRNA3_CHRNB4 | 0.50 | Add | 0.93(0.79-1.11) | 4.41E-01 | 1.00E+00 |
| rs11636605 | 15 CHRNA5_CHRNA3_CHRNB4 | 0.20 | Dom | 0.89(0.69-1.14) | 3.45E-01 | 1.00E+00 |
| rs1878399  | 15 CHRNA5_CHRNA3_CHRNB4 | 0.18 | Rec | 1.37(0.73-2.58) | 3.32E-01 | 1.00E+00 |
| rs938682   | 15 CHRNA5_CHRNA3_CHRNB4 | 0.47 | Rec | 1.01(0.76-1.36) | 9.27E-01 | 1.00E+00 |
| rs3743075  | 15 CHRNA5_CHRNA3_CHRNB4 | 0.43 | Add | 1.06(0.89-1.26) | 4.89E-01 | 1.00E+00 |
| rs3743074  | 15 CHRNA5_CHRNA3_CHRNB4 | 0.43 | Add | 1.06(0.89-1.26) | 5.13E-01 | 1.00E+00 |
| rs1948     | 15 CHRNA5_CHRNA3_CHRNB4 | 0.46 | Rec | 0.99(0.73-1.33) | 9.23E-01 | 1.00E+00 |
| rs3743076  | 15 CHRNA5_CHRNA3_CHRNB4 | 0.24 | Rec | 1.23(0.7-2.15)  | 4.75E-01 | 1.00E+00 |
| rs3743073  | 15 CHRNA5_CHRNA3_CHRNB4 | 0.44 | Dom | 1.01(0.78-1.31) | 9.21E-01 | 1.00E+00 |
| rs17487223 | 15 CHRNA5_CHRNA3_CHRNB4 | 0.03 | Add | 0.93(0.55-1.57) | 7.77E-01 | 1.00E+00 |
| rs6495309  | 15 CHRNA5_CHRNA3_CHRNB4 | 0.47 | Rec | 1.09(0.81-1.46) | 5.65E-01 | 1.00E+00 |
| rs3743072  | 15 CHRNA5_CHRNA3_CHRNB4 | 0.06 | Add | 1.02(0.71-1.47) | 9.18E-01 | 1.00E+00 |
| rs11637630 | 15 CHRNA5_CHRNA3_CHRNB4 | 0.48 | Dom | 1.01(0.77-1.33) | 9.15E-01 | 1.00E+00 |
| rs11072773 | 15 CHRNA5_CHRNA3_CHRNB4 | 0.02 | Dom | 1.06(0.58-1.93) | 8.60E-01 | 1.00E+00 |
| rs12914385 | 15 CHRNA5_CHRNA3_CHRNB4 | 0.27 | Rec | 1.04(0.63-1.7)  | 8.87E-01 | 1.00E+00 |
| rs3743078  | 15 CHRNA5_CHRNA3_CHRNB4 | 0.22 | Rec | 1.13(0.67-1.9)  | 6.52E-01 | 1.00E+00 |
| rs4779956  | 15 CHRNA7               | 0.05 | Add | 0.71(0.48-1.06) | 9.77E-02 | 8.96E-01 |
| rs12904275 | 15 CHRNA7               | 0.08 | Add | 0.77(0.56-1.05) | 9.44E-02 | 9.09E-01 |
| rs12899561 | 15 CHRNA7               | 0.08 | Add | 0.77(0.56-1.05) | 9.44E-02 | 9.10E-01 |
| rs6494216  | 15 CHRNA7               | 0.07 | Dom | 0.77(0.54-1.1)  | 1.45E-01 | 9.54E-01 |
| rs4779975  | 15 CHRNA7               | 0.06 | Add | 0.75(0.51-1.09) | 1.30E-01 | 9.55E-01 |

|            |           |          |                 |          |          |
|------------|-----------|----------|-----------------|----------|----------|
| rs7179733  | 15 CHRNA7 | 0.17 Rec | 2.05(0.92-4.56) | 7.81E-02 | 9.62E-01 |
| rs4779565  | 15 CHRNA7 | 0.35 Rec | 1.01(0.7-1.45)  | 9.69E-01 | 9.69E-01 |
| rs965435   | 15 CHRNA7 | 0.17 Rec | 2(0.9-4.45)     | 8.79E-02 | 9.75E-01 |
| rs8030315  | 15 CHRNA7 | 0.07 Dom | 0.78(0.54-1.12) | 1.74E-01 | 9.76E-01 |
| rs2651417  | 15 CHRNA7 | 0.40 Dom | 1.24(0.96-1.59) | 9.78E-02 | 9.84E-01 |
| rs12593470 | 15 CHRNA7 | 0.08 Add | 0.8(0.58-1.1)   | 1.65E-01 | 9.84E-01 |
| rs12591836 | 15 CHRNA7 | 0.08 Add | 0.8(0.58-1.1)   | 1.65E-01 | 9.84E-01 |
| rs8036104  | 15 CHRNA7 | 0.07 Dom | 0.79(0.55-1.13) | 1.96E-01 | 9.85E-01 |
| rs9788657  | 15 CHRNA7 | 0.07 Dom | 0.79(0.55-1.13) | 1.96E-01 | 9.85E-01 |
| rs8035668  | 15 CHRNA7 | 0.07 Dom | 0.79(0.55-1.13) | 1.96E-01 | 9.85E-01 |
| rs8024987  | 15 CHRNA7 | 0.16 Add | 1.22(0.96-1.55) | 1.04E-01 | 9.89E-01 |
| rs9788679  | 15 CHRNA7 | 0.06 Dom | 0.79(0.55-1.14) | 2.14E-01 | 9.89E-01 |
| rs1500948  | 15 CHRNA7 | 0.06 Dom | 0.79(0.55-1.14) | 2.14E-01 | 9.89E-01 |
| rs883473   | 15 CHRNA7 | 0.17 Rec | 1.87(0.86-4.09) | 1.14E-01 | 9.90E-01 |
| rs868437   | 15 CHRNA7 | 0.17 Rec | 1.87(0.86-4.09) | 1.14E-01 | 9.91E-01 |
| rs965434   | 15 CHRNA7 | 0.07 Add | 0.81(0.58-1.12) | 1.94E-01 | 9.91E-01 |
| rs12900540 | 15 CHRNA7 | 0.07 Add | 0.81(0.58-1.12) | 1.94E-01 | 9.91E-01 |
| rs1514247  | 15 CHRNA7 | 0.07 Add | 0.81(0.58-1.12) | 1.94E-01 | 9.91E-01 |
| rs16956132 | 15 CHRNA7 | 0.07 Add | 0.81(0.58-1.12) | 1.94E-01 | 9.91E-01 |
| rs16956147 | 15 CHRNA7 | 0.07 Add | 0.81(0.58-1.12) | 1.94E-01 | 9.91E-01 |
| rs2651418  | 15 CHRNA7 | 0.42 Dom | 1.22(0.95-1.57) | 1.23E-01 | 9.92E-01 |
| rs8037084  | 15 CHRNA7 | 0.07 Dom | 0.8(0.56-1.15)  | 2.32E-01 | 9.92E-01 |
| rs10438342 | 15 CHRNA7 | 0.06 Dom | 0.8(0.55-1.16)  | 2.38E-01 | 9.95E-01 |
| rs11071503 | 15 CHRNA7 | 0.25 Rec | 1.09(0.65-1.82) | 7.57E-01 | 9.97E-01 |
| rs4779563  | 15 CHRNA7 | 0.25 Rec | 1.09(0.65-1.82) | 7.57E-01 | 9.97E-01 |
| rs7164518  | 15 CHRNA7 | 0.09 Add | 0.85(0.62-1.15) | 2.85E-01 | 9.97E-01 |
| rs11071518 | 15 CHRNA7 | 0.07 Add | 0.82(0.59-1.15) | 2.52E-01 | 9.97E-01 |
| rs1500946  | 15 CHRNA7 | 0.04 Add | 0.79(0.52-1.21) | 2.87E-01 | 9.97E-01 |
| rs11852956 | 15 CHRNA7 | 0.04 Add | 0.79(0.52-1.21) | 2.87E-01 | 9.97E-01 |
| rs11858834 | 15 CHRNA7 | 0.04 Add | 0.79(0.52-1.21) | 2.87E-01 | 9.97E-01 |
| rs35057608 | 15 CHRNA7 | 0.04 Add | 0.79(0.52-1.21) | 2.87E-01 | 9.97E-01 |
| rs12915265 | 15 CHRNA7 | 0.04 Add | 0.79(0.52-1.21) | 2.87E-01 | 9.97E-01 |
| rs7175359  | 15 CHRNA7 | 0.30 Dom | 1.19(0.93-1.51) | 1.60E-01 | 9.97E-01 |
| rs7170028  | 15 CHRNA7 | 0.30 Dom | 1.19(0.93-1.51) | 1.60E-01 | 9.97E-01 |

|            |           |          |                 |          |          |
|------------|-----------|----------|-----------------|----------|----------|
| rs12915695 | 15 CHRNA7 | 0.05 Add | 0.8(0.53-1.21)  | 2.90E-01 | 9.97E-01 |
| rs7179008  | 15 CHRNA7 | 0.09 Add | 0.84(0.62-1.14) | 2.62E-01 | 9.97E-01 |
| rs7178176  | 15 CHRNA7 | 0.09 Add | 0.84(0.62-1.14) | 2.62E-01 | 9.97E-01 |
| rs2175886  | 15 CHRNA7 | 0.17 Rec | 1.73(0.81-3.7)  | 1.61E-01 | 9.97E-01 |
| rs904951   | 15 CHRNA7 | 0.29 Dom | 1.18(0.93-1.51) | 1.68E-01 | 9.97E-01 |
| rs8025554  | 15 CHRNA7 | 0.29 Dom | 1.18(0.93-1.51) | 1.68E-01 | 9.97E-01 |
| rs6494212  | 15 CHRNA7 | 0.11 Dom | 0.81(0.6-1.09)  | 1.63E-01 | 9.97E-01 |
| rs10438287 | 15 CHRNA7 | 0.04 Dom | 0.8(0.52-1.24)  | 3.19E-01 | 9.97E-01 |
| rs904952   | 15 CHRNA7 | 0.30 Add | 1.14(0.95-1.36) | 1.71E-01 | 9.98E-01 |
| rs12904458 | 15 CHRNA7 | 0.30 Add | 1.14(0.95-1.36) | 1.71E-01 | 9.98E-01 |
| rs11071515 | 15 CHRNA7 | 0.07 Add | 0.84(0.6-1.17)  | 2.98E-01 | 9.98E-01 |
| rs8027814  | 15 CHRNA7 | 0.19 Rec | 1.53(0.76-3.05) | 2.30E-01 | 9.99E-01 |
| rs12906868 | 15 CHRNA7 | 0.12 Dom | 0.83(0.62-1.12) | 2.23E-01 | 9.99E-01 |
| rs8037484  | 15 CHRNA7 | 0.25 Dom | 1.01(0.79-1.29) | 9.38E-01 | 1.00E+00 |
| rs3826029  | 15 CHRNA7 | 0.38 Rec | 1.18(0.83-1.66) | 3.53E-01 | 1.00E+00 |
| rs1604265  | 15 CHRNA7 | 0.21 Rec | 0.83(0.47-1.45) | 5.15E-01 | 1.00E+00 |
| rs1514250  | 15 CHRNA7 | 0.21 Rec | 0.83(0.47-1.45) | 5.15E-01 | 1.00E+00 |
| rs1514248  | 15 CHRNA7 | 0.21 Rec | 0.83(0.47-1.45) | 5.15E-01 | 1.00E+00 |
| rs982574   | 15 CHRNA7 | 0.21 Rec | 0.83(0.47-1.45) | 5.15E-01 | 1.00E+00 |
| rs12914788 | 15 CHRNA7 | 0.21 Rec | 0.83(0.47-1.45) | 5.15E-01 | 1.00E+00 |
| rs4779968  | 15 CHRNA7 | 0.25 Rec | 1.1(0.66-1.83)  | 7.20E-01 | 1.00E+00 |
| rs12440000 | 15 CHRNA7 | 0.02 Dom | 0.81(0.4-1.63)  | 5.49E-01 | 1.00E+00 |
| rs1392808  | 15 CHRNA7 | 0.02 Dom | 0.81(0.4-1.63)  | 5.49E-01 | 1.00E+00 |
| rs16956223 | 15 CHRNA7 | 0.02 Dom | 0.81(0.4-1.63)  | 5.49E-01 | 1.00E+00 |
| rs2221223  | 15 CHRNA7 | 0.02 Dom | 0.81(0.4-1.63)  | 5.49E-01 | 1.00E+00 |
| rs13329490 | 15 CHRNA7 | 0.02 Dom | 0.81(0.4-1.63)  | 5.49E-01 | 1.00E+00 |
| rs11071530 | 15 CHRNA7 | 0.20 Rec | 0.73(0.4-1.33)  | 3.05E-01 | 1.00E+00 |
| rs12440480 | 15 CHRNA7 | 0.30 Dom | 1.12(0.88-1.43) | 3.50E-01 | 1.00E+00 |
| rs8027034  | 15 CHRNA7 | 0.13 Dom | 1.03(0.78-1.37) | 8.17E-01 | 1.00E+00 |
| rs1514246  | 15 CHRNA7 | 0.18 Rec | 1.48(0.71-3.05) | 2.92E-01 | 1.00E+00 |
| rs1355920  | 15 CHRNA7 | 0.20 Add | 0.93(0.75-1.14) | 4.88E-01 | 1.00E+00 |
| rs2133965  | 15 CHRNA7 | 0.20 Add | 0.9(0.73-1.11)  | 3.30E-01 | 1.00E+00 |
| rs11637923 | 15 CHRNA7 | 0.38 Rec | 1.16(0.82-1.63) | 4.00E-01 | 1.00E+00 |
| rs885071   | 15 CHRNA7 | 0.38 Rec | 1.16(0.82-1.64) | 4.03E-01 | 1.00E+00 |

|            |           |          |                 |          |          |
|------------|-----------|----------|-----------------|----------|----------|
| rs7175581  | 15 CHRNA7 | 0.42 Dom | 0.95(0.73-1.22) | 6.66E-01 | 1.00E+00 |
| rs2337980  | 15 CHRNA7 | 0.24 Rec | 0.77(0.44-1.32) | 3.38E-01 | 1.00E+00 |
| rs12916592 | 15 CHRNA7 | 0.20 Rec | 0.75(0.42-1.34) | 3.32E-01 | 1.00E+00 |
| rs11071532 | 15 CHRNA7 | 0.20 Rec | 0.75(0.42-1.34) | 3.32E-01 | 1.00E+00 |
| rs8027035  | 15 CHRNA7 | 0.20 Rec | 0.75(0.42-1.34) | 3.32E-01 | 1.00E+00 |
| rs11635941 | 15 CHRNA7 | 0.38 Rec | 1.15(0.82-1.63) | 4.14E-01 | 1.00E+00 |
| rs6494211  | 15 CHRNA7 | 0.38 Rec | 1.15(0.82-1.61) | 4.22E-01 | 1.00E+00 |
| rs4779971  | 15 CHRNA7 | 0.25 Dom | 1.03(0.8-1.31)  | 8.41E-01 | 1.00E+00 |
| rs6494223  | 15 CHRNA7 | 0.42 Rec | 0.89(0.64-1.22) | 4.62E-01 | 1.00E+00 |
| rs11071511 | 15 CHRNA7 | 0.13 Rec | 1.11(0.49-2.48) | 8.02E-01 | 1.00E+00 |
| rs8035663  | 15 CHRNA7 | 0.13 Rec | 1.11(0.49-2.48) | 8.02E-01 | 1.00E+00 |
| rs6494185  | 15 CHRNA7 | 0.13 Rec | 1.11(0.49-2.48) | 8.02E-01 | 1.00E+00 |
| rs1913459  | 15 CHRNA7 | 0.13 Rec | 1.11(0.49-2.48) | 8.02E-01 | 1.00E+00 |
| rs6494165  | 15 CHRNA7 | 0.13 Rec | 1.11(0.49-2.48) | 8.02E-01 | 1.00E+00 |
| rs11071512 | 15 CHRNA7 | 0.13 Rec | 1.11(0.49-2.48) | 8.02E-01 | 1.00E+00 |
| rs11635209 | 15 CHRNA7 | 0.13 Rec | 1.11(0.49-2.48) | 8.02E-01 | 1.00E+00 |
| rs6494182  | 15 CHRNA7 | 0.13 Rec | 1.11(0.49-2.48) | 8.02E-01 | 1.00E+00 |
| rs1606659  | 15 CHRNA7 | 0.38 Rec | 1.14(0.8-1.61)  | 4.71E-01 | 1.00E+00 |
| rs1913456  | 15 CHRNA7 | 0.38 Rec | 1.14(0.8-1.61)  | 4.71E-01 | 1.00E+00 |
| rs9672321  | 15 CHRNA7 | 0.38 Rec | 1.14(0.8-1.61)  | 4.71E-01 | 1.00E+00 |
| rs4779970  | 15 CHRNA7 | 0.13 Dom | 1.03(0.77-1.36) | 8.58E-01 | 1.00E+00 |
| rs4779969  | 15 CHRNA7 | 0.13 Dom | 1.03(0.77-1.36) | 8.58E-01 | 1.00E+00 |
| rs8033518  | 15 CHRNA7 | 0.13 Dom | 1.02(0.77-1.36) | 8.70E-01 | 1.00E+00 |
| rs12438848 | 15 CHRNA7 | 0.35 Dom | 1.05(0.82-1.33) | 7.18E-01 | 1.00E+00 |
| rs8028396  | 15 CHRNA7 | 0.42 Rec | 0.9(0.65-1.24)  | 5.21E-01 | 1.00E+00 |
| rs8029400  | 15 CHRNA7 | 0.42 Rec | 0.9(0.65-1.24)  | 5.21E-01 | 1.00E+00 |
| rs7402321  | 15 CHRNA7 | 0.34 Add | 0.95(0.8-1.14)  | 6.04E-01 | 1.00E+00 |
| rs9427094  | 1 CHRNB2  | 0.46 Add | 0.83(0.7-0.98)  | 2.56E-02 | 3.06E-01 |
| rs1127311  | 1 CHRNB2  | 0.45 Add | 0.83(0.7-0.98)  | 2.60E-02 | 3.08E-01 |
| rs1127313  | 1 CHRNB2  | 0.45 Add | 0.83(0.7-0.98)  | 2.60E-02 | 3.08E-01 |
| rs2072660  | 1 CHRNB2  | 0.26 Add | 0.79(0.64-0.96) | 2.08E-02 | 3.10E-01 |
| rs2072661  | 1 CHRNB2  | 0.27 Add | 0.8(0.65-0.97)  | 2.43E-02 | 3.44E-01 |
| rs2072658  | 1 CHRNB2  | 0.19 Rec | 1.87(1.06-3.27) | 2.96E-02 | 3.86E-01 |
| rs3811450  | 1 CHRNB2  | 0.17 Dom | 0.76(0.58-0.98) | 3.79E-02 | 3.93E-01 |

|            |   |               |      |     |                 |          |          |
|------------|---|---------------|------|-----|-----------------|----------|----------|
| rs9427092  | 1 | CHRNA2        | 0.21 | Add | 1.25(1.01-1.54) | 3.67E-02 | 4.28E-01 |
| rs2131902  | 1 | CHRNA2        | 0.29 | Dom | 0.79(0.62-1.01) | 5.98E-02 | 4.91E-01 |
| rs1127326  | 1 | CHRNA2        | 0.28 | Add | 0.83(0.68-1.01) | 6.15E-02 | 5.06E-01 |
| rs11264222 | 1 | CHRNA2        | 0.28 | Add | 0.83(0.68-1.01) | 6.15E-02 | 5.06E-01 |
| rs1127314  | 1 | CHRNA2        | 0.28 | Add | 0.83(0.68-1.01) | 6.47E-02 | 5.23E-01 |
| rs1127317  | 1 | CHRNA2        | 0.28 | Add | 0.83(0.68-1.01) | 6.47E-02 | 5.23E-01 |
| rs6656743  | 1 | CHRNA2        | 0.28 | Add | 0.83(0.69-1.01) | 6.74E-02 | 5.31E-01 |
| rs3766927  | 1 | CHRNA2        | 0.28 | Add | 0.83(0.69-1.01) | 6.71E-02 | 5.34E-01 |
| rs2072659  | 1 | CHRNA2        | 0.20 | Dom | 0.82(0.64-1.06) | 1.29E-01 | 6.33E-01 |
| rs7543174  | 1 | CHRNA2        | 0.14 | Add | 1.18(0.92-1.51) | 1.87E-01 | 6.58E-01 |
| rs9616     | 1 | CHRNA2        | 0.34 | Rec | 1.34(0.92-1.94) | 1.25E-01 | 7.08E-01 |
| rs4845652  | 1 | CHRNA2        | 0.14 | Rec | 0.7(0.26-1.93)  | 4.97E-01 | 7.41E-01 |
| rs6660775  | 1 | CHRNA2        | 0.14 | Rec | 0.7(0.26-1.93)  | 4.97E-01 | 7.41E-01 |
| rs7553602  | 1 | CHRNA2        | 0.12 | Dom | 1.17(0.88-1.56) | 2.80E-01 | 7.74E-01 |
| rs7539745  | 1 | CHRNA2        | 0.12 | Dom | 1.16(0.87-1.54) | 3.04E-01 | 8.00E-01 |
| rs4074436  | 1 | CHRNA2        | 0.12 | Dom | 1.11(0.83-1.49) | 4.70E-01 | 9.21E-01 |
| rs10107450 | 8 | CHRNA3_CHRNA6 | 0.20 | Add | 1.26(1.01-1.57) | 3.66E-02 | 2.12E-01 |
| rs2217732  | 8 | CHRNA3_CHRNA6 | 0.22 | Add | 1.22(0.99-1.5)  | 5.89E-02 | 3.01E-01 |
| rs1072003  | 8 | CHRNA3_CHRNA6 | 0.22 | Add | 1.22(0.99-1.5)  | 5.89E-02 | 3.01E-01 |
| rs2196128  | 8 | CHRNA3_CHRNA6 | 0.22 | Add | 1.22(0.99-1.5)  | 5.89E-02 | 3.01E-01 |
| rs10109429 | 8 | CHRNA3_CHRNA6 | 0.22 | Add | 1.22(0.99-1.5)  | 5.89E-02 | 3.01E-01 |
| rs10087172 | 8 | CHRNA3_CHRNA6 | 0.22 | Add | 1.22(0.99-1.5)  | 5.89E-02 | 3.01E-01 |
| rs892413   | 8 | CHRNA3_CHRNA6 | 0.22 | Add | 1.22(0.99-1.5)  | 6.01E-02 | 3.05E-01 |
| rs2304297  | 8 | CHRNA3_CHRNA6 | 0.22 | Add | 1.22(0.99-1.5)  | 6.01E-02 | 3.05E-01 |
| rs7845663  | 8 | CHRNA3_CHRNA6 | 0.22 | Add | 1.22(0.99-1.5)  | 6.01E-02 | 3.05E-01 |
| rs7812298  | 8 | CHRNA3_CHRNA6 | 0.22 | Add | 1.22(0.99-1.5)  | 6.01E-02 | 3.05E-01 |
| rs7824155  | 8 | CHRNA3_CHRNA6 | 0.22 | Add | 1.22(0.99-1.5)  | 6.01E-02 | 3.05E-01 |
| rs4950     | 8 | CHRNA3_CHRNA6 | 0.22 | Add | 1.19(0.97-1.46) | 1.02E-01 | 3.08E-01 |
| rs1530848  | 8 | CHRNA3_CHRNA6 | 0.22 | Add | 1.19(0.97-1.46) | 1.02E-01 | 3.08E-01 |
| rs1451240  | 8 | CHRNA3_CHRNA6 | 0.22 | Add | 1.19(0.97-1.46) | 1.02E-01 | 3.08E-01 |
| rs13273442 | 8 | CHRNA3_CHRNA6 | 0.22 | Add | 1.19(0.97-1.46) | 1.02E-01 | 3.08E-01 |
| rs1955185  | 8 | CHRNA3_CHRNA6 | 0.22 | Add | 1.19(0.97-1.46) | 1.02E-01 | 3.08E-01 |
| rs13280604 | 8 | CHRNA3_CHRNA6 | 0.22 | Add | 1.19(0.97-1.46) | 1.02E-01 | 3.08E-01 |
| rs1451239  | 8 | CHRNA3_CHRNA6 | 0.22 | Add | 1.19(0.97-1.46) | 1.02E-01 | 3.08E-01 |

|            |                 |          |                 |          |          |
|------------|-----------------|----------|-----------------|----------|----------|
| rs7004381  | 8 CHRNB3_CHRNA6 | 0.22 Add | 1.19(0.97-1.46) | 1.02E-01 | 3.08E-01 |
| rs1530847  | 8 CHRNB3_CHRNA6 | 0.22 Add | 1.19(0.97-1.46) | 1.02E-01 | 3.08E-01 |
| rs6474412  | 8 CHRNB3_CHRNA6 | 0.22 Add | 1.19(0.97-1.46) | 1.02E-01 | 3.08E-01 |
| rs9298629  | 8 CHRNB3_CHRNA6 | 0.22 Add | 1.22(0.99-1.5)  | 6.14E-02 | 3.09E-01 |
| rs6982753  | 8 CHRNB3_CHRNA6 | 0.22 Add | 1.22(0.99-1.5)  | 6.14E-02 | 3.09E-01 |
| rs9298628  | 8 CHRNB3_CHRNA6 | 0.22 Add | 1.22(0.99-1.5)  | 6.14E-02 | 3.10E-01 |
| rs6474419  | 8 CHRNB3_CHRNA6 | 0.20 Add | 1.22(0.99-1.51) | 6.42E-02 | 3.18E-01 |
| rs7017612  | 8 CHRNB3_CHRNA6 | 0.22 Dom | 1.24(0.97-1.58) | 8.88E-02 | 3.31E-01 |
| rs16891561 | 8 CHRNB3_CHRNA6 | 0.22 Dom | 1.24(0.97-1.58) | 8.88E-02 | 3.31E-01 |
| rs4236926  | 8 CHRNB3_CHRNA6 | 0.22 Dom | 1.24(0.97-1.58) | 8.88E-02 | 3.31E-01 |
| rs6474415  | 8 CHRNB3_CHRNA6 | 0.22 Add | 1.19(0.97-1.47) | 9.42E-02 | 3.50E-01 |
| rs6997909  | 8 CHRNB3_CHRNA6 | 0.22 Add | 1.19(0.97-1.47) | 9.42E-02 | 3.50E-01 |
| rs6474414  | 8 CHRNB3_CHRNA6 | 0.22 Add | 1.19(0.97-1.47) | 9.42E-02 | 3.50E-01 |
| rs10109040 | 8 CHRNB3_CHRNA6 | 0.20 Add | 1.21(0.98-1.5)  | 8.22E-02 | 3.57E-01 |
| rs16891569 | 8 CHRNB3_CHRNA6 | 0.02 Add | 1.22(0.63-2.36) | 5.49E-01 | 5.90E-01 |
| rs6517254  | 21 CLIC6        | 0.21 Dom | 1.34(1.04-1.72) | 2.18E-02 | 2.89E-01 |
| rs2070367  | 21 CLIC6        | 0.22 Dom | 1.32(1.03-1.69) | 2.93E-02 | 3.56E-01 |
| rs2834593  | 21 CLIC6        | 0.20 Dom | 1.32(1.02-1.69) | 3.21E-02 | 3.74E-01 |
| rs11702251 | 21 CLIC6        | 0.21 Dom | 1.32(1.02-1.69) | 3.24E-02 | 3.75E-01 |
| rs11088294 | 21 CLIC6        | 0.30 Dom | 0.79(0.62-1)    | 5.46E-02 | 5.24E-01 |
| rs7281533  | 21 CLIC6        | 0.18 Add | 1.22(0.98-1.53) | 7.76E-02 | 5.43E-01 |
| rs2834573  | 21 CLIC6        | 0.18 Add | 1.21(0.97-1.51) | 9.06E-02 | 5.96E-01 |
| rs2834572  | 21 CLIC6        | 0.18 Add | 1.21(0.97-1.51) | 9.06E-02 | 5.96E-01 |
| rs2834574  | 21 CLIC6        | 0.18 Add | 1.21(0.97-1.51) | 9.06E-02 | 5.96E-01 |
| rs2834599  | 21 CLIC6        | 0.39 Dom | 1.12(0.87-1.44) | 3.70E-01 | 6.02E-01 |
| rs2834577  | 21 CLIC6        | 0.18 Add | 1.21(0.97-1.52) | 9.31E-02 | 6.04E-01 |
| rs2834579  | 21 CLIC6        | 0.18 Add | 1.21(0.97-1.52) | 9.31E-02 | 6.04E-01 |
| rs7281040  | 21 CLIC6        | 0.18 Add | 1.21(0.97-1.52) | 9.80E-02 | 6.22E-01 |
| rs2154443  | 21 CLIC6        | 0.18 Dom | 1.25(0.97-1.62) | 8.91E-02 | 6.38E-01 |
| rs2070368  | 21 CLIC6        | 0.40 Dom | 1.24(0.96-1.59) | 9.56E-02 | 6.56E-01 |
| rs3819041  | 21 CLIC6        | 0.40 Dom | 1.24(0.96-1.59) | 9.56E-02 | 6.56E-01 |
| rs2834576  | 21 CLIC6        | 0.18 Add | 1.2(0.96-1.51)  | 1.15E-01 | 6.73E-01 |
| rs2186287  | 21 CLIC6        | 0.18 Dom | 1.23(0.95-1.59) | 1.12E-01 | 7.10E-01 |
| rs2834575  | 21 CLIC6        | 0.18 Dom | 1.23(0.95-1.59) | 1.24E-01 | 7.22E-01 |



|            |          |          |                 |          |          |
|------------|----------|----------|-----------------|----------|----------|
| rs2409531  | 21 CLIC6 | 0.18 Dom | 1.23(0.95-1.59) | 1.24E-01 | 7.22E-01 |
| rs2834587  | 21 CLIC6 | 0.18 Dom | 1.21(0.94-1.57) | 1.40E-01 | 7.26E-01 |
| rs1107470  | 21 CLIC6 | 0.14 Dom | 1.15(0.88-1.52) | 3.09E-01 | 7.30E-01 |
| rs2236610  | 21 CLIC6 | 0.18 Dom | 1.22(0.94-1.58) | 1.28E-01 | 7.31E-01 |
| rs2834578  | 21 CLIC6 | 0.37 Dom | 1.15(0.9-1.47)  | 2.73E-01 | 7.33E-01 |
| rs2834603  | 21 CLIC6 | 0.11 Dom | 1.26(0.93-1.7)  | 1.34E-01 | 7.34E-01 |
| rs2834601  | 21 CLIC6 | 0.11 Dom | 1.26(0.93-1.7)  | 1.34E-01 | 7.34E-01 |
| rs7275340  | 21 CLIC6 | 0.18 Add | 1.18(0.94-1.48) | 1.46E-01 | 7.47E-01 |
| rs2834585  | 21 CLIC6 | 0.18 Add | 1.18(0.94-1.48) | 1.46E-01 | 7.47E-01 |
| rs2834586  | 21 CLIC6 | 0.18 Add | 1.18(0.94-1.48) | 1.46E-01 | 7.47E-01 |
| rs733014   | 21 CLIC6 | 0.18 Add | 1.18(0.94-1.48) | 1.46E-01 | 7.47E-01 |
| rs1075704  | 21 CLIC6 | 0.18 Add | 1.18(0.94-1.48) | 1.46E-01 | 7.47E-01 |
| rs717578   | 21 CLIC6 | 0.18 Add | 1.18(0.94-1.48) | 1.46E-01 | 7.47E-01 |
| rs2834591  | 21 CLIC6 | 0.18 Dom | 1.2(0.93-1.56)  | 1.58E-01 | 7.65E-01 |
| rs1557271  | 21 CLIC6 | 0.18 Dom | 1.2(0.93-1.56)  | 1.58E-01 | 7.65E-01 |
| rs2186288  | 21 CLIC6 | 0.18 Dom | 1.2(0.93-1.56)  | 1.58E-01 | 7.65E-01 |
| rs2154444  | 21 CLIC6 | 0.19 Add | 0.9(0.73-1.12)  | 3.51E-01 | 7.71E-01 |
| rs2834604  | 21 CLIC6 | 0.26 Dom | 0.94(0.74-1.19) | 6.00E-01 | 7.89E-01 |
| rs9353525  | 6 CNR1   | 0.44 Dom | 0.75(0.58-0.97) | 2.73E-02 | 5.55E-01 |
| rs806376   | 6 CNR1   | 0.24 Dom | 0.76(0.6-0.97)  | 2.93E-02 | 5.70E-01 |
| rs9353524  | 6 CNR1   | 0.44 Dom | 0.75(0.58-0.97) | 3.02E-02 | 5.84E-01 |
| rs806375   | 6 CNR1   | 0.25 Dom | 0.77(0.61-0.99) | 3.86E-02 | 6.56E-01 |
| rs806377   | 6 CNR1   | 0.30 Dom | 0.78(0.61-0.99) | 4.45E-02 | 6.99E-01 |
| rs806381   | 6 CNR1   | 0.29 Dom | 0.8(0.63-1.02)  | 6.82E-02 | 8.29E-01 |
| rs6454672  | 6 CNR1   | 0.02 Add | 1.07(0.53-2.16) | 8.47E-01 | 8.48E-01 |
| rs7752758  | 6 CNR1   | 0.02 Add | 1.07(0.53-2.16) | 8.47E-01 | 8.48E-01 |
| rs806365   | 6 CNR1   | 0.38 Dom | 0.82(0.64-1.05) | 1.07E-01 | 9.29E-01 |
| rs12528858 | 6 CNR1   | 0.06 Dom | 0.96(0.66-1.38) | 8.08E-01 | 9.76E-01 |
| rs806372   | 6 CNR1   | 0.47 Dom | 0.82(0.63-1.08) | 1.60E-01 | 9.79E-01 |
| rs806370   | 6 CNR1   | 0.47 Dom | 0.82(0.63-1.08) | 1.60E-01 | 9.79E-01 |
| rs806368   | 6 CNR1   | 0.48 Dom | 0.83(0.63-1.08) | 1.63E-01 | 9.80E-01 |
| rs806371   | 6 CNR1   | 0.48 Dom | 0.83(0.63-1.09) | 1.79E-01 | 9.87E-01 |
| rs806378   | 6 CNR1   | 0.15 Dom | 0.84(0.64-1.1)  | 2.10E-01 | 9.89E-01 |
| rs806380   | 6 CNR1   | 0.16 Dom | 0.84(0.64-1.1)  | 2.09E-01 | 9.89E-01 |

|            |         |          |                 |          |          |
|------------|---------|----------|-----------------|----------|----------|
| rs6454673  | 6 CNR1  | 0.21 Dom | 0.85(0.66-1.09) | 1.90E-01 | 9.89E-01 |
| rs9444584  | 6 CNR1  | 0.14 Rec | 1.84(0.71-4.76) | 2.06E-01 | 9.93E-01 |
| rs2057276  | 6 CNR1  | 0.06 Add | 1.06(0.73-1.53) | 7.60E-01 | 9.93E-01 |
| rs10485171 | 6 CNR1  | 0.07 Add | 1.08(0.76-1.52) | 6.69E-01 | 9.94E-01 |
| rs806379   | 6 CNR1  | 0.18 Add | 0.88(0.7-1.1)   | 2.51E-01 | 9.95E-01 |
| rs6938321  | 6 CNR1  | 0.10 Dom | 0.9(0.66-1.23)  | 5.14E-01 | 9.96E-01 |
| rs1049353  | 6 CNR1  | 0.06 Add | 1.08(0.75-1.56) | 6.66E-01 | 9.96E-01 |
| rs4707436  | 6 CNR1  | 0.07 Add | 1.08(0.76-1.53) | 6.59E-01 | 9.96E-01 |
| rs806369   | 6 CNR1  | 0.41 Rec | 0.92(0.66-1.27) | 6.15E-01 | 9.97E-01 |
| rs806374   | 6 CNR1  | 0.47 Dom | 0.88(0.67-1.15) | 3.48E-01 | 9.97E-01 |
| rs7766029  | 6 CNR1  | 0.07 Add | 1.14(0.82-1.59) | 4.36E-01 | 9.97E-01 |
| rs2023239  | 6 CNR1  | 0.02 Add | 0.89(0.5-1.6)   | 6.98E-01 | 9.98E-01 |
| rs6928813  | 6 CNR1  | 0.02 Add | 0.89(0.5-1.6)   | 6.98E-01 | 9.98E-01 |
| rs6928499  | 6 CNR1  | 0.02 Add | 0.89(0.5-1.6)   | 6.98E-01 | 9.98E-01 |
| rs9450898  | 6 CNR1  | 0.02 Add | 0.89(0.5-1.6)   | 6.98E-01 | 9.98E-01 |
| rs806366   | 6 CNR1  | 0.41 Add | 0.92(0.77-1.1)  | 3.57E-01 | 9.98E-01 |
| rs12205430 | 6 CNR1  | 0.15 Add | 0.88(0.69-1.12) | 2.98E-01 | 9.98E-01 |
| rs4680     | 22 COMT | 0.26 Rec | 0.57(0.33-0.97) | 3.98E-02 | 7.79E-01 |
| rs8137828  | 22 COMT | 0.31 Rec | 0.66(0.43-1)    | 4.80E-02 | 8.46E-01 |
| rs4646316  | 22 COMT | 0.33 Dom | 1.25(0.98-1.6)  | 6.95E-02 | 9.37E-01 |
| rs5746846  | 22 COMT | 0.31 Rec | 0.69(0.46-1.05) | 8.00E-02 | 9.52E-01 |
| rs5746848  | 22 COMT | 0.31 Rec | 0.69(0.46-1.05) | 8.00E-02 | 9.52E-01 |
| rs165599   | 22 COMT | 0.49 Rec | 0.97(0.73-1.29) | 8.38E-01 | 9.73E-01 |
| rs6518592  | 22 COMT | 0.29 Add | 0.87(0.73-1.05) | 1.60E-01 | 9.83E-01 |
| rs1544325  | 22 COMT | 0.29 Add | 0.88(0.73-1.05) | 1.62E-01 | 9.84E-01 |
| rs4646312  | 22 COMT | 0.35 Dom | 1.21(0.95-1.55) | 1.20E-01 | 9.89E-01 |
| rs2239393  | 22 COMT | 0.35 Dom | 1.21(0.95-1.54) | 1.26E-01 | 9.91E-01 |
| rs12627876 | 22 COMT | 0.06 Add | 1.25(0.88-1.77) | 2.22E-01 | 9.92E-01 |
| rs5746847  | 22 COMT | 0.29 Add | 0.89(0.74-1.07) | 2.06E-01 | 9.94E-01 |
| rs5748483  | 22 COMT | 0.29 Add | 0.89(0.74-1.07) | 2.06E-01 | 9.94E-01 |
| rs5748489  | 22 COMT | 0.29 Add | 0.89(0.74-1.07) | 2.06E-01 | 9.94E-01 |
| rs9606186  | 22 COMT | 0.29 Add | 0.89(0.74-1.07) | 2.06E-01 | 9.94E-01 |
| rs5748485  | 22 COMT | 0.29 Add | 0.89(0.74-1.07) | 2.06E-01 | 9.94E-01 |
| rs165774   | 22 COMT | 0.13 Dom | 0.86(0.65-1.14) | 2.86E-01 | 9.96E-01 |

|            |         |          |                 |          |          |
|------------|---------|----------|-----------------|----------|----------|
| rs4633     | 22 COMT | 0.25 Rec | 0.7(0.41-1.19)  | 1.83E-01 | 9.98E-01 |
| rs1110479  | 22 COMT | 0.41 Dom | 0.99(0.77-1.28) | 9.66E-01 | 9.98E-01 |
| rs10483103 | 22 COMT | 0.31 Add | 1.11(0.93-1.32) | 2.63E-01 | 9.98E-01 |
| rs2871047  | 22 COMT | 0.31 Add | 1.11(0.93-1.32) | 2.63E-01 | 9.98E-01 |
| rs174674   | 22 COMT | 0.41 Rec | 1.23(0.89-1.69) | 2.07E-01 | 9.99E-01 |
| rs174673   | 22 COMT | 0.32 Add | 1.09(0.92-1.31) | 3.20E-01 | 1.00E+00 |
| rs5993891  | 22 COMT | 0.03 Add | 0.81(0.5-1.31)  | 3.87E-01 | 1.00E+00 |
| rs2239395  | 22 COMT | 0.03 Dom | 0.82(0.49-1.35) | 4.33E-01 | 1.00E+00 |
| rs758373   | 22 COMT | 0.03 Dom | 0.82(0.49-1.35) | 4.33E-01 | 1.00E+00 |
| rs2240713  | 22 COMT | 0.03 Dom | 0.82(0.49-1.35) | 4.33E-01 | 1.00E+00 |
| rs2239394  | 22 COMT | 0.03 Dom | 0.82(0.49-1.35) | 4.33E-01 | 1.00E+00 |
| rs933271   | 22 COMT | 0.42 Add | 1.08(0.91-1.28) | 3.80E-01 | 1.00E+00 |
| rs165728   | 22 COMT | 0.41 Rec | 0.99(0.72-1.37) | 9.56E-01 | 1.00E+00 |
| rs174699   | 22 COMT | 0.41 Rec | 0.99(0.72-1.37) | 9.56E-01 | 1.00E+00 |
| rs174696   | 22 COMT | 0.48 Rec | 1.17(0.88-1.56) | 2.84E-01 | 1.00E+00 |
| rs165656   | 22 COMT | 0.25 Rec | 0.75(0.45-1.27) | 2.83E-01 | 1.00E+00 |
| rs174675   | 22 COMT | 0.42 Rec | 1.19(0.87-1.63) | 2.76E-01 | 1.00E+00 |
| rs165815   | 22 COMT | 0.50 Add | 1(0.84-1.18)    | 9.56E-01 | 1.00E+00 |
| rs5992500  | 22 COMT | 0.08 Add | 1.11(0.8-1.53)  | 5.40E-01 | 1.00E+00 |
| rs887199   | 22 COMT | 0.50 Dom | 1.01(0.76-1.33) | 9.47E-01 | 1.00E+00 |
| rs165824   | 22 COMT | 0.48 Add | 1.06(0.89-1.27) | 4.97E-01 | 1.00E+00 |
| rs174697   | 22 COMT | 0.39 Rec | 0.92(0.65-1.3)  | 6.38E-01 | 1.00E+00 |
| rs2518823  | 22 COMT | 0.49 Dom | 1.06(0.81-1.4)  | 6.56E-01 | 1.00E+00 |
| rs11705619 | 22 COMT | 0.02 Add | 0.98(0.52-1.82) | 9.38E-01 | 1.00E+00 |
| rs740603   | 22 COMT | 0.42 Rec | 1.06(0.78-1.44) | 7.00E-01 | 1.00E+00 |
| rs5993882  | 22 COMT | 0.09 Add | 0.96(0.71-1.29) | 7.91E-01 | 1.00E+00 |
| rs9606189  | 22 COMT | 0.30 Add | 1.03(0.86-1.24) | 7.47E-01 | 1.00E+00 |
| rs737866   | 22 COMT | 0.29 Dom | 1.08(0.85-1.38) | 5.11E-01 | 1.00E+00 |
| rs7290221  | 22 COMT | 0.42 Dom | 1.09(0.85-1.41) | 4.89E-01 | 1.00E+00 |
| rs9332315  | 22 COMT | 0.03 Add | 0.95(0.59-1.53) | 8.30E-01 | 1.00E+00 |
| rs9605030  | 22 COMT | 0.30 Add | 1.03(0.86-1.24) | 7.57E-01 | 1.00E+00 |
| rs737865   | 22 COMT | 0.29 Dom | 1.08(0.85-1.38) | 5.09E-01 | 1.00E+00 |
| rs6518591  | 22 COMT | 0.08 Add | 0.94(0.68-1.3)  | 7.19E-01 | 1.00E+00 |
| rs9605031  | 22 COMT | 0.30 Dom | 1.08(0.85-1.37) | 5.35E-01 | 1.00E+00 |

|            |           |          |                 |          |          |
|------------|-----------|----------|-----------------|----------|----------|
| rs5748484  | 22 COMT   | 0.30 Dom | 1.08(0.85-1.37) | 5.35E-01 | 1.00E+00 |
| rs8140265  | 22 COMT   | 0.30 Dom | 1.08(0.85-1.37) | 5.35E-01 | 1.00E+00 |
| rs4485648  | 22 COMT   | 0.08 Dom | 1.05(0.75-1.47) | 7.70E-01 | 1.00E+00 |
| rs5993883  | 22 COMT   | 0.38 Rec | 0.99(0.71-1.37) | 9.35E-01 | 1.00E+00 |
| rs1110477  | 22 COMT   | 0.41 Dom | 0.96(0.74-1.23) | 7.35E-01 | 1.00E+00 |
| rs2020917  | 22 COMT   | 0.30 Dom | 1.07(0.84-1.37) | 5.57E-01 | 1.00E+00 |
| rs8185002  | 22 COMT   | 0.29 Dom | 1.07(0.84-1.36) | 5.71E-01 | 1.00E+00 |
| rs4646310  | 22 COMT   | 0.02 Add | 0.96(0.52-1.79) | 9.03E-01 | 1.00E+00 |
| rs6267     | 22 COMT   | 0.03 Add | 1.03(0.61-1.73) | 9.19E-01 | 1.00E+00 |
| rs2518824  | 22 COMT   | 0.50 Dom | 0.98(0.74-1.3)  | 9.14E-01 | 1.00E+00 |
| rs887200   | 22 COMT   | 0.50 Dom | 0.98(0.74-1.3)  | 9.14E-01 | 1.00E+00 |
| rs1110478  | 22 COMT   | 0.50 Dom | 0.98(0.74-1.3)  | 9.14E-01 | 1.00E+00 |
| rs7569963  | 2 CREB1   | 0.14 Dom | 1.17(0.89-1.53) | 2.68E-01 | 8.88E-01 |
| rs3770704  | 2 CREB1   | 0.24 Dom | 0.88(0.69-1.13) | 3.18E-01 | 8.92E-01 |
| rs16839883 | 2 CREB1   | 0.24 Dom | 0.89(0.69-1.13) | 3.38E-01 | 9.07E-01 |
| rs11904814 | 2 CREB1   | 0.39 Add | 1(0.84-1.19)    | 9.95E-01 | 9.95E-01 |
| rs2254137  | 2 CREB1   | 0.39 Add | 1(0.84-1.19)    | 9.95E-01 | 9.95E-01 |
| rs2551645  | 2 CREB1   | 0.39 Add | 1(0.84-1.19)    | 9.95E-01 | 9.95E-01 |
| rs6740584  | 2 CREB1   | 0.39 Add | 1(0.84-1.19)    | 9.95E-01 | 9.95E-01 |
| rs10932201 | 2 CREB1   | 0.39 Rec | 1.01(0.72-1.42) | 9.41E-01 | 1.00E+00 |
| rs2253206  | 2 CREB1   | 0.39 Dom | 0.99(0.77-1.27) | 9.24E-01 | 1.00E+00 |
| rs7369949  | 2 CREB1   | 0.39 Add | 1(0.84-1.19)    | 9.87E-01 | 1.00E+00 |
| rs2551640  | 2 CREB1   | 0.39 Rec | 1.04(0.74-1.45) | 8.37E-01 | 1.00E+00 |
| rs12599202 | 16 CREBBP | 0.04 Add | 1.87(1.18-2.96) | 7.45E-03 | 1.29E-01 |
| rs2072381  | 16 CREBBP | 0.09 Dom | 1.49(1.09-2.04) | 1.31E-02 | 2.07E-01 |
| rs2283480  | 16 CREBBP | 0.10 Dom | 1.3(0.96-1.76)  | 9.07E-02 | 9.32E-01 |
| rs130021   | 16 CREBBP | 0.41 Add | 1.14(0.96-1.36) | 1.28E-01 | 9.44E-01 |
| rs13332076 | 16 CREBBP | 0.01 Add | 0.97(0.45-2.13) | 9.45E-01 | 9.45E-01 |
| rs8044812  | 16 CREBBP | 0.01 Add | 0.97(0.45-2.13) | 9.45E-01 | 9.45E-01 |
| rs3789033  | 16 CREBBP | 0.10 Dom | 1.28(0.95-1.73) | 1.02E-01 | 9.49E-01 |
| rs129968   | 16 CREBBP | 0.44 Dom | 1.22(0.94-1.59) | 1.39E-01 | 9.78E-01 |
| rs130030   | 16 CREBBP | 0.01 Add | 0.93(0.43-2.03) | 8.62E-01 | 9.91E-01 |
| rs130018   | 16 CREBBP | 0.01 Add | 0.93(0.43-2.03) | 8.62E-01 | 9.91E-01 |
| rs1296721  | 16 CREBBP | 0.01 Add | 0.93(0.43-2.03) | 8.62E-01 | 9.91E-01 |

|            |           |          |                 |          |          |
|------------|-----------|----------|-----------------|----------|----------|
| rs130045   | 16 CREBBP | 0.01 Add | 0.93(0.43-2.03) | 8.62E-01 | 9.91E-01 |
| rs8055118  | 16 CREBBP | 0.01 Add | 0.93(0.43-2.03) | 8.62E-01 | 9.91E-01 |
| rs3025702  | 16 CREBBP | 0.01 Add | 0.93(0.43-2.03) | 8.62E-01 | 9.91E-01 |
| rs9392     | 16 CREBBP | 0.43 Add | 1.01(0.85-1.19) | 9.05E-01 | 9.91E-01 |
| rs130005   | 16 CREBBP | 0.32 Add | 1.13(0.95-1.36) | 1.76E-01 | 9.91E-01 |
| rs8052927  | 16 CREBBP | 0.22 Dom | 0.85(0.66-1.09) | 1.99E-01 | 9.96E-01 |
| rs11076786 | 16 CREBBP | 0.19 Add | 1.12(0.9-1.39)  | 3.01E-01 | 9.96E-01 |
| rs3025684  | 16 CREBBP | 0.22 Dom | 0.85(0.66-1.09) | 2.06E-01 | 9.96E-01 |
| rs130051   | 16 CREBBP | 0.19 Rec | 1.07(0.58-2)    | 8.26E-01 | 9.97E-01 |
| rs12051375 | 16 CREBBP | 0.21 Dom | 0.86(0.67-1.1)  | 2.22E-01 | 9.97E-01 |
| rs2239316  | 16 CREBBP | 0.33 Rec | 1.13(0.77-1.68) | 5.27E-01 | 9.98E-01 |
| rs2526687  | 16 CREBBP | 0.02 Add | 0.77(0.4-1.47)  | 4.22E-01 | 9.98E-01 |
| rs2540044  | 16 CREBBP | 0.02 Add | 0.77(0.4-1.47)  | 4.22E-01 | 9.98E-01 |
| rs13380693 | 16 CREBBP | 0.22 Dom | 0.88(0.68-1.12) | 2.92E-01 | 9.98E-01 |
| rs11644593 | 16 CREBBP | 0.31 Add | 1.11(0.92-1.33) | 2.83E-01 | 9.98E-01 |
| rs130007   | 16 CREBBP | 0.01 Add | 0.72(0.29-1.78) | 4.79E-01 | 9.99E-01 |
| rs130006   | 16 CREBBP | 0.01 Add | 0.72(0.29-1.78) | 4.79E-01 | 9.99E-01 |
| rs130028   | 16 CREBBP | 0.02 Add | 0.79(0.4-1.56)  | 4.97E-01 | 9.99E-01 |
| rs130002   | 16 CREBBP | 0.21 Dom | 0.87(0.68-1.12) | 2.76E-01 | 9.99E-01 |
| rs130052   | 16 CREBBP | 0.32 Add | 1.09(0.91-1.31) | 3.41E-01 | 9.99E-01 |
| rs2239318  | 16 CREBBP | 0.31 Dom | 1.14(0.89-1.45) | 2.91E-01 | 9.99E-01 |
| rs2239317  | 16 CREBBP | 0.31 Add | 1.1(0.92-1.32)  | 2.95E-01 | 9.99E-01 |
| rs11864123 | 16 CREBBP | 0.22 Dom | 0.86(0.67-1.11) | 2.50E-01 | 9.99E-01 |
| rs130025   | 16 CREBBP | 0.02 Add | 0.9(0.45-1.79)  | 7.63E-01 | 9.99E-01 |
| rs2191416  | 16 CREBBP | 0.39 Dom | 0.87(0.68-1.11) | 2.73E-01 | 9.99E-01 |
| rs129982   | 16 CREBBP | 0.19 Dom | 0.88(0.68-1.13) | 3.12E-01 | 9.99E-01 |
| rs129993   | 16 CREBBP | 0.19 Dom | 0.88(0.68-1.13) | 3.12E-01 | 9.99E-01 |
| rs3025697  | 16 CREBBP | 0.02 Add | 0.81(0.41-1.6)  | 5.40E-01 | 9.99E-01 |
| rs13334803 | 16 CREBBP | 0.02 Add | 0.82(0.42-1.58) | 5.47E-01 | 9.99E-01 |
| rs8046065  | 16 CREBBP | 0.08 Add | 0.88(0.64-1.2)  | 4.11E-01 | 9.99E-01 |
| rs2526691  | 16 CREBBP | 0.22 Dom | 0.89(0.69-1.14) | 3.60E-01 | 1.00E+00 |
| rs129984   | 16 CREBBP | 0.19 Dom | 0.92(0.71-1.18) | 5.08E-01 | 1.00E+00 |
| rs9931922  | 16 CREBBP | 0.14 Add | 0.89(0.7-1.15)  | 3.76E-01 | 1.00E+00 |
| rs4567717  | 16 CREBBP | 0.02 Add | 0.85(0.45-1.6)  | 6.12E-01 | 1.00E+00 |

|            |           |          |                  |          |          |
|------------|-----------|----------|------------------|----------|----------|
| rs8047652  | 16 CREBBP | 0.21 Dom | 0.9(0.7-1.16)    | 4.14E-01 | 1.00E+00 |
| rs129985   | 16 CREBBP | 0.01 Add | 0.79(0.33-1.87)  | 5.96E-01 | 1.00E+00 |
| rs886528   | 16 CREBBP | 0.43 Dom | 0.93(0.72-1.2)   | 5.78E-01 | 1.00E+00 |
| rs7202140  | 16 CREBBP | 0.23 Dom | 0.89(0.7-1.14)   | 3.73E-01 | 1.00E+00 |
| rs9302779  | 16 CREBBP | 0.21 Add | 0.95(0.77-1.18)  | 6.44E-01 | 1.00E+00 |
| rs9921319  | 16 CREBBP | 0.02 Add | 0.86(0.44-1.68)  | 6.57E-01 | 1.00E+00 |
| rs6500556  | 16 CREBBP | 0.02 Add | 0.86(0.44-1.68)  | 6.57E-01 | 1.00E+00 |
| rs6500553  | 16 CREBBP | 0.02 Add | 0.86(0.44-1.68)  | 6.57E-01 | 1.00E+00 |
| rs130037   | 16 CREBBP | 0.02 Add | 0.86(0.44-1.68)  | 6.57E-01 | 1.00E+00 |
| rs130046   | 16 CREBBP | 0.02 Add | 0.86(0.44-1.68)  | 6.57E-01 | 1.00E+00 |
| rs9929384  | 16 CREBBP | 0.02 Add | 0.86(0.44-1.68)  | 6.57E-01 | 1.00E+00 |
| rs9936092  | 16 CREBBP | 0.02 Add | 0.86(0.44-1.68)  | 6.57E-01 | 1.00E+00 |
| rs2540038  | 16 CREBBP | 0.02 Add | 0.86(0.44-1.68)  | 6.57E-01 | 1.00E+00 |
| rs2110534  | 16 CREBBP | 0.02 Add | 0.86(0.44-1.68)  | 6.57E-01 | 1.00E+00 |
| rs9940938  | 16 CREBBP | 0.02 Add | 0.86(0.44-1.68)  | 6.57E-01 | 1.00E+00 |
| rs129963   | 16 CREBBP | 0.13 Rec | 0.67(0.22-2.02)  | 4.79E-01 | 1.00E+00 |
| rs4076452  | 17 CRHR1  | 0.11 Rec | 5.32(1.66-17.06) | 4.49E-03 | 1.10E-02 |
| rs12953076 | 17 CRHR1  | 0.10 Add | 1.56(1.17-2.06)  | 2.05E-03 | 1.91E-02 |
| rs4074461  | 17 CRHR1  | 0.11 Rec | 4.88(1.68-14.14) | 3.51E-03 | 2.13E-02 |
| rs12944712 | 17 CRHR1  | 0.09 Add | 1.48(1.1-1.98)   | 9.09E-03 | 5.83E-02 |
| rs110402   | 17 CRHR1  | 0.09 Add | 1.44(1.08-1.94)  | 1.45E-02 | 8.63E-02 |
| rs7209436  | 17 CRHR1  | 0.09 Add | 1.44(1.07-1.93)  | 1.52E-02 | 8.92E-02 |
| rs242924   | 17 CRHR1  | 0.07 Add | 1.39(1.01-1.92)  | 4.49E-02 | 2.05E-01 |
| rs173365   | 17 CRHR1  | 0.10 Dom | 1.26(0.93-1.71)  | 1.35E-01 | 3.85E-01 |
| rs81189    | 17 CRHR1  | 0.13 Add | 1.19(0.92-1.53)  | 1.77E-01 | 6.95E-01 |
| rs171440   | 17 CRHR1  | 0.13 Add | 1.19(0.92-1.53)  | 1.77E-01 | 6.95E-01 |
| rs242942   | 17 CRHR1  | 0.02 Add | 0.9(0.47-1.74)   | 7.57E-01 | 8.03E-01 |
| rs3785877  | 17 CRHR1  | 0.02 Add | 0.9(0.47-1.74)   | 7.57E-01 | 8.03E-01 |
| rs242944   | 17 CRHR1  | 0.20 Add | 0.93(0.75-1.14)  | 4.73E-01 | 8.93E-01 |
| rs17763658 | 17 CRHR1  | 0.16 Add | 0.9(0.71-1.14)   | 3.95E-01 | 9.08E-01 |
| rs17689966 | 17 CRHR1  | 0.20 Add | 0.92(0.74-1.14)  | 4.31E-01 | 9.10E-01 |
| rs10993885 | 9 DBH     | 0.46 Dom | 1.52(1.15-1.99)  | 2.83E-03 | 1.68E-01 |
| rs2519148  | 9 DBH     | 0.43 Dom | 1.4(1.08-1.82)   | 1.20E-02 | 4.93E-01 |
| rs129931   | 9 DBH     | 0.22 Dom | 1.37(1.07-1.75)  | 1.28E-02 | 5.10E-01 |

|            |       |          |                 |          |          |
|------------|-------|----------|-----------------|----------|----------|
| rs10993950 | 9 DBH | 0.05 Add | 1.44(0.98-2.1)  | 6.21E-02 | 8.09E-01 |
| rs129886   | 9 DBH | 0.40 Dom | 0.77(0.6-0.98)  | 3.62E-02 | 8.29E-01 |
| rs129885   | 9 DBH | 0.39 Dom | 0.77(0.6-0.99)  | 4.28E-02 | 8.71E-01 |
| rs1076153  | 9 DBH | 0.36 Dom | 1.27(1-1.63)    | 5.23E-02 | 9.11E-01 |
| rs1611115  | 9 DBH | 0.18 Dom | 1.29(1-1.67)    | 5.36E-02 | 9.17E-01 |
| rs1076152  | 9 DBH | 0.27 Rec | 0.62(0.37-1.04) | 6.78E-02 | 9.44E-01 |
| rs2519143  | 9 DBH | 0.18 Dom | 1.27(0.98-1.64) | 6.67E-02 | 9.46E-01 |
| rs6479643  | 9 DBH | 0.26 Add | 1.19(0.98-1.45) | 7.32E-02 | 9.54E-01 |
| rs1611114  | 9 DBH | 0.35 Dom | 1.25(0.98-1.59) | 7.35E-02 | 9.54E-01 |
| rs3025373  | 9 DBH | 0.08 Add | 0.8(0.57-1.11)  | 1.84E-01 | 9.76E-01 |
| rs1108581  | 9 DBH | 0.17 Dom | 0.98(0.75-1.27) | 8.52E-01 | 9.78E-01 |
| rs129882   | 9 DBH | 0.38 Add | 0.88(0.73-1.04) | 1.39E-01 | 9.87E-01 |
| rs2007153  | 9 DBH | 0.34 Dom | 1.22(0.96-1.55) | 1.11E-01 | 9.88E-01 |
| rs129884   | 9 DBH | 0.38 Dom | 0.82(0.64-1.05) | 1.18E-01 | 9.89E-01 |
| rs1611118  | 9 DBH | 0.03 Add | 0.73(0.43-1.23) | 2.40E-01 | 9.90E-01 |
| rs2283124  | 9 DBH | 0.14 Dom | 1.18(0.9-1.55)  | 2.38E-01 | 9.91E-01 |
| rs2283123  | 9 DBH | 0.14 Dom | 1.18(0.9-1.55)  | 2.38E-01 | 9.91E-01 |
| rs7851898  | 9 DBH | 0.47 Rec | 1.22(0.92-1.63) | 1.73E-01 | 9.98E-01 |
| rs3025406  | 9 DBH | 0.15 Rec | 1.11(0.5-2.43)  | 8.00E-01 | 9.98E-01 |
| rs129930   | 9 DBH | 0.15 Rec | 1.48(0.67-3.27) | 3.31E-01 | 9.99E-01 |
| rs13306304 | 9 DBH | 0.15 Rec | 1.48(0.67-3.27) | 3.31E-01 | 9.99E-01 |
| rs77905    | 9 DBH | 0.09 Add | 1.17(0.87-1.56) | 3.03E-01 | 9.99E-01 |
| rs1548367  | 9 DBH | 0.03 Dom | 0.77(0.46-1.31) | 3.37E-01 | 9.99E-01 |
| rs2073833  | 9 DBH | 0.47 Rec | 0.88(0.66-1.18) | 3.99E-01 | 9.99E-01 |
| rs3739885  | 9 DBH | 0.02 Add | 0.79(0.45-1.41) | 4.35E-01 | 1.00E+00 |
| rs3025382  | 9 DBH | 0.02 Add | 0.8(0.45-1.41)  | 4.38E-01 | 1.00E+00 |
| rs3025425  | 9 DBH | 0.08 Add | 1.13(0.83-1.52) | 4.43E-01 | 1.00E+00 |
| rs3025399  | 9 DBH | 0.10 Add | 1.02(0.76-1.36) | 8.99E-01 | 1.00E+00 |
| rs10993948 | 9 DBH | 0.10 Dom | 1.11(0.82-1.52) | 5.00E-01 | 1.00E+00 |
| rs732833   | 9 DBH | 0.47 Rec | 0.91(0.68-1.22) | 5.17E-01 | 1.00E+00 |
| rs12337651 | 9 DBH | 0.03 Add | 1.18(0.72-1.94) | 5.10E-01 | 1.00E+00 |
| rs3025422  | 9 DBH | 0.10 Dom | 1.08(0.8-1.47)  | 6.10E-01 | 1.00E+00 |
| rs1611120  | 9 DBH | 0.14 Rec | 1.4(0.59-3.34)  | 4.46E-01 | 1.00E+00 |
| rs2097629  | 9 DBH | 0.46 Rec | 0.92(0.69-1.24) | 6.05E-01 | 1.00E+00 |

|            |       |          |                 |          |          |
|------------|-------|----------|-----------------|----------|----------|
| rs1548364  | 9 DBH | 0.16 Rec | 0.9(0.42-1.92)  | 7.85E-01 | 1.00E+00 |
| rs129888   | 9 DBH | 0.38 Rec | 1.15(0.81-1.64) | 4.25E-01 | 1.00E+00 |
| rs129928   | 9 DBH | 0.38 Rec | 1.15(0.81-1.64) | 4.25E-01 | 1.00E+00 |
| rs2073835  | 9 DBH | 0.38 Rec | 1.15(0.81-1.63) | 4.44E-01 | 1.00E+00 |
| rs2519154  | 9 DBH | 0.10 Rec | 0.61(0.2-1.84)  | 3.78E-01 | 1.00E+00 |
| rs1541333  | 9 DBH | 0.11 Rec | 0.81(0.3-2.19)  | 6.75E-01 | 1.00E+00 |
| rs1611119  | 9 DBH | 0.02 Add | 0.88(0.46-1.66) | 6.82E-01 | 1.00E+00 |
| rs10993949 | 9 DBH | 0.10 Dom | 1.09(0.8-1.48)  | 5.79E-01 | 1.00E+00 |
| rs5320     | 9 DBH | 0.14 Rec | 1.28(0.53-3.11) | 5.82E-01 | 1.00E+00 |
| rs2519147  | 9 DBH | 0.03 Add | 1.14(0.7-1.84)  | 6.02E-01 | 1.00E+00 |
| rs1076150  | 9 DBH | 0.10 Add | 0.87(0.65-1.17) | 3.63E-01 | 1.00E+00 |
| rs1611125  | 9 DBH | 0.16 Rec | 1.13(0.49-2.6)  | 7.69E-01 | 1.00E+00 |
| rs3025388  | 9 DBH | 0.16 Dom | 0.96(0.74-1.24) | 7.41E-01 | 1.00E+00 |
| rs2873804  | 9 DBH | 0.16 Dom | 0.99(0.76-1.29) | 9.44E-01 | 1.00E+00 |
| rs129915   | 9 DBH | 0.44 Rec | 1.02(0.74-1.41) | 8.93E-01 | 1.00E+00 |
| rs1541332  | 9 DBH | 0.04 Dom | 0.92(0.58-1.48) | 7.42E-01 | 1.00E+00 |
| rs1611123  | 9 DBH | 0.14 Dom | 1.03(0.78-1.36) | 8.26E-01 | 1.00E+00 |
| rs1108580  | 9 DBH | 0.16 Add | 0.94(0.75-1.19) | 6.28E-01 | 1.00E+00 |
| rs1611122  | 9 DBH | 0.16 Rec | 1.24(0.53-2.89) | 6.22E-01 | 1.00E+00 |
| rs2097628  | 9 DBH | 0.07 Dom | 0.96(0.68-1.36) | 8.27E-01 | 1.00E+00 |
| rs3025369  | 9 DBH | 0.19 Dom | 0.96(0.75-1.24) | 7.75E-01 | 1.00E+00 |
| rs6593011  | 7 DDC | 0.01 Add | 0.21(0.07-0.61) | 4.43E-03 | 3.46E-02 |
| rs6263     | 7 DDC | 0.06 Dom | 0.66(0.45-0.97) | 3.68E-02 | 6.41E-01 |
| rs11575516 | 7 DDC | 0.06 Dom | 0.68(0.46-1)    | 4.82E-02 | 7.31E-01 |
| rs1376523  | 7 DDC | 0.10 Dom | 0.72(0.53-0.99) | 4.20E-02 | 8.56E-01 |
| rs11575489 | 7 DDC | 0.06 Dom | 0.75(0.51-1.11) | 1.51E-01 | 9.78E-01 |
| rs6951648  | 7 DDC | 0.02 Add | 0.68(0.38-1.23) | 2.03E-01 | 9.87E-01 |
| rs2329364  | 7 DDC | 0.09 Add | 0.82(0.61-1.1)  | 1.82E-01 | 9.89E-01 |
| rs11772714 | 7 DDC | 0.42 Add | 1(0.84-1.19)    | 9.92E-01 | 9.92E-01 |
| rs3735274  | 7 DDC | 0.20 Rec | 0.59(0.29-1.18) | 1.33E-01 | 9.95E-01 |
| rs1982406  | 7 DDC | 0.20 Rec | 0.59(0.29-1.18) | 1.33E-01 | 9.95E-01 |
| rs12538830 | 7 DDC | 0.20 Rec | 0.59(0.29-1.18) | 1.33E-01 | 9.95E-01 |
| rs10244632 | 7 DDC | 0.20 Rec | 0.59(0.29-1.18) | 1.33E-01 | 9.95E-01 |
| rs10249982 | 7 DDC | 0.20 Rec | 0.59(0.29-1.18) | 1.33E-01 | 9.95E-01 |



|            |       |          |                 |          |          |
|------------|-------|----------|-----------------|----------|----------|
| rs12535064 | 7 DDC | 0.20 Rec | 0.59(0.29-1.18) | 1.33E-01 | 9.95E-01 |
| rs9918702  | 7 DDC | 0.20 Rec | 0.59(0.29-1.18) | 1.33E-01 | 9.95E-01 |
| rs11575388 | 7 DDC | 0.03 Add | 0.72(0.41-1.26) | 2.48E-01 | 9.95E-01 |
| rs11575383 | 7 DDC | 0.03 Add | 0.72(0.41-1.26) | 2.48E-01 | 9.95E-01 |
| rs11238138 | 7 DDC | 0.40 Dom | 0.82(0.64-1.06) | 1.31E-01 | 9.96E-01 |
| rs2876827  | 7 DDC | 0.40 Dom | 0.82(0.64-1.06) | 1.31E-01 | 9.96E-01 |
| rs4992502  | 7 DDC | 0.40 Dom | 0.82(0.64-1.06) | 1.31E-01 | 9.96E-01 |
| rs4579483  | 7 DDC | 0.40 Dom | 0.82(0.64-1.06) | 1.31E-01 | 9.96E-01 |
| rs2329365  | 7 DDC | 0.40 Dom | 0.82(0.64-1.06) | 1.31E-01 | 9.96E-01 |
| rs4580999  | 7 DDC | 0.40 Dom | 0.82(0.64-1.06) | 1.31E-01 | 9.96E-01 |
| rs12718528 | 7 DDC | 0.40 Dom | 0.82(0.64-1.06) | 1.31E-01 | 9.96E-01 |
| rs1349492  | 7 DDC | 0.40 Dom | 0.82(0.64-1.06) | 1.31E-01 | 9.96E-01 |
| rs7786398  | 7 DDC | 0.47 Dom | 0.81(0.62-1.07) | 1.35E-01 | 9.97E-01 |
| rs4947594  | 7 DDC | 0.07 Dom | 0.81(0.56-1.17) | 2.67E-01 | 9.97E-01 |
| rs10250513 | 7 DDC | 0.45 Dom | 0.82(0.63-1.07) | 1.46E-01 | 9.98E-01 |
| rs1451373  | 7 DDC | 0.45 Dom | 0.82(0.63-1.07) | 1.46E-01 | 9.98E-01 |
| rs1451374  | 7 DDC | 0.45 Dom | 0.82(0.63-1.07) | 1.46E-01 | 9.98E-01 |
| rs921450   | 7 DDC | 0.45 Dom | 0.82(0.63-1.07) | 1.46E-01 | 9.98E-01 |
| rs4452748  | 7 DDC | 0.45 Dom | 0.82(0.63-1.07) | 1.46E-01 | 9.98E-01 |
| rs1451375  | 7 DDC | 0.45 Dom | 0.82(0.63-1.07) | 1.46E-01 | 9.98E-01 |
| rs2329340  | 7 DDC | 0.45 Dom | 0.82(0.63-1.07) | 1.46E-01 | 9.98E-01 |
| rs4585697  | 7 DDC | 0.19 Rec | 0.6(0.3-1.21)   | 1.53E-01 | 9.98E-01 |
| rs921451   | 7 DDC | 0.45 Dom | 0.82(0.63-1.07) | 1.46E-01 | 9.98E-01 |
| rs7456339  | 7 DDC | 0.20 Rec | 0.6(0.3-1.21)   | 1.53E-01 | 9.98E-01 |
| rs2329342  | 7 DDC | 0.45 Dom | 0.82(0.63-1.07) | 1.46E-01 | 9.98E-01 |
| rs6949897  | 7 DDC | 0.45 Dom | 0.82(0.63-1.07) | 1.46E-01 | 9.98E-01 |
| rs3887825  | 7 DDC | 0.40 Dom | 0.83(0.65-1.07) | 1.50E-01 | 9.98E-01 |
| rs12718527 | 7 DDC | 0.40 Dom | 0.83(0.65-1.07) | 1.50E-01 | 9.98E-01 |
| rs4433100  | 7 DDC | 0.40 Dom | 0.83(0.65-1.07) | 1.50E-01 | 9.98E-01 |
| rs12718529 | 7 DDC | 0.40 Dom | 0.83(0.65-1.07) | 1.50E-01 | 9.98E-01 |
| rs745043   | 7 DDC | 0.42 Dom | 1(0.77-1.29)    | 9.77E-01 | 9.99E-01 |
| rs745042   | 7 DDC | 0.42 Dom | 1(0.77-1.29)    | 9.77E-01 | 9.99E-01 |
| rs4948196  | 7 DDC | 0.40 Add | 0.89(0.75-1.06) | 2.06E-01 | 9.99E-01 |
| rs10899734 | 7 DDC | 0.40 Add | 0.89(0.75-1.06) | 2.06E-01 | 9.99E-01 |

|            |       |          |                 |          |          |
|------------|-------|----------|-----------------|----------|----------|
| rs13311361 | 7 DDC | 0.40 Add | 0.89(0.75-1.06) | 2.06E-01 | 9.99E-01 |
| rs4947577  | 7 DDC | 0.40 Add | 0.89(0.75-1.06) | 2.06E-01 | 9.99E-01 |
| rs10899735 | 7 DDC | 0.40 Add | 0.89(0.75-1.06) | 2.06E-01 | 9.99E-01 |
| rs11575457 | 7 DDC | 0.40 Add | 0.89(0.75-1.06) | 2.06E-01 | 9.99E-01 |
| rs2122822  | 7 DDC | 0.40 Add | 0.89(0.75-1.06) | 2.06E-01 | 9.99E-01 |
| rs1451372  | 7 DDC | 0.40 Add | 0.89(0.75-1.06) | 2.06E-01 | 9.99E-01 |
| rs11980368 | 7 DDC | 0.40 Add | 0.89(0.75-1.06) | 2.06E-01 | 9.99E-01 |
| rs12718541 | 7 DDC | 0.40 Add | 0.89(0.75-1.06) | 2.06E-01 | 9.99E-01 |
| rs17133877 | 7 DDC | 0.10 Add | 0.85(0.64-1.14) | 2.73E-01 | 9.99E-01 |
| rs10228056 | 7 DDC | 0.10 Add | 0.85(0.64-1.14) | 2.76E-01 | 9.99E-01 |
| rs1966839  | 7 DDC | 0.45 Dom | 0.84(0.64-1.09) | 1.84E-01 | 1.00E+00 |
| rs3807558  | 7 DDC | 0.48 Add | 1.11(0.93-1.31) | 2.48E-01 | 1.00E+00 |
| rs2876829  | 7 DDC | 0.48 Add | 1.11(0.93-1.31) | 2.48E-01 | 1.00E+00 |
| rs11575450 | 7 DDC | 0.03 Add | 0.77(0.44-1.33) | 3.49E-01 | 1.00E+00 |
| rs17133842 | 7 DDC | 0.03 Add | 0.77(0.44-1.33) | 3.49E-01 | 1.00E+00 |
| rs11575288 | 7 DDC | 0.13 Add | 0.85(0.66-1.09) | 1.93E-01 | 1.00E+00 |
| rs1451368  | 7 DDC | 0.19 Rec | 0.64(0.32-1.28) | 2.06E-01 | 1.00E+00 |
| rs6592963  | 7 DDC | 0.19 Rec | 0.64(0.32-1.28) | 2.06E-01 | 1.00E+00 |
| rs1451371  | 7 DDC | 0.40 Dom | 0.85(0.66-1.09) | 2.03E-01 | 1.00E+00 |
| rs10899736 | 7 DDC | 0.40 Dom | 0.85(0.66-1.09) | 2.03E-01 | 1.00E+00 |
| rs731689   | 7 DDC | 0.07 Add | 0.98(0.71-1.36) | 9.02E-01 | 1.00E+00 |
| rs17152014 | 7 DDC | 0.03 Add | 0.78(0.45-1.36) | 3.83E-01 | 1.00E+00 |
| rs17634958 | 7 DDC | 0.09 Add | 1.14(0.85-1.54) | 3.80E-01 | 1.00E+00 |
| rs896307   | 7 DDC | 0.48 Add | 1.1(0.93-1.3)   | 2.76E-01 | 1.00E+00 |
| rs2329367  | 7 DDC | 0.09 Add | 1.14(0.85-1.54) | 3.80E-01 | 1.00E+00 |
| rs4948201  | 7 DDC | 0.07 Dom | 0.86(0.6-1.21)  | 3.84E-01 | 1.00E+00 |
| rs17733244 | 7 DDC | 0.48 Rec | 1.19(0.89-1.58) | 2.35E-01 | 1.00E+00 |
| rs17634717 | 7 DDC | 0.09 Add | 1.14(0.84-1.54) | 4.05E-01 | 1.00E+00 |
| rs11575548 | 7 DDC | 0.09 Add | 1.14(0.84-1.54) | 4.05E-01 | 1.00E+00 |
| rs11575506 | 7 DDC | 0.08 Dom | 1.15(0.82-1.61) | 4.12E-01 | 1.00E+00 |
| rs4947582  | 7 DDC | 0.40 Dom | 0.86(0.67-1.1)  | 2.34E-01 | 1.00E+00 |
| rs4329234  | 7 DDC | 0.34 Dom | 0.9(0.71-1.15)  | 4.20E-01 | 1.00E+00 |
| rs6592952  | 7 DDC | 0.34 Add | 0.92(0.76-1.1)  | 3.35E-01 | 1.00E+00 |
| rs2329368  | 7 DDC | 0.06 Dom | 1.02(0.7-1.5)   | 9.09E-01 | 1.00E+00 |

|            |       |          |                 |          |          |
|------------|-------|----------|-----------------|----------|----------|
| rs11575453 | 7 DDC | 0.06 Dom | 1.02(0.7-1.5)   | 9.09E-01 | 1.00E+00 |
| rs7790758  | 7 DDC | 0.48 Add | 1.09(0.92-1.29) | 3.20E-01 | 1.00E+00 |
| rs1107743  | 7 DDC | 0.09 Add | 1.12(0.84-1.51) | 4.36E-01 | 1.00E+00 |
| rs2122817  | 7 DDC | 0.09 Add | 1.12(0.84-1.51) | 4.36E-01 | 1.00E+00 |
| rs17635123 | 7 DDC | 0.09 Dom | 1.14(0.83-1.56) | 4.13E-01 | 1.00E+00 |
| rs2100280  | 7 DDC | 0.19 Add | 0.9(0.73-1.13)  | 3.74E-01 | 1.00E+00 |
| rs4602840  | 7 DDC | 0.09 Add | 1.12(0.83-1.51) | 4.49E-01 | 1.00E+00 |
| rs3807552  | 7 DDC | 0.42 Rec | 1.21(0.87-1.67) | 2.52E-01 | 1.00E+00 |
| rs3779078  | 7 DDC | 0.44 Add | 1.09(0.91-1.29) | 3.45E-01 | 1.00E+00 |
| rs17133853 | 7 DDC | 0.02 Add | 0.8(0.43-1.46)  | 4.62E-01 | 1.00E+00 |
| rs11575387 | 7 DDC | 0.02 Add | 0.8(0.43-1.46)  | 4.62E-01 | 1.00E+00 |
| rs7791875  | 7 DDC | 0.02 Add | 0.8(0.43-1.46)  | 4.62E-01 | 1.00E+00 |
| rs11575575 | 7 DDC | 0.03 Add | 1.22(0.72-2.06) | 4.54E-01 | 1.00E+00 |
| rs6950777  | 7 DDC | 0.44 Add | 1.08(0.91-1.29) | 3.56E-01 | 1.00E+00 |
| rs2876830  | 7 DDC | 0.09 Dom | 1.13(0.83-1.54) | 4.29E-01 | 1.00E+00 |
| rs3735273  | 7 DDC | 0.44 Add | 1.08(0.91-1.29) | 3.56E-01 | 1.00E+00 |
| rs3807553  | 7 DDC | 0.09 Dom | 1.13(0.83-1.54) | 4.29E-01 | 1.00E+00 |
| rs9942686  | 7 DDC | 0.44 Add | 1.08(0.91-1.29) | 3.56E-01 | 1.00E+00 |
| rs1349491  | 7 DDC | 0.09 Dom | 1.13(0.83-1.54) | 4.29E-01 | 1.00E+00 |
| rs11575286 | 7 DDC | 0.09 Dom | 1.13(0.83-1.54) | 4.29E-01 | 1.00E+00 |
| rs3807556  | 7 DDC | 0.44 Add | 1.08(0.91-1.29) | 3.62E-01 | 1.00E+00 |
| rs11575320 | 7 DDC | 0.44 Add | 1.08(0.91-1.29) | 3.62E-01 | 1.00E+00 |
| rs3807555  | 7 DDC | 0.44 Add | 1.08(0.91-1.29) | 3.62E-01 | 1.00E+00 |
| rs12535024 | 7 DDC | 0.07 Add | 0.87(0.62-1.22) | 4.30E-01 | 1.00E+00 |
| rs11575313 | 7 DDC | 0.10 Dom | 1.13(0.83-1.53) | 4.44E-01 | 1.00E+00 |
| rs11575321 | 7 DDC | 0.10 Dom | 1.13(0.83-1.53) | 4.44E-01 | 1.00E+00 |
| rs11575322 | 7 DDC | 0.10 Dom | 1.13(0.83-1.53) | 4.44E-01 | 1.00E+00 |
| rs10271341 | 7 DDC | 0.44 Add | 1.08(0.91-1.28) | 3.82E-01 | 1.00E+00 |
| rs11575338 | 7 DDC | 0.10 Dom | 1.13(0.83-1.53) | 4.54E-01 | 1.00E+00 |
| rs11768267 | 7 DDC | 0.41 Rec | 0.9(0.65-1.24)  | 5.06E-01 | 1.00E+00 |
| rs730092   | 7 DDC | 0.41 Rec | 0.9(0.65-1.24)  | 5.06E-01 | 1.00E+00 |
| rs3779075  | 7 DDC | 0.07 Add | 0.88(0.63-1.23) | 4.47E-01 | 1.00E+00 |
| rs3779076  | 7 DDC | 0.07 Add | 0.88(0.63-1.23) | 4.47E-01 | 1.00E+00 |
| rs10276473 | 7 DDC | 0.43 Rec | 1.18(0.87-1.61) | 2.90E-01 | 1.00E+00 |

|            |       |          |                 |          |          |
|------------|-------|----------|-----------------|----------|----------|
| rs11575553 | 7 DDC | 0.09 Dom | 1.12(0.81-1.55) | 5.03E-01 | 1.00E+00 |
| rs2329371  | 7 DDC | 0.43 Rec | 1.18(0.87-1.61) | 2.90E-01 | 1.00E+00 |
| rs2242041  | 7 DDC | 0.09 Dom | 1.12(0.81-1.55) | 5.03E-01 | 1.00E+00 |
| rs4947511  | 7 DDC | 0.07 Add | 1.03(0.74-1.43) | 8.66E-01 | 1.00E+00 |
| rs4947510  | 7 DDC | 0.45 Rec | 0.91(0.67-1.22) | 5.11E-01 | 1.00E+00 |
| rs6969081  | 7 DDC | 0.42 Dom | 0.87(0.68-1.13) | 3.04E-01 | 1.00E+00 |
| rs6962356  | 7 DDC | 0.42 Dom | 0.87(0.68-1.13) | 3.04E-01 | 1.00E+00 |
| rs11771860 | 7 DDC | 0.03 Add | 0.84(0.51-1.37) | 4.75E-01 | 1.00E+00 |
| rs4947631  | 7 DDC | 0.03 Add | 0.84(0.51-1.37) | 4.75E-01 | 1.00E+00 |
| rs4245549  | 7 DDC | 0.03 Add | 0.84(0.51-1.37) | 4.75E-01 | 1.00E+00 |
| rs11763051 | 7 DDC | 0.03 Add | 0.84(0.51-1.37) | 4.75E-01 | 1.00E+00 |
| rs2167363  | 7 DDC | 0.03 Add | 0.84(0.51-1.37) | 4.75E-01 | 1.00E+00 |
| rs3779084  | 7 DDC | 0.11 Dom | 1.06(0.79-1.42) | 6.85E-01 | 1.00E+00 |
| rs3823674  | 7 DDC | 0.33 Rec | 0.88(0.6-1.3)   | 5.28E-01 | 1.00E+00 |
| rs12718574 | 7 DDC | 0.33 Rec | 0.88(0.6-1.3)   | 5.28E-01 | 1.00E+00 |
| rs11238133 | 7 DDC | 0.49 Dom | 0.87(0.66-1.14) | 3.12E-01 | 1.00E+00 |
| rs10249420 | 7 DDC | 0.46 Add | 1.06(0.9-1.27)  | 4.78E-01 | 1.00E+00 |
| rs7790230  | 7 DDC | 0.45 Rec | 0.91(0.68-1.23) | 5.44E-01 | 1.00E+00 |
| rs1470747  | 7 DDC | 0.46 Add | 1.06(0.9-1.26)  | 4.82E-01 | 1.00E+00 |
| rs10265930 | 7 DDC | 0.46 Add | 1.06(0.9-1.26)  | 4.82E-01 | 1.00E+00 |
| rs1817074  | 7 DDC | 0.18 Add | 0.93(0.74-1.16) | 4.96E-01 | 1.00E+00 |
| rs17152020 | 7 DDC | 0.15 Dom | 1.14(0.87-1.49) | 3.44E-01 | 1.00E+00 |
| rs11761683 | 7 DDC | 0.49 Dom | 0.88(0.66-1.16) | 3.50E-01 | 1.00E+00 |
| rs7803788  | 7 DDC | 0.45 Add | 1.06(0.89-1.26) | 4.86E-01 | 1.00E+00 |
| rs7803440  | 7 DDC | 0.45 Add | 1.06(0.89-1.26) | 4.86E-01 | 1.00E+00 |
| rs3779074  | 7 DDC | 0.44 Rec | 1.16(0.85-1.58) | 3.41E-01 | 1.00E+00 |
| rs2044859  | 7 DDC | 0.44 Rec | 1.16(0.85-1.58) | 3.41E-01 | 1.00E+00 |
| rs17665588 | 7 DDC | 0.06 Add | 0.9(0.64-1.28)  | 5.74E-01 | 1.00E+00 |
| rs11575305 | 7 DDC | 0.01 Add | 0.81(0.36-1.82) | 6.08E-01 | 1.00E+00 |
| rs4948197  | 7 DDC | 0.06 Add | 0.9(0.64-1.28)  | 5.74E-01 | 1.00E+00 |
| rs4947576  | 7 DDC | 0.06 Add | 0.9(0.64-1.28)  | 5.74E-01 | 1.00E+00 |
| rs17665670 | 7 DDC | 0.06 Add | 0.9(0.64-1.28)  | 5.74E-01 | 1.00E+00 |
| rs3807566  | 7 DDC | 0.33 Dom | 0.93(0.73-1.19) | 5.72E-01 | 1.00E+00 |
| rs7785224  | 7 DDC | 0.49 Add | 0.94(0.79-1.12) | 4.85E-01 | 1.00E+00 |

|            |       |          |                 |          |          |
|------------|-------|----------|-----------------|----------|----------|
| rs1007702  | 7 DDC | 0.06 Add | 0.89(0.63-1.26) | 5.11E-01 | 1.00E+00 |
| rs1007749  | 7 DDC | 0.06 Add | 0.89(0.63-1.26) | 5.11E-01 | 1.00E+00 |
| rs1817073  | 7 DDC | 0.06 Add | 0.89(0.63-1.26) | 5.11E-01 | 1.00E+00 |
| rs6944090  | 7 DDC | 0.10 Add | 1.07(0.8-1.43)  | 6.44E-01 | 1.00E+00 |
| rs17133881 | 7 DDC | 0.03 Add | 0.85(0.51-1.4)  | 5.24E-01 | 1.00E+00 |
| rs4490786  | 7 DDC | 0.14 Dom | 1.14(0.87-1.5)  | 3.36E-01 | 1.00E+00 |
| rs17133878 | 7 DDC | 0.42 Dom | 0.89(0.69-1.15) | 3.64E-01 | 1.00E+00 |
| rs7808025  | 7 DDC | 0.19 Rec | 0.73(0.36-1.46) | 3.74E-01 | 1.00E+00 |
| rs2060762  | 7 DDC | 0.46 Dom | 1.12(0.85-1.46) | 4.22E-01 | 1.00E+00 |
| rs7803247  | 7 DDC | 0.41 Rec | 0.93(0.68-1.28) | 6.54E-01 | 1.00E+00 |
| rs896309   | 7 DDC | 0.45 Rec | 1.15(0.85-1.54) | 3.68E-01 | 1.00E+00 |
| rs2198144  | 7 DDC | 0.18 Dom | 0.95(0.73-1.22) | 6.70E-01 | 1.00E+00 |
| rs7809758  | 7 DDC | 0.18 Dom | 0.95(0.73-1.22) | 6.70E-01 | 1.00E+00 |
| rs4947584  | 7 DDC | 0.18 Dom | 0.95(0.73-1.22) | 6.70E-01 | 1.00E+00 |
| rs2167364  | 7 DDC | 0.12 Rec | 0.81(0.3-2.18)  | 6.81E-01 | 1.00E+00 |
| rs10499695 | 7 DDC | 0.43 Dom | 0.92(0.71-1.19) | 5.13E-01 | 1.00E+00 |
| rs3735275  | 7 DDC | 0.47 Dom | 1.11(0.85-1.45) | 4.49E-01 | 1.00E+00 |
| rs11765748 | 7 DDC | 0.37 Rec | 0.89(0.63-1.27) | 5.20E-01 | 1.00E+00 |
| rs11575334 | 7 DDC | 0.37 Rec | 0.9(0.63-1.27)  | 5.41E-01 | 1.00E+00 |
| rs998850   | 7 DDC | 0.37 Rec | 0.9(0.63-1.27)  | 5.41E-01 | 1.00E+00 |
| rs1470750  | 7 DDC | 0.23 Rec | 1.14(0.68-1.91) | 6.24E-01 | 1.00E+00 |
| rs6592961  | 7 DDC | 0.18 Dom | 0.97(0.75-1.26) | 8.45E-01 | 1.00E+00 |
| rs11575413 | 7 DDC | 0.07 Add | 0.93(0.66-1.31) | 6.77E-01 | 1.00E+00 |
| rs11974297 | 7 DDC | 0.43 Dom | 0.91(0.7-1.18)  | 4.67E-01 | 1.00E+00 |
| rs4947535  | 7 DDC | 0.49 Dom | 0.97(0.73-1.28) | 8.16E-01 | 1.00E+00 |
| rs12718572 | 7 DDC | 0.23 Rec | 1.21(0.71-2.05) | 4.76E-01 | 1.00E+00 |
| rs1037351  | 7 DDC | 0.12 Rec | 0.73(0.28-1.93) | 5.28E-01 | 1.00E+00 |
| rs7777600  | 7 DDC | 0.10 Dom | 1.06(0.78-1.44) | 7.22E-01 | 1.00E+00 |
| rs11238131 | 7 DDC | 0.48 Rec | 0.96(0.72-1.27) | 7.56E-01 | 1.00E+00 |
| rs10499694 | 7 DDC | 0.37 Rec | 0.93(0.65-1.32) | 6.78E-01 | 1.00E+00 |
| rs732215   | 7 DDC | 0.43 Dom | 0.91(0.7-1.18)  | 4.74E-01 | 1.00E+00 |
| rs7792474  | 7 DDC | 0.07 Dom | 1.07(0.75-1.53) | 6.92E-01 | 1.00E+00 |
| rs17665398 | 7 DDC | 0.07 Dom | 1.07(0.75-1.53) | 6.92E-01 | 1.00E+00 |
| rs880028   | 7 DDC | 0.12 Rec | 0.77(0.29-2.07) | 6.07E-01 | 1.00E+00 |

|            |        |          |                 |          |          |
|------------|--------|----------|-----------------|----------|----------|
| rs4947644  | 7 DDC  | 0.43 Dom | 0.93(0.72-1.2)  | 5.65E-01 | 1.00E+00 |
| rs2168631  | 5 DRD1 | 0.37 Dom | 1.37(1.07-1.75) | 1.32E-02 | 4.80E-01 |
| rs10463051 | 5 DRD1 | 0.25 Dom | 1.35(1.06-1.72) | 1.59E-02 | 5.35E-01 |
| rs17065021 | 5 DRD1 | 0.25 Dom | 1.35(1.06-1.72) | 1.59E-02 | 5.36E-01 |
| rs7724863  | 5 DRD1 | 0.27 Dom | 1.29(1.01-1.65) | 3.80E-02 | 8.08E-01 |
| rs265974   | 5 DRD1 | 0.46 Dom | 1.3(1-1.7)      | 5.39E-02 | 8.92E-01 |
| rs4867798  | 5 DRD1 | 0.44 Dom | 1.29(0.99-1.68) | 5.47E-02 | 8.93E-01 |
| rs10476156 | 5 DRD1 | 0.18 Rec | 0.52(0.26-1.05) | 6.67E-02 | 9.04E-01 |
| rs6882300  | 5 DRD1 | 0.19 Dom | 1.27(0.98-1.64) | 6.56E-02 | 9.28E-01 |
| rs10063286 | 5 DRD1 | 0.19 Dom | 1.27(0.98-1.64) | 6.56E-02 | 9.28E-01 |
| rs10039221 | 5 DRD1 | 0.18 Dom | 1.23(0.95-1.59) | 1.15E-01 | 9.44E-01 |
| rs28465440 | 5 DRD1 | 0.16 Rec | 1.02(0.49-2.15) | 9.53E-01 | 9.53E-01 |
| rs10042826 | 5 DRD1 | 0.19 Dom | 1.25(0.97-1.61) | 8.33E-02 | 9.64E-01 |
| rs11747728 | 5 DRD1 | 0.18 Dom | 1.25(0.97-1.61) | 8.40E-02 | 9.65E-01 |
| rs11749035 | 5 DRD1 | 0.17 Dom | 1.25(0.97-1.63) | 8.99E-02 | 9.71E-01 |
| rs6878159  | 5 DRD1 | 0.19 Dom | 1.24(0.96-1.6)  | 9.32E-02 | 9.74E-01 |
| rs267400   | 5 DRD1 | 0.46 Rec | 0.78(0.58-1.05) | 1.04E-01 | 9.78E-01 |
| rs11738801 | 5 DRD1 | 0.17 Dom | 1.24(0.96-1.61) | 1.03E-01 | 9.78E-01 |
| rs267405   | 5 DRD1 | 0.46 Rec | 0.78(0.58-1.05) | 1.02E-01 | 9.79E-01 |
| rs267407   | 5 DRD1 | 0.46 Rec | 0.78(0.58-1.05) | 1.02E-01 | 9.79E-01 |
| rs267406   | 5 DRD1 | 0.46 Rec | 0.78(0.58-1.05) | 1.02E-01 | 9.80E-01 |
| rs11742274 | 5 DRD1 | 0.18 Rec | 0.58(0.29-1.17) | 1.27E-01 | 9.80E-01 |
| rs11746172 | 5 DRD1 | 0.18 Rec | 0.58(0.29-1.17) | 1.27E-01 | 9.80E-01 |
| rs4867796  | 5 DRD1 | 0.18 Dom | 1.23(0.95-1.59) | 1.13E-01 | 9.85E-01 |
| rs11747886 | 5 DRD1 | 0.18 Dom | 1.23(0.95-1.59) | 1.16E-01 | 9.86E-01 |
| rs4867797  | 5 DRD1 | 0.18 Dom | 1.23(0.95-1.59) | 1.16E-01 | 9.86E-01 |
| rs835540   | 5 DRD1 | 0.48 Rec | 1.06(0.8-1.41)  | 6.65E-01 | 9.86E-01 |
| rs265969   | 5 DRD1 | 0.17 Dom | 0.81(0.63-1.06) | 1.21E-01 | 9.88E-01 |
| rs267418   | 5 DRD1 | 0.47 Rec | 0.79(0.59-1.07) | 1.27E-01 | 9.90E-01 |
| rs265973   | 5 DRD1 | 0.45 Dom | 1.08(0.83-1.41) | 5.47E-01 | 9.91E-01 |
| rs11749676 | 5 DRD1 | 0.14 Dom | 0.81(0.61-1.07) | 1.37E-01 | 9.93E-01 |
| rs686      | 5 DRD1 | 0.14 Dom | 0.81(0.61-1.07) | 1.38E-01 | 9.94E-01 |
| rs4532     | 5 DRD1 | 0.14 Dom | 0.81(0.61-1.07) | 1.38E-01 | 9.94E-01 |
| rs265981   | 5 DRD1 | 0.14 Dom | 0.82(0.62-1.08) | 1.53E-01 | 9.95E-01 |

|            |           |          |                 |          |          |
|------------|-----------|----------|-----------------|----------|----------|
| rs703748   | 5 DRD1    | 0.42 Rec | 0.79(0.57-1.09) | 1.54E-01 | 9.95E-01 |
| rs12518222 | 5 DRD1    | 0.23 Dom | 1.19(0.93-1.52) | 1.62E-01 | 9.95E-01 |
| rs265971   | 5 DRD1    | 0.17 Dom | 0.83(0.63-1.07) | 1.50E-01 | 9.95E-01 |
| rs2457090  | 5 DRD1    | 0.15 Dom | 0.82(0.62-1.08) | 1.56E-01 | 9.95E-01 |
| rs2471005  | 5 DRD1    | 0.15 Dom | 0.82(0.62-1.08) | 1.56E-01 | 9.95E-01 |
| rs11746641 | 5 DRD1    | 0.18 Dom | 1.2(0.93-1.55)  | 1.67E-01 | 9.95E-01 |
| rs267417   | 5 DRD1    | 0.14 Dom | 0.82(0.62-1.08) | 1.49E-01 | 9.96E-01 |
| rs10042051 | 5 DRD1    | 0.20 Dom | 1.2(0.94-1.55)  | 1.49E-01 | 9.96E-01 |
| rs267416   | 5 DRD1    | 0.48 Rec | 0.81(0.61-1.09) | 1.62E-01 | 9.96E-01 |
| rs265968   | 5 DRD1    | 0.34 Dom | 0.85(0.66-1.08) | 1.78E-01 | 9.96E-01 |
| rs5326     | 5 DRD1    | 0.23 Dom | 1.19(0.93-1.52) | 1.68E-01 | 9.96E-01 |
| rs1799914  | 5 DRD1    | 0.08 Dom | 0.92(0.66-1.29) | 6.41E-01 | 9.96E-01 |
| rs251937   | 5 DRD1    | 0.45 Rec | 0.81(0.6-1.1)   | 1.87E-01 | 9.97E-01 |
| rs265977   | 5 DRD1    | 0.20 Add | 0.97(0.78-1.2)  | 7.73E-01 | 9.97E-01 |
| rs1587176  | 5 DRD1    | 0.12 Rec | 1.6(0.52-4.85)  | 4.10E-01 | 9.98E-01 |
| rs265978   | 5 DRD1    | 0.14 Dom | 0.84(0.64-1.11) | 2.14E-01 | 9.98E-01 |
| rs265972   | 5 DRD1    | 0.35 Rec | 0.79(0.54-1.15) | 2.15E-01 | 9.98E-01 |
| rs6881740  | 5 DRD1    | 0.38 Add | 0.93(0.78-1.11) | 4.02E-01 | 9.98E-01 |
| rs11739696 | 5 DRD1    | 0.38 Dom | 0.91(0.71-1.16) | 4.54E-01 | 9.98E-01 |
| rs265975   | 5 DRD1    | 0.35 Dom | 1.15(0.9-1.47)  | 2.69E-01 | 9.99E-01 |
| rs2453737  | 5 DRD1    | 0.39 Dom | 0.92(0.72-1.18) | 5.09E-01 | 9.99E-01 |
| rs265967   | 5 DRD1    | 0.37 Rec | 0.87(0.61-1.23) | 4.32E-01 | 9.99E-01 |
| rs265976   | 5 DRD1    | 0.17 Rec | 0.73(0.34-1.56) | 4.13E-01 | 9.99E-01 |
| rs835616   | 5 DRD1    | 0.19 Rec | 1.49(0.75-2.96) | 2.53E-01 | 9.99E-01 |
| rs1310277  | 5 DRD1    | 0.10 Add | 1.08(0.81-1.42) | 6.05E-01 | 9.99E-01 |
| rs863126   | 5 DRD1    | 0.45 Rec | 1.17(0.87-1.59) | 2.96E-01 | 9.99E-01 |
| rs2644635  | 5 DRD1    | 0.45 Rec | 0.87(0.64-1.17) | 3.60E-01 | 9.99E-01 |
| rs11954565 | 5 DRD1    | 0.45 Rec | 0.87(0.64-1.17) | 3.60E-01 | 9.99E-01 |
| rs2275723  | 10 DRD1IP | 0.04 Add | 0.66(0.41-1.08) | 1.02E-01 | 2.49E-01 |
| rs4838721  | 10 DRD1IP | 0.06 Dom | 0.76(0.52-1.11) | 1.57E-01 | 3.56E-01 |
| rs11101694 | 10 DRD1IP | 0.06 Dom | 0.79(0.54-1.15) | 2.21E-01 | 4.68E-01 |
| rs2105341  | 10 DRD1IP | 0.06 Dom | 0.8(0.55-1.17)  | 2.48E-01 | 5.10E-01 |
| rs7085530  | 10 DRD1IP | 0.06 Dom | 0.83(0.57-1.23) | 3.56E-01 | 6.58E-01 |
| rs12250582 | 10 DRD1IP | 0.06 Dom | 0.83(0.57-1.23) | 3.56E-01 | 6.58E-01 |

|            |           |          |                 |          |          |
|------------|-----------|----------|-----------------|----------|----------|
| rs12244716 | 10 DRD1IP | 0.06 Dom | 0.83(0.57-1.23) | 3.56E-01 | 6.58E-01 |
| rs2298122  | 10 DRD1IP | 0.07 Add | 0.88(0.63-1.21) | 4.27E-01 | 6.80E-01 |
| rs10776672 | 10 DRD1IP | 0.02 Add | 0.9(0.52-1.59)  | 7.28E-01 | 7.27E-01 |
| rs2864417  | 10 DRD1IP | 0.02 Add | 0.9(0.52-1.59)  | 7.28E-01 | 7.27E-01 |
| rs1486009  | 3 DRD3    | 0.01 Add | 0.34(0.12-0.95) | 3.98E-02 | 3.42E-01 |
| rs2134655  | 3 DRD3    | 0.27 Rec | 1.59(0.96-2.64) | 7.23E-02 | 8.73E-01 |
| rs7633291  | 3 DRD3    | 0.27 Dom | 1.24(0.97-1.58) | 8.36E-02 | 8.90E-01 |
| rs324022   | 3 DRD3    | 0.30 Dom | 1.21(0.95-1.54) | 1.17E-01 | 9.54E-01 |
| rs10934256 | 3 DRD3    | 0.28 Dom | 1.2(0.94-1.53)  | 1.35E-01 | 9.71E-01 |
| rs1385884  | 3 DRD3    | 0.49 Add | 1(0.84-1.19)    | 9.72E-01 | 9.72E-01 |
| rs9880168  | 3 DRD3    | 0.12 Add | 1.17(0.91-1.52) | 2.27E-01 | 9.75E-01 |
| rs2399496  | 3 DRD3    | 0.45 Dom | 0.82(0.64-1.07) | 1.49E-01 | 9.78E-01 |
| rs324036   | 3 DRD3    | 0.18 Rec | 1.58(0.83-2.99) | 1.63E-01 | 9.83E-01 |
| rs9817063  | 3 DRD3    | 0.44 Dom | 0.83(0.64-1.08) | 1.60E-01 | 9.84E-01 |
| rs3773678  | 3 DRD3    | 0.18 Add | 1.13(0.91-1.41) | 2.83E-01 | 9.88E-01 |
| rs6787134  | 3 DRD3    | 0.06 Dom | 1.22(0.84-1.76) | 2.99E-01 | 9.89E-01 |
| rs9825563  | 3 DRD3    | 0.29 Dom | 1.17(0.92-1.49) | 2.02E-01 | 9.91E-01 |
| rs6808291  | 3 DRD3    | 0.03 Add | 0.79(0.47-1.32) | 3.61E-01 | 9.94E-01 |
| rs10934253 | 3 DRD3    | 0.03 Add | 0.79(0.47-1.32) | 3.61E-01 | 9.94E-01 |
| rs9682405  | 3 DRD3    | 0.03 Add | 0.79(0.47-1.32) | 3.61E-01 | 9.94E-01 |
| rs7625282  | 3 DRD3    | 0.28 Dom | 1.16(0.91-1.48) | 2.26E-01 | 9.94E-01 |
| rs2630351  | 3 DRD3    | 0.11 Add | 1.18(0.9-1.55)  | 2.37E-01 | 9.95E-01 |
| rs324032   | 3 DRD3    | 0.11 Add | 1.18(0.9-1.55)  | 2.37E-01 | 9.95E-01 |
| rs2630350  | 3 DRD3    | 0.11 Add | 1.18(0.9-1.55)  | 2.37E-01 | 9.95E-01 |
| rs9824856  | 3 DRD3    | 0.02 Add | 0.98(0.5-1.9)   | 9.43E-01 | 9.97E-01 |
| rs9859762  | 3 DRD3    | 0.02 Add | 0.98(0.5-1.9)   | 9.43E-01 | 9.97E-01 |
| rs7638876  | 3 DRD3    | 0.33 Dom | 1.06(0.83-1.36) | 6.20E-01 | 9.97E-01 |
| rs226082   | 3 DRD3    | 0.28 Dom | 1.15(0.91-1.47) | 2.46E-01 | 9.97E-01 |
| rs324029   | 3 DRD3    | 0.28 Dom | 1.15(0.91-1.47) | 2.46E-01 | 9.97E-01 |
| rs324030   | 3 DRD3    | 0.28 Dom | 1.15(0.91-1.47) | 2.46E-01 | 9.97E-01 |
| rs3732783  | 3 DRD3    | 0.02 Add | 0.78(0.43-1.43) | 4.24E-01 | 9.98E-01 |
| rs1486008  | 3 DRD3    | 0.02 Add | 0.78(0.43-1.43) | 4.24E-01 | 9.98E-01 |
| rs324035   | 3 DRD3    | 0.18 Rec | 1.43(0.77-2.64) | 2.53E-01 | 9.98E-01 |
| rs963468   | 3 DRD3    | 0.38 Dom | 0.93(0.72-1.19) | 5.53E-01 | 9.98E-01 |



|            |         |          |                 |          |          |
|------------|---------|----------|-----------------|----------|----------|
| rs11721264 | 3 DRD3  | 0.28 Dom | 1.14(0.9-1.45)  | 2.79E-01 | 9.98E-01 |
| rs1587756  | 3 DRD3  | 0.24 Dom | 1.13(0.89-1.44) | 3.26E-01 | 9.99E-01 |
| rs9869286  | 3 DRD3  | 0.03 Add | 0.82(0.49-1.37) | 4.56E-01 | 9.99E-01 |
| rs3773679  | 3 DRD3  | 0.34 Dom | 0.88(0.69-1.13) | 3.25E-01 | 9.99E-01 |
| rs167770   | 3 DRD3  | 0.28 Dom | 1.13(0.89-1.44) | 3.04E-01 | 9.99E-01 |
| rs2087017  | 3 DRD3  | 0.48 Rec | 1.04(0.78-1.39) | 7.77E-01 | 9.99E-01 |
| rs1486012  | 3 DRD3  | 0.48 Rec | 1.04(0.78-1.39) | 7.77E-01 | 9.99E-01 |
| rs1800828  | 3 DRD3  | 0.29 Add | 1.08(0.9-1.3)   | 3.93E-01 | 9.99E-01 |
| rs2630349  | 3 DRD3  | 0.13 Add | 1.13(0.88-1.46) | 3.42E-01 | 9.99E-01 |
| rs1587757  | 3 DRD3  | 0.22 Dom | 1.09(0.85-1.39) | 5.14E-01 | 9.99E-01 |
| rs3732790  | 3 DRD3  | 0.34 Dom | 0.91(0.71-1.16) | 4.55E-01 | 1.00E+00 |
| rs7638961  | 3 DRD3  | 0.31 Dom | 1.1(0.86-1.4)   | 4.38E-01 | 1.00E+00 |
| rs167771   | 3 DRD3  | 0.19 Rec | 1.23(0.67-2.26) | 5.05E-01 | 1.00E+00 |
| rs324026   | 3 DRD3  | 0.31 Dom | 1.11(0.87-1.41) | 4.05E-01 | 1.00E+00 |
| rs1354348  | 3 DRD3  | 0.02 Dom | 0.88(0.47-1.65) | 7.00E-01 | 1.00E+00 |
| rs16822393 | 3 DRD3  | 0.01 Dom | 1.22(0.57-2.59) | 6.07E-01 | 1.00E+00 |
| rs9880494  | 3 DRD3  | 0.30 Add | 1.07(0.89-1.29) | 4.87E-01 | 1.00E+00 |
| rs6280     | 3 DRD3  | 0.31 Dom | 1.1(0.86-1.4)   | 4.35E-01 | 1.00E+00 |
| rs12639080 | 3 DRD3  | 0.31 Dom | 1.1(0.86-1.4)   | 4.33E-01 | 1.00E+00 |
| rs7629232  | 3 DRD3  | 0.30 Dom | 1.1(0.87-1.4)   | 4.33E-01 | 1.00E+00 |
| rs11246226 | 11 DRD4 | 0.26 Rec | 1.84(1.15-2.94) | 1.11E-02 | 2.18E-01 |
| rs4331145  | 11 DRD4 | 0.25 Rec | 1.85(1.15-2.98) | 1.13E-02 | 2.19E-01 |
| rs936465   | 11 DRD4 | 0.24 Rec | 1.73(1.05-2.86) | 3.21E-02 | 4.70E-01 |
| rs11604855 | 11 DRD4 | 0.18 Rec | 0.44(0.19-1.01) | 5.27E-02 | 5.25E-01 |
| rs10902188 | 11 DRD4 | 0.18 Rec | 0.43(0.18-1.04) | 6.05E-02 | 5.56E-01 |
| rs3758653  | 11 DRD4 | 0.26 Dom | 0.96(0.75-1.22) | 7.14E-01 | 7.14E-01 |
| rs936461   | 11 DRD4 | 0.26 Rec | 0.67(0.39-1.16) | 1.50E-01 | 8.92E-01 |
| rs6598007  | 11 DRD4 | 0.29 Dom | 0.94(0.74-1.19) | 5.90E-01 | 9.11E-01 |
| rs4987059  | 11 DRD4 | 0.01 Add | 1.53(0.67-3.46) | 3.12E-01 | 9.29E-01 |
| rs2740373  | 11 DRD4 | 0.02 Add | 1.28(0.71-2.29) | 4.14E-01 | 9.43E-01 |
| rs7932167  | 11 DRD4 | 0.30 Rec | 0.84(0.56-1.26) | 4.01E-01 | 9.48E-01 |
| rs12280580 | 11 DRD4 | 0.02 Add | 1.17(0.66-2.08) | 5.84E-01 | 9.67E-01 |
| rs11246228 | 11 DRD4 | 0.43 Rec | 1.17(0.86-1.59) | 3.27E-01 | 9.75E-01 |
| rs4963126  | 11 DRD4 | 0.47 Add | 1.08(0.91-1.28) | 3.73E-01 | 9.76E-01 |

|            |         |          |                 |          |          |
|------------|---------|----------|-----------------|----------|----------|
| rs1519097  | 4 DRD5  | 0.39 Rec | 1.37(0.98-1.91) | 6.49E-02 | 6.54E-01 |
| rs10939515 | 4 DRD5  | 0.31 Add | 1.01(0.84-1.21) | 9.10E-01 | 9.10E-01 |
| rs13106539 | 4 DRD5  | 0.19 Dom | 1.19(0.92-1.53) | 1.77E-01 | 9.32E-01 |
| rs10939507 | 4 DRD5  | 0.21 Add | 1.1(0.89-1.36)  | 3.82E-01 | 9.37E-01 |
| rs10939504 | 4 DRD5  | 0.21 Add | 1.1(0.89-1.36)  | 3.82E-01 | 9.38E-01 |
| rs10939514 | 4 DRD5  | 0.21 Add | 1.1(0.89-1.36)  | 3.82E-01 | 9.38E-01 |
| rs2867383  | 4 DRD5  | 0.49 Add | 1.11(0.93-1.31) | 2.47E-01 | 9.39E-01 |
| rs10033951 | 4 DRD5  | 0.44 Dom | 1.11(0.86-1.43) | 4.35E-01 | 9.43E-01 |
| rs7655090  | 4 DRD5  | 0.46 Rec | 1.04(0.78-1.4)  | 7.84E-01 | 9.44E-01 |
| rs10003216 | 4 DRD5  | 0.33 Add | 0.91(0.76-1.1)  | 3.24E-01 | 9.57E-01 |
| rs11731100 | 4 DRD5  | 0.33 Add | 0.91(0.76-1.1)  | 3.24E-01 | 9.57E-01 |
| rs6282     | 4 DRD5  | 0.02 Add | 1.28(0.68-2.41) | 4.38E-01 | 9.59E-01 |
| rs1850739  | 4 DRD5  | 0.21 Add | 1.08(0.88-1.34) | 4.51E-01 | 9.60E-01 |
| rs938556   | 4 DRD5  | 0.21 Add | 1.09(0.88-1.34) | 4.30E-01 | 9.60E-01 |
| rs2280208  | 4 DRD5  | 0.21 Add | 1.09(0.88-1.34) | 4.30E-01 | 9.60E-01 |
| rs2280206  | 4 DRD5  | 0.19 Dom | 1.17(0.91-1.51) | 2.25E-01 | 9.65E-01 |
| rs2280207  | 4 DRD5  | 0.19 Dom | 1.17(0.91-1.51) | 2.25E-01 | 9.65E-01 |
| rs7685396  | 4 DRD5  | 0.19 Dom | 1.17(0.91-1.51) | 2.25E-01 | 9.65E-01 |
| rs6449000  | 4 DRD5  | 0.21 Dom | 1.08(0.84-1.39) | 5.31E-01 | 9.65E-01 |
| rs1850744  | 4 DRD5  | 0.21 Dom | 1.08(0.84-1.39) | 5.31E-01 | 9.65E-01 |
| rs10001006 | 4 DRD5  | 0.27 Dom | 1.11(0.87-1.41) | 4.06E-01 | 9.74E-01 |
| rs203277   | 1 EPB41 | 0.09 Add | 0.68(0.49-0.93) | 1.65E-02 | 2.29E-01 |
| rs126014   | 1 EPB41 | 0.09 Add | 0.7(0.51-0.95)  | 2.32E-02 | 2.58E-01 |
| rs1185779  | 1 EPB41 | 0.09 Add | 0.68(0.49-0.94) | 2.03E-02 | 2.64E-01 |
| rs2930836  | 1 EPB41 | 0.09 Add | 0.69(0.5-0.95)  | 2.38E-02 | 3.00E-01 |
| rs2762682  | 1 EPB41 | 0.09 Add | 0.69(0.5-0.95)  | 2.38E-02 | 3.00E-01 |
| rs3102739  | 1 EPB41 | 0.09 Add | 0.69(0.5-0.95)  | 2.38E-02 | 3.01E-01 |
| rs157220   | 1 EPB41 | 0.10 Add | 0.72(0.53-0.97) | 2.85E-02 | 3.01E-01 |
| rs150085   | 1 EPB41 | 0.09 Add | 0.69(0.5-0.95)  | 2.38E-02 | 3.01E-01 |
| rs204060   | 1 EPB41 | 0.09 Add | 0.69(0.5-0.95)  | 2.38E-02 | 3.01E-01 |
| rs457618   | 1 EPB41 | 0.09 Dom | 0.69(0.5-0.95)  | 2.45E-02 | 3.09E-01 |
| rs2788889  | 1 EPB41 | 0.08 Add | 0.7(0.5-0.96)   | 2.73E-02 | 3.28E-01 |
| rs2985340  | 1 EPB41 | 0.08 Add | 0.7(0.5-0.96)   | 2.73E-02 | 3.30E-01 |
| rs2993715  | 1 EPB41 | 0.08 Add | 0.7(0.5-0.96)   | 2.73E-02 | 3.30E-01 |

|            |         |          |                 |          |          |
|------------|---------|----------|-----------------|----------|----------|
| rs2985344  | 1 EPB41 | 0.08 Add | 0.7(0.51-0.96)  | 2.76E-02 | 3.31E-01 |
| rs2985331  | 1 EPB41 | 0.08 Add | 0.69(0.5-0.96)  | 2.80E-02 | 3.31E-01 |
| rs2985334  | 1 EPB41 | 0.09 Add | 0.71(0.52-0.98) | 3.65E-02 | 3.56E-01 |
| rs2985325  | 1 EPB41 | 0.09 Add | 0.72(0.52-0.98) | 3.88E-02 | 3.72E-01 |
| rs2930842  | 1 EPB41 | 0.09 Add | 0.72(0.52-0.98) | 3.88E-02 | 3.72E-01 |
| rs126013   | 1 EPB41 | 0.09 Dom | 0.72(0.52-0.99) | 4.28E-02 | 4.53E-01 |
| rs12021667 | 1 EPB41 | 0.08 Dom | 1.35(0.96-1.89) | 8.13E-02 | 6.50E-01 |
| rs2985319  | 1 EPB41 | 0.18 Rec | 2.02(1.01-4.01) | 4.60E-02 | 6.53E-01 |
| rs12021646 | 1 EPB41 | 0.08 Dom | 1.32(0.94-1.85) | 1.05E-01 | 7.38E-01 |
| rs10429865 | 1 EPB41 | 0.08 Dom | 1.32(0.94-1.85) | 1.05E-01 | 7.39E-01 |
| rs2762686  | 1 EPB41 | 0.41 Add | 1.16(0.98-1.38) | 9.09E-02 | 7.78E-01 |
| rs4654388  | 1 EPB41 | 0.06 Dom | 1.06(0.73-1.54) | 7.50E-01 | 8.11E-01 |
| rs157194   | 1 EPB41 | 0.41 Dom | 1.25(0.97-1.62) | 8.76E-02 | 8.44E-01 |
| rs150083   | 1 EPB41 | 0.41 Dom | 1.25(0.97-1.61) | 8.82E-02 | 8.46E-01 |
| rs157213   | 1 EPB41 | 0.41 Dom | 1.25(0.97-1.61) | 8.82E-02 | 8.46E-01 |
| rs6702335  | 1 EPB41 | 0.08 Dom | 1.28(0.91-1.79) | 1.50E-01 | 8.51E-01 |
| rs4360499  | 1 EPB41 | 0.41 Add | 1.15(0.97-1.37) | 1.17E-01 | 8.53E-01 |
| rs4654381  | 1 EPB41 | 0.24 Dom | 1.23(0.96-1.56) | 9.94E-02 | 8.81E-01 |
| rs157208   | 1 EPB41 | 0.17 Add | 0.94(0.75-1.18) | 5.77E-01 | 8.85E-01 |
| rs502393   | 1 EPB41 | 0.42 Add | 1.14(0.96-1.36) | 1.37E-01 | 8.93E-01 |
| rs2153165  | 1 EPB41 | 0.41 Dom | 1.23(0.95-1.59) | 1.10E-01 | 8.94E-01 |
| rs2486200  | 1 EPB41 | 0.41 Dom | 1.23(0.95-1.59) | 1.08E-01 | 8.95E-01 |
| rs6686151  | 1 EPB41 | 0.41 Add | 1.14(0.96-1.36) | 1.39E-01 | 8.97E-01 |
| rs12039988 | 1 EPB41 | 0.08 Dom | 1.26(0.9-1.77)  | 1.79E-01 | 8.97E-01 |
| rs12072831 | 1 EPB41 | 0.41 Add | 1.13(0.95-1.35) | 1.57E-01 | 9.09E-01 |
| rs2503015  | 1 EPB41 | 0.41 Add | 1.13(0.95-1.35) | 1.58E-01 | 9.10E-01 |
| rs2254241  | 1 EPB41 | 0.41 Add | 1.13(0.95-1.35) | 1.58E-01 | 9.10E-01 |
| rs7544914  | 1 EPB41 | 0.41 Add | 1.13(0.95-1.35) | 1.58E-01 | 9.10E-01 |
| rs6703599  | 1 EPB41 | 0.41 Add | 1.13(0.95-1.35) | 1.58E-01 | 9.10E-01 |
| rs2985337  | 1 EPB41 | 0.41 Add | 1.13(0.95-1.35) | 1.54E-01 | 9.15E-01 |
| rs2993713  | 1 EPB41 | 0.41 Add | 1.13(0.95-1.35) | 1.54E-01 | 9.16E-01 |
| rs3003631  | 1 EPB41 | 0.41 Add | 1.13(0.95-1.35) | 1.54E-01 | 9.16E-01 |
| rs2985338  | 1 EPB41 | 0.41 Add | 1.13(0.95-1.35) | 1.54E-01 | 9.16E-01 |
| rs2788890  | 1 EPB41 | 0.41 Add | 1.13(0.95-1.35) | 1.54E-01 | 9.16E-01 |

|            |         |          |                 |          |          |
|------------|---------|----------|-----------------|----------|----------|
| rs2788888  | 1 EPB41 | 0.41 Add | 1.13(0.95-1.35) | 1.54E-01 | 9.16E-01 |
| rs3003628  | 1 EPB41 | 0.41 Dom | 1.22(0.95-1.58) | 1.21E-01 | 9.17E-01 |
| rs157206   | 1 EPB41 | 0.16 Rec | 0.48(0.18-1.26) | 1.36E-01 | 9.18E-01 |
| rs2486198  | 1 EPB41 | 0.41 Add | 1.13(0.95-1.34) | 1.66E-01 | 9.22E-01 |
| rs12070152 | 1 EPB41 | 0.41 Add | 1.13(0.95-1.34) | 1.67E-01 | 9.23E-01 |
| rs10915208 | 1 EPB41 | 0.42 Rec | 0.78(0.57-1.08) | 1.34E-01 | 9.24E-01 |
| rs3003627  | 1 EPB41 | 0.41 Add | 1.13(0.95-1.34) | 1.77E-01 | 9.24E-01 |
| rs9426306  | 1 EPB41 | 0.41 Add | 1.13(0.95-1.34) | 1.77E-01 | 9.24E-01 |
| rs2985330  | 1 EPB41 | 0.41 Add | 1.13(0.95-1.34) | 1.78E-01 | 9.26E-01 |
| rs2985332  | 1 EPB41 | 0.41 Add | 1.13(0.95-1.34) | 1.78E-01 | 9.26E-01 |
| rs11581096 | 1 EPB41 | 0.23 Dom | 1.2(0.94-1.53)  | 1.36E-01 | 9.32E-01 |
| rs2985328  | 1 EPB41 | 0.17 Add | 0.93(0.74-1.17) | 5.24E-01 | 9.39E-01 |
| rs4578183  | 1 EPB41 | 0.17 Add | 0.93(0.74-1.17) | 5.24E-01 | 9.39E-01 |
| rs12045054 | 1 EPB41 | 0.42 Rec | 0.8(0.58-1.1)   | 1.64E-01 | 9.52E-01 |
| rs2985335  | 1 EPB41 | 0.41 Dom | 1.19(0.92-1.54) | 1.74E-01 | 9.53E-01 |
| rs2985329  | 1 EPB41 | 0.41 Dom | 1.19(0.92-1.54) | 1.77E-01 | 9.56E-01 |
| rs2249138  | 1 EPB41 | 0.42 Add | 1.13(0.95-1.34) | 1.69E-01 | 9.56E-01 |
| rs553253   | 1 EPB41 | 0.42 Add | 1.11(0.94-1.32) | 2.17E-01 | 9.57E-01 |
| rs2452788  | 1 EPB41 | 0.37 Rec | 1.08(0.77-1.53) | 6.58E-01 | 9.58E-01 |
| rs550712   | 1 EPB41 | 0.41 Dom | 1.19(0.92-1.53) | 1.90E-01 | 9.63E-01 |
| rs16837840 | 1 EPB41 | 0.42 Add | 0.94(0.79-1.11) | 4.69E-01 | 9.67E-01 |
| rs10915216 | 1 EPB41 | 0.50 Rec | 0.87(0.66-1.15) | 3.32E-01 | 9.71E-01 |
| rs204057   | 1 EPB41 | 0.17 Add | 0.92(0.73-1.16) | 4.85E-01 | 9.73E-01 |
| rs12045750 | 1 EPB41 | 0.44 Add | 0.92(0.77-1.09) | 3.39E-01 | 9.78E-01 |
| rs12038347 | 1 EPB41 | 0.42 Rec | 0.82(0.6-1.13)  | 2.35E-01 | 9.79E-01 |
| rs12027267 | 1 EPB41 | 0.08 Dom | 1.17(0.83-1.64) | 3.75E-01 | 9.79E-01 |
| rs4654390  | 1 EPB41 | 0.50 Rec | 0.88(0.66-1.16) | 3.64E-01 | 9.80E-01 |
| rs10915207 | 1 EPB41 | 0.21 Add | 0.89(0.72-1.1)  | 2.69E-01 | 9.81E-01 |
| rs12045777 | 1 EPB41 | 0.49 Dom | 1.16(0.88-1.52) | 3.03E-01 | 9.81E-01 |
| rs2985322  | 1 EPB41 | 0.16 Rec | 0.64(0.3-1.35)  | 2.37E-01 | 9.85E-01 |
| rs150089   | 1 EPB41 | 0.16 Rec | 0.64(0.3-1.35)  | 2.37E-01 | 9.85E-01 |
| rs12047323 | 1 EPB41 | 0.42 Add | 0.91(0.77-1.09) | 3.08E-01 | 9.85E-01 |
| rs203278   | 1 EPB41 | 0.16 Rec | 0.64(0.3-1.35)  | 2.37E-01 | 9.85E-01 |
| rs6656832  | 1 EPB41 | 0.16 Rec | 0.64(0.3-1.35)  | 2.37E-01 | 9.85E-01 |

|            |            |          |                 |          |          |
|------------|------------|----------|-----------------|----------|----------|
| rs204058   | 1 EPB41    | 0.16 Rec | 0.64(0.3-1.35)  | 2.37E-01 | 9.85E-01 |
| rs2985327  | 1 EPB41    | 0.16 Rec | 0.64(0.3-1.35)  | 2.37E-01 | 9.85E-01 |
| rs957633   | 1 EPB41    | 0.42 Add | 0.91(0.77-1.09) | 3.08E-01 | 9.85E-01 |
| rs4275422  | 1 EPB41    | 0.42 Add | 0.91(0.77-1.09) | 3.08E-01 | 9.85E-01 |
| rs157224   | 1 EPB41    | 0.12 Rec | 1.71(0.58-5.04) | 3.28E-01 | 9.86E-01 |
| rs157198   | 1 EPB41    | 0.12 Rec | 1.71(0.58-5.04) | 3.28E-01 | 9.86E-01 |
| rs157216   | 1 EPB41    | 0.12 Rec | 1.71(0.58-5.04) | 3.28E-01 | 9.86E-01 |
| rs157217   | 1 EPB41    | 0.12 Rec | 1.71(0.58-5.04) | 3.28E-01 | 9.86E-01 |
| rs2425188  | 20 EPB41L1 | 0.04 Add | 1.41(0.91-2.19) | 1.26E-01 | 7.86E-01 |
| rs2425185  | 20 EPB41L1 | 0.04 Add | 1.34(0.87-2.08) | 1.83E-01 | 8.93E-01 |
| rs2425191  | 20 EPB41L1 | 0.31 Rec | 1.39(0.91-2.11) | 1.23E-01 | 9.45E-01 |
| rs6141600  | 20 EPB41L1 | 0.25 Dom | 0.99(0.78-1.26) | 9.46E-01 | 9.46E-01 |
| rs3850528  | 20 EPB41L1 | 0.10 Dom | 1.01(0.74-1.38) | 9.36E-01 | 9.95E-01 |
| rs4142032  | 20 EPB41L1 | 0.14 Add | 0.89(0.7-1.15)  | 3.79E-01 | 9.97E-01 |
| rs1998147  | 20 EPB41L1 | 0.14 Add | 0.9(0.7-1.15)   | 4.02E-01 | 9.98E-01 |
| rs6060820  | 20 EPB41L1 | 0.14 Add | 0.9(0.7-1.15)   | 4.02E-01 | 9.98E-01 |
| rs6121163  | 20 EPB41L1 | 0.14 Add | 0.9(0.7-1.15)   | 4.02E-01 | 9.98E-01 |
| rs2179666  | 20 EPB41L1 | 0.14 Add | 0.9(0.7-1.15)   | 4.02E-01 | 9.98E-01 |
| rs6058435  | 20 EPB41L1 | 0.27 Dom | 0.9(0.7-1.14)   | 3.78E-01 | 9.98E-01 |
| rs11700298 | 20 EPB41L1 | 0.27 Dom | 0.9(0.7-1.14)   | 3.78E-01 | 9.98E-01 |
| rs709050   | 20 EPB41L1 | 0.26 Dom | 0.9(0.71-1.15)  | 4.05E-01 | 9.99E-01 |
| rs6058427  | 20 EPB41L1 | 0.14 Add | 0.91(0.71-1.16) | 4.35E-01 | 9.99E-01 |
| rs2281579  | 20 EPB41L1 | 0.14 Add | 0.91(0.71-1.16) | 4.35E-01 | 9.99E-01 |
| rs6058429  | 20 EPB41L1 | 0.14 Add | 0.91(0.71-1.16) | 4.35E-01 | 9.99E-01 |
| rs6060842  | 20 EPB41L1 | 0.14 Add | 0.91(0.71-1.16) | 4.35E-01 | 9.99E-01 |
| rs2590947  | 20 EPB41L1 | 0.14 Add | 0.91(0.71-1.16) | 4.35E-01 | 9.99E-01 |
| rs6060840  | 20 EPB41L1 | 0.14 Add | 0.91(0.71-1.16) | 4.35E-01 | 9.99E-01 |
| rs2752898  | 20 EPB41L1 | 0.24 Dom | 0.99(0.78-1.26) | 9.35E-01 | 9.99E-01 |
| rs2295568  | 20 EPB41L1 | 0.16 Dom | 0.93(0.71-1.21) | 5.67E-01 | 1.00E+00 |
| rs6142508  | 20 EPB41L1 | 0.10 Rec | 1.1(0.32-3.76)  | 8.74E-01 | 1.00E+00 |
| rs2247688  | 20 EPB41L1 | 0.25 Rec | 0.92(0.57-1.49) | 7.37E-01 | 1.00E+00 |
| rs2859715  | 20 EPB41L1 | 0.06 Add | 0.96(0.66-1.39) | 8.22E-01 | 1.00E+00 |
| rs6119695  | 20 EPB41L1 | 0.14 Rec | 0.77(0.27-2.17) | 6.19E-01 | 1.00E+00 |
| rs6142509  | 20 EPB41L1 | 0.05 Dom | 1.11(0.74-1.68) | 6.05E-01 | 1.00E+00 |

|            |            |          |                 |          |          |
|------------|------------|----------|-----------------|----------|----------|
| rs1046383  | 20 EPB41L1 | 0.27 Dom | 0.93(0.73-1.18) | 5.34E-01 | 1.00E+00 |
| rs11700361 | 20 EPB41L1 | 0.27 Dom | 0.93(0.73-1.18) | 5.34E-01 | 1.00E+00 |
| rs2590991  | 20 EPB41L1 | 0.24 Rec | 0.87(0.51-1.47) | 5.99E-01 | 1.00E+00 |
| rs3813918  | 20 EPB41L1 | 0.27 Dom | 0.93(0.73-1.18) | 5.34E-01 | 1.00E+00 |
| rs2590949  | 20 EPB41L1 | 0.24 Add | 0.96(0.79-1.17) | 6.85E-01 | 1.00E+00 |
| rs6121156  | 20 EPB41L1 | 0.14 Add | 0.94(0.73-1.21) | 6.40E-01 | 1.00E+00 |
| rs752697   | 20 EPB41L1 | 0.24 Rec | 0.85(0.51-1.44) | 5.55E-01 | 1.00E+00 |
| rs6142512  | 20 EPB41L1 | 0.10 Dom | 1.04(0.77-1.42) | 7.94E-01 | 1.00E+00 |
| rs2746103  | 20 EPB41L1 | 0.24 Rec | 0.81(0.47-1.39) | 4.44E-01 | 1.00E+00 |
| rs17093377 | 20 EPB41L1 | 0.14 Rec | 0.84(0.29-2.41) | 7.39E-01 | 1.00E+00 |
| rs6121179  | 20 EPB41L1 | 0.27 Dom | 0.93(0.73-1.19) | 5.65E-01 | 1.00E+00 |
| rs6060845  | 20 EPB41L1 | 0.19 Add | 0.94(0.76-1.17) | 5.79E-01 | 1.00E+00 |
| rs6060831  | 20 EPB41L1 | 0.02 Add | 0.89(0.5-1.59)  | 7.02E-01 | 1.00E+00 |
| rs6141601  | 20 EPB41L1 | 0.05 Add | 0.95(0.65-1.38) | 7.79E-01 | 1.00E+00 |
| rs9789814  | 20 EPB41L1 | 0.07 Dom | 1.06(0.75-1.51) | 7.39E-01 | 1.00E+00 |
| rs1043596  | 6 EPB41L2  | 0.29 Rec | 0.49(0.3-0.79)  | 4.01E-03 | 1.97E-01 |
| rs915172   | 6 EPB41L2  | 0.30 Rec | 0.52(0.33-0.84) | 7.34E-03 | 3.20E-01 |
| rs867707   | 6 EPB41L2  | 0.30 Rec | 0.52(0.33-0.84) | 7.34E-03 | 3.21E-01 |
| rs10457562 | 6 EPB41L2  | 0.05 Add | 0.62(0.41-0.92) | 1.85E-02 | 3.57E-01 |
| rs9402295  | 6 EPB41L2  | 0.05 Add | 0.62(0.41-0.92) | 1.85E-02 | 3.59E-01 |
| rs10457561 | 6 EPB41L2  | 0.06 Add | 0.62(0.42-0.92) | 1.85E-02 | 3.60E-01 |
| rs10457563 | 6 EPB41L2  | 0.05 Add | 0.62(0.41-0.92) | 1.85E-02 | 3.61E-01 |
| rs3777432  | 6 EPB41L2  | 0.05 Add | 0.62(0.42-0.93) | 1.96E-02 | 3.71E-01 |
| rs9385567  | 6 EPB41L2  | 0.06 Add | 0.63(0.42-0.93) | 1.99E-02 | 3.75E-01 |
| rs9375778  | 6 EPB41L2  | 0.06 Add | 0.63(0.42-0.93) | 1.99E-02 | 3.76E-01 |
| rs9388860  | 6 EPB41L2  | 0.06 Add | 0.63(0.42-0.93) | 1.99E-02 | 3.77E-01 |
| rs12194612 | 6 EPB41L2  | 0.27 Rec | 0.49(0.28-0.86) | 1.32E-02 | 4.42E-01 |
| rs6919007  | 6 EPB41L2  | 0.45 Add | 1.23(1.03-1.46) | 1.96E-02 | 6.33E-01 |
| rs9385564  | 6 EPB41L2  | 0.44 Dom | 1.35(1.04-1.76) | 2.43E-02 | 6.53E-01 |
| rs9492767  | 6 EPB41L2  | 0.22 Rec | 0.49(0.25-0.94) | 3.08E-02 | 7.07E-01 |
| rs3777434  | 6 EPB41L2  | 0.45 Add | 1.22(1.02-1.44) | 2.52E-02 | 7.07E-01 |
| rs2183967  | 6 EPB41L2  | 0.45 Add | 1.22(1.02-1.44) | 2.52E-02 | 7.08E-01 |
| rs9388863  | 6 EPB41L2  | 0.45 Add | 1.22(1.02-1.44) | 2.66E-02 | 7.20E-01 |
| rs3777435  | 6 EPB41L2  | 0.45 Add | 1.22(1.02-1.44) | 2.66E-02 | 7.21E-01 |

|            |           |          |                 |          |          |
|------------|-----------|----------|-----------------|----------|----------|
| rs7775013  | 6 EPB41L2 | 0.45 Add | 1.22(1.02-1.44) | 2.66E-02 | 7.22E-01 |
| rs3777436  | 6 EPB41L2 | 0.45 Add | 1.22(1.02-1.44) | 2.66E-02 | 7.22E-01 |
| rs3734186  | 6 EPB41L2 | 0.38 Add | 1.22(1.02-1.45) | 2.73E-02 | 7.29E-01 |
| rs17059963 | 6 EPB41L2 | 0.25 Rec | 0.58(0.34-0.97) | 3.70E-02 | 7.84E-01 |
| rs3777457  | 6 EPB41L2 | 0.25 Rec | 0.56(0.33-0.97) | 3.87E-02 | 7.91E-01 |
| rs12110524 | 6 EPB41L2 | 0.24 Rec | 0.55(0.31-0.98) | 4.12E-02 | 8.09E-01 |
| rs12206057 | 6 EPB41L2 | 0.24 Rec | 0.57(0.33-0.98) | 4.33E-02 | 8.23E-01 |
| rs6938586  | 6 EPB41L2 | 0.24 Rec | 0.57(0.33-0.98) | 4.33E-02 | 8.25E-01 |
| rs9402291  | 6 EPB41L2 | 0.39 Add | 1.2(1.01-1.44)  | 4.01E-02 | 8.32E-01 |
| rs933063   | 6 EPB41L2 | 0.49 Add | 1.19(1.01-1.42) | 4.20E-02 | 8.41E-01 |
| rs9402292  | 6 EPB41L2 | 0.48 Add | 1.19(1-1.41)    | 4.80E-02 | 8.72E-01 |
| rs17831009 | 6 EPB41L2 | 0.18 Add | 0.8(0.63-1)     | 5.22E-02 | 8.87E-01 |
| rs7760965  | 6 EPB41L2 | 0.47 Add | 1.18(1-1.4)     | 5.36E-02 | 8.93E-01 |
| rs17059938 | 6 EPB41L2 | 0.26 Rec | 0.62(0.38-1.02) | 6.10E-02 | 9.05E-01 |
| rs4897468  | 6 EPB41L2 | 0.48 Add | 1.18(1-1.4)     | 5.68E-02 | 9.06E-01 |
| rs6569707  | 6 EPB41L2 | 0.47 Add | 1.17(0.99-1.39) | 6.32E-02 | 9.12E-01 |
| rs3822865  | 6 EPB41L2 | 0.26 Rec | 0.63(0.39-1.04) | 6.92E-02 | 9.13E-01 |
| rs17059968 | 6 EPB41L2 | 0.26 Rec | 0.63(0.39-1.04) | 6.92E-02 | 9.13E-01 |
| rs17059853 | 6 EPB41L2 | 0.26 Rec | 0.63(0.39-1.04) | 6.92E-02 | 9.14E-01 |
| rs1999473  | 6 EPB41L2 | 0.26 Rec | 0.63(0.39-1.04) | 6.92E-02 | 9.14E-01 |
| rs10499181 | 6 EPB41L2 | 0.26 Rec | 0.63(0.39-1.04) | 6.92E-02 | 9.14E-01 |
| rs17059909 | 6 EPB41L2 | 0.26 Rec | 0.63(0.39-1.04) | 6.92E-02 | 9.14E-01 |
| rs3777438  | 6 EPB41L2 | 0.21 Rec | 0.56(0.3-1.04)  | 6.65E-02 | 9.15E-01 |
| rs928592   | 6 EPB41L2 | 0.14 Add | 0.78(0.61-1.02) | 6.52E-02 | 9.15E-01 |
| rs6569708  | 6 EPB41L2 | 0.47 Add | 1.17(0.99-1.39) | 6.59E-02 | 9.16E-01 |
| rs9388861  | 6 EPB41L2 | 0.47 Add | 1.17(0.99-1.39) | 6.59E-02 | 9.16E-01 |
| rs915171   | 6 EPB41L2 | 0.14 Rec | 0.46(0.16-1.31) | 1.45E-01 | 9.17E-01 |
| rs9492774  | 6 EPB41L2 | 0.31 Rec | 0.67(0.43-1.04) | 7.49E-02 | 9.31E-01 |
| rs2236078  | 6 EPB41L2 | 0.12 Rec | 0.32(0.08-1.22) | 9.58E-02 | 9.32E-01 |
| rs4142581  | 6 EPB41L2 | 0.26 Rec | 0.64(0.39-1.05) | 7.91E-02 | 9.33E-01 |
| rs10499178 | 6 EPB41L2 | 0.26 Rec | 0.64(0.39-1.05) | 7.91E-02 | 9.34E-01 |
| rs17059851 | 6 EPB41L2 | 0.26 Rec | 0.65(0.4-1.06)  | 8.38E-02 | 9.41E-01 |
| rs1413753  | 6 EPB41L2 | 0.27 Rec | 0.66(0.42-1.06) | 8.37E-02 | 9.43E-01 |
| rs17059681 | 6 EPB41L2 | 0.12 Rec | 0.39(0.12-1.24) | 1.11E-01 | 9.61E-01 |

|            |           |          |                 |          |          |
|------------|-----------|----------|-----------------|----------|----------|
| rs12664355 | 6 EPB41L2 | 0.12 Rec | 0.39(0.12-1.24) | 1.11E-01 | 9.61E-01 |
| rs17059683 | 6 EPB41L2 | 0.12 Rec | 0.39(0.12-1.24) | 1.11E-01 | 9.61E-01 |
| rs10499174 | 6 EPB41L2 | 0.12 Rec | 0.39(0.12-1.24) | 1.11E-01 | 9.61E-01 |
| rs1043598  | 6 EPB41L2 | 0.12 Rec | 0.39(0.12-1.24) | 1.11E-01 | 9.61E-01 |
| rs17059702 | 6 EPB41L2 | 0.12 Rec | 0.39(0.12-1.24) | 1.11E-01 | 9.61E-01 |
| rs17059698 | 6 EPB41L2 | 0.12 Rec | 0.39(0.12-1.24) | 1.11E-01 | 9.62E-01 |
| rs12965    | 6 EPB41L2 | 0.14 Rec | 0.47(0.19-1.18) | 1.10E-01 | 9.68E-01 |
| rs9321265  | 6 EPB41L2 | 0.22 Rec | 0.61(0.34-1.12) | 1.10E-01 | 9.72E-01 |
| rs9492775  | 6 EPB41L2 | 0.22 Rec | 0.61(0.34-1.12) | 1.10E-01 | 9.72E-01 |
| rs17059739 | 6 EPB41L2 | 0.26 Rec | 0.68(0.42-1.11) | 1.22E-01 | 9.80E-01 |
| rs3777433  | 6 EPB41L2 | 0.26 Rec | 0.68(0.42-1.11) | 1.22E-01 | 9.80E-01 |
| rs10499175 | 6 EPB41L2 | 0.26 Rec | 0.68(0.42-1.11) | 1.22E-01 | 9.80E-01 |
| rs10499176 | 6 EPB41L2 | 0.26 Rec | 0.68(0.42-1.11) | 1.22E-01 | 9.80E-01 |
| rs17059726 | 6 EPB41L2 | 0.26 Rec | 0.68(0.42-1.11) | 1.22E-01 | 9.80E-01 |
| rs17059735 | 6 EPB41L2 | 0.26 Rec | 0.68(0.42-1.11) | 1.22E-01 | 9.80E-01 |
| rs3822860  | 6 EPB41L2 | 0.26 Rec | 0.69(0.43-1.12) | 1.30E-01 | 9.85E-01 |
| rs17059810 | 6 EPB41L2 | 0.26 Rec | 0.69(0.43-1.12) | 1.30E-01 | 9.85E-01 |
| rs17059808 | 6 EPB41L2 | 0.26 Rec | 0.69(0.43-1.12) | 1.30E-01 | 9.85E-01 |
| rs714709   | 6 EPB41L2 | 0.26 Rec | 0.7(0.44-1.12)  | 1.37E-01 | 9.88E-01 |
| rs9375794  | 6 EPB41L2 | 0.42 Dom | 1.16(0.9-1.5)   | 2.55E-01 | 9.89E-01 |
| rs9375790  | 6 EPB41L2 | 0.42 Dom | 1.16(0.9-1.5)   | 2.55E-01 | 9.89E-01 |
| rs6916206  | 6 EPB41L2 | 0.42 Dom | 1.16(0.9-1.5)   | 2.55E-01 | 9.89E-01 |
| rs9388873  | 6 EPB41L2 | 0.42 Dom | 1.16(0.9-1.5)   | 2.55E-01 | 9.89E-01 |
| rs6905151  | 6 EPB41L2 | 0.42 Dom | 1.16(0.9-1.5)   | 2.55E-01 | 9.89E-01 |
| rs9402310  | 6 EPB41L2 | 0.42 Dom | 1.16(0.9-1.5)   | 2.55E-01 | 9.89E-01 |
| rs17059669 | 6 EPB41L2 | 0.26 Rec | 0.71(0.44-1.13) | 1.46E-01 | 9.91E-01 |
| rs11760051 | 6 EPB41L2 | 0.43 Dom | 1.16(0.89-1.49) | 2.71E-01 | 9.92E-01 |
| rs9398967  | 6 EPB41L2 | 0.43 Dom | 1.16(0.89-1.49) | 2.71E-01 | 9.92E-01 |
| rs9402306  | 6 EPB41L2 | 0.43 Dom | 1.16(0.89-1.49) | 2.71E-01 | 9.92E-01 |
| rs9375789  | 6 EPB41L2 | 0.43 Dom | 1.16(0.89-1.49) | 2.71E-01 | 9.92E-01 |
| rs12195366 | 6 EPB41L2 | 0.47 Dom | 1.22(0.93-1.6)  | 1.47E-01 | 9.92E-01 |
| rs12196734 | 6 EPB41L2 | 0.47 Dom | 1.22(0.93-1.6)  | 1.47E-01 | 9.92E-01 |
| rs3777447  | 6 EPB41L2 | 0.26 Rec | 0.71(0.44-1.14) | 1.53E-01 | 9.93E-01 |
| rs17059787 | 6 EPB41L2 | 0.26 Rec | 0.71(0.44-1.14) | 1.53E-01 | 9.93E-01 |



|            |           |          |                 |          |          |
|------------|-----------|----------|-----------------|----------|----------|
| rs3777448  | 6 EPB41L2 | 0.26 Rec | 0.71(0.44-1.14) | 1.53E-01 | 9.93E-01 |
| rs17059799 | 6 EPB41L2 | 0.26 Rec | 0.71(0.44-1.14) | 1.53E-01 | 9.93E-01 |
| rs17059760 | 6 EPB41L2 | 0.26 Rec | 0.71(0.44-1.14) | 1.53E-01 | 9.93E-01 |
| rs2275064  | 6 EPB41L2 | 0.26 Rec | 0.71(0.44-1.14) | 1.53E-01 | 9.93E-01 |
| rs17059801 | 6 EPB41L2 | 0.26 Rec | 0.71(0.44-1.14) | 1.53E-01 | 9.93E-01 |
| rs7752292  | 6 EPB41L2 | 0.49 Rec | 0.86(0.65-1.14) | 2.91E-01 | 9.94E-01 |
| rs3777456  | 6 EPB41L2 | 0.26 Rec | 0.71(0.44-1.14) | 1.62E-01 | 9.95E-01 |
| rs17180687 | 6 EPB41L2 | 0.09 Add | 0.84(0.62-1.15) | 2.85E-01 | 9.96E-01 |
| rs3777466  | 6 EPB41L2 | 0.50 Add | 1.11(0.94-1.31) | 2.26E-01 | 9.96E-01 |
| rs6921207  | 6 EPB41L2 | 0.45 Rec | 0.81(0.59-1.1)  | 1.74E-01 | 9.96E-01 |
| rs9375785  | 6 EPB41L2 | 0.43 Rec | 1.17(0.86-1.58) | 3.10E-01 | 9.96E-01 |
| rs9375787  | 6 EPB41L2 | 0.47 Dom | 1.2(0.92-1.58)  | 1.79E-01 | 9.97E-01 |
| rs2839942  | 6 EPB41L2 | 0.26 Rec | 0.73(0.46-1.16) | 1.82E-01 | 9.97E-01 |
| rs4895907  | 6 EPB41L2 | 0.04 Add | 1(0.63-1.58)    | 9.97E-01 | 9.97E-01 |
| rs9375788  | 6 EPB41L2 | 0.47 Dom | 1.2(0.92-1.58)  | 1.79E-01 | 9.97E-01 |
| rs3777461  | 6 EPB41L2 | 0.50 Rec | 0.83(0.63-1.09) | 1.83E-01 | 9.97E-01 |
| rs3777451  | 6 EPB41L2 | 0.26 Rec | 0.73(0.46-1.17) | 1.88E-01 | 9.97E-01 |
| rs12526896 | 6 EPB41L2 | 0.47 Rec | 0.82(0.61-1.1)  | 1.88E-01 | 9.97E-01 |
| rs12530288 | 6 EPB41L2 | 0.47 Rec | 0.82(0.61-1.1)  | 1.88E-01 | 9.97E-01 |
| rs6941712  | 6 EPB41L2 | 0.47 Rec | 0.82(0.61-1.1)  | 1.88E-01 | 9.97E-01 |
| rs2095961  | 6 EPB41L2 | 0.10 Dom | 0.86(0.63-1.17) | 3.50E-01 | 9.98E-01 |
| rs6922177  | 6 EPB41L2 | 0.10 Dom | 0.86(0.63-1.17) | 3.50E-01 | 9.98E-01 |
| rs6928986  | 6 EPB41L2 | 0.40 Rec | 0.8(0.57-1.12)  | 1.93E-01 | 9.98E-01 |
| rs6931804  | 6 EPB41L2 | 0.09 Dom | 0.85(0.61-1.18) | 3.21E-01 | 9.98E-01 |
| rs933064   | 6 EPB41L2 | 0.38 Rec | 0.8(0.57-1.13)  | 2.02E-01 | 9.98E-01 |
| rs12197829 | 6 EPB41L2 | 0.47 Dom | 1.19(0.91-1.56) | 2.04E-01 | 9.98E-01 |
| rs9372985  | 6 EPB41L2 | 0.10 Dom | 0.87(0.64-1.18) | 3.74E-01 | 9.98E-01 |
| rs6926250  | 6 EPB41L2 | 0.09 Add | 0.86(0.64-1.16) | 3.38E-01 | 9.99E-01 |
| rs6922045  | 6 EPB41L2 | 0.09 Add | 0.86(0.64-1.16) | 3.38E-01 | 9.99E-01 |
| rs3777453  | 6 EPB41L2 | 0.13 Rec | 0.66(0.25-1.7)  | 3.87E-01 | 9.99E-01 |
| rs9492755  | 6 EPB41L2 | 0.47 Rec | 0.83(0.62-1.11) | 2.15E-01 | 9.99E-01 |
| rs6975     | 6 EPB41L2 | 0.48 Rec | 0.84(0.63-1.11) | 2.18E-01 | 9.99E-01 |
| rs9375791  | 6 EPB41L2 | 0.23 Add | 0.9(0.74-1.1)   | 3.17E-01 | 9.99E-01 |
| rs13437326 | 6 EPB41L2 | 0.10 Dom | 0.87(0.64-1.19) | 3.92E-01 | 9.99E-01 |

|            |           |          |                 |          |          |
|------------|-----------|----------|-----------------|----------|----------|
| rs12193574 | 6 EPB41L2 | 0.50 Rec | 0.85(0.64-1.12) | 2.35E-01 | 9.99E-01 |
| rs4897472  | 6 EPB41L2 | 0.50 Rec | 0.85(0.64-1.12) | 2.35E-01 | 9.99E-01 |
| rs4897471  | 6 EPB41L2 | 0.50 Rec | 0.85(0.64-1.12) | 2.35E-01 | 9.99E-01 |
| rs3777455  | 6 EPB41L2 | 0.50 Rec | 0.84(0.64-1.11) | 2.30E-01 | 9.99E-01 |
| rs3798249  | 6 EPB41L2 | 0.50 Add | 0.91(0.77-1.08) | 2.87E-01 | 9.99E-01 |
| rs6569720  | 6 EPB41L2 | 0.13 Dom | 0.89(0.67-1.18) | 4.09E-01 | 9.99E-01 |
| rs9372988  | 6 EPB41L2 | 0.13 Dom | 0.89(0.67-1.18) | 4.09E-01 | 9.99E-01 |
| rs3822859  | 6 EPB41L2 | 0.26 Rec | 0.75(0.46-1.2)  | 2.30E-01 | 9.99E-01 |
| rs7765757  | 6 EPB41L2 | 0.13 Dom | 0.89(0.67-1.18) | 4.09E-01 | 9.99E-01 |
| rs3777441  | 6 EPB41L2 | 0.50 Add | 0.91(0.77-1.08) | 3.01E-01 | 9.99E-01 |
| rs3777442  | 6 EPB41L2 | 0.50 Add | 0.91(0.77-1.08) | 3.01E-01 | 9.99E-01 |
| rs3798250  | 6 EPB41L2 | 0.50 Add | 0.91(0.77-1.08) | 3.01E-01 | 9.99E-01 |
| rs2068147  | 6 EPB41L2 | 0.50 Add | 0.91(0.77-1.08) | 3.00E-01 | 9.99E-01 |
| rs6928920  | 6 EPB41L2 | 0.09 Add | 0.87(0.65-1.18) | 3.70E-01 | 9.99E-01 |
| rs12199765 | 6 EPB41L2 | 0.47 Rec | 0.83(0.62-1.12) | 2.25E-01 | 9.99E-01 |
| rs7769153  | 6 EPB41L2 | 0.13 Dom | 0.89(0.68-1.18) | 4.30E-01 | 9.99E-01 |
| rs1413754  | 6 EPB41L2 | 0.35 Rec | 0.8(0.55-1.16)  | 2.45E-01 | 9.99E-01 |
| rs4897485  | 6 EPB41L2 | 0.04 Add | 1(0.65-1.52)    | 9.85E-01 | 9.99E-01 |
| rs17785507 | 6 EPB41L2 | 0.04 Add | 1(0.65-1.52)    | 9.85E-01 | 9.99E-01 |
| rs7747881  | 6 EPB41L2 | 0.13 Rec | 0.72(0.29-1.78) | 4.77E-01 | 1.00E+00 |
| rs1338905  | 6 EPB41L2 | 0.13 Add | 0.9(0.7-1.16)   | 4.21E-01 | 1.00E+00 |
| rs3777450  | 6 EPB41L2 | 0.13 Add | 0.91(0.7-1.17)  | 4.46E-01 | 1.00E+00 |
| rs3777463  | 6 EPB41L2 | 0.13 Dom | 0.91(0.68-1.21) | 5.10E-01 | 1.00E+00 |
| rs954211   | 6 EPB41L2 | 0.09 Dom | 0.89(0.65-1.22) | 4.68E-01 | 1.00E+00 |
| rs2275063  | 6 EPB41L2 | 0.15 Add | 0.88(0.69-1.11) | 2.82E-01 | 1.00E+00 |
| rs9321260  | 6 EPB41L2 | 0.47 Rec | 0.85(0.64-1.14) | 2.88E-01 | 1.00E+00 |
| rs3777458  | 6 EPB41L2 | 0.47 Rec | 0.86(0.64-1.14) | 2.89E-01 | 1.00E+00 |
| rs4357159  | 6 EPB41L2 | 0.47 Rec | 0.85(0.64-1.14) | 2.88E-01 | 1.00E+00 |
| rs6569718  | 6 EPB41L2 | 0.13 Rec | 0.59(0.22-1.61) | 3.06E-01 | 1.00E+00 |
| rs1332491  | 6 EPB41L2 | 0.13 Rec | 0.59(0.22-1.61) | 3.06E-01 | 1.00E+00 |
| rs2151069  | 6 EPB41L2 | 0.13 Rec | 0.59(0.22-1.61) | 3.06E-01 | 1.00E+00 |
| rs2007339  | 6 EPB41L2 | 0.13 Rec | 0.59(0.22-1.61) | 3.06E-01 | 1.00E+00 |
| rs17059896 | 6 EPB41L2 | 0.13 Rec | 0.59(0.22-1.61) | 3.06E-01 | 1.00E+00 |
| rs13193246 | 6 EPB41L2 | 0.13 Rec | 0.59(0.22-1.61) | 3.06E-01 | 1.00E+00 |

|            |           |          |                 |          |          |
|------------|-----------|----------|-----------------|----------|----------|
| rs6900810  | 6 EPB41L2 | 0.13 Rec | 0.59(0.22-1.61) | 3.06E-01 | 1.00E+00 |
| rs2281487  | 6 EPB41L2 | 0.10 Dom | 0.89(0.66-1.22) | 4.78E-01 | 1.00E+00 |
| rs1811949  | 6 EPB41L2 | 0.08 Add | 0.91(0.66-1.25) | 5.63E-01 | 1.00E+00 |
| rs9492782  | 6 EPB41L2 | 0.08 Dom | 1.01(0.72-1.4)  | 9.70E-01 | 1.00E+00 |
| rs9492762  | 6 EPB41L2 | 0.11 Dom | 0.92(0.69-1.24) | 5.97E-01 | 1.00E+00 |
| rs3777464  | 6 EPB41L2 | 0.34 Rec | 0.84(0.58-1.22) | 3.60E-01 | 1.00E+00 |
| rs4895903  | 6 EPB41L2 | 0.04 Add | 0.91(0.59-1.39) | 6.50E-01 | 1.00E+00 |
| rs942      | 6 EPB41L2 | 0.09 Dom | 0.92(0.67-1.28) | 6.39E-01 | 1.00E+00 |
| rs4895902  | 6 EPB41L2 | 0.14 Rec | 0.86(0.36-2.07) | 7.44E-01 | 1.00E+00 |
| rs1855078  | 6 EPB41L2 | 0.07 Dom | 1.09(0.77-1.55) | 6.07E-01 | 1.00E+00 |
| rs3822864  | 6 EPB41L2 | 0.13 Add | 0.93(0.72-1.19) | 5.50E-01 | 1.00E+00 |
| rs2236081  | 6 EPB41L2 | 0.36 Rec | 0.86(0.6-1.23)  | 3.94E-01 | 1.00E+00 |
| rs9483206  | 6 EPB41L2 | 0.07 Dom | 0.92(0.65-1.3)  | 6.34E-01 | 1.00E+00 |
| rs12661081 | 6 EPB41L2 | 0.14 Dom | 0.89(0.68-1.18) | 4.32E-01 | 1.00E+00 |
| rs2281490  | 6 EPB41L2 | 0.34 Rec | 0.86(0.59-1.25) | 4.27E-01 | 1.00E+00 |
| rs6923182  | 6 EPB41L2 | 0.08 Add | 0.99(0.72-1.37) | 9.68E-01 | 1.00E+00 |
| rs9492784  | 6 EPB41L2 | 0.08 Add | 0.99(0.72-1.37) | 9.68E-01 | 1.00E+00 |
| rs7747059  | 6 EPB41L2 | 0.08 Add | 0.99(0.72-1.37) | 9.68E-01 | 1.00E+00 |
| rs9492785  | 6 EPB41L2 | 0.08 Add | 0.99(0.72-1.37) | 9.68E-01 | 1.00E+00 |
| rs12529894 | 6 EPB41L2 | 0.08 Add | 0.99(0.72-1.37) | 9.68E-01 | 1.00E+00 |
| rs12527605 | 6 EPB41L2 | 0.08 Add | 0.99(0.72-1.37) | 9.68E-01 | 1.00E+00 |
| rs11969461 | 6 EPB41L2 | 0.08 Add | 0.99(0.72-1.37) | 9.68E-01 | 1.00E+00 |
| rs2327006  | 6 EPB41L2 | 0.08 Add | 0.99(0.72-1.37) | 9.68E-01 | 1.00E+00 |
| rs7741148  | 6 EPB41L2 | 0.05 Add | 0.92(0.61-1.39) | 6.86E-01 | 1.00E+00 |
| rs4895901  | 6 EPB41L2 | 0.05 Add | 0.92(0.61-1.39) | 6.86E-01 | 1.00E+00 |
| rs9385568  | 6 EPB41L2 | 0.05 Add | 0.95(0.63-1.45) | 8.30E-01 | 1.00E+00 |
| rs7769678  | 6 EPB41L2 | 0.05 Add | 0.95(0.63-1.45) | 8.30E-01 | 1.00E+00 |
| rs10499177 | 6 EPB41L2 | 0.08 Dom | 1.05(0.76-1.45) | 7.77E-01 | 1.00E+00 |
| rs1413755  | 6 EPB41L2 | 0.06 Dom | 1.06(0.74-1.53) | 7.44E-01 | 1.00E+00 |
| rs1332492  | 6 EPB41L2 | 0.07 Dom | 1.08(0.77-1.54) | 6.46E-01 | 1.00E+00 |
| rs6906478  | 6 EPB41L2 | 0.05 Add | 0.95(0.64-1.41) | 7.98E-01 | 1.00E+00 |
| rs17059736 | 6 EPB41L2 | 0.08 Add | 0.95(0.7-1.31)  | 7.69E-01 | 1.00E+00 |
| rs17059925 | 6 EPB41L2 | 0.14 Add | 0.92(0.72-1.18) | 5.20E-01 | 1.00E+00 |
| rs7765007  | 6 EPB41L2 | 0.14 Add | 0.92(0.72-1.18) | 5.20E-01 | 1.00E+00 |

|            |           |          |                 |          |          |
|------------|-----------|----------|-----------------|----------|----------|
| rs872576   | 6 EPB41L2 | 0.06 Dom | 1.08(0.74-1.56) | 6.97E-01 | 1.00E+00 |
| rs2297853  | 6 EPB41L2 | 0.07 Add | 0.95(0.67-1.35) | 7.64E-01 | 1.00E+00 |
| rs4897484  | 6 EPB41L2 | 0.04 Add | 0.96(0.63-1.47) | 8.41E-01 | 1.00E+00 |
| rs4895908  | 6 EPB41L2 | 0.04 Add | 1.01(0.64-1.61) | 9.60E-01 | 1.00E+00 |
| rs28482889 | 6 EPB41L2 | 0.05 Add | 0.95(0.64-1.43) | 8.22E-01 | 1.00E+00 |
| rs6935108  | 6 EPB41L2 | 0.04 Add | 0.95(0.62-1.47) | 8.21E-01 | 1.00E+00 |
| rs9321263  | 6 EPB41L2 | 0.05 Add | 0.97(0.65-1.44) | 8.71E-01 | 1.00E+00 |
| rs6921396  | 6 EPB41L2 | 0.04 Add | 1.04(0.66-1.64) | 8.52E-01 | 1.00E+00 |
| rs6569716  | 6 EPB41L2 | 0.14 Add | 0.92(0.72-1.18) | 5.06E-01 | 1.00E+00 |
| rs17059678 | 6 EPB41L2 | 0.08 Add | 0.93(0.68-1.28) | 6.67E-01 | 1.00E+00 |
| rs6918160  | 6 EPB41L2 | 0.06 Add | 1.04(0.72-1.51) | 8.37E-01 | 1.00E+00 |
| rs12202038 | 6 EPB41L2 | 0.36 Rec | 0.88(0.61-1.27) | 4.92E-01 | 1.00E+00 |
| rs2236075  | 6 EPB41L2 | 0.36 Rec | 0.88(0.61-1.27) | 4.92E-01 | 1.00E+00 |
| rs17784418 | 6 EPB41L2 | 0.05 Add | 0.98(0.64-1.5)  | 9.25E-01 | 1.00E+00 |
| rs6938552  | 6 EPB41L2 | 0.04 Add | 0.98(0.62-1.53) | 9.14E-01 | 1.00E+00 |
| rs17770255 | 6 EPB41L2 | 0.04 Add | 0.97(0.62-1.52) | 8.95E-01 | 1.00E+00 |
| rs6941909  | 6 EPB41L2 | 0.08 Add | 0.97(0.71-1.34) | 8.62E-01 | 1.00E+00 |
| rs12528626 | 6 EPB41L2 | 0.08 Dom | 1.03(0.75-1.43) | 8.51E-01 | 1.00E+00 |
| rs4897473  | 6 EPB41L2 | 0.06 Dom | 1.02(0.7-1.48)  | 9.18E-01 | 1.00E+00 |
| rs9492776  | 6 EPB41L2 | 0.08 Add | 0.98(0.71-1.35) | 9.09E-01 | 1.00E+00 |
| rs2070827  | X FLNA    | 0.08 Add | 0.93(0.74-1.18) | 5.71E-01 | 6.12E-01 |
| rs2070822  | X FLNA    | 0.25 Dom | 0.89(0.67-1.18) | 4.07E-01 | 7.08E-01 |
| rs5945185  | X FLNA    | 0.27 Dom | 0.89(0.68-1.16) | 3.92E-01 | 7.26E-01 |
| rs17428    | X FLNA    | 0.24 Add | 0.95(0.83-1.1)  | 4.86E-01 | 7.31E-01 |
| rs1603     | 19 FOSB   | 0.28 Dom | 1.54(1.21-1.96) | 4.99E-04 | 8.72E-03 |
| rs7250901  | 19 FOSB   | 0.49 Rec | 0.64(0.48-0.85) | 2.23E-03 | 2.98E-02 |
| rs6509214  | 19 FOSB   | 0.49 Rec | 0.64(0.48-0.85) | 2.23E-03 | 2.98E-02 |
| rs7245548  | 19 FOSB   | 0.49 Rec | 0.64(0.48-0.85) | 2.23E-03 | 2.98E-02 |
| rs2276470  | 19 FOSB   | 0.41 Dom | 1.45(1.12-1.88) | 4.78E-03 | 5.80E-02 |
| rs2276469  | 19 FOSB   | 0.41 Dom | 1.44(1.11-1.87) | 5.90E-03 | 6.95E-02 |
| rs10402243 | 19 FOSB   | 0.40 Add | 0.84(0.71-1)    | 4.95E-02 | 2.89E-01 |
| rs10415949 | 19 FOSB   | 0.40 Add | 0.84(0.71-1)    | 5.56E-02 | 3.51E-01 |
| rs2238687  | 19 FOSB   | 0.40 Rec | 0.71(0.5-1)     | 4.74E-02 | 3.62E-01 |
| rs12373539 | 19 FOSB   | 0.40 Rec | 0.71(0.5-1)     | 4.74E-02 | 3.62E-01 |

|            |         |          |                  |          |          |
|------------|---------|----------|------------------|----------|----------|
| rs2238686  | 19 FOSB | 0.40 Rec | 0.71(0.5-1)      | 4.74E-02 | 3.62E-01 |
| rs3760846  | 19 FOSB | 0.22 Dom | 0.86(0.67-1.1)   | 2.40E-01 | 4.14E-01 |
| rs4511641  | 19 FOSB | 0.23 Rec | 0.63(0.35-1.14)  | 1.27E-01 | 5.32E-01 |
| rs10423854 | 19 FOSB | 0.28 Dom | 1.1(0.86-1.4)    | 4.56E-01 | 7.02E-01 |
| rs7022964  | 9 FREQ  | 0.03 Add | 0.54(0.32-0.9)   | 1.80E-02 | 3.61E-01 |
| rs887534   | 9 FREQ  | 0.03 Add | 0.54(0.32-0.9)   | 1.80E-02 | 3.63E-01 |
| rs4240446  | 9 FREQ  | 0.04 Add | 0.59(0.36-0.94)  | 2.69E-02 | 4.98E-01 |
| rs1342043  | 9 FREQ  | 0.04 Add | 0.63(0.41-0.98)  | 3.96E-02 | 6.40E-01 |
| rs3897499  | 9 FREQ  | 0.11 Rec | 3.03(1.14-8.04)  | 2.64E-02 | 7.29E-01 |
| rs868964   | 9 FREQ  | 0.04 Add | 0.63(0.39-1.01)  | 5.37E-02 | 7.33E-01 |
| rs7037293  | 9 FREQ  | 0.04 Add | 0.63(0.39-1.01)  | 5.37E-02 | 7.33E-01 |
| rs7867364  | 9 FREQ  | 0.03 Add | 1.67(1-2.81)     | 5.16E-02 | 7.35E-01 |
| rs7873936  | 9 FREQ  | 0.12 Rec | 4.85(1.11-21.16) | 3.54E-02 | 7.41E-01 |
| rs12346070 | 9 FREQ  | 0.10 Rec | 6.04(1.02-35.93) | 4.80E-02 | 7.77E-01 |
| rs10988645 | 9 FREQ  | 0.10 Rec | 6.04(1.02-35.93) | 4.80E-02 | 7.78E-01 |
| rs4836697  | 9 FREQ  | 0.10 Rec | 6.04(1.02-35.93) | 4.80E-02 | 7.78E-01 |
| rs4240447  | 9 FREQ  | 0.10 Rec | 6.04(1.02-35.93) | 4.80E-02 | 7.78E-01 |
| rs4836695  | 9 FREQ  | 0.10 Rec | 6.04(1.02-35.93) | 4.80E-02 | 7.78E-01 |
| rs7863731  | 9 FREQ  | 0.29 Rec | 0.92(0.59-1.43)  | 7.13E-01 | 9.17E-01 |
| rs3829905  | 9 FREQ  | 0.15 Dom | 0.77(0.59-1.01)  | 5.69E-02 | 9.36E-01 |
| rs947513   | 9 FREQ  | 0.14 Dom | 0.77(0.58-1.01)  | 6.13E-02 | 9.42E-01 |
| rs10819615 | 9 FREQ  | 0.09 Dom | 0.78(0.57-1.07)  | 1.21E-01 | 9.42E-01 |
| rs2900286  | 9 FREQ  | 0.15 Dom | 0.77(0.59-1.01)  | 6.15E-02 | 9.42E-01 |
| rs2277200  | 9 FREQ  | 0.15 Dom | 0.77(0.59-1.01)  | 6.15E-02 | 9.42E-01 |
| rs7023210  | 9 FREQ  | 0.14 Rec | 2.54(0.88-7.3)   | 8.41E-02 | 9.52E-01 |
| rs870811   | 9 FREQ  | 0.14 Dom | 0.81(0.61-1.07)  | 1.40E-01 | 9.75E-01 |
| rs11789529 | 9 FREQ  | 0.16 Rec | 0.55(0.23-1.32)  | 1.78E-01 | 9.76E-01 |
| rs13287767 | 9 FREQ  | 0.03 Add | 0.72(0.43-1.19)  | 1.94E-01 | 9.84E-01 |
| rs10819611 | 9 FREQ  | 0.13 Dom | 0.82(0.62-1.09)  | 1.71E-01 | 9.86E-01 |
| rs13288372 | 9 FREQ  | 0.13 Dom | 0.83(0.62-1.09)  | 1.80E-01 | 9.87E-01 |
| rs11552451 | 9 FREQ  | 0.11 Rec | 0.36(0.09-1.35)  | 1.30E-01 | 9.87E-01 |
| rs7856531  | 9 FREQ  | 0.13 Rec | 2.25(0.81-6.28)  | 1.22E-01 | 9.90E-01 |
| rs12003792 | 9 FREQ  | 0.09 Add | 1.02(0.75-1.37)  | 9.10E-01 | 9.92E-01 |
| rs9802616  | 9 FREQ  | 0.06 Add | 0.78(0.53-1.15)  | 2.15E-01 | 9.92E-01 |

|            |   |      |      |     |                 |          |          |
|------------|---|------|------|-----|-----------------|----------|----------|
| rs3780714  | 9 | FREQ | 0.05 | Add | 0.81(0.55-1.18) | 2.69E-01 | 9.98E-01 |
| rs12378342 | 9 | FREQ | 0.04 | Add | 0.8(0.52-1.23)  | 3.13E-01 | 9.98E-01 |
| rs3780715  | 9 | FREQ | 0.13 | Rec | 2.05(0.72-5.84) | 1.81E-01 | 9.99E-01 |
| rs7024495  | 9 | FREQ | 0.13 | Dom | 0.86(0.65-1.14) | 3.06E-01 | 9.99E-01 |
| rs7868148  | 9 | FREQ | 0.29 | Rec | 0.91(0.59-1.4)  | 6.57E-01 | 9.99E-01 |
| rs12376641 | 9 | FREQ | 0.03 | Add | 1.03(0.63-1.68) | 9.08E-01 | 9.99E-01 |
| rs1054879  | 9 | FREQ | 0.19 | Rec | 0.64(0.32-1.29) | 2.11E-01 | 9.99E-01 |
| rs1017112  | 9 | FREQ | 0.28 | Rec | 0.88(0.56-1.39) | 5.90E-01 | 9.99E-01 |
| rs3780712  | 9 | FREQ | 0.32 | Rec | 0.78(0.51-1.19) | 2.42E-01 | 1.00E+00 |
| rs10988625 | 9 | FREQ | 0.42 | Rec | 0.88(0.64-1.22) | 4.48E-01 | 1.00E+00 |
| rs1557123  | 9 | FREQ | 0.22 | Rec | 0.93(0.54-1.63) | 8.08E-01 | 1.00E+00 |
| rs7045735  | 9 | FREQ | 0.14 | Dom | 0.88(0.67-1.16) | 3.72E-01 | 1.00E+00 |
| rs4424362  | 9 | FREQ | 0.15 | Dom | 0.85(0.65-1.12) | 2.46E-01 | 1.00E+00 |
| rs7862394  | 9 | FREQ | 0.15 | Dom | 0.85(0.65-1.12) | 2.46E-01 | 1.00E+00 |
| rs917690   | 9 | FREQ | 0.15 | Dom | 0.85(0.65-1.12) | 2.51E-01 | 1.00E+00 |
| rs3780710  | 9 | FREQ | 0.39 | Rec | 0.88(0.62-1.25) | 4.78E-01 | 1.00E+00 |
| rs7849345  | 9 | FREQ | 0.17 | Add | 0.95(0.75-1.19) | 6.42E-01 | 1.00E+00 |
| rs3780708  | 9 | FREQ | 0.22 | Rec | 0.79(0.45-1.37) | 3.98E-01 | 1.00E+00 |
| rs10819609 | 9 | FREQ | 0.38 | Rec | 0.89(0.62-1.26) | 5.05E-01 | 1.00E+00 |
| rs4837480  | 9 | FREQ | 0.38 | Rec | 0.89(0.62-1.26) | 5.05E-01 | 1.00E+00 |
| rs4837479  | 9 | FREQ | 0.32 | Rec | 0.8(0.52-1.22)  | 3.04E-01 | 1.00E+00 |
| rs3824542  | 9 | FREQ | 0.32 | Rec | 0.8(0.52-1.22)  | 3.04E-01 | 1.00E+00 |
| rs13710    | 9 | FREQ | 0.21 | Dom | 0.93(0.72-1.19) | 5.56E-01 | 1.00E+00 |
| rs7847694  | 9 | FREQ | 0.25 | Rec | 0.79(0.47-1.35) | 3.95E-01 | 1.00E+00 |
| rs3780709  | 9 | FREQ | 0.09 | Dom | 0.89(0.65-1.22) | 4.76E-01 | 1.00E+00 |
| rs10819610 | 9 | FREQ | 0.15 | Dom | 0.87(0.66-1.15) | 3.31E-01 | 1.00E+00 |
| rs709611   | 9 | FREQ | 0.20 | Rec | 0.9(0.5-1.64)   | 7.37E-01 | 1.00E+00 |
| rs3780711  | 9 | FREQ | 0.40 | Add | 0.94(0.78-1.12) | 4.58E-01 | 1.00E+00 |
| rs3780707  | 9 | FREQ | 0.38 | Add | 0.93(0.78-1.12) | 4.48E-01 | 1.00E+00 |
| rs10988653 | 9 | FREQ | 0.07 | Dom | 1.05(0.73-1.51) | 7.86E-01 | 1.00E+00 |
| rs740918   | 9 | FREQ | 0.10 | Dom | 0.91(0.67-1.24) | 5.60E-01 | 1.00E+00 |
| rs3824544  | 9 | FREQ | 0.09 | Dom | 0.91(0.66-1.25) | 5.63E-01 | 1.00E+00 |
| rs1009502  | 9 | FREQ | 0.10 | Dom | 0.91(0.67-1.24) | 5.46E-01 | 1.00E+00 |
| rs7852859  | 9 | FREQ | 0.08 | Dom | 0.9(0.65-1.26)  | 5.55E-01 | 1.00E+00 |

|            |         |          |                 |          |          |
|------------|---------|----------|-----------------|----------|----------|
| rs8121252  | 20 GNAS | 0.28 Add | 1.3(1.08-1.57)  | 6.29E-03 | 2.63E-01 |
| rs13831    | 20 GNAS | 0.28 Add | 1.3(1.07-1.56)  | 6.82E-03 | 2.80E-01 |
| rs6128461  | 20 GNAS | 0.31 Add | 1.29(1.07-1.55) | 7.28E-03 | 2.94E-01 |
| rs6026592  | 20 GNAS | 0.31 Add | 1.28(1.07-1.54) | 7.87E-03 | 3.11E-01 |
| rs6026574  | 20 GNAS | 0.29 Rec | 1.77(1.15-2.73) | 9.37E-03 | 3.16E-01 |
| rs7121     | 20 GNAS | 0.34 Add | 1.27(1.05-1.52) | 1.15E-02 | 4.00E-01 |
| rs2057291  | 20 GNAS | 0.27 Add | 1.27(1.05-1.54) | 1.20E-02 | 4.01E-01 |
| rs6026584  | 20 GNAS | 0.29 Add | 1.27(1.05-1.53) | 1.36E-02 | 4.35E-01 |
| rs4812042  | 20 GNAS | 0.29 Add | 1.26(1.05-1.52) | 1.45E-02 | 4.51E-01 |
| rs6100269  | 20 GNAS | 0.10 Dom | 0.73(0.53-1.01) | 5.46E-02 | 6.13E-01 |
| rs3730168  | 20 GNAS | 0.26 Dom | 1.32(1.04-1.68) | 2.51E-02 | 6.15E-01 |
| rs6015389  | 20 GNAS | 0.01 Add | 0.48(0.22-1.05) | 6.68E-02 | 6.28E-01 |
| rs1800900  | 20 GNAS | 0.17 Dom | 0.76(0.58-0.98) | 3.79E-02 | 7.36E-01 |
| rs6026561  | 20 GNAS | 0.01 Add | 0.51(0.24-1.13) | 9.61E-02 | 7.64E-01 |
| rs3761264  | 20 GNAS | 0.18 Dom | 0.77(0.6-1)     | 4.97E-02 | 8.18E-01 |
| rs8125112  | 20 GNAS | 0.01 Add | 0.54(0.25-1.18) | 1.23E-01 | 8.33E-01 |
| rs3787496  | 20 GNAS | 0.07 Add | 0.74(0.52-1.06) | 1.03E-01 | 8.44E-01 |
| rs6026593  | 20 GNAS | 0.10 Add | 0.77(0.58-1.02) | 6.96E-02 | 8.58E-01 |
| rs6123832  | 20 GNAS | 0.18 Dom | 0.78(0.61-1.01) | 6.34E-02 | 8.62E-01 |
| rs965808   | 20 GNAS | 0.18 Dom | 0.78(0.6-1.01)  | 6.43E-02 | 8.64E-01 |
| rs12479894 | 20 GNAS | 0.01 Add | 0.55(0.24-1.25) | 1.51E-01 | 8.76E-01 |
| rs6026557  | 20 GNAS | 0.10 Rec | 0.27(0.05-1.34) | 1.09E-01 | 8.83E-01 |
| rs2295583  | 20 GNAS | 0.05 Add | 0.75(0.51-1.11) | 1.57E-01 | 8.97E-01 |
| rs2180696  | 20 GNAS | 0.36 Add | 1.14(0.96-1.36) | 1.27E-01 | 9.02E-01 |
| rs234628   | 20 GNAS | 0.33 Dom | 1.03(0.81-1.31) | 8.24E-01 | 9.35E-01 |
| rs35113254 | 20 GNAS | 0.01 Add | 0.61(0.27-1.34) | 2.19E-01 | 9.37E-01 |
| rs6026562  | 20 GNAS | 0.01 Add | 0.61(0.27-1.34) | 2.19E-01 | 9.37E-01 |
| rs4812040  | 20 GNAS | 0.17 Add | 0.83(0.66-1.05) | 1.17E-01 | 9.38E-01 |
| rs4810147  | 20 GNAS | 0.17 Add | 0.84(0.66-1.06) | 1.35E-01 | 9.60E-01 |
| rs3787493  | 20 GNAS | 0.32 Dom | 1.08(0.85-1.38) | 5.13E-01 | 9.61E-01 |
| rs6123833  | 20 GNAS | 0.17 Add | 0.84(0.66-1.06) | 1.37E-01 | 9.62E-01 |
| rs2145288  | 20 GNAS | 0.16 Rec | 0.55(0.22-1.37) | 1.99E-01 | 9.79E-01 |
| rs234630   | 20 GNAS | 0.14 Rec | 0.51(0.19-1.38) | 1.85E-01 | 9.80E-01 |
| rs234621   | 20 GNAS | 0.27 Dom | 1.09(0.85-1.38) | 4.99E-01 | 9.89E-01 |

|            |         |          |                 |          |          |
|------------|---------|----------|-----------------|----------|----------|
| rs234625   | 20 GNAS | 0.27 Dom | 1.09(0.85-1.38) | 4.99E-01 | 9.89E-01 |
| rs234618   | 20 GNAS | 0.27 Dom | 1.09(0.85-1.38) | 4.99E-01 | 9.89E-01 |
| rs234629   | 20 GNAS | 0.33 Dom | 1.04(0.81-1.32) | 7.75E-01 | 9.91E-01 |
| rs12625436 | 20 GNAS | 0.36 Dom | 0.95(0.75-1.22) | 7.07E-01 | 9.92E-01 |
| rs919197   | 20 GNAS | 0.32 Dom | 1.11(0.87-1.41) | 4.09E-01 | 9.96E-01 |
| rs919196   | 20 GNAS | 0.18 Rec | 1.28(0.64-2.56) | 4.89E-01 | 9.97E-01 |
| rs4810148  | 20 GNAS | 0.34 Dom | 1.04(0.82-1.33) | 7.32E-01 | 9.98E-01 |
| rs6123836  | 20 GNAS | 0.34 Dom | 1.04(0.82-1.33) | 7.32E-01 | 9.98E-01 |
| rs7271854  | 20 GNAS | 0.34 Add | 1.07(0.89-1.28) | 4.98E-01 | 9.98E-01 |
| rs3730170  | 20 GNAS | 0.02 Dom | 0.83(0.42-1.66) | 6.07E-01 | 9.98E-01 |
| rs151331   | 20 GNAS | 0.27 Dom | 1.1(0.86-1.4)   | 4.61E-01 | 9.98E-01 |
| rs6026567  | 20 GNAS | 0.35 Rec | 1.21(0.83-1.77) | 3.17E-01 | 9.99E-01 |
| rs234627   | 20 GNAS | 0.26 Add | 1.04(0.85-1.27) | 7.18E-01 | 9.99E-01 |
| rs7273251  | 20 GNAS | 0.01 Add | 1.27(0.53-3.05) | 5.91E-01 | 9.99E-01 |
| rs234623   | 20 GNAS | 0.45 Dom | 1.13(0.87-1.48) | 3.54E-01 | 9.99E-01 |
| rs2266997  | 22 GNAZ | 0.39 Rec | 1.45(1.05-2.01) | 2.46E-02 | 4.24E-01 |
| rs2266998  | 22 GNAZ | 0.39 Rec | 1.45(1.05-2.01) | 2.46E-02 | 4.25E-01 |
| rs2330338  | 22 GNAZ | 0.40 Rec | 1.42(1.03-1.96) | 3.31E-02 | 5.12E-01 |
| rs5751579  | 22 GNAZ | 0.39 Rec | 1.43(1.03-1.98) | 3.51E-02 | 5.30E-01 |
| rs885962   | 22 GNAZ | 0.40 Rec | 1.4(1.02-1.94)  | 3.99E-02 | 5.69E-01 |
| rs5751574  | 22 GNAZ | 0.42 Add | 1.18(1-1.41)    | 5.48E-02 | 5.78E-01 |
| rs1989778  | 22 GNAZ | 0.39 Rec | 1.39(1.01-1.93) | 4.57E-02 | 6.09E-01 |
| rs1989777  | 22 GNAZ | 0.39 Rec | 1.39(1.01-1.93) | 4.57E-02 | 6.09E-01 |
| rs739362   | 22 GNAZ | 0.38 Rec | 1.39(1-1.94)    | 5.08E-02 | 6.45E-01 |
| rs6003502  | 22 GNAZ | 0.39 Rec | 1.38(1-1.9)     | 5.36E-02 | 6.60E-01 |
| rs874138   | 22 GNAZ | 0.39 Rec | 1.38(1-1.9)     | 5.36E-02 | 6.60E-01 |
| rs3788346  | 22 GNAZ | 0.40 Rec | 1.38(1-1.9)     | 5.36E-02 | 6.61E-01 |
| rs1805058  | 22 GNAZ | 0.39 Rec | 1.38(1-1.9)     | 5.36E-02 | 6.61E-01 |
| rs4822354  | 22 GNAZ | 0.40 Rec | 1.38(1-1.9)     | 5.36E-02 | 6.61E-01 |
| rs4820536  | 22 GNAZ | 0.40 Rec | 1.38(1-1.9)     | 5.36E-02 | 6.61E-01 |
| rs2266995  | 22 GNAZ | 0.39 Rec | 1.38(1-1.9)     | 5.36E-02 | 6.61E-01 |
| rs2330336  | 22 GNAZ | 0.39 Rec | 1.38(1-1.9)     | 5.36E-02 | 6.61E-01 |
| rs2266996  | 22 GNAZ | 0.41 Rec | 1.36(0.99-1.87) | 5.49E-02 | 6.68E-01 |
| rs3788342  | 22 GNAZ | 0.39 Rec | 1.37(0.99-1.9)  | 5.49E-02 | 6.68E-01 |



|            |         |          |                 |          |          |
|------------|---------|----------|-----------------|----------|----------|
| rs3788343  | 22 GNAZ | 0.39 Rec | 1.37(0.99-1.9)  | 5.49E-02 | 6.68E-01 |
| rs5751576  | 22 GNAZ | 0.39 Rec | 1.37(0.99-1.9)  | 5.49E-02 | 6.68E-01 |
| rs3827315  | 22 GNAZ | 0.39 Rec | 1.37(0.99-1.9)  | 5.49E-02 | 6.68E-01 |
| rs1989776  | 22 GNAZ | 0.39 Rec | 1.37(0.99-1.9)  | 5.49E-02 | 6.69E-01 |
| rs5759580  | 22 GNAZ | 0.39 Rec | 1.37(0.99-1.9)  | 5.49E-02 | 6.69E-01 |
| rs5751578  | 22 GNAZ | 0.39 Rec | 1.37(0.99-1.9)  | 5.49E-02 | 6.69E-01 |
| rs3788340  | 22 GNAZ | 0.41 Dom | 1.27(0.99-1.64) | 6.24E-02 | 6.75E-01 |
| rs6519411  | 22 GNAZ | 0.40 Rec | 1.36(0.98-1.88) | 6.41E-02 | 7.09E-01 |
| rs3810614  | 22 GNAZ | 0.39 Rec | 1.36(0.98-1.89) | 6.48E-02 | 7.12E-01 |
| rs3788341  | 22 GNAZ | 0.45 Add | 1.17(0.99-1.4)  | 6.74E-02 | 7.20E-01 |
| rs1858746  | 22 GNAZ | 0.41 Rec | 1.33(0.97-1.83) | 7.62E-02 | 7.53E-01 |
| rs3788339  | 22 GNAZ | 0.36 Add | 1.16(0.97-1.38) | 1.01E-01 | 7.57E-01 |
| rs2283802  | 22 GNAZ | 0.37 Rec | 1.35(0.96-1.91) | 8.56E-02 | 7.75E-01 |
| rs3788337  | 22 GNAZ | 0.43 Dom | 1.23(0.95-1.59) | 1.11E-01 | 8.46E-01 |
| rs13055979 | 22 GNAZ | 0.05 Add | 0.78(0.51-1.17) | 2.30E-01 | 8.85E-01 |
| rs9306383  | 22 GNAZ | 0.06 Dom | 1.04(0.71-1.51) | 8.38E-01 | 8.91E-01 |
| rs4820537  | 22 GNAZ | 0.40 Rec | 1.26(0.91-1.75) | 1.62E-01 | 9.29E-01 |
| rs12484077 | 22 GNAZ | 0.06 Add | 0.97(0.68-1.37) | 8.43E-01 | 9.75E-01 |
| rs9624019  | 22 GNAZ | 0.38 Dom | 1.16(0.91-1.49) | 2.28E-01 | 9.76E-01 |
| rs3788351  | 22 GNAZ | 0.43 Rec | 1.19(0.87-1.62) | 2.81E-01 | 9.84E-01 |
| rs5751583  | 22 GNAZ | 0.49 Dom | 0.86(0.65-1.13) | 2.71E-01 | 9.86E-01 |
| rs885963   | 22 GNAZ | 0.43 Rec | 1.17(0.86-1.59) | 3.11E-01 | 9.86E-01 |
| rs885965   | 22 GNAZ | 0.44 Rec | 1.17(0.86-1.59) | 3.11E-01 | 9.86E-01 |
| rs756631   | 22 GNAZ | 0.44 Rec | 1.17(0.86-1.59) | 3.11E-01 | 9.86E-01 |
| rs2267005  | 22 GNAZ | 0.44 Rec | 1.17(0.86-1.59) | 3.11E-01 | 9.86E-01 |
| rs2266999  | 22 GNAZ | 0.45 Rec | 1.14(0.85-1.54) | 3.68E-01 | 9.88E-01 |
| rs1051875  | 22 GNAZ | 0.43 Rec | 1.17(0.85-1.6)  | 3.29E-01 | 9.89E-01 |
| rs916584   | 22 GNAZ | 0.43 Rec | 1.17(0.85-1.6)  | 3.29E-01 | 9.89E-01 |
| rs5751587  | 22 GNAZ | 0.43 Rec | 1.17(0.85-1.6)  | 3.29E-01 | 9.89E-01 |
| rs6003518  | 22 GNAZ | 0.43 Rec | 1.17(0.85-1.6)  | 3.29E-01 | 9.89E-01 |
| rs3788350  | 22 GNAZ | 0.43 Rec | 1.17(0.85-1.6)  | 3.29E-01 | 9.89E-01 |
| rs4822359  | 22 GNAZ | 0.43 Rec | 1.17(0.85-1.6)  | 3.29E-01 | 9.89E-01 |
| rs3788347  | 22 GNAZ | 0.43 Rec | 1.17(0.85-1.6)  | 3.29E-01 | 9.89E-01 |
| rs4822357  | 22 GNAZ | 0.43 Rec | 1.17(0.85-1.6)  | 3.29E-01 | 9.89E-01 |

|            |         |          |                 |          |          |
|------------|---------|----------|-----------------|----------|----------|
| rs916585   | 22 GNAZ | 0.43 Rec | 1.17(0.85-1.6)  | 3.29E-01 | 9.89E-01 |
| rs916583   | 22 GNAZ | 0.43 Rec | 1.17(0.85-1.6)  | 3.29E-01 | 9.89E-01 |
| rs3788348  | 22 GNAZ | 0.43 Rec | 1.17(0.85-1.6)  | 3.29E-01 | 9.89E-01 |
| rs885964   | 22 GNAZ | 0.43 Rec | 1.17(0.85-1.59) | 3.30E-01 | 9.89E-01 |
| rs756632   | 22 GNAZ | 0.05 Add | 1.1(0.74-1.63)  | 6.39E-01 | 9.89E-01 |
| rs9612225  | 22 GNAZ | 0.04 Add | 0.93(0.62-1.4)  | 7.33E-01 | 9.89E-01 |
| rs9612237  | 22 GNAZ | 0.43 Rec | 1.15(0.84-1.57) | 3.82E-01 | 9.89E-01 |
| rs2267003  | 22 GNAZ | 0.42 Rec | 1.17(0.85-1.6)  | 3.38E-01 | 9.90E-01 |
| rs2267001  | 22 GNAZ | 0.42 Rec | 1.17(0.85-1.6)  | 3.38E-01 | 9.90E-01 |
| rs2283803  | 22 GNAZ | 0.41 Rec | 1.15(0.84-1.59) | 3.76E-01 | 9.91E-01 |
| rs2267000  | 22 GNAZ | 0.41 Rec | 1.15(0.84-1.59) | 3.76E-01 | 9.91E-01 |
| rs13054985 | 22 GNAZ | 0.42 Rec | 1.15(0.84-1.58) | 3.81E-01 | 9.91E-01 |
| rs2267004  | 22 GNAZ | 0.42 Rec | 1.15(0.84-1.58) | 3.81E-01 | 9.91E-01 |
| rs5759593  | 22 GNAZ | 0.42 Rec | 1.16(0.85-1.59) | 3.43E-01 | 9.91E-01 |
| rs9612234  | 22 GNAZ | 0.43 Rec | 1.16(0.85-1.59) | 3.52E-01 | 9.92E-01 |
| rs13054904 | 22 GNAZ | 0.04 Add | 0.94(0.62-1.42) | 7.66E-01 | 9.93E-01 |
| rs9608071  | 22 GNAZ | 0.04 Add | 0.94(0.62-1.42) | 7.66E-01 | 9.93E-01 |
| rs13054331 | 22 GNAZ | 0.04 Add | 0.94(0.62-1.42) | 7.66E-01 | 9.93E-01 |
| rs5751589  | 22 GNAZ | 0.43 Rec | 1.16(0.85-1.58) | 3.58E-01 | 9.93E-01 |
| rs2157710  | 22 GNAZ | 0.41 Add | 1.06(0.9-1.26)  | 4.76E-01 | 9.94E-01 |
| rs12950752 | 17 GRB2 | 0.08 Add | 1.26(0.92-1.72) | 1.44E-01 | 7.07E-01 |
| rs2053158  | 17 GRB2 | 0.06 Add | 1.29(0.91-1.83) | 1.46E-01 | 7.11E-01 |
| rs2053156  | 17 GRB2 | 0.06 Add | 1.29(0.91-1.82) | 1.52E-01 | 7.29E-01 |
| rs9909076  | 17 GRB2 | 0.06 Add | 1.29(0.91-1.82) | 1.52E-01 | 7.29E-01 |
| rs4789189  | 17 GRB2 | 0.06 Add | 1.29(0.91-1.82) | 1.52E-01 | 7.30E-01 |
| rs6501775  | 17 GRB2 | 0.07 Add | 1.27(0.91-1.77) | 1.57E-01 | 7.45E-01 |
| rs4789178  | 17 GRB2 | 0.06 Add | 1.28(0.9-1.81)  | 1.66E-01 | 7.53E-01 |
| rs930297   | 17 GRB2 | 0.06 Add | 1.27(0.9-1.81)  | 1.72E-01 | 7.62E-01 |
| rs7207618  | 17 GRB2 | 0.09 Add | 1.24(0.91-1.67) | 1.69E-01 | 7.63E-01 |
| rs7222002  | 17 GRB2 | 0.06 Add | 1.27(0.9-1.8)   | 1.72E-01 | 7.64E-01 |
| rs4789173  | 17 GRB2 | 0.06 Add | 1.27(0.9-1.8)   | 1.72E-01 | 7.64E-01 |
| rs9902966  | 17 GRB2 | 0.06 Add | 1.27(0.9-1.8)   | 1.72E-01 | 7.64E-01 |
| rs2033607  | 17 GRB2 | 0.06 Add | 1.27(0.9-1.8)   | 1.72E-01 | 7.64E-01 |
| rs4789176  | 17 GRB2 | 0.06 Add | 1.27(0.9-1.8)   | 1.72E-01 | 7.64E-01 |

|            |         |          |                 |          |          |
|------------|---------|----------|-----------------|----------|----------|
| rs1369299  | 17 GRB2 | 0.06 Add | 1.27(0.9-1.8)   | 1.72E-01 | 7.64E-01 |
| rs9302990  | 17 GRB2 | 0.06 Add | 1.27(0.9-1.8)   | 1.72E-01 | 7.65E-01 |
| rs6501786  | 17 GRB2 | 0.06 Add | 1.26(0.89-1.78) | 2.01E-01 | 8.13E-01 |
| rs8065441  | 17 GRB2 | 0.06 Add | 1.26(0.89-1.79) | 2.01E-01 | 8.13E-01 |
| rs2117563  | 17 GRB2 | 0.06 Add | 1.26(0.89-1.78) | 2.01E-01 | 8.13E-01 |
| rs4789181  | 17 GRB2 | 0.06 Add | 1.26(0.89-1.78) | 2.01E-01 | 8.13E-01 |
| rs9892166  | 17 GRB2 | 0.09 Add | 1.21(0.91-1.61) | 1.93E-01 | 8.15E-01 |
| rs16967789 | 17 GRB2 | 0.02 Dom | 1.08(0.63-1.88) | 7.76E-01 | 8.15E-01 |
| rs4789182  | 17 GRB2 | 0.09 Add | 1.21(0.91-1.61) | 1.93E-01 | 8.15E-01 |
| rs12946365 | 17 GRB2 | 0.09 Add | 1.21(0.91-1.6)  | 1.94E-01 | 8.17E-01 |
| rs4789170  | 17 GRB2 | 0.09 Add | 1.2(0.9-1.61)   | 2.04E-01 | 8.25E-01 |
| rs9912608  | 17 GRB2 | 0.09 Add | 1.2(0.9-1.61)   | 2.04E-01 | 8.26E-01 |
| rs4559942  | 17 GRB2 | 0.09 Add | 1.2(0.9-1.61)   | 2.09E-01 | 8.30E-01 |
| rs7219     | 17 GRB2 | 0.10 Add | 1.23(0.94-1.62) | 1.26E-01 | 8.32E-01 |
| rs930296   | 17 GRB2 | 0.06 Add | 1.24(0.86-1.8)  | 2.44E-01 | 8.50E-01 |
| rs8079197  | 17 GRB2 | 0.09 Add | 1.19(0.89-1.59) | 2.30E-01 | 8.51E-01 |
| rs4542691  | 17 GRB2 | 0.09 Add | 1.19(0.89-1.59) | 2.30E-01 | 8.51E-01 |
| rs8067903  | 17 GRB2 | 0.06 Add | 1.24(0.87-1.77) | 2.37E-01 | 8.51E-01 |
| rs12600908 | 17 GRB2 | 0.03 Dom | 1.09(0.63-1.87) | 7.56E-01 | 8.52E-01 |
| rs9897815  | 17 GRB2 | 0.02 Dom | 1.12(0.63-2)    | 7.02E-01 | 8.72E-01 |
| rs9909443  | 17 GRB2 | 0.03 Dom | 1.13(0.69-1.86) | 6.17E-01 | 8.89E-01 |
| rs9914731  | 17 GRB2 | 0.03 Add | 1.3(0.79-2.14)  | 3.03E-01 | 8.93E-01 |
| rs4789188  | 17 GRB2 | 0.03 Add | 1.3(0.79-2.14)  | 3.03E-01 | 8.93E-01 |
| rs4788891  | 17 GRB2 | 0.03 Add | 1.3(0.79-2.14)  | 3.03E-01 | 8.94E-01 |
| rs8081778  | 17 GRB2 | 0.06 Add | 1.21(0.85-1.71) | 2.84E-01 | 8.97E-01 |
| rs4350602  | 17 GRB2 | 0.09 Add | 1.17(0.88-1.56) | 2.72E-01 | 8.98E-01 |
| rs9908820  | 17 GRB2 | 0.06 Add | 1.19(0.83-1.7)  | 3.43E-01 | 9.02E-01 |
| rs12940914 | 17 GRB2 | 0.03 Add | 1.15(0.66-2.01) | 6.14E-01 | 9.41E-01 |
| rs4789186  | 17 GRB2 | 0.03 Add | 1.15(0.66-2.01) | 6.14E-01 | 9.41E-01 |
| rs4788889  | 17 GRB2 | 0.03 Add | 1.15(0.66-2.01) | 6.14E-01 | 9.41E-01 |
| rs9901434  | 17 GRB2 | 0.03 Add | 1.15(0.66-2.01) | 6.14E-01 | 9.41E-01 |
| rs12945469 | 17 GRB2 | 0.06 Add | 1.18(0.81-1.73) | 3.88E-01 | 9.42E-01 |
| rs4788890  | 17 GRB2 | 0.03 Add | 1.24(0.72-2.13) | 4.44E-01 | 9.52E-01 |
| rs2891713  | 17 GRB2 | 0.03 Add | 1.24(0.72-2.13) | 4.44E-01 | 9.52E-01 |

|            |          |          |                 |          |          |
|------------|----------|----------|-----------------|----------|----------|
| rs7207506  | 17 GRB2  | 0.03 Add | 1.16(0.7-1.92)  | 5.57E-01 | 9.62E-01 |
| rs3744233  | 17 GRB2  | 0.03 Add | 1.17(0.7-1.94)  | 5.55E-01 | 9.65E-01 |
| rs4789193  | 17 GRB2  | 0.03 Add | 1.15(0.7-1.89)  | 5.93E-01 | 9.71E-01 |
| rs4789172  | 17 GRB2  | 0.24 Dom | 0.88(0.69-1.12) | 2.95E-01 | 9.72E-01 |
| rs10914457 | 1 HCRTR1 | 0.14 Rec | 2.77(1.08-7.1)  | 3.43E-02 | 2.85E-01 |
| rs10914453 | 1 HCRTR1 | 0.31 Dom | 0.9(0.71-1.15)  | 4.04E-01 | 6.45E-01 |
| rs10914456 | 1 HCRTR1 | 0.28 Dom | 0.88(0.69-1.13) | 3.21E-01 | 6.89E-01 |
| rs10798880 | 1 HCRTR1 | 0.31 Dom | 0.84(0.66-1.07) | 1.65E-01 | 7.27E-01 |
| rs7546297  | 1 HCRTR1 | 0.31 Dom | 0.84(0.66-1.08) | 1.71E-01 | 7.41E-01 |
| rs10798882 | 1 HCRTR1 | 0.26 Dom | 0.85(0.66-1.08) | 1.75E-01 | 7.47E-01 |
| rs2271933  | 1 HCRTR1 | 0.26 Dom | 0.86(0.68-1.1)  | 2.42E-01 | 7.84E-01 |
| rs871634   | 1 HCRTR1 | 0.30 Dom | 0.86(0.67-1.09) | 2.17E-01 | 8.14E-01 |
| rs6703093  | 1 HCRTR1 | 0.26 Dom | 0.87(0.68-1.11) | 2.70E-01 | 8.25E-01 |
| rs3753614  | 1 HCRTR1 | 0.27 Dom | 0.87(0.68-1.11) | 2.71E-01 | 8.26E-01 |
| rs3753613  | 1 HCRTR1 | 0.27 Dom | 0.87(0.68-1.11) | 2.71E-01 | 8.26E-01 |
| rs10914458 | 1 HCRTR1 | 0.26 Dom | 0.88(0.69-1.12) | 2.84E-01 | 8.35E-01 |
| rs2176807  | 1 HCRTR1 | 0.26 Dom | 0.88(0.69-1.12) | 2.84E-01 | 8.35E-01 |
| rs3753612  | 1 HCRTR1 | 0.28 Dom | 0.86(0.68-1.1)  | 2.34E-01 | 8.35E-01 |
| rs7524405  | 1 HCRTR1 | 0.28 Dom | 0.86(0.68-1.1)  | 2.39E-01 | 8.36E-01 |
| rs968335   | 1 HCRTR1 | 0.26 Dom | 0.88(0.69-1.12) | 2.93E-01 | 8.39E-01 |
| rs12402191 | 1 HCRTR1 | 0.06 Add | 1.13(0.79-1.63) | 5.09E-01 | 8.42E-01 |
| rs4949454  | 1 HCRTR1 | 0.26 Dom | 0.88(0.69-1.12) | 2.92E-01 | 8.43E-01 |
| rs7529064  | 1 HCRTR1 | 0.26 Dom | 0.88(0.69-1.12) | 2.92E-01 | 8.43E-01 |
| rs4074181  | 6 HCRTR2 | 0.18 Rec | 2.12(1.09-4.13) | 2.74E-02 | 8.08E-01 |
| rs9382471  | 6 HCRTR2 | 0.18 Rec | 2.02(1.05-3.88) | 3.44E-02 | 8.68E-01 |
| rs9396069  | 6 HCRTR2 | 0.18 Rec | 2.02(1.05-3.88) | 3.44E-02 | 8.68E-01 |
| rs9357851  | 6 HCRTR2 | 0.18 Rec | 2.02(1.05-3.88) | 3.44E-02 | 8.68E-01 |
| rs7771240  | 6 HCRTR2 | 0.18 Rec | 2.02(1.05-3.88) | 3.44E-02 | 8.68E-01 |
| rs9357855  | 6 HCRTR2 | 0.18 Rec | 2.02(1.05-3.88) | 3.44E-02 | 8.68E-01 |
| rs9349772  | 6 HCRTR2 | 0.18 Rec | 2.02(1.05-3.88) | 3.44E-02 | 8.69E-01 |
| rs9357853  | 6 HCRTR2 | 0.18 Rec | 2.02(1.05-3.88) | 3.44E-02 | 8.69E-01 |
| rs7754675  | 6 HCRTR2 | 0.18 Rec | 2.02(1.05-3.88) | 3.44E-02 | 8.69E-01 |
| rs7741664  | 6 HCRTR2 | 0.18 Rec | 2.02(1.05-3.88) | 3.44E-02 | 8.69E-01 |
| rs9357850  | 6 HCRTR2 | 0.18 Rec | 2.02(1.05-3.88) | 3.44E-02 | 8.69E-01 |

|            |          |          |                 |          |          |
|------------|----------|----------|-----------------|----------|----------|
| rs3134710  | 6 HCRTR2 | 0.23 Add | 1.24(1.01-1.51) | 3.72E-02 | 8.95E-01 |
| rs4142972  | 6 HCRTR2 | 0.30 Add | 0.82(0.68-1)    | 4.73E-02 | 9.00E-01 |
| rs2653346  | 6 HCRTR2 | 0.46 Rec | 1.36(1.02-1.82) | 3.89E-02 | 9.05E-01 |
| rs3122156  | 6 HCRTR2 | 0.23 Add | 1.23(1.01-1.5)  | 4.09E-02 | 9.11E-01 |
| rs3134711  | 6 HCRTR2 | 0.24 Rec | 1.68(1.01-2.79) | 4.67E-02 | 9.32E-01 |
| rs9349774  | 6 HCRTR2 | 0.18 Rec | 1.94(1-3.75)    | 4.84E-02 | 9.35E-01 |
| rs9367626  | 6 HCRTR2 | 0.18 Rec | 1.94(1-3.75)    | 4.84E-02 | 9.35E-01 |
| rs9349771  | 6 HCRTR2 | 0.18 Rec | 1.94(1-3.75)    | 4.84E-02 | 9.35E-01 |
| rs1910123  | 6 HCRTR2 | 0.22 Dom | 0.79(0.61-1.01) | 5.85E-02 | 9.62E-01 |
| rs3122155  | 6 HCRTR2 | 0.44 Dom | 1.03(0.8-1.34)  | 8.12E-01 | 9.64E-01 |
| rs1542896  | 6 HCRTR2 | 0.22 Dom | 0.79(0.61-1.01) | 6.08E-02 | 9.66E-01 |
| rs12191932 | 6 HCRTR2 | 0.22 Dom | 0.79(0.61-1.01) | 6.08E-02 | 9.66E-01 |
| rs2292041  | 6 HCRTR2 | 0.22 Dom | 0.79(0.61-1.01) | 6.08E-02 | 9.66E-01 |
| rs10456702 | 6 HCRTR2 | 0.22 Dom | 0.79(0.61-1.01) | 6.08E-02 | 9.66E-01 |
| rs3122163  | 6 HCRTR2 | 0.06 Dom | 1.36(0.94-1.97) | 1.05E-01 | 9.66E-01 |
| rs3122167  | 6 HCRTR2 | 0.29 Rec | 1.53(0.98-2.38) | 6.04E-02 | 9.67E-01 |
| rs9396063  | 6 HCRTR2 | 0.18 Rec | 1.82(0.95-3.48) | 6.99E-02 | 9.78E-01 |
| rs9367624  | 6 HCRTR2 | 0.18 Rec | 1.82(0.95-3.48) | 6.99E-02 | 9.78E-01 |
| rs4311512  | 6 HCRTR2 | 0.18 Rec | 1.82(0.95-3.48) | 6.99E-02 | 9.78E-01 |
| rs9357849  | 6 HCRTR2 | 0.18 Rec | 1.82(0.95-3.48) | 6.99E-02 | 9.78E-01 |
| rs9349768  | 6 HCRTR2 | 0.18 Rec | 1.82(0.95-3.48) | 6.99E-02 | 9.78E-01 |
| rs9396062  | 6 HCRTR2 | 0.18 Rec | 1.82(0.95-3.48) | 6.99E-02 | 9.78E-01 |
| rs4530845  | 6 HCRTR2 | 0.18 Rec | 1.82(0.95-3.48) | 6.99E-02 | 9.78E-01 |
| rs9382465  | 6 HCRTR2 | 0.18 Rec | 1.82(0.95-3.48) | 6.99E-02 | 9.78E-01 |
| rs3122160  | 6 HCRTR2 | 0.19 Add | 1.19(0.96-1.48) | 1.12E-01 | 9.79E-01 |
| rs11751491 | 6 HCRTR2 | 0.06 Dom | 1.34(0.92-1.94) | 1.26E-01 | 9.80E-01 |
| rs9382464  | 6 HCRTR2 | 0.24 Add | 1.2(0.98-1.46)  | 7.19E-02 | 9.81E-01 |
| rs12660136 | 6 HCRTR2 | 0.50 Add | 0.85(0.71-1.01) | 7.22E-02 | 9.81E-01 |
| rs4496804  | 6 HCRTR2 | 0.18 Rec | 1.76(0.93-3.36) | 8.36E-02 | 9.88E-01 |
| rs4311511  | 6 HCRTR2 | 0.19 Rec | 1.74(0.92-3.29) | 9.08E-02 | 9.91E-01 |
| rs4631286  | 6 HCRTR2 | 0.19 Rec | 1.74(0.92-3.29) | 9.08E-02 | 9.91E-01 |
| rs3122169  | 6 HCRTR2 | 0.47 Rec | 1.26(0.95-1.67) | 1.07E-01 | 9.96E-01 |
| rs3122162  | 6 HCRTR2 | 0.29 Rec | 1.43(0.93-2.2)  | 1.08E-01 | 9.96E-01 |
| rs3122153  | 6 HCRTR2 | 0.28 Dom | 1.15(0.9-1.46)  | 2.54E-01 | 9.98E-01 |

|            |          |          |                 |          |          |
|------------|----------|----------|-----------------|----------|----------|
| rs12662510 | 6 HCRTR2 | 0.27 Dom | 1.15(0.9-1.46)  | 2.63E-01 | 9.98E-01 |
| rs13198993 | 6 HCRTR2 | 0.03 Add | 1.35(0.82-2.22) | 2.34E-01 | 9.98E-01 |
| rs13200042 | 6 HCRTR2 | 0.03 Add | 1.35(0.82-2.22) | 2.34E-01 | 9.98E-01 |
| rs4609033  | 6 HCRTR2 | 0.03 Add | 1.35(0.82-2.22) | 2.34E-01 | 9.98E-01 |
| rs9396060  | 6 HCRTR2 | 0.27 Dom | 1.15(0.9-1.46)  | 2.57E-01 | 9.98E-01 |
| rs9475214  | 6 HCRTR2 | 0.21 Rec | 1.56(0.89-2.74) | 1.22E-01 | 9.98E-01 |
| rs12527963 | 6 HCRTR2 | 0.19 Add | 1.19(0.95-1.49) | 1.28E-01 | 9.98E-01 |
| rs6922310  | 6 HCRTR2 | 0.28 Dom | 1.15(0.91-1.47) | 2.42E-01 | 9.98E-01 |
| rs3134708  | 6 HCRTR2 | 0.28 Dom | 1.15(0.91-1.47) | 2.42E-01 | 9.98E-01 |
| rs3122164  | 6 HCRTR2 | 0.24 Rec | 1.46(0.89-2.38) | 1.36E-01 | 9.98E-01 |
| rs9464203  | 6 HCRTR2 | 0.03 Add | 1.35(0.81-2.24) | 2.50E-01 | 9.98E-01 |
| rs12111375 | 6 HCRTR2 | 0.01 Add | 0.58(0.22-1.5)  | 2.60E-01 | 9.98E-01 |
| rs4467775  | 6 HCRTR2 | 0.30 Add | 0.87(0.72-1.06) | 1.77E-01 | 9.99E-01 |
| rs7775745  | 6 HCRTR2 | 0.25 Dom | 0.97(0.76-1.24) | 8.09E-01 | 9.99E-01 |
| rs9382460  | 6 HCRTR2 | 0.30 Add | 0.88(0.72-1.07) | 1.94E-01 | 9.99E-01 |
| rs1553332  | 6 HCRTR2 | 0.32 Add | 0.89(0.75-1.06) | 2.03E-01 | 9.99E-01 |
| rs9382467  | 6 HCRTR2 | 0.29 Dom | 0.84(0.66-1.07) | 1.53E-01 | 9.99E-01 |
| rs2811239  | 6 HCRTR2 | 0.42 Dom | 0.86(0.66-1.1)  | 2.28E-01 | 9.99E-01 |
| rs2653355  | 6 HCRTR2 | 0.12 Dom | 1.23(0.92-1.65) | 1.56E-01 | 9.99E-01 |
| rs3134707  | 6 HCRTR2 | 0.03 Add | 1.33(0.78-2.28) | 2.95E-01 | 9.99E-01 |
| rs3122154  | 6 HCRTR2 | 0.03 Add | 1.33(0.78-2.28) | 2.95E-01 | 9.99E-01 |
| rs7452651  | 6 HCRTR2 | 0.16 Rec | 1.68(0.81-3.48) | 1.63E-01 | 9.99E-01 |
| rs4712099  | 6 HCRTR2 | 0.30 Add | 0.89(0.73-1.08) | 2.24E-01 | 9.99E-01 |
| rs9396056  | 6 HCRTR2 | 0.16 Add | 0.86(0.69-1.08) | 2.06E-01 | 1.00E+00 |
| rs12663056 | 6 HCRTR2 | 0.25 Dom | 1.03(0.81-1.32) | 8.02E-01 | 1.00E+00 |
| rs10456181 | 6 HCRTR2 | 0.16 Add | 0.88(0.7-1.1)   | 2.62E-01 | 1.00E+00 |
| rs10456182 | 6 HCRTR2 | 0.16 Dom | 0.86(0.66-1.13) | 2.81E-01 | 1.00E+00 |
| rs9367630  | 6 HCRTR2 | 0.27 Rec | 1.28(0.82-2.02) | 2.77E-01 | 1.00E+00 |
| rs7738215  | 6 HCRTR2 | 0.38 Rec | 1.01(0.71-1.43) | 9.58E-01 | 1.00E+00 |
| rs2134294  | 6 HCRTR2 | 0.37 Add | 0.91(0.77-1.08) | 3.00E-01 | 1.00E+00 |
| rs3800539  | 6 HCRTR2 | 0.28 Dom | 1.04(0.82-1.33) | 7.41E-01 | 1.00E+00 |
| rs9367629  | 6 HCRTR2 | 0.28 Dom | 1.04(0.82-1.33) | 7.41E-01 | 1.00E+00 |
| rs2653351  | 6 HCRTR2 | 0.40 Add | 1.09(0.91-1.29) | 3.58E-01 | 1.00E+00 |
| rs2653350  | 6 HCRTR2 | 0.40 Add | 1.09(0.91-1.29) | 3.58E-01 | 1.00E+00 |

|            |          |          |                 |          |          |
|------------|----------|----------|-----------------|----------|----------|
| rs4364482  | 6 HCRTR2 | 0.45 Dom | 1.09(0.84-1.42) | 5.26E-01 | 1.00E+00 |
| rs3122149  | 6 HCRTR2 | 0.29 Rec | 1.13(0.74-1.73) | 5.58E-01 | 1.00E+00 |
| rs13343017 | 6 HCRTR2 | 0.29 Rec | 1.13(0.74-1.73) | 5.58E-01 | 1.00E+00 |
| rs2292040  | 6 HCRTR2 | 0.27 Rec | 1.26(0.8-1.98)  | 3.25E-01 | 1.00E+00 |
| rs2653342  | 6 HCRTR2 | 0.06 Dom | 1.13(0.77-1.65) | 5.28E-01 | 1.00E+00 |
| rs10498802 | 6 HCRTR2 | 0.28 Rec | 1.02(0.65-1.62) | 9.16E-01 | 1.00E+00 |
| rs9370402  | 6 HCRTR2 | 0.02 Add | 0.85(0.47-1.53) | 5.91E-01 | 1.00E+00 |
| rs9367622  | 6 HCRTR2 | 0.28 Dom | 1.07(0.84-1.36) | 5.80E-01 | 1.00E+00 |
| rs3122151  | 6 HCRTR2 | 0.25 Dom | 1.06(0.83-1.36) | 6.13E-01 | 1.00E+00 |
| rs4236127  | 6 HCRTR2 | 0.25 Dom | 1.06(0.83-1.36) | 6.13E-01 | 1.00E+00 |
| rs2811228  | 6 HCRTR2 | 0.50 Rec | 0.93(0.7-1.23)  | 6.14E-01 | 1.00E+00 |
| rs2653354  | 6 HCRTR2 | 0.50 Add | 0.94(0.79-1.11) | 4.73E-01 | 1.00E+00 |
| rs2653352  | 6 HCRTR2 | 0.50 Add | 0.94(0.79-1.11) | 4.73E-01 | 1.00E+00 |
| rs2653353  | 6 HCRTR2 | 0.50 Add | 0.94(0.79-1.11) | 4.73E-01 | 1.00E+00 |
| rs9370403  | 6 HCRTR2 | 0.40 Dom | 1.05(0.82-1.36) | 6.96E-01 | 1.00E+00 |
| rs3134689  | 6 HCRTR2 | 0.25 Rec | 1.11(0.69-1.78) | 6.61E-01 | 1.00E+00 |
| rs3006854  | 6 HCRTR2 | 0.25 Rec | 1.11(0.69-1.78) | 6.61E-01 | 1.00E+00 |
| rs12526414 | 6 HCRTR2 | 0.25 Dom | 1.06(0.83-1.35) | 6.63E-01 | 1.00E+00 |
| rs3134701  | 6 HCRTR2 | 0.25 Rec | 1.05(0.66-1.67) | 8.33E-01 | 1.00E+00 |
| rs3134699  | 6 HCRTR2 | 0.25 Rec | 1.05(0.66-1.67) | 8.33E-01 | 1.00E+00 |
| rs10948894 | 6 HCRTR2 | 0.25 Rec | 1.05(0.66-1.67) | 8.33E-01 | 1.00E+00 |
| rs9475195  | 6 HCRTR2 | 0.38 Add | 0.99(0.83-1.18) | 8.99E-01 | 1.00E+00 |
| rs2653343  | 6 HCRTR2 | 0.06 Dom | 1.1(0.75-1.62)  | 6.29E-01 | 1.00E+00 |
| rs4431422  | 6 HCRTR2 | 0.20 Dom | 0.91(0.71-1.18) | 4.86E-01 | 1.00E+00 |
| rs7771743  | 6 HCRTR2 | 0.20 Dom | 0.91(0.71-1.18) | 4.86E-01 | 1.00E+00 |
| rs3134696  | 6 HCRTR2 | 0.25 Dom | 1.05(0.82-1.34) | 7.08E-01 | 1.00E+00 |
| rs2653349  | 6 HCRTR2 | 0.06 Dom | 1.09(0.74-1.6)  | 6.66E-01 | 1.00E+00 |
| rs2653359  | 6 HCRTR2 | 0.50 Rec | 0.94(0.71-1.25) | 6.80E-01 | 1.00E+00 |
| rs2811233  | 6 HCRTR2 | 0.50 Rec | 0.94(0.71-1.25) | 6.80E-01 | 1.00E+00 |
| rs2811232  | 6 HCRTR2 | 0.50 Rec | 0.94(0.71-1.25) | 6.80E-01 | 1.00E+00 |
| rs2653357  | 6 HCRTR2 | 0.50 Rec | 0.94(0.71-1.25) | 6.80E-01 | 1.00E+00 |
| rs2811231  | 6 HCRTR2 | 0.50 Rec | 0.94(0.71-1.25) | 6.80E-01 | 1.00E+00 |
| rs9367621  | 6 HCRTR2 | 0.35 Dom | 0.93(0.73-1.19) | 5.85E-01 | 1.00E+00 |
| rs3134705  | 6 HCRTR2 | 0.41 Dom | 1.06(0.82-1.36) | 6.77E-01 | 1.00E+00 |

|            |          |          |                 |          |          |
|------------|----------|----------|-----------------|----------|----------|
| rs7758861  | 6 HCRTR2 | 0.03 Add | 1.1(0.67-1.79)  | 7.15E-01 | 1.00E+00 |
| rs7756097  | 6 HCRTR2 | 0.19 Rec | 0.89(0.49-1.61) | 7.03E-01 | 1.00E+00 |
| rs9357845  | 6 HCRTR2 | 0.19 Rec | 0.89(0.49-1.61) | 7.03E-01 | 1.00E+00 |
| rs2653348  | 6 HCRTR2 | 0.34 Rec | 0.97(0.66-1.42) | 8.76E-01 | 1.00E+00 |
| rs7768760  | 6 HCRTR2 | 0.45 Dom | 1.08(0.83-1.41) | 5.78E-01 | 1.00E+00 |
| rs6937878  | 6 HCRTR2 | 0.25 Rec | 1.07(0.67-1.71) | 7.72E-01 | 1.00E+00 |
| rs6937705  | 6 HCRTR2 | 0.25 Rec | 1.07(0.67-1.71) | 7.72E-01 | 1.00E+00 |
| rs10498801 | 6 HCRTR2 | 0.25 Rec | 1.07(0.67-1.71) | 7.72E-01 | 1.00E+00 |
| rs6927478  | 6 HCRTR2 | 0.23 Rec | 1.18(0.71-1.94) | 5.30E-01 | 1.00E+00 |
| rs3134704  | 6 HCRTR2 | 0.41 Add | 1.04(0.88-1.24) | 6.38E-01 | 1.00E+00 |
| rs3122148  | 6 HCRTR2 | 0.26 Rec | 1.06(0.67-1.69) | 7.92E-01 | 1.00E+00 |
| rs6929450  | 6 HCRTR2 | 0.45 Dom | 1.09(0.83-1.42) | 5.29E-01 | 1.00E+00 |
| rs9370399  | 6 HCRTR2 | 0.46 Dom | 1.09(0.84-1.43) | 5.15E-01 | 1.00E+00 |
| rs7767642  | 6 HCRTR2 | 0.19 Add | 0.94(0.76-1.16) | 5.59E-01 | 1.00E+00 |
| rs2653347  | 6 HCRTR2 | 0.06 Dom | 1.06(0.72-1.56) | 7.63E-01 | 1.00E+00 |
| rs6929837  | 6 HCRTR2 | 0.06 Dom | 1.06(0.72-1.56) | 7.63E-01 | 1.00E+00 |
| rs2653344  | 6 HCRTR2 | 0.06 Dom | 1.06(0.72-1.56) | 7.63E-01 | 1.00E+00 |
| rs6295     | 5 HTR1A  | 0.26 Dom | 1.05(0.83-1.34) | 6.79E-01 | 8.96E-01 |
| rs1549274  | 5 HTR1A  | 0.21 Rec | 1.12(0.63-1.99) | 6.97E-01 | 9.06E-01 |
| rs1423691  | 5 HTR1A  | 0.21 Rec | 1.12(0.63-1.99) | 6.97E-01 | 9.06E-01 |
| rs6859392  | 5 HTR1A  | 0.21 Rec | 1.12(0.63-1.99) | 6.97E-01 | 9.06E-01 |
| rs2161615  | 5 HTR1A  | 0.21 Rec | 1.12(0.63-1.99) | 6.97E-01 | 9.06E-01 |
| rs878567   | 5 HTR1A  | 0.21 Rec | 1.12(0.63-1.99) | 6.97E-01 | 9.06E-01 |
| rs12653018 | 5 HTR1A  | 0.21 Rec | 1.12(0.63-1.99) | 6.97E-01 | 9.06E-01 |
| rs6449693  | 5 HTR1A  | 0.21 Rec | 1.12(0.63-1.99) | 6.97E-01 | 9.06E-01 |
| rs10085024 | 5 HTR1A  | 0.21 Rec | 1.12(0.63-1.99) | 6.97E-01 | 9.06E-01 |
| rs10042486 | 5 HTR1A  | 0.21 Rec | 1.12(0.63-1.99) | 6.97E-01 | 9.06E-01 |
| rs4521432  | 5 HTR1A  | 0.21 Rec | 1.12(0.63-1.99) | 6.97E-01 | 9.06E-01 |
| rs6878612  | 5 HTR1A  | 0.21 Rec | 1.12(0.63-1.99) | 6.97E-01 | 9.06E-01 |
| rs1364043  | 5 HTR1A  | 0.41 Add | 0.94(0.79-1.12) | 4.89E-01 | 9.27E-01 |
| rs13361335 | 5 HTR1A  | 0.41 Add | 0.94(0.79-1.12) | 4.89E-01 | 9.27E-01 |
| rs13436914 | 5 HTR1A  | 0.04 Add | 0.87(0.57-1.34) | 5.42E-01 | 9.52E-01 |
| rs6908090  | 6 HTR1B  | 0.06 Add | 1.01(0.7-1.44)  | 9.77E-01 | 9.77E-01 |
| rs9352483  | 6 HTR1B  | 0.06 Add | 1.01(0.7-1.44)  | 9.77E-01 | 9.77E-01 |



|            |         |          |                 |          |          |
|------------|---------|----------|-----------------|----------|----------|
| rs1213366  | 6 HTR1B | 0.13 Rec | 0.49(0.18-1.3)  | 1.50E-01 | 9.94E-01 |
| rs1213373  | 6 HTR1B | 0.13 Rec | 0.49(0.18-1.3)  | 1.50E-01 | 9.94E-01 |
| rs1213371  | 6 HTR1B | 0.13 Rec | 0.49(0.18-1.3)  | 1.50E-01 | 9.94E-01 |
| rs1343485  | 6 HTR1B | 0.06 Add | 1.02(0.72-1.46) | 8.98E-01 | 9.96E-01 |
| rs9361235  | 6 HTR1B | 0.13 Rec | 0.51(0.19-1.36) | 1.80E-01 | 9.98E-01 |
| rs17273700 | 6 HTR1B | 0.13 Rec | 0.51(0.19-1.36) | 1.80E-01 | 9.98E-01 |
| rs9361233  | 6 HTR1B | 0.13 Rec | 0.51(0.19-1.36) | 1.80E-01 | 9.98E-01 |
| rs11568817 | 6 HTR1B | 0.13 Rec | 0.51(0.19-1.36) | 1.80E-01 | 9.98E-01 |
| rs10943458 | 6 HTR1B | 0.10 Add | 1.16(0.87-1.55) | 3.14E-01 | 9.98E-01 |
| rs2211488  | 6 HTR1B | 0.10 Add | 1.16(0.87-1.55) | 3.14E-01 | 9.98E-01 |
| rs12203487 | 6 HTR1B | 0.10 Add | 1.16(0.87-1.55) | 3.14E-01 | 9.98E-01 |
| rs1213369  | 6 HTR1B | 0.24 Rec | 0.69(0.4-1.19)  | 1.83E-01 | 9.99E-01 |
| rs12527143 | 6 HTR1B | 0.10 Add | 1.15(0.86-1.54) | 3.33E-01 | 9.99E-01 |
| rs4543330  | 6 HTR1B | 0.03 Dom | 0.96(0.59-1.58) | 8.80E-01 | 1.00E+00 |
| rs1213365  | 6 HTR1B | 0.27 Rec | 0.83(0.53-1.29) | 4.14E-01 | 1.00E+00 |
| rs1213370  | 6 HTR1B | 0.27 Add | 0.92(0.76-1.1)  | 3.61E-01 | 1.00E+00 |
| rs130058   | 6 HTR1B | 0.09 Add | 0.89(0.66-1.18) | 4.10E-01 | 1.00E+00 |
| rs13212041 | 6 HTR1B | 0.23 Add | 1.09(0.89-1.34) | 3.99E-01 | 1.00E+00 |
| rs2798949  | 6 HTR1B | 0.10 Rec | 0.8(0.23-2.79)  | 7.25E-01 | 1.00E+00 |
| rs13218546 | 6 HTR1B | 0.14 Add | 0.91(0.71-1.16) | 4.40E-01 | 1.00E+00 |
| rs10806098 | 6 HTR1B | 0.49 Dom | 0.87(0.66-1.14) | 3.12E-01 | 1.00E+00 |
| rs13192352 | 6 HTR1B | 0.49 Dom | 0.89(0.68-1.17) | 4.17E-01 | 1.00E+00 |
| rs6298     | 6 HTR1B | 0.49 Dom | 0.89(0.68-1.17) | 4.17E-01 | 1.00E+00 |
| rs1213368  | 6 HTR1B | 0.38 Rec | 0.84(0.6-1.19)  | 3.39E-01 | 1.00E+00 |
| rs1228814  | 6 HTR1B | 0.19 Rec | 1.03(0.53-2.02) | 9.22E-01 | 1.00E+00 |
| rs1778258  | 6 HTR1B | 0.11 Add | 1.09(0.83-1.44) | 5.20E-01 | 1.00E+00 |
| rs12173930 | 6 HTR1B | 0.13 Rec | 1.14(0.45-2.91) | 7.79E-01 | 1.00E+00 |
| rs6296     | 6 HTR1B | 0.49 Dom | 0.91(0.69-1.2)  | 4.96E-01 | 1.00E+00 |
| rs1343491  | 6 HTR1B | 0.14 Add | 0.93(0.73-1.18) | 5.45E-01 | 1.00E+00 |
| rs9352481  | 6 HTR1B | 0.46 Add | 0.99(0.84-1.17) | 9.08E-01 | 1.00E+00 |
| rs12662392 | 6 HTR1B | 0.50 Rec | 1.09(0.83-1.44) | 5.30E-01 | 1.00E+00 |
| rs9350712  | 6 HTR1B | 0.46 Add | 0.99(0.84-1.17) | 9.14E-01 | 1.00E+00 |
| rs9359271  | 6 HTR1B | 0.48 Rec | 0.93(0.7-1.23)  | 6.11E-01 | 1.00E+00 |
| rs2226183  | 6 HTR1B | 0.03 Dom | 1.04(0.65-1.69) | 8.59E-01 | 1.00E+00 |

|            |          |          |                 |          |          |
|------------|----------|----------|-----------------|----------|----------|
| rs4140535  | 6 HTR1B  | 0.35 Rec | 1.08(0.74-1.56) | 6.94E-01 | 1.00E+00 |
| rs2143823  | 6 HTR1B  | 0.22 Dom | 0.92(0.72-1.18) | 5.21E-01 | 1.00E+00 |
| rs6297     | 6 HTR1B  | 0.11 Rec | 1.43(0.49-4.17) | 5.11E-01 | 1.00E+00 |
| rs1936158  | 6 HTR1B  | 0.28 Rec | 0.85(0.54-1.35) | 5.01E-01 | 1.00E+00 |
| rs2000292  | 6 HTR1B  | 0.49 Rec | 1.06(0.8-1.41)  | 6.79E-01 | 1.00E+00 |
| rs1145831  | 6 HTR1B  | 0.15 Rec | 0.78(0.37-1.62) | 5.01E-01 | 1.00E+00 |
| rs1131891  | 1 KCNJ9  | 0.05 Dom | 0.92(0.61-1.38) | 6.75E-01 | 7.22E-01 |
| rs12402888 | 1 KCNJ9  | 0.05 Dom | 0.92(0.61-1.38) | 6.75E-01 | 7.22E-01 |
| rs3747619  | 1 KCNJ9  | 0.05 Dom | 0.92(0.61-1.38) | 6.75E-01 | 7.22E-01 |
| rs4656876  | 1 KCNJ9  | 0.26 Add | 1.16(0.95-1.42) | 1.39E-01 | 7.69E-01 |
| rs6677510  | 1 KCNJ9  | 0.26 Dom | 1.21(0.95-1.54) | 1.25E-01 | 7.83E-01 |
| rs1321649  | 1 KCNJ9  | 0.26 Dom | 1.21(0.95-1.54) | 1.25E-01 | 7.83E-01 |
| rs1186675  | 1 KCNJ9  | 0.05 Add | 1.24(0.84-1.84) | 2.71E-01 | 8.42E-01 |
| rs12408242 | 1 KCNJ9  | 0.22 Dom | 0.85(0.66-1.09) | 2.04E-01 | 8.58E-01 |
| rs2295621  | 1 KCNJ9  | 0.22 Dom | 0.85(0.66-1.09) | 2.04E-01 | 8.58E-01 |
| rs2753268  | 1 KCNJ9  | 0.27 Dom | 1.17(0.92-1.48) | 2.09E-01 | 8.60E-01 |
| rs11265318 | 1 KCNJ9  | 0.27 Dom | 1.18(0.93-1.5)  | 1.79E-01 | 8.60E-01 |
| rs2494211  | 1 KCNJ9  | 0.27 Dom | 1.18(0.92-1.5)  | 1.86E-01 | 8.70E-01 |
| rs4656874  | 1 KCNJ9  | 0.21 Add | 1.12(0.91-1.39) | 2.95E-01 | 8.77E-01 |
| rs2737703  | 1 KCNJ9  | 0.27 Dom | 1.17(0.92-1.49) | 1.91E-01 | 8.78E-01 |
| rs2369406  | 1 KCNJ9  | 0.49 Rec | 0.91(0.68-1.21) | 5.11E-01 | 8.86E-01 |
| rs3180694  | 1 KCNJ9  | 0.05 Dom | 0.89(0.58-1.36) | 5.97E-01 | 8.99E-01 |
| rs11265320 | 1 KCNJ9  | 0.31 Dom | 1.13(0.88-1.43) | 3.39E-01 | 9.22E-01 |
| rs12401728 | 1 KCNJ9  | 0.22 Dom | 0.88(0.69-1.13) | 3.06E-01 | 9.42E-01 |
| rs4807152  | 19 KLF16 | 0.43 Add | 1.13(0.95-1.34) | 1.83E-01 | 6.89E-01 |
| rs12460105 | 19 KLF16 | 0.43 Add | 1.13(0.95-1.34) | 1.83E-01 | 6.89E-01 |
| rs1609761  | 19 KLF16 | 0.43 Add | 1.13(0.95-1.34) | 1.76E-01 | 7.92E-01 |
| rs1609760  | 19 KLF16 | 0.24 Rec | 1.4(0.82-2.39)  | 2.18E-01 | 8.23E-01 |
| rs4806815  | 19 KLF16 | 0.29 Dom | 0.98(0.77-1.24) | 8.41E-01 | 8.59E-01 |
| rs893539   | 19 KLF16 | 0.24 Rec | 1.37(0.8-2.36)  | 2.52E-01 | 8.62E-01 |
| rs893540   | 19 KLF16 | 0.24 Rec | 1.37(0.8-2.36)  | 2.52E-01 | 8.62E-01 |
| rs3810417  | 19 KLF16 | 0.29 Dom | 0.99(0.78-1.26) | 9.13E-01 | 9.13E-01 |
| rs10401329 | 19 KLF16 | 0.29 Add | 1.04(0.86-1.26) | 6.92E-01 | 9.50E-01 |
| rs4806814  | 19 KLF16 | 0.29 Dom | 0.97(0.76-1.23) | 7.96E-01 | 9.85E-01 |

|            |    |           |      |     |                 |          |          |
|------------|----|-----------|------|-----|-----------------|----------|----------|
| rs893541   | 19 | KLF16     | 0.33 | Dom | 0.95(0.75-1.21) | 6.80E-01 | 9.86E-01 |
| rs4807154  | 19 | KLF16     | 0.32 | Dom | 0.95(0.74-1.21) | 6.63E-01 | 9.88E-01 |
| rs5952799  | X  | MAOA_MAOB | 0.15 | Dom | 0.79(0.56-1.1)  | 1.65E-01 | 7.92E-01 |
| rs736944   | X  | MAOA_MAOB | 0.16 | Dom | 0.79(0.56-1.09) | 1.53E-01 | 7.94E-01 |
| rs5905613  | X  | MAOA_MAOB | 0.49 | Rec | 1.19(0.93-1.51) | 1.58E-01 | 7.99E-01 |
| rs4824562  | X  | MAOA_MAOB | 0.15 | Dom | 0.79(0.56-1.12) | 1.87E-01 | 8.29E-01 |
| rs5905512  | X  | MAOA_MAOB | 0.28 | Dom | 0.84(0.64-1.09) | 1.91E-01 | 8.33E-01 |
| rs1799836  | X  | MAOA_MAOB | 0.19 | Dom | 0.84(0.62-1.14) | 2.59E-01 | 9.08E-01 |
| rs5952813  | X  | MAOA_MAOB | 0.11 | Dom | 0.82(0.55-1.21) | 3.09E-01 | 9.22E-01 |
| rs5952330  | X  | MAOA_MAOB | 0.11 | Dom | 0.82(0.55-1.21) | 3.18E-01 | 9.29E-01 |
| rs17146716 | X  | MAOA_MAOB | 0.11 | Dom | 0.84(0.57-1.24) | 3.81E-01 | 9.65E-01 |
| rs17310637 | X  | MAOA_MAOB | 0.10 | Dom | 0.85(0.57-1.26) | 4.18E-01 | 9.78E-01 |
| rs2283725  | X  | MAOA_MAOB | 0.41 | Dom | 0.95(0.75-1.22) | 7.12E-01 | 9.83E-01 |
| rs1465108  | X  | MAOA_MAOB | 0.40 | Dom | 0.96(0.75-1.22) | 7.15E-01 | 9.84E-01 |
| rs6651806  | X  | MAOA_MAOB | 0.13 | Dom | 0.88(0.62-1.25) | 4.65E-01 | 9.85E-01 |
| rs3027431  | X  | MAOA_MAOB | 0.16 | Dom | 0.89(0.64-1.24) | 4.81E-01 | 9.85E-01 |
| rs7888450  | X  | MAOA_MAOB | 0.10 | Dom | 0.86(0.57-1.28) | 4.49E-01 | 9.86E-01 |
| rs6609257  | X  | MAOA_MAOB | 0.39 | Dom | 0.91(0.71-1.17) | 4.59E-01 | 9.87E-01 |
| rs3788862  | X  | MAOA_MAOB | 0.41 | Dom | 0.96(0.76-1.23) | 7.71E-01 | 9.87E-01 |
| rs5906883  | X  | MAOA_MAOB | 0.41 | Dom | 0.96(0.75-1.23) | 7.68E-01 | 9.87E-01 |
| rs5906957  | X  | MAOA_MAOB | 0.41 | Dom | 0.97(0.76-1.23) | 7.78E-01 | 9.88E-01 |
| rs909525   | X  | MAOA_MAOB | 0.41 | Dom | 0.97(0.76-1.23) | 7.78E-01 | 9.88E-01 |
| rs4824657  | X  | MAOA_MAOB | 0.43 | Rec | 1.03(0.8-1.34)  | 8.14E-01 | 9.88E-01 |
| rs3027421  | X  | MAOA_MAOB | 0.17 | Dom | 0.95(0.69-1.3)  | 7.40E-01 | 9.88E-01 |
| rs1040398  | X  | MAOA_MAOB | 0.16 | Dom | 0.89(0.64-1.25) | 5.03E-01 | 9.90E-01 |
| rs5952352  | X  | MAOA_MAOB | 0.10 | Dom | 0.88(0.59-1.31) | 5.24E-01 | 9.92E-01 |
| rs12558036 | X  | MAOA_MAOB | 0.16 | Dom | 0.9(0.65-1.26)  | 5.52E-01 | 9.92E-01 |
| rs10521432 | X  | MAOA_MAOB | 0.13 | Dom | 0.93(0.65-1.33) | 6.97E-01 | 9.94E-01 |
| rs2064070  | X  | MAOA_MAOB | 0.42 | Dom | 0.93(0.73-1.19) | 5.73E-01 | 9.94E-01 |
| rs2205718  | X  | MAOA_MAOB | 0.42 | Dom | 0.94(0.74-1.2)  | 6.17E-01 | 9.94E-01 |
| rs3027415  | X  | MAOA_MAOB | 0.03 | Dom | 1.17(0.6-2.29)  | 6.38E-01 | 9.95E-01 |
| rs5905449  | X  | MAOA_MAOB | 0.03 | Dom | 1.17(0.55-2.48) | 6.76E-01 | 9.95E-01 |
| rs979606   | X  | MAOA_MAOB | 0.42 | Dom | 0.94(0.74-1.2)  | 6.31E-01 | 9.96E-01 |
| rs2072743  | X  | MAOA_MAOB | 0.42 | Dom | 0.94(0.74-1.2)  | 6.43E-01 | 9.96E-01 |

|            |    |           |      |     |                 |          |          |
|------------|----|-----------|------|-----|-----------------|----------|----------|
| rs3027416  | X  | MAOA_MAOB | 0.19 | Rec | 1(0.73-1.37)    | 9.97E-01 | 9.97E-01 |
| rs5755074  | 22 | MAPK1     | 0.14 | Rec | 2.55(1.08-5.98) | 3.18E-02 | 4.67E-01 |
| rs7286558  | 22 | MAPK1     | 0.03 | Add | 1.56(0.92-2.63) | 9.89E-02 | 6.15E-01 |
| rs7285387  | 22 | MAPK1     | 0.03 | Add | 1.56(0.92-2.63) | 9.89E-02 | 6.15E-01 |
| rs1892847  | 22 | MAPK1     | 0.03 | Add | 1.56(0.92-2.63) | 9.89E-02 | 6.15E-01 |
| rs17821423 | 22 | MAPK1     | 0.03 | Add | 1.46(0.87-2.44) | 1.52E-01 | 7.63E-01 |
| rs3729910  | 22 | MAPK1     | 0.03 | Add | 1.46(0.87-2.44) | 1.52E-01 | 7.63E-01 |
| rs13058    | 22 | MAPK1     | 0.03 | Add | 1.46(0.87-2.44) | 1.52E-01 | 7.64E-01 |
| rs5999550  | 22 | MAPK1     | 0.44 | Dom | 1.19(0.91-1.54) | 2.04E-01 | 8.27E-01 |
| rs5749986  | 22 | MAPK1     | 0.44 | Dom | 1.19(0.91-1.54) | 2.04E-01 | 8.27E-01 |
| rs2266967  | 22 | MAPK1     | 0.44 | Add | 1.15(0.97-1.37) | 1.07E-01 | 8.34E-01 |
| rs5749998  | 22 | MAPK1     | 0.44 | Add | 1.15(0.97-1.37) | 1.07E-01 | 8.35E-01 |
| rs9607287  | 22 | MAPK1     | 0.44 | Dom | 1.18(0.91-1.53) | 2.20E-01 | 8.50E-01 |
| rs743409   | 22 | MAPK1     | 0.46 | Dom | 1.23(0.95-1.61) | 1.22E-01 | 8.68E-01 |
| rs9340     | 22 | MAPK1     | 0.19 | Dom | 1.06(0.82-1.37) | 6.38E-01 | 8.70E-01 |
| rs3788332  | 22 | MAPK1     | 0.44 | Dom | 1.16(0.9-1.51)  | 2.59E-01 | 8.93E-01 |
| rs13943    | 22 | MAPK1     | 0.43 | Dom | 1.16(0.89-1.5)  | 2.70E-01 | 9.01E-01 |
| rs6928     | 22 | MAPK1     | 0.43 | Rec | 1.18(0.87-1.6)  | 2.94E-01 | 9.23E-01 |
| rs3810609  | 22 | MAPK1     | 0.43 | Rec | 1.18(0.87-1.6)  | 2.94E-01 | 9.23E-01 |
| rs3810610  | 22 | MAPK1     | 0.43 | Rec | 1.18(0.87-1.6)  | 2.94E-01 | 9.23E-01 |
| rs8136867  | 22 | MAPK1     | 0.43 | Rec | 1.18(0.87-1.6)  | 2.99E-01 | 9.26E-01 |
| rs9607272  | 22 | MAPK1     | 0.09 | Add | 0.9(0.66-1.22)  | 4.90E-01 | 9.27E-01 |
| rs11704205 | 22 | MAPK1     | 0.43 | Dom | 1.14(0.88-1.47) | 3.26E-01 | 9.33E-01 |
| rs2283792  | 22 | MAPK1     | 0.43 | Dom | 1.14(0.88-1.47) | 3.26E-01 | 9.33E-01 |
| rs5755694  | 22 | MAPK1     | 0.43 | Dom | 1.14(0.88-1.47) | 3.25E-01 | 9.33E-01 |
| rs2876981  | 22 | MAPK1     | 0.09 | Add | 0.9(0.67-1.22)  | 5.13E-01 | 9.38E-01 |
| rs9610355  | 22 | MAPK1     | 0.23 | Add | 1.12(0.92-1.37) | 2.70E-01 | 9.38E-01 |
| rs5755099  | 22 | MAPK1     | 0.43 | Dom | 1.13(0.88-1.47) | 3.38E-01 | 9.40E-01 |
| rs7290469  | 22 | MAPK1     | 0.19 | Rec | 1.16(0.59-2.28) | 6.61E-01 | 9.44E-01 |
| rs9610375  | 22 | MAPK1     | 0.21 | Rec | 1.21(0.67-2.18) | 5.23E-01 | 9.44E-01 |
| rs5999521  | 22 | MAPK1     | 0.43 | Dom | 1.13(0.87-1.47) | 3.47E-01 | 9.45E-01 |
| rs1892846  | 22 | MAPK1     | 0.43 | Dom | 1.13(0.87-1.47) | 3.47E-01 | 9.45E-01 |
| rs5999515  | 22 | MAPK1     | 0.43 | Dom | 1.13(0.87-1.47) | 3.47E-01 | 9.45E-01 |
| rs1892848  | 22 | MAPK1     | 0.43 | Dom | 1.13(0.87-1.47) | 3.47E-01 | 9.45E-01 |

|            |          |          |                 |          |          |
|------------|----------|----------|-----------------|----------|----------|
| rs2006893  | 22 MAPK1 | 0.43 Dom | 1.13(0.87-1.47) | 3.47E-01 | 9.45E-01 |
| rs2298432  | 22 MAPK1 | 0.48 Add | 1.1(0.93-1.31)  | 2.52E-01 | 9.48E-01 |
| rs17759568 | 22 MAPK1 | 0.10 Add | 1.15(0.86-1.53) | 3.54E-01 | 9.49E-01 |
| rs11913240 | 22 MAPK1 | 0.10 Add | 1.15(0.86-1.53) | 3.54E-01 | 9.49E-01 |
| rs2283794  | 22 MAPK1 | 0.43 Dom | 1.12(0.87-1.46) | 3.73E-01 | 9.52E-01 |
| rs2266968  | 22 MAPK1 | 0.23 Add | 1.11(0.9-1.36)  | 3.24E-01 | 9.52E-01 |
| rs2298434  | 22 MAPK1 | 0.23 Add | 1.11(0.9-1.36)  | 3.24E-01 | 9.53E-01 |
| rs9610470  | 22 MAPK1 | 0.09 Add | 0.91(0.67-1.24) | 5.64E-01 | 9.57E-01 |
| rs4821263  | 22 MAPK1 | 0.22 Rec | 1.36(0.77-2.41) | 2.90E-01 | 9.65E-01 |
| rs5749939  | 22 MAPK1 | 0.22 Rec | 1.36(0.77-2.41) | 2.90E-01 | 9.65E-01 |
| rs2283795  | 22 MAPK1 | 0.22 Rec | 1.36(0.77-2.41) | 2.90E-01 | 9.65E-01 |
| rs4821401  | 22 MAPK1 | 0.22 Rec | 1.36(0.77-2.41) | 2.90E-01 | 9.65E-01 |
| rs4821367  | 22 MAPK1 | 0.22 Rec | 1.36(0.77-2.41) | 2.90E-01 | 9.65E-01 |
| rs3827303  | 22 MAPK1 | 0.22 Rec | 1.36(0.77-2.41) | 2.90E-01 | 9.65E-01 |
| rs5754968  | 22 MAPK1 | 0.22 Rec | 1.36(0.77-2.41) | 2.90E-01 | 9.65E-01 |
| rs4821371  | 22 MAPK1 | 0.22 Rec | 1.36(0.77-2.41) | 2.90E-01 | 9.65E-01 |
| rs5755040  | 22 MAPK1 | 0.22 Rec | 1.36(0.77-2.41) | 2.90E-01 | 9.65E-01 |
| rs5749811  | 22 MAPK1 | 0.22 Rec | 1.36(0.77-2.41) | 2.90E-01 | 9.65E-01 |
| rs2276005  | 22 MAPK1 | 0.22 Rec | 1.36(0.77-2.41) | 2.90E-01 | 9.65E-01 |
| rs13515    | 22 MAPK1 | 0.22 Rec | 1.36(0.77-2.41) | 2.90E-01 | 9.65E-01 |
| rs2276006  | 22 MAPK1 | 0.22 Rec | 1.36(0.77-2.41) | 2.90E-01 | 9.65E-01 |
| rs5754970  | 22 MAPK1 | 0.22 Rec | 1.36(0.77-2.41) | 2.90E-01 | 9.65E-01 |
| rs9607285  | 22 MAPK1 | 0.19 Add | 1.03(0.82-1.28) | 8.04E-01 | 9.69E-01 |
| rs9610374  | 22 MAPK1 | 0.19 Rec | 0.93(0.45-1.89) | 8.33E-01 | 9.71E-01 |
| rs9607298  | 22 MAPK1 | 0.19 Rec | 0.93(0.45-1.89) | 8.33E-01 | 9.71E-01 |
| rs5999749  | 22 MAPK1 | 0.19 Rec | 0.93(0.45-1.89) | 8.33E-01 | 9.71E-01 |
| rs2266969  | 22 MAPK1 | 0.19 Rec | 0.93(0.45-1.89) | 8.33E-01 | 9.71E-01 |
| rs2283791  | 22 MAPK1 | 0.19 Rec | 0.93(0.45-1.89) | 8.33E-01 | 9.71E-01 |
| rs9610338  | 22 MAPK1 | 0.19 Rec | 0.93(0.45-1.89) | 8.33E-01 | 9.71E-01 |
| rs2266966  | 22 MAPK1 | 0.19 Rec | 0.93(0.45-1.89) | 8.33E-01 | 9.71E-01 |
| rs5999752  | 22 MAPK1 | 0.19 Rec | 0.93(0.45-1.89) | 8.33E-01 | 9.71E-01 |
| rs2283793  | 22 MAPK1 | 0.19 Rec | 0.93(0.45-1.89) | 8.33E-01 | 9.71E-01 |
| rs5755745  | 22 MAPK1 | 0.21 Add | 1.09(0.89-1.35) | 3.97E-01 | 9.72E-01 |
| rs1063311  | 22 MAPK1 | 0.19 Rec | 0.91(0.47-1.76) | 7.84E-01 | 9.80E-01 |

|            |        |          |                 |          |          |
|------------|--------|----------|-----------------|----------|----------|
| rs835637   | 3 NCK1 | 0.09 Add | 0.81(0.6-1.1)   | 1.77E-01 | 6.59E-01 |
| rs835636   | 3 NCK1 | 0.09 Add | 0.82(0.61-1.11) | 1.91E-01 | 6.88E-01 |
| rs9845460  | 3 NCK1 | 0.09 Add | 0.82(0.6-1.12)  | 2.06E-01 | 7.08E-01 |
| rs4678275  | 3 NCK1 | 0.09 Add | 0.82(0.6-1.12)  | 2.06E-01 | 7.08E-01 |
| rs7648198  | 3 NCK1 | 0.09 Add | 0.83(0.61-1.12) | 2.17E-01 | 7.29E-01 |
| rs12629000 | 3 NCK1 | 0.09 Add | 0.83(0.61-1.12) | 2.25E-01 | 7.37E-01 |
| rs16844241 | 3 NCK1 | 0.09 Add | 0.83(0.61-1.12) | 2.25E-01 | 7.37E-01 |
| rs6761993  | 3 NCK1 | 0.13 Dom | 0.83(0.62-1.1)  | 1.85E-01 | 7.85E-01 |
| rs12054219 | 3 NCK1 | 0.31 Add | 0.88(0.73-1.06) | 1.69E-01 | 8.17E-01 |
| rs835632   | 3 NCK1 | 0.31 Add | 0.88(0.73-1.06) | 1.69E-01 | 8.17E-01 |
| rs835634   | 3 NCK1 | 0.31 Add | 0.88(0.73-1.06) | 1.69E-01 | 8.17E-01 |
| rs12054408 | 3 NCK1 | 0.31 Add | 0.88(0.73-1.06) | 1.69E-01 | 8.17E-01 |
| rs2343662  | 3 NCK1 | 0.13 Dom | 0.85(0.64-1.13) | 2.60E-01 | 8.35E-01 |
| rs12054220 | 3 NCK1 | 0.09 Add | 0.88(0.65-1.18) | 3.86E-01 | 8.56E-01 |
| rs9859810  | 3 NCK1 | 0.13 Dom | 0.85(0.64-1.13) | 2.76E-01 | 8.57E-01 |
| rs2117009  | 3 NCK1 | 0.13 Dom | 0.85(0.64-1.13) | 2.76E-01 | 8.57E-01 |
| rs9837990  | 3 NCK1 | 0.13 Dom | 0.85(0.64-1.13) | 2.76E-01 | 8.57E-01 |
| rs9828009  | 3 NCK1 | 0.13 Dom | 0.85(0.64-1.13) | 2.76E-01 | 8.57E-01 |
| rs9818792  | 3 NCK1 | 0.13 Dom | 0.85(0.64-1.13) | 2.75E-01 | 8.58E-01 |
| rs12487901 | 3 NCK1 | 0.13 Dom | 0.85(0.64-1.13) | 2.75E-01 | 8.58E-01 |
| rs835648   | 3 NCK1 | 0.13 Dom | 0.85(0.64-1.13) | 2.73E-01 | 8.61E-01 |
| rs9865545  | 3 NCK1 | 0.13 Dom | 0.86(0.65-1.14) | 2.84E-01 | 8.65E-01 |
| rs9855314  | 3 NCK1 | 0.13 Dom | 0.86(0.65-1.14) | 2.84E-01 | 8.65E-01 |
| rs2031029  | 3 NCK1 | 0.13 Dom | 0.86(0.65-1.14) | 2.84E-01 | 8.65E-01 |
| rs835647   | 3 NCK1 | 0.13 Dom | 0.86(0.65-1.14) | 2.84E-01 | 8.65E-01 |
| rs938525   | 3 NCK1 | 0.13 Dom | 0.86(0.65-1.14) | 2.84E-01 | 8.65E-01 |
| rs6786648  | 3 NCK1 | 0.13 Dom | 0.86(0.65-1.14) | 2.84E-01 | 8.65E-01 |
| rs1433318  | 3 NCK1 | 0.13 Dom | 0.86(0.65-1.14) | 2.84E-01 | 8.65E-01 |
| rs4678448  | 3 NCK1 | 0.13 Dom | 0.86(0.65-1.14) | 2.84E-01 | 8.65E-01 |
| rs1865149  | 3 NCK1 | 0.13 Dom | 0.86(0.65-1.14) | 2.84E-01 | 8.65E-01 |
| rs9836807  | 3 NCK1 | 0.13 Dom | 0.86(0.65-1.14) | 2.84E-01 | 8.65E-01 |
| rs1344790  | 3 NCK1 | 0.13 Dom | 0.86(0.65-1.14) | 2.84E-01 | 8.65E-01 |
| rs6439672  | 3 NCK1 | 0.13 Dom | 0.86(0.65-1.14) | 2.84E-01 | 8.65E-01 |
| rs9848867  | 3 NCK1 | 0.13 Dom | 0.86(0.65-1.14) | 2.84E-01 | 8.65E-01 |

|            |         |          |                 |          |          |
|------------|---------|----------|-----------------|----------|----------|
| rs9827648  | 3 NCK1  | 0.13 Dom | 0.86(0.65-1.14) | 2.84E-01 | 8.65E-01 |
| rs12637949 | 3 NCK1  | 0.13 Dom | 0.86(0.65-1.14) | 2.84E-01 | 8.65E-01 |
| rs9859665  | 3 NCK1  | 0.13 Dom | 0.86(0.65-1.14) | 2.84E-01 | 8.65E-01 |
| rs1052618  | 3 NCK1  | 0.13 Dom | 0.86(0.65-1.14) | 2.84E-01 | 8.65E-01 |
| rs1433319  | 3 NCK1  | 0.13 Dom | 0.86(0.65-1.14) | 2.84E-01 | 8.65E-01 |
| rs6775389  | 3 NCK1  | 0.13 Dom | 0.86(0.65-1.14) | 2.84E-01 | 8.65E-01 |
| rs3963921  | 3 NCK1  | 0.13 Dom | 0.86(0.65-1.14) | 2.84E-01 | 8.65E-01 |
| rs9874887  | 3 NCK1  | 0.13 Dom | 0.86(0.65-1.14) | 2.84E-01 | 8.65E-01 |
| rs12330283 | 3 NCK1  | 0.13 Dom | 0.86(0.65-1.14) | 2.84E-01 | 8.65E-01 |
| rs1965109  | 3 NCK1  | 0.13 Dom | 0.86(0.65-1.14) | 2.84E-01 | 8.65E-01 |
| rs6803618  | 3 NCK1  | 0.13 Dom | 0.86(0.65-1.14) | 2.84E-01 | 8.65E-01 |
| rs9833952  | 3 NCK1  | 0.13 Dom | 0.86(0.65-1.14) | 2.84E-01 | 8.65E-01 |
| rs6771717  | 3 NCK1  | 0.13 Dom | 0.86(0.65-1.14) | 2.84E-01 | 8.65E-01 |
| rs7629882  | 3 NCK1  | 0.13 Dom | 0.86(0.65-1.14) | 2.84E-01 | 8.65E-01 |
| rs6786302  | 3 NCK1  | 0.13 Dom | 0.86(0.65-1.14) | 2.84E-01 | 8.65E-01 |
| rs9846691  | 3 NCK1  | 0.13 Dom | 0.86(0.65-1.14) | 2.84E-01 | 8.65E-01 |
| rs3845925  | 3 NCK1  | 0.13 Dom | 0.86(0.65-1.14) | 2.84E-01 | 8.65E-01 |
| rs7611847  | 3 NCK1  | 0.13 Dom | 0.86(0.65-1.14) | 2.84E-01 | 8.65E-01 |
| rs6797509  | 3 NCK1  | 0.13 Dom | 0.86(0.65-1.14) | 2.84E-01 | 8.65E-01 |
| rs1347209  | 3 NCK1  | 0.13 Dom | 0.86(0.65-1.14) | 2.84E-01 | 8.65E-01 |
| rs1805300  | 3 NCK1  | 0.13 Dom | 0.86(0.65-1.14) | 2.84E-01 | 8.65E-01 |
| rs9878464  | 3 NCK1  | 0.13 Dom | 0.86(0.65-1.14) | 2.84E-01 | 8.65E-01 |
| rs6783508  | 3 NCK1  | 0.13 Dom | 0.86(0.65-1.14) | 2.84E-01 | 8.65E-01 |
| rs9881139  | 3 NCK1  | 0.13 Dom | 0.86(0.65-1.14) | 2.98E-01 | 8.75E-01 |
| rs1048145  | 3 NCK1  | 0.04 Dom | 0.95(0.59-1.51) | 8.14E-01 | 8.77E-01 |
| rs17301365 | 3 NCK1  | 0.04 Dom | 0.95(0.59-1.51) | 8.14E-01 | 8.77E-01 |
| rs3772388  | 3 NCK1  | 0.13 Dom | 0.86(0.65-1.15) | 3.06E-01 | 8.78E-01 |
| rs10935210 | 3 NCK1  | 0.13 Dom | 0.86(0.65-1.15) | 3.06E-01 | 8.78E-01 |
| rs3856623  | 3 NCK1  | 0.13 Dom | 0.86(0.65-1.15) | 3.06E-01 | 8.78E-01 |
| rs7648817  | 3 NCK1  | 0.13 Dom | 0.86(0.65-1.15) | 3.06E-01 | 8.78E-01 |
| rs4678274  | 3 NCK1  | 0.13 Dom | 0.86(0.65-1.15) | 3.06E-01 | 8.78E-01 |
| rs9289523  | 3 NCK1  | 0.13 Dom | 0.86(0.65-1.15) | 3.06E-01 | 8.78E-01 |
| rs9824147  | 3 NCK1  | 0.11 Dom | 0.89(0.65-1.2)  | 4.37E-01 | 9.00E-01 |
| rs3769340  | 2 NR4A2 | 0.14 Dom | 1.29(0.98-1.7)  | 6.62E-02 | 5.98E-01 |

|            |         |          |                 |          |          |
|------------|---------|----------|-----------------|----------|----------|
| rs707130   | 2 NR4A2 | 0.43 Rec | 0.99(0.72-1.34) | 9.26E-01 | 9.26E-01 |
| rs834834   | 2 NR4A2 | 0.43 Rec | 0.99(0.72-1.34) | 9.26E-01 | 9.26E-01 |
| rs834835   | 2 NR4A2 | 0.43 Rec | 0.99(0.72-1.34) | 9.26E-01 | 9.26E-01 |
| rs1150143  | 2 NR4A2 | 0.43 Rec | 0.93(0.69-1.27) | 6.66E-01 | 9.62E-01 |
| rs834829   | 2 NR4A2 | 0.46 Rec | 1.07(0.8-1.44)  | 6.37E-01 | 9.84E-01 |
| rs12803    | 2 NR4A2 | 0.17 Dom | 1.12(0.86-1.46) | 3.90E-01 | 9.94E-01 |
| rs707127   | 2 NR4A2 | 0.32 Rec | 1.17(0.79-1.74) | 4.20E-01 | 9.95E-01 |
| rs13428968 | 2 NR4A2 | 0.26 Dom | 0.9(0.7-1.14)   | 3.77E-01 | 9.95E-01 |
| rs16840214 | 2 NR4A2 | 0.33 Rec | 1.15(0.79-1.68) | 4.63E-01 | 9.96E-01 |
| rs1150144  | 2 NR4A2 | 0.43 Dom | 0.98(0.76-1.26) | 8.49E-01 | 9.96E-01 |
| rs834830   | 2 NR4A2 | 0.47 Rec | 1.09(0.82-1.46) | 5.49E-01 | 9.98E-01 |
| rs1528454  | 2 NR4A2 | 0.33 Dom | 0.93(0.73-1.19) | 5.79E-01 | 9.98E-01 |
| rs16840216 | 2 NR4A2 | 0.33 Dom | 0.93(0.73-1.19) | 5.79E-01 | 9.98E-01 |
| rs10195293 | 2 NR4A2 | 0.33 Dom | 0.93(0.73-1.19) | 5.79E-01 | 9.98E-01 |
| rs12132885 | 1 NTRK1 | 0.03 Add | 1.29(0.78-2.15) | 3.25E-01 | 9.36E-01 |
| rs2986716  | 1 NTRK1 | 0.34 Add | 0.89(0.74-1.06) | 1.93E-01 | 9.40E-01 |
| rs2935228  | 1 NTRK1 | 0.34 Add | 0.89(0.74-1.06) | 1.93E-01 | 9.40E-01 |
| rs2644621  | 1 NTRK1 | 0.34 Add | 0.89(0.74-1.06) | 1.93E-01 | 9.40E-01 |
| rs2644620  | 1 NTRK1 | 0.34 Add | 0.89(0.74-1.06) | 1.93E-01 | 9.40E-01 |
| rs6334     | 1 NTRK1 | 0.33 Rec | 0.75(0.5-1.12)  | 1.63E-01 | 9.47E-01 |
| rs1800878  | 1 NTRK1 | 0.10 Rec | 2.35(0.73-7.54) | 1.52E-01 | 9.48E-01 |
| rs6677720  | 1 NTRK1 | 0.10 Rec | 2.35(0.73-7.54) | 1.52E-01 | 9.48E-01 |
| rs12564129 | 1 NTRK1 | 0.49 Rec | 0.96(0.73-1.27) | 7.77E-01 | 9.49E-01 |
| rs943551   | 1 NTRK1 | 0.49 Rec | 0.96(0.73-1.27) | 7.77E-01 | 9.49E-01 |
| rs2768762  | 1 NTRK1 | 0.19 Rec | 1.66(0.8-3.45)  | 1.71E-01 | 9.53E-01 |
| rs2644604  | 1 NTRK1 | 0.35 Rec | 0.79(0.54-1.15) | 2.25E-01 | 9.68E-01 |
| rs10908523 | 1 NTRK1 | 0.06 Add | 1.16(0.81-1.66) | 4.17E-01 | 9.77E-01 |
| rs2274497  | 1 NTRK1 | 0.09 Add | 1.08(0.8-1.46)  | 6.24E-01 | 9.85E-01 |
| rs943552   | 1 NTRK1 | 0.50 Rec | 0.93(0.7-1.23)  | 6.08E-01 | 9.85E-01 |
| rs11264577 | 1 NTRK1 | 0.09 Add | 1.07(0.79-1.46) | 6.42E-01 | 9.86E-01 |
| rs1410082  | 1 NTRK1 | 0.01 Add | 0.79(0.31-2.04) | 6.25E-01 | 9.89E-01 |
| rs12239574 | 1 NTRK1 | 0.01 Add | 0.79(0.31-2.04) | 6.25E-01 | 9.89E-01 |
| rs1800879  | 1 NTRK1 | 0.05 Dom | 0.97(0.65-1.44) | 8.79E-01 | 9.91E-01 |
| rs6337     | 1 NTRK1 | 0.04 Add | 1.13(0.73-1.74) | 5.96E-01 | 9.92E-01 |



|            |         |          |                  |          |          |
|------------|---------|----------|------------------|----------|----------|
| rs1800880  | 1 NTRK1 | 0.49 Rec | 0.97(0.73-1.29)  | 8.22E-01 | 9.92E-01 |
| rs2644596  | 1 NTRK1 | 0.41 Add | 0.94(0.79-1.11)  | 4.36E-01 | 9.92E-01 |
| rs598160   | 6 OPRM1 | 0.11 Rec | 8.08(1.59-41.13) | 1.18E-02 | 1.65E-01 |
| rs548646   | 6 OPRM1 | 0.11 Rec | 5.32(1.36-20.88) | 1.65E-02 | 3.16E-01 |
| rs613355   | 6 OPRM1 | 0.11 Rec | 6.12(1.28-29.15) | 2.29E-02 | 3.41E-01 |
| rs1853384  | 6 OPRM1 | 0.11 Rec | 4.96(1.24-19.88) | 2.36E-02 | 4.50E-01 |
| rs618207   | 6 OPRM1 | 0.11 Rec | 4.96(1.24-19.88) | 2.36E-02 | 4.50E-01 |
| rs9282821  | 6 OPRM1 | 0.23 Rec | 1.86(1.04-3.35)  | 3.75E-02 | 7.63E-01 |
| rs2075572  | 6 OPRM1 | 0.23 Rec | 1.8(1.01-3.21)   | 4.70E-02 | 8.32E-01 |
| rs681243   | 6 OPRM1 | 0.11 Rec | 3.85(0.9-16.37)  | 6.82E-02 | 8.68E-01 |
| rs613341   | 6 OPRM1 | 0.02 Add | 1.6(0.89-2.86)   | 1.16E-01 | 9.03E-01 |
| rs632395   | 6 OPRM1 | 0.02 Add | 1.58(0.88-2.83)  | 1.22E-01 | 9.13E-01 |
| rs599945   | 6 OPRM1 | 0.02 Add | 1.54(0.86-2.78)  | 1.47E-01 | 9.48E-01 |
| rs606148   | 6 OPRM1 | 0.02 Add | 1.54(0.86-2.78)  | 1.47E-01 | 9.48E-01 |
| rs9322447  | 6 OPRM1 | 0.23 Rec | 1.63(0.92-2.89)  | 9.54E-02 | 9.68E-01 |
| rs12209447 | 6 OPRM1 | 0.11 Add | 1(0.76-1.33)     | 9.76E-01 | 9.76E-01 |
| rs3798676  | 6 OPRM1 | 0.11 Add | 1(0.76-1.33)     | 9.76E-01 | 9.76E-01 |
| rs1323041  | 6 OPRM1 | 0.23 Rec | 1.58(0.89-2.79)  | 1.15E-01 | 9.80E-01 |
| rs648007   | 6 OPRM1 | 0.11 Rec | 3.17(0.71-14.09) | 1.29E-01 | 9.83E-01 |
| rs645027   | 6 OPRM1 | 0.12 Dom | 1.19(0.89-1.59)  | 2.38E-01 | 9.84E-01 |
| rs3778155  | 6 OPRM1 | 0.05 Add | 1.26(0.86-1.86)  | 2.40E-01 | 9.91E-01 |
| rs3778157  | 6 OPRM1 | 0.05 Add | 1.26(0.86-1.86)  | 2.40E-01 | 9.91E-01 |
| rs3778158  | 6 OPRM1 | 0.05 Add | 1.26(0.86-1.86)  | 2.40E-01 | 9.91E-01 |
| rs4870266  | 6 OPRM1 | 0.18 Rec | 1.73(0.82-3.62)  | 1.47E-01 | 9.92E-01 |
| rs7773995  | 6 OPRM1 | 0.05 Add | 1.25(0.84-1.84)  | 2.67E-01 | 9.94E-01 |
| rs3798683  | 6 OPRM1 | 0.35 Add | 0.88(0.74-1.06)  | 1.72E-01 | 9.96E-01 |
| rs9322445  | 6 OPRM1 | 0.05 Dom | 1.23(0.81-1.87)  | 3.23E-01 | 9.96E-01 |
| rs6936615  | 6 OPRM1 | 0.05 Dom | 1.23(0.81-1.87)  | 3.23E-01 | 9.96E-01 |
| rs477292   | 6 OPRM1 | 0.05 Dom | 1.23(0.81-1.87)  | 3.23E-01 | 9.96E-01 |
| rs557748   | 6 OPRM1 | 0.05 Dom | 1.23(0.81-1.87)  | 3.23E-01 | 9.96E-01 |
| rs589046   | 6 OPRM1 | 0.16 Rec | 1.77(0.77-4.1)   | 1.81E-01 | 9.97E-01 |
| rs616585   | 6 OPRM1 | 0.02 Add | 1.36(0.74-2.5)   | 3.22E-01 | 9.98E-01 |
| rs628618   | 6 OPRM1 | 0.02 Add | 1.36(0.74-2.5)   | 3.22E-01 | 9.98E-01 |
| rs544093   | 6 OPRM1 | 0.02 Add | 1.36(0.74-2.5)   | 3.22E-01 | 9.98E-01 |

|            |         |          |                 |          |          |
|------------|---------|----------|-----------------|----------|----------|
| rs556716   | 6 OPRM1 | 0.02 Add | 1.36(0.74-2.5)  | 3.22E-01 | 9.98E-01 |
| rs524731   | 6 OPRM1 | 0.05 Add | 1.22(0.83-1.79) | 3.16E-01 | 9.98E-01 |
| rs499796   | 6 OPRM1 | 0.05 Add | 1.22(0.83-1.79) | 3.16E-01 | 9.98E-01 |
| rs607759   | 6 OPRM1 | 0.05 Add | 1.22(0.83-1.79) | 3.16E-01 | 9.98E-01 |
| rs636433   | 6 OPRM1 | 0.02 Add | 1.34(0.73-2.46) | 3.40E-01 | 9.98E-01 |
| rs649840   | 6 OPRM1 | 0.02 Add | 1.34(0.73-2.46) | 3.40E-01 | 9.98E-01 |
| rs511435   | 6 OPRM1 | 0.05 Dom | 1.2(0.8-1.82)   | 3.77E-01 | 9.99E-01 |
| rs3778151  | 6 OPRM1 | 0.05 Add | 1.2(0.81-1.78)  | 3.57E-01 | 9.99E-01 |
| rs3778147  | 6 OPRM1 | 0.05 Add | 1.2(0.81-1.78)  | 3.57E-01 | 9.99E-01 |
| rs1461773  | 6 OPRM1 | 0.05 Add | 1.2(0.81-1.78)  | 3.57E-01 | 9.99E-01 |
| rs1381376  | 6 OPRM1 | 0.05 Add | 1.2(0.81-1.78)  | 3.57E-01 | 9.99E-01 |
| rs17209711 | 6 OPRM1 | 0.05 Add | 1.2(0.81-1.78)  | 3.57E-01 | 9.99E-01 |
| rs3823010  | 6 OPRM1 | 0.05 Add | 1.2(0.81-1.78)  | 3.57E-01 | 9.99E-01 |
| rs9479754  | 6 OPRM1 | 0.05 Add | 1.2(0.81-1.78)  | 3.57E-01 | 9.99E-01 |
| rs9478506  | 6 OPRM1 | 0.05 Add | 0.83(0.56-1.24) | 3.66E-01 | 9.99E-01 |
| rs1799971  | 6 OPRM1 | 0.35 Dom | 0.9(0.7-1.15)   | 3.94E-01 | 9.99E-01 |
| rs650245   | 6 OPRM1 | 0.02 Add | 1.31(0.71-2.42) | 3.92E-01 | 9.99E-01 |
| rs617648   | 6 OPRM1 | 0.02 Add | 1.31(0.71-2.42) | 3.92E-01 | 9.99E-01 |
| rs590761   | 6 OPRM1 | 0.02 Add | 1.31(0.71-2.42) | 3.92E-01 | 9.99E-01 |
| rs653107   | 6 OPRM1 | 0.02 Add | 1.31(0.71-2.42) | 3.92E-01 | 9.99E-01 |
| rs664247   | 6 OPRM1 | 0.02 Add | 1.31(0.71-2.42) | 3.92E-01 | 9.99E-01 |
| rs3778149  | 6 OPRM1 | 0.05 Add | 1.18(0.8-1.75)  | 3.91E-01 | 9.99E-01 |
| rs6927269  | 6 OPRM1 | 0.05 Add | 1.18(0.8-1.75)  | 3.91E-01 | 9.99E-01 |
| rs3778150  | 6 OPRM1 | 0.05 Add | 1.18(0.8-1.75)  | 3.91E-01 | 9.99E-01 |
| rs3778145  | 6 OPRM1 | 0.05 Add | 1.19(0.8-1.76)  | 4.01E-01 | 9.99E-01 |
| rs13194785 | 6 OPRM1 | 0.09 Add | 0.89(0.66-1.18) | 4.11E-01 | 9.99E-01 |
| rs3798678  | 6 OPRM1 | 0.04 Add | 1.01(0.65-1.57) | 9.76E-01 | 9.99E-01 |
| rs540825   | 6 OPRM1 | 0.07 Add | 1.14(0.83-1.58) | 4.20E-01 | 9.99E-01 |
| rs495491   | 6 OPRM1 | 0.16 Rec | 1.6(0.71-3.64)  | 2.58E-01 | 1.00E+00 |
| rs1323042  | 6 OPRM1 | 0.22 Rec | 1.42(0.77-2.61) | 2.64E-01 | 1.00E+00 |
| rs12203621 | 6 OPRM1 | 0.12 Rec | 1.45(0.48-4.43) | 5.11E-01 | 1.00E+00 |
| rs3798688  | 6 OPRM1 | 0.12 Rec | 1.45(0.48-4.43) | 5.11E-01 | 1.00E+00 |
| rs599548   | 6 OPRM1 | 0.12 Rec | 1.45(0.48-4.43) | 5.11E-01 | 1.00E+00 |
| rs9479757  | 6 OPRM1 | 0.05 Add | 1.14(0.79-1.65) | 4.80E-01 | 1.00E+00 |

|            |         |          |                 |          |          |
|------------|---------|----------|-----------------|----------|----------|
| rs620496   | 6 OPRM1 | 0.02 Add | 1.02(0.52-2.02) | 9.47E-01 | 1.00E+00 |
| rs635522   | 6 OPRM1 | 0.02 Add | 1.02(0.52-2.02) | 9.47E-01 | 1.00E+00 |
| rs494328   | 6 OPRM1 | 0.02 Add | 1.02(0.52-2.02) | 9.47E-01 | 1.00E+00 |
| rs625109   | 6 OPRM1 | 0.02 Add | 1.02(0.52-2.02) | 9.47E-01 | 1.00E+00 |
| rs510769   | 6 OPRM1 | 0.15 Add | 1.08(0.85-1.38) | 5.17E-01 | 1.00E+00 |
| rs514980   | 6 OPRM1 | 0.05 Dom | 1.12(0.75-1.68) | 5.69E-01 | 1.00E+00 |
| rs9322446  | 6 OPRM1 | 0.05 Dom | 0.89(0.6-1.33)  | 5.80E-01 | 1.00E+00 |
| rs10485057 | 6 OPRM1 | 0.04 Add | 0.88(0.55-1.41) | 6.03E-01 | 1.00E+00 |
| rs676252   | 6 OPRM1 | 0.09 Dom | 0.91(0.66-1.25) | 5.69E-01 | 1.00E+00 |
| rs3778156  | 6 OPRM1 | 0.04 Add | 1.11(0.72-1.71) | 6.42E-01 | 1.00E+00 |
| rs9479756  | 6 OPRM1 | 0.04 Add | 1.11(0.7-1.76)  | 6.62E-01 | 1.00E+00 |
| rs6912029  | 6 OPRM1 | 0.11 Dom | 1.01(0.75-1.37) | 9.44E-01 | 1.00E+00 |
| rs12205732 | 6 OPRM1 | 0.11 Dom | 1.01(0.75-1.37) | 9.44E-01 | 1.00E+00 |
| rs583664   | 6 OPRM1 | 0.09 Dom | 0.92(0.67-1.26) | 6.09E-01 | 1.00E+00 |
| rs644261   | 6 OPRM1 | 0.09 Dom | 0.92(0.67-1.26) | 6.09E-01 | 1.00E+00 |
| rs677830   | 6 OPRM1 | 0.09 Dom | 0.92(0.67-1.27) | 6.13E-01 | 1.00E+00 |
| rs633387   | 6 OPRM1 | 0.09 Dom | 0.92(0.67-1.27) | 6.13E-01 | 1.00E+00 |
| rs648893   | 6 OPRM1 | 0.09 Dom | 0.92(0.67-1.26) | 6.09E-01 | 1.00E+00 |
| rs558948   | 6 OPRM1 | 0.09 Dom | 0.92(0.67-1.26) | 6.09E-01 | 1.00E+00 |
| rs13193545 | 6 OPRM1 | 0.02 Add | 0.86(0.47-1.61) | 6.46E-01 | 1.00E+00 |
| rs610231   | 6 OPRM1 | 0.06 Add | 1.09(0.75-1.57) | 6.61E-01 | 1.00E+00 |
| rs606545   | 6 OPRM1 | 0.09 Dom | 0.92(0.67-1.27) | 6.13E-01 | 1.00E+00 |
| rs647192   | 6 OPRM1 | 0.09 Dom | 0.92(0.67-1.27) | 6.13E-01 | 1.00E+00 |
| rs609148   | 6 OPRM1 | 0.09 Dom | 0.92(0.67-1.27) | 6.13E-01 | 1.00E+00 |
| rs650825   | 6 OPRM1 | 0.09 Dom | 0.92(0.67-1.27) | 6.13E-01 | 1.00E+00 |
| rs504932   | 6 OPRM1 | 0.09 Dom | 0.92(0.67-1.27) | 6.13E-01 | 1.00E+00 |
| rs12210856 | 6 OPRM1 | 0.11 Add | 0.99(0.75-1.3)  | 9.39E-01 | 1.00E+00 |
| rs520321   | 6 OPRM1 | 0.04 Add | 1.04(0.67-1.61) | 8.78E-01 | 1.00E+00 |
| rs6923231  | 6 OPRM1 | 0.04 Add | 1.04(0.67-1.61) | 8.78E-01 | 1.00E+00 |
| rs3778153  | 6 OPRM1 | 0.04 Add | 1.04(0.67-1.61) | 8.78E-01 | 1.00E+00 |
| rs3778146  | 6 OPRM1 | 0.04 Add | 1.04(0.67-1.61) | 8.78E-01 | 1.00E+00 |
| rs3778148  | 6 OPRM1 | 0.04 Add | 1.04(0.67-1.61) | 8.78E-01 | 1.00E+00 |
| rs9478503  | 6 OPRM1 | 0.04 Add | 1.04(0.67-1.61) | 8.78E-01 | 1.00E+00 |
| rs9478504  | 6 OPRM1 | 0.04 Add | 1.04(0.67-1.61) | 8.78E-01 | 1.00E+00 |

|            |          |          |                 |          |          |
|------------|----------|----------|-----------------|----------|----------|
| rs17275521 | 6 OPRM1  | 0.04 Add | 1.04(0.67-1.61) | 8.78E-01 | 1.00E+00 |
| rs7772959  | 6 OPRM1  | 0.04 Add | 1.04(0.67-1.61) | 8.78E-01 | 1.00E+00 |
| rs9285542  | 6 OPRM1  | 0.04 Add | 1.04(0.67-1.61) | 8.78E-01 | 1.00E+00 |
| rs509544   | 6 OPRM1  | 0.04 Add | 1.04(0.67-1.61) | 8.78E-01 | 1.00E+00 |
| rs9371776  | 6 OPRM1  | 0.01 Add | 1.16(0.53-2.53) | 7.17E-01 | 1.00E+00 |
| rs642489   | 6 OPRM1  | 0.09 Dom | 0.93(0.68-1.28) | 6.70E-01 | 1.00E+00 |
| rs3778152  | 6 OPRM1  | 0.11 Dom | 1.02(0.76-1.38) | 8.90E-01 | 1.00E+00 |
| rs563649   | 6 OPRM1  | 0.11 Rec | 0.76(0.24-2.41) | 6.38E-01 | 1.00E+00 |
| rs511420   | 6 OPRM1  | 0.02 Add | 1.08(0.55-2.11) | 8.23E-01 | 1.00E+00 |
| rs653011   | 6 OPRM1  | 0.02 Add | 1.08(0.55-2.11) | 8.23E-01 | 1.00E+00 |
| rs645189   | 6 OPRM1  | 0.02 Add | 1.08(0.55-2.11) | 8.23E-01 | 1.00E+00 |
| rs623956   | 6 OPRM1  | 0.09 Dom | 0.95(0.68-1.31) | 7.43E-01 | 1.00E+00 |
| rs668394   | 6 OPRM1  | 0.04 Add | 1.06(0.68-1.64) | 7.96E-01 | 1.00E+00 |
| rs2010884  | 6 OPRM1  | 0.38 Dom | 1.01(0.79-1.29) | 9.30E-01 | 1.00E+00 |
| rs9478501  | 6 OPRM1  | 0.04 Add | 1.02(0.66-1.58) | 9.27E-01 | 1.00E+00 |
| rs634479   | 6 OPRM1  | 0.04 Add | 1.04(0.67-1.62) | 8.59E-01 | 1.00E+00 |
| rs10457090 | 6 OPRM1  | 0.11 Dom | 1.03(0.76-1.39) | 8.57E-01 | 1.00E+00 |
| rs7748401  | 6 OPRM1  | 0.11 Dom | 1.03(0.76-1.39) | 8.57E-01 | 1.00E+00 |
| rs10485058 | 6 OPRM1  | 0.05 Add | 0.95(0.64-1.42) | 8.08E-01 | 1.00E+00 |
| rs1883005  | 15 PAR4  | 0.30 Rec | 1.5(1.01-2.23)  | 4.36E-02 | 3.34E-01 |
| rs2739768  | 15 PAR4  | 0.25 Rec | 1.47(0.87-2.47) | 1.48E-01 | 7.16E-01 |
| rs2719923  | 15 PAR4  | 0.03 Dom | 0.89(0.53-1.5)  | 6.70E-01 | 7.17E-01 |
| rs2739765  | 15 PAR4  | 0.24 Rec | 1.38(0.86-2.19) | 1.81E-01 | 7.60E-01 |
| rs7180829  | 15 PAR4  | 0.24 Rec | 1.34(0.84-2.15) | 2.18E-01 | 8.19E-01 |
| rs11855532 | 15 PAR4  | 0.26 Add | 1.11(0.92-1.35) | 2.84E-01 | 8.49E-01 |
| rs1883006  | 15 PAR4  | 0.28 Rec | 1.1(0.72-1.67)  | 6.70E-01 | 8.91E-01 |
| rs3026688  | 22 PICK1 | 0.23 Dom | 1.02(0.8-1.31)  | 8.59E-01 | 8.59E-01 |
| rs2076370  | 22 PICK1 | 0.29 Dom | 0.82(0.64-1.04) | 9.86E-02 | 9.37E-01 |
| rs738443   | 22 PICK1 | 0.29 Dom | 0.82(0.64-1.04) | 9.86E-02 | 9.37E-01 |
| rs2076369  | 22 PICK1 | 0.29 Dom | 0.82(0.64-1.04) | 9.86E-02 | 9.37E-01 |
| rs4821735  | 22 PICK1 | 0.29 Dom | 0.82(0.64-1.04) | 9.86E-02 | 9.37E-01 |
| rs6000991  | 22 PICK1 | 0.29 Dom | 0.82(0.64-1.04) | 9.86E-02 | 9.37E-01 |
| rs13054174 | 22 PICK1 | 0.01 Add | 0.57(0.24-1.37) | 2.08E-01 | 9.39E-01 |
| rs4384887  | 22 PICK1 | 0.24 Add | 0.85(0.69-1.04) | 1.14E-01 | 9.39E-01 |

|            |          |          |                 |          |          |
|------------|----------|----------|-----------------|----------|----------|
| rs5756890  | 22 PICK1 | 0.24 Add | 0.85(0.69-1.04) | 1.14E-01 | 9.39E-01 |
| rs760973   | 22 PICK1 | 0.24 Add | 0.85(0.69-1.04) | 1.14E-01 | 9.39E-01 |
| rs742395   | 22 PICK1 | 0.24 Add | 0.85(0.69-1.04) | 1.14E-01 | 9.40E-01 |
| rs2012859  | 22 PICK1 | 0.36 Dom | 1.08(0.84-1.38) | 5.60E-01 | 9.51E-01 |
| rs742396   | 22 PICK1 | 0.29 Dom | 0.82(0.65-1.05) | 1.17E-01 | 9.53E-01 |
| rs3026681  | 22 PICK1 | 0.01 Add | 1.49(0.73-3.06) | 2.77E-01 | 9.78E-01 |
| rs2018980  | 22 PICK1 | 0.29 Dom | 0.84(0.66-1.06) | 1.45E-01 | 9.78E-01 |
| rs2076371  | 22 PICK1 | 0.06 Add | 0.85(0.59-1.21) | 3.59E-01 | 9.87E-01 |
| rs13053681 | 22 PICK1 | 0.29 Add | 1.13(0.93-1.37) | 2.08E-01 | 9.88E-01 |
| rs2267366  | 22 PICK1 | 0.16 Dom | 1.19(0.91-1.56) | 1.95E-01 | 9.88E-01 |
| rs4821733  | 22 PICK1 | 0.39 Dom | 0.93(0.72-1.19) | 5.50E-01 | 9.88E-01 |
| rs2235573  | 22 PICK1 | 0.47 Dom | 0.84(0.64-1.1)  | 2.16E-01 | 9.89E-01 |
| rs5756908  | 22 PICK1 | 0.47 Dom | 0.84(0.64-1.1)  | 2.16E-01 | 9.89E-01 |
| rs4821732  | 22 PICK1 | 0.04 Add | 1.24(0.82-1.88) | 3.10E-01 | 9.91E-01 |
| rs6000987  | 22 PICK1 | 0.04 Add | 0.84(0.53-1.31) | 4.37E-01 | 9.91E-01 |
| rs2076372  | 22 PICK1 | 0.36 Add | 0.97(0.81-1.16) | 7.59E-01 | 9.94E-01 |
| rs3952     | 22 PICK1 | 0.35 Dom | 1.08(0.85-1.37) | 5.49E-01 | 9.95E-01 |
| rs3026685  | 22 PICK1 | 0.35 Dom | 1.07(0.84-1.36) | 5.91E-01 | 9.95E-01 |
| rs3948     | 22 PICK1 | 0.35 Dom | 1.07(0.84-1.36) | 5.91E-01 | 9.95E-01 |
| rs737662   | 22 PICK1 | 0.34 Rec | 1.09(0.75-1.58) | 6.62E-01 | 9.96E-01 |
| rs760975   | 22 PICK1 | 0.19 Dom | 0.88(0.69-1.14) | 3.41E-01 | 9.96E-01 |
| rs1004764  | 22 PICK1 | 0.07 Add | 0.89(0.64-1.24) | 4.89E-01 | 9.97E-01 |
| rs8135665  | 22 PICK1 | 0.11 Rec | 1.51(0.29-7.96) | 6.24E-01 | 9.97E-01 |
| rs8142185  | 22 PICK1 | 0.34 Dom | 1.04(0.82-1.33) | 7.38E-01 | 9.97E-01 |
| rs13428823 | 2 POMC   | 0.30 Rec | 1.13(0.75-1.7)  | 5.65E-01 | 8.08E-01 |
| rs6545976  | 2 POMC   | 0.08 Add | 0.92(0.67-1.25) | 5.97E-01 | 8.76E-01 |
| rs6719226  | 2 POMC   | 0.08 Add | 0.92(0.67-1.25) | 5.97E-01 | 8.76E-01 |
| rs3795955  | 2 POMC   | 0.27 Rec | 1.21(0.78-1.89) | 3.91E-01 | 9.05E-01 |
| rs1561289  | 2 POMC   | 0.30 Rec | 1.2(0.79-1.81)  | 3.85E-01 | 9.10E-01 |
| rs4665774  | 2 POMC   | 0.18 Rec | 1.59(0.84-3.04) | 1.57E-01 | 9.22E-01 |
| rs4665775  | 2 POMC   | 0.18 Rec | 1.59(0.84-3.04) | 1.57E-01 | 9.22E-01 |
| rs4665773  | 2 POMC   | 0.18 Rec | 1.59(0.84-3.04) | 1.57E-01 | 9.22E-01 |
| rs4665771  | 2 POMC   | 0.18 Rec | 1.59(0.84-3.04) | 1.57E-01 | 9.22E-01 |
| rs874401   | 2 POMC   | 0.18 Rec | 1.59(0.84-3.04) | 1.57E-01 | 9.22E-01 |

|            |            |          |                 |          |          |
|------------|------------|----------|-----------------|----------|----------|
| rs934778   | 2 POMC     | 0.11 Dom | 1.14(0.85-1.53) | 3.79E-01 | 9.64E-01 |
| rs3731634  | 2 POMC     | 0.32 Rec | 0.79(0.54-1.16) | 2.35E-01 | 9.65E-01 |
| rs3769671  | 2 POMC     | 0.05 Dom | 1.19(0.81-1.75) | 3.73E-01 | 9.66E-01 |
| rs6545975  | 2 POMC     | 0.39 Rec | 1.19(0.86-1.65) | 3.03E-01 | 9.68E-01 |
| rs7565877  | 2 POMC     | 0.05 Dom | 1.16(0.78-1.73) | 4.50E-01 | 9.73E-01 |
| rs7605927  | 2 POMC     | 0.39 Rec | 1.18(0.85-1.65) | 3.17E-01 | 9.74E-01 |
| rs6713532  | 2 POMC     | 0.39 Rec | 1.18(0.85-1.63) | 3.35E-01 | 9.79E-01 |
| rs2118404  | 2 POMC     | 0.39 Rec | 1.16(0.84-1.61) | 3.72E-01 | 9.85E-01 |
| rs1866146  | 2 POMC     | 0.39 Rec | 1.16(0.83-1.61) | 3.82E-01 | 9.86E-01 |
| rs12473543 | 2 POMC     | 0.40 Rec | 1.16(0.84-1.6)  | 3.64E-01 | 9.86E-01 |
| rs1877032  | 17 PPP1R1B | 0.03 Add | 1.54(0.91-2.58) | 1.05E-01 | 3.34E-01 |
| rs1874228  | 17 PPP1R1B | 0.44 Rec | 0.77(0.56-1.05) | 9.82E-02 | 4.20E-01 |
| rs2271309  | 17 PPP1R1B | 0.44 Add | 0.89(0.75-1.05) | 1.67E-01 | 4.76E-01 |
| rs879606   | 17 PPP1R1B | 0.44 Add | 0.89(0.75-1.06) | 1.99E-01 | 5.40E-01 |
| rs9972882  | 17 PPP1R1B | 0.41 Dom | 0.93(0.72-1.19) | 5.53E-01 | 5.53E-01 |
| rs1495099  | 17 PPP1R1B | 0.44 Add | 0.9(0.76-1.07)  | 2.43E-01 | 6.17E-01 |
| rs3764352  | 17 PPP1R1B | 0.44 Add | 0.9(0.76-1.07)  | 2.43E-01 | 6.17E-01 |
| rs907094   | 17 PPP1R1B | 0.44 Add | 0.91(0.76-1.08) | 2.63E-01 | 6.49E-01 |
| rs9915323  | 17 PPP1R1B | 0.45 Rec | 0.84(0.62-1.14) | 2.66E-01 | 7.43E-01 |
| rs12453682 | 17 PPP1R1B | 0.43 Rec | 0.85(0.62-1.17) | 3.15E-01 | 7.66E-01 |
| rs758943   | 7 PRKAR2B  | 0.37 Rec | 1.55(1.1-2.18)  | 1.27E-02 | 3.71E-01 |
| rs2237648  | 7 PRKAR2B  | 0.37 Rec | 1.55(1.1-2.18)  | 1.27E-02 | 3.71E-01 |
| rs11766415 | 7 PRKAR2B  | 0.37 Add | 1.23(1.03-1.46) | 1.98E-02 | 3.75E-01 |
| rs257384   | 7 PRKAR2B  | 0.39 Rec | 1.53(1.09-2.14) | 1.38E-02 | 3.83E-01 |
| rs10227616 | 7 PRKAR2B  | 0.39 Rec | 1.5(1.08-2.1)   | 1.58E-02 | 4.17E-01 |
| rs2395836  | 7 PRKAR2B  | 0.39 Rec | 1.46(1.04-2.05) | 2.82E-02 | 5.82E-01 |
| rs2395833  | 7 PRKAR2B  | 0.45 Rec | 1.37(1.02-1.83) | 3.74E-02 | 6.66E-01 |
| rs3801969  | 7 PRKAR2B  | 0.38 Rec | 1.41(1.01-1.98) | 4.64E-02 | 7.35E-01 |
| rs741008   | 7 PRKAR2B  | 0.38 Rec | 1.39(0.99-1.95) | 5.47E-02 | 7.84E-01 |
| rs6969719  | 7 PRKAR2B  | 0.41 Rec | 1.34(0.97-1.85) | 8.06E-02 | 8.88E-01 |
| rs10487268 | 7 PRKAR2B  | 0.02 Add | 1.03(0.51-2.07) | 9.34E-01 | 9.34E-01 |
| rs9648946  | 7 PRKAR2B  | 0.38 Add | 1.14(0.95-1.35) | 1.53E-01 | 9.39E-01 |
| rs2707378  | 7 PRKAR2B  | 0.09 Add | 0.82(0.61-1.12) | 2.11E-01 | 9.40E-01 |
| rs2237654  | 7 PRKAR2B  | 0.38 Add | 1.13(0.95-1.35) | 1.68E-01 | 9.42E-01 |

|            |           |          |                 |          |          |
|------------|-----------|----------|-----------------|----------|----------|
| rs12667954 | 7 PRKAR2B | 0.38 Add | 1.13(0.95-1.35) | 1.68E-01 | 9.42E-01 |
| rs10235601 | 7 PRKAR2B | 0.09 Add | 0.83(0.61-1.12) | 2.29E-01 | 9.47E-01 |
| rs6957586  | 7 PRKAR2B | 0.45 Rec | 1.27(0.94-1.71) | 1.14E-01 | 9.49E-01 |
| rs12705403 | 7 PRKAR2B | 0.37 Add | 1.12(0.94-1.34) | 1.92E-01 | 9.57E-01 |
| rs3735613  | 7 PRKAR2B | 0.38 Rec | 1.3(0.93-1.83)  | 1.30E-01 | 9.58E-01 |
| rs9656136  | 7 PRKAR2B | 0.12 Add | 0.82(0.64-1.06) | 1.36E-01 | 9.61E-01 |
| rs917760   | 7 PRKAR2B | 0.37 Add | 1.12(0.94-1.34) | 1.99E-01 | 9.62E-01 |
| rs7809330  | 7 PRKAR2B | 0.37 Add | 1.12(0.94-1.34) | 2.06E-01 | 9.66E-01 |
| rs717099   | 7 PRKAR2B | 0.45 Rec | 1.22(0.9-1.64)  | 1.98E-01 | 9.72E-01 |
| rs6466156  | 7 PRKAR2B | 0.45 Rec | 1.22(0.9-1.64)  | 2.01E-01 | 9.73E-01 |
| rs6466157  | 7 PRKAR2B | 0.37 Rec | 1.25(0.88-1.77) | 2.06E-01 | 9.75E-01 |
| rs2536503  | 7 PRKAR2B | 0.22 Add | 0.88(0.71-1.07) | 2.00E-01 | 9.76E-01 |
| rs2283037  | 7 PRKAR2B | 0.37 Add | 1.12(0.94-1.33) | 2.25E-01 | 9.77E-01 |
| rs12674011 | 7 PRKAR2B | 0.39 Rec | 1.28(0.91-1.8)  | 1.62E-01 | 9.79E-01 |
| rs6955387  | 7 PRKAR2B | 0.46 Rec | 1.2(0.89-1.62)  | 2.27E-01 | 9.79E-01 |
| rs10281856 | 7 PRKAR2B | 0.45 Rec | 1.22(0.91-1.64) | 1.91E-01 | 9.80E-01 |
| rs2536490  | 7 PRKAR2B | 0.04 Add | 1.22(0.8-1.88)  | 3.52E-01 | 9.80E-01 |
| rs2536505  | 7 PRKAR2B | 0.22 Add | 0.87(0.71-1.06) | 1.70E-01 | 9.80E-01 |
| rs2302453  | 7 PRKAR2B | 0.37 Rec | 1.2(0.84-1.7)   | 3.11E-01 | 9.80E-01 |
| rs2237656  | 7 PRKAR2B | 0.37 Rec | 1.2(0.84-1.7)   | 3.11E-01 | 9.80E-01 |
| rs2237652  | 7 PRKAR2B | 0.37 Add | 1.1(0.92-1.31)  | 3.11E-01 | 9.80E-01 |
| rs1860803  | 7 PRKAR2B | 0.45 Dom | 1.12(0.86-1.45) | 4.04E-01 | 9.80E-01 |
| rs2707374  | 7 PRKAR2B | 0.22 Add | 0.88(0.72-1.08) | 2.20E-01 | 9.81E-01 |
| rs9656135  | 7 PRKAR2B | 0.18 Rec | 0.71(0.36-1.4)  | 3.23E-01 | 9.81E-01 |
| rs11760261 | 7 PRKAR2B | 0.45 Dom | 1.11(0.85-1.44) | 4.53E-01 | 9.82E-01 |
| rs3801968  | 7 PRKAR2B | 0.45 Dom | 1.11(0.85-1.44) | 4.53E-01 | 9.82E-01 |
| rs12055940 | 7 PRKAR2B | 0.08 Dom | 0.88(0.63-1.23) | 4.57E-01 | 9.82E-01 |
| rs2237650  | 7 PRKAR2B | 0.37 Dom | 0.88(0.68-1.12) | 2.86E-01 | 9.82E-01 |
| rs10249401 | 7 PRKAR2B | 0.22 Add | 0.87(0.71-1.07) | 1.88E-01 | 9.82E-01 |
| rs2299419  | 7 PRKAR2B | 0.22 Add | 0.87(0.71-1.07) | 1.88E-01 | 9.82E-01 |
| rs1544582  | 7 PRKAR2B | 0.37 Dom | 0.88(0.69-1.12) | 2.91E-01 | 9.82E-01 |
| rs7778076  | 7 PRKAR2B | 0.08 Dom | 0.88(0.63-1.23) | 4.54E-01 | 9.83E-01 |
| rs257376   | 7 PRKAR2B | 0.48 Dom | 0.83(0.64-1.09) | 1.89E-01 | 9.83E-01 |
| rs12154324 | 7 PRKAR2B | 0.08 Dom | 0.89(0.63-1.25) | 4.96E-01 | 9.83E-01 |

|            |           |          |                 |          |          |
|------------|-----------|----------|-----------------|----------|----------|
| rs13311274 | 7 PRKAR2B | 0.45 Rec | 1.2(0.89-1.61)  | 2.40E-01 | 9.84E-01 |
| rs2250121  | 7 PRKAR2B | 0.08 Dom | 0.88(0.63-1.23) | 4.68E-01 | 9.84E-01 |
| rs997381   | 7 PRKAR2B | 0.37 Dom | 0.88(0.69-1.12) | 3.07E-01 | 9.86E-01 |
| rs2536492  | 7 PRKAR2B | 0.37 Dom | 0.88(0.69-1.12) | 3.07E-01 | 9.86E-01 |
| rs2237649  | 7 PRKAR2B | 0.37 Dom | 0.88(0.69-1.13) | 3.22E-01 | 9.88E-01 |
| rs6466160  | 7 PRKAR2B | 0.08 Dom | 0.89(0.64-1.24) | 4.89E-01 | 9.89E-01 |
| rs975935   | 7 PRKAR2B | 0.08 Dom | 0.89(0.64-1.24) | 4.89E-01 | 9.89E-01 |
| rs257373   | 7 PRKAR2B | 0.08 Dom | 0.89(0.64-1.24) | 4.89E-01 | 9.89E-01 |
| rs6977868  | 7 PRKAR2B | 0.08 Dom | 0.89(0.64-1.24) | 4.89E-01 | 9.89E-01 |
| rs11767623 | 7 PRKAR2B | 0.08 Dom | 0.89(0.64-1.24) | 4.89E-01 | 9.89E-01 |
| rs12705405 | 7 PRKAR2B | 0.08 Dom | 0.89(0.64-1.24) | 4.89E-01 | 9.89E-01 |
| rs257377   | 7 PRKAR2B | 0.08 Dom | 0.89(0.64-1.24) | 4.89E-01 | 9.89E-01 |
| rs6947857  | 7 PRKAR2B | 0.08 Dom | 0.89(0.64-1.24) | 4.89E-01 | 9.89E-01 |
| rs257372   | 7 PRKAR2B | 0.08 Dom | 0.89(0.64-1.24) | 4.89E-01 | 9.89E-01 |
| rs257378   | 7 PRKAR2B | 0.08 Dom | 0.89(0.64-1.24) | 4.89E-01 | 9.89E-01 |
| rs3779500  | 7 PRKAR2B | 0.08 Dom | 0.89(0.64-1.24) | 4.89E-01 | 9.89E-01 |
| rs257375   | 7 PRKAR2B | 0.08 Dom | 0.89(0.64-1.24) | 4.89E-01 | 9.89E-01 |
| rs3729876  | 7 PRKAR2B | 0.08 Dom | 0.89(0.64-1.24) | 4.89E-01 | 9.89E-01 |
| rs6946931  | 7 PRKAR2B | 0.08 Dom | 0.89(0.64-1.24) | 4.89E-01 | 9.89E-01 |
| rs6960148  | 7 PRKAR2B | 0.08 Dom | 0.89(0.64-1.24) | 4.89E-01 | 9.89E-01 |
| rs10253291 | 7 PRKAR2B | 0.08 Dom | 0.89(0.64-1.24) | 4.89E-01 | 9.89E-01 |
| rs257382   | 7 PRKAR2B | 0.08 Dom | 0.89(0.64-1.24) | 4.89E-01 | 9.89E-01 |
| rs3729877  | 7 PRKAR2B | 0.08 Dom | 0.89(0.64-1.24) | 4.89E-01 | 9.89E-01 |
| rs1981696  | 7 PRKAR2B | 0.08 Dom | 0.89(0.64-1.24) | 4.89E-01 | 9.89E-01 |
| rs10253172 | 7 PRKAR2B | 0.08 Dom | 0.89(0.64-1.24) | 4.89E-01 | 9.89E-01 |
| rs1476878  | 7 PRKAR2B | 0.37 Dom | 0.89(0.69-1.13) | 3.29E-01 | 9.90E-01 |
| rs11767753 | 7 PRKAR2B | 0.08 Dom | 0.9(0.64-1.25)  | 5.26E-01 | 9.91E-01 |
| rs11764389 | 7 PRKAR2B | 0.08 Dom | 0.9(0.64-1.25)  | 5.26E-01 | 9.91E-01 |
| rs12705404 | 7 PRKAR2B | 0.34 Rec | 1.02(0.71-1.47) | 9.10E-01 | 9.92E-01 |
| rs1860804  | 7 PRKAR2B | 0.08 Dom | 0.9(0.64-1.25)  | 5.26E-01 | 9.92E-01 |
| rs1860805  | 7 PRKAR2B | 0.08 Dom | 0.9(0.64-1.25)  | 5.26E-01 | 9.92E-01 |
| rs10248105 | 7 PRKAR2B | 0.08 Dom | 0.9(0.64-1.25)  | 5.26E-01 | 9.92E-01 |
| rs11760966 | 7 PRKAR2B | 0.08 Dom | 0.9(0.64-1.25)  | 5.26E-01 | 9.92E-01 |
| rs2191917  | 7 PRKAR2B | 0.08 Dom | 0.91(0.66-1.27) | 5.89E-01 | 9.95E-01 |



|            |           |          |                 |          |          |
|------------|-----------|----------|-----------------|----------|----------|
| rs17153861 | 7 PRKAR2B | 0.08 Dom | 0.91(0.66-1.27) | 5.89E-01 | 9.95E-01 |
| rs17425839 | 7 PRKAR2B | 0.08 Dom | 0.91(0.66-1.27) | 5.89E-01 | 9.95E-01 |
| rs2244846  | 7 PRKAR2B | 0.37 Dom | 0.89(0.7-1.14)  | 3.73E-01 | 9.95E-01 |
| rs1476879  | 7 PRKAR2B | 0.37 Dom | 0.9(0.7-1.15)   | 3.82E-01 | 9.96E-01 |
| rs2536495  | 7 PRKAR2B | 0.37 Dom | 0.9(0.7-1.15)   | 3.82E-01 | 9.96E-01 |
| rs2536508  | 7 PRKAR2B | 0.33 Rec | 1.08(0.74-1.57) | 6.79E-01 | 9.96E-01 |
| rs257387   | 7 PRKAR2B | 0.09 Dom | 0.93(0.67-1.28) | 6.51E-01 | 9.98E-01 |
| rs17340577 | 7 PRKAR2B | 0.08 Dom | 0.96(0.68-1.35) | 8.18E-01 | 9.99E-01 |
| rs2251838  | 7 PRKAR2B | 0.33 Dom | 0.97(0.76-1.23) | 7.89E-01 | 9.99E-01 |
| rs2536501  | 7 PRKAR2B | 0.32 Rec | 0.95(0.65-1.38) | 7.72E-01 | 9.99E-01 |
| rs2536504  | 7 PRKAR2B | 0.32 Rec | 0.95(0.65-1.38) | 7.72E-01 | 9.99E-01 |
| rs2536502  | 7 PRKAR2B | 0.32 Rec | 0.95(0.65-1.38) | 7.72E-01 | 9.99E-01 |
| rs6960842  | 7 PRKAR2B | 0.41 Add | 0.96(0.81-1.14) | 6.57E-01 | 9.99E-01 |
| rs27074    | 5 SLC6A3  | 0.40 Dom | 1.47(1.14-1.89) | 2.92E-03 | 1.48E-01 |
| rs2270912  | 5 SLC6A3  | 0.01 Add | 2.76(1.26-6.07) | 1.15E-02 | 2.01E-01 |
| rs16877691 | 5 SLC6A3  | 0.01 Add | 2.76(1.26-6.07) | 1.15E-02 | 2.01E-01 |
| rs11133762 | 5 SLC6A3  | 0.40 Dom | 0.7(0.54-0.9)   | 4.79E-03 | 2.16E-01 |
| rs6347     | 5 SLC6A3  | 0.11 Rec | 1.21(0.32-4.52) | 7.77E-01 | 9.51E-01 |
| rs6869645  | 5 SLC6A3  | 0.02 Add | 1.51(0.81-2.82) | 1.91E-01 | 9.74E-01 |
| rs11564773 | 5 SLC6A3  | 0.02 Add | 1.51(0.8-2.85)  | 2.04E-01 | 9.80E-01 |
| rs456774   | 5 SLC6A3  | 0.47 Rec | 0.99(0.74-1.33) | 9.50E-01 | 9.98E-01 |
| rs3776511  | 5 SLC6A3  | 0.06 Add | 0.84(0.59-1.18) | 3.13E-01 | 9.99E-01 |
| rs3776512  | 5 SLC6A3  | 0.06 Add | 0.84(0.59-1.18) | 3.13E-01 | 9.99E-01 |
| rs10053602 | 5 SLC6A3  | 0.12 Rec | 0.83(0.32-2.18) | 7.05E-01 | 9.99E-01 |
| rs10052016 | 5 SLC6A3  | 0.12 Rec | 0.83(0.32-2.18) | 7.05E-01 | 9.99E-01 |
| rs2078247  | 5 SLC6A3  | 0.12 Rec | 0.48(0.15-1.54) | 2.20E-01 | 9.99E-01 |
| rs8179029  | 5 SLC6A3  | 0.06 Add | 0.85(0.59-1.22) | 3.67E-01 | 1.00E+00 |
| rs3756450  | 5 SLC6A3  | 0.46 Dom | 0.85(0.65-1.11) | 2.23E-01 | 1.00E+00 |
| rs6350     | 5 SLC6A3  | 0.02 Add | 1.33(0.68-2.59) | 4.04E-01 | 1.00E+00 |
| rs456082   | 5 SLC6A3  | 0.48 Dom | 1.06(0.81-1.38) | 6.91E-01 | 1.00E+00 |
| rs11564767 | 5 SLC6A3  | 0.02 Dom | 1.27(0.73-2.21) | 4.02E-01 | 1.00E+00 |
| rs460000   | 5 SLC6A3  | 0.47 Add | 1.01(0.85-1.2)  | 8.93E-01 | 1.00E+00 |
| rs2975226  | 5 SLC6A3  | 0.14 Dom | 1.12(0.84-1.48) | 4.37E-01 | 1.00E+00 |
| rs12654851 | 5 SLC6A3  | 0.46 Dom | 0.87(0.66-1.13) | 2.95E-01 | 1.00E+00 |

|            |          |          |                 |          |          |
|------------|----------|----------|-----------------|----------|----------|
| rs2550956  | 5 SLC6A3 | 0.12 Rec | 0.6(0.21-1.75)  | 3.54E-01 | 1.00E+00 |
| rs10064525 | 5 SLC6A3 | 0.06 Dom | 0.88(0.6-1.29)  | 5.04E-01 | 1.00E+00 |
| rs6413429  | 5 SLC6A3 | 0.02 Add | 1.17(0.6-2.28)  | 6.50E-01 | 1.00E+00 |
| rs2975292  | 5 SLC6A3 | 0.12 Dom | 1.07(0.8-1.43)  | 6.67E-01 | 1.00E+00 |
| rs11133767 | 5 SLC6A3 | 0.08 Dom | 0.92(0.66-1.27) | 6.00E-01 | 1.00E+00 |
| rs11564753 | 5 SLC6A3 | 0.40 Rec | 1.17(0.84-1.63) | 3.42E-01 | 1.00E+00 |
| rs2652511  | 5 SLC6A3 | 0.15 Dom | 1.14(0.87-1.49) | 3.38E-01 | 1.00E+00 |
| rs2937639  | 5 SLC6A3 | 0.14 Rec | 0.62(0.23-1.68) | 3.49E-01 | 1.00E+00 |
| rs2550948  | 5 SLC6A3 | 0.14 Rec | 0.62(0.23-1.68) | 3.49E-01 | 1.00E+00 |
| rs3863145  | 5 SLC6A3 | 0.05 Add | 0.9(0.61-1.32)  | 5.81E-01 | 1.00E+00 |
| rs40358    | 5 SLC6A3 | 0.38 Rec | 0.88(0.62-1.24) | 4.58E-01 | 1.00E+00 |
| rs40184    | 5 SLC6A3 | 0.26 Dom | 1.11(0.87-1.41) | 4.07E-01 | 1.00E+00 |
| rs10040882 | 5 SLC6A3 | 0.12 Add | 1.04(0.8-1.35)  | 7.63E-01 | 1.00E+00 |
| rs2042449  | 5 SLC6A3 | 0.12 Dom | 1.09(0.81-1.45) | 5.84E-01 | 1.00E+00 |
| rs420422   | 5 SLC6A3 | 0.34 Dom | 1.08(0.85-1.37) | 5.44E-01 | 1.00E+00 |
| rs458334   | 5 SLC6A3 | 0.36 Dom | 1.07(0.84-1.37) | 5.66E-01 | 1.00E+00 |
| rs403636   | 5 SLC6A3 | 0.33 Rec | 0.97(0.67-1.42) | 8.83E-01 | 1.00E+00 |
| rs37020    | 5 SLC6A3 | 0.36 Dom | 1.06(0.83-1.36) | 6.13E-01 | 1.00E+00 |
| rs250686   | 5 SLC6A3 | 0.36 Rec | 0.92(0.65-1.31) | 6.44E-01 | 1.00E+00 |
| rs250681   | 5 SLC6A3 | 0.36 Rec | 0.92(0.65-1.31) | 6.44E-01 | 1.00E+00 |
| rs464049   | 5 SLC6A3 | 0.36 Rec | 0.92(0.65-1.31) | 6.44E-01 | 1.00E+00 |
| rs37022    | 5 SLC6A3 | 0.48 Add | 0.96(0.81-1.13) | 6.22E-01 | 1.00E+00 |
| rs2652510  | 5 SLC6A3 | 0.15 Dom | 1.1(0.84-1.44)  | 5.05E-01 | 1.00E+00 |
| rs1042098  | 5 SLC6A3 | 0.07 Add | 0.93(0.67-1.3)  | 6.89E-01 | 1.00E+00 |
| rs12652860 | 5 SLC6A3 | 0.39 Dom | 1.02(0.79-1.31) | 8.80E-01 | 1.00E+00 |
| rs458860   | 5 SLC6A3 | 0.48 Dom | 1.06(0.81-1.39) | 6.52E-01 | 1.00E+00 |
| rs460700   | 5 SLC6A3 | 0.48 Dom | 1.06(0.81-1.39) | 6.52E-01 | 1.00E+00 |
| rs464528   | 5 SLC6A3 | 0.48 Dom | 1.06(0.81-1.39) | 6.52E-01 | 1.00E+00 |
| rs393795   | 5 SLC6A3 | 0.48 Dom | 1.06(0.81-1.39) | 6.52E-01 | 1.00E+00 |
| rs250682   | 5 SLC6A3 | 0.48 Dom | 1.06(0.81-1.39) | 6.52E-01 | 1.00E+00 |
| rs409588   | 5 SLC6A3 | 0.48 Dom | 1.06(0.81-1.39) | 6.52E-01 | 1.00E+00 |
| rs464061   | 5 SLC6A3 | 0.48 Dom | 1.06(0.81-1.39) | 6.52E-01 | 1.00E+00 |
| rs3775443  | 4 SNCA   | 0.20 Rec | 2.13(1.13-3.99) | 1.87E-02 | 3.58E-01 |
| rs3889917  | 4 SNCA   | 0.20 Rec | 2.13(1.13-3.99) | 1.87E-02 | 3.59E-01 |

|            |        |          |                 |          |          |
|------------|--------|----------|-----------------|----------|----------|
| rs10014396 | 4 SNCA | 0.20 Rec | 2.13(1.13-3.99) | 1.87E-02 | 3.59E-01 |
| rs3889916  | 4 SNCA | 0.20 Rec | 2.13(1.13-3.99) | 1.87E-02 | 3.59E-01 |
| rs10002435 | 4 SNCA | 0.20 Rec | 2.13(1.13-3.99) | 1.87E-02 | 3.59E-01 |
| rs7684637  | 4 SNCA | 0.20 Rec | 2.13(1.13-3.99) | 1.87E-02 | 3.59E-01 |
| rs3756056  | 4 SNCA | 0.20 Rec | 2.13(1.13-3.99) | 1.87E-02 | 3.59E-01 |
| rs3906824  | 4 SNCA | 0.20 Rec | 2.13(1.13-3.99) | 1.87E-02 | 3.59E-01 |
| rs3756057  | 4 SNCA | 0.20 Rec | 2.13(1.13-3.99) | 1.87E-02 | 3.59E-01 |
| rs17016168 | 4 SNCA | 0.20 Rec | 2.13(1.13-3.99) | 1.87E-02 | 3.59E-01 |
| rs3775448  | 4 SNCA | 0.20 Rec | 2.13(1.13-3.99) | 1.87E-02 | 3.59E-01 |
| rs2035268  | 4 SNCA | 0.20 Rec | 2.13(1.13-3.99) | 1.87E-02 | 3.59E-01 |
| rs6829514  | 4 SNCA | 0.20 Rec | 2.13(1.13-3.99) | 1.87E-02 | 3.60E-01 |
| rs17016255 | 4 SNCA | 0.20 Rec | 2.13(1.13-3.99) | 1.87E-02 | 3.60E-01 |
| rs3775461  | 4 SNCA | 0.20 Rec | 2.13(1.13-3.99) | 1.87E-02 | 3.60E-01 |
| rs7689942  | 4 SNCA | 0.20 Rec | 2.13(1.13-3.99) | 1.87E-02 | 3.60E-01 |
| rs17016190 | 4 SNCA | 0.20 Rec | 2.13(1.13-3.99) | 1.87E-02 | 3.60E-01 |
| rs17016183 | 4 SNCA | 0.20 Rec | 2.13(1.13-3.99) | 1.87E-02 | 3.60E-01 |
| rs7684892  | 4 SNCA | 0.20 Rec | 2.13(1.13-3.99) | 1.87E-02 | 3.60E-01 |
| rs3775447  | 4 SNCA | 0.20 Rec | 2.13(1.13-3.99) | 1.87E-02 | 3.60E-01 |
| rs3775446  | 4 SNCA | 0.20 Rec | 2.13(1.13-3.99) | 1.87E-02 | 3.61E-01 |
| rs1471483  | 4 SNCA | 0.13 Dom | 0.78(0.59-1.04) | 9.28E-02 | 6.99E-01 |
| rs2737020  | 4 SNCA | 0.33 Rec | 1.44(0.99-2.12) | 5.85E-02 | 7.19E-01 |
| rs1837890  | 4 SNCA | 0.33 Rec | 1.44(0.99-2.12) | 5.85E-02 | 7.19E-01 |
| rs2619372  | 4 SNCA | 0.33 Rec | 1.44(0.99-2.12) | 5.85E-02 | 7.19E-01 |
| rs974711   | 4 SNCA | 0.33 Rec | 1.44(0.99-2.12) | 5.85E-02 | 7.19E-01 |
| rs1442143  | 4 SNCA | 0.33 Rec | 1.44(0.99-2.12) | 5.85E-02 | 7.20E-01 |
| rs2583978  | 4 SNCA | 0.13 Dom | 0.79(0.59-1.05) | 1.07E-01 | 7.45E-01 |
| rs2619356  | 4 SNCA | 0.13 Dom | 0.79(0.59-1.05) | 1.07E-01 | 7.46E-01 |
| rs2583968  | 4 SNCA | 0.13 Dom | 0.79(0.59-1.05) | 1.07E-01 | 7.46E-01 |
| rs2583979  | 4 SNCA | 0.13 Dom | 0.79(0.59-1.05) | 1.07E-01 | 7.46E-01 |
| rs2583975  | 4 SNCA | 0.13 Dom | 0.79(0.59-1.05) | 1.07E-01 | 7.46E-01 |
| rs2619355  | 4 SNCA | 0.13 Dom | 0.79(0.59-1.05) | 1.07E-01 | 7.46E-01 |
| rs3113355  | 4 SNCA | 0.13 Dom | 0.79(0.59-1.05) | 1.07E-01 | 7.46E-01 |
| rs1811442  | 4 SNCA | 0.13 Dom | 0.79(0.59-1.05) | 1.07E-01 | 7.47E-01 |
| rs1471484  | 4 SNCA | 0.13 Dom | 0.79(0.59-1.06) | 1.13E-01 | 7.62E-01 |

|            |        |          |                 |          |          |
|------------|--------|----------|-----------------|----------|----------|
| rs1372519  | 4 SNCA | 0.13 Dom | 0.8(0.6-1.06)   | 1.22E-01 | 7.66E-01 |
| rs1372522  | 4 SNCA | 0.13 Dom | 0.8(0.6-1.06)   | 1.22E-01 | 7.67E-01 |
| rs7681440  | 4 SNCA | 0.13 Dom | 0.8(0.6-1.06)   | 1.22E-01 | 7.67E-01 |
| rs2301134  | 4 SNCA | 0.13 Dom | 0.8(0.6-1.06)   | 1.22E-01 | 7.67E-01 |
| rs7687945  | 4 SNCA | 0.13 Dom | 0.8(0.6-1.06)   | 1.22E-01 | 7.67E-01 |
| rs1837891  | 4 SNCA | 0.13 Rec | 2.19(0.92-5.2)  | 7.70E-02 | 7.71E-01 |
| rs10005233 | 4 SNCA | 0.13 Rec | 2.19(0.92-5.2)  | 7.70E-02 | 7.71E-01 |
| rs1442144  | 4 SNCA | 0.13 Rec | 2.21(0.9-5.46)  | 8.43E-02 | 7.73E-01 |
| rs1812923  | 4 SNCA | 0.33 Rec | 1.42(0.97-2.07) | 7.11E-02 | 7.77E-01 |
| rs356191   | 4 SNCA | 0.14 Rec | 2.07(0.9-4.75)  | 8.56E-02 | 7.80E-01 |
| rs356188   | 4 SNCA | 0.14 Rec | 2.07(0.9-4.75)  | 8.56E-02 | 7.80E-01 |
| rs6532191  | 4 SNCA | 0.13 Dom | 0.78(0.59-1.04) | 8.94E-02 | 8.03E-01 |
| rs10011157 | 4 SNCA | 0.12 Rec | 2.07(0.86-4.97) | 1.04E-01 | 8.12E-01 |
| rs2572318  | 4 SNCA | 0.13 Rec | 1.96(0.85-4.53) | 1.16E-01 | 8.22E-01 |
| rs2197120  | 4 SNCA | 0.13 Rec | 1.96(0.85-4.53) | 1.16E-01 | 8.22E-01 |
| rs2619368  | 4 SNCA | 0.13 Rec | 1.96(0.85-4.53) | 1.16E-01 | 8.22E-01 |
| rs356186   | 4 SNCA | 0.13 Rec | 1.96(0.85-4.53) | 1.16E-01 | 8.22E-01 |
| rs3775439  | 4 SNCA | 0.46 Add | 0.89(0.75-1.06) | 1.80E-01 | 8.81E-01 |
| rs3822090  | 4 SNCA | 0.46 Add | 0.89(0.75-1.06) | 1.80E-01 | 8.81E-01 |
| rs3775429  | 4 SNCA | 0.07 Dom | 0.8(0.56-1.15)  | 2.35E-01 | 8.82E-01 |
| rs356164   | 4 SNCA | 0.07 Dom | 0.82(0.58-1.17) | 2.70E-01 | 9.03E-01 |
| rs17016188 | 4 SNCA | 0.34 Rec | 1.08(0.74-1.58) | 6.96E-01 | 9.06E-01 |
| rs6834765  | 4 SNCA | 0.46 Add | 0.9(0.76-1.06)  | 2.09E-01 | 9.13E-01 |
| rs7690873  | 4 SNCA | 0.46 Add | 0.9(0.76-1.06)  | 2.09E-01 | 9.13E-01 |
| rs3796661  | 4 SNCA | 0.46 Add | 0.9(0.76-1.06)  | 2.09E-01 | 9.13E-01 |
| rs10516845 | 4 SNCA | 0.46 Add | 0.9(0.76-1.06)  | 2.09E-01 | 9.13E-01 |
| rs2737029  | 4 SNCA | 0.46 Dom | 0.83(0.64-1.08) | 1.62E-01 | 9.13E-01 |
| rs3775450  | 4 SNCA | 0.34 Rec | 1.1(0.75-1.61)  | 6.32E-01 | 9.28E-01 |
| rs3775423  | 4 SNCA | 0.47 Rec | 0.88(0.66-1.18) | 3.86E-01 | 9.28E-01 |
| rs17016235 | 4 SNCA | 0.34 Rec | 1.09(0.75-1.59) | 6.64E-01 | 9.39E-01 |
| rs356198   | 4 SNCA | 0.08 Dom | 0.84(0.6-1.19)  | 3.35E-01 | 9.48E-01 |
| rs8180209  | 4 SNCA | 0.47 Rec | 0.89(0.67-1.19) | 4.39E-01 | 9.57E-01 |
| rs3857057  | 4 SNCA | 0.47 Rec | 0.89(0.67-1.19) | 4.39E-01 | 9.57E-01 |
| rs356220   | 4 SNCA | 0.47 Rec | 0.89(0.67-1.19) | 4.39E-01 | 9.57E-01 |

|            |        |          |                 |          |          |
|------------|--------|----------|-----------------|----------|----------|
| rs3857051  | 4 SNCA | 0.47 Rec | 0.89(0.67-1.19) | 4.39E-01 | 9.57E-01 |
| rs3775424  | 4 SNCA | 0.47 Rec | 0.89(0.67-1.19) | 4.39E-01 | 9.57E-01 |
| rs7661330  | 4 SNCA | 0.46 Rec | 0.89(0.67-1.19) | 4.39E-01 | 9.57E-01 |
| rs10033209 | 4 SNCA | 0.47 Rec | 0.89(0.67-1.19) | 4.39E-01 | 9.57E-01 |
| rs8180214  | 4 SNCA | 0.47 Rec | 0.89(0.67-1.19) | 4.39E-01 | 9.57E-01 |
| rs3857052  | 4 SNCA | 0.47 Rec | 0.89(0.67-1.19) | 4.39E-01 | 9.57E-01 |
| rs10003708 | 4 SNCA | 0.47 Rec | 0.89(0.67-1.19) | 4.39E-01 | 9.57E-01 |
| rs3756054  | 4 SNCA | 0.47 Rec | 0.89(0.67-1.19) | 4.39E-01 | 9.57E-01 |
| rs7436973  | 4 SNCA | 0.47 Rec | 0.89(0.67-1.19) | 4.39E-01 | 9.57E-01 |
| rs7675290  | 4 SNCA | 0.47 Rec | 0.89(0.67-1.19) | 4.39E-01 | 9.57E-01 |
| rs7655792  | 4 SNCA | 0.47 Rec | 0.89(0.67-1.19) | 4.39E-01 | 9.57E-01 |
| rs3857059  | 4 SNCA | 0.47 Rec | 0.89(0.67-1.19) | 4.39E-01 | 9.57E-01 |
| rs17016071 | 4 SNCA | 0.47 Rec | 0.89(0.67-1.19) | 4.39E-01 | 9.57E-01 |
| rs11931074 | 4 SNCA | 0.47 Rec | 0.89(0.67-1.19) | 4.39E-01 | 9.57E-01 |
| rs11097234 | 4 SNCA | 0.33 Add | 0.94(0.78-1.12) | 4.65E-01 | 9.69E-01 |
| rs12502363 | 4 SNCA | 0.33 Add | 0.94(0.78-1.12) | 4.65E-01 | 9.70E-01 |
| rs10155475 | 4 SNCA | 0.33 Add | 0.94(0.78-1.12) | 4.70E-01 | 9.71E-01 |
| rs3822095  | 4 SNCA | 0.33 Add | 0.94(0.78-1.12) | 4.70E-01 | 9.71E-01 |
| rs7356228  | 4 SNCA | 0.33 Add | 0.94(0.78-1.12) | 4.70E-01 | 9.71E-01 |
| rs11097238 | 4 SNCA | 0.33 Add | 0.94(0.78-1.12) | 4.70E-01 | 9.71E-01 |
| rs7356297  | 4 SNCA | 0.33 Add | 0.94(0.78-1.12) | 4.70E-01 | 9.71E-01 |
| rs3910104  | 4 SNCA | 0.32 Dom | 0.92(0.72-1.17) | 5.00E-01 | 9.71E-01 |
| rs17795208 | 4 SNCA | 0.06 Dom | 0.92(0.64-1.34) | 6.80E-01 | 9.73E-01 |
| rs356168   | 4 SNCA | 0.40 Rec | 0.89(0.65-1.23) | 4.92E-01 | 9.75E-01 |
| rs356221   | 4 SNCA | 0.40 Rec | 0.89(0.65-1.23) | 4.92E-01 | 9.75E-01 |
| rs356200   | 4 SNCA | 0.40 Rec | 0.89(0.65-1.23) | 4.92E-01 | 9.75E-01 |
| rs2736990  | 4 SNCA | 0.40 Rec | 0.89(0.65-1.23) | 4.92E-01 | 9.75E-01 |
| rs356204   | 4 SNCA | 0.40 Rec | 0.89(0.65-1.23) | 4.92E-01 | 9.75E-01 |
| rs356203   | 4 SNCA | 0.46 Rec | 0.91(0.68-1.22) | 5.40E-01 | 9.75E-01 |
| rs6848726  | 4 SNCA | 0.33 Add | 0.94(0.78-1.12) | 4.95E-01 | 9.78E-01 |
| rs2119787  | 4 SNCA | 0.33 Add | 0.94(0.78-1.12) | 4.95E-01 | 9.78E-01 |
| rs3796664  | 4 SNCA | 0.33 Add | 0.94(0.78-1.12) | 4.95E-01 | 9.78E-01 |
| rs7681815  | 4 SNCA | 0.46 Rec | 0.92(0.68-1.23) | 5.52E-01 | 9.78E-01 |
| rs7681312  | 4 SNCA | 0.46 Rec | 0.92(0.68-1.23) | 5.52E-01 | 9.78E-01 |

|            |        |          |                 |          |          |
|------------|--------|----------|-----------------|----------|----------|
| rs356219   | 4 SNCA | 0.46 Rec | 0.92(0.68-1.23) | 5.52E-01 | 9.78E-01 |
| rs356165   | 4 SNCA | 0.46 Rec | 0.92(0.68-1.23) | 5.52E-01 | 9.78E-01 |
| rs3822091  | 4 SNCA | 0.34 Add | 1.03(0.86-1.24) | 7.12E-01 | 9.86E-01 |
| rs3822088  | 4 SNCA | 0.34 Add | 1.03(0.86-1.24) | 7.12E-01 | 9.86E-01 |
| rs3775438  | 4 SNCA | 0.34 Add | 1.03(0.86-1.24) | 7.12E-01 | 9.86E-01 |
| rs3898322  | 4 SNCA | 0.34 Add | 1.03(0.86-1.24) | 7.12E-01 | 9.86E-01 |
| rs3729594  | 4 SNCA | 0.34 Add | 1.03(0.86-1.24) | 7.12E-01 | 9.86E-01 |
| rs961386   | 4 SNCA | 0.34 Add | 1.03(0.86-1.24) | 7.11E-01 | 9.86E-01 |
| rs10009760 | 4 SNCA | 0.33 Add | 0.94(0.79-1.13) | 5.35E-01 | 9.86E-01 |
| rs2870028  | 4 SNCA | 0.33 Add | 0.94(0.79-1.13) | 5.35E-01 | 9.86E-01 |
| rs3775444  | 4 SNCA | 0.34 Dom | 1.02(0.8-1.3)   | 8.56E-01 | 9.88E-01 |
| rs894278   | 4 SNCA | 0.34 Dom | 1.02(0.8-1.3)   | 8.56E-01 | 9.88E-01 |
| rs3775442  | 4 SNCA | 0.34 Dom | 1.02(0.8-1.3)   | 8.56E-01 | 9.88E-01 |
| rs6532190  | 4 SNCA | 0.34 Dom | 1.02(0.8-1.3)   | 8.56E-01 | 9.88E-01 |
| rs10516847 | 4 SNCA | 0.34 Dom | 1.02(0.8-1.3)   | 8.56E-01 | 9.88E-01 |
| rs17016193 | 4 SNCA | 0.34 Dom | 1.02(0.8-1.3)   | 8.56E-01 | 9.88E-01 |
| rs17033763 | 4 TDO2 | 0.10 Rec | 0.3(0.08-1.13)  | 7.51E-02 | 6.90E-01 |
| rs17379906 | 4 TDO2 | 0.10 Rec | 0.3(0.08-1.13)  | 7.51E-02 | 6.90E-01 |
| rs3796551  | 4 TDO2 | 0.08 Dom | 1.24(0.89-1.72) | 1.98E-01 | 8.63E-01 |
| rs13128945 | 4 TDO2 | 0.03 Add | 0.97(0.58-1.63) | 9.05E-01 | 9.05E-01 |
| rs10857287 | 4 TDO2 | 0.08 Dom | 1.2(0.87-1.67)  | 2.69E-01 | 9.40E-01 |
| rs13125676 | 4 TDO2 | 0.08 Dom | 1.2(0.86-1.67)  | 2.74E-01 | 9.43E-01 |
| rs2878125  | 4 TDO2 | 0.10 Add | 1.18(0.88-1.59) | 2.59E-01 | 9.51E-01 |
| rs6817205  | 4 TDO2 | 0.04 Add | 1.27(0.83-1.97) | 2.72E-01 | 9.52E-01 |
| rs10517626 | 4 TDO2 | 0.10 Add | 1.18(0.88-1.59) | 2.66E-01 | 9.53E-01 |
| rs12502494 | 4 TDO2 | 0.10 Add | 1.18(0.88-1.59) | 2.66E-01 | 9.53E-01 |
| rs2271538  | 4 TDO2 | 0.04 Dom | 1.05(0.69-1.6)  | 8.07E-01 | 9.62E-01 |
| rs6856558  | 4 TDO2 | 0.19 Add | 0.88(0.71-1.1)  | 2.65E-01 | 9.63E-01 |
| rs13434811 | 4 TDO2 | 0.04 Add | 1.24(0.8-1.93)  | 3.29E-01 | 9.74E-01 |
| rs13152449 | 4 TDO2 | 0.04 Add | 1.24(0.8-1.93)  | 3.29E-01 | 9.74E-01 |
| rs10020753 | 4 TDO2 | 0.04 Add | 1.24(0.8-1.93)  | 3.29E-01 | 9.74E-01 |
| rs3755907  | 4 TDO2 | 0.08 Dom | 1.16(0.83-1.62) | 3.76E-01 | 9.76E-01 |
| rs2292536  | 4 TDO2 | 0.22 Dom | 0.9(0.7-1.15)   | 3.87E-01 | 9.78E-01 |
| rs3775085  | 4 TDO2 | 0.08 Dom | 1.14(0.82-1.59) | 4.23E-01 | 9.84E-01 |

|            |        |          |                 |          |          |
|------------|--------|----------|-----------------|----------|----------|
| rs17033799 | 4 TDO2 | 0.01 Add | 0.73(0.31-1.7)  | 4.65E-01 | 9.86E-01 |
| rs2271537  | 4 TDO2 | 0.26 Rec | 0.85(0.51-1.42) | 5.44E-01 | 9.86E-01 |
| rs16998970 | 4 TDO2 | 0.06 Add | 1.12(0.77-1.63) | 5.64E-01 | 9.91E-01 |
| rs11723579 | 4 TDO2 | 0.25 Rec | 0.77(0.45-1.3)  | 3.23E-01 | 9.93E-01 |
| rs1543108  | 4 TDO2 | 0.05 Add | 0.89(0.6-1.31)  | 5.41E-01 | 9.93E-01 |
| rs2292537  | 4 TDO2 | 0.03 Add | 0.86(0.53-1.4)  | 5.55E-01 | 9.93E-01 |
| rs9044     | 4 TDO2 | 0.24 Add | 0.94(0.77-1.15) | 5.52E-01 | 9.94E-01 |
| rs3755910  | 4 TDO2 | 0.04 Dom | 1.08(0.71-1.65) | 7.16E-01 | 9.95E-01 |
| rs6856354  | 4 TDO2 | 0.30 Rec | 0.85(0.55-1.32) | 4.65E-01 | 9.97E-01 |
| rs10840489 | 11 TH  | 0.11 Dom | 1.31(0.98-1.76) | 7.03E-02 | 8.31E-01 |
| rs6356     | 11 TH  | 0.18 Dom | 1.24(0.96-1.6)  | 9.32E-02 | 8.99E-01 |
| rs10770140 | 11 TH  | 0.07 Add | 1(0.73-1.38)    | 9.87E-01 | 9.87E-01 |
| rs11564710 | 11 TH  | 0.21 Dom | 1.13(0.89-1.45) | 3.16E-01 | 9.94E-01 |
| rs7924316  | 11 TH  | 0.41 Rec | 0.82(0.59-1.14) | 2.42E-01 | 9.98E-01 |
| rs10770141 | 11 TH  | 0.06 Add | 0.97(0.68-1.37) | 8.53E-01 | 9.98E-01 |
| rs7482891  | 11 TH  | 0.08 Add | 0.96(0.71-1.31) | 8.11E-01 | 9.98E-01 |
| rs10840495 | 11 TH  | 0.06 Add | 0.96(0.67-1.37) | 8.12E-01 | 9.99E-01 |
| rs7115640  | 11 TH  | 0.06 Add | 0.96(0.67-1.37) | 8.12E-01 | 9.99E-01 |
| rs7119275  | 11 TH  | 0.06 Add | 0.96(0.67-1.37) | 8.12E-01 | 9.99E-01 |
| rs4930046  | 11 TH  | 0.18 Rec | 0.73(0.36-1.47) | 3.71E-01 | 9.99E-01 |
| rs11043016 | 11 TH  | 0.09 Dom | 1.11(0.81-1.52) | 5.24E-01 | 9.99E-01 |
| rs11042978 | 11 TH  | 0.19 Dom | 1.11(0.86-1.43) | 4.16E-01 | 9.99E-01 |
| rs4320932  | 11 TH  | 0.44 Rec | 0.86(0.63-1.16) | 3.29E-01 | 9.99E-01 |
| rs11564708 | 11 TH  | 0.04 Add | 1.18(0.75-1.86) | 4.84E-01 | 9.99E-01 |
| rs7396243  | 11 TH  | 0.23 Rec | 0.77(0.44-1.36) | 3.64E-01 | 9.99E-01 |
| rs10840490 | 11 TH  | 0.12 Add | 1.12(0.86-1.44) | 3.99E-01 | 9.99E-01 |
| rs10743149 | 11 TH  | 0.03 Add | 0.99(0.61-1.61) | 9.79E-01 | 9.99E-01 |
| rs11043007 | 11 TH  | 0.21 Rec | 0.77(0.42-1.4)  | 3.87E-01 | 9.99E-01 |
| rs2070762  | 11 TH  | 0.42 Rec | 0.85(0.62-1.16) | 3.04E-01 | 9.99E-01 |
| rs10840491 | 11 TH  | 0.12 Add | 1.11(0.86-1.44) | 4.15E-01 | 1.00E+00 |
| rs1004446  | 11 TH  | 0.29 Dom | 0.88(0.69-1.13) | 3.15E-01 | 1.00E+00 |
| rs6578993  | 11 TH  | 0.11 Rec | 0.72(0.23-2.26) | 5.78E-01 | 1.00E+00 |
| rs11564705 | 11 TH  | 0.07 Add | 0.94(0.68-1.3)  | 7.16E-01 | 1.00E+00 |
| rs3842748  | 11 TH  | 0.03 Dom | 0.89(0.54-1.5)  | 6.72E-01 | 1.00E+00 |

|            |       |          |                 |          |          |
|------------|-------|----------|-----------------|----------|----------|
| rs11043001 | 11 TH | 0.14 Add | 1.05(0.82-1.34) | 6.98E-01 | 1.00E+00 |
| rs11564707 | 11 TH | 0.08 Add | 0.95(0.69-1.31) | 7.51E-01 | 1.00E+00 |
| rs7129483  | 11 TH | 0.08 Add | 0.95(0.69-1.31) | 7.51E-01 | 1.00E+00 |
| rs11043003 | 11 TH | 0.08 Add | 0.95(0.69-1.31) | 7.51E-01 | 1.00E+00 |
| rs11564703 | 11 TH | 0.22 Rec | 0.8(0.44-1.45)  | 4.68E-01 | 1.00E+00 |
| rs4929966  | 11 TH | 0.03 Add | 0.93(0.58-1.51) | 7.82E-01 | 1.00E+00 |
| rs11042982 | 11 TH | 0.12 Dom | 1.1(0.83-1.46)  | 5.19E-01 | 1.00E+00 |

Web Table3B: Association of SNPs in dopamine pathway with smoking initiation in WSPT (Females)

| SNP        | Chr | Gene    | maf  | model | OR.CI           | p        | p.act2   |
|------------|-----|---------|------|-------|-----------------|----------|----------|
| rs8192595  | 18  | ADCYAP1 | 0.09 | Add   | 0.67(0.43-1.04) | 7.27E-02 | 7.12E-01 |
| rs11663363 | 18  | ADCYAP1 | 0.03 | Add   | 0.57(0.26-1.24) | 1.55E-01 | 8.76E-01 |
| rs2846584  | 18  | ADCYAP1 | 0.31 | Add   | 0.81(0.63-1.04) | 9.48E-02 | 9.42E-01 |
| rs17500692 | 18  | ADCYAP1 | 0.27 | Rec   | 0.58(0.3-1.14)  | 1.14E-01 | 9.51E-01 |
| rs7242260  | 18  | ADCYAP1 | 0.27 | Rec   | 0.58(0.3-1.14)  | 1.14E-01 | 9.51E-01 |
| rs11081461 | 18  | ADCYAP1 | 0.38 | Dom   | 1.04(0.75-1.45) | 8.26E-01 | 9.69E-01 |
| rs7228988  | 18  | ADCYAP1 | 0.08 | Dom   | 0.75(0.47-1.22) | 2.48E-01 | 9.73E-01 |
| rs2846583  | 18  | ADCYAP1 | 0.31 | Rec   | 0.66(0.36-1.2)  | 1.74E-01 | 9.90E-01 |
| rs1599789  | 18  | ADCYAP1 | 0.21 | Dom   | 1.26(0.91-1.74) | 1.68E-01 | 9.93E-01 |
| rs4798684  | 18  | ADCYAP1 | 0.20 | Dom   | 1.21(0.87-1.67) | 2.59E-01 | 9.94E-01 |
| rs10775442 | 18  | ADCYAP1 | 0.20 | Dom   | 1.21(0.87-1.67) | 2.59E-01 | 9.94E-01 |
| rs4797328  | 18  | ADCYAP1 | 0.21 | Dom   | 1.25(0.9-1.74)  | 1.76E-01 | 9.95E-01 |
| rs7241142  | 18  | ADCYAP1 | 0.21 | Dom   | 1.25(0.9-1.74)  | 1.76E-01 | 9.95E-01 |
| rs10853365 | 18  | ADCYAP1 | 0.21 | Dom   | 1.25(0.9-1.74)  | 1.76E-01 | 9.95E-01 |
| rs2040177  | 18  | ADCYAP1 | 0.49 | Rec   | 0.77(0.52-1.14) | 1.88E-01 | 9.95E-01 |
| rs17579719 | 18  | ADCYAP1 | 0.08 | Dom   | 0.79(0.49-1.28) | 3.46E-01 | 9.95E-01 |
| rs2846807  | 18  | ADCYAP1 | 0.46 | Dom   | 1.25(0.87-1.8)  | 2.19E-01 | 9.96E-01 |
| rs17501755 | 18  | ADCYAP1 | 0.14 | Dom   | 0.84(0.58-1.22) | 3.59E-01 | 9.96E-01 |
| rs17501915 | 18  | ADCYAP1 | 0.14 | Dom   | 0.84(0.58-1.22) | 3.59E-01 | 9.96E-01 |
| rs4797325  | 18  | ADCYAP1 | 0.49 | Rec   | 0.78(0.53-1.14) | 1.97E-01 | 9.96E-01 |
| rs1916610  | 18  | ADCYAP1 | 0.49 | Rec   | 0.77(0.52-1.14) | 1.97E-01 | 9.96E-01 |
| rs11663168 | 18  | ADCYAP1 | 0.03 | Add   | 0.74(0.37-1.47) | 3.82E-01 | 9.96E-01 |
| rs11660066 | 18  | ADCYAP1 | 0.24 | Dom   | 1.2(0.87-1.66)  | 2.70E-01 | 9.96E-01 |
| rs9635870  | 18  | ADCYAP1 | 0.46 | Dom   | 1.23(0.86-1.76) | 2.56E-01 | 9.96E-01 |



|            |               |          |                 |          |          |
|------------|---------------|----------|-----------------|----------|----------|
| rs12968039 | 18 ADCYAP1    | 0.20 Dom | 1.22(0.88-1.7)  | 2.28E-01 | 9.96E-01 |
| rs2846578  | 18 ADCYAP1    | 0.32 Rec | 0.76(0.43-1.36) | 3.54E-01 | 9.96E-01 |
| rs16952813 | 18 ADCYAP1    | 0.24 Add | 1.16(0.89-1.52) | 2.67E-01 | 9.97E-01 |
| rs2846581  | 18 ADCYAP1    | 0.31 Rec | 0.71(0.39-1.28) | 2.50E-01 | 9.97E-01 |
| rs11081411 | 18 ADCYAP1    | 0.20 Dom | 1.22(0.88-1.69) | 2.38E-01 | 9.97E-01 |
| rs9957039  | 18 ADCYAP1    | 0.41 Dom | 1.19(0.85-1.68) | 3.15E-01 | 9.97E-01 |
| rs11659736 | 18 ADCYAP1    | 0.24 Add | 0.87(0.67-1.15) | 3.34E-01 | 9.97E-01 |
| rs11877293 | 18 ADCYAP1    | 0.49 Rec | 0.8(0.54-1.17)  | 2.52E-01 | 9.97E-01 |
| rs11665625 | 18 ADCYAP1    | 0.41 Dom | 1.17(0.83-1.64) | 3.72E-01 | 9.97E-01 |
| rs12967004 | 18 ADCYAP1    | 0.22 Rec | 0.67(0.29-1.56) | 3.48E-01 | 9.98E-01 |
| rs12961210 | 18 ADCYAP1    | 0.22 Rec | 0.67(0.29-1.56) | 3.48E-01 | 9.98E-01 |
| rs6506614  | 18 ADCYAP1    | 0.31 Rec | 0.79(0.44-1.44) | 4.46E-01 | 9.99E-01 |
| rs8093310  | 18 ADCYAP1    | 0.31 Rec | 0.79(0.44-1.44) | 4.46E-01 | 9.99E-01 |
| rs11081414 | 18 ADCYAP1    | 0.31 Rec | 0.79(0.44-1.44) | 4.46E-01 | 9.99E-01 |
| rs940196   | 18 ADCYAP1    | 0.04 Add | 0.99(0.54-1.8)  | 9.64E-01 | 9.99E-01 |
| rs12608148 | 18 ADCYAP1    | 0.31 Rec | 0.8(0.44-1.46)  | 4.76E-01 | 9.99E-01 |
| rs4798767  | 18 ADCYAP1    | 0.47 Rec | 0.91(0.62-1.34) | 6.29E-01 | 1.00E+00 |
| rs11663172 | 18 ADCYAP1    | 0.38 Add | 1.01(0.79-1.28) | 9.57E-01 | 1.00E+00 |
| rs10853372 | 18 ADCYAP1    | 0.49 Dom | 0.97(0.67-1.39) | 8.56E-01 | 1.00E+00 |
| rs12373400 | 18 ADCYAP1    | 0.38 Rec | 0.99(0.62-1.57) | 9.52E-01 | 1.00E+00 |
| rs4245147  | 11 ANKK1_DRD2 | 0.17 Add | 1.56(1.18-2.07) | 1.68E-03 | 1.15E-01 |
| rs4274224  | 11 ANKK1_DRD2 | 0.17 Add | 1.56(1.18-2.07) | 1.68E-03 | 1.15E-01 |
| rs4936271  | 11 ANKK1_DRD2 | 0.17 Add | 1.56(1.18-2.07) | 1.68E-03 | 1.16E-01 |
| rs4245146  | 11 ANKK1_DRD2 | 0.17 Add | 1.56(1.18-2.07) | 1.68E-03 | 1.16E-01 |
| rs4936274  | 11 ANKK1_DRD2 | 0.11 Dom | 1.8(1.24-2.61)  | 2.07E-03 | 1.39E-01 |
| rs11214613 | 11 ANKK1_DRD2 | 0.11 Dom | 1.8(1.24-2.61)  | 2.07E-03 | 1.40E-01 |
| rs17601612 | 11 ANKK1_DRD2 | 0.03 Add | 2.33(1.32-4.12) | 3.56E-03 | 1.42E-01 |
| rs11601054 | 11 ANKK1_DRD2 | 0.02 Add | 2.36(1.28-4.36) | 6.12E-03 | 2.26E-01 |
| rs4630328  | 11 ANKK1_DRD2 | 0.03 Add | 2.03(1.15-3.57) | 1.47E-02 | 3.95E-01 |
| rs6589377  | 11 ANKK1_DRD2 | 0.03 Add | 1.84(1.04-3.25) | 3.72E-02 | 6.56E-01 |
| rs4460839  | 11 ANKK1_DRD2 | 0.14 Dom | 1.5(1.06-2.14)  | 2.31E-02 | 6.56E-01 |
| rs4245148  | 11 ANKK1_DRD2 | 0.14 Dom | 1.5(1.05-2.14)  | 2.40E-02 | 6.57E-01 |
| rs4581480  | 11 ANKK1_DRD2 | 0.14 Dom | 1.5(1.05-2.13)  | 2.48E-02 | 6.65E-01 |
| rs4936270  | 11 ANKK1_DRD2 | 0.14 Dom | 1.48(1.04-2.1)  | 3.03E-02 | 7.25E-01 |
| rs10891549 | 11 ANKK1_DRD2 | 0.06 Add | 1.41(0.93-2.13) | 1.07E-01 | 9.16E-01 |
| rs7131056  | 11 ANKK1_DRD2 | 0.43 Dom | 1.39(0.97-1.99) | 7.37E-02 | 9.21E-01 |
| rs7122454  | 11 ANKK1_DRD2 | 0.38 Rec | 0.65(0.39-1.06) | 8.57E-02 | 9.28E-01 |

|            |               |          |                 |          |          |
|------------|---------------|----------|-----------------|----------|----------|
| rs2734849  | 11 ANKK1_DRD2 | 0.06 Add | 1.4(0.91-2.14)  | 1.24E-01 | 9.31E-01 |
| rs6277     | 11 ANKK1_DRD2 | 0.06 Add | 1.39(0.91-2.11) | 1.31E-01 | 9.41E-01 |
| rs1554929  | 11 ANKK1_DRD2 | 0.06 Add | 1.37(0.9-2.1)   | 1.40E-01 | 9.52E-01 |
| rs11604671 | 11 ANKK1_DRD2 | 0.06 Add | 1.37(0.89-2.1)  | 1.58E-01 | 9.58E-01 |
| rs4648317  | 11 ANKK1_DRD2 | 0.38 Dom | 0.81(0.59-1.12) | 2.03E-01 | 9.59E-01 |
| rs1799978  | 11 ANKK1_DRD2 | 0.20 Rec | 0.56(0.23-1.39) | 2.12E-01 | 9.59E-01 |
| rs10891551 | 11 ANKK1_DRD2 | 0.38 Dom | 0.81(0.59-1.12) | 2.03E-01 | 9.59E-01 |
| rs17529477 | 11 ANKK1_DRD2 | 0.03 Add | 1.51(0.82-2.8)  | 1.86E-01 | 9.60E-01 |
| rs12360992 | 11 ANKK1_DRD2 | 0.06 Add | 1.35(0.88-2.08) | 1.72E-01 | 9.61E-01 |
| rs11214596 | 11 ANKK1_DRD2 | 0.06 Add | 1.35(0.88-2.08) | 1.72E-01 | 9.61E-01 |
| rs2245805  | 11 ANKK1_DRD2 | 0.48 Add | 1(0.79-1.25)    | 9.71E-01 | 9.71E-01 |
| rs12364051 | 11 ANKK1_DRD2 | 0.06 Add | 1.34(0.87-2.05) | 1.87E-01 | 9.71E-01 |
| rs11214611 | 11 ANKK1_DRD2 | 0.38 Add | 0.83(0.66-1.05) | 1.24E-01 | 9.73E-01 |
| rs2734839  | 11 ANKK1_DRD2 | 0.06 Add | 1.33(0.85-2.08) | 2.06E-01 | 9.74E-01 |
| rs2734837  | 11 ANKK1_DRD2 | 0.06 Add | 1.33(0.85-2.08) | 2.06E-01 | 9.74E-01 |
| rs4938019  | 11 ANKK1_DRD2 | 0.36 Rec | 0.75(0.46-1.23) | 2.56E-01 | 9.74E-01 |
| rs2734838  | 11 ANKK1_DRD2 | 0.06 Add | 1.33(0.85-2.08) | 2.06E-01 | 9.74E-01 |
| rs4350392  | 11 ANKK1_DRD2 | 0.36 Rec | 0.75(0.46-1.23) | 2.56E-01 | 9.75E-01 |
| rs7122246  | 11 ANKK1_DRD2 | 0.06 Add | 1.32(0.86-2.03) | 2.08E-01 | 9.77E-01 |
| rs877137   | 11 ANKK1_DRD2 | 0.05 Add | 1.34(0.8-2.25)  | 2.73E-01 | 9.80E-01 |
| rs1116313  | 11 ANKK1_DRD2 | 0.06 Add | 1.32(0.85-2.06) | 2.23E-01 | 9.81E-01 |
| rs1076563  | 11 ANKK1_DRD2 | 0.06 Add | 1.32(0.85-2.06) | 2.23E-01 | 9.81E-01 |
| rs4587762  | 11 ANKK1_DRD2 | 0.06 Add | 1.31(0.85-2.01) | 2.23E-01 | 9.82E-01 |
| rs11214589 | 11 ANKK1_DRD2 | 0.05 Dom | 1.35(0.8-2.26)  | 2.60E-01 | 9.82E-01 |
| rs7107223  | 11 ANKK1_DRD2 | 0.05 Dom | 1.32(0.79-2.19) | 2.85E-01 | 9.83E-01 |
| rs10891552 | 11 ANKK1_DRD2 | 0.36 Rec | 0.76(0.46-1.26) | 2.88E-01 | 9.85E-01 |
| rs754672   | 11 ANKK1_DRD2 | 0.06 Dom | 1.31(0.79-2.17) | 2.95E-01 | 9.85E-01 |
| rs2734833  | 11 ANKK1_DRD2 | 0.07 Add | 1.28(0.84-1.94) | 2.52E-01 | 9.85E-01 |
| rs2734848  | 11 ANKK1_DRD2 | 0.04 Add | 0.72(0.39-1.35) | 3.08E-01 | 9.88E-01 |
| rs7131440  | 11 ANKK1_DRD2 | 0.05 Add | 1.27(0.77-2.1)  | 3.40E-01 | 9.92E-01 |
| rs4938017  | 11 ANKK1_DRD2 | 0.05 Add | 1.27(0.77-2.1)  | 3.40E-01 | 9.92E-01 |
| rs1076562  | 11 ANKK1_DRD2 | 0.48 Add | 1(0.79-1.25)    | 9.71E-01 | 9.94E-01 |
| rs2440390  | 11 ANKK1_DRD2 | 0.04 Add | 0.74(0.4-1.39)  | 3.51E-01 | 9.95E-01 |
| rs2002453  | 11 ANKK1_DRD2 | 0.48 Add | 1(0.79-1.25)    | 9.69E-01 | 9.97E-01 |
| rs1124492  | 11 ANKK1_DRD2 | 0.49 Rec | 0.94(0.65-1.37) | 7.55E-01 | 9.98E-01 |
| rs12800853 | 11 ANKK1_DRD2 | 0.06 Dom | 1.26(0.76-2.09) | 3.72E-01 | 9.98E-01 |
| rs2471851  | 11 ANKK1_DRD2 | 0.37 Rec | 0.76(0.46-1.23) | 2.64E-01 | 9.99E-01 |

|            |               |          |                 |          |          |
|------------|---------------|----------|-----------------|----------|----------|
| rs7350522  | 11 ANKK1_DRD2 | 0.37 Rec | 0.76(0.46-1.23) | 2.64E-01 | 9.99E-01 |
| rs2234689  | 11 ANKK1_DRD2 | 0.04 Add | 0.79(0.43-1.45) | 4.38E-01 | 9.99E-01 |
| rs10891544 | 11 ANKK1_DRD2 | 0.05 Add | 1.23(0.71-2.13) | 4.53E-01 | 9.99E-01 |
| rs7103679  | 11 ANKK1_DRD2 | 0.37 Rec | 0.77(0.48-1.25) | 2.88E-01 | 9.99E-01 |
| rs7118900  | 11 ANKK1_DRD2 | 0.40 Rec | 0.92(0.59-1.43) | 7.07E-01 | 9.99E-01 |
| rs2075654  | 11 ANKK1_DRD2 | 0.42 Add | 0.9(0.72-1.14)  | 4.05E-01 | 1.00E+00 |
| rs1079727  | 11 ANKK1_DRD2 | 0.42 Add | 0.9(0.72-1.14)  | 4.05E-01 | 1.00E+00 |
| rs11214607 | 11 ANKK1_DRD2 | 0.39 Rec | 0.78(0.49-1.26) | 3.14E-01 | 1.00E+00 |
| rs1079597  | 11 ANKK1_DRD2 | 0.42 Add | 0.91(0.72-1.15) | 4.31E-01 | 1.00E+00 |
| rs12224538 | 11 ANKK1_DRD2 | 0.49 Dom | 0.98(0.68-1.41) | 9.02E-01 | 1.00E+00 |
| rs4938014  | 11 ANKK1_DRD2 | 0.49 Dom | 0.98(0.68-1.41) | 9.02E-01 | 1.00E+00 |
| rs4590907  | 11 ANKK1_DRD2 | 0.50 Dom | 0.98(0.68-1.41) | 9.02E-01 | 1.00E+00 |
| rs11214605 | 11 ANKK1_DRD2 | 0.05 Dom | 1.19(0.71-1.98) | 5.15E-01 | 1.00E+00 |
| rs2471857  | 11 ANKK1_DRD2 | 0.42 Dom | 0.91(0.65-1.27) | 5.70E-01 | 1.00E+00 |
| rs12422191 | 11 ANKK1_DRD2 | 0.03 Add | 0.8(0.37-1.71)  | 5.60E-01 | 1.00E+00 |
| rs10891541 | 11 ANKK1_DRD2 | 0.49 Rec | 0.92(0.63-1.35) | 6.76E-01 | 1.00E+00 |
| rs3897584  | 11 ANKK1_DRD2 | 0.46 Rec | 0.83(0.55-1.25) | 3.70E-01 | 1.00E+00 |
| rs4648319  | 11 ANKK1_DRD2 | 0.38 Add | 0.92(0.72-1.17) | 4.80E-01 | 1.00E+00 |
| rs4938016  | 11 ANKK1_DRD2 | 0.46 Rec | 1.1(0.75-1.62)  | 6.15E-01 | 1.00E+00 |
| rs11214598 | 11 ANKK1_DRD2 | 0.46 Rec | 1.1(0.75-1.62)  | 6.15E-01 | 1.00E+00 |
| rs1107162  | 11 ANKK1_DRD2 | 0.06 Dom | 1.15(0.69-1.92) | 5.90E-01 | 1.00E+00 |
| rs7125415  | 11 ANKK1_DRD2 | 0.41 Add | 1.09(0.86-1.37) | 4.82E-01 | 1.00E+00 |
| rs17115583 | 11 ANKK1_DRD2 | 0.43 Rec | 1.2(0.8-1.78)   | 3.74E-01 | 1.00E+00 |
| rs1079596  | 11 ANKK1_DRD2 | 0.43 Rec | 0.91(0.59-1.39) | 6.58E-01 | 1.00E+00 |
| rs1125394  | 11 ANKK1_DRD2 | 0.42 Rec | 0.9(0.59-1.38)  | 6.35E-01 | 1.00E+00 |
| rs1076560  | 11 ANKK1_DRD2 | 0.42 Add | 0.92(0.73-1.17) | 5.03E-01 | 1.00E+00 |
| rs2283265  | 11 ANKK1_DRD2 | 0.42 Add | 0.92(0.73-1.17) | 5.05E-01 | 1.00E+00 |
| rs2734836  | 11 ANKK1_DRD2 | 0.42 Dom | 0.92(0.66-1.3)  | 6.47E-01 | 1.00E+00 |
| rs2005313  | 11 ANKK1_DRD2 | 0.48 Rec | 0.91(0.62-1.35) | 6.51E-01 | 1.00E+00 |
| rs1800497  | 11 ANKK1_DRD2 | 0.40 Rec | 0.89(0.57-1.39) | 6.08E-01 | 1.00E+00 |
| rs4938011  | 11 ANKK1_DRD2 | 0.49 Rec | 0.9(0.62-1.31)  | 5.82E-01 | 1.00E+00 |
| rs11214601 | 11 ANKK1_DRD2 | 0.40 Rec | 0.9(0.58-1.41)  | 6.45E-01 | 1.00E+00 |
| rs6279     | 11 ANKK1_DRD2 | 0.46 Dom | 1.1(0.77-1.57)  | 6.02E-01 | 1.00E+00 |
| rs6275     | 11 ANKK1_DRD2 | 0.46 Dom | 1.1(0.77-1.57)  | 6.02E-01 | 1.00E+00 |
| rs1124491  | 11 ANKK1_DRD2 | 0.40 Rec | 0.89(0.57-1.4)  | 6.22E-01 | 1.00E+00 |
| rs1079594  | 11 ANKK1_DRD2 | 0.40 Rec | 0.89(0.57-1.4)  | 6.22E-01 | 1.00E+00 |
| rs1079595  | 11 ANKK1_DRD2 | 0.40 Rec | 0.89(0.57-1.4)  | 6.22E-01 | 1.00E+00 |

|            |               |          |                 |          |          |
|------------|---------------|----------|-----------------|----------|----------|
| rs4938010  | 11 ANKK1_DRD2 | 0.49 Rec | 0.9(0.61-1.3)   | 5.64E-01 | 1.00E+00 |
| rs2075652  | 11 ANKK1_DRD2 | 0.42 Add | 1.06(0.84-1.33) | 6.38E-01 | 1.00E+00 |
| rs10891545 | 11 ANKK1_DRD2 | 0.50 Rec | 0.9(0.61-1.31)  | 5.69E-01 | 1.00E+00 |
| rs4620755  | 11 ANKK1_DRD2 | 0.42 Rec | 1.17(0.78-1.75) | 4.51E-01 | 1.00E+00 |
| rs4648318  | 11 ANKK1_DRD2 | 0.44 Rec | 0.95(0.63-1.42) | 7.94E-01 | 1.00E+00 |
| rs10891546 | 11 ANKK1_DRD2 | 0.45 Rec | 0.91(0.61-1.36) | 6.38E-01 | 1.00E+00 |
| rs4601821  | 11 ANKK1_DRD2 | 0.47 Rec | 0.86(0.58-1.27) | 4.42E-01 | 1.00E+00 |
| rs4436578  | 11 ANKK1_DRD2 | 0.44 Rec | 1.16(0.79-1.72) | 4.51E-01 | 1.00E+00 |
| rs2587548  | 11 ANKK1_DRD2 | 0.06 Dom | 1.14(0.68-1.89) | 6.25E-01 | 1.00E+00 |
| rs2734841  | 11 ANKK1_DRD2 | 0.46 Rec | 1.07(0.73-1.57) | 7.30E-01 | 1.00E+00 |
| rs6276     | 11 ANKK1_DRD2 | 0.46 Rec | 1.07(0.73-1.57) | 7.30E-01 | 1.00E+00 |
| rs2734842  | 11 ANKK1_DRD2 | 0.46 Rec | 1.07(0.73-1.57) | 7.30E-01 | 1.00E+00 |
| rs1124493  | 11 ANKK1_DRD2 | 0.46 Rec | 1.07(0.73-1.57) | 7.30E-01 | 1.00E+00 |
| rs2587550  | 11 ANKK1_DRD2 | 0.47 Rec | 1.07(0.73-1.57) | 7.30E-01 | 1.00E+00 |
| rs2242592  | 11 ANKK1_DRD2 | 0.47 Rec | 1.07(0.73-1.57) | 7.30E-01 | 1.00E+00 |
| rs11214602 | 11 ANKK1_DRD2 | 0.47 Rec | 1.07(0.73-1.57) | 7.30E-01 | 1.00E+00 |
| rs1003641  | 11 ANKK1_DRD2 | 0.47 Rec | 1.07(0.73-1.57) | 7.30E-01 | 1.00E+00 |
| rs12574471 | 11 ANKK1_DRD2 | 0.11 Rec | 0.63(0.14-2.93) | 5.55E-01 | 1.00E+00 |
| rs4938012  | 11 ANKK1_DRD2 | 0.44 Rec | 0.88(0.58-1.33) | 5.40E-01 | 1.00E+00 |
| rs4586205  | 11 ANKK1_DRD2 | 0.43 Dom | 0.95(0.68-1.33) | 7.69E-01 | 1.00E+00 |
| rs2471854  | 11 ANKK1_DRD2 | 0.42 Add | 0.94(0.75-1.19) | 6.22E-01 | 1.00E+00 |
| rs2859545  | 11 ANKK1_DRD2 | 0.47 Rec | 1.06(0.72-1.56) | 7.59E-01 | 1.00E+00 |
| rs17115439 | 11 ANKK1_DRD2 | 0.44 Rec | 0.87(0.58-1.32) | 5.19E-01 | 1.00E+00 |
| rs4938013  | 11 ANKK1_DRD2 | 0.44 Rec | 0.87(0.58-1.32) | 5.19E-01 | 1.00E+00 |
| rs4938015  | 11 ANKK1_DRD2 | 0.44 Rec | 0.87(0.58-1.32) | 5.19E-01 | 1.00E+00 |
| rs7123797  | 11 ANKK1_DRD2 | 0.44 Rec | 0.87(0.58-1.32) | 5.19E-01 | 1.00E+00 |
| rs7945132  | 11 ANKK1_DRD2 | 0.44 Rec | 0.87(0.58-1.32) | 5.19E-01 | 1.00E+00 |
| rs877138   | 11 ANKK1_DRD2 | 0.47 Rec | 0.88(0.59-1.31) | 5.23E-01 | 1.00E+00 |
| rs4923468  | 11 BDNF       | 0.02 Dom | 2.38(1.23-4.58) | 9.83E-03 | 1.81E-01 |
| rs10767664 | 11 BDNF       | 0.47 Dom | 0.7(0.5-0.98)   | 3.79E-02 | 5.61E-01 |
| rs16917271 | 11 BDNF       | 0.18 Add | 1.36(1.02-1.8)  | 3.35E-02 | 5.62E-01 |
| rs2030323  | 11 BDNF       | 0.47 Dom | 0.7(0.5-0.99)   | 4.28E-02 | 6.01E-01 |
| rs988748   | 11 BDNF       | 0.47 Dom | 0.7(0.5-0.99)   | 4.36E-02 | 6.07E-01 |
| rs1519480  | 11 BDNF       | 0.25 Add | 1.3(1.01-1.68)  | 4.13E-02 | 6.20E-01 |
| rs1491850  | 11 BDNF       | 0.46 Dom | 0.71(0.51-0.99) | 4.42E-02 | 6.36E-01 |
| rs6484320  | 11 BDNF       | 0.48 Dom | 0.71(0.51-1)    | 5.34E-02 | 6.63E-01 |
| rs7103411  | 11 BDNF       | 0.48 Dom | 0.71(0.51-1)    | 5.34E-02 | 6.63E-01 |

|            |         |          |                 |          |          |
|------------|---------|----------|-----------------|----------|----------|
| rs16917237 | 11 BDNF | 0.48 Dom | 0.71(0.51-1)    | 5.34E-02 | 6.64E-01 |
| rs10501087 | 11 BDNF | 0.47 Dom | 0.74(0.52-1.04) | 7.93E-02 | 7.94E-01 |
| rs925947   | 11 BDNF | 0.47 Dom | 0.74(0.52-1.04) | 8.39E-02 | 8.10E-01 |
| rs12419948 | 11 BDNF | 0.47 Dom | 0.74(0.52-1.04) | 8.39E-02 | 8.11E-01 |
| rs1013402  | 11 BDNF | 0.05 Add | 0.94(0.54-1.63) | 8.19E-01 | 8.62E-01 |
| rs11030098 | 11 BDNF | 0.17 Dom | 1.32(0.95-1.84) | 1.02E-01 | 8.63E-01 |
| rs7102921  | 11 BDNF | 0.17 Dom | 1.32(0.95-1.84) | 1.02E-01 | 8.64E-01 |
| rs7127507  | 11 BDNF | 0.07 Add | 1.33(0.87-2.04) | 1.86E-01 | 8.64E-01 |
| rs7940188  | 11 BDNF | 0.18 Add | 1.26(0.95-1.68) | 1.07E-01 | 8.65E-01 |
| rs12273539 | 11 BDNF | 0.18 Add | 1.26(0.95-1.68) | 1.07E-01 | 8.65E-01 |
| rs12291186 | 11 BDNF | 0.18 Add | 1.26(0.95-1.68) | 1.07E-01 | 8.65E-01 |
| rs12291063 | 11 BDNF | 0.18 Add | 1.26(0.95-1.68) | 1.07E-01 | 8.65E-01 |
| rs16917234 | 11 BDNF | 0.18 Add | 1.26(0.95-1.68) | 1.07E-01 | 8.65E-01 |
| rs7931247  | 11 BDNF | 0.47 Rec | 1.35(0.94-1.94) | 1.06E-01 | 8.72E-01 |
| rs11030119 | 11 BDNF | 0.05 Add | 0.93(0.53-1.63) | 8.06E-01 | 8.79E-01 |
| rs11030104 | 11 BDNF | 0.48 Rec | 0.78(0.53-1.16) | 2.18E-01 | 8.80E-01 |
| rs962369   | 11 BDNF | 0.05 Add | 0.93(0.53-1.62) | 7.90E-01 | 8.84E-01 |
| rs7124442  | 11 BDNF | 0.07 Dom | 1.28(0.81-2)    | 2.89E-01 | 8.87E-01 |
| rs7103873  | 11 BDNF | 0.45 Dom | 1.18(0.83-1.68) | 3.58E-01 | 8.89E-01 |
| rs11030121 | 11 BDNF | 0.07 Add | 1.29(0.84-1.97) | 2.46E-01 | 8.89E-01 |
| rs7927728  | 11 BDNF | 0.04 Add | 0.72(0.38-1.37) | 3.14E-01 | 8.90E-01 |
| rs908867   | 11 BDNF | 0.04 Add | 0.76(0.39-1.49) | 4.22E-01 | 9.04E-01 |
| rs11030123 | 11 BDNF | 0.04 Add | 0.76(0.39-1.49) | 4.22E-01 | 9.04E-01 |
| rs10767665 | 11 BDNF | 0.46 Dom | 1.2(0.84-1.72)  | 3.08E-01 | 9.11E-01 |
| rs7934165  | 11 BDNF | 0.46 Dom | 1.2(0.84-1.72)  | 3.08E-01 | 9.12E-01 |
| rs2030324  | 11 BDNF | 0.46 Dom | 1.2(0.84-1.72)  | 3.08E-01 | 9.12E-01 |
| rs2049046  | 11 BDNF | 0.46 Dom | 1.2(0.84-1.72)  | 3.07E-01 | 9.12E-01 |
| rs2049048  | 11 BDNF | 0.06 Dom | 0.77(0.46-1.29) | 3.25E-01 | 9.18E-01 |
| rs6265     | 11 BDNF | 0.48 Dom | 0.83(0.59-1.17) | 2.85E-01 | 9.19E-01 |
| rs11030101 | 11 BDNF | 0.28 Rec | 0.74(0.4-1.37)  | 3.34E-01 | 9.46E-01 |
| rs10835210 | 11 BDNF | 0.28 Rec | 0.74(0.4-1.37)  | 3.34E-01 | 9.46E-01 |
| rs925946   | 11 BDNF | 0.05 Add | 0.9(0.52-1.56)  | 7.01E-01 | 9.66E-01 |
| rs10767658 | 11 BDNF | 0.05 Add | 0.9(0.52-1.56)  | 7.01E-01 | 9.66E-01 |
| rs1401635  | 11 BDNF | 0.05 Add | 0.91(0.52-1.58) | 7.28E-01 | 9.68E-01 |
| rs11030108 | 11 BDNF | 0.05 Add | 0.91(0.52-1.58) | 7.28E-01 | 9.68E-01 |
| rs1519479  | 11 BDNF | 0.28 Rec | 0.84(0.45-1.56) | 5.76E-01 | 9.75E-01 |
| rs2203877  | 11 BDNF | 0.28 Rec | 0.84(0.45-1.56) | 5.76E-01 | 9.75E-01 |

|            |          |          |                 |          |          |
|------------|----------|----------|-----------------|----------|----------|
| rs11030107 | 11 BDNF  | 0.05 Dom | 1.13(0.66-1.94) | 6.53E-01 | 9.81E-01 |
| rs3213718  | 14 CALM1 | 0.20 Rec | 2.19(1.13-4.24) | 2.05E-02 | 4.68E-01 |
| rs2300500  | 14 CALM1 | 0.18 Rec | 2.12(1.02-4.37) | 4.30E-02 | 6.93E-01 |
| rs2300496  | 14 CALM1 | 0.18 Rec | 2.12(1.02-4.37) | 4.30E-02 | 6.93E-01 |
| rs3179089  | 14 CALM1 | 0.19 Rec | 2.12(1.02-4.37) | 4.30E-02 | 6.93E-01 |
| rs12433818 | 14 CALM1 | 0.47 Rec | 1.43(0.99-2.06) | 5.65E-02 | 7.02E-01 |
| rs12895068 | 14 CALM1 | 0.47 Rec | 1.43(0.99-2.06) | 5.65E-02 | 7.02E-01 |
| rs12891145 | 14 CALM1 | 0.21 Rec | 1.88(0.98-3.61) | 5.72E-02 | 7.07E-01 |
| rs11629265 | 14 CALM1 | 0.19 Rec | 2.07(1-4.25)    | 4.88E-02 | 7.32E-01 |
| rs12885713 | 14 CALM1 | 0.19 Rec | 2.05(1-4.21)    | 5.07E-02 | 7.33E-01 |
| rs2896135  | 14 CALM1 | 0.23 Rec | 1.72(0.91-3.26) | 9.61E-02 | 8.54E-01 |
| rs7147045  | 14 CALM1 | 0.02 Add | 0.66(0.27-1.61) | 3.57E-01 | 9.52E-01 |
| rs6575134  | 14 CALM1 | 0.08 Add | 0.99(0.67-1.48) | 9.71E-01 | 9.70E-01 |
| rs3814843  | 14 CALM1 | 0.09 Add | 1.01(0.69-1.48) | 9.56E-01 | 9.90E-01 |
| rs2110113  | 14 CALM1 | 0.21 Rec | 0.83(0.36-1.87) | 6.45E-01 | 9.94E-01 |
| rs2110114  | 14 CALM1 | 0.21 Rec | 0.83(0.36-1.87) | 6.45E-01 | 9.94E-01 |
| rs2300497  | 14 CALM1 | 0.21 Rec | 0.84(0.37-1.91) | 6.79E-01 | 9.94E-01 |
| rs6575131  | 14 CALM1 | 0.21 Rec | 0.84(0.37-1.91) | 6.79E-01 | 9.94E-01 |
| rs2300502  | 14 CALM1 | 0.21 Rec | 0.84(0.37-1.91) | 6.79E-01 | 9.94E-01 |
| rs5871     | 14 CALM1 | 0.41 Dom | 1.18(0.84-1.66) | 3.52E-01 | 9.96E-01 |
| rs10129175 | 14 CALM1 | 0.37 Dom | 1.06(0.77-1.48) | 7.08E-01 | 9.98E-01 |
| rs759062   | 14 CALM1 | 0.16 Rec | 0.75(0.25-2.29) | 6.16E-01 | 9.98E-01 |
| rs2268433  | 14 CALM1 | 0.24 Rec | 0.84(0.39-1.82) | 6.65E-01 | 9.99E-01 |
| rs3814847  | 14 CALM1 | 0.23 Add | 0.93(0.7-1.22)  | 5.99E-01 | 9.99E-01 |
| rs8006462  | 14 CALM1 | 0.16 Add | 0.95(0.69-1.29) | 7.26E-01 | 9.99E-01 |
| rs4904690  | 14 CALM1 | 0.37 Dom | 1.05(0.76-1.45) | 7.79E-01 | 1.00E+00 |
| rs876259   | 14 CALM1 | 0.37 Dom | 1.05(0.75-1.45) | 7.90E-01 | 1.00E+00 |
| rs2288645  | 7 CDK5   | 0.21 Rec | 0.33(0.11-0.94) | 3.90E-02 | 3.34E-01 |
| rs3793336  | 7 CDK5   | 0.06 Add | 0.65(0.38-1.09) | 1.04E-01 | 6.16E-01 |
| rs11765015 | 7 CDK5   | 0.40 Rec | 1.45(0.96-2.17) | 7.42E-02 | 7.50E-01 |
| rs2069456  | 7 CDK5   | 0.35 Add | 1.16(0.92-1.47) | 2.04E-01 | 7.99E-01 |
| rs2303936  | 7 CDK5   | 0.01 Add | 0.45(0.1-2.04)  | 3.03E-01 | 8.43E-01 |
| rs2303928  | 7 CDK5   | 0.30 Add | 0.85(0.66-1.08) | 1.86E-01 | 8.48E-01 |
| rs1549759  | 7 CDK5   | 0.05 Add | 0.7(0.4-1.22)   | 2.04E-01 | 8.48E-01 |
| rs891507   | 7 CDK5   | 0.05 Add | 0.7(0.4-1.22)   | 2.04E-01 | 8.48E-01 |
| rs2303934  | 7 CDK5   | 0.11 Rec | 2.59(0.73-9.17) | 1.41E-01 | 8.55E-01 |
| rs2303937  | 7 CDK5   | 0.42 Rec | 1.28(0.85-1.91) | 2.34E-01 | 8.89E-01 |

|            |          |          |                 |          |          |
|------------|----------|----------|-----------------|----------|----------|
| rs2303929  | 7 CDK5   | 0.30 Dom | 1.06(0.77-1.46) | 7.01E-01 | 9.10E-01 |
| rs1549760  | 7 CDK5   | 0.29 Dom | 1.18(0.86-1.62) | 3.17E-01 | 9.11E-01 |
| rs2069459  | 7 CDK5   | 0.36 Add | 0.91(0.72-1.16) | 4.57E-01 | 9.50E-01 |
| rs2069443  | 7 CDK5   | 0.31 Dom | 1.08(0.79-1.49) | 6.28E-01 | 9.88E-01 |
| rs2303933  | 7 CDK5   | 0.26 Rec | 0.88(0.47-1.65) | 6.95E-01 | 9.90E-01 |
| rs735421   | 8 CHRNA2 | 0.19 Dom | 1.51(1.09-2.1)  | 1.31E-02 | 3.47E-01 |
| rs747111   | 8 CHRNA2 | 0.18 Add | 1.42(1.06-1.89) | 1.78E-02 | 4.39E-01 |
| rs2280376  | 8 CHRNA2 | 0.18 Dom | 1.41(1.01-1.96) | 4.27E-02 | 6.68E-01 |
| rs2278319  | 8 CHRNA2 | 0.18 Dom | 1.36(0.97-1.89) | 7.13E-02 | 8.27E-01 |
| rs2565059  | 8 CHRNA2 | 0.07 Add | 1.38(0.91-2.11) | 1.29E-01 | 8.30E-01 |
| rs891394   | 8 CHRNA2 | 0.19 Add | 1.3(0.98-1.74)  | 6.97E-02 | 8.35E-01 |
| rs2565061  | 8 CHRNA2 | 0.47 Rec | 0.72(0.48-1.09) | 1.22E-01 | 9.27E-01 |
| rs2565062  | 8 CHRNA2 | 0.47 Rec | 0.73(0.48-1.1)  | 1.30E-01 | 9.39E-01 |
| rs2099166  | 8 CHRNA2 | 0.47 Rec | 0.73(0.48-1.1)  | 1.30E-01 | 9.39E-01 |
| rs3735757  | 8 CHRNA2 | 0.48 Rec | 0.74(0.49-1.1)  | 1.37E-01 | 9.49E-01 |
| rs2741343  | 8 CHRNA2 | 0.34 Rec | 0.68(0.4-1.14)  | 1.46E-01 | 9.53E-01 |
| rs2292974  | 8 CHRNA2 | 0.31 Dom | 1.27(0.92-1.75) | 1.45E-01 | 9.57E-01 |
| rs2472554  | 8 CHRNA2 | 0.19 Rec | 0.54(0.22-1.32) | 1.79E-01 | 9.64E-01 |
| rs919494   | 8 CHRNA2 | 0.19 Rec | 0.9(0.4-2.01)   | 7.90E-01 | 9.65E-01 |
| rs2472553  | 8 CHRNA2 | 0.47 Rec | 0.75(0.5-1.13)  | 1.67E-01 | 9.65E-01 |
| rs2741342  | 8 CHRNA2 | 0.47 Rec | 0.75(0.5-1.13)  | 1.67E-01 | 9.65E-01 |
| rs7815010  | 8 CHRNA2 | 0.45 Rec | 0.74(0.49-1.13) | 1.64E-01 | 9.66E-01 |
| rs1106359  | 8 CHRNA2 | 0.19 Rec | 0.92(0.41-2.06) | 8.34E-01 | 9.72E-01 |
| rs10093964 | 8 CHRNA2 | 0.19 Rec | 0.92(0.41-2.06) | 8.34E-01 | 9.72E-01 |
| rs751018   | 8 CHRNA2 | 0.19 Rec | 0.92(0.41-2.06) | 8.34E-01 | 9.72E-01 |
| rs7007145  | 8 CHRNA2 | 0.19 Rec | 0.92(0.41-2.06) | 8.34E-01 | 9.72E-01 |
| rs1560344  | 8 CHRNA2 | 0.31 Dom | 1.25(0.91-1.72) | 1.73E-01 | 9.74E-01 |
| rs2565065  | 8 CHRNA2 | 0.19 Rec | 0.56(0.23-1.38) | 2.09E-01 | 9.79E-01 |
| rs891393   | 8 CHRNA2 | 0.50 Dom | 1.15(0.79-1.68) | 4.65E-01 | 9.81E-01 |
| rs2251430  | 8 CHRNA2 | 0.50 Dom | 1.15(0.79-1.68) | 4.65E-01 | 9.81E-01 |
| rs2741339  | 8 CHRNA2 | 0.20 Add | 1.16(0.89-1.51) | 2.84E-01 | 9.82E-01 |
| rs2292977  | 8 CHRNA2 | 0.50 Dom | 1.15(0.79-1.67) | 4.80E-01 | 9.82E-01 |
| rs891399   | 8 CHRNA2 | 0.48 Rec | 0.78(0.52-1.16) | 2.14E-01 | 9.86E-01 |
| rs2292975  | 8 CHRNA2 | 0.30 Dom | 1.2(0.87-1.65)  | 2.70E-01 | 9.87E-01 |
| rs4733065  | 8 CHRNA2 | 0.31 Dom | 1.2(0.87-1.65)  | 2.70E-01 | 9.88E-01 |
| rs2741335  | 8 CHRNA2 | 0.20 Add | 1.14(0.87-1.49) | 3.55E-01 | 9.90E-01 |
| rs3824103  | 8 CHRNA2 | 0.47 Rec | 0.79(0.52-1.18) | 2.48E-01 | 9.90E-01 |

|           |           |          |                 |          |          |
|-----------|-----------|----------|-----------------|----------|----------|
| rs2565055 | 8 CHRNA2  | 0.19 Rec | 1.56(0.78-3.15) | 2.10E-01 | 9.91E-01 |
| rs2565056 | 8 CHRNA2  | 0.19 Rec | 1.56(0.78-3.15) | 2.10E-01 | 9.91E-01 |
| rs1864375 | 8 CHRNA2  | 0.48 Rec | 0.79(0.53-1.17) | 2.35E-01 | 9.91E-01 |
| rs2741338 | 8 CHRNA2  | 0.20 Rec | 1.49(0.75-2.99) | 2.58E-01 | 9.92E-01 |
| rs2741337 | 8 CHRNA2  | 0.20 Rec | 1.49(0.75-2.99) | 2.58E-01 | 9.92E-01 |
| rs876891  | 8 CHRNA2  | 0.13 Rec | 0.61(0.17-2.22) | 4.56E-01 | 9.92E-01 |
| rs1879184 | 8 CHRNA2  | 0.50 Rec | 0.82(0.56-1.2)  | 3.04E-01 | 9.93E-01 |
| rs891398  | 8 CHRNA2  | 0.37 Add | 0.89(0.71-1.12) | 3.31E-01 | 9.93E-01 |
| rs1879181 | 8 CHRNA2  | 0.50 Rec | 0.82(0.56-1.2)  | 3.09E-01 | 9.93E-01 |
| rs748281  | 8 CHRNA2  | 0.50 Rec | 0.82(0.56-1.2)  | 3.09E-01 | 9.93E-01 |
| rs2280375 | 8 CHRNA2  | 0.50 Rec | 0.82(0.56-1.2)  | 3.09E-01 | 9.93E-01 |
| rs1879182 | 8 CHRNA2  | 0.50 Rec | 0.82(0.56-1.2)  | 3.09E-01 | 9.94E-01 |
| rs748282  | 8 CHRNA2  | 0.50 Rec | 0.82(0.56-1.2)  | 3.09E-01 | 9.94E-01 |
| rs2292976 | 8 CHRNA2  | 0.50 Rec | 0.82(0.56-1.2)  | 3.09E-01 | 9.94E-01 |
| rs1583092 | 8 CHRNA2  | 0.50 Rec | 0.82(0.56-1.2)  | 3.09E-01 | 9.94E-01 |
| rs751019  | 8 CHRNA2  | 0.31 Dom | 1.18(0.86-1.62) | 3.15E-01 | 9.95E-01 |
| rs2322581 | 8 CHRNA2  | 0.47 Rec | 0.82(0.55-1.22) | 3.28E-01 | 9.95E-01 |
| rs752993  | 8 CHRNA2  | 0.30 Dom | 1.17(0.85-1.62) | 3.25E-01 | 9.95E-01 |
| rs1057137 | 8 CHRNA2  | 0.19 Add | 0.92(0.69-1.22) | 5.72E-01 | 9.95E-01 |
| rs2271920 | 8 CHRNA2  | 0.19 Add | 0.92(0.69-1.22) | 5.72E-01 | 9.95E-01 |
| rs2565045 | 8 CHRNA2  | 0.19 Rec | 0.66(0.27-1.63) | 3.68E-01 | 9.96E-01 |
| rs9314347 | 8 CHRNA2  | 0.04 Add | 1(0.54-1.84)    | 9.96E-01 | 9.96E-01 |
| rs6558000 | 8 CHRNA2  | 0.13 Rec | 0.58(0.16-2.1)  | 4.09E-01 | 9.96E-01 |
| rs748283  | 8 CHRNA2  | 0.30 Dom | 1.16(0.84-1.59) | 3.68E-01 | 9.97E-01 |
| rs2322583 | 8 CHRNA2  | 0.47 Rec | 0.83(0.56-1.23) | 3.54E-01 | 9.97E-01 |
| rs2163177 | 8 CHRNA2  | 0.47 Rec | 0.83(0.56-1.23) | 3.54E-01 | 9.97E-01 |
| rs2322584 | 8 CHRNA2  | 0.47 Rec | 0.83(0.56-1.23) | 3.54E-01 | 9.97E-01 |
| rs2043063 | 8 CHRNA2  | 0.47 Rec | 0.83(0.56-1.23) | 3.54E-01 | 9.97E-01 |
| rs2565067 | 8 CHRNA2  | 0.19 Rec | 0.69(0.28-1.73) | 4.34E-01 | 9.98E-01 |
| rs3787137 | 20 CHRNA4 | 0.37 Rec | 0.44(0.25-0.77) | 3.97E-03 | 3.85E-02 |
| rs755203  | 20 CHRNA4 | 0.38 Rec | 0.49(0.29-0.83) | 7.74E-03 | 8.02E-02 |
| rs4809538 | 20 CHRNA4 | 0.41 Dom | 1.4(0.99-1.97)  | 5.65E-02 | 4.73E-01 |
| rs1044396 | 20 CHRNA4 | 0.26 Add | 0.77(0.59-1)    | 5.24E-02 | 4.79E-01 |
| rs3787138 | 20 CHRNA4 | 0.14 Dom | 1.36(0.96-1.93) | 8.82E-02 | 6.47E-01 |
| rs2273505 | 20 CHRNA4 | 0.13 Dom | 1.32(0.92-1.89) | 1.28E-01 | 7.37E-01 |
| rs4603829 | 20 CHRNA4 | 0.43 Dom | 1.31(0.93-1.86) | 1.24E-01 | 7.46E-01 |
| rs9680065 | 20 CHRNA4 | 0.43 Dom | 1.31(0.93-1.86) | 1.24E-01 | 7.46E-01 |



|            |                         |          |                 |          |          |
|------------|-------------------------|----------|-----------------|----------|----------|
| rs4522666  | 20 CHRNA4               | 0.44 Rec | 0.88(0.59-1.31) | 5.21E-01 | 7.64E-01 |
| rs2273504  | 20 CHRNA4               | 0.48 Dom | 1.31(0.9-1.89)  | 1.58E-01 | 7.82E-01 |
| rs2093107  | 20 CHRNA4               | 0.48 Add | 1.09(0.88-1.37) | 4.28E-01 | 7.85E-01 |
| rs2236196  | 20 CHRNA4               | 0.15 Dom | 1.28(0.9-1.82)  | 1.66E-01 | 7.86E-01 |
| rs755204   | 20 CHRNA4               | 0.13 Dom | 1.22(0.85-1.74) | 2.85E-01 | 8.46E-01 |
| rs6011776  | 20 CHRNA4               | 0.14 Dom | 1.23(0.86-1.75) | 2.66E-01 | 8.47E-01 |
| rs4809549  | 20 CHRNA4               | 0.39 Dom | 0.83(0.6-1.14)  | 2.50E-01 | 8.94E-01 |
| rs3787140  | 20 CHRNA4               | 0.14 Dom | 1.24(0.86-1.77) | 2.45E-01 | 8.95E-01 |
| rs3743073  | 15 CHRNA5_CHRNA3_CHRNB4 | 0.46 Rec | 0.67(0.45-1.02) | 6.04E-02 | 8.93E-01 |
| rs3743075  | 15 CHRNA5_CHRNA3_CHRNB4 | 0.46 Rec | 0.69(0.45-1.04) | 7.54E-02 | 9.38E-01 |
| rs7178270  | 15 CHRNA5_CHRNA3_CHRNB4 | 0.40 Rec | 0.66(0.41-1.06) | 8.37E-02 | 9.51E-01 |
| rs871058   | 15 CHRNA5_CHRNA3_CHRNB4 | 0.14 Rec | 0.23(0.03-1.77) | 1.59E-01 | 9.62E-01 |
| rs3743074  | 15 CHRNA5_CHRNA3_CHRNB4 | 0.46 Rec | 0.71(0.47-1.08) | 1.07E-01 | 9.78E-01 |
| rs637137   | 15 CHRNA5_CHRNA3_CHRNB4 | 0.46 Rec | 1.37(0.94-1.98) | 9.86E-02 | 9.79E-01 |
| rs569207   | 15 CHRNA5_CHRNA3_CHRNB4 | 0.46 Rec | 1.36(0.94-1.97) | 9.99E-02 | 9.80E-01 |
| rs578776   | 15 CHRNA5_CHRNA3_CHRNB4 | 0.23 Rec | 0.57(0.27-1.21) | 1.45E-01 | 9.91E-01 |
| rs518425   | 15 CHRNA5_CHRNA3_CHRNB4 | 0.23 Rec | 0.57(0.27-1.21) | 1.45E-01 | 9.91E-01 |
| rs667282   | 15 CHRNA5_CHRNA3_CHRNB4 | 0.46 Rec | 1.34(0.92-1.93) | 1.24E-01 | 9.92E-01 |
| rs11636753 | 15 CHRNA5_CHRNA3_CHRNB4 | 0.19 Add | 1(0.75-1.33)    | 9.98E-01 | 9.98E-01 |
| rs16969968 | 15 CHRNA5_CHRNA3_CHRNB4 | 0.03 Add | 0.97(0.51-1.85) | 9.30E-01 | 9.99E-01 |
| rs12910984 | 15 CHRNA5_CHRNA3_CHRNB4 | 0.44 Rec | 1.3(0.89-1.9)   | 1.77E-01 | 9.99E-01 |
| rs938682   | 15 CHRNA5_CHRNA3_CHRNB4 | 0.44 Rec | 1.3(0.89-1.9)   | 1.77E-01 | 9.99E-01 |
| rs3743078  | 15 CHRNA5_CHRNA3_CHRNB4 | 0.24 Rec | 0.62(0.31-1.28) | 1.98E-01 | 9.99E-01 |
| rs621849   | 15 CHRNA5_CHRNA3_CHRNB4 | 0.27 Rec | 0.66(0.33-1.29) | 2.24E-01 | 1.00E+00 |
| rs3743076  | 15 CHRNA5_CHRNA3_CHRNB4 | 0.25 Rec | 0.62(0.29-1.34) | 2.26E-01 | 1.00E+00 |
| rs11637630 | 15 CHRNA5_CHRNA3_CHRNB4 | 0.44 Rec | 1.28(0.87-1.86) | 2.09E-01 | 1.00E+00 |
| rs692780   | 15 CHRNA5_CHRNA3_CHRNB4 | 0.21 Rec | 0.61(0.27-1.4)  | 2.45E-01 | 1.00E+00 |
| rs12914385 | 15 CHRNA5_CHRNA3_CHRNB4 | 0.28 Rec | 0.88(0.47-1.67) | 7.05E-01 | 1.00E+00 |
| rs1051730  | 15 CHRNA5_CHRNA3_CHRNB4 | 0.03 Add | 0.98(0.49-1.96) | 9.63E-01 | 1.00E+00 |
| rs950776   | 15 CHRNA5_CHRNA3_CHRNB4 | 0.15 Rec | 0.45(0.1-1.98)  | 2.89E-01 | 1.00E+00 |
| rs555018   | 15 CHRNA5_CHRNA3_CHRNB4 | 0.19 Add | 0.89(0.66-1.18) | 4.11E-01 | 1.00E+00 |
| rs601079   | 15 CHRNA5_CHRNA3_CHRNB4 | 0.26 Rec | 0.69(0.35-1.37) | 2.93E-01 | 1.00E+00 |
| rs1948     | 15 CHRNA5_CHRNA3_CHRNB4 | 0.48 Rec | 0.8(0.55-1.18)  | 2.62E-01 | 1.00E+00 |
| rs3971872  | 15 CHRNA5_CHRNA3_CHRNB4 | 0.19 Rec | 1.23(0.51-2.94) | 6.42E-01 | 1.00E+00 |
| rs495956   | 15 CHRNA5_CHRNA3_CHRNB4 | 0.26 Rec | 0.69(0.35-1.36) | 2.78E-01 | 1.00E+00 |
| rs680244   | 15 CHRNA5_CHRNA3_CHRNB4 | 0.26 Rec | 0.69(0.35-1.36) | 2.78E-01 | 1.00E+00 |
| rs12440014 | 15 CHRNA5_CHRNA3_CHRNB4 | 0.46 Dom | 1.14(0.8-1.62)  | 4.79E-01 | 1.00E+00 |

|            |                         |      |     |                 |          |          |
|------------|-------------------------|------|-----|-----------------|----------|----------|
| rs12441998 | 15 CHRNA5_CHRNA3_CHRNB4 | 0.22 | Rec | 0.77(0.36-1.66) | 5.11E-01 | 1.00E+00 |
| rs11072768 | 15 CHRNA5_CHRNA3_CHRNB4 | 0.22 | Rec | 0.77(0.36-1.66) | 5.11E-01 | 1.00E+00 |
| rs1316971  | 15 CHRNA5_CHRNA3_CHRNB4 | 0.22 | Rec | 0.77(0.36-1.66) | 5.11E-01 | 1.00E+00 |
| rs3743072  | 15 CHRNA5_CHRNA3_CHRNB4 | 0.06 | Dom | 0.81(0.48-1.37) | 4.38E-01 | 1.00E+00 |
| rs17487223 | 15 CHRNA5_CHRNA3_CHRNB4 | 0.02 | Dom | 1.09(0.53-2.23) | 8.20E-01 | 1.00E+00 |
| rs7178897  | 15 CHRNA5_CHRNA3_CHRNB4 | 0.07 | Dom | 0.91(0.57-1.47) | 7.06E-01 | 1.00E+00 |
| rs2036527  | 15 CHRNA5_CHRNA3_CHRNB4 | 0.03 | Dom | 1.09(0.57-2.08) | 7.90E-01 | 1.00E+00 |
| rs11072773 | 15 CHRNA5_CHRNA3_CHRNB4 | 0.02 | Dom | 0.85(0.36-1.97) | 6.97E-01 | 1.00E+00 |
| rs6495307  | 15 CHRNA5_CHRNA3_CHRNB4 | 0.20 | Rec | 0.67(0.29-1.54) | 3.45E-01 | 1.00E+00 |
| rs684513   | 15 CHRNA5_CHRNA3_CHRNB4 | 0.24 | Add | 1.1(0.84-1.42)  | 4.95E-01 | 1.00E+00 |
| rs6495308  | 15 CHRNA5_CHRNA3_CHRNB4 | 0.30 | Dom | 0.91(0.66-1.24) | 5.41E-01 | 1.00E+00 |
| rs7177514  | 15 CHRNA5_CHRNA3_CHRNB4 | 0.30 | Dom | 0.91(0.66-1.24) | 5.41E-01 | 1.00E+00 |
| rs8042374  | 15 CHRNA5_CHRNA3_CHRNB4 | 0.30 | Dom | 0.91(0.66-1.24) | 5.41E-01 | 1.00E+00 |
| rs4887069  | 15 CHRNA5_CHRNA3_CHRNB4 | 0.30 | Dom | 0.91(0.66-1.24) | 5.41E-01 | 1.00E+00 |
| rs8042059  | 15 CHRNA5_CHRNA3_CHRNB4 | 0.30 | Dom | 0.91(0.66-1.24) | 5.41E-01 | 1.00E+00 |
| rs11636605 | 15 CHRNA5_CHRNA3_CHRNB4 | 0.21 | Rec | 0.81(0.38-1.75) | 5.98E-01 | 1.00E+00 |
| rs6495309  | 15 CHRNA5_CHRNA3_CHRNB4 | 0.44 | Add | 1.07(0.86-1.34) | 5.41E-01 | 1.00E+00 |
| rs647041   | 15 CHRNA5_CHRNA3_CHRNB4 | 0.20 | Rec | 0.68(0.29-1.56) | 3.59E-01 | 1.00E+00 |
| rs4275821  | 15 CHRNA5_CHRNA3_CHRNB4 | 0.18 | Rec | 0.7(0.28-1.72)  | 4.36E-01 | 1.00E+00 |
| rs7173512  | 15 CHRNA5_CHRNA3_CHRNB4 | 0.18 | Rec | 0.7(0.28-1.72)  | 4.36E-01 | 1.00E+00 |
| rs481134   | 15 CHRNA5_CHRNA3_CHRNB4 | 0.19 | Rec | 0.67(0.27-1.64) | 3.80E-01 | 1.00E+00 |
| rs10519205 | 15 CHRNA5_CHRNA3_CHRNB4 | 0.07 | Dom | 0.87(0.55-1.4)  | 5.76E-01 | 1.00E+00 |
| rs1878399  | 15 CHRNA5_CHRNA3_CHRNB4 | 0.19 | Rec | 0.66(0.27-1.64) | 3.75E-01 | 1.00E+00 |
| rs588765   | 15 CHRNA5_CHRNA3_CHRNB4 | 0.19 | Rec | 0.66(0.27-1.63) | 3.73E-01 | 1.00E+00 |
| rs6495306  | 15 CHRNA5_CHRNA3_CHRNB4 | 0.19 | Rec | 0.66(0.27-1.63) | 3.73E-01 | 1.00E+00 |
| rs2869546  | 15 CHRNA5_CHRNA3_CHRNB4 | 0.20 | Add | 0.91(0.69-1.2)  | 4.97E-01 | 1.00E+00 |
| rs11633223 | 15 CHRNA5_CHRNA3_CHRNB4 | 0.10 | Dom | 0.91(0.61-1.37) | 6.63E-01 | 1.00E+00 |
| rs1317286  | 15 CHRNA5_CHRNA3_CHRNB4 | 0.11 | Add | 0.91(0.63-1.31) | 6.10E-01 | 1.00E+00 |
| rs1875869  | 15 CHRNA5_CHRNA3_CHRNB4 | 0.07 | Dom | 0.89(0.55-1.42) | 6.19E-01 | 1.00E+00 |
| rs16969949 | 15 CHRNA5_CHRNA3_CHRNB4 | 0.07 | Dom | 0.89(0.55-1.42) | 6.19E-01 | 1.00E+00 |
| rs660652   | 15 CHRNA5_CHRNA3_CHRNB4 | 0.20 | Rec | 0.7(0.3-1.61)   | 4.00E-01 | 1.00E+00 |
| rs615470   | 15 CHRNA5_CHRNA3_CHRNB4 | 0.20 | Rec | 0.7(0.3-1.61)   | 4.00E-01 | 1.00E+00 |
| rs17408276 | 15 CHRNA5_CHRNA3_CHRNB4 | 0.20 | Rec | 0.7(0.3-1.61)   | 4.00E-01 | 1.00E+00 |
| rs472054   | 15 CHRNA5_CHRNA3_CHRNB4 | 0.20 | Rec | 0.7(0.3-1.61)   | 4.00E-01 | 1.00E+00 |
| rs514743   | 15 CHRNA5_CHRNA3_CHRNB4 | 0.20 | Rec | 0.7(0.3-1.61)   | 4.00E-01 | 1.00E+00 |
| rs17486278 | 15 CHRNA5_CHRNA3_CHRNB4 | 0.28 | Dom | 0.93(0.68-1.28) | 6.53E-01 | 1.00E+00 |
| rs951266   | 15 CHRNA5_CHRNA3_CHRNB4 | 0.03 | Add | 0.85(0.44-1.61) | 6.10E-01 | 1.00E+00 |

|            |                         |          |                 |          |          |
|------------|-------------------------|----------|-----------------|----------|----------|
| rs7180002  | 15 CHRNA5_CHRNA3_CHRNB4 | 0.03 Add | 0.85(0.44-1.61) | 6.10E-01 | 1.00E+00 |
| rs11637635 | 15 CHRNA5_CHRNA3_CHRNB4 | 0.19 Rec | 0.69(0.28-1.7)  | 4.17E-01 | 1.00E+00 |
| rs8040868  | 15 CHRNA5_CHRNA3_CHRNB4 | 0.35 Dom | 0.87(0.63-1.2)  | 4.10E-01 | 1.00E+00 |
| rs7163480  | 15 CHRNA5_CHRNA3_CHRNB4 | 0.07 Dom | 0.88(0.55-1.41) | 5.91E-01 | 1.00E+00 |
| rs16969948 | 15 CHRNA5_CHRNA3_CHRNB4 | 0.07 Dom | 0.9(0.56-1.44)  | 6.49E-01 | 1.00E+00 |
| rs2133965  | 15 CHRNA7               | 0.19 Dom | 0.61(0.43-0.88) | 7.12E-03 | 2.76E-01 |
| rs11071530 | 15 CHRNA7               | 0.19 Dom | 0.62(0.44-0.89) | 9.82E-03 | 3.17E-01 |
| rs1604265  | 15 CHRNA7               | 0.20 Dom | 0.63(0.44-0.89) | 9.56E-03 | 3.46E-01 |
| rs12914788 | 15 CHRNA7               | 0.20 Dom | 0.63(0.44-0.89) | 9.56E-03 | 3.46E-01 |
| rs1514250  | 15 CHRNA7               | 0.20 Dom | 0.63(0.44-0.89) | 9.56E-03 | 3.46E-01 |
| rs982574   | 15 CHRNA7               | 0.20 Dom | 0.63(0.44-0.89) | 9.56E-03 | 3.46E-01 |
| rs1514248  | 15 CHRNA7               | 0.20 Dom | 0.63(0.44-0.89) | 9.56E-03 | 3.47E-01 |
| rs11071532 | 15 CHRNA7               | 0.19 Dom | 0.63(0.44-0.91) | 1.23E-02 | 4.12E-01 |
| rs8027035  | 15 CHRNA7               | 0.19 Dom | 0.63(0.44-0.91) | 1.23E-02 | 4.12E-01 |
| rs12916592 | 15 CHRNA7               | 0.19 Dom | 0.63(0.44-0.91) | 1.23E-02 | 4.12E-01 |
| rs4779969  | 15 CHRNA7               | 0.12 Dom | 0.59(0.38-0.9)  | 1.46E-02 | 4.27E-01 |
| rs4779970  | 15 CHRNA7               | 0.12 Dom | 0.59(0.38-0.9)  | 1.46E-02 | 4.28E-01 |
| rs8027034  | 15 CHRNA7               | 0.12 Dom | 0.59(0.38-0.9)  | 1.48E-02 | 4.33E-01 |
| rs8033518  | 15 CHRNA7               | 0.12 Dom | 0.59(0.38-0.9)  | 1.48E-02 | 4.33E-01 |
| rs6494185  | 15 CHRNA7               | 0.12 Dom | 0.6(0.39-0.91)  | 1.74E-02 | 4.84E-01 |
| rs6494182  | 15 CHRNA7               | 0.12 Dom | 0.6(0.39-0.91)  | 1.74E-02 | 4.84E-01 |
| rs11071512 | 15 CHRNA7               | 0.12 Dom | 0.6(0.39-0.91)  | 1.74E-02 | 4.84E-01 |
| rs11635209 | 15 CHRNA7               | 0.12 Dom | 0.6(0.39-0.91)  | 1.74E-02 | 4.84E-01 |
| rs6494165  | 15 CHRNA7               | 0.12 Dom | 0.6(0.39-0.91)  | 1.74E-02 | 4.84E-01 |
| rs1913459  | 15 CHRNA7               | 0.12 Dom | 0.6(0.39-0.91)  | 1.74E-02 | 4.84E-01 |
| rs8035663  | 15 CHRNA7               | 0.12 Dom | 0.6(0.39-0.91)  | 1.74E-02 | 4.84E-01 |
| rs11071511 | 15 CHRNA7               | 0.12 Dom | 0.6(0.39-0.91)  | 1.74E-02 | 4.85E-01 |
| rs1355920  | 15 CHRNA7               | 0.19 Add | 0.7(0.52-0.95)  | 2.33E-02 | 5.28E-01 |
| rs6494211  | 15 CHRNA7               | 0.39 Dom | 0.72(0.52-1)    | 4.81E-02 | 8.65E-01 |
| rs12438848 | 15 CHRNA7               | 0.35 Dom | 0.73(0.53-1.01) | 6.01E-02 | 9.11E-01 |
| rs7164518  | 15 CHRNA7               | 0.09 Add | 0.71(0.47-1.09) | 1.15E-01 | 9.13E-01 |
| rs8024987  | 15 CHRNA7               | 0.19 Rec | 2.24(0.99-5.07) | 5.37E-02 | 9.18E-01 |
| rs6494223  | 15 CHRNA7               | 0.42 Dom | 0.74(0.53-1.03) | 7.51E-02 | 9.48E-01 |
| rs8028396  | 15 CHRNA7               | 0.42 Dom | 0.74(0.53-1.03) | 7.51E-02 | 9.48E-01 |
| rs8029400  | 15 CHRNA7               | 0.42 Dom | 0.74(0.53-1.03) | 7.51E-02 | 9.48E-01 |
| rs4779565  | 15 CHRNA7               | 0.35 Dom | 0.75(0.54-1.04) | 8.17E-02 | 9.56E-01 |
| rs2337980  | 15 CHRNA7               | 0.26 Rec | 0.56(0.27-1.16) | 1.18E-01 | 9.75E-01 |

|            |           |          |                 |          |          |
|------------|-----------|----------|-----------------|----------|----------|
| rs1392808  | 15 CHRNA7 | 0.01 Add | 1.85(0.75-4.57) | 1.84E-01 | 9.77E-01 |
| rs13329490 | 15 CHRNA7 | 0.01 Add | 1.85(0.75-4.57) | 1.84E-01 | 9.77E-01 |
| rs12440000 | 15 CHRNA7 | 0.01 Add | 1.85(0.75-4.57) | 1.84E-01 | 9.77E-01 |
| rs2221223  | 15 CHRNA7 | 0.01 Add | 1.85(0.75-4.57) | 1.84E-01 | 9.77E-01 |
| rs16956223 | 15 CHRNA7 | 0.01 Add | 1.85(0.75-4.57) | 1.84E-01 | 9.77E-01 |
| rs3826029  | 15 CHRNA7 | 0.39 Add | 0.85(0.67-1.07) | 1.55E-01 | 9.83E-01 |
| rs1514246  | 15 CHRNA7 | 0.21 Rec | 1.81(0.88-3.73) | 1.06E-01 | 9.84E-01 |
| rs7179008  | 15 CHRNA7 | 0.09 Add | 0.78(0.52-1.16) | 2.12E-01 | 9.85E-01 |
| rs7178176  | 15 CHRNA7 | 0.09 Add | 0.78(0.52-1.16) | 2.12E-01 | 9.85E-01 |
| rs12906868 | 15 CHRNA7 | 0.12 Add | 0.75(0.52-1.09) | 1.37E-01 | 9.86E-01 |
| rs4779956  | 15 CHRNA7 | 0.05 Add | 0.72(0.39-1.31) | 2.82E-01 | 9.89E-01 |
| rs904951   | 15 CHRNA7 | 0.30 Rec | 1.47(0.87-2.49) | 1.45E-01 | 9.91E-01 |
| rs8025554  | 15 CHRNA7 | 0.30 Rec | 1.47(0.87-2.49) | 1.45E-01 | 9.91E-01 |
| rs8027814  | 15 CHRNA7 | 0.23 Rec | 1.68(0.84-3.37) | 1.41E-01 | 9.91E-01 |
| rs7175359  | 15 CHRNA7 | 0.30 Rec | 1.47(0.87-2.49) | 1.45E-01 | 9.91E-01 |
| rs7170028  | 15 CHRNA7 | 0.30 Rec | 1.47(0.87-2.49) | 1.45E-01 | 9.91E-01 |
| rs11635941 | 15 CHRNA7 | 0.40 Rec | 0.82(0.53-1.27) | 3.68E-01 | 9.92E-01 |
| rs10438287 | 15 CHRNA7 | 0.04 Dom | 0.74(0.4-1.37)  | 3.31E-01 | 9.93E-01 |
| rs12904275 | 15 CHRNA7 | 0.08 Add | 0.79(0.51-1.23) | 3.00E-01 | 9.93E-01 |
| rs12899561 | 15 CHRNA7 | 0.08 Add | 0.79(0.51-1.23) | 3.00E-01 | 9.93E-01 |
| rs1606659  | 15 CHRNA7 | 0.40 Add | 0.86(0.69-1.09) | 2.08E-01 | 9.93E-01 |
| rs7402321  | 15 CHRNA7 | 0.36 Dom | 0.81(0.58-1.12) | 1.95E-01 | 9.93E-01 |
| rs12915265 | 15 CHRNA7 | 0.04 Dom | 0.74(0.4-1.37)  | 3.31E-01 | 9.94E-01 |
| rs35057608 | 15 CHRNA7 | 0.04 Dom | 0.74(0.4-1.37)  | 3.31E-01 | 9.94E-01 |
| rs1500946  | 15 CHRNA7 | 0.04 Dom | 0.74(0.4-1.37)  | 3.31E-01 | 9.94E-01 |
| rs11852956 | 15 CHRNA7 | 0.04 Dom | 0.74(0.4-1.37)  | 3.31E-01 | 9.94E-01 |
| rs11858834 | 15 CHRNA7 | 0.04 Dom | 0.74(0.4-1.37)  | 3.31E-01 | 9.94E-01 |
| rs11071518 | 15 CHRNA7 | 0.07 Dom | 0.81(0.49-1.33) | 4.07E-01 | 9.94E-01 |
| rs11071515 | 15 CHRNA7 | 0.07 Dom | 0.8(0.49-1.32)  | 3.85E-01 | 9.94E-01 |
| rs7175581  | 15 CHRNA7 | 0.42 Dom | 0.79(0.57-1.11) | 1.75E-01 | 9.94E-01 |
| rs904952   | 15 CHRNA7 | 0.30 Rec | 1.43(0.85-2.41) | 1.77E-01 | 9.94E-01 |
| rs12904458 | 15 CHRNA7 | 0.30 Rec | 1.43(0.85-2.41) | 1.77E-01 | 9.94E-01 |
| rs7179733  | 15 CHRNA7 | 0.20 Rec | 1.68(0.8-3.54)  | 1.70E-01 | 9.94E-01 |
| rs2175886  | 15 CHRNA7 | 0.20 Rec | 1.68(0.8-3.54)  | 1.70E-01 | 9.94E-01 |
| rs885071   | 15 CHRNA7 | 0.39 Dom | 0.8(0.58-1.11)  | 1.79E-01 | 9.94E-01 |
| rs12915695 | 15 CHRNA7 | 0.04 Dom | 0.78(0.43-1.4)  | 4.05E-01 | 9.94E-01 |
| rs4779975  | 15 CHRNA7 | 0.05 Add | 0.76(0.44-1.3)  | 3.12E-01 | 9.95E-01 |

|            |           |          |                 |          |          |
|------------|-----------|----------|-----------------|----------|----------|
| rs8030315  | 15 CHRNA7 | 0.07 Add | 0.9(0.56-1.45)  | 6.76E-01 | 9.95E-01 |
| rs9672321  | 15 CHRNA7 | 0.39 Add | 0.87(0.69-1.09) | 2.22E-01 | 9.95E-01 |
| rs1913456  | 15 CHRNA7 | 0.39 Add | 0.87(0.69-1.09) | 2.22E-01 | 9.95E-01 |
| rs12591836 | 15 CHRNA7 | 0.07 Add | 0.82(0.52-1.29) | 3.83E-01 | 9.95E-01 |
| rs12593470 | 15 CHRNA7 | 0.07 Add | 0.82(0.52-1.29) | 3.83E-01 | 9.95E-01 |
| rs883473   | 15 CHRNA7 | 0.20 Rec | 1.53(0.71-3.31) | 2.74E-01 | 9.95E-01 |
| rs9788679  | 15 CHRNA7 | 0.07 Add | 0.91(0.57-1.46) | 6.94E-01 | 9.96E-01 |
| rs2651417  | 15 CHRNA7 | 0.41 Dom | 0.99(0.71-1.38) | 9.42E-01 | 9.97E-01 |
| rs11637923 | 15 CHRNA7 | 0.40 Rec | 0.86(0.55-1.33) | 4.92E-01 | 9.97E-01 |
| rs4779968  | 15 CHRNA7 | 0.28 Rec | 1.35(0.77-2.37) | 2.98E-01 | 9.97E-01 |
| rs868437   | 15 CHRNA7 | 0.20 Rec | 1.5(0.7-3.21)   | 3.00E-01 | 9.97E-01 |
| rs11071503 | 15 CHRNA7 | 0.28 Rec | 1.26(0.71-2.24) | 4.26E-01 | 9.97E-01 |
| rs4779563  | 15 CHRNA7 | 0.28 Rec | 1.26(0.71-2.24) | 4.26E-01 | 9.97E-01 |
| rs8037484  | 15 CHRNA7 | 0.28 Rec | 1.26(0.71-2.24) | 4.26E-01 | 9.97E-01 |
| rs4779971  | 15 CHRNA7 | 0.28 Rec | 1.26(0.71-2.24) | 4.26E-01 | 9.97E-01 |
| rs12440480 | 15 CHRNA7 | 0.31 Dom | 0.84(0.61-1.15) | 2.77E-01 | 9.98E-01 |
| rs965435   | 15 CHRNA7 | 0.20 Rec | 1.55(0.72-3.35) | 2.60E-01 | 9.98E-01 |
| rs1500948  | 15 CHRNA7 | 0.06 Add | 0.92(0.57-1.48) | 7.29E-01 | 9.98E-01 |
| rs6494212  | 15 CHRNA7 | 0.12 Rec | 0.72(0.15-3.33) | 6.70E-01 | 9.99E-01 |
| rs16956147 | 15 CHRNA7 | 0.07 Dom | 0.89(0.55-1.43) | 6.25E-01 | 9.99E-01 |
| rs12900540 | 15 CHRNA7 | 0.07 Dom | 0.89(0.55-1.43) | 6.29E-01 | 9.99E-01 |
| rs965434   | 15 CHRNA7 | 0.07 Dom | 0.89(0.55-1.43) | 6.29E-01 | 9.99E-01 |
| rs2651418  | 15 CHRNA7 | 0.43 Rec | 1.12(0.75-1.66) | 5.88E-01 | 9.99E-01 |
| rs16956132 | 15 CHRNA7 | 0.07 Dom | 0.9(0.56-1.44)  | 6.53E-01 | 9.99E-01 |
| rs1514247  | 15 CHRNA7 | 0.07 Dom | 0.9(0.56-1.45)  | 6.57E-01 | 9.99E-01 |
| rs6494216  | 15 CHRNA7 | 0.07 Add | 0.99(0.63-1.57) | 9.79E-01 | 1.00E+00 |
| rs9788657  | 15 CHRNA7 | 0.07 Add | 0.96(0.61-1.53) | 8.74E-01 | 1.00E+00 |
| rs8035668  | 15 CHRNA7 | 0.07 Add | 0.96(0.61-1.53) | 8.74E-01 | 1.00E+00 |
| rs8037084  | 15 CHRNA7 | 0.07 Add | 0.96(0.61-1.53) | 8.74E-01 | 1.00E+00 |
| rs8036104  | 15 CHRNA7 | 0.07 Add | 0.96(0.61-1.53) | 8.74E-01 | 1.00E+00 |
| rs10438342 | 15 CHRNA7 | 0.06 Add | 1.01(0.62-1.66) | 9.64E-01 | 1.00E+00 |
| rs2072660  | 1 CHRNB2  | 0.26 Add | 0.77(0.59-1.01) | 5.81E-02 | 5.87E-01 |
| rs2131902  | 1 CHRNB2  | 0.30 Rec | 0.53(0.27-1.03) | 6.27E-02 | 6.13E-01 |
| rs3811450  | 1 CHRNB2  | 0.16 Dom | 0.71(0.49-1.02) | 6.38E-02 | 6.50E-01 |
| rs1127326  | 1 CHRNB2  | 0.29 Add | 0.81(0.63-1.05) | 1.11E-01 | 6.96E-01 |
| rs1127317  | 1 CHRNB2  | 0.29 Add | 0.81(0.63-1.05) | 1.11E-01 | 6.96E-01 |
| rs1127314  | 1 CHRNB2  | 0.29 Add | 0.81(0.63-1.05) | 1.11E-01 | 6.96E-01 |

|            |   |               |      |     |                 |          |          |
|------------|---|---------------|------|-----|-----------------|----------|----------|
| rs11264222 | 1 | CHRNA2        | 0.29 | Add | 0.81(0.63-1.05) | 1.11E-01 | 6.96E-01 |
| rs3766927  | 1 | CHRNA2        | 0.29 | Add | 0.81(0.63-1.05) | 1.11E-01 | 6.96E-01 |
| rs9616     | 1 | CHRNA2        | 0.34 | Rec | 0.73(0.43-1.22) | 2.24E-01 | 8.75E-01 |
| rs2072661  | 1 | CHRNA2        | 0.27 | Dom | 0.79(0.57-1.09) | 1.51E-01 | 8.77E-01 |
| rs6656743  | 1 | CHRNA2        | 0.29 | Add | 0.82(0.64-1.06) | 1.31E-01 | 8.83E-01 |
| rs2072659  | 1 | CHRNA2        | 0.18 | Dom | 0.78(0.55-1.11) | 1.63E-01 | 8.85E-01 |
| rs9427092  | 1 | CHRNA2        | 0.21 | Dom | 1.27(0.92-1.77) | 1.48E-01 | 9.02E-01 |
| rs2072658  | 1 | CHRNA2        | 0.17 | Rec | 0.54(0.2-1.48)  | 2.31E-01 | 9.14E-01 |
| rs4074436  | 1 | CHRNA2        | 0.11 | Dom | 0.93(0.63-1.38) | 7.23E-01 | 9.23E-01 |
| rs7539745  | 1 | CHRNA2        | 0.11 | Add | 0.94(0.66-1.33) | 7.19E-01 | 9.48E-01 |
| rs9427094  | 1 | CHRNA2        | 0.46 | Rec | 0.9(0.6-1.33)   | 5.82E-01 | 9.60E-01 |
| rs1127311  | 1 | CHRNA2        | 0.45 | Add | 0.92(0.74-1.16) | 4.82E-01 | 9.62E-01 |
| rs1127313  | 1 | CHRNA2        | 0.45 | Add | 0.92(0.74-1.16) | 4.88E-01 | 9.64E-01 |
| rs6660775  | 1 | CHRNA2        | 0.13 | Dom | 0.92(0.64-1.34) | 6.75E-01 | 9.75E-01 |
| rs4845652  | 1 | CHRNA2        | 0.13 | Dom | 0.92(0.64-1.34) | 6.75E-01 | 9.75E-01 |
| rs7553602  | 1 | CHRNA2        | 0.11 | Add | 0.91(0.64-1.3)  | 6.05E-01 | 9.88E-01 |
| rs7543174  | 1 | CHRNA2        | 0.13 | Add | 0.93(0.67-1.29) | 6.57E-01 | 9.90E-01 |
| rs16891561 | 8 | CHRNA3_CHRNA6 | 0.24 | Rec | 0.72(0.37-1.42) | 3.47E-01 | 5.55E-01 |
| rs4236926  | 8 | CHRNA3_CHRNA6 | 0.24 | Rec | 0.72(0.37-1.42) | 3.47E-01 | 5.55E-01 |
| rs7017612  | 8 | CHRNA3_CHRNA6 | 0.24 | Rec | 0.72(0.37-1.42) | 3.47E-01 | 5.55E-01 |
| rs7845663  | 8 | CHRNA3_CHRNA6 | 0.24 | Rec | 0.71(0.36-1.38) | 3.07E-01 | 5.64E-01 |
| rs7824155  | 8 | CHRNA3_CHRNA6 | 0.24 | Rec | 0.71(0.36-1.38) | 3.07E-01 | 5.64E-01 |
| rs7812298  | 8 | CHRNA3_CHRNA6 | 0.24 | Rec | 0.71(0.36-1.38) | 3.07E-01 | 5.64E-01 |
| rs892413   | 8 | CHRNA3_CHRNA6 | 0.24 | Rec | 0.71(0.36-1.38) | 3.07E-01 | 5.64E-01 |
| rs9298629  | 8 | CHRNA3_CHRNA6 | 0.24 | Rec | 0.71(0.36-1.38) | 3.07E-01 | 5.64E-01 |
| rs6982753  | 8 | CHRNA3_CHRNA6 | 0.24 | Rec | 0.71(0.36-1.38) | 3.07E-01 | 5.64E-01 |
| rs2196128  | 8 | CHRNA3_CHRNA6 | 0.24 | Rec | 0.72(0.37-1.4)  | 3.32E-01 | 5.91E-01 |
| rs10087172 | 8 | CHRNA3_CHRNA6 | 0.24 | Rec | 0.72(0.37-1.4)  | 3.32E-01 | 5.91E-01 |
| rs10109429 | 8 | CHRNA3_CHRNA6 | 0.24 | Rec | 0.72(0.37-1.4)  | 3.32E-01 | 5.91E-01 |
| rs1072003  | 8 | CHRNA3_CHRNA6 | 0.24 | Rec | 0.72(0.37-1.4)  | 3.32E-01 | 5.91E-01 |
| rs2217732  | 8 | CHRNA3_CHRNA6 | 0.24 | Rec | 0.72(0.37-1.4)  | 3.32E-01 | 5.91E-01 |
| rs13280604 | 8 | CHRNA3_CHRNA6 | 0.23 | Rec | 0.68(0.33-1.41) | 3.06E-01 | 6.29E-01 |
| rs2304297  | 8 | CHRNA3_CHRNA6 | 0.24 | Rec | 0.69(0.35-1.35) | 2.78E-01 | 6.42E-01 |
| rs9298628  | 8 | CHRNA3_CHRNA6 | 0.24 | Rec | 0.7(0.36-1.36)  | 2.92E-01 | 6.61E-01 |
| rs10107450 | 8 | CHRNA3_CHRNA6 | 0.21 | Rec | 0.71(0.36-1.43) | 3.44E-01 | 6.70E-01 |
| rs4950     | 8 | CHRNA3_CHRNA6 | 0.23 | Rec | 0.66(0.32-1.36) | 2.59E-01 | 7.86E-01 |
| rs6474412  | 8 | CHRNA3_CHRNA6 | 0.23 | Rec | 0.66(0.32-1.36) | 2.59E-01 | 7.86E-01 |

|            |    |              |      |     |                 |          |          |
|------------|----|--------------|------|-----|-----------------|----------|----------|
| rs1530848  | 8  | CHRN3_CHRNA6 | 0.23 | Rec | 0.66(0.32-1.36) | 2.59E-01 | 7.86E-01 |
| rs7004381  | 8  | CHRN3_CHRNA6 | 0.23 | Rec | 0.66(0.32-1.36) | 2.59E-01 | 7.86E-01 |
| rs16891569 | 8  | CHRN3_CHRNA6 | 0.02 | Add | 0.7(0.27-1.81)  | 4.63E-01 | 7.95E-01 |
| rs6997909  | 8  | CHRN3_CHRNA6 | 0.23 | Rec | 0.66(0.32-1.37) | 2.69E-01 | 8.00E-01 |
| rs6474415  | 8  | CHRN3_CHRNA6 | 0.23 | Rec | 0.66(0.32-1.37) | 2.69E-01 | 8.00E-01 |
| rs6474414  | 8  | CHRN3_CHRNA6 | 0.23 | Rec | 0.66(0.32-1.37) | 2.69E-01 | 8.00E-01 |
| rs1451239  | 8  | CHRN3_CHRNA6 | 0.23 | Rec | 0.67(0.32-1.38) | 2.72E-01 | 8.01E-01 |
| rs13273442 | 8  | CHRN3_CHRNA6 | 0.23 | Rec | 0.67(0.32-1.38) | 2.72E-01 | 8.02E-01 |
| rs1530847  | 8  | CHRN3_CHRNA6 | 0.23 | Rec | 0.67(0.32-1.38) | 2.72E-01 | 8.02E-01 |
| rs1955185  | 8  | CHRN3_CHRNA6 | 0.23 | Rec | 0.67(0.32-1.38) | 2.72E-01 | 8.02E-01 |
| rs1451240  | 8  | CHRN3_CHRNA6 | 0.23 | Rec | 0.67(0.32-1.38) | 2.72E-01 | 8.02E-01 |
| rs6474419  | 8  | CHRN3_CHRNA6 | 0.22 | Rec | 0.67(0.34-1.34) | 2.59E-01 | 8.19E-01 |
| rs10109040 | 8  | CHRN3_CHRNA6 | 0.22 | Dom | 1.18(0.86-1.63) | 3.10E-01 | 8.53E-01 |
| rs2070368  | 21 | CLIC6        | 0.38 | Rec | 1.5(0.99-2.27)  | 5.30E-02 | 6.47E-01 |
| rs3819041  | 21 | CLIC6        | 0.38 | Rec | 1.5(0.99-2.27)  | 5.30E-02 | 6.47E-01 |
| rs2834599  | 21 | CLIC6        | 0.38 | Rec | 1.49(0.98-2.29) | 6.48E-02 | 7.12E-01 |
| rs2834593  | 21 | CLIC6        | 0.19 | Dom | 1.24(0.89-1.73) | 1.98E-01 | 8.23E-01 |
| rs2070367  | 21 | CLIC6        | 0.20 | Dom | 1.22(0.88-1.7)  | 2.33E-01 | 8.74E-01 |
| rs2834604  | 21 | CLIC6        | 0.26 | Dom | 1.02(0.74-1.41) | 8.96E-01 | 8.96E-01 |
| rs2186287  | 21 | CLIC6        | 0.17 | Rec | 1.17(0.51-2.68) | 7.05E-01 | 9.15E-01 |
| rs6517254  | 21 | CLIC6        | 0.19 | Dom | 1.18(0.85-1.65) | 3.18E-01 | 9.46E-01 |
| rs11088294 | 21 | CLIC6        | 0.27 | Add | 0.91(0.71-1.17) | 4.53E-01 | 9.47E-01 |
| rs2834586  | 21 | CLIC6        | 0.16 | Add | 1.21(0.91-1.62) | 1.89E-01 | 9.62E-01 |
| rs7281533  | 21 | CLIC6        | 0.17 | Rec | 1.28(0.55-2.94) | 5.66E-01 | 9.66E-01 |
| rs2834574  | 21 | CLIC6        | 0.17 | Rec | 1.28(0.55-2.94) | 5.66E-01 | 9.66E-01 |
| rs2236610  | 21 | CLIC6        | 0.16 | Add | 1.21(0.91-1.61) | 1.97E-01 | 9.67E-01 |
| rs2834603  | 21 | CLIC6        | 0.10 | Add | 1.17(0.83-1.66) | 3.68E-01 | 9.71E-01 |
| rs2834601  | 21 | CLIC6        | 0.10 | Add | 1.17(0.83-1.66) | 3.68E-01 | 9.71E-01 |
| rs733014   | 21 | CLIC6        | 0.16 | Add | 1.2(0.9-1.6)    | 2.09E-01 | 9.74E-01 |
| rs717578   | 21 | CLIC6        | 0.16 | Add | 1.2(0.9-1.6)    | 2.09E-01 | 9.74E-01 |
| rs7275340  | 21 | CLIC6        | 0.16 | Add | 1.2(0.9-1.6)    | 2.09E-01 | 9.74E-01 |
| rs1075704  | 21 | CLIC6        | 0.16 | Add | 1.2(0.9-1.6)    | 2.09E-01 | 9.74E-01 |
| rs2834585  | 21 | CLIC6        | 0.16 | Add | 1.2(0.9-1.6)    | 2.09E-01 | 9.74E-01 |
| rs2834579  | 21 | CLIC6        | 0.16 | Add | 1.2(0.9-1.6)    | 2.10E-01 | 9.74E-01 |
| rs2834576  | 21 | CLIC6        | 0.16 | Add | 1.2(0.9-1.6)    | 2.14E-01 | 9.76E-01 |
| rs7281040  | 21 | CLIC6        | 0.16 | Add | 1.2(0.9-1.6)    | 2.14E-01 | 9.77E-01 |
| rs2409531  | 21 | CLIC6        | 0.16 | Add | 1.2(0.9-1.6)    | 2.14E-01 | 9.77E-01 |

|            |          |          |                 |          |          |
|------------|----------|----------|-----------------|----------|----------|
| rs2834577  | 21 CLIC6 | 0.16 Add | 1.2(0.9-1.6)    | 2.14E-01 | 9.77E-01 |
| rs2834575  | 21 CLIC6 | 0.16 Add | 1.2(0.9-1.6)    | 2.14E-01 | 9.77E-01 |
| rs2154444  | 21 CLIC6 | 0.19 Rec | 0.57(0.19-1.68) | 3.11E-01 | 9.79E-01 |
| rs2834587  | 21 CLIC6 | 0.16 Add | 1.2(0.9-1.59)   | 2.23E-01 | 9.80E-01 |
| rs1107470  | 21 CLIC6 | 0.14 Rec | 1.31(0.54-3.18) | 5.50E-01 | 9.81E-01 |
| rs11702251 | 21 CLIC6 | 0.19 Add | 1.18(0.9-1.54)  | 2.31E-01 | 9.82E-01 |
| rs2834591  | 21 CLIC6 | 0.16 Dom | 1.21(0.86-1.7)  | 2.71E-01 | 9.86E-01 |
| rs1557271  | 21 CLIC6 | 0.16 Dom | 1.21(0.86-1.7)  | 2.71E-01 | 9.86E-01 |
| rs2186288  | 21 CLIC6 | 0.16 Dom | 1.21(0.86-1.7)  | 2.71E-01 | 9.86E-01 |
| rs2834578  | 21 CLIC6 | 0.36 Rec | 1.31(0.83-2.07) | 2.46E-01 | 9.87E-01 |
| rs2154443  | 21 CLIC6 | 0.16 Rec | 1.36(0.59-3.16) | 4.69E-01 | 9.87E-01 |
| rs2834572  | 21 CLIC6 | 0.17 Dom | 1.13(0.8-1.59)  | 4.85E-01 | 9.87E-01 |
| rs2834573  | 21 CLIC6 | 0.17 Dom | 1.13(0.8-1.59)  | 4.85E-01 | 9.87E-01 |
| rs806374   | 6 CNR1   | 0.48 Rec | 0.55(0.36-0.84) | 5.93E-03 | 1.47E-01 |
| rs806377   | 6 CNR1   | 0.30 Rec | 1.92(1.17-3.16) | 9.91E-03 | 3.39E-01 |
| rs806368   | 6 CNR1   | 0.49 Rec | 0.62(0.42-0.93) | 1.95E-02 | 3.99E-01 |
| rs806375   | 6 CNR1   | 0.25 Rec | 1.97(1.14-3.4)  | 1.52E-02 | 4.42E-01 |
| rs9444584  | 6 CNR1   | 0.14 Rec | 3.54(1.27-9.83) | 1.53E-02 | 4.72E-01 |
| rs806381   | 6 CNR1   | 0.29 Add | 1.34(1.04-1.72) | 2.24E-02 | 4.75E-01 |
| rs806371   | 6 CNR1   | 0.48 Rec | 0.64(0.43-0.96) | 3.13E-02 | 5.10E-01 |
| rs806372   | 6 CNR1   | 0.48 Rec | 0.65(0.43-0.97) | 3.30E-02 | 5.19E-01 |
| rs806370   | 6 CNR1   | 0.48 Rec | 0.65(0.43-0.97) | 3.30E-02 | 5.19E-01 |
| rs806376   | 6 CNR1   | 0.24 Rec | 1.97(1.1-3.52)  | 2.29E-02 | 5.22E-01 |
| rs806366   | 6 CNR1   | 0.41 Rec | 0.61(0.38-0.97) | 3.86E-02 | 5.45E-01 |
| rs806369   | 6 CNR1   | 0.41 Rec | 0.61(0.38-0.97) | 3.84E-02 | 5.48E-01 |
| rs6454673  | 6 CNR1   | 0.22 Rec | 2.01(1.04-3.91) | 3.89E-02 | 6.74E-01 |
| rs9353525  | 6 CNR1   | 0.45 Rec | 0.68(0.45-1.02) | 6.30E-02 | 6.95E-01 |
| rs806365   | 6 CNR1   | 0.38 Rec | 0.63(0.39-1.03) | 6.51E-02 | 7.06E-01 |
| rs9353524  | 6 CNR1   | 0.45 Rec | 0.68(0.45-1.03) | 6.79E-02 | 7.17E-01 |
| rs7766029  | 6 CNR1   | 0.08 Add | 0.73(0.47-1.14) | 1.68E-01 | 8.13E-01 |
| rs10485171 | 6 CNR1   | 0.08 Add | 0.78(0.5-1.22)  | 2.79E-01 | 8.95E-01 |
| rs2057276  | 6 CNR1   | 0.05 Add | 1.31(0.81-2.12) | 2.64E-01 | 9.04E-01 |
| rs4707436  | 6 CNR1   | 0.08 Add | 0.76(0.49-1.19) | 2.35E-01 | 9.10E-01 |
| rs12528858 | 6 CNR1   | 0.07 Add | 1.3(0.85-2)     | 2.26E-01 | 9.23E-01 |
| rs6938321  | 6 CNR1   | 0.09 Dom | 1.04(0.68-1.58) | 8.72E-01 | 9.33E-01 |
| rs6454672  | 6 CNR1   | 0.02 Add | 1.4(0.63-3.14)  | 4.08E-01 | 9.40E-01 |
| rs7752758  | 6 CNR1   | 0.02 Add | 1.4(0.63-3.14)  | 4.08E-01 | 9.40E-01 |



|            |         |          |                 |          |          |
|------------|---------|----------|-----------------|----------|----------|
| rs1049353  | 6 CNR1  | 0.07 Add | 0.81(0.51-1.3)  | 3.84E-01 | 9.59E-01 |
| rs6928499  | 6 CNR1  | 0.03 Add | 1.09(0.55-2.15) | 8.03E-01 | 9.62E-01 |
| rs9450898  | 6 CNR1  | 0.03 Add | 1.09(0.55-2.15) | 8.03E-01 | 9.62E-01 |
| rs6928813  | 6 CNR1  | 0.03 Add | 1.09(0.55-2.15) | 8.03E-01 | 9.62E-01 |
| rs12205430 | 6 CNR1  | 0.15 Dom | 1.13(0.79-1.61) | 5.12E-01 | 9.66E-01 |
| rs806378   | 6 CNR1  | 0.15 Add | 1.1(0.81-1.5)   | 5.43E-01 | 9.79E-01 |
| rs806379   | 6 CNR1  | 0.18 Rec | 1.43(0.65-3.16) | 3.72E-01 | 9.85E-01 |
| rs2023239  | 6 CNR1  | 0.03 Add | 1.11(0.56-2.19) | 7.68E-01 | 9.90E-01 |
| rs806380   | 6 CNR1  | 0.16 Rec | 1.31(0.55-3.16) | 5.43E-01 | 9.92E-01 |
| rs4485648  | 22 COMT | 0.09 Dom | 1.47(0.97-2.21) | 6.74E-02 | 8.17E-01 |
| rs2239393  | 22 COMT | 0.35 Rec | 1.09(0.68-1.76) | 7.24E-01 | 8.96E-01 |
| rs5993882  | 22 COMT | 0.10 Dom | 1.4(0.94-2.09)  | 1.00E-01 | 9.09E-01 |
| rs5748489  | 22 COMT | 0.30 Dom | 0.75(0.54-1.03) | 7.24E-02 | 9.31E-01 |
| rs5748485  | 22 COMT | 0.30 Dom | 0.75(0.54-1.03) | 7.24E-02 | 9.32E-01 |
| rs5748483  | 22 COMT | 0.30 Dom | 0.75(0.54-1.03) | 7.63E-02 | 9.40E-01 |
| rs6518591  | 22 COMT | 0.09 Dom | 1.38(0.91-2.09) | 1.28E-01 | 9.40E-01 |
| rs5746847  | 22 COMT | 0.30 Dom | 0.75(0.54-1.03) | 7.63E-02 | 9.40E-01 |
| rs7290221  | 22 COMT | 0.42 Dom | 1.35(0.95-1.91) | 9.05E-02 | 9.40E-01 |
| rs5992500  | 22 COMT | 0.09 Dom | 1.36(0.91-2.04) | 1.39E-01 | 9.41E-01 |
| rs9606186  | 22 COMT | 0.30 Dom | 0.75(0.54-1.03) | 7.70E-02 | 9.41E-01 |
| rs9332315  | 22 COMT | 0.04 Dom | 1.55(0.87-2.77) | 1.38E-01 | 9.43E-01 |
| rs5993883  | 22 COMT | 0.39 Dom | 1.33(0.95-1.87) | 9.32E-02 | 9.46E-01 |
| rs2240713  | 22 COMT | 0.03 Add | 0.55(0.23-1.33) | 1.87E-01 | 9.48E-01 |
| rs5993891  | 22 COMT | 0.03 Add | 0.55(0.23-1.33) | 1.87E-01 | 9.48E-01 |
| rs2239395  | 22 COMT | 0.03 Add | 0.55(0.23-1.33) | 1.87E-01 | 9.48E-01 |
| rs758373   | 22 COMT | 0.03 Add | 0.55(0.23-1.33) | 1.87E-01 | 9.48E-01 |
| rs2239394  | 22 COMT | 0.03 Add | 0.55(0.23-1.33) | 1.87E-01 | 9.48E-01 |
| rs6518592  | 22 COMT | 0.30 Dom | 0.76(0.55-1.05) | 9.50E-02 | 9.50E-01 |
| rs1544325  | 22 COMT | 0.30 Dom | 0.76(0.55-1.05) | 9.67E-02 | 9.52E-01 |
| rs8137828  | 22 COMT | 0.32 Dom | 0.77(0.56-1.07) | 1.17E-01 | 9.74E-01 |
| rs5746848  | 22 COMT | 0.32 Dom | 0.77(0.56-1.07) | 1.17E-01 | 9.74E-01 |
| rs5746846  | 22 COMT | 0.31 Dom | 0.78(0.56-1.07) | 1.24E-01 | 9.76E-01 |
| rs740603   | 22 COMT | 0.42 Dom | 1.31(0.93-1.85) | 1.25E-01 | 9.77E-01 |
| rs4646312  | 22 COMT | 0.34 Dom | 0.95(0.69-1.31) | 7.41E-01 | 9.82E-01 |
| rs8185002  | 22 COMT | 0.28 Add | 1.05(0.81-1.35) | 7.31E-01 | 9.86E-01 |
| rs1110478  | 22 COMT | 0.49 Dom | 0.77(0.54-1.09) | 1.40E-01 | 9.86E-01 |
| rs887200   | 22 COMT | 0.49 Dom | 0.77(0.54-1.09) | 1.42E-01 | 9.87E-01 |

|            |         |          |                 |          |          |
|------------|---------|----------|-----------------|----------|----------|
| rs2518824  | 22 COMT | 0.49 Dom | 0.77(0.54-1.09) | 1.42E-01 | 9.87E-01 |
| rs5748484  | 22 COMT | 0.29 Add | 1.08(0.84-1.38) | 5.50E-01 | 9.87E-01 |
| rs8140265  | 22 COMT | 0.29 Add | 1.08(0.84-1.38) | 5.50E-01 | 9.87E-01 |
| rs9605031  | 22 COMT | 0.29 Add | 1.08(0.84-1.38) | 5.50E-01 | 9.87E-01 |
| rs887199   | 22 COMT | 0.49 Dom | 0.77(0.54-1.09) | 1.44E-01 | 9.88E-01 |
| rs2020917  | 22 COMT | 0.29 Add | 1.07(0.83-1.37) | 5.90E-01 | 9.88E-01 |
| rs9605030  | 22 COMT | 0.29 Dom | 1.13(0.82-1.55) | 4.66E-01 | 9.90E-01 |
| rs2518823  | 22 COMT | 0.50 Rec | 1.3(0.91-1.86)  | 1.53E-01 | 9.91E-01 |
| rs9606189  | 22 COMT | 0.29 Dom | 1.12(0.82-1.55) | 4.77E-01 | 9.91E-01 |
| rs165599   | 22 COMT | 0.49 Dom | 0.78(0.54-1.11) | 1.60E-01 | 9.92E-01 |
| rs737866   | 22 COMT | 0.28 Rec | 1.12(0.63-1.99) | 7.04E-01 | 9.94E-01 |
| rs737865   | 22 COMT | 0.28 Rec | 1.12(0.63-1.99) | 7.04E-01 | 9.94E-01 |
| rs11705619 | 22 COMT | 0.02 Dom | 0.79(0.32-1.97) | 6.12E-01 | 9.95E-01 |
| rs165824   | 22 COMT | 0.49 Rec | 1.28(0.89-1.84) | 1.90E-01 | 9.97E-01 |
| rs4680     | 22 COMT | 0.26 Add | 0.85(0.65-1.11) | 2.28E-01 | 9.97E-01 |
| rs165815   | 22 COMT | 0.49 Dom | 0.79(0.55-1.13) | 1.94E-01 | 9.97E-01 |
| rs174697   | 22 COMT | 0.39 Rec | 1.11(0.72-1.72) | 6.32E-01 | 9.98E-01 |
| rs1110479  | 22 COMT | 0.41 Rec | 1.3(0.87-1.94)  | 2.06E-01 | 9.98E-01 |
| rs1110477  | 22 COMT | 0.42 Rec | 1.3(0.87-1.94)  | 2.06E-01 | 9.98E-01 |
| rs10483103 | 22 COMT | 0.31 Dom | 0.86(0.63-1.19) | 3.68E-01 | 9.98E-01 |
| rs2871047  | 22 COMT | 0.31 Dom | 0.86(0.63-1.19) | 3.68E-01 | 9.98E-01 |
| rs174673   | 22 COMT | 0.32 Rec | 1.27(0.77-2.08) | 3.48E-01 | 9.99E-01 |
| rs165656   | 22 COMT | 0.25 Add | 0.85(0.65-1.11) | 2.32E-01 | 9.99E-01 |
| rs174674   | 22 COMT | 0.41 Dom | 1.1(0.79-1.54)  | 5.76E-01 | 9.99E-01 |
| rs6267     | 22 COMT | 0.03 Add | 1.29(0.68-2.45) | 4.30E-01 | 9.99E-01 |
| rs174696   | 22 COMT | 0.46 Dom | 0.83(0.59-1.17) | 2.89E-01 | 9.99E-01 |
| rs933271   | 22 COMT | 0.42 Add | 1.11(0.88-1.39) | 3.79E-01 | 9.99E-01 |
| rs165728   | 22 COMT | 0.41 Rec | 1.26(0.84-1.88) | 2.69E-01 | 9.99E-01 |
| rs174699   | 22 COMT | 0.41 Rec | 1.26(0.84-1.88) | 2.69E-01 | 9.99E-01 |
| rs165774   | 22 COMT | 0.13 Dom | 0.8(0.54-1.17)  | 2.48E-01 | 9.99E-01 |
| rs4633     | 22 COMT | 0.25 Add | 0.86(0.66-1.13) | 2.83E-01 | 9.99E-01 |
| rs174675   | 22 COMT | 0.42 Dom | 1.11(0.79-1.56) | 5.38E-01 | 9.99E-01 |
| rs4646310  | 22 COMT | 0.02 Dom | 0.74(0.3-1.84)  | 5.19E-01 | 9.99E-01 |
| rs12627876 | 22 COMT | 0.07 Dom | 1.17(0.74-1.86) | 5.06E-01 | 1.00E+00 |
| rs4646316  | 22 COMT | 0.33 Rec | 1.27(0.78-2.09) | 3.35E-01 | 1.00E+00 |
| rs2551640  | 2 CREB1 | 0.38 Rec | 0.57(0.35-0.94) | 2.73E-02 | 1.28E-01 |
| rs10932201 | 2 CREB1 | 0.39 Rec | 0.6(0.37-0.98)  | 4.11E-02 | 1.91E-01 |

|            |           |          |                 |          |          |
|------------|-----------|----------|-----------------|----------|----------|
| rs7369949  | 2 CREB1   | 0.39 Rec | 0.6(0.37-0.99)  | 4.36E-02 | 1.99E-01 |
| rs11904814 | 2 CREB1   | 0.39 Rec | 0.6(0.37-0.99)  | 4.36E-02 | 1.99E-01 |
| rs2254137  | 2 CREB1   | 0.39 Rec | 0.6(0.37-0.99)  | 4.36E-02 | 1.99E-01 |
| rs6740584  | 2 CREB1   | 0.39 Rec | 0.6(0.37-0.99)  | 4.36E-02 | 1.99E-01 |
| rs2551645  | 2 CREB1   | 0.39 Rec | 0.6(0.37-0.99)  | 4.36E-02 | 1.99E-01 |
| rs2253206  | 2 CREB1   | 0.39 Rec | 0.62(0.39-1.01) | 5.59E-02 | 2.43E-01 |
| rs3770704  | 2 CREB1   | 0.24 Rec | 0.61(0.28-1.33) | 2.13E-01 | 5.77E-01 |
| rs16839883 | 2 CREB1   | 0.24 Rec | 0.61(0.28-1.33) | 2.13E-01 | 5.77E-01 |
| rs7569963  | 2 CREB1   | 0.14 Rec | 0.75(0.21-2.67) | 6.53E-01 | 8.74E-01 |
| rs8052927  | 16 CREBBP | 0.22 Rec | 0.32(0.11-0.92) | 3.51E-02 | 4.80E-01 |
| rs8047652  | 16 CREBBP | 0.22 Rec | 0.35(0.12-1.02) | 5.42E-02 | 6.82E-01 |
| rs2526691  | 16 CREBBP | 0.22 Rec | 0.36(0.12-1.05) | 6.08E-02 | 7.33E-01 |
| rs3025684  | 16 CREBBP | 0.22 Rec | 0.36(0.12-1.06) | 6.40E-02 | 7.52E-01 |
| rs11864123 | 16 CREBBP | 0.22 Rec | 0.42(0.16-1.12) | 8.21E-02 | 8.64E-01 |
| rs12599202 | 16 CREBBP | 0.04 Add | 0.61(0.32-1.18) | 1.41E-01 | 8.76E-01 |
| rs7202140  | 16 CREBBP | 0.23 Rec | 0.43(0.16-1.15) | 9.36E-02 | 8.95E-01 |
| rs129968   | 16 CREBBP | 0.43 Rec | 0.98(0.65-1.48) | 9.19E-01 | 9.19E-01 |
| rs2191416  | 16 CREBBP | 0.37 Rec | 0.68(0.41-1.12) | 1.31E-01 | 9.80E-01 |
| rs2239317  | 16 CREBBP | 0.29 Add | 1.05(0.82-1.34) | 6.98E-01 | 9.84E-01 |
| rs11644593 | 16 CREBBP | 0.29 Rec | 1.05(0.6-1.84)  | 8.57E-01 | 9.95E-01 |
| rs129993   | 16 CREBBP | 0.19 Rec | 0.49(0.17-1.48) | 2.07E-01 | 9.97E-01 |
| rs8044812  | 16 CREBBP | 0.02 Dom | 1.16(0.46-2.9)  | 7.54E-01 | 9.98E-01 |
| rs130052   | 16 CREBBP | 0.30 Add | 1.07(0.84-1.36) | 5.98E-01 | 9.98E-01 |
| rs130051   | 16 CREBBP | 0.19 Rec | 0.51(0.17-1.52) | 2.27E-01 | 9.99E-01 |
| rs129982   | 16 CREBBP | 0.19 Rec | 0.51(0.17-1.54) | 2.35E-01 | 9.99E-01 |
| rs13334803 | 16 CREBBP | 0.02 Add | 0.7(0.31-1.59)  | 3.97E-01 | 9.99E-01 |
| rs13380693 | 16 CREBBP | 0.23 Rec | 0.6(0.26-1.39)  | 2.31E-01 | 9.99E-01 |
| rs130046   | 16 CREBBP | 0.02 Add | 0.71(0.31-1.6)  | 4.05E-01 | 9.99E-01 |
| rs6500553  | 16 CREBBP | 0.02 Add | 0.71(0.31-1.6)  | 4.10E-01 | 9.99E-01 |
| rs130037   | 16 CREBBP | 0.02 Add | 0.71(0.31-1.6)  | 4.10E-01 | 9.99E-01 |
| rs3025697  | 16 CREBBP | 0.02 Add | 0.71(0.31-1.6)  | 4.10E-01 | 9.99E-01 |
| rs9936092  | 16 CREBBP | 0.02 Add | 0.71(0.31-1.6)  | 4.10E-01 | 9.99E-01 |
| rs130028   | 16 CREBBP | 0.02 Add | 0.71(0.31-1.6)  | 4.10E-01 | 9.99E-01 |
| rs129963   | 16 CREBBP | 0.14 Rec | 0.68(0.18-2.48) | 5.54E-01 | 9.99E-01 |
| rs2526687  | 16 CREBBP | 0.02 Add | 0.72(0.32-1.62) | 4.22E-01 | 1.00E+00 |
| rs2540044  | 16 CREBBP | 0.02 Add | 0.72(0.32-1.62) | 4.22E-01 | 1.00E+00 |
| rs6500556  | 16 CREBBP | 0.02 Add | 0.72(0.32-1.64) | 4.35E-01 | 1.00E+00 |

|            |           |          |                  |          |          |
|------------|-----------|----------|------------------|----------|----------|
| rs9921319  | 16 CREBBP | 0.02 Add | 0.72(0.32-1.64)  | 4.35E-01 | 1.00E+00 |
| rs129984   | 16 CREBBP | 0.19 Rec | 0.73(0.26-2.02)  | 5.46E-01 | 1.00E+00 |
| rs9940938  | 16 CREBBP | 0.02 Add | 0.76(0.33-1.73)  | 5.12E-01 | 1.00E+00 |
| rs2239318  | 16 CREBBP | 0.29 Rec | 1.08(0.62-1.9)   | 7.81E-01 | 1.00E+00 |
| rs2072381  | 16 CREBBP | 0.10 Add | 1.16(0.8-1.69)   | 4.33E-01 | 1.00E+00 |
| rs13332076 | 16 CREBBP | 0.01 Add | 1.19(0.47-2.99)  | 7.14E-01 | 1.00E+00 |
| rs130025   | 16 CREBBP | 0.02 Add | 0.75(0.33-1.72)  | 5.01E-01 | 1.00E+00 |
| rs8046065  | 16 CREBBP | 0.06 Add | 1.19(0.75-1.88)  | 4.60E-01 | 1.00E+00 |
| rs129985   | 16 CREBBP | 0.01 Add | 1.36(0.53-3.49)  | 5.25E-01 | 1.00E+00 |
| rs4567717  | 16 CREBBP | 0.02 Add | 0.78(0.36-1.7)   | 5.34E-01 | 1.00E+00 |
| rs130018   | 16 CREBBP | 0.02 Add | 1.16(0.47-2.9)   | 7.46E-01 | 1.00E+00 |
| rs1296721  | 16 CREBBP | 0.02 Add | 1.16(0.47-2.9)   | 7.46E-01 | 1.00E+00 |
| rs130030   | 16 CREBBP | 0.02 Add | 1.16(0.47-2.9)   | 7.46E-01 | 1.00E+00 |
| rs8055118  | 16 CREBBP | 0.02 Add | 1.16(0.47-2.9)   | 7.46E-01 | 1.00E+00 |
| rs130045   | 16 CREBBP | 0.02 Add | 1.16(0.47-2.9)   | 7.46E-01 | 1.00E+00 |
| rs3025702  | 16 CREBBP | 0.02 Add | 1.16(0.47-2.9)   | 7.46E-01 | 1.00E+00 |
| rs130007   | 16 CREBBP | 0.01 Add | 1.36(0.53-3.49)  | 5.25E-01 | 1.00E+00 |
| rs130006   | 16 CREBBP | 0.01 Add | 1.36(0.53-3.49)  | 5.25E-01 | 1.00E+00 |
| rs130005   | 16 CREBBP | 0.30 Rec | 1.1(0.63-1.9)    | 7.37E-01 | 1.00E+00 |
| rs2110534  | 16 CREBBP | 0.02 Add | 0.78(0.34-1.78)  | 5.61E-01 | 1.00E+00 |
| rs886528   | 16 CREBBP | 0.44 Rec | 0.88(0.58-1.32)  | 5.32E-01 | 1.00E+00 |
| rs11076786 | 16 CREBBP | 0.19 Dom | 1.14(0.82-1.58)  | 4.40E-01 | 1.00E+00 |
| rs9392     | 16 CREBBP | 0.42 Rec | 0.86(0.56-1.31)  | 4.73E-01 | 1.00E+00 |
| rs12051375 | 16 CREBBP | 0.21 Rec | 0.7(0.28-1.75)   | 4.47E-01 | 1.00E+00 |
| rs2540038  | 16 CREBBP | 0.02 Add | 0.8(0.35-1.82)   | 5.92E-01 | 1.00E+00 |
| rs2239316  | 16 CREBBP | 0.34 Rec | 0.77(0.44-1.34)  | 3.54E-01 | 1.00E+00 |
| rs130021   | 16 CREBBP | 0.40 Add | 1.08(0.86-1.36)  | 4.99E-01 | 1.00E+00 |
| rs2283480  | 16 CREBBP | 0.12 Rec | 0.51(0.11-2.42)  | 3.96E-01 | 1.00E+00 |
| rs3789033  | 16 CREBBP | 0.12 Rec | 0.51(0.11-2.42)  | 3.96E-01 | 1.00E+00 |
| rs9931922  | 16 CREBBP | 0.15 Rec | 0.54(0.11-2.6)   | 4.43E-01 | 1.00E+00 |
| rs9302779  | 16 CREBBP | 0.20 Rec | 0.67(0.24-1.82)  | 4.30E-01 | 1.00E+00 |
| rs9929384  | 16 CREBBP | 0.02 Add | 0.82(0.36-1.89)  | 6.46E-01 | 1.00E+00 |
| rs130002   | 16 CREBBP | 0.21 Add | 0.92(0.69-1.22)  | 5.67E-01 | 1.00E+00 |
| rs12953076 | 17 CRHR1  | 0.11 Rec | 4.28(1.43-12.8)  | 9.40E-03 | 1.51E-01 |
| rs4076452  | 17 CRHR1  | 0.12 Rec | 3.58(1.27-10.08) | 1.57E-02 | 2.39E-01 |
| rs4074461  | 17 CRHR1  | 0.12 Rec | 3.2(1.17-8.75)   | 2.35E-02 | 3.20E-01 |
| rs171440   | 17 CRHR1  | 0.12 Add | 1.35(0.97-1.88)  | 7.14E-02 | 5.74E-01 |

|            |          |          |                 |          |          |
|------------|----------|----------|-----------------|----------|----------|
| rs81189    | 17 CRHR1 | 0.12 Add | 1.35(0.97-1.88) | 7.14E-02 | 5.75E-01 |
| rs173365   | 17 CRHR1 | 0.10 Add | 1.32(0.91-1.9)  | 1.38E-01 | 5.93E-01 |
| rs242924   | 17 CRHR1 | 0.08 Add | 1.3(0.86-1.96)  | 2.14E-01 | 6.78E-01 |
| rs110402   | 17 CRHR1 | 0.10 Add | 1.25(0.88-1.79) | 2.18E-01 | 7.20E-01 |
| rs7209436  | 17 CRHR1 | 0.10 Add | 1.25(0.87-1.78) | 2.26E-01 | 7.30E-01 |
| rs242942   | 17 CRHR1 | 0.01 Add | 1.47(0.56-3.88) | 4.38E-01 | 8.59E-01 |
| rs3785877  | 17 CRHR1 | 0.01 Add | 1.47(0.56-3.88) | 4.38E-01 | 8.59E-01 |
| rs12944712 | 17 CRHR1 | 0.10 Add | 1.18(0.82-1.69) | 3.72E-01 | 9.01E-01 |
| rs17689966 | 17 CRHR1 | 0.19 Dom | 1.05(0.75-1.47) | 7.67E-01 | 9.46E-01 |
| rs242944   | 17 CRHR1 | 0.20 Rec | 0.93(0.39-2.24) | 8.72E-01 | 9.83E-01 |
| rs17763658 | 17 CRHR1 | 0.16 Dom | 1.06(0.75-1.5)  | 7.42E-01 | 9.89E-01 |
| rs129915   | 9 DBH    | 0.44 Dom | 0.69(0.49-0.97) | 3.36E-02 | 8.39E-01 |
| rs2097629  | 9 DBH    | 0.44 Rec | 1.06(0.71-1.58) | 7.92E-01 | 9.56E-01 |
| rs732833   | 9 DBH    | 0.45 Rec | 1.02(0.68-1.52) | 9.24E-01 | 9.73E-01 |
| rs1611125  | 9 DBH    | 0.16 Dom | 0.74(0.51-1.06) | 1.03E-01 | 9.91E-01 |
| rs1611123  | 9 DBH    | 0.13 Dom | 0.73(0.49-1.08) | 1.10E-01 | 9.93E-01 |
| rs3025369  | 9 DBH    | 0.18 Add | 0.94(0.69-1.28) | 6.90E-01 | 9.94E-01 |
| rs7851898  | 9 DBH    | 0.47 Rec | 1.34(0.93-1.94) | 1.17E-01 | 9.97E-01 |
| rs1611122  | 9 DBH    | 0.15 Dom | 0.75(0.52-1.09) | 1.29E-01 | 9.97E-01 |
| rs3025425  | 9 DBH    | 0.08 Dom | 1.29(0.86-1.95) | 2.18E-01 | 9.98E-01 |
| rs1108580  | 9 DBH    | 0.15 Add | 0.79(0.57-1.09) | 1.45E-01 | 9.98E-01 |
| rs1108581  | 9 DBH    | 0.16 Add | 0.8(0.58-1.1)   | 1.73E-01 | 9.99E-01 |
| rs1548364  | 9 DBH    | 0.16 Add | 0.79(0.57-1.09) | 1.57E-01 | 9.99E-01 |
| rs2073833  | 9 DBH    | 0.46 Dom | 0.94(0.66-1.34) | 7.36E-01 | 9.99E-01 |
| rs1611120  | 9 DBH    | 0.13 Dom | 0.75(0.51-1.12) | 1.59E-01 | 9.99E-01 |
| rs2873804  | 9 DBH    | 0.16 Add | 0.79(0.58-1.1)  | 1.61E-01 | 9.99E-01 |
| rs3025406  | 9 DBH    | 0.14 Dom | 0.77(0.52-1.12) | 1.68E-01 | 1.00E+00 |
| rs2519148  | 9 DBH    | 0.41 Dom | 0.82(0.59-1.14) | 2.29E-01 | 1.00E+00 |
| rs129884   | 9 DBH    | 0.36 Dom | 0.93(0.67-1.28) | 6.39E-01 | 1.00E+00 |
| rs10993885 | 9 DBH    | 0.43 Rec | 1.28(0.86-1.88) | 2.21E-01 | 1.00E+00 |
| rs129882   | 9 DBH    | 0.36 Dom | 0.92(0.66-1.27) | 6.04E-01 | 1.00E+00 |
| rs129886   | 9 DBH    | 0.38 Dom | 0.9(0.65-1.26)  | 5.50E-01 | 1.00E+00 |
| rs129885   | 9 DBH    | 0.38 Dom | 0.92(0.67-1.28) | 6.38E-01 | 1.00E+00 |
| rs2519154  | 9 DBH    | 0.11 Rec | 1.15(0.36-3.66) | 8.17E-01 | 1.00E+00 |
| rs1611119  | 9 DBH    | 0.02 Add | 0.63(0.21-1.86) | 4.02E-01 | 1.00E+00 |
| rs12337651 | 9 DBH    | 0.03 Dom | 0.87(0.4-1.88)  | 7.18E-01 | 1.00E+00 |
| rs6479643  | 9 DBH    | 0.28 Dom | 1.14(0.82-1.57) | 4.33E-01 | 1.00E+00 |

|            |       |          |                 |          |          |
|------------|-------|----------|-----------------|----------|----------|
| rs77905    | 9 DBH | 0.09 Dom | 1.14(0.76-1.71) | 5.32E-01 | 1.00E+00 |
| rs5320     | 9 DBH | 0.13 Dom | 0.85(0.58-1.25) | 4.15E-01 | 1.00E+00 |
| rs3739885  | 9 DBH | 0.02 Add | 0.9(0.4-2.03)   | 7.93E-01 | 1.00E+00 |
| rs3025422  | 9 DBH | 0.10 Dom | 1.21(0.82-1.79) | 3.43E-01 | 1.00E+00 |
| rs10993949 | 9 DBH | 0.10 Dom | 1.21(0.82-1.79) | 3.43E-01 | 1.00E+00 |
| rs1611115  | 9 DBH | 0.15 Dom | 1.25(0.88-1.79) | 2.14E-01 | 1.00E+00 |
| rs2519147  | 9 DBH | 0.03 Add | 1.14(0.58-2.26) | 6.99E-01 | 1.00E+00 |
| rs3025382  | 9 DBH | 0.02 Add | 0.77(0.33-1.79) | 5.40E-01 | 1.00E+00 |
| rs2073835  | 9 DBH | 0.39 Rec | 1.25(0.81-1.91) | 3.14E-01 | 1.00E+00 |
| rs2007153  | 9 DBH | 0.31 Dom | 0.85(0.62-1.17) | 3.15E-01 | 1.00E+00 |
| rs1611114  | 9 DBH | 0.31 Dom | 0.89(0.64-1.23) | 4.72E-01 | 1.00E+00 |
| rs3025373  | 9 DBH | 0.07 Add | 0.81(0.5-1.32)  | 4.01E-01 | 1.00E+00 |
| rs1541332  | 9 DBH | 0.03 Add | 0.86(0.45-1.65) | 6.47E-01 | 1.00E+00 |
| rs2519143  | 9 DBH | 0.15 Dom | 1.21(0.84-1.72) | 3.03E-01 | 1.00E+00 |
| rs1611118  | 9 DBH | 0.03 Add | 0.78(0.37-1.67) | 5.29E-01 | 1.00E+00 |
| rs129888   | 9 DBH | 0.39 Rec | 1.27(0.83-1.95) | 2.69E-01 | 1.00E+00 |
| rs129928   | 9 DBH | 0.39 Rec | 1.27(0.83-1.95) | 2.69E-01 | 1.00E+00 |
| rs129930   | 9 DBH | 0.17 Rec | 1.62(0.67-3.92) | 2.85E-01 | 1.00E+00 |
| rs1541333  | 9 DBH | 0.11 Dom | 0.8(0.53-1.19)  | 2.69E-01 | 1.00E+00 |
| rs3025399  | 9 DBH | 0.10 Add | 0.92(0.63-1.33) | 6.43E-01 | 1.00E+00 |
| rs2283124  | 9 DBH | 0.15 Dom | 0.8(0.55-1.16)  | 2.34E-01 | 1.00E+00 |
| rs1548367  | 9 DBH | 0.03 Add | 0.83(0.39-1.79) | 6.43E-01 | 1.00E+00 |
| rs10993950 | 9 DBH | 0.05 Dom | 1.22(0.74-2.03) | 4.31E-01 | 1.00E+00 |
| rs13306304 | 9 DBH | 0.17 Dom | 0.87(0.61-1.24) | 4.37E-01 | 1.00E+00 |
| rs2097628  | 9 DBH | 0.08 Add | 0.81(0.51-1.31) | 3.93E-01 | 1.00E+00 |
| rs2283123  | 9 DBH | 0.15 Dom | 0.8(0.55-1.16)  | 2.46E-01 | 1.00E+00 |
| rs10993948 | 9 DBH | 0.09 Dom | 1.08(0.72-1.62) | 7.17E-01 | 1.00E+00 |
| rs129931   | 9 DBH | 0.23 Rec | 1.39(0.7-2.75)  | 3.42E-01 | 1.00E+00 |
| rs3025388  | 9 DBH | 0.16 Add | 0.84(0.61-1.15) | 2.76E-01 | 1.00E+00 |
| rs1076152  | 9 DBH | 0.24 Rec | 1.41(0.75-2.64) | 2.80E-01 | 1.00E+00 |
| rs1076150  | 9 DBH | 0.09 Add | 0.83(0.55-1.26) | 3.83E-01 | 1.00E+00 |
| rs1076153  | 9 DBH | 0.33 Rec | 1.29(0.8-2.08)  | 2.89E-01 | 1.00E+00 |
| rs4947511  | 7 DDC | 0.07 Add | 1.5(1.01-2.22)  | 4.52E-02 | 7.83E-01 |
| rs11575413 | 7 DDC | 0.07 Dom | 1.48(0.96-2.29) | 7.55E-02 | 8.66E-01 |
| rs6951648  | 7 DDC | 0.02 Dom | 0.49(0.19-1.27) | 1.41E-01 | 9.32E-01 |
| rs17133881 | 7 DDC | 0.02 Dom | 0.48(0.18-1.26) | 1.39E-01 | 9.44E-01 |
| rs11575506 | 7 DDC | 0.08 Dom | 1.39(0.92-2.08) | 1.15E-01 | 9.44E-01 |

|            |       |          |                 |          |          |
|------------|-------|----------|-----------------|----------|----------|
| rs4947576  | 7 DDC | 0.07 Dom | 1.42(0.91-2.21) | 1.21E-01 | 9.52E-01 |
| rs4948197  | 7 DDC | 0.07 Dom | 1.42(0.91-2.21) | 1.21E-01 | 9.52E-01 |
| rs17665588 | 7 DDC | 0.07 Dom | 1.42(0.91-2.21) | 1.21E-01 | 9.52E-01 |
| rs3779076  | 7 DDC | 0.07 Dom | 1.41(0.92-2.16) | 1.18E-01 | 9.64E-01 |
| rs3779075  | 7 DDC | 0.07 Dom | 1.41(0.92-2.16) | 1.18E-01 | 9.64E-01 |
| rs1007749  | 7 DDC | 0.07 Dom | 1.38(0.88-2.16) | 1.58E-01 | 9.80E-01 |
| rs1007702  | 7 DDC | 0.07 Dom | 1.38(0.88-2.16) | 1.58E-01 | 9.80E-01 |
| rs17665670 | 7 DDC | 0.07 Dom | 1.38(0.88-2.16) | 1.58E-01 | 9.80E-01 |
| rs1817073  | 7 DDC | 0.07 Dom | 1.38(0.88-2.16) | 1.58E-01 | 9.80E-01 |
| rs12535024 | 7 DDC | 0.07 Dom | 1.38(0.9-2.13)  | 1.43E-01 | 9.81E-01 |
| rs11772714 | 7 DDC | 0.40 Dom | 1.33(0.95-1.87) | 9.90E-02 | 9.89E-01 |
| rs4948201  | 7 DDC | 0.07 Add | 1.32(0.88-1.99) | 1.76E-01 | 9.93E-01 |
| rs11238131 | 7 DDC | 0.49 Rec | 0.73(0.49-1.08) | 1.12E-01 | 9.93E-01 |
| rs2167364  | 7 DDC | 0.12 Dom | 0.72(0.47-1.09) | 1.16E-01 | 9.93E-01 |
| rs1037351  | 7 DDC | 0.12 Dom | 0.72(0.47-1.09) | 1.16E-01 | 9.93E-01 |
| rs4947594  | 7 DDC | 0.07 Dom | 1.34(0.86-2.09) | 1.91E-01 | 9.95E-01 |
| rs11575548 | 7 DDC | 0.09 Add | 0.78(0.51-1.18) | 2.36E-01 | 9.95E-01 |
| rs17634717 | 7 DDC | 0.09 Add | 0.78(0.51-1.18) | 2.36E-01 | 9.95E-01 |
| rs7803440  | 7 DDC | 0.42 Rec | 1(0.67-1.49)    | 9.96E-01 | 9.96E-01 |
| rs7803788  | 7 DDC | 0.42 Rec | 1(0.67-1.49)    | 9.96E-01 | 9.96E-01 |
| rs11771860 | 7 DDC | 0.03 Dom | 0.61(0.27-1.4)  | 2.44E-01 | 9.97E-01 |
| rs2167363  | 7 DDC | 0.03 Dom | 0.61(0.27-1.4)  | 2.44E-01 | 9.97E-01 |
| rs11763051 | 7 DDC | 0.03 Dom | 0.61(0.27-1.4)  | 2.44E-01 | 9.97E-01 |
| rs4947631  | 7 DDC | 0.03 Dom | 0.61(0.27-1.4)  | 2.44E-01 | 9.97E-01 |
| rs4245549  | 7 DDC | 0.03 Dom | 0.61(0.27-1.4)  | 2.44E-01 | 9.97E-01 |
| rs4490786  | 7 DDC | 0.15 Add | 0.78(0.56-1.09) | 1.46E-01 | 9.98E-01 |
| rs731689   | 7 DDC | 0.08 Add | 1.24(0.84-1.83) | 2.76E-01 | 9.99E-01 |
| rs11575387 | 7 DDC | 0.02 Add | 0.6(0.23-1.6)   | 3.07E-01 | 9.99E-01 |
| rs17133853 | 7 DDC | 0.02 Add | 0.6(0.23-1.6)   | 3.07E-01 | 9.99E-01 |
| rs7791875  | 7 DDC | 0.02 Add | 0.6(0.23-1.6)   | 3.07E-01 | 9.99E-01 |
| rs880028   | 7 DDC | 0.12 Dom | 0.74(0.49-1.12) | 1.59E-01 | 9.99E-01 |
| rs3779084  | 7 DDC | 0.12 Add | 0.76(0.52-1.12) | 1.66E-01 | 9.99E-01 |
| rs7792474  | 7 DDC | 0.07 Add | 1.23(0.83-1.83) | 2.95E-01 | 9.99E-01 |
| rs17665398 | 7 DDC | 0.07 Add | 1.23(0.83-1.83) | 2.95E-01 | 9.99E-01 |
| rs17152020 | 7 DDC | 0.15 Add | 0.8(0.57-1.11)  | 1.76E-01 | 9.99E-01 |
| rs11575288 | 7 DDC | 0.14 Add | 0.83(0.59-1.17) | 2.76E-01 | 9.99E-01 |
| rs745043   | 7 DDC | 0.41 Dom | 1.27(0.9-1.78)  | 1.74E-01 | 9.99E-01 |

|            |       |          |                 |          |          |
|------------|-------|----------|-----------------|----------|----------|
| rs745042   | 7 DDC | 0.41 Dom | 1.27(0.9-1.78)  | 1.74E-01 | 9.99E-01 |
| rs1107743  | 7 DDC | 0.10 Dom | 0.81(0.52-1.26) | 3.53E-01 | 1.00E+00 |
| rs2329367  | 7 DDC | 0.10 Dom | 0.81(0.52-1.26) | 3.53E-01 | 1.00E+00 |
| rs2122817  | 7 DDC | 0.10 Dom | 0.81(0.52-1.26) | 3.53E-01 | 1.00E+00 |
| rs4602840  | 7 DDC | 0.10 Dom | 0.81(0.52-1.26) | 3.53E-01 | 1.00E+00 |
| rs17634958 | 7 DDC | 0.10 Dom | 0.81(0.52-1.26) | 3.53E-01 | 1.00E+00 |
| rs6944090  | 7 DDC | 0.10 Add | 0.77(0.52-1.15) | 2.03E-01 | 1.00E+00 |
| rs3735275  | 7 DDC | 0.45 Dom | 1.17(0.82-1.68) | 3.74E-01 | 1.00E+00 |
| rs11575383 | 7 DDC | 0.02 Add | 0.7(0.3-1.61)   | 3.95E-01 | 1.00E+00 |
| rs11575388 | 7 DDC | 0.02 Add | 0.7(0.3-1.61)   | 3.95E-01 | 1.00E+00 |
| rs17133878 | 7 DDC | 0.45 Rec | 1.27(0.87-1.86) | 2.15E-01 | 1.00E+00 |
| rs2242041  | 7 DDC | 0.09 Add | 0.84(0.56-1.26) | 3.89E-01 | 1.00E+00 |
| rs11575305 | 7 DDC | 0.01 Add | 1.5(0.62-3.66)  | 3.71E-01 | 1.00E+00 |
| rs11575553 | 7 DDC | 0.09 Add | 0.84(0.56-1.27) | 4.05E-01 | 1.00E+00 |
| rs2329368  | 7 DDC | 0.05 Add | 0.79(0.47-1.34) | 3.89E-01 | 1.00E+00 |
| rs11575453 | 7 DDC | 0.05 Add | 0.79(0.47-1.34) | 3.89E-01 | 1.00E+00 |
| rs6593011  | 7 DDC | 0.01 Add | 0.66(0.22-1.94) | 4.48E-01 | 1.00E+00 |
| rs6962356  | 7 DDC | 0.46 Rec | 1.26(0.86-1.83) | 2.37E-01 | 1.00E+00 |
| rs6969081  | 7 DDC | 0.46 Rec | 1.26(0.86-1.83) | 2.37E-01 | 1.00E+00 |
| rs17133842 | 7 DDC | 0.02 Add | 0.72(0.31-1.67) | 4.40E-01 | 1.00E+00 |
| rs10265930 | 7 DDC | 0.42 Dom | 1.02(0.73-1.42) | 9.24E-01 | 1.00E+00 |
| rs1470747  | 7 DDC | 0.42 Dom | 1.02(0.73-1.42) | 9.24E-01 | 1.00E+00 |
| rs17152014 | 7 DDC | 0.02 Add | 0.72(0.31-1.67) | 4.40E-01 | 1.00E+00 |
| rs4947644  | 7 DDC | 0.45 Rec | 1.26(0.86-1.84) | 2.31E-01 | 1.00E+00 |
| rs2060762  | 7 DDC | 0.45 Dom | 1.16(0.81-1.64) | 4.24E-01 | 1.00E+00 |
| rs4947535  | 7 DDC | 0.49 Rec | 0.8(0.54-1.17)  | 2.42E-01 | 1.00E+00 |
| rs10499695 | 7 DDC | 0.46 Rec | 1.25(0.85-1.82) | 2.53E-01 | 1.00E+00 |
| rs10228056 | 7 DDC | 0.10 Add | 1.15(0.8-1.67)  | 4.50E-01 | 1.00E+00 |
| rs11575450 | 7 DDC | 0.02 Add | 0.74(0.32-1.72) | 4.79E-01 | 1.00E+00 |
| rs17133877 | 7 DDC | 0.10 Dom | 1.16(0.78-1.72) | 4.77E-01 | 1.00E+00 |
| rs11974297 | 7 DDC | 0.46 Rec | 1.23(0.84-1.8)  | 2.78E-01 | 1.00E+00 |
| rs17635123 | 7 DDC | 0.10 Add | 0.88(0.59-1.31) | 5.33E-01 | 1.00E+00 |
| rs2329364  | 7 DDC | 0.09 Dom | 1.14(0.76-1.71) | 5.27E-01 | 1.00E+00 |
| rs11575338 | 7 DDC | 0.10 Add | 0.9(0.61-1.33)  | 5.85E-01 | 1.00E+00 |
| rs1376523  | 7 DDC | 0.11 Rec | 0.57(0.07-4.66) | 5.98E-01 | 1.00E+00 |
| rs896307   | 7 DDC | 0.47 Dom | 1.11(0.78-1.59) | 5.66E-01 | 1.00E+00 |
| rs3807558  | 7 DDC | 0.47 Dom | 1.11(0.78-1.59) | 5.69E-01 | 1.00E+00 |



|            |       |          |                 |          |          |
|------------|-------|----------|-----------------|----------|----------|
| rs2876829  | 7 DDC | 0.47 Dom | 1.11(0.78-1.59) | 5.69E-01 | 1.00E+00 |
| rs11575575 | 7 DDC | 0.03 Add | 0.83(0.42-1.61) | 5.77E-01 | 1.00E+00 |
| rs1817074  | 7 DDC | 0.18 Dom | 0.98(0.7-1.39)  | 9.19E-01 | 1.00E+00 |
| rs896309   | 7 DDC | 0.44 Rec | 1.11(0.75-1.65) | 6.00E-01 | 1.00E+00 |
| rs11575516 | 7 DDC | 0.07 Add | 0.88(0.55-1.41) | 5.94E-01 | 1.00E+00 |
| rs4329234  | 7 DDC | 0.35 Add | 0.93(0.73-1.18) | 5.28E-01 | 1.00E+00 |
| rs11575313 | 7 DDC | 0.10 Add | 0.92(0.62-1.35) | 6.55E-01 | 1.00E+00 |
| rs11575322 | 7 DDC | 0.10 Add | 0.92(0.62-1.35) | 6.55E-01 | 1.00E+00 |
| rs11575321 | 7 DDC | 0.10 Add | 0.92(0.62-1.35) | 6.55E-01 | 1.00E+00 |
| rs1451374  | 7 DDC | 0.48 Dom | 0.89(0.62-1.26) | 5.00E-01 | 1.00E+00 |
| rs1451373  | 7 DDC | 0.48 Dom | 0.89(0.62-1.26) | 5.00E-01 | 1.00E+00 |
| rs921450   | 7 DDC | 0.48 Dom | 0.89(0.62-1.26) | 5.00E-01 | 1.00E+00 |
| rs6592952  | 7 DDC | 0.35 Add | 0.93(0.73-1.18) | 5.35E-01 | 1.00E+00 |
| rs6263     | 7 DDC | 0.06 Add | 0.88(0.53-1.45) | 6.11E-01 | 1.00E+00 |
| rs7790758  | 7 DDC | 0.47 Rec | 1.09(0.75-1.59) | 6.47E-01 | 1.00E+00 |
| rs7777600  | 7 DDC | 0.10 Dom | 0.83(0.54-1.28) | 4.07E-01 | 1.00E+00 |
| rs17733244 | 7 DDC | 0.47 Dom | 1.08(0.75-1.54) | 6.77E-01 | 1.00E+00 |
| rs7790230  | 7 DDC | 0.45 Dom | 0.87(0.62-1.23) | 4.28E-01 | 1.00E+00 |
| rs4947510  | 7 DDC | 0.45 Dom | 0.87(0.62-1.23) | 4.28E-01 | 1.00E+00 |
| rs12718572 | 7 DDC | 0.23 Rec | 1(0.5-2)        | 9.92E-01 | 1.00E+00 |
| rs3807552  | 7 DDC | 0.40 Rec | 0.85(0.54-1.32) | 4.69E-01 | 1.00E+00 |
| rs921451   | 7 DDC | 0.48 Rec | 1.11(0.77-1.61) | 5.80E-01 | 1.00E+00 |
| rs6949897  | 7 DDC | 0.48 Rec | 1.11(0.77-1.61) | 5.80E-01 | 1.00E+00 |
| rs1451375  | 7 DDC | 0.48 Rec | 1.11(0.77-1.61) | 5.80E-01 | 1.00E+00 |
| rs4452748  | 7 DDC | 0.48 Rec | 1.11(0.77-1.61) | 5.80E-01 | 1.00E+00 |
| rs2329342  | 7 DDC | 0.48 Rec | 1.11(0.77-1.61) | 5.80E-01 | 1.00E+00 |
| rs2329340  | 7 DDC | 0.48 Rec | 1.11(0.77-1.61) | 5.80E-01 | 1.00E+00 |
| rs10250513 | 7 DDC | 0.48 Rec | 1.11(0.77-1.61) | 5.80E-01 | 1.00E+00 |
| rs1966839  | 7 DDC | 0.48 Rec | 1.14(0.79-1.65) | 4.74E-01 | 1.00E+00 |
| rs11238133 | 7 DDC | 0.50 Rec | 0.88(0.61-1.27) | 4.94E-01 | 1.00E+00 |
| rs1349491  | 7 DDC | 0.10 Add | 0.93(0.63-1.38) | 7.34E-01 | 1.00E+00 |
| rs2876830  | 7 DDC | 0.10 Add | 0.93(0.63-1.38) | 7.34E-01 | 1.00E+00 |
| rs3807553  | 7 DDC | 0.10 Add | 0.93(0.63-1.38) | 7.34E-01 | 1.00E+00 |
| rs11575286 | 7 DDC | 0.10 Add | 0.93(0.63-1.38) | 7.34E-01 | 1.00E+00 |
| rs3823674  | 7 DDC | 0.34 Dom | 0.95(0.68-1.3)  | 7.31E-01 | 1.00E+00 |
| rs12718574 | 7 DDC | 0.34 Dom | 0.95(0.68-1.3)  | 7.31E-01 | 1.00E+00 |
| rs11761683 | 7 DDC | 0.50 Add | 0.94(0.75-1.17) | 5.70E-01 | 1.00E+00 |

|            |       |          |                 |          |          |
|------------|-------|----------|-----------------|----------|----------|
| rs10899736 | 7 DDC | 0.41 Dom | 1.05(0.75-1.47) | 7.58E-01 | 1.00E+00 |
| rs1451371  | 7 DDC | 0.41 Dom | 1.05(0.75-1.47) | 7.58E-01 | 1.00E+00 |
| rs12535064 | 7 DDC | 0.20 Add | 1(0.75-1.32)    | 9.88E-01 | 1.00E+00 |
| rs12538830 | 7 DDC | 0.20 Add | 1(0.75-1.32)    | 9.88E-01 | 1.00E+00 |
| rs11575489 | 7 DDC | 0.07 Add | 0.92(0.57-1.48) | 7.35E-01 | 1.00E+00 |
| rs7803247  | 7 DDC | 0.42 Dom | 0.95(0.68-1.33) | 7.74E-01 | 1.00E+00 |
| rs10499694 | 7 DDC | 0.39 Dom | 0.9(0.65-1.25)  | 5.21E-01 | 1.00E+00 |
| rs3807566  | 7 DDC | 0.34 Add | 0.94(0.74-1.2)  | 6.43E-01 | 1.00E+00 |
| rs1451368  | 7 DDC | 0.19 Rec | 1.03(0.46-2.3)  | 9.40E-01 | 1.00E+00 |
| rs10244632 | 7 DDC | 0.20 Rec | 1.07(0.5-2.29)  | 8.71E-01 | 1.00E+00 |
| rs10249982 | 7 DDC | 0.20 Rec | 1.07(0.5-2.29)  | 8.71E-01 | 1.00E+00 |
| rs1982406  | 7 DDC | 0.20 Rec | 1.07(0.5-2.29)  | 8.71E-01 | 1.00E+00 |
| rs3735274  | 7 DDC | 0.20 Rec | 1.07(0.5-2.29)  | 8.71E-01 | 1.00E+00 |
| rs9918702  | 7 DDC | 0.20 Rec | 1.07(0.5-2.29)  | 8.71E-01 | 1.00E+00 |
| rs7456339  | 7 DDC | 0.20 Rec | 1.1(0.51-2.36)  | 8.15E-01 | 1.00E+00 |
| rs4585697  | 7 DDC | 0.19 Rec | 1.1(0.51-2.36)  | 8.15E-01 | 1.00E+00 |
| rs1470750  | 7 DDC | 0.23 Dom | 1.03(0.74-1.44) | 8.44E-01 | 1.00E+00 |
| rs2100280  | 7 DDC | 0.19 Rec | 1.03(0.47-2.29) | 9.36E-01 | 1.00E+00 |
| rs10271341 | 7 DDC | 0.42 Rec | 1.02(0.68-1.53) | 9.21E-01 | 1.00E+00 |
| rs3735273  | 7 DDC | 0.42 Rec | 1.02(0.68-1.53) | 9.21E-01 | 1.00E+00 |
| rs6950777  | 7 DDC | 0.42 Rec | 1.02(0.68-1.53) | 9.21E-01 | 1.00E+00 |
| rs9942686  | 7 DDC | 0.42 Rec | 1.02(0.68-1.53) | 9.21E-01 | 1.00E+00 |
| rs11238138 | 7 DDC | 0.41 Rec | 1.08(0.72-1.64) | 7.01E-01 | 1.00E+00 |
| rs12718527 | 7 DDC | 0.41 Rec | 1.08(0.72-1.64) | 7.01E-01 | 1.00E+00 |
| rs12718528 | 7 DDC | 0.41 Rec | 1.08(0.72-1.64) | 7.01E-01 | 1.00E+00 |
| rs12718529 | 7 DDC | 0.41 Rec | 1.08(0.72-1.64) | 7.01E-01 | 1.00E+00 |
| rs1349492  | 7 DDC | 0.41 Rec | 1.08(0.72-1.64) | 7.01E-01 | 1.00E+00 |
| rs2329365  | 7 DDC | 0.41 Rec | 1.08(0.72-1.64) | 7.01E-01 | 1.00E+00 |
| rs2876827  | 7 DDC | 0.41 Rec | 1.08(0.72-1.64) | 7.01E-01 | 1.00E+00 |
| rs3887825  | 7 DDC | 0.41 Rec | 1.08(0.72-1.64) | 7.01E-01 | 1.00E+00 |
| rs4433100  | 7 DDC | 0.41 Rec | 1.08(0.72-1.64) | 7.01E-01 | 1.00E+00 |
| rs4579483  | 7 DDC | 0.41 Rec | 1.08(0.72-1.64) | 7.01E-01 | 1.00E+00 |
| rs4580999  | 7 DDC | 0.41 Rec | 1.08(0.72-1.64) | 7.01E-01 | 1.00E+00 |
| rs4992502  | 7 DDC | 0.41 Rec | 1.08(0.72-1.64) | 7.01E-01 | 1.00E+00 |
| rs11575320 | 7 DDC | 0.42 Dom | 1.06(0.75-1.48) | 7.49E-01 | 1.00E+00 |
| rs3779078  | 7 DDC | 0.42 Dom | 1.06(0.75-1.48) | 7.49E-01 | 1.00E+00 |
| rs3807555  | 7 DDC | 0.42 Dom | 1.06(0.75-1.48) | 7.49E-01 | 1.00E+00 |

|            |        |          |                 |          |          |
|------------|--------|----------|-----------------|----------|----------|
| rs3807556  | 7 DDC  | 0.42 Dom | 1.06(0.75-1.48) | 7.49E-01 | 1.00E+00 |
| rs4947582  | 7 DDC  | 0.41 Dom | 1.04(0.74-1.45) | 8.34E-01 | 1.00E+00 |
| rs7785224  | 7 DDC  | 0.49 Dom | 0.96(0.67-1.39) | 8.40E-01 | 1.00E+00 |
| rs11765748 | 7 DDC  | 0.38 Dom | 0.92(0.66-1.28) | 6.14E-01 | 1.00E+00 |
| rs6592961  | 7 DDC  | 0.19 Rec | 1.01(0.45-2.27) | 9.73E-01 | 1.00E+00 |
| rs7786398  | 7 DDC  | 0.48 Rec | 1.08(0.74-1.56) | 6.99E-01 | 1.00E+00 |
| rs732215   | 7 DDC  | 0.44 Add | 1.02(0.81-1.27) | 8.88E-01 | 1.00E+00 |
| rs2198144  | 7 DDC  | 0.19 Dom | 0.93(0.66-1.31) | 6.85E-01 | 1.00E+00 |
| rs4947584  | 7 DDC  | 0.19 Dom | 0.93(0.66-1.31) | 6.85E-01 | 1.00E+00 |
| rs7809758  | 7 DDC  | 0.19 Dom | 0.93(0.66-1.31) | 6.85E-01 | 1.00E+00 |
| rs6592963  | 7 DDC  | 0.19 Dom | 0.95(0.68-1.33) | 7.58E-01 | 1.00E+00 |
| rs11575334 | 7 DDC  | 0.39 Dom | 0.92(0.66-1.28) | 6.30E-01 | 1.00E+00 |
| rs998850   | 7 DDC  | 0.39 Dom | 0.92(0.66-1.28) | 6.30E-01 | 1.00E+00 |
| rs7808025  | 7 DDC  | 0.19 Rec | 1.17(0.54-2.54) | 6.94E-01 | 1.00E+00 |
| rs10249420 | 7 DDC  | 0.43 Dom | 1.04(0.74-1.45) | 8.36E-01 | 1.00E+00 |
| rs10899734 | 7 DDC  | 0.41 Dom | 1.02(0.73-1.43) | 8.87E-01 | 1.00E+00 |
| rs10899735 | 7 DDC  | 0.41 Dom | 1.02(0.73-1.43) | 8.87E-01 | 1.00E+00 |
| rs11575457 | 7 DDC  | 0.41 Dom | 1.02(0.73-1.43) | 8.87E-01 | 1.00E+00 |
| rs11980368 | 7 DDC  | 0.41 Dom | 1.02(0.73-1.43) | 8.87E-01 | 1.00E+00 |
| rs12718541 | 7 DDC  | 0.41 Dom | 1.02(0.73-1.43) | 8.87E-01 | 1.00E+00 |
| rs13311361 | 7 DDC  | 0.41 Dom | 1.02(0.73-1.43) | 8.87E-01 | 1.00E+00 |
| rs1451372  | 7 DDC  | 0.41 Dom | 1.02(0.73-1.43) | 8.87E-01 | 1.00E+00 |
| rs2122822  | 7 DDC  | 0.41 Dom | 1.02(0.73-1.43) | 8.87E-01 | 1.00E+00 |
| rs4947577  | 7 DDC  | 0.41 Dom | 1.02(0.73-1.43) | 8.87E-01 | 1.00E+00 |
| rs4948196  | 7 DDC  | 0.41 Dom | 1.02(0.73-1.43) | 8.87E-01 | 1.00E+00 |
| rs11768267 | 7 DDC  | 0.41 Dom | 0.98(0.7-1.36)  | 8.85E-01 | 1.00E+00 |
| rs730092   | 7 DDC  | 0.41 Dom | 0.98(0.7-1.36)  | 8.85E-01 | 1.00E+00 |
| rs10276473 | 7 DDC  | 0.42 Dom | 1.08(0.77-1.51) | 6.63E-01 | 1.00E+00 |
| rs2329371  | 7 DDC  | 0.42 Dom | 1.08(0.77-1.51) | 6.63E-01 | 1.00E+00 |
| rs2044859  | 7 DDC  | 0.42 Add | 1.02(0.81-1.27) | 8.84E-01 | 1.00E+00 |
| rs3779074  | 7 DDC  | 0.42 Add | 1.02(0.81-1.27) | 8.84E-01 | 1.00E+00 |
| rs265975   | 5 DRD1 | 0.37 Rec | 0.64(0.38-1.07) | 8.90E-02 | 9.68E-01 |
| rs7724863  | 5 DRD1 | 0.27 Add | 1(0.77-1.3)     | 9.87E-01 | 9.87E-01 |
| rs17065021 | 5 DRD1 | 0.24 Dom | 0.99(0.72-1.37) | 9.58E-01 | 9.97E-01 |
| rs10463051 | 5 DRD1 | 0.24 Dom | 0.99(0.72-1.37) | 9.58E-01 | 9.97E-01 |
| rs265973   | 5 DRD1 | 0.44 Add | 0.99(0.79-1.25) | 9.54E-01 | 1.00E+00 |
| rs267418   | 5 DRD1 | 0.45 Dom | 1.07(0.75-1.51) | 7.13E-01 | 1.00E+00 |

|            |        |          |                 |          |          |
|------------|--------|----------|-----------------|----------|----------|
| rs4867798  | 5 DRD1 | 0.45 Rec | 0.77(0.52-1.16) | 2.09E-01 | 1.00E+00 |
| rs265981   | 5 DRD1 | 0.13 Rec | 0.73(0.16-3.38) | 6.90E-01 | 1.00E+00 |
| rs11749676 | 5 DRD1 | 0.13 Rec | 0.73(0.16-3.38) | 6.90E-01 | 1.00E+00 |
| rs4532     | 5 DRD1 | 0.13 Rec | 0.73(0.16-3.38) | 6.90E-01 | 1.00E+00 |
| rs686      | 5 DRD1 | 0.13 Rec | 0.73(0.16-3.38) | 6.90E-01 | 1.00E+00 |
| rs863126   | 5 DRD1 | 0.42 Dom | 1.15(0.81-1.62) | 4.37E-01 | 1.00E+00 |
| rs10042051 | 5 DRD1 | 0.20 Add | 0.98(0.74-1.3)  | 8.92E-01 | 1.00E+00 |
| rs1799914  | 5 DRD1 | 0.09 Dom | 1.19(0.79-1.78) | 4.14E-01 | 1.00E+00 |
| rs10042826 | 5 DRD1 | 0.20 Rec | 1.06(0.46-2.44) | 8.91E-01 | 1.00E+00 |
| rs28465440 | 5 DRD1 | 0.16 Rec | 0.6(0.22-1.64)  | 3.21E-01 | 1.00E+00 |
| rs6881740  | 5 DRD1 | 0.36 Add | 1.1(0.87-1.39)  | 4.20E-01 | 1.00E+00 |
| rs2644635  | 5 DRD1 | 0.45 Rec | 1.23(0.83-1.81) | 3.04E-01 | 1.00E+00 |
| rs11954565 | 5 DRD1 | 0.45 Rec | 1.23(0.83-1.81) | 3.04E-01 | 1.00E+00 |
| rs11746641 | 5 DRD1 | 0.19 Add | 0.88(0.66-1.16) | 3.62E-01 | 1.00E+00 |
| rs2457090  | 5 DRD1 | 0.14 Dom | 0.92(0.63-1.35) | 6.83E-01 | 1.00E+00 |
| rs11746172 | 5 DRD1 | 0.20 Rec | 0.79(0.37-1.72) | 5.58E-01 | 1.00E+00 |
| rs703748   | 5 DRD1 | 0.41 Dom | 1.18(0.84-1.65) | 3.33E-01 | 1.00E+00 |
| rs835616   | 5 DRD1 | 0.18 Dom | 0.95(0.68-1.34) | 7.91E-01 | 1.00E+00 |
| rs2471005  | 5 DRD1 | 0.14 Dom | 0.95(0.65-1.38) | 7.80E-01 | 1.00E+00 |
| rs5326     | 5 DRD1 | 0.23 Dom | 1.05(0.76-1.45) | 7.59E-01 | 1.00E+00 |
| rs265969   | 5 DRD1 | 0.17 Add | 1.05(0.77-1.43) | 7.55E-01 | 1.00E+00 |
| rs11747728 | 5 DRD1 | 0.21 Dom | 0.86(0.61-1.2)  | 3.71E-01 | 1.00E+00 |
| rs11747886 | 5 DRD1 | 0.19 Add | 0.89(0.67-1.18) | 4.16E-01 | 1.00E+00 |
| rs265974   | 5 DRD1 | 0.48 Rec | 0.88(0.59-1.29) | 5.03E-01 | 1.00E+00 |
| rs12518222 | 5 DRD1 | 0.23 Rec | 1.13(0.56-2.28) | 7.29E-01 | 1.00E+00 |
| rs4867797  | 5 DRD1 | 0.19 Add | 0.89(0.67-1.18) | 4.11E-01 | 1.00E+00 |
| rs1310277  | 5 DRD1 | 0.11 Dom | 0.83(0.55-1.24) | 3.59E-01 | 1.00E+00 |
| rs265977   | 5 DRD1 | 0.21 Rec | 0.67(0.28-1.59) | 3.67E-01 | 1.00E+00 |
| rs11739696 | 5 DRD1 | 0.36 Add | 1.07(0.84-1.35) | 5.81E-01 | 1.00E+00 |
| rs265976   | 5 DRD1 | 0.17 Rec | 0.64(0.23-1.76) | 3.89E-01 | 1.00E+00 |
| rs267400   | 5 DRD1 | 0.44 Add | 1.09(0.87-1.35) | 4.69E-01 | 1.00E+00 |
| rs11742274 | 5 DRD1 | 0.20 Add | 0.89(0.68-1.18) | 4.34E-01 | 1.00E+00 |
| rs265971   | 5 DRD1 | 0.17 Dom | 1.07(0.76-1.51) | 7.06E-01 | 1.00E+00 |
| rs265972   | 5 DRD1 | 0.37 Dom | 0.92(0.67-1.27) | 6.24E-01 | 1.00E+00 |
| rs267407   | 5 DRD1 | 0.44 Rec | 1.07(0.73-1.58) | 7.28E-01 | 1.00E+00 |
| rs267405   | 5 DRD1 | 0.44 Rec | 1.07(0.73-1.58) | 7.28E-01 | 1.00E+00 |
| rs267406   | 5 DRD1 | 0.44 Rec | 1.07(0.73-1.58) | 7.28E-01 | 1.00E+00 |

|            |           |          |                 |          |          |
|------------|-----------|----------|-----------------|----------|----------|
| rs2168631  | 5 DRD1    | 0.39 Rec | 0.83(0.53-1.29) | 4.11E-01 | 1.00E+00 |
| rs267416   | 5 DRD1    | 0.46 Dom | 1.1(0.77-1.56)  | 5.98E-01 | 1.00E+00 |
| rs11749035 | 5 DRD1    | 0.19 Dom | 0.87(0.62-1.22) | 4.14E-01 | 1.00E+00 |
| rs265978   | 5 DRD1    | 0.13 Dom | 0.95(0.65-1.38) | 7.73E-01 | 1.00E+00 |
| rs10063286 | 5 DRD1    | 0.20 Rec | 1.09(0.47-2.52) | 8.41E-01 | 1.00E+00 |
| rs6882300  | 5 DRD1    | 0.20 Rec | 1.09(0.47-2.52) | 8.41E-01 | 1.00E+00 |
| rs6878159  | 5 DRD1    | 0.20 Rec | 1.09(0.47-2.52) | 8.41E-01 | 1.00E+00 |
| rs835540   | 5 DRD1    | 0.49 Add | 0.92(0.74-1.15) | 4.91E-01 | 1.00E+00 |
| rs10476156 | 5 DRD1    | 0.20 Rec | 0.87(0.42-1.83) | 7.16E-01 | 1.00E+00 |
| rs10039221 | 5 DRD1    | 0.20 Rec | 0.87(0.42-1.83) | 7.16E-01 | 1.00E+00 |
| rs267417   | 5 DRD1    | 0.13 Dom | 0.94(0.64-1.37) | 7.37E-01 | 1.00E+00 |
| rs11738801 | 5 DRD1    | 0.19 Dom | 0.87(0.62-1.22) | 4.21E-01 | 1.00E+00 |
| rs251937   | 5 DRD1    | 0.44 Add | 1.05(0.84-1.31) | 6.60E-01 | 1.00E+00 |
| rs1587176  | 5 DRD1    | 0.12 Rec | 0.67(0.08-5.86) | 7.17E-01 | 1.00E+00 |
| rs265967   | 5 DRD1    | 0.36 Add | 1.07(0.85-1.36) | 5.49E-01 | 1.00E+00 |
| rs2453737  | 5 DRD1    | 0.38 Add | 1.07(0.85-1.35) | 5.56E-01 | 1.00E+00 |
| rs265968   | 5 DRD1    | 0.34 Rec | 1.2(0.75-1.93)  | 4.50E-01 | 1.00E+00 |
| rs4867796  | 5 DRD1    | 0.19 Dom | 0.88(0.63-1.23) | 4.61E-01 | 1.00E+00 |
| rs2298122  | 10 DRD1IP | 0.06 Add | 2.21(1.49-3.27) | 8.39E-05 | 4.10E-04 |
| rs11101694 | 10 DRD1IP | 0.06 Add | 2.35(1.54-3.58) | 8.98E-05 | 4.79E-04 |
| rs4838721  | 10 DRD1IP | 0.06 Add | 2.33(1.54-3.54) | 9.01E-05 | 4.79E-04 |
| rs2105341  | 10 DRD1IP | 0.06 Add | 2.31(1.52-3.52) | 9.35E-05 | 5.91E-04 |
| rs2275723  | 10 DRD1IP | 0.03 Add | 2.82(1.58-5.01) | 4.19E-04 | 1.87E-03 |
| rs12250582 | 10 DRD1IP | 0.05 Add | 2.12(1.38-3.26) | 6.58E-04 | 2.18E-03 |
| rs12244716 | 10 DRD1IP | 0.05 Add | 2.12(1.38-3.26) | 6.58E-04 | 2.18E-03 |
| rs7085530  | 10 DRD1IP | 0.05 Add | 2.12(1.38-3.26) | 6.58E-04 | 2.18E-03 |
| rs10776672 | 10 DRD1IP | 0.03 Dom | 1.92(1.03-3.56) | 3.98E-02 | 5.19E-02 |
| rs2864417  | 10 DRD1IP | 0.03 Dom | 1.92(1.03-3.56) | 3.98E-02 | 5.19E-02 |
| rs9880168  | 3 DRD3    | 0.12 Add | 1.43(1.02-2.01) | 4.05E-02 | 7.29E-01 |
| rs2399496  | 3 DRD3    | 0.46 Rec | 0.67(0.44-1.02) | 6.27E-02 | 8.33E-01 |
| rs3773678  | 3 DRD3    | 0.16 Dom | 1.37(0.97-1.94) | 7.34E-02 | 8.68E-01 |
| rs324036   | 3 DRD3    | 0.16 Dom | 1.37(0.97-1.94) | 7.34E-02 | 8.69E-01 |
| rs9817063  | 3 DRD3    | 0.45 Rec | 0.67(0.44-1.04) | 7.23E-02 | 8.70E-01 |
| rs6787134  | 3 DRD3    | 0.05 Dom | 1.5(0.91-2.5)   | 1.15E-01 | 8.73E-01 |
| rs3732790  | 3 DRD3    | 0.36 Rec | 0.64(0.38-1.08) | 9.57E-02 | 8.74E-01 |
| rs324032   | 3 DRD3    | 0.10 Add | 1.33(0.93-1.91) | 1.16E-01 | 8.79E-01 |
| rs2630350  | 3 DRD3    | 0.10 Add | 1.33(0.93-1.91) | 1.16E-01 | 8.79E-01 |

|            |        |          |                 |          |          |
|------------|--------|----------|-----------------|----------|----------|
| rs2630351  | 3 DRD3 | 0.10 Add | 1.33(0.93-1.91) | 1.16E-01 | 8.79E-01 |
| rs1354348  | 3 DRD3 | 0.02 Dom | 0.48(0.16-1.45) | 1.94E-01 | 8.82E-01 |
| rs2134655  | 3 DRD3 | 0.26 Rec | 0.5(0.22-1.14)  | 9.77E-02 | 8.85E-01 |
| rs9825563  | 3 DRD3 | 0.29 Rec | 1.6(0.9-2.87)   | 1.11E-01 | 9.26E-01 |
| rs167771   | 3 DRD3 | 0.17 Dom | 1.32(0.94-1.86) | 1.10E-01 | 9.35E-01 |
| rs1486009  | 3 DRD3 | 0.01 Add | 0.44(0.1-1.98)  | 2.81E-01 | 9.39E-01 |
| rs2630349  | 3 DRD3 | 0.11 Add | 1.32(0.94-1.85) | 1.12E-01 | 9.40E-01 |
| rs12639080 | 3 DRD3 | 0.30 Add | 1.17(0.91-1.51) | 2.14E-01 | 9.41E-01 |
| rs7629232  | 3 DRD3 | 0.30 Rec | 1.55(0.87-2.77) | 1.39E-01 | 9.46E-01 |
| rs9880494  | 3 DRD3 | 0.30 Add | 1.18(0.91-1.53) | 2.06E-01 | 9.50E-01 |
| rs324035   | 3 DRD3 | 0.17 Dom | 1.29(0.92-1.82) | 1.41E-01 | 9.53E-01 |
| rs1587756  | 3 DRD3 | 0.24 Rec | 1.61(0.84-3.09) | 1.52E-01 | 9.58E-01 |
| rs6280     | 3 DRD3 | 0.31 Add | 1.16(0.9-1.49)  | 2.53E-01 | 9.64E-01 |
| rs1800828  | 3 DRD3 | 0.29 Add | 1.16(0.9-1.49)  | 2.53E-01 | 9.64E-01 |
| rs7638961  | 3 DRD3 | 0.31 Rec | 1.47(0.85-2.56) | 1.70E-01 | 9.67E-01 |
| rs324026   | 3 DRD3 | 0.31 Rec | 1.47(0.85-2.56) | 1.70E-01 | 9.67E-01 |
| rs3773679  | 3 DRD3 | 0.37 Rec | 0.73(0.45-1.2)  | 2.14E-01 | 9.79E-01 |
| rs7633291  | 3 DRD3 | 0.27 Add | 1.14(0.88-1.47) | 3.16E-01 | 9.83E-01 |
| rs9859762  | 3 DRD3 | 0.01 Add | 0.99(0.39-2.51) | 9.87E-01 | 9.87E-01 |
| rs10934256 | 3 DRD3 | 0.27 Add | 1.13(0.87-1.45) | 3.55E-01 | 9.88E-01 |
| rs1587757  | 3 DRD3 | 0.23 Rec | 1.52(0.78-2.97) | 2.22E-01 | 9.88E-01 |
| rs2087017  | 3 DRD3 | 0.49 Rec | 0.88(0.6-1.28)  | 5.03E-01 | 9.90E-01 |
| rs963468   | 3 DRD3 | 0.39 Rec | 0.83(0.53-1.32) | 4.35E-01 | 9.90E-01 |
| rs1486008  | 3 DRD3 | 0.02 Add | 0.88(0.37-2.06) | 7.62E-01 | 9.91E-01 |
| rs3732783  | 3 DRD3 | 0.02 Add | 0.88(0.37-2.06) | 7.62E-01 | 9.91E-01 |
| rs1486012  | 3 DRD3 | 0.49 Rec | 0.91(0.62-1.32) | 6.12E-01 | 9.94E-01 |
| rs7625282  | 3 DRD3 | 0.28 Add | 1.11(0.86-1.43) | 4.06E-01 | 9.95E-01 |
| rs1385884  | 3 DRD3 | 0.48 Rec | 0.85(0.58-1.25) | 4.22E-01 | 9.95E-01 |
| rs11721264 | 3 DRD3 | 0.28 Add | 1.11(0.86-1.44) | 4.11E-01 | 9.95E-01 |
| rs226082   | 3 DRD3 | 0.28 Add | 1.11(0.86-1.43) | 4.10E-01 | 9.95E-01 |
| rs324029   | 3 DRD3 | 0.28 Add | 1.11(0.86-1.43) | 4.10E-01 | 9.95E-01 |
| rs324030   | 3 DRD3 | 0.28 Add | 1.11(0.86-1.43) | 4.10E-01 | 9.95E-01 |
| rs167770   | 3 DRD3 | 0.28 Add | 1.1(0.86-1.42)  | 4.51E-01 | 9.98E-01 |
| rs7638876  | 3 DRD3 | 0.32 Rec | 1.13(0.66-1.95) | 6.49E-01 | 9.98E-01 |
| rs9682405  | 3 DRD3 | 0.03 Add | 1.18(0.61-2.3)  | 6.19E-01 | 9.98E-01 |
| rs9869286  | 3 DRD3 | 0.03 Add | 1.18(0.61-2.3)  | 6.19E-01 | 9.98E-01 |
| rs10934253 | 3 DRD3 | 0.03 Add | 1.18(0.61-2.3)  | 6.19E-01 | 9.98E-01 |

|            |         |          |                 |          |          |
|------------|---------|----------|-----------------|----------|----------|
| rs6808291  | 3 DRD3  | 0.03 Add | 1.19(0.61-2.32) | 6.04E-01 | 9.99E-01 |
| rs324022   | 3 DRD3  | 0.29 Rec | 1.3(0.73-2.3)   | 3.73E-01 | 9.99E-01 |
| rs16822393 | 3 DRD3  | 0.01 Add | 0.99(0.36-2.72) | 9.86E-01 | 1.00E+00 |
| rs9824856  | 3 DRD3  | 0.01 Add | 1.01(0.4-2.57)  | 9.81E-01 | 1.00E+00 |
| rs11246228 | 11 DRD4 | 0.46 Dom | 0.68(0.48-0.95) | 2.43E-02 | 4.23E-01 |
| rs11246226 | 11 DRD4 | 0.28 Dom | 0.71(0.52-0.99) | 4.11E-02 | 5.57E-01 |
| rs4331145  | 11 DRD4 | 0.28 Dom | 0.72(0.52-0.99) | 4.47E-02 | 5.83E-01 |
| rs936465   | 11 DRD4 | 0.27 Dom | 0.73(0.53-1.01) | 5.72E-02 | 6.62E-01 |
| rs7932167  | 11 DRD4 | 0.31 Rec | 0.8(0.45-1.42)  | 4.46E-01 | 6.83E-01 |
| rs936461   | 11 DRD4 | 0.26 Rec | 1.85(0.96-3.58) | 6.66E-02 | 7.35E-01 |
| rs6598007  | 11 DRD4 | 0.29 Rec | 1.28(0.76-2.15) | 3.48E-01 | 8.25E-01 |
| rs12280580 | 11 DRD4 | 0.03 Add | 0.64(0.3-1.37)  | 2.50E-01 | 8.74E-01 |
| rs4987059  | 11 DRD4 | 0.01 Add | 1.34(0.54-3.32) | 5.28E-01 | 9.00E-01 |
| rs11604855 | 11 DRD4 | 0.19 Dom | 0.84(0.59-1.18) | 3.07E-01 | 9.12E-01 |
| rs10902188 | 11 DRD4 | 0.18 Rec | 1.61(0.72-3.62) | 2.47E-01 | 9.14E-01 |
| rs3758653  | 11 DRD4 | 0.28 Add | 0.89(0.69-1.16) | 4.06E-01 | 9.21E-01 |
| rs2740373  | 11 DRD4 | 0.03 Add | 0.67(0.31-1.43) | 3.00E-01 | 9.24E-01 |
| rs4963126  | 11 DRD4 | 0.49 Rec | 0.83(0.57-1.22) | 3.49E-01 | 9.25E-01 |
| rs6282     | 4 DRD5  | 0.01 Add | 1.95(0.87-4.37) | 1.07E-01 | 6.43E-01 |
| rs2867383  | 4 DRD5  | 0.48 Dom | 1.02(0.71-1.47) | 9.22E-01 | 9.22E-01 |
| rs2280206  | 4 DRD5  | 0.20 Rec | 1.69(0.83-3.47) | 1.50E-01 | 9.28E-01 |
| rs7685396  | 4 DRD5  | 0.20 Rec | 1.69(0.83-3.47) | 1.50E-01 | 9.28E-01 |
| rs2280207  | 4 DRD5  | 0.20 Rec | 1.69(0.83-3.47) | 1.50E-01 | 9.28E-01 |
| rs13106539 | 4 DRD5  | 0.20 Rec | 1.69(0.83-3.47) | 1.50E-01 | 9.28E-01 |
| rs938556   | 4 DRD5  | 0.20 Rec | 1.55(0.75-3.22) | 2.38E-01 | 9.69E-01 |
| rs2280208  | 4 DRD5  | 0.20 Rec | 1.55(0.75-3.22) | 2.38E-01 | 9.69E-01 |
| rs1850739  | 4 DRD5  | 0.20 Rec | 1.55(0.75-3.22) | 2.38E-01 | 9.69E-01 |
| rs10939507 | 4 DRD5  | 0.20 Rec | 1.55(0.73-3.29) | 2.55E-01 | 9.70E-01 |
| rs10939514 | 4 DRD5  | 0.20 Rec | 1.55(0.73-3.29) | 2.55E-01 | 9.70E-01 |
| rs10939504 | 4 DRD5  | 0.20 Rec | 1.55(0.73-3.29) | 2.55E-01 | 9.70E-01 |
| rs1850744  | 4 DRD5  | 0.20 Rec | 1.53(0.74-3.18) | 2.52E-01 | 9.73E-01 |
| rs6449000  | 4 DRD5  | 0.20 Rec | 1.57(0.75-3.26) | 2.28E-01 | 9.75E-01 |
| rs10939515 | 4 DRD5  | 0.30 Dom | 0.83(0.6-1.14)  | 2.46E-01 | 9.77E-01 |
| rs10033951 | 4 DRD5  | 0.44 Dom | 1.12(0.79-1.59) | 5.37E-01 | 9.87E-01 |
| rs1519097  | 4 DRD5  | 0.38 Dom | 1.12(0.8-1.57)  | 4.99E-01 | 9.91E-01 |
| rs10001006 | 4 DRD5  | 0.28 Rec | 1.12(0.63-2.01) | 6.96E-01 | 9.91E-01 |
| rs11731100 | 4 DRD5  | 0.34 Rec | 0.89(0.55-1.45) | 6.36E-01 | 9.92E-01 |

|            |         |          |                 |          |          |
|------------|---------|----------|-----------------|----------|----------|
| rs10003216 | 4 DRD5  | 0.34 Rec | 0.89(0.55-1.45) | 6.36E-01 | 9.92E-01 |
| rs7655090  | 4 DRD5  | 0.46 Add | 1.07(0.85-1.35) | 5.62E-01 | 9.96E-01 |
| rs157206   | 1 EPB41 | 0.15 Rec | 0(0-Inf)        | 9.78E-01 | 2.37E-01 |
| rs12027267 | 1 EPB41 | 0.07 Add | 0.65(0.4-1.06)  | 8.18E-02 | 6.40E-01 |
| rs157224   | 1 EPB41 | 0.11 Rec | 0(0-Inf)        | 9.74E-01 | 7.02E-01 |
| rs157198   | 1 EPB41 | 0.11 Rec | 0(0-Inf)        | 9.74E-01 | 7.03E-01 |
| rs157217   | 1 EPB41 | 0.11 Rec | 0(0-Inf)        | 9.74E-01 | 7.03E-01 |
| rs157216   | 1 EPB41 | 0.11 Rec | 0(0-Inf)        | 9.74E-01 | 7.03E-01 |
| rs6702335  | 1 EPB41 | 0.07 Add | 0.71(0.45-1.13) | 1.54E-01 | 8.40E-01 |
| rs12039988 | 1 EPB41 | 0.07 Add | 0.71(0.45-1.13) | 1.54E-01 | 8.40E-01 |
| rs157220   | 1 EPB41 | 0.08 Add | 1.33(0.9-1.97)  | 1.52E-01 | 8.50E-01 |
| rs457618   | 1 EPB41 | 0.08 Add | 1.34(0.9-1.98)  | 1.53E-01 | 8.51E-01 |
| rs10429865 | 1 EPB41 | 0.07 Add | 0.72(0.45-1.14) | 1.64E-01 | 8.57E-01 |
| rs12021646 | 1 EPB41 | 0.07 Add | 0.72(0.45-1.14) | 1.64E-01 | 8.58E-01 |
| rs12021667 | 1 EPB41 | 0.07 Add | 0.72(0.45-1.14) | 1.64E-01 | 8.58E-01 |
| rs150089   | 1 EPB41 | 0.15 Rec | 0.34(0.08-1.51) | 1.55E-01 | 8.83E-01 |
| rs203278   | 1 EPB41 | 0.15 Rec | 0.34(0.08-1.51) | 1.55E-01 | 8.83E-01 |
| rs2985327  | 1 EPB41 | 0.15 Rec | 0.34(0.08-1.51) | 1.55E-01 | 8.83E-01 |
| rs6656832  | 1 EPB41 | 0.15 Rec | 0.34(0.08-1.51) | 1.55E-01 | 8.83E-01 |
| rs2985322  | 1 EPB41 | 0.15 Rec | 0.35(0.08-1.57) | 1.70E-01 | 9.13E-01 |
| rs204058   | 1 EPB41 | 0.15 Rec | 0.35(0.08-1.57) | 1.70E-01 | 9.14E-01 |
| rs126013   | 1 EPB41 | 0.08 Add | 1.29(0.87-1.94) | 2.09E-01 | 9.21E-01 |
| rs126014   | 1 EPB41 | 0.07 Add | 1.28(0.85-1.92) | 2.30E-01 | 9.42E-01 |
| rs2930842  | 1 EPB41 | 0.08 Add | 1.26(0.84-1.89) | 2.61E-01 | 9.56E-01 |
| rs2985325  | 1 EPB41 | 0.08 Add | 1.25(0.84-1.87) | 2.76E-01 | 9.64E-01 |
| rs2985334  | 1 EPB41 | 0.08 Add | 1.25(0.84-1.87) | 2.78E-01 | 9.65E-01 |
| rs10915207 | 1 EPB41 | 0.19 Add | 1.01(0.75-1.36) | 9.66E-01 | 9.67E-01 |
| rs2993715  | 1 EPB41 | 0.08 Add | 1.23(0.82-1.85) | 3.20E-01 | 9.80E-01 |
| rs2985340  | 1 EPB41 | 0.08 Add | 1.23(0.82-1.85) | 3.20E-01 | 9.80E-01 |
| rs2788889  | 1 EPB41 | 0.08 Add | 1.23(0.82-1.85) | 3.20E-01 | 9.80E-01 |
| rs2985331  | 1 EPB41 | 0.08 Add | 1.23(0.82-1.85) | 3.26E-01 | 9.82E-01 |
| rs203277   | 1 EPB41 | 0.08 Add | 1.22(0.81-1.83) | 3.50E-01 | 9.87E-01 |
| rs2985344  | 1 EPB41 | 0.08 Add | 1.22(0.81-1.83) | 3.50E-01 | 9.87E-01 |
| rs2762682  | 1 EPB41 | 0.08 Add | 1.22(0.81-1.83) | 3.50E-01 | 9.87E-01 |
| rs3102739  | 1 EPB41 | 0.08 Add | 1.21(0.8-1.82)  | 3.61E-01 | 9.89E-01 |
| rs150085   | 1 EPB41 | 0.08 Add | 1.21(0.8-1.82)  | 3.61E-01 | 9.89E-01 |
| rs204060   | 1 EPB41 | 0.08 Add | 1.21(0.8-1.82)  | 3.61E-01 | 9.89E-01 |



|            |         |          |                 |          |          |
|------------|---------|----------|-----------------|----------|----------|
| rs2930836  | 1 EPB41 | 0.08 Add | 1.21(0.8-1.82)  | 3.61E-01 | 9.89E-01 |
| rs502393   | 1 EPB41 | 0.44 Rec | 0.91(0.61-1.37) | 6.55E-01 | 9.91E-01 |
| rs2249138  | 1 EPB41 | 0.44 Rec | 0.91(0.61-1.37) | 6.55E-01 | 9.91E-01 |
| rs2452788  | 1 EPB41 | 0.40 Rec | 0.76(0.48-1.21) | 2.52E-01 | 9.92E-01 |
| rs553253   | 1 EPB41 | 0.44 Rec | 0.94(0.62-1.4)  | 7.51E-01 | 9.96E-01 |
| rs4578183  | 1 EPB41 | 0.15 Rec | 0.53(0.15-1.87) | 3.24E-01 | 9.96E-01 |
| rs204057   | 1 EPB41 | 0.15 Rec | 0.53(0.15-1.87) | 3.24E-01 | 9.96E-01 |
| rs1185779  | 1 EPB41 | 0.08 Add | 1.17(0.78-1.76) | 4.52E-01 | 9.97E-01 |
| rs2985328  | 1 EPB41 | 0.15 Rec | 0.55(0.16-1.95) | 3.56E-01 | 9.98E-01 |
| rs4654388  | 1 EPB41 | 0.06 Dom | 0.96(0.59-1.56) | 8.65E-01 | 9.98E-01 |
| rs12038347 | 1 EPB41 | 0.41 Dom | 1.16(0.82-1.62) | 4.03E-01 | 9.99E-01 |
| rs4654381  | 1 EPB41 | 0.25 Dom | 0.87(0.63-1.2)  | 3.87E-01 | 9.99E-01 |
| rs11581096 | 1 EPB41 | 0.25 Dom | 0.87(0.63-1.2)  | 3.87E-01 | 9.99E-01 |
| rs16837840 | 1 EPB41 | 0.41 Dom | 1.15(0.82-1.62) | 4.06E-01 | 9.99E-01 |
| rs12047323 | 1 EPB41 | 0.41 Dom | 1.15(0.82-1.62) | 4.07E-01 | 9.99E-01 |
| rs4275422  | 1 EPB41 | 0.41 Dom | 1.15(0.82-1.62) | 4.07E-01 | 9.99E-01 |
| rs957633   | 1 EPB41 | 0.41 Dom | 1.15(0.82-1.62) | 4.07E-01 | 9.99E-01 |
| rs157208   | 1 EPB41 | 0.15 Rec | 0.57(0.16-2.04) | 3.88E-01 | 9.99E-01 |
| rs12045777 | 1 EPB41 | 0.49 Dom | 1.15(0.79-1.67) | 4.73E-01 | 1.00E+00 |
| rs2788888  | 1 EPB41 | 0.44 Rec | 0.88(0.58-1.32) | 5.33E-01 | 1.00E+00 |
| rs6686151  | 1 EPB41 | 0.44 Rec | 0.88(0.58-1.33) | 5.48E-01 | 1.00E+00 |
| rs2985329  | 1 EPB41 | 0.44 Rec | 0.88(0.58-1.33) | 5.48E-01 | 1.00E+00 |
| rs4360499  | 1 EPB41 | 0.44 Rec | 0.88(0.58-1.33) | 5.48E-01 | 1.00E+00 |
| rs2486198  | 1 EPB41 | 0.44 Rec | 0.88(0.58-1.33) | 5.48E-01 | 1.00E+00 |
| rs2985319  | 1 EPB41 | 0.19 Dom | 0.95(0.68-1.33) | 7.67E-01 | 1.00E+00 |
| rs157213   | 1 EPB41 | 0.44 Rec | 0.88(0.58-1.33) | 5.49E-01 | 1.00E+00 |
| rs150083   | 1 EPB41 | 0.44 Rec | 0.88(0.58-1.33) | 5.49E-01 | 1.00E+00 |
| rs3003628  | 1 EPB41 | 0.44 Rec | 0.88(0.58-1.33) | 5.47E-01 | 1.00E+00 |
| rs2153165  | 1 EPB41 | 0.44 Rec | 0.88(0.58-1.33) | 5.47E-01 | 1.00E+00 |
| rs3003631  | 1 EPB41 | 0.44 Rec | 0.88(0.58-1.33) | 5.47E-01 | 1.00E+00 |
| rs2985337  | 1 EPB41 | 0.44 Rec | 0.88(0.58-1.33) | 5.47E-01 | 1.00E+00 |
| rs2788890  | 1 EPB41 | 0.44 Rec | 0.88(0.58-1.33) | 5.47E-01 | 1.00E+00 |
| rs2993713  | 1 EPB41 | 0.44 Rec | 0.88(0.58-1.33) | 5.47E-01 | 1.00E+00 |
| rs2985338  | 1 EPB41 | 0.44 Rec | 0.88(0.58-1.33) | 5.47E-01 | 1.00E+00 |
| rs12045750 | 1 EPB41 | 0.42 Dom | 1.14(0.81-1.61) | 4.47E-01 | 1.00E+00 |
| rs2503015  | 1 EPB41 | 0.44 Rec | 0.89(0.59-1.34) | 5.65E-01 | 1.00E+00 |
| rs2254241  | 1 EPB41 | 0.44 Rec | 0.89(0.59-1.34) | 5.65E-01 | 1.00E+00 |

|            |            |          |                 |          |          |
|------------|------------|----------|-----------------|----------|----------|
| rs2985335  | 1 EPB41    | 0.44 Rec | 0.89(0.59-1.34) | 5.65E-01 | 1.00E+00 |
| rs7544914  | 1 EPB41    | 0.44 Rec | 0.89(0.59-1.34) | 5.65E-01 | 1.00E+00 |
| rs6703599  | 1 EPB41    | 0.44 Rec | 0.89(0.59-1.34) | 5.65E-01 | 1.00E+00 |
| rs9426306  | 1 EPB41    | 0.44 Rec | 0.89(0.59-1.34) | 5.65E-01 | 1.00E+00 |
| rs3003627  | 1 EPB41    | 0.44 Rec | 0.89(0.59-1.34) | 5.65E-01 | 1.00E+00 |
| rs2985330  | 1 EPB41    | 0.44 Rec | 0.89(0.59-1.34) | 5.65E-01 | 1.00E+00 |
| rs2985332  | 1 EPB41    | 0.44 Rec | 0.89(0.59-1.34) | 5.65E-01 | 1.00E+00 |
| rs12070152 | 1 EPB41    | 0.44 Rec | 0.89(0.59-1.34) | 5.65E-01 | 1.00E+00 |
| rs12072831 | 1 EPB41    | 0.44 Rec | 0.89(0.59-1.34) | 5.65E-01 | 1.00E+00 |
| rs12045054 | 1 EPB41    | 0.41 Dom | 1.13(0.81-1.59) | 4.64E-01 | 1.00E+00 |
| rs10915208 | 1 EPB41    | 0.41 Dom | 1.13(0.81-1.59) | 4.64E-01 | 1.00E+00 |
| rs157194   | 1 EPB41    | 0.44 Dom | 0.96(0.68-1.35) | 8.20E-01 | 1.00E+00 |
| rs4654390  | 1 EPB41    | 0.48 Rec | 0.88(0.6-1.3)   | 5.27E-01 | 1.00E+00 |
| rs10915216 | 1 EPB41    | 0.48 Rec | 0.88(0.6-1.3)   | 5.25E-01 | 1.00E+00 |
| rs2762686  | 1 EPB41    | 0.44 Add | 0.94(0.75-1.18) | 6.14E-01 | 1.00E+00 |
| rs550712   | 1 EPB41    | 0.44 Add | 0.94(0.75-1.18) | 6.19E-01 | 1.00E+00 |
| rs2486200  | 1 EPB41    | 0.44 Rec | 0.87(0.58-1.32) | 5.24E-01 | 1.00E+00 |
| rs3813918  | 20 EPB41L1 | 0.27 Dom | 1.43(1.04-1.98) | 2.90E-02 | 4.96E-01 |
| rs709050   | 20 EPB41L1 | 0.26 Dom | 1.42(1.03-1.97) | 3.12E-02 | 5.20E-01 |
| rs6121179  | 20 EPB41L1 | 0.27 Dom | 1.42(1.03-1.95) | 3.41E-02 | 5.48E-01 |
| rs1046383  | 20 EPB41L1 | 0.27 Dom | 1.41(1.03-1.95) | 3.48E-02 | 5.52E-01 |
| rs11700361 | 20 EPB41L1 | 0.27 Dom | 1.41(1.03-1.95) | 3.48E-02 | 5.53E-01 |
| rs6058435  | 20 EPB41L1 | 0.27 Dom | 1.41(1.02-1.95) | 3.55E-02 | 5.57E-01 |
| rs11700298 | 20 EPB41L1 | 0.27 Dom | 1.41(1.02-1.95) | 3.55E-02 | 5.57E-01 |
| rs2295568  | 20 EPB41L1 | 0.16 Dom | 1.4(1-1.97)     | 5.33E-02 | 6.99E-01 |
| rs6141601  | 20 EPB41L1 | 0.05 Add | 1.05(0.65-1.69) | 8.53E-01 | 8.53E-01 |
| rs2425191  | 20 EPB41L1 | 0.31 Dom | 1.32(0.95-1.82) | 9.37E-02 | 8.56E-01 |
| rs2425185  | 20 EPB41L1 | 0.04 Add | 0.68(0.36-1.27) | 2.28E-01 | 8.91E-01 |
| rs6060845  | 20 EPB41L1 | 0.19 Dom | 1.31(0.94-1.82) | 1.09E-01 | 8.93E-01 |
| rs2859715  | 20 EPB41L1 | 0.06 Add | 0.75(0.45-1.25) | 2.66E-01 | 9.26E-01 |
| rs2425188  | 20 EPB41L1 | 0.04 Add | 0.71(0.38-1.34) | 2.89E-01 | 9.39E-01 |
| rs6119695  | 20 EPB41L1 | 0.14 Rec | 0.37(0.08-1.72) | 2.07E-01 | 9.48E-01 |
| rs6121156  | 20 EPB41L1 | 0.15 Dom | 1.23(0.86-1.74) | 2.53E-01 | 9.48E-01 |
| rs6142512  | 20 EPB41L1 | 0.10 Dom | 0.96(0.63-1.45) | 8.39E-01 | 9.64E-01 |
| rs6142509  | 20 EPB41L1 | 0.05 Dom | 0.76(0.41-1.39) | 3.67E-01 | 9.69E-01 |
| rs17093377 | 20 EPB41L1 | 0.15 Add | 1.13(0.83-1.55) | 4.31E-01 | 9.77E-01 |
| rs4142032  | 20 EPB41L1 | 0.14 Dom | 1.18(0.82-1.68) | 3.73E-01 | 9.78E-01 |

|            |            |          |                 |          |          |
|------------|------------|----------|-----------------|----------|----------|
| rs6058427  | 20 EPB41L1 | 0.14 Rec | 0.41(0.09-1.94) | 2.64E-01 | 9.78E-01 |
| rs6060842  | 20 EPB41L1 | 0.14 Rec | 0.41(0.09-1.94) | 2.64E-01 | 9.78E-01 |
| rs6060820  | 20 EPB41L1 | 0.14 Rec | 0.41(0.09-1.94) | 2.64E-01 | 9.78E-01 |
| rs2281579  | 20 EPB41L1 | 0.14 Rec | 0.41(0.09-1.94) | 2.64E-01 | 9.78E-01 |
| rs6060840  | 20 EPB41L1 | 0.14 Rec | 0.41(0.09-1.94) | 2.64E-01 | 9.78E-01 |
| rs1998147  | 20 EPB41L1 | 0.14 Rec | 0.41(0.09-1.94) | 2.64E-01 | 9.78E-01 |
| rs2590947  | 20 EPB41L1 | 0.14 Rec | 0.41(0.09-1.94) | 2.64E-01 | 9.78E-01 |
| rs6058429  | 20 EPB41L1 | 0.14 Rec | 0.41(0.09-1.94) | 2.64E-01 | 9.78E-01 |
| rs6121163  | 20 EPB41L1 | 0.14 Rec | 0.41(0.09-1.94) | 2.64E-01 | 9.78E-01 |
| rs2179666  | 20 EPB41L1 | 0.14 Rec | 0.41(0.09-1.94) | 2.64E-01 | 9.78E-01 |
| rs2590949  | 20 EPB41L1 | 0.24 Rec | 0.67(0.32-1.39) | 2.80E-01 | 9.81E-01 |
| rs752697   | 20 EPB41L1 | 0.24 Rec | 0.67(0.32-1.39) | 2.80E-01 | 9.81E-01 |
| rs2752898  | 20 EPB41L1 | 0.24 Rec | 0.67(0.31-1.43) | 3.00E-01 | 9.85E-01 |
| rs6060831  | 20 EPB41L1 | 0.02 Add | 0.89(0.35-2.26) | 8.01E-01 | 9.89E-01 |
| rs2590991  | 20 EPB41L1 | 0.24 Dom | 1.11(0.81-1.54) | 5.11E-01 | 9.92E-01 |
| rs2247688  | 20 EPB41L1 | 0.26 Dom | 1.16(0.84-1.6)  | 3.62E-01 | 9.93E-01 |
| rs3850528  | 20 EPB41L1 | 0.10 Dom | 0.95(0.62-1.44) | 7.95E-01 | 9.93E-01 |
| rs6142508  | 20 EPB41L1 | 0.10 Dom | 0.93(0.61-1.4)  | 7.18E-01 | 9.95E-01 |
| rs6141600  | 20 EPB41L1 | 0.25 Dom | 1.1(0.79-1.51)  | 5.80E-01 | 9.97E-01 |
| rs2746103  | 20 EPB41L1 | 0.24 Dom | 1.09(0.79-1.5)  | 5.97E-01 | 9.98E-01 |
| rs9789814  | 20 EPB41L1 | 0.06 Add | 1.08(0.68-1.71) | 7.55E-01 | 9.99E-01 |
| rs1855078  | 6 EPB41L2  | 0.07 Add | 0.59(0.35-0.98) | 4.08E-02 | 5.90E-01 |
| rs1332492  | 6 EPB41L2  | 0.07 Add | 0.59(0.36-0.99) | 4.44E-02 | 6.20E-01 |
| rs17059938 | 6 EPB41L2  | 0.28 Rec | 1.85(1.11-3.09) | 1.85E-02 | 6.72E-01 |
| rs17059968 | 6 EPB41L2  | 0.28 Rec | 1.85(1.11-3.09) | 1.85E-02 | 6.72E-01 |
| rs10499181 | 6 EPB41L2  | 0.28 Rec | 1.85(1.11-3.09) | 1.85E-02 | 6.73E-01 |
| rs10499178 | 6 EPB41L2  | 0.27 Rec | 1.84(1.1-3.06)  | 1.99E-02 | 6.88E-01 |
| rs3822865  | 6 EPB41L2  | 0.27 Rec | 1.84(1.1-3.06)  | 1.99E-02 | 6.89E-01 |
| rs17059853 | 6 EPB41L2  | 0.27 Rec | 1.84(1.1-3.06)  | 1.99E-02 | 6.89E-01 |
| rs17059909 | 6 EPB41L2  | 0.28 Rec | 1.84(1.1-3.06)  | 1.99E-02 | 6.89E-01 |
| rs1999473  | 6 EPB41L2  | 0.28 Rec | 1.84(1.1-3.06)  | 1.99E-02 | 6.92E-01 |
| rs4142581  | 6 EPB41L2  | 0.27 Rec | 1.84(1.1-3.06)  | 1.99E-02 | 6.92E-01 |
| rs17059736 | 6 EPB41L2  | 0.08 Add | 0.64(0.41-1.01) | 5.55E-02 | 7.03E-01 |
| rs3822859  | 6 EPB41L2  | 0.27 Rec | 1.85(1.08-3.14) | 2.40E-02 | 7.44E-01 |
| rs9492776  | 6 EPB41L2  | 0.08 Add | 0.64(0.4-1.03)  | 6.38E-02 | 7.47E-01 |
| rs9492785  | 6 EPB41L2  | 0.08 Add | 0.64(0.4-1.03)  | 6.38E-02 | 7.47E-01 |
| rs12527605 | 6 EPB41L2  | 0.08 Add | 0.64(0.4-1.03)  | 6.38E-02 | 7.47E-01 |

|            |           |          |                 |          |          |
|------------|-----------|----------|-----------------|----------|----------|
| rs11969461 | 6 EPB41L2 | 0.08 Add | 0.64(0.4-1.03)  | 6.38E-02 | 7.48E-01 |
| rs6923182  | 6 EPB41L2 | 0.08 Add | 0.64(0.4-1.03)  | 6.38E-02 | 7.48E-01 |
| rs6941909  | 6 EPB41L2 | 0.08 Add | 0.64(0.4-1.03)  | 6.38E-02 | 7.48E-01 |
| rs9492784  | 6 EPB41L2 | 0.08 Add | 0.64(0.4-1.03)  | 6.38E-02 | 7.48E-01 |
| rs2327006  | 6 EPB41L2 | 0.08 Add | 0.64(0.4-1.03)  | 6.38E-02 | 7.48E-01 |
| rs7747059  | 6 EPB41L2 | 0.08 Add | 0.64(0.4-1.03)  | 6.38E-02 | 7.49E-01 |
| rs12529894 | 6 EPB41L2 | 0.08 Add | 0.64(0.4-1.03)  | 6.38E-02 | 7.49E-01 |
| rs9492782  | 6 EPB41L2 | 0.08 Add | 0.65(0.41-1.03) | 6.75E-02 | 7.68E-01 |
| rs6928986  | 6 EPB41L2 | 0.39 Rec | 1.59(1.05-2.41) | 2.88E-02 | 7.75E-01 |
| rs17059851 | 6 EPB41L2 | 0.27 Rec | 1.82(1.07-3.09) | 2.74E-02 | 7.76E-01 |
| rs3777451  | 6 EPB41L2 | 0.27 Rec | 1.81(1.07-3.08) | 2.77E-02 | 7.80E-01 |
| rs3822860  | 6 EPB41L2 | 0.27 Rec | 1.81(1.07-3.08) | 2.77E-02 | 7.82E-01 |
| rs17059760 | 6 EPB41L2 | 0.27 Rec | 1.81(1.07-3.08) | 2.80E-02 | 7.83E-01 |
| rs2275064  | 6 EPB41L2 | 0.27 Rec | 1.81(1.07-3.08) | 2.80E-02 | 7.83E-01 |
| rs17059787 | 6 EPB41L2 | 0.27 Rec | 1.81(1.07-3.08) | 2.80E-02 | 7.84E-01 |
| rs17059801 | 6 EPB41L2 | 0.27 Rec | 1.81(1.07-3.08) | 2.80E-02 | 7.84E-01 |
| rs3777447  | 6 EPB41L2 | 0.27 Rec | 1.81(1.07-3.08) | 2.80E-02 | 7.85E-01 |
| rs17059799 | 6 EPB41L2 | 0.27 Rec | 1.81(1.07-3.08) | 2.80E-02 | 7.85E-01 |
| rs3777448  | 6 EPB41L2 | 0.27 Rec | 1.81(1.07-3.08) | 2.80E-02 | 7.85E-01 |
| rs3777456  | 6 EPB41L2 | 0.27 Rec | 1.8(1.06-3.06)  | 2.93E-02 | 7.94E-01 |
| rs17059808 | 6 EPB41L2 | 0.27 Rec | 1.8(1.06-3.06)  | 2.97E-02 | 7.94E-01 |
| rs17059963 | 6 EPB41L2 | 0.26 Rec | 1.8(1.06-3.05)  | 2.96E-02 | 7.96E-01 |
| rs17059810 | 6 EPB41L2 | 0.27 Rec | 1.8(1.06-3.06)  | 2.97E-02 | 7.97E-01 |
| rs17059678 | 6 EPB41L2 | 0.08 Add | 0.67(0.42-1.05) | 7.93E-02 | 8.13E-01 |
| rs17059739 | 6 EPB41L2 | 0.27 Rec | 1.78(1.05-3.02) | 3.33E-02 | 8.22E-01 |
| rs10499176 | 6 EPB41L2 | 0.27 Rec | 1.78(1.05-3.02) | 3.33E-02 | 8.23E-01 |
| rs10499175 | 6 EPB41L2 | 0.27 Rec | 1.76(1.04-2.99) | 3.57E-02 | 8.38E-01 |
| rs17059735 | 6 EPB41L2 | 0.27 Rec | 1.76(1.04-2.99) | 3.57E-02 | 8.38E-01 |
| rs17059726 | 6 EPB41L2 | 0.27 Rec | 1.76(1.04-2.99) | 3.57E-02 | 8.40E-01 |
| rs2839942  | 6 EPB41L2 | 0.27 Rec | 1.75(1.03-2.98) | 3.69E-02 | 8.47E-01 |
| rs9492774  | 6 EPB41L2 | 0.32 Rec | 1.67(1.02-2.71) | 4.00E-02 | 8.63E-01 |
| rs10499177 | 6 EPB41L2 | 0.08 Add | 0.68(0.44-1.07) | 9.72E-02 | 8.69E-01 |
| rs12528626 | 6 EPB41L2 | 0.08 Add | 0.69(0.44-1.08) | 1.02E-01 | 8.80E-01 |
| rs3777433  | 6 EPB41L2 | 0.27 Rec | 1.7(0.99-2.9)   | 5.30E-02 | 9.16E-01 |
| rs6921207  | 6 EPB41L2 | 0.44 Rec | 1.45(0.98-2.15) | 6.00E-02 | 9.27E-01 |
| rs933064   | 6 EPB41L2 | 0.38 Rec | 1.5(0.98-2.3)   | 6.50E-02 | 9.41E-01 |
| rs9372988  | 6 EPB41L2 | 0.12 Dom | 1.39(0.96-2.01) | 7.87E-02 | 9.61E-01 |

|            |           |          |                 |          |          |
|------------|-----------|----------|-----------------|----------|----------|
| rs7765757  | 6 EPB41L2 | 0.12 Dom | 1.39(0.96-2.01) | 7.87E-02 | 9.61E-01 |
| rs954211   | 6 EPB41L2 | 0.09 Dom | 0.72(0.47-1.13) | 1.53E-01 | 9.63E-01 |
| rs915171   | 6 EPB41L2 | 0.13 Dom | 0.73(0.5-1.06)  | 9.61E-02 | 9.72E-01 |
| rs7765007  | 6 EPB41L2 | 0.12 Dom | 1.38(0.95-1.99) | 8.83E-02 | 9.72E-01 |
| rs17059925 | 6 EPB41L2 | 0.12 Dom | 1.38(0.95-1.99) | 8.83E-02 | 9.73E-01 |
| rs1413755  | 6 EPB41L2 | 0.07 Add | 0.73(0.46-1.16) | 1.79E-01 | 9.80E-01 |
| rs1413753  | 6 EPB41L2 | 0.28 Rec | 1.58(0.92-2.71) | 1.00E-01 | 9.85E-01 |
| rs12661081 | 6 EPB41L2 | 0.12 Dom | 1.35(0.94-1.95) | 1.07E-01 | 9.86E-01 |
| rs6569720  | 6 EPB41L2 | 0.12 Dom | 1.35(0.94-1.96) | 1.07E-01 | 9.87E-01 |
| rs6931804  | 6 EPB41L2 | 0.09 Dom | 0.74(0.47-1.17) | 1.99E-01 | 9.90E-01 |
| rs714709   | 6 EPB41L2 | 0.27 Rec | 1.57(0.9-2.73)  | 1.11E-01 | 9.90E-01 |
| rs1811949  | 6 EPB41L2 | 0.09 Dom | 0.77(0.49-1.2)  | 2.45E-01 | 9.91E-01 |
| rs7752292  | 6 EPB41L2 | 0.50 Rec | 1.33(0.93-1.91) | 1.21E-01 | 9.91E-01 |
| rs6569716  | 6 EPB41L2 | 0.12 Dom | 1.34(0.93-1.93) | 1.22E-01 | 9.91E-01 |
| rs17059669 | 6 EPB41L2 | 0.27 Rec | 1.56(0.9-2.71)  | 1.15E-01 | 9.91E-01 |
| rs4897484  | 6 EPB41L2 | 0.04 Add | 1(0.56-1.78)    | 9.95E-01 | 9.95E-01 |
| rs928592   | 6 EPB41L2 | 0.13 Dom | 0.76(0.52-1.1)  | 1.50E-01 | 9.96E-01 |
| rs12202038 | 6 EPB41L2 | 0.37 Rec | 1.39(0.88-2.2)  | 1.61E-01 | 9.98E-01 |
| rs2236075  | 6 EPB41L2 | 0.37 Rec | 1.39(0.88-2.2)  | 1.61E-01 | 9.98E-01 |
| rs4895903  | 6 EPB41L2 | 0.04 Add | 0.99(0.56-1.76) | 9.84E-01 | 9.98E-01 |
| rs7769678  | 6 EPB41L2 | 0.04 Add | 1.02(0.58-1.79) | 9.47E-01 | 9.98E-01 |
| rs9385568  | 6 EPB41L2 | 0.04 Add | 1.02(0.58-1.79) | 9.47E-01 | 9.98E-01 |
| rs17784418 | 6 EPB41L2 | 0.04 Add | 1.03(0.58-1.81) | 9.27E-01 | 9.98E-01 |
| rs17831009 | 6 EPB41L2 | 0.16 Dom | 1.26(0.9-1.78)  | 1.81E-01 | 9.99E-01 |
| rs6918160  | 6 EPB41L2 | 0.06 Add | 0.77(0.46-1.3)  | 3.29E-01 | 9.99E-01 |
| rs9492762  | 6 EPB41L2 | 0.10 Dom | 0.76(0.5-1.14)  | 1.87E-01 | 9.99E-01 |
| rs4897473  | 6 EPB41L2 | 0.07 Add | 0.79(0.5-1.25)  | 3.08E-01 | 9.99E-01 |
| rs6975     | 6 EPB41L2 | 0.49 Rec | 1.28(0.89-1.85) | 1.89E-01 | 9.99E-01 |
| rs2095961  | 6 EPB41L2 | 0.11 Dom | 0.76(0.5-1.16)  | 2.02E-01 | 9.99E-01 |
| rs4895902  | 6 EPB41L2 | 0.13 Dom | 1.28(0.89-1.83) | 1.88E-01 | 9.99E-01 |
| rs6922177  | 6 EPB41L2 | 0.11 Dom | 0.76(0.5-1.16)  | 2.02E-01 | 9.99E-01 |
| rs9372985  | 6 EPB41L2 | 0.11 Dom | 0.76(0.5-1.16)  | 2.02E-01 | 9.99E-01 |
| rs7741148  | 6 EPB41L2 | 0.04 Add | 0.99(0.56-1.74) | 9.72E-01 | 9.99E-01 |
| rs4895901  | 6 EPB41L2 | 0.04 Add | 0.99(0.56-1.74) | 9.72E-01 | 9.99E-01 |
| rs6935108  | 6 EPB41L2 | 0.04 Add | 1.02(0.57-1.81) | 9.46E-01 | 9.99E-01 |
| rs13437326 | 6 EPB41L2 | 0.10 Dom | 0.76(0.5-1.17)  | 2.12E-01 | 9.99E-01 |
| rs17059681 | 6 EPB41L2 | 0.11 Add | 1.24(0.87-1.77) | 2.31E-01 | 1.00E+00 |

|            |           |          |                 |          |          |
|------------|-----------|----------|-----------------|----------|----------|
| rs4897485  | 6 EPB41L2 | 0.04 Add | 0.77(0.41-1.44) | 4.08E-01 | 1.00E+00 |
| rs6921396  | 6 EPB41L2 | 0.03 Add | 0.75(0.38-1.49) | 4.17E-01 | 1.00E+00 |
| rs6922045  | 6 EPB41L2 | 0.10 Dom | 0.82(0.53-1.26) | 3.57E-01 | 1.00E+00 |
| rs6926250  | 6 EPB41L2 | 0.10 Dom | 0.82(0.53-1.26) | 3.57E-01 | 1.00E+00 |
| rs2297853  | 6 EPB41L2 | 0.07 Dom | 0.82(0.51-1.33) | 4.22E-01 | 1.00E+00 |
| rs12965    | 6 EPB41L2 | 0.13 Dom | 1.25(0.87-1.79) | 2.31E-01 | 1.00E+00 |
| rs3734186  | 6 EPB41L2 | 0.39 Rec | 0.98(0.62-1.53) | 9.25E-01 | 1.00E+00 |
| rs2281490  | 6 EPB41L2 | 0.34 Rec | 1.33(0.83-2.13) | 2.30E-01 | 1.00E+00 |
| rs4895908  | 6 EPB41L2 | 0.03 Add | 0.77(0.39-1.52) | 4.46E-01 | 1.00E+00 |
| rs1338905  | 6 EPB41L2 | 0.11 Dom | 1.25(0.86-1.83) | 2.44E-01 | 1.00E+00 |
| rs2151069  | 6 EPB41L2 | 0.11 Dom | 1.25(0.86-1.83) | 2.44E-01 | 1.00E+00 |
| rs1332491  | 6 EPB41L2 | 0.11 Dom | 1.25(0.86-1.83) | 2.44E-01 | 1.00E+00 |
| rs2275063  | 6 EPB41L2 | 0.14 Dom | 1.23(0.86-1.76) | 2.50E-01 | 1.00E+00 |
| rs6928920  | 6 EPB41L2 | 0.10 Dom | 0.83(0.54-1.27) | 3.91E-01 | 1.00E+00 |
| rs17785507 | 6 EPB41L2 | 0.04 Add | 0.79(0.42-1.48) | 4.55E-01 | 1.00E+00 |
| rs9375791  | 6 EPB41L2 | 0.22 Rec | 1.04(0.52-2.11) | 9.04E-01 | 1.00E+00 |
| rs872576   | 6 EPB41L2 | 0.07 Add | 0.83(0.53-1.3)  | 4.12E-01 | 1.00E+00 |
| rs17059698 | 6 EPB41L2 | 0.11 Add | 1.22(0.85-1.74) | 2.79E-01 | 1.00E+00 |
| rs17059702 | 6 EPB41L2 | 0.11 Add | 1.22(0.85-1.74) | 2.79E-01 | 1.00E+00 |
| rs12664355 | 6 EPB41L2 | 0.11 Add | 1.22(0.85-1.74) | 2.79E-01 | 1.00E+00 |
| rs12199765 | 6 EPB41L2 | 0.47 Rec | 1.23(0.84-1.8)  | 2.87E-01 | 1.00E+00 |
| rs9375787  | 6 EPB41L2 | 0.48 Dom | 0.92(0.65-1.32) | 6.59E-01 | 1.00E+00 |
| rs9375788  | 6 EPB41L2 | 0.48 Dom | 0.92(0.65-1.32) | 6.59E-01 | 1.00E+00 |
| rs3777450  | 6 EPB41L2 | 0.11 Dom | 1.23(0.84-1.79) | 2.87E-01 | 1.00E+00 |
| rs17770255 | 6 EPB41L2 | 0.03 Add | 0.8(0.41-1.55)  | 5.12E-01 | 1.00E+00 |
| rs13193246 | 6 EPB41L2 | 0.11 Dom | 1.23(0.84-1.8)  | 2.87E-01 | 1.00E+00 |
| rs3777463  | 6 EPB41L2 | 0.11 Dom | 1.22(0.84-1.78) | 2.95E-01 | 1.00E+00 |
| rs3822864  | 6 EPB41L2 | 0.11 Dom | 1.22(0.84-1.78) | 2.95E-01 | 1.00E+00 |
| rs6900810  | 6 EPB41L2 | 0.11 Dom | 1.22(0.84-1.79) | 2.97E-01 | 1.00E+00 |
| rs2007339  | 6 EPB41L2 | 0.11 Dom | 1.22(0.84-1.79) | 2.97E-01 | 1.00E+00 |
| rs6569718  | 6 EPB41L2 | 0.11 Dom | 1.22(0.84-1.79) | 2.97E-01 | 1.00E+00 |
| rs9375785  | 6 EPB41L2 | 0.43 Rec | 1.08(0.72-1.61) | 7.08E-01 | 1.00E+00 |
| rs2236078  | 6 EPB41L2 | 0.11 Add | 1.2(0.84-1.72)  | 3.18E-01 | 1.00E+00 |
| rs1043598  | 6 EPB41L2 | 0.11 Add | 1.2(0.84-1.71)  | 3.28E-01 | 1.00E+00 |
| rs10499174 | 6 EPB41L2 | 0.11 Add | 1.2(0.84-1.71)  | 3.28E-01 | 1.00E+00 |
| rs17059683 | 6 EPB41L2 | 0.11 Add | 1.2(0.84-1.71)  | 3.28E-01 | 1.00E+00 |
| rs4895907  | 6 EPB41L2 | 0.03 Add | 0.81(0.4-1.6)   | 5.38E-01 | 1.00E+00 |

|            |           |          |                 |          |          |
|------------|-----------|----------|-----------------|----------|----------|
| rs942      | 6 EPB41L2 | 0.09 Dom | 0.85(0.55-1.32) | 4.74E-01 | 1.00E+00 |
| rs17059896 | 6 EPB41L2 | 0.12 Dom | 1.21(0.83-1.76) | 3.34E-01 | 1.00E+00 |
| rs6938552  | 6 EPB41L2 | 0.03 Add | 0.82(0.43-1.59) | 5.63E-01 | 1.00E+00 |
| rs7747881  | 6 EPB41L2 | 0.12 Dom | 1.2(0.83-1.75)  | 3.38E-01 | 1.00E+00 |
| rs933063   | 6 EPB41L2 | 0.49 Dom | 0.92(0.64-1.31) | 6.38E-01 | 1.00E+00 |
| rs1413754  | 6 EPB41L2 | 0.37 Rec | 1.25(0.79-1.99) | 3.34E-01 | 1.00E+00 |
| rs6906478  | 6 EPB41L2 | 0.05 Dom | 0.85(0.49-1.48) | 5.69E-01 | 1.00E+00 |
| rs9375789  | 6 EPB41L2 | 0.43 Rec | 1.11(0.74-1.66) | 6.10E-01 | 1.00E+00 |
| rs9398967  | 6 EPB41L2 | 0.43 Rec | 1.11(0.74-1.66) | 6.10E-01 | 1.00E+00 |
| rs9402306  | 6 EPB41L2 | 0.43 Rec | 1.11(0.74-1.66) | 6.10E-01 | 1.00E+00 |
| rs11760051 | 6 EPB41L2 | 0.43 Rec | 1.11(0.74-1.66) | 6.10E-01 | 1.00E+00 |
| rs10457563 | 6 EPB41L2 | 0.05 Add | 1.05(0.62-1.77) | 8.57E-01 | 1.00E+00 |
| rs9402295  | 6 EPB41L2 | 0.05 Add | 1.05(0.62-1.77) | 8.57E-01 | 1.00E+00 |
| rs10457562 | 6 EPB41L2 | 0.05 Add | 1.05(0.62-1.77) | 8.57E-01 | 1.00E+00 |
| rs2236081  | 6 EPB41L2 | 0.37 Rec | 1.23(0.78-1.92) | 3.68E-01 | 1.00E+00 |
| rs9375794  | 6 EPB41L2 | 0.42 Dom | 0.94(0.67-1.31) | 6.98E-01 | 1.00E+00 |
| rs9402310  | 6 EPB41L2 | 0.42 Dom | 0.94(0.67-1.31) | 6.98E-01 | 1.00E+00 |
| rs9388873  | 6 EPB41L2 | 0.42 Dom | 0.94(0.67-1.31) | 6.98E-01 | 1.00E+00 |
| rs6905151  | 6 EPB41L2 | 0.42 Dom | 0.94(0.67-1.31) | 6.98E-01 | 1.00E+00 |
| rs6916206  | 6 EPB41L2 | 0.42 Dom | 0.94(0.67-1.31) | 6.98E-01 | 1.00E+00 |
| rs12530288 | 6 EPB41L2 | 0.47 Rec | 1.18(0.81-1.72) | 3.86E-01 | 1.00E+00 |
| rs6941712  | 6 EPB41L2 | 0.47 Rec | 1.18(0.81-1.72) | 3.86E-01 | 1.00E+00 |
| rs12526896 | 6 EPB41L2 | 0.47 Rec | 1.18(0.81-1.72) | 3.86E-01 | 1.00E+00 |
| rs3777453  | 6 EPB41L2 | 0.12 Dom | 1.18(0.81-1.72) | 3.87E-01 | 1.00E+00 |
| rs9483206  | 6 EPB41L2 | 0.08 Add | 0.9(0.58-1.39)  | 6.35E-01 | 1.00E+00 |
| rs4357159  | 6 EPB41L2 | 0.47 Add | 1.08(0.86-1.35) | 5.10E-01 | 1.00E+00 |
| rs9321263  | 6 EPB41L2 | 0.05 Dom | 0.87(0.51-1.51) | 6.28E-01 | 1.00E+00 |
| rs17180687 | 6 EPB41L2 | 0.09 Dom | 0.89(0.58-1.38) | 6.04E-01 | 1.00E+00 |
| rs2281487  | 6 EPB41L2 | 0.10 Add | 0.87(0.6-1.26)  | 4.56E-01 | 1.00E+00 |
| rs28482889 | 6 EPB41L2 | 0.05 Add | 0.88(0.51-1.54) | 6.55E-01 | 1.00E+00 |
| rs9492767  | 6 EPB41L2 | 0.20 Dom | 0.87(0.62-1.22) | 4.20E-01 | 1.00E+00 |
| rs7769153  | 6 EPB41L2 | 0.12 Dom | 1.18(0.81-1.72) | 3.97E-01 | 1.00E+00 |
| rs3777438  | 6 EPB41L2 | 0.19 Add | 0.94(0.7-1.25)  | 6.62E-01 | 1.00E+00 |
| rs10457561 | 6 EPB41L2 | 0.05 Add | 1.11(0.67-1.85) | 6.86E-01 | 1.00E+00 |
| rs9375778  | 6 EPB41L2 | 0.05 Add | 1.11(0.67-1.85) | 6.86E-01 | 1.00E+00 |
| rs9385567  | 6 EPB41L2 | 0.05 Add | 1.11(0.67-1.85) | 6.86E-01 | 1.00E+00 |
| rs9388860  | 6 EPB41L2 | 0.05 Add | 1.11(0.67-1.85) | 6.86E-01 | 1.00E+00 |

|            |           |          |                 |          |          |
|------------|-----------|----------|-----------------|----------|----------|
| rs2068147  | 6 EPB41L2 | 0.50 Add | 1.07(0.86-1.35) | 5.34E-01 | 1.00E+00 |
| rs3777461  | 6 EPB41L2 | 0.49 Dom | 1.04(0.72-1.5)  | 8.42E-01 | 1.00E+00 |
| rs9385564  | 6 EPB41L2 | 0.45 Rec | 0.92(0.62-1.38) | 6.94E-01 | 1.00E+00 |
| rs7775013  | 6 EPB41L2 | 0.45 Add | 0.93(0.74-1.17) | 5.51E-01 | 1.00E+00 |
| rs3798249  | 6 EPB41L2 | 0.50 Rec | 1.07(0.75-1.55) | 6.99E-01 | 1.00E+00 |
| rs3777441  | 6 EPB41L2 | 0.50 Rec | 1.07(0.75-1.55) | 6.99E-01 | 1.00E+00 |
| rs3777442  | 6 EPB41L2 | 0.50 Rec | 1.07(0.75-1.55) | 6.99E-01 | 1.00E+00 |
| rs3798250  | 6 EPB41L2 | 0.50 Rec | 1.07(0.75-1.55) | 6.99E-01 | 1.00E+00 |
| rs9375790  | 6 EPB41L2 | 0.42 Dom | 0.93(0.67-1.31) | 6.88E-01 | 1.00E+00 |
| rs3777455  | 6 EPB41L2 | 0.49 Add | 1.05(0.84-1.31) | 6.84E-01 | 1.00E+00 |
| rs9321260  | 6 EPB41L2 | 0.46 Rec | 1.15(0.79-1.68) | 4.58E-01 | 1.00E+00 |
| rs12196734 | 6 EPB41L2 | 0.48 Dom | 0.91(0.64-1.3)  | 6.03E-01 | 1.00E+00 |
| rs12195366 | 6 EPB41L2 | 0.48 Dom | 0.91(0.64-1.3)  | 6.03E-01 | 1.00E+00 |
| rs9388863  | 6 EPB41L2 | 0.45 Dom | 0.94(0.66-1.32) | 7.10E-01 | 1.00E+00 |
| rs4897472  | 6 EPB41L2 | 0.50 Rec | 1.07(0.74-1.55) | 7.10E-01 | 1.00E+00 |
| rs4897471  | 6 EPB41L2 | 0.50 Rec | 1.07(0.74-1.55) | 7.10E-01 | 1.00E+00 |
| rs4897468  | 6 EPB41L2 | 0.48 Add | 0.93(0.75-1.17) | 5.58E-01 | 1.00E+00 |
| rs1043596  | 6 EPB41L2 | 0.27 Dom | 0.94(0.68-1.3)  | 7.10E-01 | 1.00E+00 |
| rs915172   | 6 EPB41L2 | 0.28 Add | 0.96(0.74-1.23) | 7.23E-01 | 1.00E+00 |
| rs3777434  | 6 EPB41L2 | 0.45 Add | 0.94(0.75-1.18) | 5.76E-01 | 1.00E+00 |
| rs2183967  | 6 EPB41L2 | 0.45 Add | 0.94(0.75-1.18) | 5.76E-01 | 1.00E+00 |
| rs12110524 | 6 EPB41L2 | 0.22 Add | 0.95(0.72-1.26) | 7.37E-01 | 1.00E+00 |
| rs3777435  | 6 EPB41L2 | 0.45 Add | 0.94(0.75-1.18) | 5.82E-01 | 1.00E+00 |
| rs3777436  | 6 EPB41L2 | 0.45 Add | 0.94(0.75-1.18) | 5.82E-01 | 1.00E+00 |
| rs3777466  | 6 EPB41L2 | 0.50 Dom | 0.94(0.65-1.35) | 7.34E-01 | 1.00E+00 |
| rs9402292  | 6 EPB41L2 | 0.48 Dom | 0.88(0.62-1.26) | 4.82E-01 | 1.00E+00 |
| rs867707   | 6 EPB41L2 | 0.28 Add | 0.96(0.74-1.23) | 7.35E-01 | 1.00E+00 |
| rs3777432  | 6 EPB41L2 | 0.05 Add | 1.07(0.64-1.8)  | 8.03E-01 | 1.00E+00 |
| rs12197829 | 6 EPB41L2 | 0.48 Add | 0.95(0.76-1.19) | 6.45E-01 | 1.00E+00 |
| rs12193574 | 6 EPB41L2 | 0.50 Dom | 1.06(0.74-1.54) | 7.44E-01 | 1.00E+00 |
| rs9492755  | 6 EPB41L2 | 0.46 Rec | 1.14(0.78-1.66) | 5.00E-01 | 1.00E+00 |
| rs3777458  | 6 EPB41L2 | 0.47 Add | 1.06(0.85-1.33) | 6.00E-01 | 1.00E+00 |
| rs6919007  | 6 EPB41L2 | 0.45 Rec | 0.94(0.63-1.4)  | 7.48E-01 | 1.00E+00 |
| rs12194612 | 6 EPB41L2 | 0.25 Add | 0.97(0.75-1.25) | 8.00E-01 | 1.00E+00 |
| rs12206057 | 6 EPB41L2 | 0.23 Dom | 0.9(0.65-1.24)  | 5.12E-01 | 1.00E+00 |
| rs6938586  | 6 EPB41L2 | 0.23 Dom | 0.9(0.65-1.24)  | 5.12E-01 | 1.00E+00 |
| rs9492775  | 6 EPB41L2 | 0.20 Rec | 1.24(0.59-2.62) | 5.76E-01 | 1.00E+00 |



|            |           |          |                 |          |          |
|------------|-----------|----------|-----------------|----------|----------|
| rs9321265  | 6 EPB41L2 | 0.20 Rec | 1.24(0.59-2.62) | 5.76E-01 | 1.00E+00 |
| rs3777464  | 6 EPB41L2 | 0.35 Dom | 0.9(0.65-1.25)  | 5.28E-01 | 1.00E+00 |
| rs9402291  | 6 EPB41L2 | 0.39 Dom | 0.9(0.65-1.26)  | 5.52E-01 | 1.00E+00 |
| rs6569707  | 6 EPB41L2 | 0.48 Add | 0.95(0.76-1.18) | 6.25E-01 | 1.00E+00 |
| rs3777457  | 6 EPB41L2 | 0.23 Dom | 0.9(0.65-1.25)  | 5.23E-01 | 1.00E+00 |
| rs6569708  | 6 EPB41L2 | 0.48 Rec | 0.95(0.65-1.39) | 7.95E-01 | 1.00E+00 |
| rs9388861  | 6 EPB41L2 | 0.48 Rec | 0.95(0.65-1.39) | 7.95E-01 | 1.00E+00 |
| rs7760965  | 6 EPB41L2 | 0.48 Rec | 0.95(0.65-1.39) | 7.95E-01 | 1.00E+00 |
| rs2070822  | X FLNA    | 0.23 Dom | 0.91(0.65-1.27) | 5.81E-01 | 6.87E-01 |
| rs17428    | X FLNA    | 0.22 Rec | 1.3(0.67-2.52)  | 4.31E-01 | 8.95E-01 |
| rs5945185  | X FLNA    | 0.27 Dom | 0.84(0.61-1.17) | 3.12E-01 | 9.16E-01 |
| rs2070827  | X FLNA    | 0.07 Add | 0.86(0.55-1.36) | 5.30E-01 | 9.20E-01 |
| rs2238687  | 19 FOSB   | 0.42 Rec | 0.68(0.43-1.07) | 9.71E-02 | 7.19E-01 |
| rs2238686  | 19 FOSB   | 0.42 Rec | 0.68(0.43-1.07) | 9.71E-02 | 7.19E-01 |
| rs12373539 | 19 FOSB   | 0.42 Rec | 0.68(0.43-1.07) | 9.71E-02 | 7.19E-01 |
| rs10423854 | 19 FOSB   | 0.29 Add | 0.99(0.77-1.26) | 9.32E-01 | 9.32E-01 |
| rs2276469  | 19 FOSB   | 0.40 Rec | 1.31(0.85-2)    | 2.19E-01 | 9.61E-01 |
| rs2276470  | 19 FOSB   | 0.40 Rec | 1.31(0.85-2)    | 2.19E-01 | 9.61E-01 |
| rs10415949 | 19 FOSB   | 0.41 Dom | 0.91(0.66-1.27) | 5.91E-01 | 9.68E-01 |
| rs7250901  | 19 FOSB   | 0.50 Rec | 0.9(0.62-1.31)  | 5.94E-01 | 9.89E-01 |
| rs7245548  | 19 FOSB   | 0.50 Rec | 0.9(0.62-1.3)   | 5.70E-01 | 9.93E-01 |
| rs6509214  | 19 FOSB   | 0.50 Rec | 0.9(0.62-1.3)   | 5.70E-01 | 9.93E-01 |
| rs3760846  | 19 FOSB   | 0.23 Dom | 0.86(0.62-1.19) | 3.49E-01 | 9.93E-01 |
| rs4511641  | 19 FOSB   | 0.22 Dom | 1.1(0.79-1.52)  | 5.79E-01 | 9.94E-01 |
| rs10402243 | 19 FOSB   | 0.40 Add | 0.97(0.78-1.22) | 8.20E-01 | 9.98E-01 |
| rs1603     | 19 FOSB   | 0.28 Rec | 1.08(0.61-1.88) | 7.98E-01 | 9.99E-01 |
| rs10819615 | 9 FREQ    | 0.09 Add | 1.42(0.99-2.05) | 5.95E-02 | 8.11E-01 |
| rs4240446  | 9 FREQ    | 0.04 Add | 1.61(0.99-2.62) | 5.64E-02 | 8.37E-01 |
| rs12346070 | 9 FREQ    | 0.10 Rec | 0(0-Inf)        | 9.72E-01 | 8.85E-01 |
| rs1342043  | 9 FREQ    | 0.05 Add | 1.47(0.94-2.32) | 9.43E-02 | 9.44E-01 |
| rs868964   | 9 FREQ    | 0.05 Add | 1.48(0.92-2.39) | 1.05E-01 | 9.52E-01 |
| rs709611   | 9 FREQ    | 0.21 Dom | 1.36(0.99-1.89) | 6.13E-02 | 9.53E-01 |
| rs917690   | 9 FREQ    | 0.17 Rec | 2.17(0.99-4.77) | 5.39E-02 | 9.54E-01 |
| rs4837480  | 9 FREQ    | 0.39 Dom | 0.74(0.54-1.03) | 7.35E-02 | 9.68E-01 |
| rs10819609 | 9 FREQ    | 0.39 Dom | 0.74(0.54-1.03) | 7.35E-02 | 9.68E-01 |
| rs13710    | 9 FREQ    | 0.22 Dom | 1.34(0.97-1.86) | 7.41E-02 | 9.69E-01 |
| rs3780707  | 9 FREQ    | 0.39 Dom | 0.75(0.54-1.03) | 7.91E-02 | 9.72E-01 |

|            |   |      |      |     |                 |          |          |
|------------|---|------|------|-----|-----------------|----------|----------|
| rs870811   | 9 | FREQ | 0.14 | Rec | 1.11(0.39-3.19) | 8.47E-01 | 9.77E-01 |
| rs7037293  | 9 | FREQ | 0.04 | Add | 1.44(0.89-2.33) | 1.41E-01 | 9.78E-01 |
| rs7867364  | 9 | FREQ | 0.03 | Add | 0.6(0.29-1.26)  | 1.80E-01 | 9.79E-01 |
| rs3780710  | 9 | FREQ | 0.40 | Dom | 0.76(0.54-1.05) | 9.50E-02 | 9.83E-01 |
| rs1557123  | 9 | FREQ | 0.23 | Add | 1.25(0.95-1.63) | 1.08E-01 | 9.83E-01 |
| rs12378342 | 9 | FREQ | 0.04 | Add | 1.42(0.84-2.38) | 1.88E-01 | 9.90E-01 |
| rs2900286  | 9 | FREQ | 0.15 | Rec | 2.17(0.86-5.51) | 1.02E-01 | 9.90E-01 |
| rs2277200  | 9 | FREQ | 0.15 | Rec | 2.17(0.86-5.51) | 1.02E-01 | 9.90E-01 |
| rs1054879  | 9 | FREQ | 0.18 | Add | 1.27(0.95-1.69) | 1.06E-01 | 9.90E-01 |
| rs13287767 | 9 | FREQ | 0.03 | Add | 1.43(0.82-2.49) | 2.03E-01 | 9.93E-01 |
| rs7022964  | 9 | FREQ | 0.04 | Add | 1.39(0.8-2.41)  | 2.47E-01 | 9.95E-01 |
| rs887534   | 9 | FREQ | 0.04 | Add | 1.39(0.8-2.41)  | 2.47E-01 | 9.95E-01 |
| rs3780714  | 9 | FREQ | 0.06 | Add | 1.31(0.84-2.02) | 2.30E-01 | 9.95E-01 |
| rs4837479  | 9 | FREQ | 0.32 | Dom | 0.79(0.57-1.09) | 1.49E-01 | 9.95E-01 |
| rs4836695  | 9 | FREQ | 0.10 | Rec | 0.37(0.05-2.93) | 3.43E-01 | 9.96E-01 |
| rs4836697  | 9 | FREQ | 0.10 | Rec | 0.37(0.05-2.93) | 3.43E-01 | 9.96E-01 |
| rs4240447  | 9 | FREQ | 0.10 | Rec | 0.37(0.05-2.93) | 3.43E-01 | 9.96E-01 |
| rs10988645 | 9 | FREQ | 0.10 | Dom | 0.8(0.52-1.23)  | 3.07E-01 | 9.97E-01 |
| rs3780711  | 9 | FREQ | 0.41 | Dom | 0.79(0.57-1.1)  | 1.71E-01 | 9.98E-01 |
| rs3829905  | 9 | FREQ | 0.15 | Rec | 2(0.75-5.32)    | 1.66E-01 | 9.99E-01 |
| rs4424362  | 9 | FREQ | 0.16 | Dom | 1.18(0.84-1.68) | 3.42E-01 | 9.99E-01 |
| rs7862394  | 9 | FREQ | 0.16 | Dom | 1.18(0.83-1.67) | 3.64E-01 | 9.99E-01 |
| rs13288372 | 9 | FREQ | 0.13 | Add | 1.18(0.85-1.64) | 3.23E-01 | 9.99E-01 |
| rs3824542  | 9 | FREQ | 0.32 | Dom | 0.81(0.59-1.11) | 1.94E-01 | 9.99E-01 |
| rs10819610 | 9 | FREQ | 0.15 | Dom | 1.17(0.83-1.67) | 3.72E-01 | 9.99E-01 |
| rs11552451 | 9 | FREQ | 0.11 | Add | 1.27(0.88-1.82) | 2.05E-01 | 9.99E-01 |
| rs7863731  | 9 | FREQ | 0.29 | Add | 1.16(0.91-1.47) | 2.34E-01 | 9.99E-01 |
| rs947513   | 9 | FREQ | 0.15 | Dom | 0.96(0.67-1.38) | 8.40E-01 | 9.99E-01 |
| rs10819611 | 9 | FREQ | 0.13 | Dom | 1.17(0.81-1.68) | 4.02E-01 | 9.99E-01 |
| rs7868148  | 9 | FREQ | 0.30 | Dom | 1.21(0.88-1.66) | 2.44E-01 | 9.99E-01 |
| rs3780712  | 9 | FREQ | 0.32 | Dom | 0.83(0.6-1.15)  | 2.60E-01 | 1.00E+00 |
| rs3897499  | 9 | FREQ | 0.11 | Add | 0.81(0.55-1.19) | 2.73E-01 | 1.00E+00 |
| rs7852859  | 9 | FREQ | 0.08 | Add | 0.85(0.55-1.32) | 4.64E-01 | 1.00E+00 |
| rs10988625 | 9 | FREQ | 0.43 | Dom | 0.84(0.6-1.17)  | 2.92E-01 | 1.00E+00 |
| rs3780709  | 9 | FREQ | 0.09 | Dom | 0.86(0.56-1.33) | 5.08E-01 | 1.00E+00 |
| rs7847694  | 9 | FREQ | 0.27 | Rec | 0.72(0.36-1.45) | 3.64E-01 | 1.00E+00 |
| rs9802616  | 9 | FREQ | 0.06 | Dom | 1.22(0.73-2.03) | 4.50E-01 | 1.00E+00 |

|            |    |      |      |     |                 |          |          |
|------------|----|------|------|-----|-----------------|----------|----------|
| rs3824544  | 9  | FREQ | 0.10 | Dom | 1.07(0.7-1.62)  | 7.66E-01 | 1.00E+00 |
| rs10988653 | 9  | FREQ | 0.06 | Dom | 0.84(0.51-1.39) | 4.94E-01 | 1.00E+00 |
| rs11789529 | 9  | FREQ | 0.16 | Dom | 1.09(0.77-1.55) | 6.29E-01 | 1.00E+00 |
| rs1009502  | 9  | FREQ | 0.10 | Add | 1.07(0.73-1.56) | 7.31E-01 | 1.00E+00 |
| rs7873936  | 9  | FREQ | 0.11 | Rec | 1.65(0.41-6.58) | 4.82E-01 | 1.00E+00 |
| rs1017112  | 9  | FREQ | 0.28 | Dom | 0.88(0.64-1.22) | 4.50E-01 | 1.00E+00 |
| rs3780708  | 9  | FREQ | 0.23 | Dom | 0.89(0.64-1.23) | 4.73E-01 | 1.00E+00 |
| rs12003792 | 9  | FREQ | 0.09 | Add | 1.01(0.67-1.51) | 9.71E-01 | 1.00E+00 |
| rs7023210  | 9  | FREQ | 0.15 | Dom | 0.96(0.67-1.37) | 8.14E-01 | 1.00E+00 |
| rs12376641 | 9  | FREQ | 0.03 | Add | 1.14(0.61-2.15) | 6.83E-01 | 1.00E+00 |
| rs740918   | 9  | FREQ | 0.10 | Add | 1.06(0.72-1.55) | 7.61E-01 | 1.00E+00 |
| rs7849345  | 9  | FREQ | 0.16 | Add | 0.99(0.73-1.34) | 9.33E-01 | 1.00E+00 |
| rs7856531  | 9  | FREQ | 0.14 | Rec | 1.21(0.42-3.5)  | 7.27E-01 | 1.00E+00 |
| rs7045735  | 9  | FREQ | 0.14 | Rec | 1.26(0.47-3.38) | 6.51E-01 | 1.00E+00 |
| rs7024495  | 9  | FREQ | 0.14 | Dom | 1.02(0.7-1.47)  | 9.24E-01 | 1.00E+00 |
| rs3780715  | 9  | FREQ | 0.14 | Dom | 1.02(0.7-1.47)  | 9.21E-01 | 1.00E+00 |
| rs3761264  | 20 | GNAS | 0.18 | Rec | 0.18(0.02-1.32) | 9.05E-02 | 6.60E-01 |
| rs3730168  | 20 | GNAS | 0.25 | Rec | 1.81(1.04-3.15) | 3.64E-02 | 8.16E-01 |
| rs4810147  | 20 | GNAS | 0.16 | Rec | 0.21(0.03-1.57) | 1.28E-01 | 8.71E-01 |
| rs4812040  | 20 | GNAS | 0.16 | Rec | 0.21(0.03-1.63) | 1.37E-01 | 8.99E-01 |
| rs6123833  | 20 | GNAS | 0.16 | Rec | 0.21(0.03-1.63) | 1.37E-01 | 8.99E-01 |
| rs6026592  | 20 | GNAS | 0.28 | Dom | 1.35(0.98-1.86) | 6.71E-02 | 9.13E-01 |
| rs1800900  | 20 | GNAS | 0.16 | Rec | 0.23(0.03-1.74) | 1.55E-01 | 9.34E-01 |
| rs6123832  | 20 | GNAS | 0.17 | Rec | 0.23(0.03-1.76) | 1.59E-01 | 9.41E-01 |
| rs6128461  | 20 | GNAS | 0.28 | Dom | 1.32(0.96-1.82) | 8.48E-02 | 9.48E-01 |
| rs2180696  | 20 | GNAS | 0.33 | Dom | 1.33(0.96-1.84) | 8.46E-02 | 9.50E-01 |
| rs2057291  | 20 | GNAS | 0.25 | Dom | 1.32(0.96-1.82) | 8.64E-02 | 9.50E-01 |
| rs965808   | 20 | GNAS | 0.17 | Rec | 0.25(0.03-1.86) | 1.75E-01 | 9.61E-01 |
| rs6026584  | 20 | GNAS | 0.26 | Dom | 1.3(0.95-1.79)  | 1.05E-01 | 9.69E-01 |
| rs3787493  | 20 | GNAS | 0.32 | Add | 1.21(0.96-1.53) | 1.08E-01 | 9.74E-01 |
| rs3730170  | 20 | GNAS | 0.02 | Add | 0.97(0.41-2.28) | 9.38E-01 | 9.77E-01 |
| rs919197   | 20 | GNAS | 0.32 | Add | 1.2(0.95-1.51)  | 1.31E-01 | 9.88E-01 |
| rs234628   | 20 | GNAS | 0.32 | Dom | 1.26(0.92-1.74) | 1.55E-01 | 9.94E-01 |
| rs8121252  | 20 | GNAS | 0.26 | Dom | 1.26(0.92-1.74) | 1.53E-01 | 9.94E-01 |
| rs13831    | 20 | GNAS | 0.26 | Dom | 1.26(0.92-1.74) | 1.53E-01 | 9.94E-01 |
| rs2145288  | 20 | GNAS | 0.14 | Rec | 0.29(0.04-2.25) | 2.38E-01 | 9.95E-01 |
| rs234629   | 20 | GNAS | 0.32 | Dom | 1.26(0.91-1.74) | 1.60E-01 | 9.95E-01 |

|            |         |          |                 |          |          |
|------------|---------|----------|-----------------|----------|----------|
| rs7273251  | 20 GNAS | 0.01 Add | 1.63(0.6-4.41)  | 3.36E-01 | 9.97E-01 |
| rs919196   | 20 GNAS | 0.18 Dom | 1.19(0.85-1.66) | 3.14E-01 | 9.97E-01 |
| rs234630   | 20 GNAS | 0.14 Dom | 1.19(0.83-1.71) | 3.47E-01 | 9.98E-01 |
| rs6123836  | 20 GNAS | 0.32 Dom | 1.21(0.88-1.68) | 2.38E-01 | 9.98E-01 |
| rs4810148  | 20 GNAS | 0.32 Dom | 1.21(0.88-1.68) | 2.38E-01 | 9.98E-01 |
| rs3787496  | 20 GNAS | 0.07 Add | 1.2(0.78-1.85)  | 3.99E-01 | 9.98E-01 |
| rs234623   | 20 GNAS | 0.43 Dom | 1.22(0.86-1.73) | 2.57E-01 | 9.99E-01 |
| rs6100269  | 20 GNAS | 0.09 Dom | 1.01(0.66-1.54) | 9.67E-01 | 9.99E-01 |
| rs4812042  | 20 GNAS | 0.26 Dom | 1.19(0.87-1.64) | 2.76E-01 | 9.99E-01 |
| rs234625   | 20 GNAS | 0.25 Rec | 1.39(0.76-2.55) | 2.79E-01 | 9.99E-01 |
| rs151331   | 20 GNAS | 0.25 Rec | 1.39(0.76-2.55) | 2.79E-01 | 9.99E-01 |
| rs234618   | 20 GNAS | 0.25 Rec | 1.39(0.76-2.55) | 2.79E-01 | 9.99E-01 |
| rs234621   | 20 GNAS | 0.25 Rec | 1.39(0.76-2.55) | 2.79E-01 | 9.99E-01 |
| rs7271854  | 20 GNAS | 0.32 Dom | 1.18(0.86-1.64) | 3.10E-01 | 9.99E-01 |
| rs6015389  | 20 GNAS | 0.02 Add | 1.04(0.46-2.36) | 9.27E-01 | 1.00E+00 |
| rs12479894 | 20 GNAS | 0.02 Add | 0.81(0.32-2.05) | 6.61E-01 | 1.00E+00 |
| rs6026562  | 20 GNAS | 0.02 Add | 0.81(0.32-2.05) | 6.61E-01 | 1.00E+00 |
| rs35113254 | 20 GNAS | 0.02 Add | 0.81(0.32-2.05) | 6.61E-01 | 1.00E+00 |
| rs6026557  | 20 GNAS | 0.11 Rec | 0.69(0.15-3.19) | 6.39E-01 | 1.00E+00 |
| rs12625436 | 20 GNAS | 0.34 Add | 1.08(0.84-1.38) | 5.43E-01 | 1.00E+00 |
| rs7121     | 20 GNAS | 0.33 Rec | 1.15(0.71-1.87) | 5.63E-01 | 1.00E+00 |
| rs6026574  | 20 GNAS | 0.26 Dom | 1.16(0.84-1.59) | 3.71E-01 | 1.00E+00 |
| rs6026567  | 20 GNAS | 0.31 Rec | 0.89(0.49-1.61) | 6.96E-01 | 1.00E+00 |
| rs2295583  | 20 GNAS | 0.05 Add | 1.1(0.66-1.86)  | 7.13E-01 | 1.00E+00 |
| rs6026561  | 20 GNAS | 0.02 Add | 1.07(0.47-2.43) | 8.75E-01 | 1.00E+00 |
| rs8125112  | 20 GNAS | 0.02 Add | 0.92(0.39-2.2)  | 8.53E-01 | 1.00E+00 |
| rs6026593  | 20 GNAS | 0.10 Add | 1.04(0.71-1.53) | 8.41E-01 | 1.00E+00 |
| rs234627   | 20 GNAS | 0.24 Rec | 1.14(0.6-2.18)  | 6.84E-01 | 1.00E+00 |
| rs5751574  | 22 GNAZ | 0.41 Dom | 1.04(0.74-1.46) | 8.11E-01 | 9.63E-01 |
| rs2283802  | 22 GNAZ | 0.35 Rec | 0.7(0.41-1.18)  | 1.81E-01 | 9.73E-01 |
| rs4820537  | 22 GNAZ | 0.39 Dom | 1.27(0.91-1.78) | 1.64E-01 | 9.78E-01 |
| rs9306383  | 22 GNAZ | 0.07 Dom | 1.28(0.8-2.06)  | 2.99E-01 | 9.78E-01 |
| rs2267005  | 22 GNAZ | 0.42 Dom | 1.28(0.9-1.81)  | 1.67E-01 | 9.78E-01 |
| rs756631   | 22 GNAZ | 0.42 Dom | 1.28(0.9-1.81)  | 1.67E-01 | 9.78E-01 |
| rs885965   | 22 GNAZ | 0.42 Dom | 1.28(0.9-1.81)  | 1.67E-01 | 9.78E-01 |
| rs885963   | 22 GNAZ | 0.42 Dom | 1.28(0.9-1.81)  | 1.67E-01 | 9.78E-01 |
| rs885964   | 22 GNAZ | 0.41 Dom | 1.25(0.89-1.77) | 1.98E-01 | 9.78E-01 |

|            |         |          |                 |          |          |
|------------|---------|----------|-----------------|----------|----------|
| rs9612237  | 22 GNAZ | 0.41 Dom | 1.25(0.89-1.76) | 2.02E-01 | 9.80E-01 |
| rs6003518  | 22 GNAZ | 0.41 Dom | 1.24(0.88-1.75) | 2.11E-01 | 9.83E-01 |
| rs1051875  | 22 GNAZ | 0.41 Dom | 1.24(0.88-1.75) | 2.11E-01 | 9.83E-01 |
| rs5751587  | 22 GNAZ | 0.41 Dom | 1.24(0.88-1.75) | 2.11E-01 | 9.83E-01 |
| rs4822359  | 22 GNAZ | 0.41 Dom | 1.24(0.88-1.75) | 2.11E-01 | 9.83E-01 |
| rs3788347  | 22 GNAZ | 0.41 Dom | 1.24(0.88-1.75) | 2.11E-01 | 9.83E-01 |
| rs9612234  | 22 GNAZ | 0.41 Dom | 1.24(0.88-1.75) | 2.11E-01 | 9.83E-01 |
| rs916584   | 22 GNAZ | 0.41 Dom | 1.24(0.88-1.75) | 2.11E-01 | 9.83E-01 |
| rs5751589  | 22 GNAZ | 0.41 Dom | 1.24(0.88-1.75) | 2.11E-01 | 9.83E-01 |
| rs916585   | 22 GNAZ | 0.41 Dom | 1.24(0.88-1.75) | 2.11E-01 | 9.83E-01 |
| rs3788350  | 22 GNAZ | 0.41 Dom | 1.24(0.88-1.75) | 2.11E-01 | 9.83E-01 |
| rs916583   | 22 GNAZ | 0.41 Dom | 1.24(0.88-1.75) | 2.11E-01 | 9.83E-01 |
| rs4822357  | 22 GNAZ | 0.41 Dom | 1.24(0.88-1.75) | 2.11E-01 | 9.83E-01 |
| rs756632   | 22 GNAZ | 0.05 Dom | 0.75(0.41-1.36) | 3.47E-01 | 9.84E-01 |
| rs9608071  | 22 GNAZ | 0.04 Add | 1.29(0.78-2.14) | 3.27E-01 | 9.84E-01 |
| rs13054904 | 22 GNAZ | 0.04 Add | 1.29(0.78-2.14) | 3.27E-01 | 9.84E-01 |
| rs3788348  | 22 GNAZ | 0.41 Dom | 1.24(0.88-1.75) | 2.16E-01 | 9.85E-01 |
| rs2267000  | 22 GNAZ | 0.40 Dom | 1.24(0.88-1.74) | 2.24E-01 | 9.85E-01 |
| rs2157710  | 22 GNAZ | 0.40 Dom | 1.24(0.88-1.74) | 2.24E-01 | 9.85E-01 |
| rs2283803  | 22 GNAZ | 0.40 Dom | 1.24(0.88-1.74) | 2.24E-01 | 9.85E-01 |
| rs9612225  | 22 GNAZ | 0.04 Add | 1.28(0.77-2.12) | 3.39E-01 | 9.87E-01 |
| rs13054331 | 22 GNAZ | 0.04 Add | 1.28(0.77-2.12) | 3.39E-01 | 9.87E-01 |
| rs2267001  | 22 GNAZ | 0.40 Dom | 1.23(0.87-1.73) | 2.37E-01 | 9.89E-01 |
| rs2267004  | 22 GNAZ | 0.40 Dom | 1.23(0.87-1.73) | 2.37E-01 | 9.89E-01 |
| rs13054985 | 22 GNAZ | 0.40 Dom | 1.23(0.87-1.73) | 2.37E-01 | 9.89E-01 |
| rs2267003  | 22 GNAZ | 0.40 Dom | 1.23(0.87-1.73) | 2.37E-01 | 9.89E-01 |
| rs3788351  | 22 GNAZ | 0.41 Dom | 1.23(0.87-1.73) | 2.45E-01 | 9.91E-01 |
| rs5759593  | 22 GNAZ | 0.41 Dom | 1.21(0.86-1.7)  | 2.82E-01 | 9.94E-01 |
| rs13055979 | 22 GNAZ | 0.05 Add | 1.23(0.74-2.05) | 4.18E-01 | 9.95E-01 |
| rs9624019  | 22 GNAZ | 0.37 Rec | 0.99(0.63-1.56) | 9.60E-01 | 9.98E-01 |
| rs12484077 | 22 GNAZ | 0.06 Add | 0.85(0.51-1.42) | 5.28E-01 | 9.98E-01 |
| rs3810614  | 22 GNAZ | 0.38 Dom | 1.15(0.83-1.61) | 4.02E-01 | 9.99E-01 |
| rs5751583  | 22 GNAZ | 0.50 Dom | 0.91(0.63-1.32) | 6.30E-01 | 9.99E-01 |
| rs3788340  | 22 GNAZ | 0.40 Rec | 1.02(0.67-1.56) | 9.27E-01 | 9.99E-01 |
| rs2266999  | 22 GNAZ | 0.46 Rec | 0.96(0.64-1.44) | 8.49E-01 | 1.00E+00 |
| rs1858746  | 22 GNAZ | 0.40 Dom | 1.1(0.79-1.54)  | 5.74E-01 | 1.00E+00 |
| rs2266996  | 22 GNAZ | 0.40 Dom | 1.1(0.79-1.54)  | 5.74E-01 | 1.00E+00 |

|            |         |          |                 |          |          |
|------------|---------|----------|-----------------|----------|----------|
| rs5751579  | 22 GNAZ | 0.37 Add | 1.01(0.8-1.28)  | 9.09E-01 | 1.00E+00 |
| rs2266997  | 22 GNAZ | 0.39 Dom | 1.12(0.81-1.57) | 4.92E-01 | 1.00E+00 |
| rs2266998  | 22 GNAZ | 0.39 Dom | 1.12(0.81-1.57) | 4.92E-01 | 1.00E+00 |
| rs874138   | 22 GNAZ | 0.38 Dom | 1.12(0.81-1.57) | 4.92E-01 | 1.00E+00 |
| rs1805058  | 22 GNAZ | 0.38 Dom | 1.12(0.81-1.57) | 4.92E-01 | 1.00E+00 |
| rs2266995  | 22 GNAZ | 0.38 Dom | 1.12(0.81-1.57) | 4.92E-01 | 1.00E+00 |
| rs6003502  | 22 GNAZ | 0.38 Dom | 1.12(0.81-1.57) | 4.92E-01 | 1.00E+00 |
| rs2330336  | 22 GNAZ | 0.38 Dom | 1.12(0.81-1.57) | 4.92E-01 | 1.00E+00 |
| rs1989778  | 22 GNAZ | 0.38 Dom | 1.12(0.81-1.57) | 4.92E-01 | 1.00E+00 |
| rs1989777  | 22 GNAZ | 0.38 Dom | 1.12(0.81-1.57) | 4.92E-01 | 1.00E+00 |
| rs1989776  | 22 GNAZ | 0.38 Dom | 1.12(0.81-1.57) | 4.92E-01 | 1.00E+00 |
| rs5751576  | 22 GNAZ | 0.38 Dom | 1.12(0.81-1.57) | 4.92E-01 | 1.00E+00 |
| rs5759580  | 22 GNAZ | 0.38 Dom | 1.12(0.81-1.57) | 4.92E-01 | 1.00E+00 |
| rs3827315  | 22 GNAZ | 0.38 Dom | 1.12(0.81-1.57) | 4.92E-01 | 1.00E+00 |
| rs3788342  | 22 GNAZ | 0.38 Dom | 1.12(0.81-1.57) | 4.92E-01 | 1.00E+00 |
| rs5751578  | 22 GNAZ | 0.38 Dom | 1.12(0.81-1.57) | 4.92E-01 | 1.00E+00 |
| rs3788343  | 22 GNAZ | 0.38 Dom | 1.12(0.81-1.57) | 4.92E-01 | 1.00E+00 |
| rs6519411  | 22 GNAZ | 0.38 Dom | 1.12(0.8-1.56)  | 5.12E-01 | 1.00E+00 |
| rs4822354  | 22 GNAZ | 0.38 Dom | 1.12(0.8-1.56)  | 5.12E-01 | 1.00E+00 |
| rs3788346  | 22 GNAZ | 0.38 Dom | 1.12(0.8-1.56)  | 5.12E-01 | 1.00E+00 |
| rs4820536  | 22 GNAZ | 0.38 Dom | 1.12(0.8-1.56)  | 5.12E-01 | 1.00E+00 |
| rs2330338  | 22 GNAZ | 0.39 Dom | 1.12(0.8-1.56)  | 5.23E-01 | 1.00E+00 |
| rs3788341  | 22 GNAZ | 0.43 Dom | 1.13(0.8-1.6)   | 4.88E-01 | 1.00E+00 |
| rs885962   | 22 GNAZ | 0.39 Dom | 1.12(0.8-1.56)  | 5.12E-01 | 1.00E+00 |
| rs739362   | 22 GNAZ | 0.37 Dom | 1.12(0.8-1.55)  | 5.10E-01 | 1.00E+00 |
| rs3788337  | 22 GNAZ | 0.41 Dom | 1.04(0.75-1.46) | 8.08E-01 | 1.00E+00 |
| rs3788339  | 22 GNAZ | 0.36 Dom | 1.1(0.79-1.53)  | 5.63E-01 | 1.00E+00 |
| rs12940914 | 17 GRB2 | 0.03 Add | 1.01(0.49-2.1)  | 9.70E-01 | 9.70E-01 |
| rs4788889  | 17 GRB2 | 0.03 Add | 1.01(0.49-2.1)  | 9.70E-01 | 9.70E-01 |
| rs4789186  | 17 GRB2 | 0.03 Add | 1.01(0.49-2.1)  | 9.70E-01 | 9.70E-01 |
| rs9901434  | 17 GRB2 | 0.03 Add | 1.01(0.49-2.1)  | 9.70E-01 | 9.70E-01 |
| rs930296   | 17 GRB2 | 0.07 Add | 0.82(0.5-1.34)  | 4.19E-01 | 9.73E-01 |
| rs4789193  | 17 GRB2 | 0.04 Add | 0.78(0.4-1.51)  | 4.63E-01 | 9.77E-01 |
| rs7207506  | 17 GRB2 | 0.04 Add | 0.78(0.4-1.51)  | 4.63E-01 | 9.77E-01 |
| rs8067903  | 17 GRB2 | 0.06 Add | 0.82(0.51-1.33) | 4.23E-01 | 9.78E-01 |
| rs4789172  | 17 GRB2 | 0.24 Dom | 1.21(0.88-1.67) | 2.34E-01 | 9.80E-01 |
| rs7207618  | 17 GRB2 | 0.10 Add | 0.86(0.58-1.29) | 4.72E-01 | 9.88E-01 |

|            |         |          |                 |          |          |
|------------|---------|----------|-----------------|----------|----------|
| rs8079197  | 17 GRB2 | 0.10 Dom | 0.87(0.58-1.33) | 5.25E-01 | 9.89E-01 |
| rs4789189  | 17 GRB2 | 0.07 Add | 0.85(0.53-1.35) | 4.86E-01 | 9.90E-01 |
| rs2053156  | 17 GRB2 | 0.07 Add | 0.85(0.53-1.35) | 4.86E-01 | 9.90E-01 |
| rs2053158  | 17 GRB2 | 0.07 Add | 0.85(0.53-1.35) | 4.86E-01 | 9.90E-01 |
| rs4542691  | 17 GRB2 | 0.10 Dom | 0.88(0.58-1.33) | 5.45E-01 | 9.92E-01 |
| rs4789178  | 17 GRB2 | 0.07 Add | 0.85(0.53-1.36) | 5.06E-01 | 9.93E-01 |
| rs9902966  | 17 GRB2 | 0.07 Add | 0.85(0.53-1.36) | 5.06E-01 | 9.93E-01 |
| rs930297   | 17 GRB2 | 0.07 Add | 0.85(0.53-1.36) | 5.06E-01 | 9.93E-01 |
| rs12946365 | 17 GRB2 | 0.10 Dom | 0.88(0.58-1.34) | 5.66E-01 | 9.94E-01 |
| rs4559942  | 17 GRB2 | 0.09 Add | 0.89(0.6-1.32)  | 5.61E-01 | 9.94E-01 |
| rs9909076  | 17 GRB2 | 0.07 Add | 0.86(0.54-1.38) | 5.30E-01 | 9.95E-01 |
| rs2117563  | 17 GRB2 | 0.07 Add | 0.86(0.54-1.38) | 5.33E-01 | 9.95E-01 |
| rs2033607  | 17 GRB2 | 0.07 Add | 0.86(0.54-1.38) | 5.33E-01 | 9.95E-01 |
| rs7222002  | 17 GRB2 | 0.07 Add | 0.86(0.54-1.38) | 5.33E-01 | 9.95E-01 |
| rs9908820  | 17 GRB2 | 0.06 Add | 0.96(0.6-1.55)  | 8.82E-01 | 9.95E-01 |
| rs4789173  | 17 GRB2 | 0.07 Add | 0.87(0.54-1.39) | 5.54E-01 | 9.97E-01 |
| rs9302990  | 17 GRB2 | 0.07 Add | 0.87(0.54-1.39) | 5.54E-01 | 9.97E-01 |
| rs1369299  | 17 GRB2 | 0.07 Add | 0.87(0.54-1.39) | 5.54E-01 | 9.97E-01 |
| rs4789176  | 17 GRB2 | 0.07 Add | 0.87(0.54-1.39) | 5.54E-01 | 9.97E-01 |
| rs8065441  | 17 GRB2 | 0.07 Add | 0.87(0.54-1.38) | 5.53E-01 | 9.97E-01 |
| rs6501786  | 17 GRB2 | 0.07 Add | 0.87(0.54-1.4)  | 5.71E-01 | 9.97E-01 |
| rs4789181  | 17 GRB2 | 0.07 Add | 0.87(0.54-1.4)  | 5.71E-01 | 9.97E-01 |
| rs16967789 | 17 GRB2 | 0.03 Add | 0.96(0.48-1.9)  | 9.00E-01 | 9.97E-01 |
| rs4789170  | 17 GRB2 | 0.10 Add | 0.91(0.62-1.34) | 6.35E-01 | 9.97E-01 |
| rs9912608  | 17 GRB2 | 0.10 Add | 0.91(0.62-1.34) | 6.35E-01 | 9.97E-01 |
| rs3744233  | 17 GRB2 | 0.03 Add | 0.85(0.44-1.65) | 6.32E-01 | 9.98E-01 |
| rs12945469 | 17 GRB2 | 0.06 Add | 0.89(0.54-1.47) | 6.49E-01 | 9.98E-01 |
| rs4789182  | 17 GRB2 | 0.10 Add | 0.92(0.63-1.35) | 6.70E-01 | 9.98E-01 |
| rs9892166  | 17 GRB2 | 0.10 Add | 0.92(0.63-1.35) | 6.70E-01 | 9.98E-01 |
| rs9909443  | 17 GRB2 | 0.03 Add | 1.06(0.55-2.07) | 8.56E-01 | 9.98E-01 |
| rs9914731  | 17 GRB2 | 0.03 Add | 0.84(0.42-1.69) | 6.25E-01 | 9.98E-01 |
| rs4788891  | 17 GRB2 | 0.03 Add | 0.84(0.42-1.69) | 6.25E-01 | 9.98E-01 |
| rs4789188  | 17 GRB2 | 0.03 Add | 0.84(0.42-1.69) | 6.25E-01 | 9.98E-01 |
| rs2891713  | 17 GRB2 | 0.03 Add | 0.93(0.45-1.92) | 8.49E-01 | 9.98E-01 |
| rs4788890  | 17 GRB2 | 0.03 Add | 0.93(0.45-1.92) | 8.49E-01 | 9.98E-01 |
| rs12600908 | 17 GRB2 | 0.03 Add | 0.91(0.46-1.81) | 7.93E-01 | 9.99E-01 |
| rs4350602  | 17 GRB2 | 0.10 Add | 0.94(0.64-1.37) | 7.37E-01 | 9.99E-01 |

|            |          |          |                 |          |          |
|------------|----------|----------|-----------------|----------|----------|
| rs12950752 | 17 GRB2  | 0.09 Add | 0.92(0.61-1.38) | 6.80E-01 | 9.99E-01 |
| rs7219     | 17 GRB2  | 0.12 Rec | 0.65(0.14-3.04) | 5.81E-01 | 9.99E-01 |
| rs6501775  | 17 GRB2  | 0.07 Add | 0.9(0.57-1.41)  | 6.49E-01 | 9.99E-01 |
| rs9897815  | 17 GRB2  | 0.02 Add | 1.14(0.56-2.29) | 7.21E-01 | 9.99E-01 |
| rs8081778  | 17 GRB2  | 0.07 Add | 0.92(0.58-1.44) | 7.05E-01 | 9.99E-01 |
| rs10914456 | 1 HCRTR1 | 0.28 Dom | 1.6(1.16-2.21)  | 4.43E-03 | 5.25E-02 |
| rs3753612  | 1 HCRTR1 | 0.28 Dom | 1.59(1.15-2.2)  | 4.62E-03 | 5.46E-02 |
| rs4949454  | 1 HCRTR1 | 0.26 Dom | 1.51(1.09-2.08) | 1.20E-02 | 1.24E-01 |
| rs10914458 | 1 HCRTR1 | 0.26 Dom | 1.51(1.09-2.08) | 1.20E-02 | 1.24E-01 |
| rs7529064  | 1 HCRTR1 | 0.27 Dom | 1.51(1.09-2.08) | 1.24E-02 | 1.27E-01 |
| rs2176807  | 1 HCRTR1 | 0.27 Dom | 1.51(1.09-2.08) | 1.27E-02 | 1.29E-01 |
| rs6703093  | 1 HCRTR1 | 0.26 Dom | 1.51(1.09-2.08) | 1.27E-02 | 1.29E-01 |
| rs2271933  | 1 HCRTR1 | 0.27 Dom | 1.51(1.09-2.08) | 1.27E-02 | 1.29E-01 |
| rs968335   | 1 HCRTR1 | 0.26 Dom | 1.5(1.09-2.07)  | 1.36E-02 | 1.35E-01 |
| rs3753614  | 1 HCRTR1 | 0.27 Dom | 1.49(1.08-2.06) | 1.47E-02 | 1.42E-01 |
| rs3753613  | 1 HCRTR1 | 0.27 Dom | 1.49(1.08-2.06) | 1.47E-02 | 1.42E-01 |
| rs10798882 | 1 HCRTR1 | 0.28 Add | 1.3(1.01-1.67)  | 3.92E-02 | 3.08E-01 |
| rs10914453 | 1 HCRTR1 | 0.32 Dom | 1.38(1-1.91)    | 5.07E-02 | 3.09E-01 |
| rs7524405  | 1 HCRTR1 | 0.29 Add | 1.28(1.01-1.64) | 4.33E-02 | 3.22E-01 |
| rs871634   | 1 HCRTR1 | 0.31 Dom | 1.36(0.98-1.88) | 6.24E-02 | 3.38E-01 |
| rs10798880 | 1 HCRTR1 | 0.32 Dom | 1.29(0.93-1.78) | 1.22E-01 | 5.31E-01 |
| rs7546297  | 1 HCRTR1 | 0.32 Dom | 1.29(0.94-1.78) | 1.20E-01 | 5.36E-01 |
| rs10914457 | 1 HCRTR1 | 0.14 Rec | 1.62(0.62-4.22) | 3.22E-01 | 5.47E-01 |
| rs12402191 | 1 HCRTR1 | 0.06 Add | 1.08(0.69-1.69) | 7.35E-01 | 7.36E-01 |
| rs3122169  | 6 HCRTR2 | 0.46 Add | 0.7(0.56-0.89)  | 2.74E-03 | 1.86E-01 |
| rs2811239  | 6 HCRTR2 | 0.40 Rec | 0.52(0.31-0.87) | 1.23E-02 | 4.34E-01 |
| rs3134711  | 6 HCRTR2 | 0.25 Add | 1.4(1.09-1.8)   | 9.40E-03 | 4.82E-01 |
| rs3122164  | 6 HCRTR2 | 0.25 Add | 1.39(1.08-1.78) | 1.01E-02 | 5.00E-01 |
| rs3122160  | 6 HCRTR2 | 0.20 Add | 1.38(1.06-1.81) | 1.83E-02 | 6.88E-01 |
| rs7771240  | 6 HCRTR2 | 0.19 Add | 1.39(1.06-1.82) | 1.82E-02 | 6.89E-01 |
| rs9349774  | 6 HCRTR2 | 0.19 Add | 1.39(1.06-1.82) | 1.86E-02 | 6.93E-01 |
| rs4631286  | 6 HCRTR2 | 0.20 Add | 1.38(1.05-1.81) | 2.00E-02 | 7.15E-01 |
| rs4311511  | 6 HCRTR2 | 0.20 Add | 1.38(1.05-1.81) | 2.04E-02 | 7.21E-01 |
| rs9382471  | 6 HCRTR2 | 0.19 Add | 1.38(1.05-1.81) | 2.10E-02 | 7.30E-01 |
| rs7741664  | 6 HCRTR2 | 0.19 Add | 1.38(1.05-1.81) | 2.10E-02 | 7.30E-01 |
| rs9357853  | 6 HCRTR2 | 0.19 Add | 1.38(1.05-1.81) | 2.10E-02 | 7.30E-01 |
| rs9396069  | 6 HCRTR2 | 0.19 Add | 1.38(1.05-1.81) | 2.10E-02 | 7.31E-01 |



|            |          |          |                 |          |          |
|------------|----------|----------|-----------------|----------|----------|
| rs9367624  | 6 HCRTR2 | 0.19 Add | 1.38(1.05-1.81) | 2.12E-02 | 7.31E-01 |
| rs9357849  | 6 HCRTR2 | 0.19 Add | 1.38(1.05-1.81) | 2.12E-02 | 7.32E-01 |
| rs4311512  | 6 HCRTR2 | 0.19 Add | 1.38(1.05-1.81) | 2.12E-02 | 7.32E-01 |
| rs9349771  | 6 HCRTR2 | 0.19 Add | 1.37(1.04-1.8)  | 2.61E-02 | 7.93E-01 |
| rs9367626  | 6 HCRTR2 | 0.19 Add | 1.37(1.04-1.8)  | 2.61E-02 | 7.94E-01 |
| rs12660136 | 6 HCRTR2 | 0.49 Rec | 1.48(1.04-2.1)  | 2.83E-02 | 8.18E-01 |
| rs7754675  | 6 HCRTR2 | 0.19 Add | 1.36(1.03-1.78) | 2.92E-02 | 8.20E-01 |
| rs9357850  | 6 HCRTR2 | 0.19 Add | 1.36(1.03-1.78) | 2.92E-02 | 8.21E-01 |
| rs9349772  | 6 HCRTR2 | 0.19 Add | 1.36(1.03-1.78) | 2.92E-02 | 8.21E-01 |
| rs9357855  | 6 HCRTR2 | 0.19 Add | 1.36(1.03-1.78) | 2.92E-02 | 8.21E-01 |
| rs9357851  | 6 HCRTR2 | 0.19 Add | 1.36(1.03-1.78) | 2.92E-02 | 8.21E-01 |
| rs4530845  | 6 HCRTR2 | 0.19 Add | 1.35(1.03-1.78) | 2.94E-02 | 8.22E-01 |
| rs9349768  | 6 HCRTR2 | 0.19 Add | 1.35(1.03-1.78) | 2.94E-02 | 8.22E-01 |
| rs9396062  | 6 HCRTR2 | 0.19 Add | 1.35(1.03-1.78) | 2.94E-02 | 8.22E-01 |
| rs9396063  | 6 HCRTR2 | 0.19 Add | 1.35(1.03-1.78) | 2.94E-02 | 8.22E-01 |
| rs9382465  | 6 HCRTR2 | 0.19 Add | 1.35(1.03-1.78) | 2.94E-02 | 8.23E-01 |
| rs4496804  | 6 HCRTR2 | 0.19 Add | 1.35(1.03-1.77) | 3.11E-02 | 8.37E-01 |
| rs7758861  | 6 HCRTR2 | 0.03 Add | 1.67(0.94-2.95) | 7.79E-02 | 8.89E-01 |
| rs1553332  | 6 HCRTR2 | 0.32 Rec | 1.7(1.02-2.83)  | 4.05E-02 | 9.11E-01 |
| rs4074181  | 6 HCRTR2 | 0.19 Add | 1.31(0.99-1.73) | 5.49E-02 | 9.42E-01 |
| rs7452651  | 6 HCRTR2 | 0.17 Add | 1.31(0.98-1.74) | 6.77E-02 | 9.49E-01 |
| rs9475214  | 6 HCRTR2 | 0.23 Add | 1.28(0.99-1.65) | 6.09E-02 | 9.53E-01 |
| rs1542896  | 6 HCRTR2 | 0.22 Rec | 1.99(0.98-4.01) | 5.52E-02 | 9.57E-01 |
| rs12191932 | 6 HCRTR2 | 0.22 Rec | 1.99(0.98-4.01) | 5.52E-02 | 9.57E-01 |
| rs10456702 | 6 HCRTR2 | 0.22 Rec | 1.99(0.98-4.01) | 5.52E-02 | 9.57E-01 |
| rs2292041  | 6 HCRTR2 | 0.22 Rec | 1.99(0.98-4.01) | 5.52E-02 | 9.57E-01 |
| rs9382460  | 6 HCRTR2 | 0.30 Rec | 1.6(0.97-2.64)  | 6.45E-02 | 9.58E-01 |
| rs4467775  | 6 HCRTR2 | 0.30 Rec | 1.6(0.97-2.64)  | 6.45E-02 | 9.58E-01 |
| rs3122167  | 6 HCRTR2 | 0.30 Add | 1.23(0.97-1.57) | 8.82E-02 | 9.60E-01 |
| rs1910123  | 6 HCRTR2 | 0.22 Rec | 1.97(0.98-3.98) | 5.78E-02 | 9.61E-01 |
| rs9370402  | 6 HCRTR2 | 0.02 Add | 0.51(0.19-1.34) | 1.73E-01 | 9.62E-01 |
| rs13198993 | 6 HCRTR2 | 0.03 Add | 1.01(0.48-2.12) | 9.76E-01 | 9.76E-01 |
| rs13200042 | 6 HCRTR2 | 0.03 Add | 1.01(0.48-2.12) | 9.76E-01 | 9.76E-01 |
| rs4609033  | 6 HCRTR2 | 0.03 Add | 1.01(0.48-2.12) | 9.76E-01 | 9.76E-01 |
| rs3122148  | 6 HCRTR2 | 0.25 Add | 1.25(0.97-1.62) | 8.44E-02 | 9.77E-01 |
| rs9396056  | 6 HCRTR2 | 0.16 Add | 1.25(0.93-1.68) | 1.43E-01 | 9.79E-01 |
| rs2653342  | 6 HCRTR2 | 0.07 Add | 0.7(0.42-1.17)  | 1.72E-01 | 9.79E-01 |

|            |          |          |                 |          |          |
|------------|----------|----------|-----------------|----------|----------|
| rs3134710  | 6 HCRTR2 | 0.24 Dom | 1.32(0.96-1.82) | 9.28E-02 | 9.82E-01 |
| rs7775745  | 6 HCRTR2 | 0.25 Add | 1.25(0.97-1.63) | 9.04E-02 | 9.82E-01 |
| rs6927478  | 6 HCRTR2 | 0.23 Rec | 1.54(0.82-2.88) | 1.78E-01 | 9.83E-01 |
| rs3122156  | 6 HCRTR2 | 0.24 Dom | 1.31(0.95-1.8)  | 1.04E-01 | 9.88E-01 |
| rs9367621  | 6 HCRTR2 | 0.34 Rec | 1.46(0.93-2.29) | 1.01E-01 | 9.88E-01 |
| rs9370399  | 6 HCRTR2 | 0.45 Add | 0.85(0.68-1.06) | 1.47E-01 | 9.89E-01 |
| rs3122162  | 6 HCRTR2 | 0.30 Add | 1.22(0.96-1.55) | 1.07E-01 | 9.89E-01 |
| rs9370403  | 6 HCRTR2 | 0.40 Add | 0.85(0.67-1.07) | 1.62E-01 | 9.90E-01 |
| rs6929837  | 6 HCRTR2 | 0.06 Add | 0.72(0.43-1.21) | 2.16E-01 | 9.91E-01 |
| rs6929450  | 6 HCRTR2 | 0.45 Add | 0.85(0.68-1.07) | 1.60E-01 | 9.93E-01 |
| rs7768760  | 6 HCRTR2 | 0.45 Add | 0.85(0.68-1.07) | 1.62E-01 | 9.93E-01 |
| rs12111375 | 6 HCRTR2 | 0.01 Add | 1.06(0.34-3.34) | 9.19E-01 | 9.94E-01 |
| rs12526414 | 6 HCRTR2 | 0.25 Dom | 1.2(0.87-1.65)  | 2.66E-01 | 9.94E-01 |
| rs10456182 | 6 HCRTR2 | 0.16 Dom | 1.22(0.87-1.73) | 2.49E-01 | 9.94E-01 |
| rs10456181 | 6 HCRTR2 | 0.16 Dom | 1.22(0.87-1.73) | 2.49E-01 | 9.94E-01 |
| rs3134704  | 6 HCRTR2 | 0.41 Rec | 0.78(0.5-1.2)   | 2.62E-01 | 9.94E-01 |
| rs2292040  | 6 HCRTR2 | 0.27 Dom | 0.78(0.57-1.08) | 1.36E-01 | 9.94E-01 |
| rs9382467  | 6 HCRTR2 | 0.29 Rec | 1.51(0.89-2.57) | 1.28E-01 | 9.94E-01 |
| rs10498801 | 6 HCRTR2 | 0.25 Rec | 1.45(0.78-2.71) | 2.39E-01 | 9.95E-01 |
| rs6937878  | 6 HCRTR2 | 0.25 Rec | 1.45(0.78-2.71) | 2.39E-01 | 9.95E-01 |
| rs10948894 | 6 HCRTR2 | 0.25 Rec | 1.45(0.78-2.71) | 2.39E-01 | 9.95E-01 |
| rs6937705  | 6 HCRTR2 | 0.25 Rec | 1.45(0.78-2.71) | 2.39E-01 | 9.95E-01 |
| rs3134699  | 6 HCRTR2 | 0.25 Rec | 1.45(0.78-2.71) | 2.39E-01 | 9.95E-01 |
| rs9367630  | 6 HCRTR2 | 0.27 Dom | 0.78(0.56-1.08) | 1.32E-01 | 9.95E-01 |
| rs3134701  | 6 HCRTR2 | 0.25 Rec | 1.45(0.78-2.71) | 2.39E-01 | 9.95E-01 |
| rs3134689  | 6 HCRTR2 | 0.25 Dom | 1.2(0.87-1.65)  | 2.73E-01 | 9.95E-01 |
| rs4236127  | 6 HCRTR2 | 0.25 Dom | 1.2(0.87-1.65)  | 2.73E-01 | 9.95E-01 |
| rs3122151  | 6 HCRTR2 | 0.25 Dom | 1.2(0.87-1.65)  | 2.73E-01 | 9.95E-01 |
| rs3006854  | 6 HCRTR2 | 0.25 Dom | 1.2(0.87-1.65)  | 2.73E-01 | 9.95E-01 |
| rs3134705  | 6 HCRTR2 | 0.41 Add | 0.85(0.68-1.06) | 1.49E-01 | 9.95E-01 |
| rs2653348  | 6 HCRTR2 | 0.35 Add | 1.03(0.81-1.31) | 8.31E-01 | 9.95E-01 |
| rs2653346  | 6 HCRTR2 | 0.45 Add | 0.85(0.68-1.06) | 1.50E-01 | 9.95E-01 |
| rs7767642  | 6 HCRTR2 | 0.19 Add | 1.23(0.93-1.64) | 1.52E-01 | 9.96E-01 |
| rs12663056 | 6 HCRTR2 | 0.25 Add | 1.2(0.93-1.55)  | 1.61E-01 | 9.96E-01 |
| rs7756097  | 6 HCRTR2 | 0.19 Add | 1.22(0.92-1.62) | 1.62E-01 | 9.96E-01 |
| rs3134708  | 6 HCRTR2 | 0.29 Dom | 1.18(0.86-1.63) | 3.10E-01 | 9.96E-01 |
| rs3122155  | 6 HCRTR2 | 0.43 Add | 0.85(0.68-1.07) | 1.59E-01 | 9.96E-01 |

|            |          |          |                 |          |          |
|------------|----------|----------|-----------------|----------|----------|
| rs4364482  | 6 HCRTR2 | 0.45 Dom | 0.79(0.56-1.1)  | 1.59E-01 | 9.96E-01 |
| rs3134696  | 6 HCRTR2 | 0.25 Dom | 1.18(0.86-1.63) | 3.00E-01 | 9.96E-01 |
| rs2653354  | 6 HCRTR2 | 0.49 Add | 0.87(0.69-1.09) | 2.22E-01 | 9.96E-01 |
| rs2653353  | 6 HCRTR2 | 0.49 Add | 0.87(0.69-1.09) | 2.22E-01 | 9.96E-01 |
| rs2811228  | 6 HCRTR2 | 0.49 Add | 0.87(0.69-1.09) | 2.22E-01 | 9.96E-01 |
| rs2653352  | 6 HCRTR2 | 0.49 Add | 0.87(0.69-1.09) | 2.22E-01 | 9.96E-01 |
| rs6922310  | 6 HCRTR2 | 0.29 Dom | 1.18(0.86-1.62) | 3.16E-01 | 9.96E-01 |
| rs3122153  | 6 HCRTR2 | 0.29 Dom | 1.18(0.85-1.62) | 3.19E-01 | 9.96E-01 |
| rs2653349  | 6 HCRTR2 | 0.07 Add | 0.77(0.46-1.27) | 3.01E-01 | 9.96E-01 |
| rs2653344  | 6 HCRTR2 | 0.07 Add | 0.77(0.46-1.27) | 3.01E-01 | 9.96E-01 |
| rs2653347  | 6 HCRTR2 | 0.07 Add | 0.77(0.46-1.27) | 3.01E-01 | 9.96E-01 |
| rs9464203  | 6 HCRTR2 | 0.02 Add | 0.67(0.27-1.65) | 3.80E-01 | 9.96E-01 |
| rs2653357  | 6 HCRTR2 | 0.49 Add | 0.87(0.69-1.09) | 2.30E-01 | 9.97E-01 |
| rs2653359  | 6 HCRTR2 | 0.49 Add | 0.87(0.69-1.09) | 2.30E-01 | 9.97E-01 |
| rs2811233  | 6 HCRTR2 | 0.49 Add | 0.87(0.69-1.09) | 2.30E-01 | 9.97E-01 |
| rs2811232  | 6 HCRTR2 | 0.49 Add | 0.87(0.69-1.09) | 2.30E-01 | 9.97E-01 |
| rs2811231  | 6 HCRTR2 | 0.49 Add | 0.87(0.69-1.09) | 2.30E-01 | 9.97E-01 |
| rs13343017 | 6 HCRTR2 | 0.29 Rec | 1.3(0.74-2.26)  | 3.60E-01 | 9.97E-01 |
| rs3122149  | 6 HCRTR2 | 0.29 Rec | 1.3(0.74-2.26)  | 3.60E-01 | 9.97E-01 |
| rs10498802 | 6 HCRTR2 | 0.28 Add | 1.11(0.86-1.43) | 4.15E-01 | 9.97E-01 |
| rs4431422  | 6 HCRTR2 | 0.19 Add | 1.22(0.91-1.62) | 1.80E-01 | 9.97E-01 |
| rs7771743  | 6 HCRTR2 | 0.19 Add | 1.22(0.91-1.62) | 1.80E-01 | 9.97E-01 |
| rs2653343  | 6 HCRTR2 | 0.06 Add | 0.8(0.48-1.34)  | 4.05E-01 | 9.97E-01 |
| rs7738215  | 6 HCRTR2 | 0.38 Rec | 1.31(0.85-2)    | 2.19E-01 | 9.97E-01 |
| rs4712099  | 6 HCRTR2 | 0.30 Rec | 1.42(0.85-2.36) | 1.81E-01 | 9.97E-01 |
| rs9475195  | 6 HCRTR2 | 0.39 Rec | 0.81(0.52-1.27) | 3.67E-01 | 9.97E-01 |
| rs9357845  | 6 HCRTR2 | 0.19 Add | 1.2(0.9-1.59)   | 2.10E-01 | 9.98E-01 |
| rs4142972  | 6 HCRTR2 | 0.31 Rec | 1.34(0.81-2.23) | 2.57E-01 | 9.98E-01 |
| rs3800539  | 6 HCRTR2 | 0.28 Add | 1.1(0.86-1.42)  | 4.37E-01 | 9.98E-01 |
| rs9367629  | 6 HCRTR2 | 0.28 Add | 1.1(0.86-1.42)  | 4.37E-01 | 9.98E-01 |
| rs3122154  | 6 HCRTR2 | 0.02 Add | 0.75(0.3-1.89)  | 5.45E-01 | 9.98E-01 |
| rs9382464  | 6 HCRTR2 | 0.25 Add | 1.17(0.91-1.51) | 2.27E-01 | 9.98E-01 |
| rs2653351  | 6 HCRTR2 | 0.42 Add | 1.1(0.87-1.39)  | 4.42E-01 | 9.98E-01 |
| rs2653350  | 6 HCRTR2 | 0.42 Add | 1.1(0.87-1.39)  | 4.42E-01 | 9.98E-01 |
| rs2134294  | 6 HCRTR2 | 0.37 Dom | 0.89(0.64-1.23) | 4.62E-01 | 9.98E-01 |
| rs3122163  | 6 HCRTR2 | 0.06 Dom | 0.85(0.51-1.43) | 5.47E-01 | 9.98E-01 |
| rs9367622  | 6 HCRTR2 | 0.28 Rec | 1.21(0.68-2.16) | 5.10E-01 | 9.98E-01 |

|            |          |          |                 |          |          |
|------------|----------|----------|-----------------|----------|----------|
| rs3134707  | 6 HCRTR2 | 0.02 Add | 0.76(0.3-1.92)  | 5.68E-01 | 9.98E-01 |
| rs2653355  | 6 HCRTR2 | 0.13 Dom | 0.93(0.64-1.37) | 7.27E-01 | 9.98E-01 |
| rs9396060  | 6 HCRTR2 | 0.28 Dom | 1.13(0.82-1.55) | 4.61E-01 | 9.98E-01 |
| rs12662510 | 6 HCRTR2 | 0.28 Dom | 1.13(0.82-1.55) | 4.61E-01 | 9.98E-01 |
| rs11751491 | 6 HCRTR2 | 0.06 Dom | 0.91(0.54-1.53) | 7.15E-01 | 9.99E-01 |
| rs12527963 | 6 HCRTR2 | 0.19 Rec | 0.71(0.28-1.8)  | 4.69E-01 | 9.99E-01 |
| rs13436914 | 5 HTR1A  | 0.05 Add | 1.59(1-2.55)    | 5.07E-02 | 1.92E-01 |
| rs6295     | 5 HTR1A  | 0.25 Add | 1.12(0.86-1.45) | 4.09E-01 | 7.91E-01 |
| rs10085024 | 5 HTR1A  | 0.20 Dom | 0.98(0.7-1.37)  | 8.98E-01 | 8.98E-01 |
| rs1549274  | 5 HTR1A  | 0.20 Dom | 0.98(0.7-1.37)  | 8.98E-01 | 8.98E-01 |
| rs2161615  | 5 HTR1A  | 0.20 Dom | 0.98(0.7-1.37)  | 8.98E-01 | 8.98E-01 |
| rs4521432  | 5 HTR1A  | 0.20 Dom | 0.98(0.7-1.37)  | 8.98E-01 | 8.98E-01 |
| rs6859392  | 5 HTR1A  | 0.20 Dom | 0.98(0.7-1.37)  | 8.98E-01 | 8.98E-01 |
| rs13361335 | 5 HTR1A  | 0.40 Add | 0.93(0.74-1.17) | 5.36E-01 | 9.12E-01 |
| rs1364043  | 5 HTR1A  | 0.40 Add | 0.93(0.74-1.17) | 5.36E-01 | 9.12E-01 |
| rs6878612  | 5 HTR1A  | 0.20 Dom | 0.98(0.7-1.36)  | 8.87E-01 | 9.15E-01 |
| rs12653018 | 5 HTR1A  | 0.20 Dom | 0.98(0.7-1.36)  | 8.87E-01 | 9.15E-01 |
| rs878567   | 5 HTR1A  | 0.20 Dom | 0.98(0.7-1.36)  | 8.87E-01 | 9.15E-01 |
| rs1423691  | 5 HTR1A  | 0.20 Dom | 0.98(0.7-1.36)  | 8.87E-01 | 9.15E-01 |
| rs6449693  | 5 HTR1A  | 0.20 Dom | 0.98(0.7-1.36)  | 8.87E-01 | 9.15E-01 |
| rs10042486 | 5 HTR1A  | 0.20 Dom | 0.98(0.7-1.36)  | 8.87E-01 | 9.15E-01 |
| rs1936158  | 6 HTR1B  | 0.30 Dom | 0.65(0.47-0.9)  | 9.23E-03 | 3.10E-01 |
| rs1213368  | 6 HTR1B  | 0.40 Dom | 0.66(0.47-0.91) | 1.19E-02 | 3.89E-01 |
| rs1213369  | 6 HTR1B  | 0.26 Dom | 0.68(0.49-0.95) | 2.25E-02 | 5.46E-01 |
| rs130058   | 6 HTR1B  | 0.10 Add | 0.67(0.44-1.02) | 6.36E-02 | 5.98E-01 |
| rs2226183  | 6 HTR1B  | 0.04 Add | 1.75(1.01-3.01) | 4.43E-02 | 6.03E-01 |
| rs2000292  | 6 HTR1B  | 0.48 Rec | 1.51(1.05-2.18) | 2.53E-02 | 6.12E-01 |
| rs1145831  | 6 HTR1B  | 0.13 Rec | 3.21(1.18-8.72) | 2.19E-02 | 6.14E-01 |
| rs12173930 | 6 HTR1B  | 0.15 Dom | 0.67(0.46-0.98) | 3.68E-02 | 6.16E-01 |
| rs4543330  | 6 HTR1B  | 0.03 Add | 1.75(1-3.05)    | 4.98E-02 | 6.30E-01 |
| rs6298     | 6 HTR1B  | 0.50 Dom | 0.69(0.48-0.99) | 4.17E-02 | 7.10E-01 |
| rs13192352 | 6 HTR1B  | 0.50 Dom | 0.69(0.48-0.99) | 4.17E-02 | 7.11E-01 |
| rs6296     | 6 HTR1B  | 0.50 Dom | 0.69(0.48-0.99) | 4.45E-02 | 7.31E-01 |
| rs12662392 | 6 HTR1B  | 0.49 Rec | 1.43(1-2.06)    | 5.02E-02 | 7.67E-01 |
| rs10806098 | 6 HTR1B  | 0.49 Dom | 0.71(0.5-1.02)  | 6.59E-02 | 8.42E-01 |
| rs6297     | 6 HTR1B  | 0.12 Dom | 0.71(0.47-1.06) | 9.63E-02 | 8.90E-01 |
| rs4140535  | 6 HTR1B  | 0.36 Dom | 0.75(0.54-1.04) | 8.53E-02 | 8.91E-01 |

|            |         |          |                 |          |          |
|------------|---------|----------|-----------------|----------|----------|
| rs6908090  | 6 HTR1B | 0.05 Dom | 1.05(0.62-1.77) | 8.53E-01 | 8.96E-01 |
| rs9352483  | 6 HTR1B | 0.05 Dom | 1.05(0.62-1.77) | 8.53E-01 | 8.96E-01 |
| rs1778258  | 6 HTR1B | 0.12 Dom | 0.72(0.48-1.08) | 1.13E-01 | 9.26E-01 |
| rs1228814  | 6 HTR1B | 0.19 Dom | 0.97(0.69-1.35) | 8.53E-01 | 9.78E-01 |
| rs9359271  | 6 HTR1B | 0.49 Rec | 0.77(0.54-1.11) | 1.67E-01 | 9.78E-01 |
| rs10943458 | 6 HTR1B | 0.09 Add | 1.21(0.83-1.76) | 3.14E-01 | 9.89E-01 |
| rs2211488  | 6 HTR1B | 0.09 Add | 1.21(0.83-1.76) | 3.14E-01 | 9.89E-01 |
| rs12203487 | 6 HTR1B | 0.09 Add | 1.21(0.83-1.76) | 3.14E-01 | 9.89E-01 |
| rs1343485  | 6 HTR1B | 0.06 Dom | 1.08(0.67-1.74) | 7.65E-01 | 9.91E-01 |
| rs1213366  | 6 HTR1B | 0.14 Dom | 0.88(0.61-1.27) | 5.05E-01 | 9.96E-01 |
| rs1213371  | 6 HTR1B | 0.14 Dom | 0.89(0.62-1.29) | 5.32E-01 | 9.97E-01 |
| rs1213373  | 6 HTR1B | 0.14 Dom | 0.89(0.62-1.29) | 5.32E-01 | 9.97E-01 |
| rs13212041 | 6 HTR1B | 0.23 Dom | 0.89(0.64-1.24) | 5.01E-01 | 9.97E-01 |
| rs13218546 | 6 HTR1B | 0.14 Add | 0.96(0.69-1.32) | 7.82E-01 | 9.98E-01 |
| rs12527143 | 6 HTR1B | 0.10 Add | 1.16(0.8-1.67)  | 4.39E-01 | 9.98E-01 |
| rs2798949  | 6 HTR1B | 0.10 Rec | 0.35(0.04-2.92) | 3.34E-01 | 9.99E-01 |
| rs11568817 | 6 HTR1B | 0.14 Add | 0.91(0.65-1.28) | 5.89E-01 | 9.99E-01 |
| rs1213370  | 6 HTR1B | 0.28 Rec | 0.85(0.44-1.61) | 6.10E-01 | 9.99E-01 |
| rs2143823  | 6 HTR1B | 0.23 Add | 0.92(0.7-1.22)  | 5.62E-01 | 9.99E-01 |
| rs17273700 | 6 HTR1B | 0.13 Add | 0.91(0.65-1.29) | 6.10E-01 | 9.99E-01 |
| rs9361235  | 6 HTR1B | 0.13 Add | 0.91(0.65-1.29) | 6.10E-01 | 9.99E-01 |
| rs9361233  | 6 HTR1B | 0.13 Add | 0.91(0.65-1.29) | 6.10E-01 | 9.99E-01 |
| rs1343491  | 6 HTR1B | 0.15 Dom | 0.93(0.64-1.33) | 6.76E-01 | 9.99E-01 |
| rs9350712  | 6 HTR1B | 0.46 Dom | 1.09(0.76-1.55) | 6.35E-01 | 9.99E-01 |
| rs9352481  | 6 HTR1B | 0.46 Dom | 1.09(0.76-1.55) | 6.35E-01 | 9.99E-01 |
| rs1213365  | 6 HTR1B | 0.28 Rec | 0.89(0.47-1.71) | 7.36E-01 | 1.00E+00 |
| rs1186675  | 1 KCNJ9 | 0.05 Add | 1.72(1.08-2.75) | 2.34E-02 | 1.87E-01 |
| rs3180694  | 1 KCNJ9 | 0.05 Add | 1.6(0.99-2.58)  | 5.25E-02 | 3.34E-01 |
| rs3747619  | 1 KCNJ9 | 0.05 Add | 1.54(0.97-2.45) | 6.83E-02 | 3.93E-01 |
| rs1131891  | 1 KCNJ9 | 0.05 Add | 1.54(0.97-2.45) | 6.83E-02 | 3.93E-01 |
| rs12402888 | 1 KCNJ9 | 0.05 Add | 1.54(0.97-2.45) | 6.83E-02 | 3.93E-01 |
| rs12401728 | 1 KCNJ9 | 0.23 Dom | 0.79(0.56-1.1)  | 1.57E-01 | 8.37E-01 |
| rs2369406  | 1 KCNJ9 | 0.50 Dom | 0.77(0.54-1.1)  | 1.53E-01 | 8.37E-01 |
| rs4656874  | 1 KCNJ9 | 0.22 Add | 0.87(0.66-1.14) | 3.11E-01 | 8.43E-01 |
| rs1321649  | 1 KCNJ9 | 0.27 Rec | 0.87(0.48-1.56) | 6.32E-01 | 8.60E-01 |
| rs2295621  | 1 KCNJ9 | 0.23 Dom | 0.8(0.57-1.11)  | 1.86E-01 | 8.63E-01 |
| rs6677510  | 1 KCNJ9 | 0.27 Rec | 0.86(0.48-1.54) | 6.09E-01 | 8.74E-01 |

|            |    |           |      |     |                 |          |          |
|------------|----|-----------|------|-----|-----------------|----------|----------|
| rs4656876  | 1  | KCNJ9     | 0.27 | Rec | 0.86(0.48-1.54) | 6.09E-01 | 8.74E-01 |
| rs12408242 | 1  | KCNJ9     | 0.22 | Dom | 0.81(0.58-1.13) | 2.09E-01 | 8.95E-01 |
| rs2737703  | 1  | KCNJ9     | 0.28 | Add | 0.9(0.7-1.16)   | 4.02E-01 | 9.10E-01 |
| rs2753268  | 1  | KCNJ9     | 0.27 | Rec | 0.81(0.43-1.5)  | 4.97E-01 | 9.34E-01 |
| rs2494211  | 1  | KCNJ9     | 0.28 | Rec | 0.77(0.41-1.43) | 4.06E-01 | 9.56E-01 |
| rs11265320 | 1  | KCNJ9     | 0.32 | Dom | 1.14(0.83-1.58) | 4.14E-01 | 9.56E-01 |
| rs11265318 | 1  | KCNJ9     | 0.28 | Rec | 0.77(0.41-1.43) | 3.99E-01 | 9.60E-01 |
| rs10401329 | 19 | KLF16     | 0.28 | Dom | 1.58(1.15-2.18) | 5.30E-03 | 5.04E-02 |
| rs4806814  | 19 | KLF16     | 0.30 | Dom | 1.4(1.01-1.94)  | 4.03E-02 | 2.67E-01 |
| rs4806815  | 19 | KLF16     | 0.30 | Dom | 1.4(1.01-1.93)  | 4.10E-02 | 2.69E-01 |
| rs893541   | 19 | KLF16     | 0.31 | Dom | 1.38(0.99-1.9)  | 5.37E-02 | 2.72E-01 |
| rs4807154  | 19 | KLF16     | 0.30 | Dom | 1.38(1-1.9)     | 5.22E-02 | 2.76E-01 |
| rs3810417  | 19 | KLF16     | 0.30 | Dom | 1.39(1.01-1.92) | 4.62E-02 | 2.91E-01 |
| rs4807152  | 19 | KLF16     | 0.42 | Dom | 1.36(0.95-1.94) | 9.10E-02 | 3.32E-01 |
| rs12460105 | 19 | KLF16     | 0.42 | Dom | 1.36(0.95-1.94) | 9.10E-02 | 3.32E-01 |
| rs1609761  | 19 | KLF16     | 0.42 | Dom | 1.31(0.92-1.86) | 1.33E-01 | 4.34E-01 |
| rs893539   | 19 | KLF16     | 0.22 | Add | 0.95(0.72-1.24) | 6.88E-01 | 7.27E-01 |
| rs893540   | 19 | KLF16     | 0.22 | Add | 0.95(0.72-1.24) | 6.88E-01 | 7.27E-01 |
| rs1609760  | 19 | KLF16     | 0.23 | Add | 0.97(0.74-1.27) | 8.09E-01 | 8.09E-01 |
| rs2205718  | X  | MAOA_MAOB | 0.41 | Rec | 0.62(0.39-0.99) | 4.48E-02 | 5.73E-01 |
| rs2072743  | X  | MAOA_MAOB | 0.41 | Rec | 0.62(0.39-0.99) | 4.54E-02 | 5.77E-01 |
| rs909525   | X  | MAOA_MAOB | 0.40 | Rec | 0.61(0.38-0.99) | 4.63E-02 | 5.81E-01 |
| rs5906957  | X  | MAOA_MAOB | 0.40 | Rec | 0.61(0.38-0.99) | 4.66E-02 | 5.83E-01 |
| rs979606   | X  | MAOA_MAOB | 0.40 | Rec | 0.62(0.39-0.99) | 4.66E-02 | 5.85E-01 |
| rs5906883  | X  | MAOA_MAOB | 0.40 | Rec | 0.61(0.38-0.99) | 4.76E-02 | 5.86E-01 |
| rs2283725  | X  | MAOA_MAOB | 0.40 | Rec | 0.61(0.38-1)    | 4.81E-02 | 5.90E-01 |
| rs3788862  | X  | MAOA_MAOB | 0.40 | Rec | 0.61(0.38-1)    | 4.81E-02 | 5.90E-01 |
| rs1465108  | X  | MAOA_MAOB | 0.40 | Rec | 0.61(0.38-1)    | 4.81E-02 | 5.90E-01 |
| rs4824657  | X  | MAOA_MAOB | 0.41 | Rec | 0.62(0.38-1.01) | 5.36E-02 | 6.26E-01 |
| rs736944   | X  | MAOA_MAOB | 0.16 | Rec | 0.21(0.03-1.61) | 1.33E-01 | 7.13E-01 |
| rs7888450  | X  | MAOA_MAOB | 0.10 | Add | 1.31(0.91-1.89) | 1.46E-01 | 7.49E-01 |
| rs2064070  | X  | MAOA_MAOB | 0.40 | Rec | 0.66(0.41-1.05) | 8.13E-02 | 7.60E-01 |
| rs1799836  | X  | MAOA_MAOB | 0.19 | Rec | 0.39(0.11-1.35) | 1.36E-01 | 8.32E-01 |
| rs3027431  | X  | MAOA_MAOB | 0.15 | Dom | 1.33(0.94-1.89) | 1.07E-01 | 8.44E-01 |
| rs3027416  | X  | MAOA_MAOB | 0.18 | Add | 1.26(0.94-1.68) | 1.26E-01 | 8.52E-01 |
| rs1040398  | X  | MAOA_MAOB | 0.15 | Dom | 1.32(0.93-1.88) | 1.14E-01 | 8.57E-01 |
| rs12558036 | X  | MAOA_MAOB | 0.15 | Dom | 1.32(0.93-1.88) | 1.14E-01 | 8.57E-01 |

|            |    |           |      |     |                 |          |          |
|------------|----|-----------|------|-----|-----------------|----------|----------|
| rs17310637 | X  | MAOA_MAOB | 0.11 | Dom | 1.31(0.89-1.95) | 1.73E-01 | 9.03E-01 |
| rs5952352  | X  | MAOA_MAOB | 0.10 | Dom | 1.28(0.86-1.91) | 2.22E-01 | 9.11E-01 |
| rs6651806  | X  | MAOA_MAOB | 0.13 | Add | 1.16(0.84-1.6)  | 3.59E-01 | 9.14E-01 |
| rs5905449  | X  | MAOA_MAOB | 0.03 | Add | 1.06(0.53-2.1)  | 8.75E-01 | 9.16E-01 |
| rs5905613  | X  | MAOA_MAOB | 0.49 | Rec | 1.21(0.84-1.74) | 3.14E-01 | 9.19E-01 |
| rs5952813  | X  | MAOA_MAOB | 0.11 | Dom | 1.26(0.85-1.87) | 2.50E-01 | 9.22E-01 |
| rs4824562  | X  | MAOA_MAOB | 0.16 | Rec | 0.39(0.09-1.76) | 2.20E-01 | 9.26E-01 |
| rs6609257  | X  | MAOA_MAOB | 0.38 | Rec | 0.74(0.46-1.2)  | 2.24E-01 | 9.33E-01 |
| rs10521432 | X  | MAOA_MAOB | 0.12 | Add | 1.24(0.89-1.74) | 2.03E-01 | 9.35E-01 |
| rs5952799  | X  | MAOA_MAOB | 0.16 | Rec | 0.39(0.09-1.74) | 2.16E-01 | 9.37E-01 |
| rs3027421  | X  | MAOA_MAOB | 0.17 | Add | 1.23(0.92-1.65) | 1.65E-01 | 9.37E-01 |
| rs3027415  | X  | MAOA_MAOB | 0.02 | Dom | 0.9(0.4-2.02)   | 7.99E-01 | 9.51E-01 |
| rs17146716 | X  | MAOA_MAOB | 0.11 | Add | 1.19(0.84-1.69) | 3.28E-01 | 9.55E-01 |
| rs5952330  | X  | MAOA_MAOB | 0.11 | Add | 1.21(0.85-1.72) | 2.99E-01 | 9.56E-01 |
| rs5905512  | X  | MAOA_MAOB | 0.28 | Add | 1.06(0.82-1.36) | 6.75E-01 | 9.79E-01 |
| rs2298432  | 22 | MAPK1     | 0.47 | Add | 1.26(1-1.57)    | 4.68E-02 | 5.78E-01 |
| rs7290469  | 22 | MAPK1     | 0.20 | Add | 1.23(0.93-1.62) | 1.42E-01 | 8.01E-01 |
| rs5999752  | 22 | MAPK1     | 0.20 | Add | 1.22(0.92-1.61) | 1.63E-01 | 8.43E-01 |
| rs2283791  | 22 | MAPK1     | 0.20 | Add | 1.22(0.92-1.61) | 1.66E-01 | 8.48E-01 |
| rs9610338  | 22 | MAPK1     | 0.20 | Add | 1.22(0.92-1.61) | 1.66E-01 | 8.48E-01 |
| rs9607285  | 22 | MAPK1     | 0.20 | Add | 1.22(0.92-1.61) | 1.68E-01 | 8.51E-01 |
| rs9607298  | 22 | MAPK1     | 0.20 | Add | 1.21(0.92-1.6)  | 1.75E-01 | 8.63E-01 |
| rs9610374  | 22 | MAPK1     | 0.20 | Add | 1.21(0.92-1.6)  | 1.75E-01 | 8.63E-01 |
| rs2283793  | 22 | MAPK1     | 0.20 | Add | 1.21(0.92-1.6)  | 1.75E-01 | 8.63E-01 |
| rs5999749  | 22 | MAPK1     | 0.20 | Add | 1.21(0.92-1.6)  | 1.75E-01 | 8.63E-01 |
| rs2266969  | 22 | MAPK1     | 0.20 | Add | 1.21(0.92-1.6)  | 1.80E-01 | 8.70E-01 |
| rs5999550  | 22 | MAPK1     | 0.43 | Add | 1.18(0.94-1.48) | 1.45E-01 | 9.17E-01 |
| rs9607287  | 22 | MAPK1     | 0.44 | Add | 1.18(0.94-1.48) | 1.46E-01 | 9.19E-01 |
| rs5749986  | 22 | MAPK1     | 0.44 | Add | 1.18(0.94-1.48) | 1.46E-01 | 9.19E-01 |
| rs3788332  | 22 | MAPK1     | 0.44 | Add | 1.18(0.94-1.48) | 1.48E-01 | 9.21E-01 |
| rs2283795  | 22 | MAPK1     | 0.19 | Rec | 0.96(0.4-2.3)   | 9.32E-01 | 9.32E-01 |
| rs5749998  | 22 | MAPK1     | 0.43 | Add | 1.18(0.94-1.48) | 1.56E-01 | 9.32E-01 |
| rs2266967  | 22 | MAPK1     | 0.43 | Add | 1.18(0.94-1.48) | 1.56E-01 | 9.32E-01 |
| rs9340     | 22 | MAPK1     | 0.20 | Dom | 1.2(0.86-1.67)  | 2.92E-01 | 9.32E-01 |
| rs2266966  | 22 | MAPK1     | 0.20 | Dom | 1.2(0.86-1.67)  | 2.92E-01 | 9.32E-01 |
| rs1063311  | 22 | MAPK1     | 0.20 | Add | 1.22(0.92-1.61) | 1.62E-01 | 9.40E-01 |
| rs6928     | 22 | MAPK1     | 0.43 | Dom | 1.19(0.84-1.67) | 3.22E-01 | 9.45E-01 |

|            |          |          |                 |          |          |
|------------|----------|----------|-----------------|----------|----------|
| rs9607272  | 22 MAPK1 | 0.10 Dom | 1.32(0.89-1.95) | 1.67E-01 | 9.45E-01 |
| rs3810609  | 22 MAPK1 | 0.43 Dom | 1.19(0.84-1.67) | 3.22E-01 | 9.45E-01 |
| rs13943    | 22 MAPK1 | 0.43 Dom | 1.19(0.84-1.67) | 3.22E-01 | 9.45E-01 |
| rs3810610  | 22 MAPK1 | 0.43 Dom | 1.19(0.84-1.67) | 3.22E-01 | 9.45E-01 |
| rs5755099  | 22 MAPK1 | 0.42 Add | 1.16(0.92-1.45) | 2.07E-01 | 9.61E-01 |
| rs5999521  | 22 MAPK1 | 0.42 Add | 1.15(0.92-1.45) | 2.10E-01 | 9.63E-01 |
| rs2283792  | 22 MAPK1 | 0.42 Add | 1.15(0.92-1.45) | 2.10E-01 | 9.63E-01 |
| rs2876981  | 22 MAPK1 | 0.10 Dom | 1.3(0.88-1.92)  | 1.90E-01 | 9.63E-01 |
| rs9610470  | 22 MAPK1 | 0.10 Dom | 1.3(0.88-1.92)  | 1.90E-01 | 9.63E-01 |
| rs2006893  | 22 MAPK1 | 0.42 Add | 1.15(0.92-1.45) | 2.10E-01 | 9.63E-01 |
| rs5999515  | 22 MAPK1 | 0.42 Add | 1.15(0.92-1.45) | 2.10E-01 | 9.63E-01 |
| rs11704205 | 22 MAPK1 | 0.42 Add | 1.15(0.92-1.45) | 2.10E-01 | 9.63E-01 |
| rs2283794  | 22 MAPK1 | 0.43 Rec | 1.28(0.86-1.9)  | 2.28E-01 | 9.67E-01 |
| rs1892846  | 22 MAPK1 | 0.43 Dom | 1.16(0.82-1.63) | 3.99E-01 | 9.67E-01 |
| rs1892848  | 22 MAPK1 | 0.43 Dom | 1.16(0.82-1.63) | 3.99E-01 | 9.67E-01 |
| rs9610375  | 22 MAPK1 | 0.23 Add | 1.17(0.9-1.52)  | 2.51E-01 | 9.69E-01 |
| rs8136867  | 22 MAPK1 | 0.43 Dom | 1.15(0.82-1.61) | 4.26E-01 | 9.71E-01 |
| rs5755694  | 22 MAPK1 | 0.43 Rec | 1.27(0.85-1.9)  | 2.37E-01 | 9.71E-01 |
| rs17759568 | 22 MAPK1 | 0.10 Dom | 1.18(0.78-1.77) | 4.30E-01 | 9.79E-01 |
| rs11913240 | 22 MAPK1 | 0.10 Dom | 1.18(0.78-1.77) | 4.30E-01 | 9.79E-01 |
| rs5755040  | 22 MAPK1 | 0.20 Dom | 1.1(0.79-1.53)  | 5.83E-01 | 9.85E-01 |
| rs2276006  | 22 MAPK1 | 0.20 Dom | 1.1(0.79-1.53)  | 5.83E-01 | 9.85E-01 |
| rs5749811  | 22 MAPK1 | 0.20 Dom | 1.1(0.79-1.53)  | 5.83E-01 | 9.85E-01 |
| rs5754968  | 22 MAPK1 | 0.20 Dom | 1.1(0.79-1.53)  | 5.83E-01 | 9.85E-01 |
| rs13515    | 22 MAPK1 | 0.20 Dom | 1.1(0.79-1.53)  | 5.83E-01 | 9.85E-01 |
| rs5754970  | 22 MAPK1 | 0.20 Dom | 1.09(0.79-1.52) | 5.95E-01 | 9.86E-01 |
| rs2276005  | 22 MAPK1 | 0.20 Dom | 1.1(0.79-1.53)  | 5.88E-01 | 9.86E-01 |
| rs5755745  | 22 MAPK1 | 0.19 Dom | 1.07(0.76-1.49) | 7.04E-01 | 9.92E-01 |
| rs4821367  | 22 MAPK1 | 0.19 Dom | 1.08(0.77-1.5)  | 6.67E-01 | 9.94E-01 |
| rs5749939  | 22 MAPK1 | 0.19 Dom | 1.08(0.77-1.5)  | 6.67E-01 | 9.94E-01 |
| rs4821401  | 22 MAPK1 | 0.19 Dom | 1.08(0.77-1.5)  | 6.67E-01 | 9.94E-01 |
| rs4821263  | 22 MAPK1 | 0.19 Dom | 1.08(0.77-1.5)  | 6.67E-01 | 9.94E-01 |
| rs4821371  | 22 MAPK1 | 0.20 Dom | 1.07(0.77-1.5)  | 6.77E-01 | 9.94E-01 |
| rs3827303  | 22 MAPK1 | 0.20 Dom | 1.07(0.77-1.5)  | 6.77E-01 | 9.94E-01 |
| rs5755074  | 22 MAPK1 | 0.13 Add | 0.92(0.66-1.3)  | 6.53E-01 | 9.96E-01 |
| rs2298434  | 22 MAPK1 | 0.21 Dom | 1.11(0.8-1.55)  | 5.19E-01 | 9.96E-01 |
| rs1892847  | 22 MAPK1 | 0.03 Add | 0.91(0.48-1.72) | 7.66E-01 | 9.96E-01 |



|            |          |          |                 |          |          |
|------------|----------|----------|-----------------|----------|----------|
| rs3729910  | 22 MAPK1 | 0.03 Add | 0.91(0.48-1.72) | 7.66E-01 | 9.96E-01 |
| rs7285387  | 22 MAPK1 | 0.03 Add | 0.91(0.48-1.72) | 7.66E-01 | 9.96E-01 |
| rs7286558  | 22 MAPK1 | 0.03 Add | 0.91(0.48-1.72) | 7.66E-01 | 9.96E-01 |
| rs17821423 | 22 MAPK1 | 0.03 Add | 0.91(0.48-1.73) | 7.80E-01 | 9.97E-01 |
| rs13058    | 22 MAPK1 | 0.03 Add | 0.91(0.48-1.73) | 7.80E-01 | 9.97E-01 |
| rs2266968  | 22 MAPK1 | 0.21 Dom | 1.11(0.8-1.54)  | 5.36E-01 | 9.97E-01 |
| rs9610355  | 22 MAPK1 | 0.21 Dom | 1.11(0.8-1.54)  | 5.41E-01 | 9.97E-01 |
| rs743409   | 22 MAPK1 | 0.45 Rec | 1.14(0.77-1.67) | 5.18E-01 | 9.99E-01 |
| rs12054220 | 3 NCK1   | 0.09 Dom | 0.51(0.31-0.85) | 9.93E-03 | 3.85E-02 |
| rs4678275  | 3 NCK1   | 0.08 Add | 0.53(0.32-0.87) | 1.29E-02 | 4.69E-02 |
| rs16844241 | 3 NCK1   | 0.08 Add | 0.53(0.32-0.87) | 1.29E-02 | 4.69E-02 |
| rs12629000 | 3 NCK1   | 0.08 Add | 0.53(0.32-0.87) | 1.29E-02 | 4.69E-02 |
| rs9845460  | 3 NCK1   | 0.08 Add | 0.53(0.32-0.87) | 1.25E-02 | 5.48E-02 |
| rs9824147  | 3 NCK1   | 0.12 Dom | 0.55(0.36-0.85) | 6.12E-03 | 5.48E-02 |
| rs835637   | 3 NCK1   | 0.09 Add | 0.55(0.33-0.9)  | 1.66E-02 | 6.02E-02 |
| rs7648198  | 3 NCK1   | 0.08 Add | 0.55(0.34-0.91) | 1.88E-02 | 6.83E-02 |
| rs835636   | 3 NCK1   | 0.09 Add | 0.57(0.35-0.93) | 2.48E-02 | 9.06E-02 |
| rs1048145  | 3 NCK1   | 0.04 Add | 1.49(0.89-2.5)  | 1.25E-01 | 4.38E-01 |
| rs17301365 | 3 NCK1   | 0.04 Add | 1.49(0.89-2.5)  | 1.25E-01 | 4.38E-01 |
| rs835648   | 3 NCK1   | 0.13 Dom | 0.74(0.5-1.1)   | 1.43E-01 | 5.56E-01 |
| rs2343662  | 3 NCK1   | 0.13 Dom | 0.77(0.51-1.14) | 1.89E-01 | 6.35E-01 |
| rs1805300  | 3 NCK1   | 0.13 Dom | 0.77(0.52-1.15) | 2.00E-01 | 6.50E-01 |
| rs4678448  | 3 NCK1   | 0.13 Dom | 0.77(0.52-1.15) | 2.00E-01 | 6.50E-01 |
| rs9881139  | 3 NCK1   | 0.13 Add | 0.79(0.55-1.13) | 1.92E-01 | 6.54E-01 |
| rs6761993  | 3 NCK1   | 0.13 Dom | 0.79(0.53-1.17) | 2.38E-01 | 6.56E-01 |
| rs9855314  | 3 NCK1   | 0.13 Dom | 0.77(0.52-1.15) | 2.05E-01 | 6.57E-01 |
| rs1052618  | 3 NCK1   | 0.13 Dom | 0.77(0.52-1.15) | 2.05E-01 | 6.57E-01 |
| rs6439672  | 3 NCK1   | 0.13 Dom | 0.77(0.52-1.15) | 2.05E-01 | 6.57E-01 |
| rs9846691  | 3 NCK1   | 0.13 Dom | 0.77(0.52-1.15) | 2.05E-01 | 6.57E-01 |
| rs12330283 | 3 NCK1   | 0.13 Dom | 0.77(0.52-1.15) | 2.05E-01 | 6.57E-01 |
| rs9865545  | 3 NCK1   | 0.13 Dom | 0.77(0.52-1.15) | 2.05E-01 | 6.57E-01 |
| rs6803618  | 3 NCK1   | 0.13 Dom | 0.77(0.52-1.15) | 2.05E-01 | 6.57E-01 |
| rs9818792  | 3 NCK1   | 0.13 Dom | 0.77(0.52-1.15) | 2.05E-01 | 6.57E-01 |
| rs9837990  | 3 NCK1   | 0.13 Dom | 0.77(0.52-1.15) | 2.05E-01 | 6.57E-01 |
| rs9827648  | 3 NCK1   | 0.13 Dom | 0.77(0.52-1.15) | 2.05E-01 | 6.57E-01 |
| rs6797509  | 3 NCK1   | 0.13 Dom | 0.77(0.52-1.15) | 2.05E-01 | 6.57E-01 |
| rs9828009  | 3 NCK1   | 0.13 Dom | 0.77(0.52-1.15) | 2.05E-01 | 6.57E-01 |

|            |        |          |                 |          |          |
|------------|--------|----------|-----------------|----------|----------|
| rs1865149  | 3 NCK1 | 0.13 Dom | 0.77(0.52-1.15) | 2.05E-01 | 6.57E-01 |
| rs9859665  | 3 NCK1 | 0.13 Dom | 0.77(0.52-1.15) | 2.05E-01 | 6.57E-01 |
| rs9848867  | 3 NCK1 | 0.13 Dom | 0.77(0.52-1.15) | 2.05E-01 | 6.57E-01 |
| rs9859810  | 3 NCK1 | 0.13 Dom | 0.77(0.52-1.15) | 2.05E-01 | 6.57E-01 |
| rs12487901 | 3 NCK1 | 0.13 Dom | 0.77(0.52-1.15) | 2.05E-01 | 6.57E-01 |
| rs2117009  | 3 NCK1 | 0.13 Dom | 0.77(0.52-1.15) | 2.05E-01 | 6.57E-01 |
| rs7629882  | 3 NCK1 | 0.13 Dom | 0.77(0.52-1.15) | 2.05E-01 | 6.57E-01 |
| rs938525   | 3 NCK1 | 0.13 Dom | 0.77(0.52-1.15) | 2.05E-01 | 6.57E-01 |
| rs12637949 | 3 NCK1 | 0.13 Dom | 0.77(0.52-1.15) | 2.05E-01 | 6.57E-01 |
| rs9878464  | 3 NCK1 | 0.13 Dom | 0.77(0.52-1.15) | 2.05E-01 | 6.57E-01 |
| rs9874887  | 3 NCK1 | 0.13 Dom | 0.77(0.52-1.15) | 2.05E-01 | 6.57E-01 |
| rs9836807  | 3 NCK1 | 0.13 Dom | 0.77(0.52-1.15) | 2.05E-01 | 6.57E-01 |
| rs1347209  | 3 NCK1 | 0.13 Dom | 0.77(0.52-1.15) | 2.05E-01 | 6.57E-01 |
| rs6783508  | 3 NCK1 | 0.13 Dom | 0.77(0.52-1.15) | 2.05E-01 | 6.57E-01 |
| rs6786648  | 3 NCK1 | 0.13 Dom | 0.77(0.52-1.15) | 2.05E-01 | 6.57E-01 |
| rs2031029  | 3 NCK1 | 0.13 Dom | 0.77(0.52-1.15) | 2.05E-01 | 6.57E-01 |
| rs10935210 | 3 NCK1 | 0.13 Dom | 0.77(0.52-1.15) | 2.05E-01 | 6.57E-01 |
| rs7648817  | 3 NCK1 | 0.13 Dom | 0.77(0.52-1.15) | 2.05E-01 | 6.57E-01 |
| rs1433319  | 3 NCK1 | 0.13 Dom | 0.77(0.52-1.15) | 2.09E-01 | 6.61E-01 |
| rs3772388  | 3 NCK1 | 0.13 Dom | 0.77(0.52-1.15) | 2.09E-01 | 6.61E-01 |
| rs6775389  | 3 NCK1 | 0.13 Dom | 0.77(0.52-1.15) | 2.09E-01 | 6.61E-01 |
| rs7611847  | 3 NCK1 | 0.13 Dom | 0.77(0.52-1.15) | 2.09E-01 | 6.61E-01 |
| rs6786302  | 3 NCK1 | 0.13 Dom | 0.77(0.52-1.15) | 2.09E-01 | 6.61E-01 |
| rs1344790  | 3 NCK1 | 0.13 Dom | 0.77(0.52-1.15) | 2.09E-01 | 6.61E-01 |
| rs1433318  | 3 NCK1 | 0.13 Dom | 0.77(0.52-1.15) | 2.09E-01 | 6.61E-01 |
| rs3856623  | 3 NCK1 | 0.13 Dom | 0.77(0.52-1.15) | 2.09E-01 | 6.61E-01 |
| rs3963921  | 3 NCK1 | 0.13 Dom | 0.77(0.52-1.15) | 2.09E-01 | 6.61E-01 |
| rs9289523  | 3 NCK1 | 0.13 Dom | 0.77(0.52-1.15) | 2.09E-01 | 6.61E-01 |
| rs1965109  | 3 NCK1 | 0.13 Dom | 0.77(0.52-1.15) | 2.09E-01 | 6.61E-01 |
| rs3845925  | 3 NCK1 | 0.13 Dom | 0.77(0.52-1.15) | 2.09E-01 | 6.61E-01 |
| rs4678274  | 3 NCK1 | 0.13 Dom | 0.77(0.52-1.15) | 2.09E-01 | 6.61E-01 |
| rs9833952  | 3 NCK1 | 0.13 Dom | 0.77(0.52-1.15) | 2.09E-01 | 6.62E-01 |
| rs6771717  | 3 NCK1 | 0.13 Dom | 0.77(0.52-1.15) | 2.09E-01 | 6.62E-01 |
| rs835647   | 3 NCK1 | 0.13 Dom | 0.78(0.52-1.16) | 2.22E-01 | 6.82E-01 |
| rs835634   | 3 NCK1 | 0.28 Rec | 0.78(0.41-1.49) | 4.51E-01 | 6.89E-01 |
| rs12054219 | 3 NCK1 | 0.28 Rec | 0.78(0.41-1.49) | 4.51E-01 | 6.89E-01 |
| rs12054408 | 3 NCK1 | 0.28 Rec | 0.78(0.41-1.49) | 4.51E-01 | 6.89E-01 |

|            |         |          |                 |          |          |
|------------|---------|----------|-----------------|----------|----------|
| rs835632   | 3 NCK1  | 0.28 Rec | 0.78(0.41-1.49) | 4.51E-01 | 6.89E-01 |
| rs13428968 | 2 NR4A2 | 0.26 Dom | 0.71(0.51-0.99) | 4.16E-02 | 3.72E-01 |
| rs834834   | 2 NR4A2 | 0.43 Dom | 0.76(0.54-1.05) | 9.82E-02 | 6.32E-01 |
| rs1150144  | 2 NR4A2 | 0.43 Dom | 0.76(0.54-1.06) | 1.01E-01 | 6.43E-01 |
| rs1150143  | 2 NR4A2 | 0.43 Dom | 0.76(0.54-1.06) | 1.03E-01 | 6.46E-01 |
| rs707130   | 2 NR4A2 | 0.43 Dom | 0.77(0.55-1.08) | 1.28E-01 | 7.15E-01 |
| rs834835   | 2 NR4A2 | 0.43 Dom | 0.77(0.55-1.08) | 1.28E-01 | 7.15E-01 |
| rs16840214 | 2 NR4A2 | 0.34 Add | 1.03(0.81-1.3)  | 8.33E-01 | 8.33E-01 |
| rs12803    | 2 NR4A2 | 0.16 Rec | 1.74(0.76-4)    | 1.93E-01 | 8.65E-01 |
| rs834830   | 2 NR4A2 | 0.46 Dom | 0.85(0.6-1.2)   | 3.52E-01 | 8.80E-01 |
| rs834829   | 2 NR4A2 | 0.46 Dom | 0.85(0.6-1.2)   | 3.62E-01 | 8.83E-01 |
| rs3769340  | 2 NR4A2 | 0.13 Dom | 1.15(0.8-1.66)  | 4.39E-01 | 9.07E-01 |
| rs707127   | 2 NR4A2 | 0.33 Dom | 1.12(0.81-1.54) | 5.04E-01 | 9.09E-01 |
| rs16840216 | 2 NR4A2 | 0.34 Dom | 1.07(0.78-1.48) | 6.74E-01 | 9.22E-01 |
| rs10195293 | 2 NR4A2 | 0.34 Dom | 1.07(0.78-1.48) | 6.74E-01 | 9.22E-01 |
| rs1528454  | 2 NR4A2 | 0.34 Dom | 1.07(0.78-1.48) | 6.74E-01 | 9.22E-01 |
| rs2768762  | 1 NTRK1 | 0.21 Rec | 2.28(1.12-4.67) | 2.36E-02 | 4.66E-01 |
| rs12132885 | 1 NTRK1 | 0.03 Dom | 1.69(0.94-3.04) | 8.04E-02 | 6.07E-01 |
| rs1800879  | 1 NTRK1 | 0.05 Add | 1.4(0.89-2.22)  | 1.50E-01 | 8.07E-01 |
| rs6677720  | 1 NTRK1 | 0.08 Add | 1.28(0.88-1.85) | 1.94E-01 | 8.10E-01 |
| rs1800878  | 1 NTRK1 | 0.08 Add | 1.28(0.88-1.85) | 1.94E-01 | 8.11E-01 |
| rs2644604  | 1 NTRK1 | 0.35 Dom | 1.03(0.75-1.43) | 8.49E-01 | 8.49E-01 |
| rs2274497  | 1 NTRK1 | 0.07 Dom | 1.3(0.83-2.02)  | 2.47E-01 | 8.77E-01 |
| rs2644620  | 1 NTRK1 | 0.32 Rec | 0.9(0.51-1.57)  | 7.06E-01 | 9.09E-01 |
| rs2986716  | 1 NTRK1 | 0.32 Rec | 0.9(0.51-1.57)  | 7.06E-01 | 9.09E-01 |
| rs2644621  | 1 NTRK1 | 0.32 Rec | 0.9(0.51-1.57)  | 7.06E-01 | 9.09E-01 |
| rs2935228  | 1 NTRK1 | 0.32 Rec | 0.9(0.51-1.57)  | 7.06E-01 | 9.09E-01 |
| rs10908523 | 1 NTRK1 | 0.05 Add | 1.32(0.82-2.12) | 2.52E-01 | 9.15E-01 |
| rs6337     | 1 NTRK1 | 0.05 Dom | 1.31(0.79-2.19) | 2.99E-01 | 9.28E-01 |
| rs11264577 | 1 NTRK1 | 0.07 Dom | 1.22(0.78-1.92) | 3.78E-01 | 9.45E-01 |
| rs2644596  | 1 NTRK1 | 0.42 Rec | 1.18(0.78-1.78) | 4.26E-01 | 9.55E-01 |
| rs12564129 | 1 NTRK1 | 0.50 Rec | 1.18(0.82-1.68) | 3.74E-01 | 9.67E-01 |
| rs943551   | 1 NTRK1 | 0.50 Rec | 1.18(0.82-1.68) | 3.74E-01 | 9.67E-01 |
| rs1800880  | 1 NTRK1 | 0.49 Rec | 1.17(0.81-1.67) | 4.07E-01 | 9.72E-01 |
| rs943552   | 1 NTRK1 | 0.50 Rec | 1.2(0.84-1.71)  | 3.25E-01 | 9.75E-01 |
| rs12239574 | 1 NTRK1 | 0.01 Add | 0.73(0.24-2.22) | 5.74E-01 | 9.77E-01 |
| rs1410082  | 1 NTRK1 | 0.01 Add | 0.7(0.23-2.15)  | 5.38E-01 | 9.80E-01 |

|            |   |       |      |     |                 |          |          |
|------------|---|-------|------|-----|-----------------|----------|----------|
| rs6334     | 1 | NTRK1 | 0.32 | Rec | 0.75(0.43-1.33) | 3.27E-01 | 9.80E-01 |
| rs610231   | 6 | OPRM1 | 0.06 | Add | 1.69(1.09-2.62) | 1.88E-02 | 4.00E-01 |
| rs3778158  | 6 | OPRM1 | 0.05 | Dom | 0.52(0.28-0.96) | 3.81E-02 | 4.01E-01 |
| rs3778157  | 6 | OPRM1 | 0.05 | Dom | 0.52(0.28-0.96) | 3.81E-02 | 4.02E-01 |
| rs634479   | 6 | OPRM1 | 0.04 | Add | 0.51(0.26-1)    | 5.02E-02 | 4.79E-01 |
| rs540825   | 6 | OPRM1 | 0.06 | Dom | 1.67(1.06-2.62) | 2.67E-02 | 4.80E-01 |
| rs607759   | 6 | OPRM1 | 0.05 | Dom | 0.55(0.3-1)     | 4.90E-02 | 4.84E-01 |
| rs7773995  | 6 | OPRM1 | 0.05 | Dom | 0.55(0.3-1)     | 4.91E-02 | 4.85E-01 |
| rs524731   | 6 | OPRM1 | 0.05 | Dom | 0.55(0.3-1)     | 5.18E-02 | 5.04E-01 |
| rs3823010  | 6 | OPRM1 | 0.05 | Dom | 0.55(0.3-1)     | 5.18E-02 | 5.04E-01 |
| rs1461773  | 6 | OPRM1 | 0.05 | Dom | 0.55(0.3-1)     | 5.18E-02 | 5.05E-01 |
| rs3778150  | 6 | OPRM1 | 0.05 | Dom | 0.55(0.3-1)     | 5.18E-02 | 5.05E-01 |
| rs6927269  | 6 | OPRM1 | 0.05 | Dom | 0.55(0.3-1)     | 5.18E-02 | 5.05E-01 |
| rs3778149  | 6 | OPRM1 | 0.05 | Dom | 0.55(0.3-1)     | 5.18E-02 | 5.05E-01 |
| rs1381376  | 6 | OPRM1 | 0.05 | Dom | 0.55(0.3-1)     | 5.18E-02 | 5.05E-01 |
| rs3778151  | 6 | OPRM1 | 0.05 | Dom | 0.55(0.3-1)     | 5.18E-02 | 5.06E-01 |
| rs9479754  | 6 | OPRM1 | 0.05 | Dom | 0.55(0.3-1)     | 5.18E-02 | 5.06E-01 |
| rs3778145  | 6 | OPRM1 | 0.05 | Dom | 0.55(0.3-1)     | 5.18E-02 | 5.06E-01 |
| rs511435   | 6 | OPRM1 | 0.05 | Dom | 0.55(0.3-1)     | 5.18E-02 | 5.06E-01 |
| rs3778147  | 6 | OPRM1 | 0.05 | Dom | 0.55(0.3-1)     | 5.18E-02 | 5.06E-01 |
| rs499796   | 6 | OPRM1 | 0.05 | Dom | 0.55(0.3-1)     | 5.18E-02 | 5.06E-01 |
| rs17209711 | 6 | OPRM1 | 0.05 | Dom | 0.55(0.3-1.01)  | 5.32E-02 | 5.15E-01 |
| rs3778155  | 6 | OPRM1 | 0.05 | Dom | 0.55(0.3-1.01)  | 5.44E-02 | 5.22E-01 |
| rs3778148  | 6 | OPRM1 | 0.05 | Add | 0.53(0.28-1.02) | 5.56E-02 | 5.22E-01 |
| rs9478501  | 6 | OPRM1 | 0.05 | Add | 0.53(0.28-1.02) | 5.56E-02 | 5.22E-01 |
| rs7772959  | 6 | OPRM1 | 0.05 | Add | 0.53(0.28-1.02) | 5.56E-02 | 5.22E-01 |
| rs668394   | 6 | OPRM1 | 0.05 | Add | 0.53(0.28-1.02) | 5.56E-02 | 5.22E-01 |
| rs9478503  | 6 | OPRM1 | 0.05 | Add | 0.53(0.28-1.02) | 5.56E-02 | 5.22E-01 |
| rs6923231  | 6 | OPRM1 | 0.05 | Add | 0.53(0.28-1.02) | 5.56E-02 | 5.22E-01 |
| rs3778146  | 6 | OPRM1 | 0.05 | Add | 0.53(0.28-1.02) | 5.56E-02 | 5.23E-01 |
| rs9285542  | 6 | OPRM1 | 0.05 | Add | 0.53(0.28-1.02) | 5.56E-02 | 5.23E-01 |
| rs3778153  | 6 | OPRM1 | 0.05 | Add | 0.53(0.28-1.02) | 5.56E-02 | 5.23E-01 |
| rs509544   | 6 | OPRM1 | 0.05 | Add | 0.53(0.28-1.02) | 5.56E-02 | 5.23E-01 |
| rs520321   | 6 | OPRM1 | 0.05 | Add | 0.53(0.28-1.02) | 5.56E-02 | 5.24E-01 |
| rs9478504  | 6 | OPRM1 | 0.04 | Add | 0.53(0.28-1.02) | 5.64E-02 | 5.27E-01 |
| rs17275521 | 6 | OPRM1 | 0.04 | Add | 0.53(0.28-1.02) | 5.64E-02 | 5.29E-01 |
| rs477292   | 6 | OPRM1 | 0.05 | Dom | 0.56(0.3-1.01)  | 5.59E-02 | 5.33E-01 |

|            |         |          |                 |          |          |
|------------|---------|----------|-----------------|----------|----------|
| rs6936615  | 6 OPRM1 | 0.05 Dom | 0.56(0.3-1.01)  | 5.59E-02 | 5.33E-01 |
| rs557748   | 6 OPRM1 | 0.05 Dom | 0.56(0.3-1.01)  | 5.59E-02 | 5.33E-01 |
| rs9322445  | 6 OPRM1 | 0.05 Dom | 0.56(0.3-1.01)  | 5.59E-02 | 5.33E-01 |
| rs3798678  | 6 OPRM1 | 0.04 Add | 0.54(0.28-1.03) | 5.97E-02 | 5.48E-01 |
| rs9479757  | 6 OPRM1 | 0.06 Dom | 0.57(0.32-1.02) | 5.94E-02 | 5.59E-01 |
| rs3778156  | 6 OPRM1 | 0.04 Add | 0.54(0.28-1.04) | 6.66E-02 | 5.88E-01 |
| rs10485057 | 6 OPRM1 | 0.04 Add | 0.52(0.26-1.05) | 6.97E-02 | 5.93E-01 |
| rs9479756  | 6 OPRM1 | 0.04 Add | 0.57(0.3-1.1)   | 9.61E-02 | 7.33E-01 |
| rs636433   | 6 OPRM1 | 0.02 Add | 0.44(0.15-1.3)  | 1.38E-01 | 8.10E-01 |
| rs649840   | 6 OPRM1 | 0.02 Add | 0.44(0.15-1.3)  | 1.38E-01 | 8.10E-01 |
| rs514980   | 6 OPRM1 | 0.06 Dom | 0.65(0.37-1.11) | 1.16E-01 | 8.12E-01 |
| rs544093   | 6 OPRM1 | 0.02 Add | 0.45(0.15-1.34) | 1.52E-01 | 8.44E-01 |
| rs556716   | 6 OPRM1 | 0.02 Add | 0.45(0.15-1.34) | 1.52E-01 | 8.45E-01 |
| rs628618   | 6 OPRM1 | 0.02 Add | 0.45(0.15-1.34) | 1.52E-01 | 8.45E-01 |
| rs620496   | 6 OPRM1 | 0.02 Add | 0.41(0.12-1.42) | 1.59E-01 | 8.48E-01 |
| rs616585   | 6 OPRM1 | 0.02 Add | 0.46(0.16-1.35) | 1.58E-01 | 8.57E-01 |
| rs653011   | 6 OPRM1 | 0.01 Add | 0.42(0.12-1.47) | 1.75E-01 | 8.79E-01 |
| rs625109   | 6 OPRM1 | 0.01 Add | 0.42(0.12-1.47) | 1.75E-01 | 8.79E-01 |
| rs511420   | 6 OPRM1 | 0.01 Add | 0.42(0.12-1.47) | 1.75E-01 | 8.79E-01 |
| rs645189   | 6 OPRM1 | 0.01 Add | 0.42(0.12-1.47) | 1.75E-01 | 8.79E-01 |
| rs635522   | 6 OPRM1 | 0.01 Add | 0.42(0.12-1.47) | 1.75E-01 | 8.80E-01 |
| rs494328   | 6 OPRM1 | 0.01 Add | 0.42(0.12-1.47) | 1.75E-01 | 8.80E-01 |
| rs632395   | 6 OPRM1 | 0.02 Add | 0.51(0.19-1.34) | 1.71E-01 | 8.87E-01 |
| rs589046   | 6 OPRM1 | 0.14 Add | 0.74(0.53-1.05) | 9.14E-02 | 8.96E-01 |
| rs650245   | 6 OPRM1 | 0.02 Add | 0.48(0.16-1.43) | 1.89E-01 | 9.08E-01 |
| rs617648   | 6 OPRM1 | 0.02 Add | 0.48(0.16-1.43) | 1.89E-01 | 9.09E-01 |
| rs653107   | 6 OPRM1 | 0.02 Add | 0.48(0.16-1.43) | 1.89E-01 | 9.09E-01 |
| rs664247   | 6 OPRM1 | 0.02 Add | 0.48(0.16-1.43) | 1.89E-01 | 9.09E-01 |
| rs590761   | 6 OPRM1 | 0.02 Add | 0.48(0.16-1.43) | 1.89E-01 | 9.09E-01 |
| rs606148   | 6 OPRM1 | 0.02 Add | 0.52(0.2-1.38)  | 1.90E-01 | 9.12E-01 |
| rs599945   | 6 OPRM1 | 0.02 Add | 0.52(0.2-1.38)  | 1.90E-01 | 9.12E-01 |
| rs495491   | 6 OPRM1 | 0.14 Dom | 0.72(0.5-1.06)  | 9.66E-02 | 9.24E-01 |
| rs613341   | 6 OPRM1 | 0.02 Add | 0.54(0.2-1.43)  | 2.11E-01 | 9.36E-01 |
| rs676252   | 6 OPRM1 | 0.09 Dom | 1.32(0.88-1.97) | 1.81E-01 | 9.44E-01 |
| rs13194785 | 6 OPRM1 | 0.09 Dom | 1.33(0.88-1.99) | 1.73E-01 | 9.45E-01 |
| rs13193545 | 6 OPRM1 | 0.02 Add | 0.6(0.26-1.39)  | 2.32E-01 | 9.50E-01 |
| rs650825   | 6 OPRM1 | 0.09 Dom | 1.31(0.87-1.96) | 1.91E-01 | 9.54E-01 |

|            |         |          |                 |          |          |
|------------|---------|----------|-----------------|----------|----------|
| rs609148   | 6 OPRM1 | 0.09 Dom | 1.31(0.87-1.96) | 1.91E-01 | 9.54E-01 |
| rs633387   | 6 OPRM1 | 0.09 Dom | 1.31(0.87-1.96) | 1.91E-01 | 9.54E-01 |
| rs504932   | 6 OPRM1 | 0.09 Dom | 1.31(0.87-1.96) | 1.91E-01 | 9.55E-01 |
| rs558948   | 6 OPRM1 | 0.09 Dom | 1.31(0.87-1.96) | 1.91E-01 | 9.55E-01 |
| rs606545   | 6 OPRM1 | 0.09 Dom | 1.31(0.87-1.96) | 1.91E-01 | 9.55E-01 |
| rs647192   | 6 OPRM1 | 0.09 Dom | 1.31(0.87-1.96) | 1.91E-01 | 9.55E-01 |
| rs510769   | 6 OPRM1 | 0.14 Dom | 0.75(0.51-1.09) | 1.33E-01 | 9.60E-01 |
| rs648893   | 6 OPRM1 | 0.09 Dom | 1.3(0.87-1.94)  | 2.07E-01 | 9.62E-01 |
| rs583664   | 6 OPRM1 | 0.09 Dom | 1.28(0.85-1.92) | 2.37E-01 | 9.76E-01 |
| rs642489   | 6 OPRM1 | 0.09 Dom | 1.28(0.85-1.92) | 2.37E-01 | 9.76E-01 |
| rs623956   | 6 OPRM1 | 0.09 Dom | 1.29(0.85-1.95) | 2.35E-01 | 9.76E-01 |
| rs677830   | 6 OPRM1 | 0.09 Dom | 1.27(0.85-1.9)  | 2.49E-01 | 9.80E-01 |
| rs644261   | 6 OPRM1 | 0.09 Dom | 1.27(0.85-1.9)  | 2.49E-01 | 9.80E-01 |
| rs1799971  | 6 OPRM1 | 0.35 Rec | 1(0.62-1.63)    | 9.88E-01 | 9.88E-01 |
| rs613355   | 6 OPRM1 | 0.11 Rec | 0.92(0.19-4.5)  | 9.22E-01 | 9.94E-01 |
| rs1323041  | 6 OPRM1 | 0.21 Rec | 1.15(0.56-2.35) | 7.10E-01 | 9.99E-01 |
| rs563649   | 6 OPRM1 | 0.09 Dom | 0.86(0.56-1.33) | 5.06E-01 | 1.00E+00 |
| rs9322446  | 6 OPRM1 | 0.05 Add | 1.21(0.73-1.99) | 4.59E-01 | 1.00E+00 |
| rs9478506  | 6 OPRM1 | 0.05 Add | 1.19(0.72-1.96) | 4.98E-01 | 1.00E+00 |
| rs9371776  | 6 OPRM1 | 0.01 Add | 0.63(0.14-2.84) | 5.51E-01 | 1.00E+00 |
| rs10485058 | 6 OPRM1 | 0.04 Add | 1.19(0.7-2.03)  | 5.19E-01 | 1.00E+00 |
| rs648007   | 6 OPRM1 | 0.11 Dom | 1.12(0.76-1.66) | 5.53E-01 | 1.00E+00 |
| rs2010884  | 6 OPRM1 | 0.39 Add | 1.01(0.79-1.3)  | 9.16E-01 | 1.00E+00 |
| rs10457090 | 6 OPRM1 | 0.09 Dom | 0.9(0.59-1.39)  | 6.47E-01 | 1.00E+00 |
| rs7748401  | 6 OPRM1 | 0.09 Dom | 0.9(0.59-1.39)  | 6.47E-01 | 1.00E+00 |
| rs3778152  | 6 OPRM1 | 0.09 Dom | 0.9(0.59-1.39)  | 6.47E-01 | 1.00E+00 |
| rs3798683  | 6 OPRM1 | 0.37 Dom | 0.88(0.63-1.21) | 4.27E-01 | 1.00E+00 |
| rs12205732 | 6 OPRM1 | 0.09 Add | 0.96(0.64-1.43) | 8.24E-01 | 1.00E+00 |
| rs12209447 | 6 OPRM1 | 0.09 Add | 0.96(0.64-1.43) | 8.24E-01 | 1.00E+00 |
| rs6912029  | 6 OPRM1 | 0.09 Add | 0.96(0.64-1.43) | 8.24E-01 | 1.00E+00 |
| rs12210856 | 6 OPRM1 | 0.09 Add | 0.95(0.64-1.43) | 8.21E-01 | 1.00E+00 |
| rs1323042  | 6 OPRM1 | 0.21 Rec | 1.22(0.57-2.6)  | 6.08E-01 | 1.00E+00 |
| rs2075572  | 6 OPRM1 | 0.21 Rec | 1.21(0.59-2.47) | 6.07E-01 | 1.00E+00 |
| rs9282821  | 6 OPRM1 | 0.21 Rec | 1.21(0.59-2.47) | 6.07E-01 | 1.00E+00 |
| rs1853384  | 6 OPRM1 | 0.11 Rec | 0.77(0.16-3.69) | 7.47E-01 | 1.00E+00 |
| rs618207   | 6 OPRM1 | 0.11 Rec | 0.77(0.16-3.69) | 7.47E-01 | 1.00E+00 |
| rs548646   | 6 OPRM1 | 0.11 Rec | 0.77(0.16-3.69) | 7.47E-01 | 1.00E+00 |

|            |          |          |                 |          |          |
|------------|----------|----------|-----------------|----------|----------|
| rs3798688  | 6 OPRM1  | 0.09 Add | 0.97(0.66-1.43) | 8.84E-01 | 1.00E+00 |
| rs598160   | 6 OPRM1  | 0.11 Add | 1.05(0.74-1.5)  | 7.85E-01 | 1.00E+00 |
| rs12203621 | 6 OPRM1  | 0.09 Add | 0.97(0.66-1.43) | 8.82E-01 | 1.00E+00 |
| rs599548   | 6 OPRM1  | 0.09 Add | 0.97(0.66-1.43) | 8.82E-01 | 1.00E+00 |
| rs645027   | 6 OPRM1  | 0.10 Rec | 0.85(0.23-3.1)  | 8.10E-01 | 1.00E+00 |
| rs3798676  | 6 OPRM1  | 0.09 Add | 0.93(0.62-1.4)  | 7.37E-01 | 1.00E+00 |
| rs9322447  | 6 OPRM1  | 0.21 Rec | 1.22(0.59-2.5)  | 5.89E-01 | 1.00E+00 |
| rs681243   | 6 OPRM1  | 0.11 Dom | 1.11(0.76-1.63) | 5.96E-01 | 1.00E+00 |
| rs4870266  | 6 OPRM1  | 0.19 Rec | 1.39(0.52-3.71) | 5.17E-01 | 1.00E+00 |
| rs7180829  | 15 PAR4  | 0.25 Rec | 0.75(0.37-1.5)  | 4.15E-01 | 8.09E-01 |
| rs11855532 | 15 PAR4  | 0.26 Rec | 0.73(0.38-1.42) | 3.54E-01 | 8.55E-01 |
| rs1883005  | 15 PAR4  | 0.31 Add | 1.02(0.8-1.31)  | 8.66E-01 | 8.66E-01 |
| rs2739768  | 15 PAR4  | 0.25 Rec | 0.69(0.33-1.48) | 3.44E-01 | 8.79E-01 |
| rs2739765  | 15 PAR4  | 0.25 Dom | 1.17(0.85-1.62) | 3.25E-01 | 9.21E-01 |
| rs1883006  | 15 PAR4  | 0.30 Dom | 1.18(0.86-1.63) | 3.05E-01 | 9.42E-01 |
| rs2719923  | 15 PAR4  | 0.03 Dom | 1.28(0.67-2.45) | 4.49E-01 | 9.66E-01 |
| rs3026681  | 22 PICK1 | 0.01 Add | 0.36(0.1-1.25)  | 1.08E-01 | 6.55E-01 |
| rs3026688  | 22 PICK1 | 0.23 Add | 1.29(1-1.66)    | 5.45E-02 | 6.60E-01 |
| rs760973   | 22 PICK1 | 0.23 Add | 0.78(0.6-1.03)  | 7.79E-02 | 8.18E-01 |
| rs742395   | 22 PICK1 | 0.23 Add | 0.78(0.6-1.03)  | 7.79E-02 | 8.18E-01 |
| rs4384887  | 22 PICK1 | 0.23 Add | 0.78(0.6-1.03)  | 7.79E-02 | 8.18E-01 |
| rs5756890  | 22 PICK1 | 0.23 Add | 0.78(0.6-1.03)  | 7.79E-02 | 8.18E-01 |
| rs13054174 | 22 PICK1 | 0.01 Add | 0.89(0.29-2.75) | 8.41E-01 | 8.39E-01 |
| rs13053681 | 22 PICK1 | 0.29 Rec | 1.65(0.97-2.8)  | 6.58E-02 | 8.64E-01 |
| rs4821732  | 22 PICK1 | 0.03 Add | 0.6(0.28-1.28)  | 1.86E-01 | 8.84E-01 |
| rs2076372  | 22 PICK1 | 0.37 Dom | 1.32(0.95-1.84) | 1.00E-01 | 9.04E-01 |
| rs8142185  | 22 PICK1 | 0.35 Rec | 0.88(0.54-1.43) | 5.97E-01 | 9.72E-01 |
| rs737662   | 22 PICK1 | 0.35 Rec | 0.88(0.54-1.43) | 5.97E-01 | 9.72E-01 |
| rs1004764  | 22 PICK1 | 0.08 Add | 0.8(0.52-1.23)  | 3.11E-01 | 9.77E-01 |
| rs4821733  | 22 PICK1 | 0.37 Add | 0.85(0.67-1.08) | 1.76E-01 | 9.82E-01 |
| rs6000987  | 22 PICK1 | 0.03 Add | 0.92(0.49-1.73) | 7.98E-01 | 9.91E-01 |
| rs2076371  | 22 PICK1 | 0.07 Add | 0.82(0.52-1.29) | 3.83E-01 | 9.96E-01 |
| rs760975   | 22 PICK1 | 0.20 Add | 0.96(0.72-1.28) | 7.63E-01 | 9.96E-01 |
| rs2012859  | 22 PICK1 | 0.36 Rec | 1.17(0.74-1.86) | 5.07E-01 | 9.99E-01 |
| rs3952     | 22 PICK1 | 0.36 Rec | 0.79(0.49-1.29) | 3.53E-01 | 9.99E-01 |
| rs8135665  | 22 PICK1 | 0.10 Dom | 0.89(0.59-1.34) | 5.66E-01 | 1.00E+00 |
| rs742396   | 22 PICK1 | 0.28 Dom | 0.93(0.67-1.28) | 6.37E-01 | 1.00E+00 |

|            |            |          |                 |          |          |
|------------|------------|----------|-----------------|----------|----------|
| rs3948     | 22 PICK1   | 0.36 Rec | 0.82(0.5-1.33)  | 4.14E-01 | 1.00E+00 |
| rs3026685  | 22 PICK1   | 0.36 Rec | 0.82(0.5-1.33)  | 4.14E-01 | 1.00E+00 |
| rs4821735  | 22 PICK1   | 0.28 Rec | 1.23(0.7-2.19)  | 4.71E-01 | 1.00E+00 |
| rs2076369  | 22 PICK1   | 0.28 Rec | 1.23(0.7-2.19)  | 4.71E-01 | 1.00E+00 |
| rs2076370  | 22 PICK1   | 0.28 Rec | 1.23(0.7-2.19)  | 4.71E-01 | 1.00E+00 |
| rs6000991  | 22 PICK1   | 0.28 Rec | 1.23(0.7-2.19)  | 4.71E-01 | 1.00E+00 |
| rs738443   | 22 PICK1   | 0.28 Rec | 1.23(0.7-2.19)  | 4.71E-01 | 1.00E+00 |
| rs5756908  | 22 PICK1   | 0.48 Rec | 0.85(0.58-1.24) | 3.98E-01 | 1.00E+00 |
| rs2235573  | 22 PICK1   | 0.48 Rec | 0.85(0.58-1.24) | 3.98E-01 | 1.00E+00 |
| rs2018980  | 22 PICK1   | 0.28 Dom | 0.91(0.66-1.26) | 5.80E-01 | 1.00E+00 |
| rs2267366  | 22 PICK1   | 0.15 Rec | 1.22(0.44-3.4)  | 7.08E-01 | 1.00E+00 |
| rs1561289  | 2 POMC     | 0.29 Dom | 0.71(0.52-0.98) | 4.01E-02 | 4.79E-01 |
| rs13428823 | 2 POMC     | 0.29 Dom | 0.73(0.53-1.01) | 5.55E-02 | 5.85E-01 |
| rs3795955  | 2 POMC     | 0.25 Dom | 0.74(0.53-1.02) | 6.89E-02 | 6.41E-01 |
| rs3731634  | 2 POMC     | 0.35 Dom | 1.35(0.97-1.87) | 7.51E-02 | 6.48E-01 |
| rs6545976  | 2 POMC     | 0.09 Dom | 0.96(0.62-1.48) | 8.39E-01 | 8.39E-01 |
| rs6719226  | 2 POMC     | 0.09 Dom | 0.96(0.62-1.48) | 8.39E-01 | 8.39E-01 |
| rs4665775  | 2 POMC     | 0.17 Add | 0.82(0.6-1.12)  | 2.08E-01 | 9.37E-01 |
| rs4665773  | 2 POMC     | 0.17 Add | 0.82(0.6-1.12)  | 2.08E-01 | 9.37E-01 |
| rs874401   | 2 POMC     | 0.17 Add | 0.82(0.6-1.12)  | 2.08E-01 | 9.37E-01 |
| rs4665771  | 2 POMC     | 0.17 Add | 0.82(0.6-1.12)  | 2.08E-01 | 9.37E-01 |
| rs4665774  | 2 POMC     | 0.17 Add | 0.82(0.6-1.12)  | 2.08E-01 | 9.37E-01 |
| rs6545975  | 2 POMC     | 0.38 Rec | 0.89(0.57-1.39) | 5.97E-01 | 9.71E-01 |
| rs3769671  | 2 POMC     | 0.06 Dom | 0.84(0.5-1.43)  | 5.29E-01 | 9.79E-01 |
| rs934778   | 2 POMC     | 0.12 Dom | 1.14(0.79-1.65) | 4.89E-01 | 9.81E-01 |
| rs12473543 | 2 POMC     | 0.39 Rec | 0.89(0.57-1.38) | 5.93E-01 | 9.86E-01 |
| rs7605927  | 2 POMC     | 0.38 Dom | 1.09(0.79-1.52) | 5.95E-01 | 9.90E-01 |
| rs1866146  | 2 POMC     | 0.38 Dom | 1.09(0.78-1.52) | 6.04E-01 | 9.91E-01 |
| rs2118404  | 2 POMC     | 0.38 Rec | 0.86(0.55-1.35) | 5.17E-01 | 9.92E-01 |
| rs6713532  | 2 POMC     | 0.39 Dom | 1.08(0.78-1.51) | 6.43E-01 | 9.94E-01 |
| rs7565877  | 2 POMC     | 0.05 Dom | 0.91(0.53-1.55) | 7.30E-01 | 9.97E-01 |
| rs1495099  | 17 PPP1R1B | 0.44 Rec | 1.31(0.88-1.93) | 1.82E-01 | 7.17E-01 |
| rs879606   | 17 PPP1R1B | 0.44 Rec | 1.27(0.86-1.88) | 2.24E-01 | 7.92E-01 |
| rs907094   | 17 PPP1R1B | 0.44 Rec | 1.27(0.86-1.87) | 2.37E-01 | 8.10E-01 |
| rs3764352  | 17 PPP1R1B | 0.44 Rec | 1.27(0.86-1.87) | 2.37E-01 | 8.10E-01 |
| rs12453682 | 17 PPP1R1B | 0.43 Rec | 1.26(0.85-1.87) | 2.46E-01 | 8.21E-01 |
| rs9915323  | 17 PPP1R1B | 0.45 Rec | 1.25(0.84-1.84) | 2.68E-01 | 8.36E-01 |



|            |            |          |                 |          |          |
|------------|------------|----------|-----------------|----------|----------|
| rs2271309  | 17 PPP1R1B | 0.44 Rec | 1.2(0.81-1.78)  | 3.65E-01 | 8.39E-01 |
| rs1874228  | 17 PPP1R1B | 0.44 Rec | 1.23(0.82-1.82) | 3.12E-01 | 8.76E-01 |
| rs9972882  | 17 PPP1R1B | 0.41 Add | 1.09(0.87-1.37) | 4.69E-01 | 9.15E-01 |
| rs1877032  | 17 PPP1R1B | 0.02 Add | 0.99(0.39-2.53) | 9.90E-01 | 9.90E-01 |
| rs717099   | 7 PRKAR2B  | 0.48 Dom | 0.72(0.51-1.02) | 6.82E-02 | 9.05E-01 |
| rs17153861 | 7 PRKAR2B  | 0.09 Add | 0.75(0.5-1.13)  | 1.69E-01 | 9.54E-01 |
| rs2191917  | 7 PRKAR2B  | 0.09 Add | 0.75(0.5-1.13)  | 1.69E-01 | 9.54E-01 |
| rs10248105 | 7 PRKAR2B  | 0.09 Add | 0.75(0.5-1.13)  | 1.69E-01 | 9.54E-01 |
| rs1860805  | 7 PRKAR2B  | 0.09 Add | 0.75(0.5-1.13)  | 1.69E-01 | 9.54E-01 |
| rs1860804  | 7 PRKAR2B  | 0.09 Add | 0.75(0.5-1.13)  | 1.69E-01 | 9.54E-01 |
| rs11760966 | 7 PRKAR2B  | 0.09 Add | 0.75(0.5-1.13)  | 1.69E-01 | 9.54E-01 |
| rs7778076  | 7 PRKAR2B  | 0.09 Add | 0.75(0.5-1.13)  | 1.69E-01 | 9.54E-01 |
| rs11764389 | 7 PRKAR2B  | 0.09 Add | 0.76(0.51-1.14) | 1.86E-01 | 9.68E-01 |
| rs11767753 | 7 PRKAR2B  | 0.09 Add | 0.76(0.51-1.14) | 1.86E-01 | 9.68E-01 |
| rs17425839 | 7 PRKAR2B  | 0.09 Add | 0.76(0.51-1.14) | 1.86E-01 | 9.68E-01 |
| rs10227616 | 7 PRKAR2B  | 0.40 Rec | 0.99(0.65-1.52) | 9.75E-01 | 9.75E-01 |
| rs12154324 | 7 PRKAR2B  | 0.09 Add | 0.77(0.51-1.16) | 2.11E-01 | 9.81E-01 |
| rs2395836  | 7 PRKAR2B  | 0.41 Dom | 0.77(0.55-1.08) | 1.33E-01 | 9.84E-01 |
| rs17340577 | 7 PRKAR2B  | 0.09 Add | 0.78(0.52-1.17) | 2.30E-01 | 9.84E-01 |
| rs6960148  | 7 PRKAR2B  | 0.10 Add | 0.78(0.53-1.16) | 2.24E-01 | 9.86E-01 |
| rs975935   | 7 PRKAR2B  | 0.10 Add | 0.78(0.53-1.16) | 2.24E-01 | 9.86E-01 |
| rs257375   | 7 PRKAR2B  | 0.10 Add | 0.78(0.53-1.16) | 2.24E-01 | 9.86E-01 |
| rs6977868  | 7 PRKAR2B  | 0.10 Add | 0.78(0.53-1.16) | 2.24E-01 | 9.86E-01 |
| rs257382   | 7 PRKAR2B  | 0.10 Add | 0.78(0.53-1.16) | 2.24E-01 | 9.86E-01 |
| rs257372   | 7 PRKAR2B  | 0.10 Add | 0.78(0.53-1.16) | 2.24E-01 | 9.86E-01 |
| rs3779500  | 7 PRKAR2B  | 0.10 Add | 0.78(0.53-1.16) | 2.24E-01 | 9.86E-01 |
| rs257378   | 7 PRKAR2B  | 0.10 Add | 0.78(0.53-1.16) | 2.24E-01 | 9.86E-01 |
| rs257377   | 7 PRKAR2B  | 0.10 Add | 0.78(0.53-1.16) | 2.24E-01 | 9.86E-01 |
| rs1981696  | 7 PRKAR2B  | 0.10 Add | 0.78(0.53-1.16) | 2.24E-01 | 9.86E-01 |
| rs3729876  | 7 PRKAR2B  | 0.10 Add | 0.78(0.53-1.16) | 2.24E-01 | 9.86E-01 |
| rs257373   | 7 PRKAR2B  | 0.10 Add | 0.78(0.53-1.16) | 2.24E-01 | 9.86E-01 |
| rs3729877  | 7 PRKAR2B  | 0.10 Add | 0.78(0.53-1.16) | 2.24E-01 | 9.86E-01 |
| rs6946931  | 7 PRKAR2B  | 0.10 Add | 0.78(0.53-1.16) | 2.24E-01 | 9.86E-01 |
| rs6466160  | 7 PRKAR2B  | 0.10 Add | 0.78(0.53-1.16) | 2.24E-01 | 9.86E-01 |
| rs10253291 | 7 PRKAR2B  | 0.10 Add | 0.78(0.53-1.16) | 2.24E-01 | 9.86E-01 |
| rs12705405 | 7 PRKAR2B  | 0.10 Add | 0.78(0.53-1.16) | 2.24E-01 | 9.86E-01 |
| rs10253172 | 7 PRKAR2B  | 0.10 Add | 0.78(0.53-1.16) | 2.24E-01 | 9.86E-01 |

|            |           |          |                 |          |          |
|------------|-----------|----------|-----------------|----------|----------|
| rs6947857  | 7 PRKAR2B | 0.10 Add | 0.78(0.53-1.16) | 2.24E-01 | 9.86E-01 |
| rs257387   | 7 PRKAR2B | 0.10 Rec | 0.25(0.03-2.08) | 2.02E-01 | 9.86E-01 |
| rs2250121  | 7 PRKAR2B | 0.09 Add | 0.79(0.53-1.18) | 2.45E-01 | 9.88E-01 |
| rs12055940 | 7 PRKAR2B | 0.09 Add | 0.79(0.53-1.18) | 2.45E-01 | 9.88E-01 |
| rs9656136  | 7 PRKAR2B | 0.13 Rec | 2.52(0.74-8.62) | 1.40E-01 | 9.91E-01 |
| rs13311274 | 7 PRKAR2B | 0.48 Add | 0.85(0.68-1.07) | 1.72E-01 | 9.93E-01 |
| rs11767623 | 7 PRKAR2B | 0.10 Add | 0.81(0.55-1.19) | 2.85E-01 | 9.93E-01 |
| rs6466156  | 7 PRKAR2B | 0.48 Rec | 0.83(0.57-1.22) | 3.47E-01 | 9.95E-01 |
| rs10281856 | 7 PRKAR2B | 0.48 Add | 0.86(0.68-1.08) | 1.90E-01 | 9.95E-01 |
| rs1860803  | 7 PRKAR2B | 0.48 Add | 0.87(0.69-1.1)  | 2.48E-01 | 9.96E-01 |
| rs6955387  | 7 PRKAR2B | 0.48 Rec | 0.84(0.57-1.23) | 3.62E-01 | 9.96E-01 |
| rs6960842  | 7 PRKAR2B | 0.40 Add | 0.99(0.79-1.25) | 9.49E-01 | 9.97E-01 |
| rs11760261 | 7 PRKAR2B | 0.48 Add | 0.88(0.7-1.11)  | 2.77E-01 | 9.97E-01 |
| rs3801968  | 7 PRKAR2B | 0.48 Add | 0.88(0.7-1.11)  | 2.77E-01 | 9.97E-01 |
| rs257384   | 7 PRKAR2B | 0.41 Dom | 0.81(0.58-1.13) | 2.11E-01 | 9.97E-01 |
| rs1476878  | 7 PRKAR2B | 0.37 Dom | 1.02(0.74-1.41) | 8.96E-01 | 9.99E-01 |
| rs2251838  | 7 PRKAR2B | 0.31 Rec | 1.23(0.72-2.1)  | 4.42E-01 | 9.99E-01 |
| rs3801969  | 7 PRKAR2B | 0.39 Dom | 0.83(0.6-1.15)  | 2.66E-01 | 1.00E+00 |
| rs1544582  | 7 PRKAR2B | 0.36 Dom | 1.01(0.73-1.4)  | 9.31E-01 | 1.00E+00 |
| rs6969719  | 7 PRKAR2B | 0.43 Dom | 0.83(0.59-1.17) | 2.84E-01 | 1.00E+00 |
| rs12674011 | 7 PRKAR2B | 0.41 Add | 0.89(0.71-1.13) | 3.59E-01 | 1.00E+00 |
| rs741008   | 7 PRKAR2B | 0.40 Add | 0.9(0.71-1.13)  | 3.62E-01 | 1.00E+00 |
| rs6957586  | 7 PRKAR2B | 0.45 Rec | 1.03(0.7-1.51)  | 8.94E-01 | 1.00E+00 |
| rs2707374  | 7 PRKAR2B | 0.21 Dom | 1.1(0.79-1.53)  | 5.64E-01 | 1.00E+00 |
| rs997381   | 7 PRKAR2B | 0.36 Dom | 1.03(0.75-1.43) | 8.46E-01 | 1.00E+00 |
| rs2536492  | 7 PRKAR2B | 0.36 Dom | 1.03(0.75-1.43) | 8.46E-01 | 1.00E+00 |
| rs3735613  | 7 PRKAR2B | 0.40 Add | 0.91(0.72-1.15) | 4.18E-01 | 1.00E+00 |
| rs2237654  | 7 PRKAR2B | 0.40 Add | 0.91(0.72-1.15) | 4.24E-01 | 1.00E+00 |
| rs2536505  | 7 PRKAR2B | 0.21 Rec | 1.25(0.59-2.66) | 5.56E-01 | 1.00E+00 |
| rs2536490  | 7 PRKAR2B | 0.05 Add | 0.96(0.56-1.64) | 8.69E-01 | 1.00E+00 |
| rs12667954 | 7 PRKAR2B | 0.40 Add | 0.9(0.72-1.14)  | 3.99E-01 | 1.00E+00 |
| rs10487268 | 7 PRKAR2B | 0.01 Add | 1.29(0.56-3.01) | 5.49E-01 | 1.00E+00 |
| rs12705403 | 7 PRKAR2B | 0.39 Dom | 0.89(0.64-1.24) | 4.90E-01 | 1.00E+00 |
| rs2536501  | 7 PRKAR2B | 0.30 Add | 1.09(0.85-1.39) | 5.00E-01 | 1.00E+00 |
| rs2536502  | 7 PRKAR2B | 0.30 Add | 1.09(0.85-1.39) | 5.00E-01 | 1.00E+00 |
| rs2237652  | 7 PRKAR2B | 0.39 Dom | 0.89(0.64-1.24) | 4.97E-01 | 1.00E+00 |
| rs2707378  | 7 PRKAR2B | 0.10 Add | 0.96(0.65-1.41) | 8.37E-01 | 1.00E+00 |

|            |           |          |                 |          |          |
|------------|-----------|----------|-----------------|----------|----------|
| rs2244846  | 7 PRKAR2B | 0.37 Dom | 1.04(0.75-1.43) | 8.33E-01 | 1.00E+00 |
| rs7809330  | 7 PRKAR2B | 0.39 Dom | 0.89(0.64-1.24) | 5.00E-01 | 1.00E+00 |
| rs9648946  | 7 PRKAR2B | 0.40 Dom | 0.86(0.62-1.2)  | 3.84E-01 | 1.00E+00 |
| rs2536503  | 7 PRKAR2B | 0.21 Dom | 1.12(0.81-1.56) | 4.88E-01 | 1.00E+00 |
| rs2536504  | 7 PRKAR2B | 0.30 Add | 1.08(0.85-1.38) | 5.15E-01 | 1.00E+00 |
| rs10249401 | 7 PRKAR2B | 0.21 Add | 1.12(0.85-1.47) | 4.30E-01 | 1.00E+00 |
| rs2536508  | 7 PRKAR2B | 0.30 Rec | 1.14(0.67-1.96) | 6.26E-01 | 1.00E+00 |
| rs2237648  | 7 PRKAR2B | 0.35 Rec | 1.19(0.75-1.87) | 4.61E-01 | 1.00E+00 |
| rs917760   | 7 PRKAR2B | 0.39 Dom | 0.88(0.63-1.23) | 4.56E-01 | 1.00E+00 |
| rs2283037  | 7 PRKAR2B | 0.39 Dom | 0.88(0.63-1.23) | 4.56E-01 | 1.00E+00 |
| rs6466157  | 7 PRKAR2B | 0.39 Dom | 0.88(0.63-1.23) | 4.56E-01 | 1.00E+00 |
| rs2237650  | 7 PRKAR2B | 0.36 Dom | 1.05(0.76-1.45) | 7.63E-01 | 1.00E+00 |
| rs758943   | 7 PRKAR2B | 0.35 Rec | 1.18(0.75-1.86) | 4.66E-01 | 1.00E+00 |
| rs11766415 | 7 PRKAR2B | 0.36 Rec | 1.18(0.76-1.84) | 4.59E-01 | 1.00E+00 |
| rs2237656  | 7 PRKAR2B | 0.38 Dom | 0.9(0.64-1.25)  | 5.24E-01 | 1.00E+00 |
| rs257376   | 7 PRKAR2B | 0.46 Dom | 1.07(0.76-1.52) | 6.92E-01 | 1.00E+00 |
| rs1476879  | 7 PRKAR2B | 0.37 Dom | 1.05(0.76-1.45) | 7.82E-01 | 1.00E+00 |
| rs2536495  | 7 PRKAR2B | 0.37 Dom | 1.05(0.76-1.45) | 7.82E-01 | 1.00E+00 |
| rs10235601 | 7 PRKAR2B | 0.10 Add | 0.93(0.63-1.35) | 6.91E-01 | 1.00E+00 |
| rs9656135  | 7 PRKAR2B | 0.18 Dom | 1.07(0.76-1.49) | 7.11E-01 | 1.00E+00 |
| rs2302453  | 7 PRKAR2B | 0.38 Dom | 0.91(0.66-1.27) | 5.88E-01 | 1.00E+00 |
| rs2299419  | 7 PRKAR2B | 0.21 Dom | 1.14(0.82-1.58) | 4.35E-01 | 1.00E+00 |
| rs2395833  | 7 PRKAR2B | 0.45 Rec | 1.05(0.72-1.54) | 7.96E-01 | 1.00E+00 |
| rs2237649  | 7 PRKAR2B | 0.36 Dom | 1.04(0.76-1.44) | 7.97E-01 | 1.00E+00 |
| rs12705404 | 7 PRKAR2B | 0.31 Rec | 1.12(0.65-1.92) | 6.86E-01 | 1.00E+00 |
| rs2652511  | 5 SLC6A3  | 0.14 Rec | 0.19(0.03-1.5)  | 1.16E-01 | 8.74E-01 |
| rs27074    | 5 SLC6A3  | 0.39 Add | 0.8(0.63-1.01)  | 6.17E-02 | 9.19E-01 |
| rs2975226  | 5 SLC6A3  | 0.12 Add | 0.71(0.48-1.04) | 7.80E-02 | 9.39E-01 |
| rs2652510  | 5 SLC6A3  | 0.13 Dom | 0.76(0.51-1.13) | 1.71E-01 | 9.60E-01 |
| rs420422   | 5 SLC6A3  | 0.34 Dom | 0.76(0.55-1.04) | 9.11E-02 | 9.69E-01 |
| rs460000   | 5 SLC6A3  | 0.46 Dom | 0.75(0.53-1.05) | 9.47E-02 | 9.75E-01 |
| rs456774   | 5 SLC6A3  | 0.46 Dom | 0.75(0.53-1.05) | 9.69E-02 | 9.77E-01 |
| rs403636   | 5 SLC6A3  | 0.34 Dom | 0.77(0.56-1.06) | 1.08E-01 | 9.83E-01 |
| rs464528   | 5 SLC6A3  | 0.47 Dom | 0.76(0.54-1.07) | 1.18E-01 | 9.89E-01 |
| rs458860   | 5 SLC6A3  | 0.47 Dom | 0.76(0.54-1.07) | 1.18E-01 | 9.89E-01 |
| rs250682   | 5 SLC6A3  | 0.47 Dom | 0.76(0.54-1.07) | 1.18E-01 | 9.89E-01 |
| rs464061   | 5 SLC6A3  | 0.47 Dom | 0.76(0.54-1.07) | 1.18E-01 | 9.89E-01 |

|            |          |          |                 |          |          |
|------------|----------|----------|-----------------|----------|----------|
| rs393795   | 5 SLC6A3 | 0.47 Dom | 0.76(0.54-1.07) | 1.18E-01 | 9.89E-01 |
| rs409588   | 5 SLC6A3 | 0.47 Dom | 0.76(0.54-1.07) | 1.18E-01 | 9.89E-01 |
| rs460700   | 5 SLC6A3 | 0.47 Dom | 0.76(0.54-1.07) | 1.18E-01 | 9.89E-01 |
| rs8179029  | 5 SLC6A3 | 0.07 Add | 0.75(0.46-1.21) | 2.38E-01 | 9.93E-01 |
| rs456082   | 5 SLC6A3 | 0.47 Dom | 0.77(0.55-1.08) | 1.32E-01 | 9.93E-01 |
| rs6413429  | 5 SLC6A3 | 0.01 Add | 0.45(0.1-2.05)  | 2.99E-01 | 9.93E-01 |
| rs12652860 | 5 SLC6A3 | 0.41 Rec | 1.02(0.66-1.57) | 9.29E-01 | 9.95E-01 |
| rs2937639  | 5 SLC6A3 | 0.12 Rec | 0.27(0.03-2.2)  | 2.24E-01 | 9.96E-01 |
| rs2550948  | 5 SLC6A3 | 0.12 Rec | 0.27(0.03-2.2)  | 2.24E-01 | 9.96E-01 |
| rs40358    | 5 SLC6A3 | 0.38 Dom | 0.79(0.57-1.09) | 1.55E-01 | 9.96E-01 |
| rs11564767 | 5 SLC6A3 | 0.03 Add | 1.37(0.75-2.48) | 3.03E-01 | 9.99E-01 |
| rs2550956  | 5 SLC6A3 | 0.12 Rec | 0.31(0.04-2.5)  | 2.69E-01 | 9.99E-01 |
| rs3756450  | 5 SLC6A3 | 0.46 Rec | 1.18(0.81-1.73) | 3.90E-01 | 9.99E-01 |
| rs37022    | 5 SLC6A3 | 0.48 Rec | 1.26(0.88-1.81) | 2.13E-01 | 1.00E+00 |
| rs11564753 | 5 SLC6A3 | 0.39 Dom | 0.86(0.62-1.19) | 3.58E-01 | 1.00E+00 |
| rs3863145  | 5 SLC6A3 | 0.06 Dom | 0.86(0.51-1.44) | 5.68E-01 | 1.00E+00 |
| rs10040882 | 5 SLC6A3 | 0.11 Rec | 0.66(0.14-3.1)  | 5.95E-01 | 1.00E+00 |
| rs12654851 | 5 SLC6A3 | 0.46 Rec | 1.17(0.8-1.72)  | 4.20E-01 | 1.00E+00 |
| rs2975292  | 5 SLC6A3 | 0.11 Rec | 0.71(0.15-3.33) | 6.61E-01 | 1.00E+00 |
| rs2078247  | 5 SLC6A3 | 0.11 Rec | 0.37(0.04-3.06) | 3.54E-01 | 1.00E+00 |
| rs40184    | 5 SLC6A3 | 0.24 Rec | 0.81(0.4-1.63)  | 5.58E-01 | 1.00E+00 |
| rs10053602 | 5 SLC6A3 | 0.11 Rec | 0.63(0.14-2.97) | 5.62E-01 | 1.00E+00 |
| rs10052016 | 5 SLC6A3 | 0.11 Rec | 0.63(0.14-2.97) | 5.62E-01 | 1.00E+00 |
| rs6869645  | 5 SLC6A3 | 0.02 Add | 1.25(0.61-2.55) | 5.45E-01 | 1.00E+00 |
| rs11133767 | 5 SLC6A3 | 0.10 Add | 0.93(0.62-1.39) | 7.25E-01 | 1.00E+00 |
| rs11133762 | 5 SLC6A3 | 0.39 Dom | 1.12(0.8-1.57)  | 5.13E-01 | 1.00E+00 |
| rs37020    | 5 SLC6A3 | 0.36 Dom | 0.84(0.61-1.15) | 2.72E-01 | 1.00E+00 |
| rs464049   | 5 SLC6A3 | 0.36 Dom | 0.84(0.61-1.16) | 2.86E-01 | 1.00E+00 |
| rs250681   | 5 SLC6A3 | 0.36 Dom | 0.84(0.61-1.16) | 2.86E-01 | 1.00E+00 |
| rs250686   | 5 SLC6A3 | 0.36 Dom | 0.84(0.61-1.16) | 2.86E-01 | 1.00E+00 |
| rs458334   | 5 SLC6A3 | 0.36 Dom | 0.84(0.61-1.16) | 2.86E-01 | 1.00E+00 |
| rs3776512  | 5 SLC6A3 | 0.08 Add | 0.83(0.53-1.32) | 4.31E-01 | 1.00E+00 |
| rs3776511  | 5 SLC6A3 | 0.08 Add | 0.83(0.53-1.32) | 4.31E-01 | 1.00E+00 |
| rs2042449  | 5 SLC6A3 | 0.10 Add | 0.86(0.58-1.26) | 4.33E-01 | 1.00E+00 |
| rs2270912  | 5 SLC6A3 | 0.01 Add | 1(0.37-2.73)    | 9.92E-01 | 1.00E+00 |
| rs16877691 | 5 SLC6A3 | 0.01 Add | 1.01(0.37-2.75) | 9.79E-01 | 1.00E+00 |
| rs11564773 | 5 SLC6A3 | 0.02 Add | 1.11(0.53-2.32) | 7.85E-01 | 1.00E+00 |

|            |          |          |                 |          |          |
|------------|----------|----------|-----------------|----------|----------|
| rs1042098  | 5 SLC6A3 | 0.09 Dom | 0.94(0.61-1.45) | 7.79E-01 | 1.00E+00 |
| rs6350     | 5 SLC6A3 | 0.01 Add | 1.1(0.35-3.52)  | 8.66E-01 | 1.00E+00 |
| rs10064525 | 5 SLC6A3 | 0.06 Dom | 1.03(0.63-1.67) | 9.12E-01 | 1.00E+00 |
| rs6347     | 5 SLC6A3 | 0.11 Dom | 0.99(0.66-1.47) | 9.49E-01 | 1.00E+00 |
| rs356204   | 4 SNCA   | 0.42 Add | 0.77(0.61-0.97) | 2.94E-02 | 4.79E-01 |
| rs3822090  | 4 SNCA   | 0.45 Add | 0.78(0.62-0.98) | 3.39E-02 | 5.24E-01 |
| rs3775439  | 4 SNCA   | 0.45 Add | 0.78(0.62-0.99) | 3.85E-02 | 5.63E-01 |
| rs356164   | 4 SNCA   | 0.08 Add | 0.68(0.43-1.06) | 8.92E-02 | 5.63E-01 |
| rs356168   | 4 SNCA   | 0.42 Add | 0.78(0.62-0.99) | 4.21E-02 | 5.90E-01 |
| rs7690873  | 4 SNCA   | 0.46 Add | 0.79(0.63-0.99) | 4.39E-02 | 6.06E-01 |
| rs10516845 | 4 SNCA   | 0.46 Add | 0.79(0.63-0.99) | 4.39E-02 | 6.06E-01 |
| rs3796661  | 4 SNCA   | 0.46 Add | 0.79(0.63-0.99) | 4.39E-02 | 6.06E-01 |
| rs6834765  | 4 SNCA   | 0.46 Add | 0.79(0.63-0.99) | 4.39E-02 | 6.06E-01 |
| rs356221   | 4 SNCA   | 0.42 Add | 0.79(0.62-1)    | 4.69E-02 | 6.26E-01 |
| rs11931074 | 4 SNCA   | 0.47 Add | 0.79(0.63-1)    | 4.87E-02 | 6.36E-01 |
| rs2737029  | 4 SNCA   | 0.45 Add | 0.79(0.63-1)    | 4.84E-02 | 6.36E-01 |
| rs7655792  | 4 SNCA   | 0.47 Add | 0.79(0.63-1)    | 4.87E-02 | 6.39E-01 |
| rs10003708 | 4 SNCA   | 0.47 Add | 0.79(0.63-1)    | 4.87E-02 | 6.40E-01 |
| rs356200   | 4 SNCA   | 0.42 Add | 0.79(0.63-1)    | 4.97E-02 | 6.40E-01 |
| rs356220   | 4 SNCA   | 0.47 Add | 0.79(0.63-1)    | 4.87E-02 | 6.40E-01 |
| rs2736990  | 4 SNCA   | 0.42 Add | 0.79(0.63-1)    | 4.97E-02 | 6.41E-01 |
| rs3857051  | 4 SNCA   | 0.47 Add | 0.79(0.63-1)    | 5.06E-02 | 6.46E-01 |
| rs3857052  | 4 SNCA   | 0.47 Add | 0.79(0.63-1)    | 5.06E-02 | 6.47E-01 |
| rs7436973  | 4 SNCA   | 0.47 Add | 0.79(0.63-1)    | 5.06E-02 | 6.47E-01 |
| rs10033209 | 4 SNCA   | 0.47 Add | 0.8(0.63-1)     | 5.17E-02 | 6.53E-01 |
| rs7661330  | 4 SNCA   | 0.47 Add | 0.8(0.63-1)     | 5.17E-02 | 6.53E-01 |
| rs3775423  | 4 SNCA   | 0.47 Add | 0.8(0.63-1)     | 5.17E-02 | 6.54E-01 |
| rs3857057  | 4 SNCA   | 0.47 Add | 0.8(0.63-1.01)  | 5.64E-02 | 6.82E-01 |
| rs3857059  | 4 SNCA   | 0.47 Add | 0.8(0.63-1.01)  | 5.64E-02 | 6.83E-01 |
| rs3756054  | 4 SNCA   | 0.47 Add | 0.8(0.63-1.01)  | 5.64E-02 | 6.83E-01 |
| rs3775424  | 4 SNCA   | 0.47 Add | 0.8(0.63-1.01)  | 5.64E-02 | 6.83E-01 |
| rs8180214  | 4 SNCA   | 0.47 Add | 0.8(0.63-1.01)  | 5.85E-02 | 6.87E-01 |
| rs3775429  | 4 SNCA   | 0.07 Add | 0.68(0.43-1.09) | 1.13E-01 | 6.88E-01 |
| rs7675290  | 4 SNCA   | 0.47 Add | 0.8(0.63-1.01)  | 5.85E-02 | 6.88E-01 |
| rs17016071 | 4 SNCA   | 0.47 Add | 0.8(0.63-1.01)  | 5.85E-02 | 6.88E-01 |
| rs8180209  | 4 SNCA   | 0.47 Add | 0.8(0.63-1.01)  | 5.85E-02 | 6.88E-01 |
| rs356165   | 4 SNCA   | 0.47 Rec | 0.69(0.46-1.03) | 7.14E-02 | 6.97E-01 |

|            |        |          |                 |          |          |
|------------|--------|----------|-----------------|----------|----------|
| rs356203   | 4 SNCA | 0.47 Add | 0.8(0.64-1.01)  | 6.46E-02 | 7.02E-01 |
| rs7681815  | 4 SNCA | 0.47 Rec | 0.69(0.46-1.04) | 7.61E-02 | 7.17E-01 |
| rs356219   | 4 SNCA | 0.47 Rec | 0.69(0.46-1.04) | 7.61E-02 | 7.17E-01 |
| rs7681312  | 4 SNCA | 0.47 Rec | 0.69(0.46-1.04) | 7.61E-02 | 7.18E-01 |
| rs356198   | 4 SNCA | 0.08 Dom | 0.71(0.45-1.14) | 1.57E-01 | 7.37E-01 |
| rs3775442  | 4 SNCA | 0.35 Add | 1.22(0.97-1.53) | 9.34E-02 | 7.95E-01 |
| rs3822091  | 4 SNCA | 0.35 Add | 1.22(0.97-1.53) | 9.34E-02 | 7.96E-01 |
| rs3729594  | 4 SNCA | 0.35 Add | 1.22(0.97-1.53) | 9.34E-02 | 7.96E-01 |
| rs17016193 | 4 SNCA | 0.35 Add | 1.22(0.97-1.53) | 9.34E-02 | 7.96E-01 |
| rs6532190  | 4 SNCA | 0.35 Add | 1.22(0.97-1.53) | 9.34E-02 | 7.96E-01 |
| rs10516847 | 4 SNCA | 0.35 Add | 1.22(0.97-1.53) | 9.34E-02 | 7.96E-01 |
| rs3898322  | 4 SNCA | 0.35 Add | 1.22(0.97-1.53) | 9.34E-02 | 7.96E-01 |
| rs3775444  | 4 SNCA | 0.35 Add | 1.22(0.97-1.53) | 9.34E-02 | 7.96E-01 |
| rs3822088  | 4 SNCA | 0.35 Add | 1.22(0.97-1.53) | 9.34E-02 | 7.96E-01 |
| rs3775438  | 4 SNCA | 0.35 Add | 1.22(0.97-1.53) | 9.34E-02 | 7.96E-01 |
| rs3775450  | 4 SNCA | 0.36 Add | 1.22(0.97-1.53) | 9.50E-02 | 8.01E-01 |
| rs894278   | 4 SNCA | 0.36 Add | 1.22(0.97-1.53) | 9.50E-02 | 8.01E-01 |
| rs961386   | 4 SNCA | 0.36 Add | 1.22(0.97-1.53) | 9.50E-02 | 8.01E-01 |
| rs17016235 | 4 SNCA | 0.36 Add | 1.22(0.97-1.53) | 9.57E-02 | 8.03E-01 |
| rs7681440  | 4 SNCA | 0.12 Add | 0.82(0.58-1.16) | 2.62E-01 | 8.21E-01 |
| rs2301134  | 4 SNCA | 0.12 Add | 0.82(0.58-1.16) | 2.62E-01 | 8.21E-01 |
| rs7687945  | 4 SNCA | 0.12 Add | 0.82(0.58-1.16) | 2.62E-01 | 8.21E-01 |
| rs1372522  | 4 SNCA | 0.12 Add | 0.82(0.58-1.16) | 2.62E-01 | 8.21E-01 |
| rs1372519  | 4 SNCA | 0.12 Add | 0.82(0.58-1.16) | 2.62E-01 | 8.21E-01 |
| rs17016188 | 4 SNCA | 0.36 Add | 1.2(0.96-1.52)  | 1.11E-01 | 8.47E-01 |
| rs10009760 | 4 SNCA | 0.32 Add | 0.83(0.65-1.06) | 1.37E-01 | 8.78E-01 |
| rs2870028  | 4 SNCA | 0.32 Add | 0.83(0.65-1.06) | 1.37E-01 | 8.79E-01 |
| rs356188   | 4 SNCA | 0.14 Add | 0.78(0.56-1.1)  | 1.60E-01 | 8.84E-01 |
| rs356191   | 4 SNCA | 0.14 Add | 0.78(0.56-1.1)  | 1.60E-01 | 8.84E-01 |
| rs11097234 | 4 SNCA | 0.33 Dom | 0.84(0.61-1.16) | 2.88E-01 | 8.85E-01 |
| rs12502363 | 4 SNCA | 0.33 Dom | 0.84(0.61-1.16) | 2.88E-01 | 8.85E-01 |
| rs7356228  | 4 SNCA | 0.33 Rec | 0.74(0.42-1.28) | 2.76E-01 | 8.87E-01 |
| rs10155475 | 4 SNCA | 0.33 Rec | 0.74(0.42-1.28) | 2.76E-01 | 8.87E-01 |
| rs3822095  | 4 SNCA | 0.33 Rec | 0.74(0.42-1.28) | 2.76E-01 | 8.87E-01 |
| rs2619368  | 4 SNCA | 0.13 Dom | 0.82(0.56-1.2)  | 3.03E-01 | 8.89E-01 |
| rs2572318  | 4 SNCA | 0.13 Dom | 0.82(0.56-1.2)  | 3.03E-01 | 8.89E-01 |
| rs356186   | 4 SNCA | 0.13 Dom | 0.82(0.56-1.2)  | 3.03E-01 | 8.89E-01 |

|            |        |          |                 |          |          |
|------------|--------|----------|-----------------|----------|----------|
| rs2197120  | 4 SNCA | 0.13 Dom | 0.82(0.56-1.2)  | 3.03E-01 | 8.89E-01 |
| rs1471483  | 4 SNCA | 0.12 Dom | 0.82(0.56-1.21) | 3.20E-01 | 8.90E-01 |
| rs3796664  | 4 SNCA | 0.33 Dom | 0.84(0.61-1.16) | 3.01E-01 | 8.91E-01 |
| rs2119787  | 4 SNCA | 0.33 Dom | 0.84(0.61-1.16) | 3.01E-01 | 8.91E-01 |
| rs6848726  | 4 SNCA | 0.33 Dom | 0.84(0.61-1.16) | 3.01E-01 | 8.91E-01 |
| rs1442144  | 4 SNCA | 0.12 Rec | 0.57(0.12-2.64) | 4.70E-01 | 8.91E-01 |
| rs1837891  | 4 SNCA | 0.13 Add | 0.82(0.58-1.17) | 2.79E-01 | 8.94E-01 |
| rs10005233 | 4 SNCA | 0.13 Add | 0.82(0.58-1.17) | 2.79E-01 | 8.94E-01 |
| rs6532191  | 4 SNCA | 0.13 Dom | 0.81(0.55-1.19) | 2.79E-01 | 8.94E-01 |
| rs11097238 | 4 SNCA | 0.32 Rec | 0.74(0.43-1.29) | 2.86E-01 | 8.96E-01 |
| rs7356297  | 4 SNCA | 0.32 Rec | 0.74(0.43-1.29) | 2.86E-01 | 8.96E-01 |
| rs1812923  | 4 SNCA | 0.32 Rec | 0.7(0.41-1.21)  | 2.03E-01 | 9.05E-01 |
| rs2737020  | 4 SNCA | 0.32 Rec | 0.73(0.42-1.25) | 2.50E-01 | 9.09E-01 |
| rs2619372  | 4 SNCA | 0.32 Rec | 0.73(0.42-1.25) | 2.50E-01 | 9.09E-01 |
| rs974711   | 4 SNCA | 0.32 Rec | 0.73(0.42-1.25) | 2.50E-01 | 9.09E-01 |
| rs1471484  | 4 SNCA | 0.12 Dom | 0.83(0.56-1.23) | 3.51E-01 | 9.10E-01 |
| rs10002435 | 4 SNCA | 0.19 Rec | 1.2(0.51-2.83)  | 6.75E-01 | 9.12E-01 |
| rs10014396 | 4 SNCA | 0.19 Rec | 1.2(0.51-2.83)  | 6.75E-01 | 9.12E-01 |
| rs17016168 | 4 SNCA | 0.19 Rec | 1.2(0.51-2.83)  | 6.75E-01 | 9.12E-01 |
| rs2619355  | 4 SNCA | 0.13 Dom | 0.83(0.57-1.22) | 3.50E-01 | 9.14E-01 |
| rs3113355  | 4 SNCA | 0.13 Dom | 0.83(0.57-1.22) | 3.50E-01 | 9.14E-01 |
| rs2619356  | 4 SNCA | 0.13 Dom | 0.83(0.57-1.22) | 3.50E-01 | 9.14E-01 |
| rs1811442  | 4 SNCA | 0.13 Dom | 0.83(0.57-1.22) | 3.50E-01 | 9.14E-01 |
| rs2583978  | 4 SNCA | 0.13 Dom | 0.83(0.57-1.22) | 3.50E-01 | 9.14E-01 |
| rs2583968  | 4 SNCA | 0.13 Dom | 0.83(0.57-1.22) | 3.50E-01 | 9.14E-01 |
| rs2583975  | 4 SNCA | 0.13 Dom | 0.83(0.57-1.22) | 3.50E-01 | 9.14E-01 |
| rs2583979  | 4 SNCA | 0.13 Dom | 0.83(0.57-1.22) | 3.50E-01 | 9.14E-01 |
| rs1837890  | 4 SNCA | 0.32 Rec | 0.71(0.42-1.23) | 2.21E-01 | 9.25E-01 |
| rs1442143  | 4 SNCA | 0.32 Rec | 0.71(0.42-1.23) | 2.21E-01 | 9.25E-01 |
| rs10011157 | 4 SNCA | 0.11 Add | 0.84(0.59-1.2)  | 3.33E-01 | 9.26E-01 |
| rs3775448  | 4 SNCA | 0.19 Rec | 1.16(0.49-2.72) | 7.36E-01 | 9.32E-01 |
| rs3775461  | 4 SNCA | 0.19 Rec | 1.16(0.49-2.72) | 7.36E-01 | 9.32E-01 |
| rs17016183 | 4 SNCA | 0.19 Rec | 1.16(0.49-2.72) | 7.36E-01 | 9.32E-01 |
| rs3775447  | 4 SNCA | 0.19 Rec | 1.16(0.49-2.72) | 7.36E-01 | 9.32E-01 |
| rs17016255 | 4 SNCA | 0.19 Rec | 1.16(0.49-2.72) | 7.36E-01 | 9.32E-01 |
| rs7684892  | 4 SNCA | 0.19 Rec | 1.16(0.49-2.72) | 7.36E-01 | 9.32E-01 |
| rs7689942  | 4 SNCA | 0.19 Rec | 1.16(0.49-2.72) | 7.36E-01 | 9.32E-01 |

|            |        |          |                 |          |          |
|------------|--------|----------|-----------------|----------|----------|
| rs3906824  | 4 SNCA | 0.19 Rec | 1.16(0.49-2.72) | 7.36E-01 | 9.32E-01 |
| rs3889916  | 4 SNCA | 0.19 Rec | 1.16(0.49-2.72) | 7.36E-01 | 9.32E-01 |
| rs7684637  | 4 SNCA | 0.19 Rec | 1.16(0.49-2.72) | 7.36E-01 | 9.32E-01 |
| rs2035268  | 4 SNCA | 0.19 Rec | 1.16(0.49-2.72) | 7.36E-01 | 9.32E-01 |
| rs6829514  | 4 SNCA | 0.19 Rec | 1.16(0.49-2.72) | 7.36E-01 | 9.32E-01 |
| rs3775446  | 4 SNCA | 0.19 Rec | 1.16(0.49-2.72) | 7.36E-01 | 9.32E-01 |
| rs3889917  | 4 SNCA | 0.19 Rec | 1.16(0.49-2.72) | 7.36E-01 | 9.32E-01 |
| rs3756057  | 4 SNCA | 0.19 Rec | 1.16(0.49-2.72) | 7.36E-01 | 9.32E-01 |
| rs17016190 | 4 SNCA | 0.19 Rec | 1.16(0.49-2.72) | 7.36E-01 | 9.32E-01 |
| rs3775443  | 4 SNCA | 0.19 Rec | 1.16(0.49-2.72) | 7.36E-01 | 9.32E-01 |
| rs3756056  | 4 SNCA | 0.19 Rec | 1.16(0.49-2.72) | 7.36E-01 | 9.32E-01 |
| rs3910104  | 4 SNCA | 0.32 Add | 0.86(0.67-1.1)  | 2.32E-01 | 9.38E-01 |
| rs17795208 | 4 SNCA | 0.05 Dom | 1.01(0.61-1.69) | 9.54E-01 | 9.54E-01 |
| rs3755907  | 4 TDO2 | 0.08 Add | 1.32(0.89-1.97) | 1.72E-01 | 8.98E-01 |
| rs2271537  | 4 TDO2 | 0.26 Rec | 1.73(0.91-3.29) | 9.25E-02 | 9.05E-01 |
| rs17033799 | 4 TDO2 | 0.01 Add | 2.01(0.72-5.59) | 1.83E-01 | 9.17E-01 |
| rs3796551  | 4 TDO2 | 0.08 Add | 1.29(0.86-1.93) | 2.21E-01 | 9.46E-01 |
| rs13125676 | 4 TDO2 | 0.08 Add | 1.28(0.86-1.92) | 2.27E-01 | 9.51E-01 |
| rs2271538  | 4 TDO2 | 0.04 Dom | 1.38(0.81-2.37) | 2.36E-01 | 9.51E-01 |
| rs3755910  | 4 TDO2 | 0.04 Dom | 1.38(0.81-2.36) | 2.41E-01 | 9.53E-01 |
| rs10020753 | 4 TDO2 | 0.04 Add | 1.37(0.8-2.33)  | 2.48E-01 | 9.56E-01 |
| rs13434811 | 4 TDO2 | 0.04 Add | 1.37(0.8-2.33)  | 2.48E-01 | 9.56E-01 |
| rs3775085  | 4 TDO2 | 0.08 Dom | 1.27(0.83-1.94) | 2.74E-01 | 9.57E-01 |
| rs10857287 | 4 TDO2 | 0.08 Add | 1.26(0.85-1.88) | 2.52E-01 | 9.59E-01 |
| rs13152449 | 4 TDO2 | 0.04 Add | 1.34(0.8-2.27)  | 2.69E-01 | 9.63E-01 |
| rs6817205  | 4 TDO2 | 0.04 Add | 1.34(0.8-2.27)  | 2.69E-01 | 9.63E-01 |
| rs2292537  | 4 TDO2 | 0.02 Dom | 1.02(0.48-2.15) | 9.67E-01 | 9.67E-01 |
| rs1543108  | 4 TDO2 | 0.05 Add | 1.15(0.67-1.99) | 6.05E-01 | 9.69E-01 |
| rs13128945 | 4 TDO2 | 0.02 Add | 1.23(0.57-2.65) | 5.98E-01 | 9.76E-01 |
| rs6856354  | 4 TDO2 | 0.28 Dom | 1.23(0.89-1.69) | 2.07E-01 | 9.78E-01 |
| rs2292536  | 4 TDO2 | 0.20 Rec | 1.15(0.5-2.62)  | 7.47E-01 | 9.84E-01 |
| rs17379906 | 4 TDO2 | 0.10 Rec | 0.38(0.04-3.38) | 3.83E-01 | 9.85E-01 |
| rs17033763 | 4 TDO2 | 0.10 Rec | 0.38(0.04-3.38) | 3.83E-01 | 9.85E-01 |
| rs10517626 | 4 TDO2 | 0.10 Rec | 1.12(0.22-5.7)  | 8.89E-01 | 9.88E-01 |
| rs2878125  | 4 TDO2 | 0.10 Rec | 1.12(0.22-5.7)  | 8.89E-01 | 9.88E-01 |
| rs12502494 | 4 TDO2 | 0.10 Rec | 1.12(0.22-5.7)  | 8.89E-01 | 9.88E-01 |
| rs9044     | 4 TDO2 | 0.22 Add | 1.17(0.89-1.54) | 2.54E-01 | 9.89E-01 |



|            |        |          |                 |          |          |
|------------|--------|----------|-----------------|----------|----------|
| rs11723579 | 4 TDO2 | 0.25 Rec | 1.47(0.74-2.93) | 2.77E-01 | 9.90E-01 |
| rs16998970 | 4 TDO2 | 0.06 Add | 0.86(0.53-1.41) | 5.56E-01 | 9.91E-01 |
| rs6856558  | 4 TDO2 | 0.18 Add | 1.13(0.84-1.52) | 4.15E-01 | 9.93E-01 |
| rs11043001 | 11 TH  | 0.13 Rec | 2.82(0.97-8.19) | 5.66E-02 | 8.13E-01 |
| rs10840491 | 11 TH  | 0.11 Rec | 2.02(0.52-7.82) | 3.09E-01 | 9.87E-01 |
| rs11043016 | 11 TH  | 0.09 Dom | 0.8(0.52-1.24)  | 3.11E-01 | 9.88E-01 |
| rs7482891  | 11 TH  | 0.09 Dom | 0.81(0.52-1.28) | 3.68E-01 | 9.92E-01 |
| rs11042982 | 11 TH  | 0.11 Dom | 1.19(0.82-1.74) | 3.63E-01 | 9.93E-01 |
| rs6578993  | 11 TH  | 0.10 Add | 1.25(0.88-1.78) | 2.11E-01 | 9.95E-01 |
| rs10743149 | 11 TH  | 0.03 Dom | 0.75(0.39-1.46) | 3.99E-01 | 9.95E-01 |
| rs11564708 | 11 TH  | 0.04 Add | 1(0.55-1.81)    | 9.95E-01 | 9.95E-01 |
| rs11043007 | 11 TH  | 0.21 Add | 1.15(0.88-1.51) | 2.96E-01 | 9.97E-01 |
| rs10840489 | 11 TH  | 0.10 Rec | 1.79(0.39-8.14) | 4.53E-01 | 9.97E-01 |
| rs4320932  | 11 TH  | 0.43 Rec | 1.25(0.85-1.83) | 2.61E-01 | 9.97E-01 |
| rs1004446  | 11 TH  | 0.29 Rec | 1.39(0.79-2.43) | 2.52E-01 | 9.98E-01 |
| rs11564703 | 11 TH  | 0.21 Add | 1.14(0.87-1.49) | 3.42E-01 | 9.98E-01 |
| rs11564710 | 11 TH  | 0.20 Dom | 1.03(0.74-1.44) | 8.68E-01 | 9.99E-01 |
| rs10840495 | 11 TH  | 0.07 Dom | 0.87(0.55-1.39) | 5.68E-01 | 9.99E-01 |
| rs7115640  | 11 TH  | 0.07 Dom | 0.87(0.55-1.39) | 5.68E-01 | 9.99E-01 |
| rs7396243  | 11 TH  | 0.22 Dom | 1.1(0.79-1.52)  | 5.86E-01 | 9.99E-01 |
| rs7119275  | 11 TH  | 0.07 Dom | 0.88(0.55-1.4)  | 5.76E-01 | 9.99E-01 |
| rs7924316  | 11 TH  | 0.39 Rec | 1.13(0.74-1.73) | 5.68E-01 | 9.99E-01 |
| rs4929966  | 11 TH  | 0.04 Add | 1.18(0.65-2.14) | 5.78E-01 | 9.99E-01 |
| rs6356     | 11 TH  | 0.17 Add | 1.05(0.78-1.4)  | 7.53E-01 | 1.00E+00 |
| rs10770140 | 11 TH  | 0.08 Add | 0.91(0.59-1.4)  | 6.68E-01 | 1.00E+00 |
| rs10770141 | 11 TH  | 0.07 Dom | 0.92(0.57-1.49) | 7.34E-01 | 1.00E+00 |
| rs4930046  | 11 TH  | 0.18 Dom | 1.12(0.8-1.57)  | 5.17E-01 | 1.00E+00 |
| rs10840490 | 11 TH  | 0.11 Rec | 1.33(0.38-4.66) | 6.52E-01 | 1.00E+00 |
| rs11564707 | 11 TH  | 0.08 Add | 0.9(0.59-1.39)  | 6.44E-01 | 1.00E+00 |
| rs11043003 | 11 TH  | 0.08 Add | 0.9(0.59-1.39)  | 6.44E-01 | 1.00E+00 |
| rs7129483  | 11 TH  | 0.08 Add | 0.9(0.59-1.39)  | 6.44E-01 | 1.00E+00 |
| rs11564705 | 11 TH  | 0.08 Dom | 0.89(0.57-1.39) | 6.09E-01 | 1.00E+00 |
| rs3842748  | 11 TH  | 0.04 Add | 1(0.56-1.81)    | 9.89E-01 | 1.00E+00 |
| rs11042978 | 11 TH  | 0.19 Rec | 0.87(0.36-2.09) | 7.55E-01 | 1.00E+00 |
| rs2070762  | 11 TH  | 0.41 Rec | 1.16(0.77-1.75) | 4.81E-01 | 1.00E+00 |
